# Supplementary material for: Vesicular trafficking is a key determinant of the statin response in acute myeloid leukemia
Source: PubMed Central journal article supplement — Blood Adv. 2022 Jan 18;6(2):509–14. doi: 10.1182/bloodadvances.2021006047 (PMC8791584; doi:10.1182/bloodadvances.2021006047), 2022-01-18
Supplement: advancesADV2021006047-suppl1.pdf [file advancesADV2021006047-suppl1.pdf]

## SUPPLEMENTARY METHODS

**Cell culture.** All experiments were performed using our chemically defined, serum- and lipid-free media that transiently supports *in vitro* activity of AML blasts (Pabst *et al.*, Nature methods, 2014, 11(4):436-442). Thawed AML cells were plated in 384-well plates at a density 5,000 cells per well in 50  $\mu$ L.

**Compounds.** Atorvastatin, simvastatin, lovastatin, fluvastatin and mevastatin were purchased from Abcam, rosuvastatin from BioVision Inc., pravastatin from Sigma and cytarabine and daunorubicin from TOCRIS. Compound stocks and 7 serial dilutions of each for total of 1000-fold range of concentrations were prepared in DMSO. Prior to addition to cells, compound stocks were diluted 100-fold in media such that the final DMSO concentration in cell culture did not exceed 0.1%. Cells treated with 0.1% DMSO (vehicle control) were used as negative controls.

**Chemical screens.** In screen I, compounds from an in-house generated library of ~5000 compounds enriched for clinically approved drugs including statins were tested at a single concentration of 2.5  $\mu$ M, and cell viability was assessed with the CellTiterGlo assay (Promega, Madison, WI, USA) after 6 days of treatment. Percentages of inhibition of cell viability were calculated as follows:  $100 - (100 \times (\text{average signal in compound-treated wells}) / (\text{average signal in DMSO-treated wells}))$ . In other screens, compounds were tested in dose response using serial compound dilutions (ten 1:3 dilutions from 10  $\mu$ M to 0.5 nM) and cell viability after 6 days of incubation was also evaluated with the CellTiterGlo assay. IC50s were calculated using the ActivityBase SARview Suite (IDBS) and GraphPad Prism 4.03.

**CRISPR/Cas9-based genetic screening:** The Extended Knockout (EKO) pooled lentiviral library was introduced in the NALM-6 cells line along with a doxycycline-inducible Cas9. At the beginning of the experiment (day 0) Cas9 was induced with 2 mg/mL doxycycline for 7 days to induce gene knockouts (day 7) after which time cells were treated with DMSO or 150nM cerivastatin (IC40) for 8 days additional days (day 15). Genomic DNA was then extracted from day 15 DMSO and cerivastatin treated cells along with day 7 untreated cells using the QIAamp DNA blood maxi kit (Qiagen). sgRNA sequences were recovered and fitted with Illumina adaptors by PCR, and NGS was performed on an Illumina NextSeq 500 device (IRIC's genomic platform, Montreal, Quebec, Canada). Synthetic rescue scores were determined using the RANKS algorithm using sgRNA read numbers for the cerivastatin-treated sample at day 15 compared to day 7 untreated cells, whereas synthetic lethal scores were calculated using the RANKS algorithm by comparing cerivastatin- and DMSO-treated samples at day 15. Additional details related to the experiment and to the RANKS algorithm can be found in Bertomeu *et al.*, Mol Cell Biol, 2018 and Baccelli *et al.*, Cancer Cell, 2019.

**Validation experiments with shRNAs.** Lentiviral vectors were generated by cloning the selected hairpin containing templates in the L-T3-GUPR vector carrying puromycin resistance gene and tetracyclin-inducible green fluorescent protein (GFP). Vector carrying shRNA targeting luciferase was used as a control. Production of lentiviral particles and infection of OCI-AML5 cells were performed as described (Baccelli *et al.*, Cancer Cell, 2019, 36(1):84-99). Infected cells were

selected and expanded in media containing 2 µg/ml of Puromycin, and shRNA expression was induced by treatment of the transduced cells with 2 µg/ml of doxorubicin. Efficiency of knockdown was assessed after 1 day of induction by quantitative RT-PCR. Effect of knockdown on atorvastatin sensitivity was evaluated in dose response assays performed in media supplemented with 10% BIT, 5 ng/ml GM-CSF, 2 µl/ml puromycin and 2 µl/ml doxocyclin. Cell viability after 4-day exposure to DMSO or atorvastatin was evaluated using CellTiter Glo (Promega).

**TH-Z145 compound synthesis.** TH-Z145 was prepared according to the following synthetic sequence. First, 3-hydroxymethyl phenol (1) was selectively alkylated with 1-bromooctane and the resulting octyl ether (2) was transformed in two steps into the TH-Z145 (4) bisphosphonate tetraethyl ester. The benzyl alcohol was first transformed to the benzyl bromide which, after purification by chromatography on silica gel, was reacted with the sodium anion of tetraethyl methylene bisphosphonate to afford homobenzylic bisphosphonate tetraethyl ester (3). The bisphosphonic acid TH-Z145 (4) was then obtained by treating the ester with concentrated hydrochloric acid at 100 °C overnight and injecting the cooled and diluted mixture into a reverse-phase preparative HPLC instrument. Alternatively, the tetra-ester was treated with TMSBr for 16 h, and upon a hydrolysis work-up, the sample was freeze-dried to give TH-Z145 without the need for further purification.

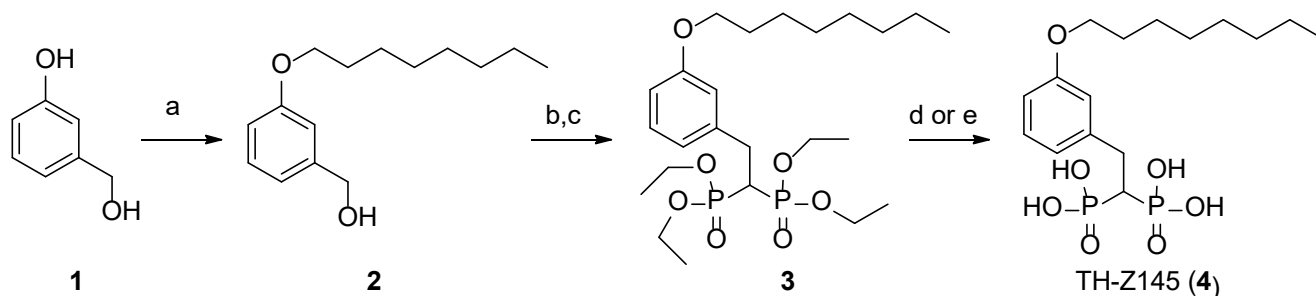

**Next-generation sequencing.** RNA isolation, preparation of cDNA libraries and sequencing of primary AML specimens of the Leucegene cohort as well as normal blood and bone marrow cell populations were performed as described (Lavallée *et al.*, Nature genetics, 2015, 47(9):1030-1037). The RNA sequencing data is available at GEO or in the Leucegene website ([leucegene.ca/research/resources](http://leucegene.ca/research/resources)).

**Statistics.** Analyses were performed using GraphPad Prism V4.03. Significance of the difference between median IC<sub>50</sub> values were tested using Mann-Whitney test. Fisher exact test was used to analyze sample term enrichment. Correlation between compound responses was evaluated using Spearman's rank-order correlation test. Gene set enrichment analyses were performed using the GSEA 4.1.0 software from the Broad Institute.

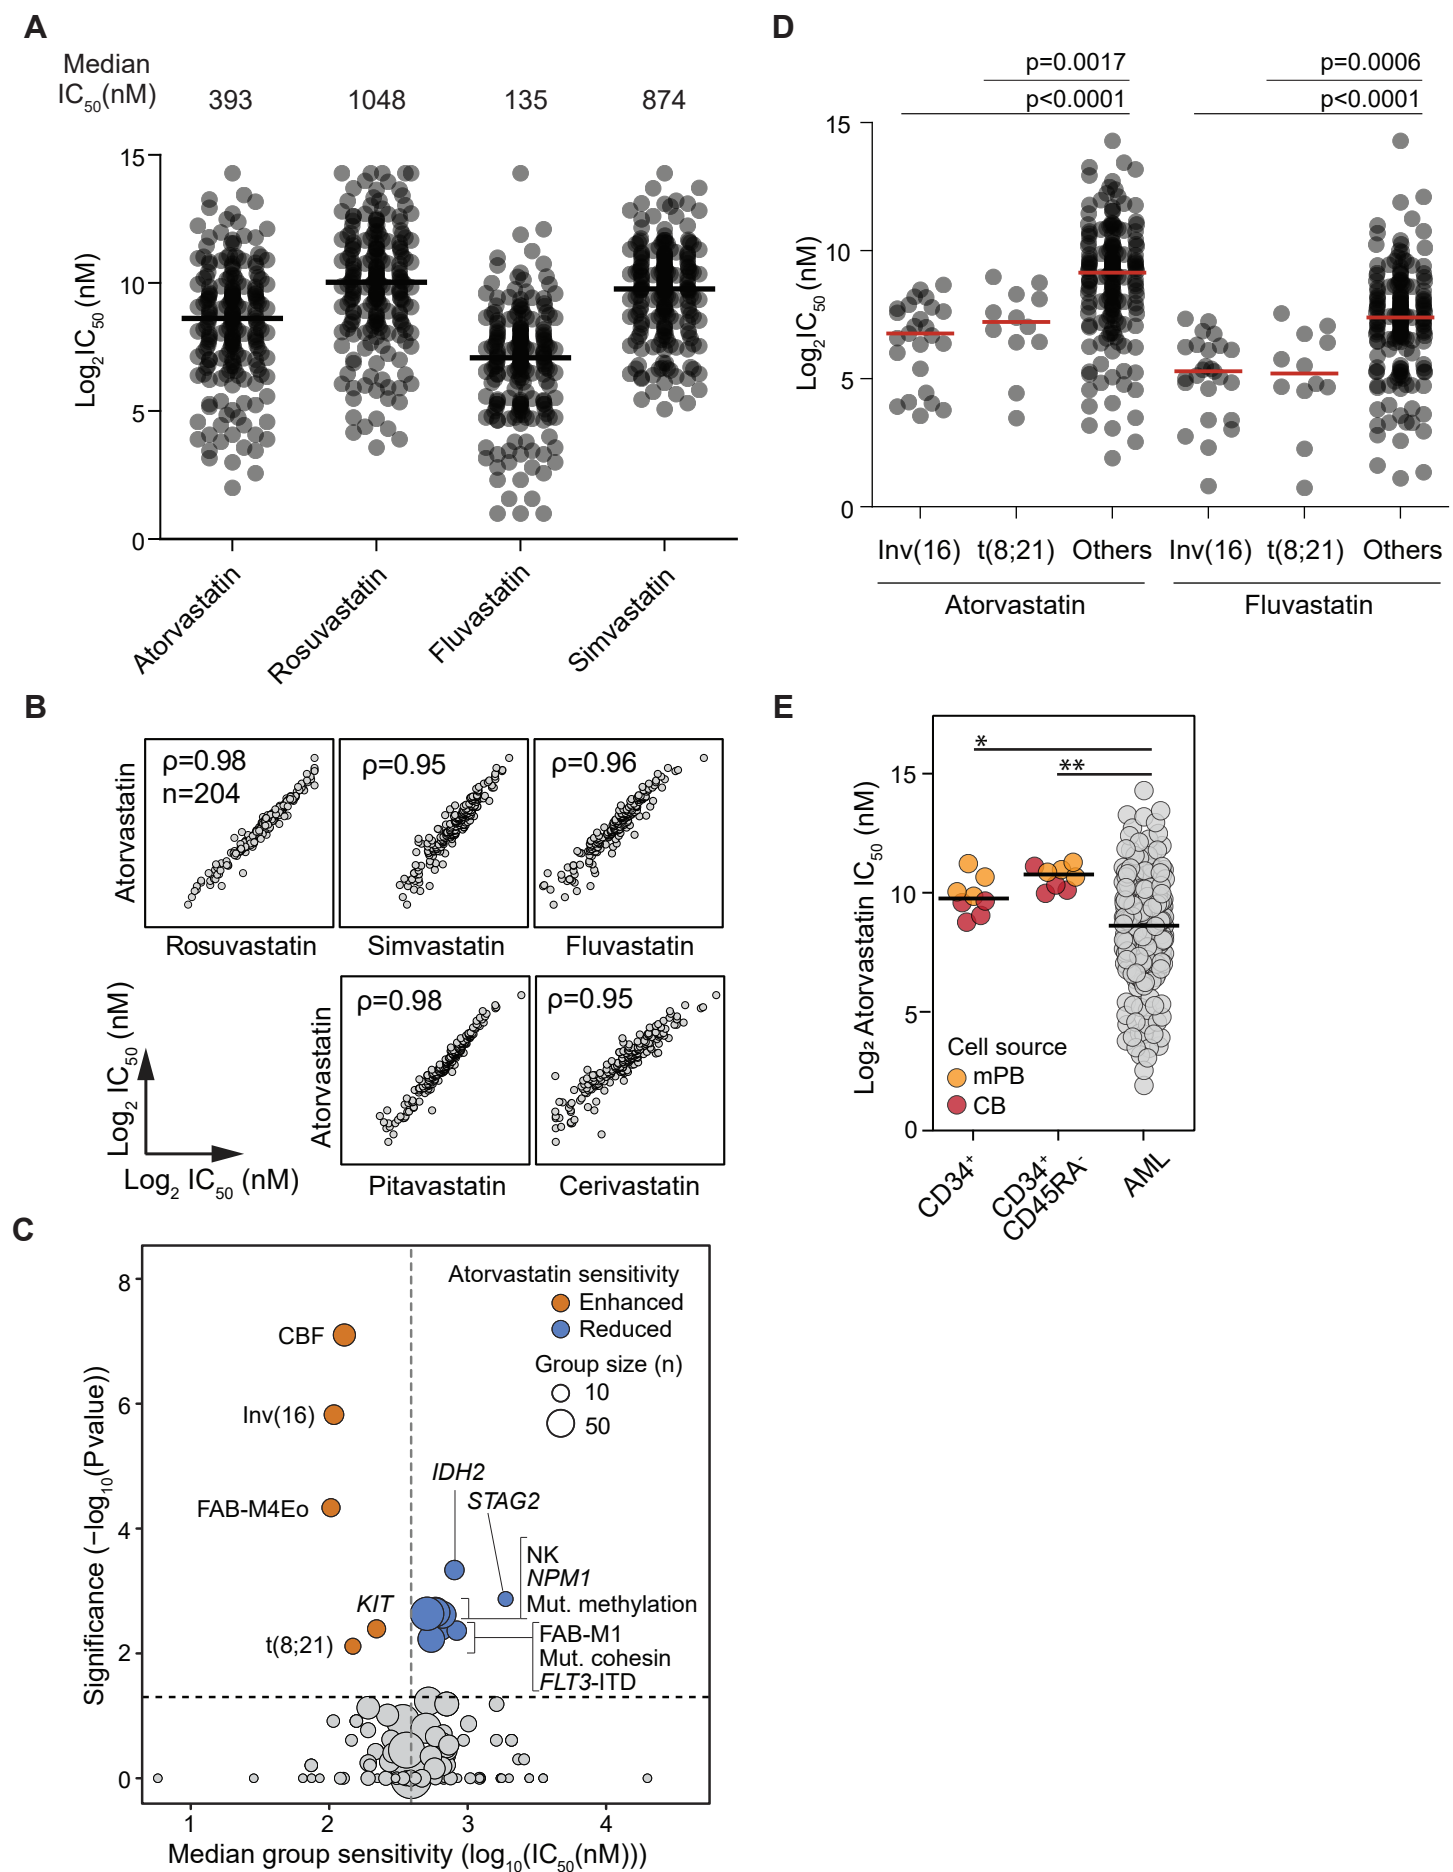

**Figure S1.** A) Sensitivity of primary human AML specimens ( $n=204$ ) to indicated statins. Median  $IC_{50}$  for each statin is represented by a black bar. B) Correlation between statin  $IC_{50}$  values determined for the 204 specimens.  $\rho$ : Spearman correlation coefficient. C) Contribution of mutations, clinical and morphological characteristics to statin sensitivity of AML cells. Vertical dotted line: median atorvastatin  $IC_{50}$  value determined for 205 AML specimens (393 nM). Horizontal dotted line: demarcation of significance ( $p=0.05$ ). CBF: core-binding factor, FAB: French-American-British classification, NK: normal karyotype, ITD: internal tandem duplication, Mut. Methylation: mutations in genes implicated in methylation. D) Atorvastatin and fluvastatin sensitivity of primary human AML specimens from indicated cytogenetic subgroups. Median  $IC_{50}$  for each AML subgroup is represented by a red bar. E) Atorvastatin response of normal mobilized peripheral blood (mPB)- and cord blood (CB)-derived CD34<sup>+</sup> and CD34<sup>+</sup>CD45RA<sup>-</sup> cells. \*  $p<0.05$ , \*\* $p<0.001$

| Drug combination       | Cell line | Mean Bliss score | Mean HSA score | Mean Loewe score | Mean ZIP score |
|------------------------|-----------|------------------|----------------|------------------|----------------|
| Atorvastatin + TH-Z145 | AML3      | 16.42477         | 12.51586       | 12.53856         | 15.98080       |
| Atorvastatin + TH-Z145 | AML5      | 12.57265         | 13.84423       | 6.07595          | 13.36656       |
| Cytarabine + TH-Z145   | AML3      | 0.63513          | -0.05893       | -1.97478         | -2.24044       |
| Cytarabine + TH-Z145   | AML5      | -4.23565         | -1.55180       | -4.03980         | -6.50716       |

**Figure S2.** Mean synergy scores for the atorvastatin/TH-Z145 and cytarabine/TH-Z145 combinations using the Bliss, HSA, Loewe and ZIP methods in indicated AML cell lines.

| GENE SET                                                             | NES  | FDR    |
|----------------------------------------------------------------------|------|--------|
| Golgi vesicle transport                                              | 3.90 | <0.001 |
| Endoplasmic reticulum to golgi vesicle mediated transport            | 3.78 | <0.001 |
| Vesicle targeting                                                    | 3.41 | <0.001 |
| Vesicle targeting to from or within golgi                            | 3.39 | <0.001 |
| COPII coated vesicle budding                                         | 3.36 | <0.001 |
| Intra golgi and retrograde golgi to ER traffic                       | 3.35 | <0.001 |
| Golgi vesicle budding                                                | 3.34 | <0.001 |
| Vesicle budding from membrane                                        | 3.23 | <0.001 |
| COPII mediated vesicle transport                                     | 3.20 | <0.001 |
| Vesicle localization                                                 | 3.05 | <0.001 |
| Membrane trafficking                                                 | 3.02 | <0.001 |
| Vesicle organization                                                 | 2.97 | <0.001 |
| Vesicle mediated transport                                           | 2.92 | <0.001 |
| Transport vesicle                                                    | 2.85 | <0.001 |
| COPII coated ER to golgi transport vesicle                           | 2.73 | <0.001 |
| Transport vesicle membrane                                           | 2.67 | 0.0014 |
| Golgi associated vesicle                                             | 2.61 | 0.0025 |
| Golgi associated vesicle membrane                                    | 2.59 | 0.0027 |
| ER to golgi transport vesicle membrane                               | 2.55 | 0.0039 |
| Vesicle tethering complex                                            | 2.40 | 0.0138 |
| Regulation of cholesterol biosynthetic process                       | 2.39 | 0.0150 |
| Retrograde vesicle mediated transport golgi to endoplasmic reticulum | 2.39 | 0.0151 |
| Regulation of cholesterol biosynthesis by SREBP SREBF                | 2.26 | 0.0407 |

**Figure S3.** Gene set enrichment analysis of genes targeted by sgRNAs showing synthetic lethal interaction with statin treatment. GSEA analysis was performed with the GSEA 4.1.0 software from the Broad Institute using a list of genes ordered based on RANKS score. Shown are gene sets related to vesicular transport and cholesterol homeostasis with NES >2.0 and FDR < 0.05.

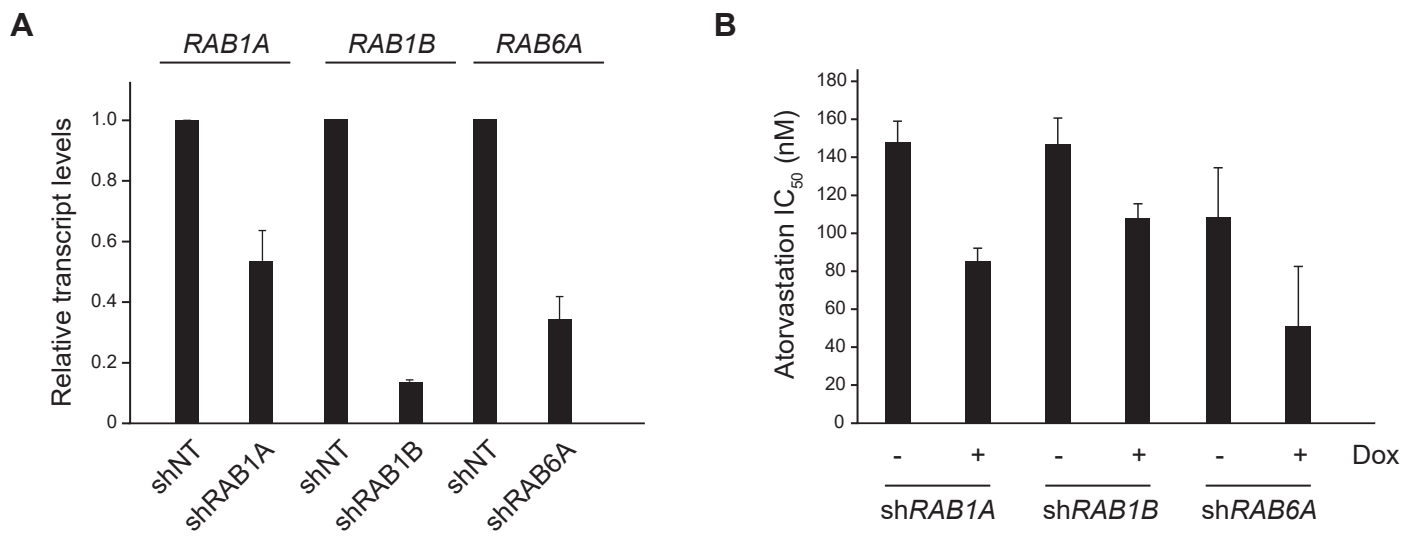

**Figure S4.** A) Knockdown levels achieved in OCI-AML5 cells by shRNAs targeting indicated genes. Results from 3 different shRNAs producing similar knockdown levels are shown for each gene with standard error of the mean. B) Impact of shRNA-mediated silencing of indicated genes on atorvastatin IC<sub>50</sub> in OCI-AML5 cells in the absence of shRNA expression induction (- Dox) or upon shRNA expression induction (+ Dox). The average IC<sub>50</sub> is shown for 3 different shRNAs (A) with standard error of the mean.



Table S1. Clinical annotations for all AML specimens tested.

| Screen # |    |     |       | AML#   | Cytogenetic group   | WHO 2008                                                      | FAB                     | WBC (x10 <sup>9</sup> /l) | Blasts (%) | Age | Sex |
|----------|----|-----|-------|--------|---------------------|---------------------------------------------------------------|-------------------------|---------------------------|------------|-----|-----|
| I        | II | III | Combi |        |                     |                                                               |                         |                           |            |     |     |
|          |    | X   |       | 02H003 | Inter. abn.         | AML with minimal differentiation                              | M0                      | 70                        | 99         | 57  | F   |
|          |    | X   |       | 02H009 | NK                  | AML without maturation                                        | M1                      | 106                       | 82         | 21  | F   |
|          |    |     |       | 02H017 | MLL translocations  | AML with minimal differentiation                              | M0                      | 51.1                      | 96         | 50  | F   |
|          |    | X   |       | 02H033 | MLL translocations  | Acute monoblastic and monocytic leukaemia                     | M5A                     | 65                        | 48         | 67  | M   |
| X        | X  |     |       | 02H060 | Inter. abn.         | AML without maturation                                        | M1                      | 108                       | 92         | 84  | M   |
|          |    | X   |       | 02H066 | NK                  | AML without maturation                                        | M1                      | 125                       | 95         | 53  | F   |
|          |    | X   |       | 03H016 | NK                  | Acute monoblastic and monocytic leukaemia                     | M5A                     | 38                        | 90         | 48  | M   |
|          |    | X   |       | 03H052 | NK                  | Acute monoblastic and monocytic leukaemia                     | M5B                     | 53.8                      | 62         | 57  | M   |
|          |    | X   |       | 03H065 | t(8;21)             | AML with t(8;21)(q22;q22); RUNX1-RUNX1T1                      | M2                      | 12.7                      | 25         | 33  | M   |
|          | X  | X   |       | 03H095 | inv(16)             | AML with inv(16)(p13.1q22) or t(16;16)(p13.1;q22); CBFB-MYH11 | M4Eo                    | 19.3                      | 60         | 17  | F   |
|          | X  | X   |       | 03H109 | inv(16)             | AML with inv(16)(p13.1q22) or t(16;16)(p13.1;q22); CBFB-MYH11 | M4Eo                    | 182                       | 92         | 29  | M   |
|          | X  | X   |       | 03H112 | inv(16)             | AML with inv(16)(p13.1q22) or t(16;16)(p13.1;q22); CBFB-MYH11 | M4Eo                    | 172                       | 80         | 36  | M   |
|          |    | X   |       | 03H116 | NK                  | AML without maturation                                        | M1                      | 223                       | 97         | 55  | F   |
|          |    | X   |       | 03H119 | NK                  | AML without maturation                                        | M1                      | 6.4                       | 92         | 68  | M   |
|          |    | X   |       | 04H024 | NK                  | AML without maturation                                        | M1                      | 231                       | 76         | 45  | F   |
|          |    | X   |       | 04H025 | NK                  | AML without maturation                                        | M1                      | 1.6                       | 69         | 69  | M   |
|          | X  | X   | X     | 04H030 | inv(16)             | AML with inv(16)(p13.1q22) or t(16;16)(p13.1;q22); CBFB-MYH11 | M4Eo                    | 17                        | 50         | 50  | M   |
|          |    | X   |       | 04H041 | MLL translocations  | Acute monoblastic and monocytic leukaemia                     | M5B                     | 17.9                      | 75         | 65  | M   |
|          |    | X   |       | 04H048 | Inter. abn.         | AML with myelodysplasia-related changes                       | M1                      | 14.3                      | 90         | 55  | M   |
|          |    | X   |       | 04H061 | inv(16)             | AML with inv(16)(p13.1q22) or t(16;16)(p13.1;q22); CBFB-MYH11 | M4Eo                    | 32                        | 72         | 69  | F   |
|          |    | X   |       | 04H068 | NK                  | AML with maturation                                           | M2                      | 25.4                      | 80         | 63  | F   |
|          |    | X   |       | 04H078 | NK                  | Acute myeloid leukaemia, NOS                                  | Not classifiable by FAB | 17.2                      | 73         | 68  | M   |
|          |    | X   |       | 04H101 | CK                  | AML with myelodysplasia-related changes                       | Not classifiable by FAB | 15                        | 30         | 67  | M   |
|          |    | X   |       | 04H103 | Inter. abn.         | AML without maturation                                        | M1                      | 152                       | 80         | 64  | M   |
|          | X  | X   | X     | 04H108 | NK                  | AML without maturation                                        | M1                      | 83.6                      | 94         | 70  | F   |
|          |    | X   | X     | 04H112 | NK                  | AML without maturation                                        | M1                      | 361                       | 91         | 64  | F   |
|          | X  | X   | X     | 04H115 | CK                  | AML with myelodysplasia-related changes                       | M5A                     | 1.1                       | 86         | 71  | M   |
|          |    | X   |       | 04H120 | Monosomy 5/5q 7/7q  | AML with myelodysplasia-related changes                       | M1                      | 10.5                      | 90         | 37  | M   |
|          | X  | X   | X     | 04H132 | CK                  | AML with myelodysplasia-related changes                       | M4                      | 161                       | 48         | 46  | M   |
|          |    | X   |       | 04H133 | NK                  | AML without maturation                                        | M1                      | 60.3                      | 91         | 62  | F   |
|          |    | X   |       | 04H135 | Inter. abn.         | AML without maturation                                        | M1                      | 30.8                      | 91         | 78  | M   |
|          |    | X   |       | 04H140 | NK                  | Acute myelomonocytic leukaemia                                | M4                      | 128                       | 80         | 61  | F   |
|          |    | X   |       | 05H008 | NK                  | AML without maturation                                        | M1                      | 327                       | 96         | 26  | F   |
|          |    | X   |       | 05H025 | MLL translocations  | AML with t(9;11)(p22;q23); MLLT3-MLL                          | M5A                     | 71.5                      | 77         | 23  | F   |
|          | X  | X   | X     | 05H030 | NK                  | AML without maturation                                        | M1                      | 90                        | 84         | 55  | F   |
|          |    | X   |       | 05H034 | Monosomy 5/5q 7/7q  | AML with myelodysplasia-related changes                       | M1                      | 290                       | 73         | 47  | M   |
|          | X  | X   |       | 05H042 | t(8;21)             | AML with t(8;21)(q22;q22); RUNX1-RUNX1T1                      | M2                      | 18.2                      | 65         | 37  | M   |
|          |    | X   |       | 05H050 | NK                  | Acute myelomonocytic leukaemia                                | M4                      | 80.6                      | 94         | 61  | M   |
|          |    | X   |       | 05H066 | MLL translocations  | Acute myelomonocytic leukaemia                                | M4                      | 26.6                      | 75         | 26  | F   |
|          | X  | X   |       | 05H094 | NK                  | Acute monoblastic and monocytic leukaemia                     | M5B                     | 98.1                      | 94         | 35  | M   |
|          |    | X   |       | 05H111 | NK                  | AML without maturation                                        | M1                      | 37.9                      | 75         | 56  | M   |
|          | X  | X   | X     | 05H113 | inv(16)             | AML with inv(16)(p13.1q22) or t(16;16)(p13.1;q22); CBFB-MYH11 | M4Eo                    | 20.1                      | 80         | 63  | F   |
|          |    | X   |       | 05H118 | t(8;21)             | AML with t(8;21)(q22;q22); RUNX1-RUNX1T1                      | M2                      | 6.7                       | 38         | 24  | F   |
|          | X  | X   | X     | 05H136 | inv(16)             | AML with inv(16)(p13.1q22) or t(16;16)(p13.1;q22); CBFB-MYH11 | M4Eo                    | 40.5                      | 44         | 66  | M   |
|          |    | X   |       | 05H149 | NK                  | Acute myeloid leukaemia, NOS                                  | M1                      | 30.5                      | 80         | 55  | M   |
|          |    | X   |       | 05H163 | NUP98-NSD1          | AML without maturation                                        | M1                      | 136                       | 86         | 20  | M   |
|          |    | X   |       | 05H181 | NK                  | Acute monoblastic and monocytic leukaemia                     | M5                      | 77.3                      | 80         | 65  | F   |
|          |    | X   |       | 05H184 | t(8;21)             | AML with t(8;21)(q22;q22); RUNX1-RUNX1T1                      | M1                      | 31.3                      | 90         | 48  | M   |
|          |    | X   |       | 05H195 | NK                  | AML without maturation                                        | M1                      | 85.6                      | 95         | 43  | F   |
|          | X  | X   | X     | 06H004 | CK                  | Acute myeloid leukaemia, NOS                                  | Not classifiable by FAB | 321                       | 44         | 59  | F   |
|          |    | X   |       | 06H010 | NK                  | Acute monoblastic and monocytic leukaemia                     | M5                      | 45.5                      | 84         | 59  | F   |
|          |    | X   |       | 06H011 | NK                  | Acute myeloid leukaemia, NOS                                  | Not classifiable by FAB | 44.2                      | 71         | 65  | F   |
|          |    | X   |       | 06H014 | Monosomy 5/5q 7/7q  | AML with myelodysplasia-related changes                       | M2                      | 1.5                       | 40         | 75  | F   |
|          | X  | X   | X     | 06H020 | inv(16)             | AML with inv(16)(p13.1q22) or t(16;16)(p13.1;q22); CBFB-MYH11 | M4Eo                    | 76.7                      | 51         | 40  | M   |
|          |    | X   |       | 06H021 | NK                  | AML with maturation                                           | M2                      | 68.2                      | 55         | 49  | F   |
|          |    | X   |       | 06H028 | NK                  | AML without maturation                                        | M1                      | 282                       | 95         | 70  | F   |
|          |    | X   |       | 06H035 | t(8;21)             | AML with t(8;21)(q22;q22); RUNX1-RUNX1T1                      | Not classifiable by FAB | 94.1                      | 25         | 45  | M   |
|          | X  | X   |       | 06H045 | Inter. abn.         | AML with maturation                                           | M2                      | 16.6                      | 70         | 30  | F   |
|          |    | X   |       | 06H048 | Trisomy/tetrasomy 8 | Acute myelomonocytic leukaemia                                | M4                      | 26                        | 29         | 56  | F   |
|          |    | X   |       | 06H066 | MLL translocations  | AML with myelodysplasia-related changes                       | Not classifiable by FAB | 2.9                       | 82         | 55  | F   |
|          |    | X   |       | 06H073 | MLL translocations  | Acute monoblastic and monocytic leukaemia                     | M5A                     | 7.3                       | 89         | 51  | M   |
|          |    | X   |       | 06H074 | CK                  | AML with myelodysplasia-related changes                       | M5A                     | 16                        | 50         | 67  | M   |
|          |    | X   |       | 06H075 | CK                  | AML with myelodysplasia-related changes                       | M2                      | 1.8                       | 40         | 65  | M   |
|          |    | X   |       | 06H077 | MLL translocations  | Acute myeloid leukaemia, NOS                                  | Not classifiable by FAB | 50                        | 88         | 36  | F   |
|          | X  | X   | X     | 06H088 | MLL translocations  | AML without maturation                                        | M1                      | 32.7                      | 92         | 28  | M   |
|          |    | X   |       | 06H089 | Inter. abn.         | AML without maturation                                        | M1                      | 43.5                      | 79         | 58  | M   |
|          |    | X   |       | 06H115 | inv(16)             | AML with inv(16)(p13.1q22) or t(16;16)(p13.1;q22); CBFB-MYH11 | M2                      | 18                        | 58         | 40  | M   |
|          | X  | X   | X     | 06H117 | MLL translocations  | Acute myelomonocytic leukaemia                                | M4                      | 87.4                      | 85         | 58  | M   |
|          |    | X   |       | 06H143 | Inter. abn.         | Acute myelomonocytic leukaemia                                | M4                      | 153                       | 50         | 73  | M   |
|          |    | X   |       | 06H144 | NK                  | AML without maturation                                        | M1                      | 56.1                      | 90         | 71  | F   |
|          | X  | X   |       | 06H146 | NK                  | AML with maturation                                           | M2                      | 61.9                      | 68         | 45  | M   |

|   |   |   |        |                        |                                                                |                         |      |    |    |   |
|---|---|---|--------|------------------------|----------------------------------------------------------------|-------------------------|------|----|----|---|
|   | X | X | 06H151 | inv(16)                | AML with inv(16)(p13.1;q22) or t(16;16)(p13.1;q22); CBFB-MYH11 | M1                      | 16.7 | 71 | 38 | F |
|   | X | X | 07H003 | MLL translocations     | Acute myelomonocytic leukaemia                                 | M4                      | 46   | 65 | 25 | F |
|   |   | X | 07H019 | Trisomy/tetrasomy 8    | Acute myelomonocytic leukaemia                                 | M4                      | 5.6  | 30 | 68 | M |
|   |   | X | 07H034 | CK                     | Acute erythroid leukaemia                                      | M6A                     | 10   | 18 | 62 | M |
| X | X | X | 07H042 | NK                     | Acute myeloid leukaemia, NOS                                   | Not classifiable by FAB | 88.3 | 83 | 23 | M |
|   | X | X | 07H045 | MLL translocations     | Acute monoblastic and monocytic leukaemia                      | M5A                     | 36.5 | 80 | 31 | F |
|   | X | X | 07H055 | NK                     | Acute monoblastic and monocytic leukaemia                      | M5B                     | 43.7 | 95 | 65 | M |
|   | X | X | 07H062 | NK                     | AML without maturation                                         | M1                      | 172  | 90 | 58 | M |
| X | X | X | 07H069 | Inter. abn.            | Acute myeloid leukaemia, NOS                                   | Not classifiable by FAB | 80   | 85 | 55 | M |
|   | X | X | 07H089 | NK                     | Acute monoblastic and monocytic leukaemia                      | M5                      | 76.5 | 85 | 37 | F |
|   | X | X | 07H095 | NK                     | Acute myelomonocytic leukaemia                                 | M4                      | 55.1 | 59 | 64 | M |
|   | X | X | 07H098 | Inter. abn.            | AML with myelodysplasia-related changes                        | Not classifiable by FAB | 11.4 | 64 | 31 | M |
| X | X | X | 07H099 | inv(16)                | AML with inv(16)(p13.1;q22) or t(16;16)(p13.1;q22); CBFB-MYH11 | Not classifiable by FAB | 61.5 | 82 | 58 | F |
|   |   | X | 07H106 | NK                     | AML with myelodysplasia-related changes                        | M2                      | 14.5 | 61 | 48 | M |
|   |   | X | 07H117 | NK                     | AML with myelodysplasia-related changes                        | M2                      | 31.4 | 60 | 57 | F |
| X | X | X | 07H125 | NK                     | AML without maturation                                         | M1                      | 45.5 | 61 | 66 | F |
|   | X | X | 07H134 | NK                     | Acute monoblastic and monocytic leukaemia                      | M5                      | 53.1 | 81 | 64 | M |
|   | X | X | 07H135 | NK                     | AML without maturation                                         | M1                      | 107  | 97 | 67 | M |
|   |   | X | 07H137 | t(8;21)                | AML with t(8;21)(q22;q22); RUNX1-RUNX1T1                       | M1                      | 23.3 | 92 | 71 | F |
| X | X | X | 07H144 | inv(16)                | AML with inv(16)(p13.1;q22) or t(16;16)(p13.1;q22); CBFB-MYH11 | M4Eo                    | 447  | 74 | 53 | M |
|   |   | X | 07H148 | CK                     | AML with myelodysplasia-related changes                        | M2                      | 27   | 26 | 68 | F |
|   |   | X | 07H156 | CK                     | AML with myelodysplasia-related changes                        | M2                      | 49   | 44 | 62 | M |
|   |   | X | 07H158 | NK                     | AML without maturation                                         | M1                      | 169  | 92 | 67 | M |
| X | X | X | 07H160 | MLL translocations     | AML with myelodysplasia-related changes                        | M1                      | 92.2 | 85 | 67 | F |
|   | X | X | 08H018 | CK                     | AML with myelodysplasia-related changes                        | Not classifiable by FAB | 19.9 | 41 | 65 | M |
|   | X | X | 08H021 | MLL translocations     | AML with t(9;11)(p22;q23); MLLT3-MLL                           | M5A                     | 97.2 | 89 | 60 | M |
|   |   | X | 08H034 | t(8;21)                | AML with t(8;21)(q22;q22); RUNX1-RUNX1T1                       | M1                      | 7.3  | 83 | 28 | F |
| X | X |   | 08H048 | NK                     | AML without maturation                                         | M1                      | 128  | 96 | 45 | M |
|   | X | X | 08H049 | NUP98-NSD1             | Acute monoblastic and monocytic leukaemia                      | M5B                     | 69   | 78 | 69 | M |
|   | X | X | 08H050 | NK                     | AML with myelodysplasia-related changes                        | M2                      | 33.9 | 57 | 45 | M |
|   | X | X | 08H062 | Inter. abn.            | AML with maturation                                            | M2                      | 3.9  | 41 | 54 | F |
|   | X | X | 08H063 | Trisomy/tetrasomy 8    | Acute monoblastic and monocytic leukaemia                      | M5A                     | 76.8 | 83 | 76 | M |
|   | X | X | 08H072 | t(8;21)                | AML with t(8;21)(q22;q22); RUNX1-RUNX1T1                       | M2                      | 63.2 | 37 | 33 | F |
| X | X | X | 08H081 | inv(16)                | AML with inv(16)(p13.1;q22) or t(16;16)(p13.1;q22); CBFB-MYH11 | M4Eo                    | 53.7 | 53 | 39 | F |
|   | X | X | 08H082 | NK                     | AML without maturation                                         | M1                      | 103  | 95 | 43 | F |
|   | X | X | 08H085 | MLL translocations     | Therapy-related myeloid neoplasms                              | M1                      | 268  | 90 | 49 | F |
|   | X | X | 08H089 | NK                     | Acute monoblastic and monocytic leukaemia                      | M5                      | 68.1 | 81 | 68 | M |
|   | X | X | 08H099 | inv(16)                | AML with inv(16)(p13.1;q22) or t(16;16)(p13.1;q22); CBFB-MYH11 | M4Eo                    | 105  | 41 | 75 | M |
|   | X | X | 08H104 | NK                     | Acute monoblastic and monocytic leukaemia                      | M5B                     | 49.3 | 60 | 65 | M |
|   | X | X | 08H108 | Trisomy/tetrasomy 8    | Acute monoblastic and monocytic leukaemia                      | M5A                     | 83.9 | 75 | 72 | M |
| X | X | X | 08H112 | NK                     | AML with myelodysplasia-related changes                        | Not classifiable by FAB | 28.3 | 85 | 52 | M |
|   | X | X | 08H113 | NK                     | AML without maturation                                         | M1                      | 36.6 | 88 | 53 | M |
| X | X | X | 08H118 | EVI1 rearrangements    | AML with myelodysplasia-related changes                        | M0                      | 45.9 | 87 | 73 | F |
|   | X | X | 08H137 | Monosomy 5/5q 7/7q     | AML with myelodysplasia-related changes                        | Not classifiable by FAB | 10.2 | 35 | 78 | F |
|   | X | X | 08H139 | MLL translocations     | Acute monoblastic and monocytic leukaemia                      | M5A                     | 36.5 | 92 | 70 | M |
|   |   | X | 09H002 | NK                     | AML without maturation                                         | M1                      | 82.6 | 94 | 60 | F |
|   |   | X | 09H008 | NK                     | Acute monoblastic and monocytic leukaemia                      | M5A                     | 65.4 | 58 | 67 | M |
|   |   | X | 09H010 | MLL translocations     | AML with t(9;11)(p22;q23); MLLT3-MLL                           | M5A                     | 1.8  | 93 | 20 | M |
|   |   | X | 09H013 | NK                     | AML with myelodysplasia-related changes                        | M4                      | 16.6 | 60 | 50 | M |
|   | X | X | 09H016 | inv(16)                | AML with inv(16)(p13.1;q22) or t(16;16)(p13.1;q22); CBFB-MYH11 | M4Eo                    | 61.7 | 66 | 64 | F |
| X | X | X | 09H018 | MLL translocations     | AML with myelodysplasia-related changes                        | M0                      | 102  | 86 | 56 | M |
|   |   | X | 09H022 | Inter. abn.            | AML without maturation                                         | M1                      | 21.1 | 88 | 45 | F |
| X | X |   | 09H031 | NK                     | AML without maturation                                         | M1                      | 48.9 | 85 | 54 | F |
|   |   | X | 09H032 | MLL translocations     | AML with t(9;11)(p22;q23); MLLT3-MLL                           | M5A                     | 50   | 94 | 54 | M |
|   |   | X | 09H040 | t(8;21)                | AML with t(8;21)(q22;q22); RUNX1-RUNX1T1                       | M1                      | 26.5 | 60 | 35 | M |
|   |   | X | 09H042 | NK                     | Acute monoblastic and monocytic leukaemia                      | M5B                     | 223  | 75 | 52 | F |
|   |   | X | 09H043 | NK                     | AML without maturation                                         | M1                      | 33.2 | 80 | 53 | M |
| X | X |   | 09H046 | Monosomy17/del17p      | Therapy-related myeloid neoplasms                              | Not classifiable by FAB | 52   | 77 | 37 | M |
| X | X | X | 09H054 | CK                     | AML with myelodysplasia-related changes                        | Not classifiable by FAB | 80.3 | 63 | 54 | F |
|   |   | X | 09H057 | CK                     | AML with myelodysplasia-related changes                        | Not classifiable by FAB | 31.4 | 60 | 62 | M |
|   |   | X | 09H058 | NK                     | AML with maturation                                            | M2                      | 63.1 | 74 | 71 | F |
|   | X | X | 09H066 | inv(16)                | AML with inv(16)(p13.1;q22) or t(16;16)(p13.1;q22); CBFB-MYH11 | M4                      | 20.7 | 64 | 68 | M |
|   |   | X | 09H078 | CK                     | AML with myelodysplasia-related changes                        | M1                      | 4.7  | 34 | 58 | F |
|   |   | X | 09H083 | NK                     | AML without maturation                                         | M1                      | 65.3 | 94 | 63 | F |
|   |   | X | 09H088 | Inter. abn.            | AML without maturation                                         | M1                      | 7.1  | 81 | 43 | F |
|   |   | X | 09H094 | Inter. abn.            | AML with myelodysplasia-related changes                        | Not classifiable by FAB | 42.4 | 76 | 68 | F |
|   | X | X | 09H106 | NK                     | Acute monoblastic and monocytic leukaemia                      | M5B                     | 90   | 81 | 74 | M |
|   |   | X | 09H111 | NK                     | Acute monoblastic and monocytic leukaemia                      | M5B                     | 46.8 | 80 | 59 | F |
| X | X | X | 09H113 | NK                     | AML without maturation                                         | M1                      | 68.7 | 95 | 56 | M |
|   |   | X | 10H001 | Inter. abn.            | AML with myelodysplasia-related changes                        | M2                      | 3.8  | 60 | 29 | M |
|   | X | X | 10H007 | Hyperdiploid numerical | Acute myelomonocytic leukaemia                                 | M4                      | 32.5 | 68 | 63 | F |
| X | X | X | 10H008 | inv(16)                | AML with inv(16)(p13.1;q22) or t(16;16)(p13.1;q22); CBFB-MYH11 | M4Eo                    | 75.8 | 60 | 37 | M |
|   | X | X | 10H014 | CK                     | AML with myelodysplasia-related changes                        | M0                      | 1.3  | 72 | 77 | M |
|   | X | X | 10H026 | NK                     | Acute monoblastic and monocytic leukaemia                      | M5                      | 103  | 85 | 56 | F |
|   |   | X | 10H030 | t(8;21)                | AML with t(8;21)(q22;q22); RUNX1-RUNX1T1                       | M2                      | 4.3  | 32 | 59 | M |
|   | X | X | 10H031 | MLL translocations     | Acute monoblastic and monocytic leukaemia                      | M5B                     | 202  | 73 | 25 | F |
|   |   | X | 10H034 | CK                     | AML with myelodysplasia-related changes                        | M2                      | 15.1 | 38 | 65 | M |
|   |   | X | 10H038 | NUP98-NSD1             | AML with minimal differentiation                               | M0                      | 148  | 91 | 67 | F |
|   |   | X | 10H040 | Inter. abn.            | AML with myelodysplasia-related changes                        | M1                      | 4.3  | 78 | 68 | M |

|   |   |   |        |                     |                                                               |                         |      |    |    |   |
|---|---|---|--------|---------------------|---------------------------------------------------------------|-------------------------|------|----|----|---|
|   |   | X | 10H051 | CK                  | AML with myelodysplasia-related changes                       | Not classifiable by FAB | 1.5  | 30 | 39 | M |
|   |   | X | 10H056 | NK                  | AML without maturation                                        | M5B                     | 6.3  | 83 | 57 | F |
|   |   | X | 10H063 | EV11 rearrangements | AML with myelodysplasia-related changes                       | M4                      | 138  | 40 | 41 | F |
|   |   | X | 10H072 | NK                  | Acute monoblastic and monocytic leukaemia                     | M5                      | 23.5 | 77 | 69 | M |
|   |   | X | 10H078 | CK                  | Acute myelomonocytic leukaemia                                | M4                      | 124  | 30 | 66 | M |
|   |   | X | 10H089 | NK                  | Acute myeloid leukaemia, NOS                                  | Not classifiable by FAB | 4    | 80 | 49 | F |
|   |   | X | 10H092 | NK                  | AML without maturation                                        | M1                      | 81.7 | 90 | 69 | F |
|   | X | X | 10H095 | NK                  | AML without maturation                                        | M1                      | 52   | 91 | 65 | F |
|   | X | X | 10H101 | NK                  | AML with myelodysplasia-related changes                       | M2                      | 24.5 | 70 | 49 | F |
| X | X | X | 10H109 | Inter. abn.         | AML without maturation                                        | M1                      | 318  | 94 | 65 | F |
|   |   | X | 10H119 | t(8;21)             | AML with t(8;21)(q22;q22); RUNX1-RUNX1T1                      | M2                      | 19.7 | 35 | 36 | M |
|   |   | X | 10H127 | MLL translocations  | AML with t(9;11)(p22;q23); MLLT3-MLL                          | M5A                     | 162  | 92 | 36 | M |
|   | X | X | 10H166 | NK                  | Acute myeloid leukaemia, NOS                                  | Not classifiable by FAB | 226  | 89 | 63 | M |
|   |   | X | 10H173 | Inter. abn.         | Acute myeloid leukaemia, NOS                                  | Not classifiable by FAB | 5.8  | 68 | 74 | M |
|   |   | X | 10H174 | CK                  | AML with myelodysplasia-related changes                       | M4                      | 113  | 70 | 59 | F |
|   | X | X | 11H006 | NK                  | Acute monoblastic and monocytic leukaemia                     | M5A                     | 33   | 94 | 26 | F |
| X | X |   | 11H008 | Inter. abn.         | AML with myelodysplasia-related changes                       | Not classifiable by FAB | 86.2 | 75 | 76 | M |
|   |   | X | 11H017 | CK                  | AML with myelodysplasia-related changes                       | Not classifiable by FAB | 20.3 | 56 | 35 | M |
|   | X | X | 11H022 | inv(16)             | AML with inv(16)(p13.1q22) or t(16;16)(p13.1;q22); CBFB-MYH11 | M4Eo                    | 35.8 | 43 | 47 | F |
|   |   | X | 11H058 | NK                  | AML without maturation                                        | M1                      | 1.6  | 90 | 58 | M |
|   |   | X | 11H072 | NK                  | AML with maturation                                           | M2                      | 32.2 | 80 | 52 | F |
|   |   | X | 11H083 | NK                  | Acute monoblastic and monocytic leukaemia                     | M5A                     | 77.1 | 80 | 52 | M |
|   |   | X | 11H103 | CK                  | AML with myelodysplasia-related changes                       | M1                      | 11.5 | 70 | 65 | M |
|   | X | X | 11H104 | inv(16)             | AML with inv(16)(p13.1q22) or t(16;16)(p13.1;q22); CBFB-MYH11 | M4Eo                    | 9.6  | 63 | 56 | M |
|   |   | X | 11H126 | NK                  | Acute monoblastic and monocytic leukaemia                     | M5B                     | 12.9 | 68 | 74 | M |
| X | X | X | 11H129 | Inter. abn.         | AML without maturation                                        | M1                      | 323  | 95 | 62 | M |
|   |   | X | 11H140 | CK                  | AML with myelodysplasia-related changes                       | M2                      | 5    | 36 | 54 | F |
| X | X | X | 11H151 | NK                  | AML without maturation                                        | M1                      | 53.3 | 78 | 61 | M |
|   |   | X | 11H157 | NK                  | Acute myelomonocytic leukaemia                                | M4                      | 56.7 | 70 | 62 | M |
|   | X | X | 11H160 | NUP98-NSD1          | Acute myelomonocytic leukaemia                                | M4                      | 207  | 65 | 36 | F |
|   |   | X | 11H170 | CK                  | AML with myelodysplasia-related changes                       | M0                      | 50.5 | 94 | 51 | F |
|   |   | X | 11H177 | CK                  | AML with myelodysplasia-related changes                       | Not classifiable by FAB | 4.4  | 34 | 74 | F |
|   | X | X | 11H179 | inv(16)             | AML with inv(16)(p13.1q22) or t(16;16)(p13.1;q22); CBFB-MYH11 | M4Eo                    | 16.4 | 47 | 22 | M |
|   |   | X | 11H187 | CK                  | AML with myelodysplasia-related changes                       | Not classifiable by FAB | 2    | 60 | 87 | F |
|   |   | X | 11H192 | Inter. abn.         | Acute monoblastic and monocytic leukaemia                     | M5A                     | 17.4 | 84 | 68 | M |
|   |   | X | 11H217 | Inter. abn.         | AML with myelodysplasia-related changes                       | Not classifiable by FAB | 13.9 | 70 | 63 | M |
|   |   | X | 11H231 | NK                  | Acute myeloid leukaemia, NOS                                  | Not classifiable by FAB | 7.7  | 80 | 50 | M |
|   |   | X | 11H234 | NK                  | AML with maturation                                           | M2                      | 61.2 | 55 | 44 | M |
|   |   | X | 12H007 | NK                  | AML with myelodysplasia-related changes                       | Not classifiable by FAB | 67.2 | 71 | 27 | F |
|   | X |   | 12H010 | NK                  | Acute myeloid leukaemia, NOS                                  | M1                      | 60.7 | 85 | 65 | M |
|   |   | X | 12H021 | NK                  | AML without maturation                                        | M1                      | 13.6 | 82 | 59 | M |
| X | X |   | 12H030 | Inter. abn.         | AML with minimal differentiation                              | M0                      | 160  | 93 | 78 | M |
|   |   | X | 12H039 | Inter. abn.         | AML without maturation                                        | M1                      | 16.4 | 84 | 63 | M |
|   | X | X | 12H042 | inv(16)             | AML with inv(16)(p13.1q22) or t(16;16)(p13.1;q22); CBFB-MYH11 | M4Eo                    | 108  | 76 | 58 | M |
|   |   | X | 12H044 | inv(16)             | AML with inv(16)(p13.1q22) or t(16;16)(p13.1;q22); CBFB-MYH11 | M4                      | 97   | 56 | 75 | F |
|   |   | X | 12H055 | CK                  | AML with myelodysplasia-related changes                       | Not classifiable by FAB | 7.2  | 79 | 22 | M |
|   |   | X | 12H056 | NK                  | AML without maturation                                        | M1                      | 48.7 | 89 | 62 | M |
|   |   | X | 12H091 | NK                  | AML without maturation                                        | M1                      | 15   | 81 | 62 | F |
|   | X | X | 12H165 | inv(16)             | AML with inv(16)(p13.1q22) or t(16;16)(p13.1;q22); CBFB-MYH11 | Not classifiable by FAB | 59.3 | 65 | 56 | M |
|   |   | X | 12H170 | CK                  | AML with myelodysplasia-related changes                       | Not classifiable by FAB | 10.3 | 57 | 60 | F |
|   |   | X | 12H171 | NK                  | AML without maturation                                        | M1                      | 86.7 | 95 | 67 | F |
|   |   | X | 12H173 | Inter. abn.         | AML without maturation                                        | M1                      | 206  | 97 | 66 | F |
| X |   |   | 12H175 | NK                  | AML without maturation                                        | M1                      | 171  | 96 | 59 | F |
|   |   | X | 12H180 | t(8;21)             | AML with t(8;21)(q22;q22); RUNX1-RUNX1T1                      | M2                      | 7.3  | 48 | 38 | M |
|   |   | X | 13H046 | NK                  | Acute myelomonocytic leukaemia                                | M4                      | 31   | 38 | 52 | F |
|   |   | X | 13H053 | NK                  | Acute myelomonocytic leukaemia                                | M4                      | 19.8 | 80 | 60 | F |
|   |   | X | 13H058 | NK                  | AML with maturation                                           | M2                      | 74   | 80 | 44 | M |
|   |   | X | 13H065 | Inter. abn.         | Acute myeloid leukaemia, NOS                                  | Not classifiable by FAB | 24.2 | 44 | 70 | M |
| X | X | X | 13H066 | inv(16)             | AML with inv(16)(p13.1q22) or t(16;16)(p13.1;q22); CBFB-MYH11 | M4Eo                    | 21.5 | 46 | 24 | F |
| X |   |   | 13H073 | NK                  | AML without maturation                                        | M1                      | 357  | 97 | 87 | F |
|   |   | X | 13H080 | Inter. abn.         | AML without maturation                                        | M1                      | 11.3 | 88 | 74 | F |
|   |   | X | 13H110 | NK                  | Acute myelomonocytic leukaemia                                | M4                      | 16.9 | 64 | 70 | F |
|   |   | X | 13H114 | NK                  | AML with myelodysplasia-related changes                       | Not classifiable by FAB | 68.4 | 83 | 58 | M |
|   |   | X | 13H120 | inv(16)             | AML with inv(16)(p13.1q22) or t(16;16)(p13.1;q22); CBFB-MYH11 | M4Eo                    | 54.7 | 25 | 35 | M |
|   |   | X | 13H139 | Inter. abn.         | AML without maturation                                        | M1                      | 36.9 | 94 | 58 | M |
|   |   | X | 13H150 | CK                  | AML without maturation                                        | M1                      | 62   | 87 | 60 | M |
|   |   | X | 13H185 | Inter. abn.         | Acute monoblastic and monocytic leukaemia                     | M5A                     | 14.9 | 77 | 68 | M |
|   |   | X | 13H186 | Inter. abn.         | Acute myelomonocytic leukaemia                                | M4                      | 5.2  | 50 | 66 | M |
|   |   | X | 14H007 | NK                  | AML with maturation                                           | M2                      | 85.7 | 80 | 53 | F |
|   |   | X | 14H012 | Inter. abn.         | AML with minimal differentiation                              | M0                      | 9.1  | 82 | 65 | M |
|   |   | X | 14H015 | NK                  | Acute myelomonocytic leukaemia                                | M4                      | 15.8 | 45 | 46 | F |
|   |   | X | 14H017 | Inter. abn.         | AML without maturation                                        | M1                      | 6.1  | 86 | 60 | F |
|   |   | X | 14H019 | NK                  | AML with minimal differentiation                              | M0                      | 19.5 | 96 | 42 | M |
|   |   | X | 14H020 | NK                  | AML without maturation                                        | M1                      | 7    | 88 | 49 | F |
|   |   | X | 14H038 | EV11 rearrangements | AML with inv(3)(q21q26.2) or t(3;3)(q21;q26.2); RPN1-EV11     | Not classifiable by FAB | 5.8  | 28 | 49 | M |

Inter.abn., intermediate abnormal karyotype with and without trisomy 8; CK, complex karyotype; NK, normal karyotype;WHO 2008, World Health Organization classification 2008; FAB, french-american-british classification; Prava, pravastatin response assays; Combi, cytarabine dose response assays in the presence of 20 nM atorvastatin

**Table S2. Percent inhibition of cell viability achieved by 2.5µM atorvastatin and pravastatin for indicated specimens**

| AML#   | % inhibition             |                         |
|--------|--------------------------|-------------------------|
|        | Atorvastatin<br>(2.5 µM) | Pravastatin<br>(2.5 µM) |
| 03H095 | 84.2                     | 3.5                     |
| 03H109 | 96.6                     | 5.5                     |
| 03H112 | 98.5                     | 3.4                     |
| 04H030 | 98.5                     | 16.7                    |
| 05H113 | 83.8                     | 50.8                    |
| 05H136 | 72.2                     | 2.0                     |
| 06H020 | 93.8                     | 26.2                    |
| 06H115 | 99.0                     | 60.3                    |
| 06H151 | 64.1                     | 1.0                     |
| 07H099 | 97.4                     | 17.2                    |
| 07H144 | 98.4                     | 18.9                    |
| 08H081 | 99.2                     | 59.5                    |
| 08H099 | 99.1                     | 37.6                    |
| 09H066 | 63.4                     | 14.3                    |
| 10H008 | 97.4                     | 16.8                    |
| 11H022 | 98.4                     | 22.4                    |
| 11H104 | 96.6                     | 20.1                    |
| 11H179 | 96.6                     | 27.9                    |
| 12H042 | 90.8                     | 19.5                    |
| 12H165 | 96.7                     | 22.0                    |
| 13H066 | 98.0                     | 35.6                    |
| 05H042 | 96.4                     | 28.2                    |
| 08H072 | 84.5                     | 11.6                    |
| 04H108 | 83.1                     | 18.6                    |
| 05H030 | 57.1                     | 3.0                     |
| 05H094 | 87.4                     | 4.8                     |
| 05H149 | 89.3                     | 7.8                     |
| 06H021 | 58.8                     | 1.8                     |
| 06H146 | 70.2                     | 7.0                     |
| 07H042 | 79.9                     | 7.8                     |
| 07H062 | 67.8                     | 2.7                     |
| 07H095 | 94.6                     | 18.8                    |
| 07H125 | 62.5                     | 2.6                     |
| 08H048 | 95.2                     | 48.4                    |
| 08H050 | 98.1                     | 21.4                    |
| 08H082 | 69.1                     | 24.9                    |
| 08H089 | 74.6                     | 13.8                    |
| 08H112 | 43.5                     | 2.4                     |
| 08H113 | 92.4                     | 7.5                     |
| 09H031 | 87.3                     | 6.1                     |
| 09H106 | 96.6                     | 29.8                    |
| 09H113 | 66.2                     | 11.8                    |
| 10H026 | 90.5                     | 26.3                    |
| 10H095 | 35.2                     | 1.0                     |
| 10H166 | 74.9                     | 14.2                    |
| 11H008 | 95.3                     | 50.5                    |
| 11H151 | 94.9                     | 4.1                     |
| 12H010 | 53.2                     | 0.8                     |
| 12H175 | 94.6                     | 33.2                    |
| 13H073 | 89.2                     | 0.1                     |
| 04H115 | 81.0                     | 29.2                    |
| 04H132 | 52.5                     | 3.2                     |
| 06H004 | 96.8                     | 56.5                    |
| 08H018 | 97.9                     | 37.9                    |
| 09H054 | 75.4                     | 11.4                    |
| 10H014 | 50.3                     | 7.2                     |
| 06H088 | 90.3                     | 16.5                    |
| 06H117 | 83.5                     | 3.1                     |
| 07H003 | 76.0                     | 4.0                     |
| 07H045 | 41.2                     | 13.8                    |
| 07H160 | 91.3                     | 6.1                     |
| 08H021 | 89.2                     | 32.4                    |
| 08H085 | 92.6                     | 65.7                    |
| 08H139 | 67.7                     | 14.8                    |
| 09H018 | 70.8                     | 14.7                    |
| 02H060 | 94.7                     | 0.7                     |
| 06H045 | 95.1                     | 69.0                    |
| 06H143 | 84.2                     | 11.7                    |
| 07H069 | 85.0                     | 3.3                     |
| 08H062 | 96.6                     | 43.4                    |
| 08H108 | 88.5                     | 5.2                     |
| 10H109 | 95.0                     | 7.5                     |
| 11H006 | 74.2                     | 13.1                    |
| 11H129 | 99.9                     | 75.1                    |
| 12H030 | 95.2                     | 62.9                    |
| 08H118 | 86.4                     | 7.8                     |
| 11H160 | 89.2                     | 23.6                    |
| 09H046 | 92.3                     | 10.3                    |

**Table S3. IC50 of indicated statins for inhibition of cell viability of indicated specimens.**

| <b>AML#</b> | <b>Cytogenetic group</b> | <b>Atorvastatin IC50</b> | <b>Rosuvastatin IC50</b> | <b>Fluvastatin IC50</b> | <b>Simvastatin IC50</b> |
|-------------|--------------------------|--------------------------|--------------------------|-------------------------|-------------------------|
| 02H033      | CK                       | 28.69                    | 60.10                    | 32.96                   | 261.16                  |
| 04H101      | CK                       | 254.34                   | 680.87                   | 38.91                   | 501.99                  |
| 04H115      | CK                       | 708.92                   | 1289.97                  | 219.71                  | 1526.25                 |
| 04H132      | CK                       | 2134.45                  | 4954.46                  | 499.95                  | 3066.30                 |
| 06H004      | CK                       | 38.92                    | 128.59                   | 14.31                   | 193.94                  |
| 06H074      | CK                       | 11.18                    | 88.38                    | 26.60                   | 191.36                  |
| 06H075      | CK                       | 757.89                   | 1739.56                  | 162.96                  | 1377.37                 |
| 07H034      | CK                       | 2002.83                  | 6294.54                  | 451.03                  | 3008.36                 |
| 07H148      | CK                       | 712.70                   | 1746.91                  | 139.20                  | 851.90                  |
| 07H156      | CK                       | 211.24                   | 577.01                   | 43.65                   | 543.54                  |
| 09H054      | CK                       | 3537.20                  | 9499.14                  | 1737.46                 | 8132.80                 |
| 09H057      | CK                       | 3011.77                  | 8345.57                  | 592.67                  | 3297.64                 |
| 09H078      | CK                       | 1127.38                  | 3332.61                  | 251.01                  | 2307.50                 |
| 10H007      | CK                       | 546.35                   | 1203.97                  | 113.93                  | 1016.61                 |
| 10H014      | CK                       | 1169.60                  | 3051.73                  | 387.98                  | 2546.99                 |
| 10H034      | CK                       | 782.40                   | 1811.15                  | 301.08                  | 1797.21                 |
| 10H051      | CK                       | 108.23                   | 267.11                   | 38.66                   | 278.38                  |
| 10H078      | CK                       | 23.74                    | 307.81                   | 35.03                   | 79.04                   |
| 10H174      | CK                       | 1199.71                  | 3352.21                  | 373.71                  | 2284.12                 |
| 11H017      | CK                       | 76.28                    | 176.37                   | 15.75                   | 180.67                  |
| 11H103      | CK                       | 177.00                   | 861.73                   | 38.72                   | 100.38                  |
| 11H140      | CK                       | 7877.92                  | 12792.65                 | 1357.41                 | 8843.06                 |
| 11H170      | CK                       | 2095.49                  | 4998.95                  | 676.75                  | 2364.55                 |
| 11H177      | CK                       | 95.86                    | 272.96                   | 26.61                   | 241.20                  |
| 11H187      | CK                       | 1615.44                  | 3976.74                  | 273.04                  | 2344.19                 |
| 12H055      | CK                       | 75.09                    | 202.66                   | 93.10                   | 476.42                  |
| 12H170      | CK                       | 11140.94                 | 20000.00                 | 2446.38                 | 9519.01                 |
| 13H150      | CK                       | 598.71                   | 1179.34                  | 164.68                  | 997.58                  |
| 08H118      | EVI1 rearrangements      | 2087.97                  | 5444.92                  | 432.09                  | 2538.79                 |
| 10H063      | EVI1 rearrangements      | 2189.92                  | 6668.38                  | 691.36                  | 4834.41                 |
| 14H038      | EVI1 rearrangements      | 991.03                   | 2019.66                  | 181.43                  | 1602.82                 |
| 02H003      | Intermediate abnormal    | 684.31                   | 4141.93                  | 688.58                  | 2125.94                 |
| 04H048      | Intermediate abnormal    | 36.42                    | 129.48                   | 9.92                    | 117.00                  |
| 04H103      | Intermediate abnormal    | 1226.82                  | 2610.59                  | 387.57                  | 2717.54                 |
| 04H135      | Intermediate abnormal    | 1891.61                  | 3900.69                  | 534.41                  | 4412.95                 |
| 06H073      | Intermediate abnormal    | 1622.42                  | 5861.90                  | 1031.21                 | 6260.12                 |
| 06H089      | Intermediate abnormal    | 780.95                   | 1888.19                  | 163.88                  | 1664.29                 |
| 07H069      | Intermediate abnormal    | 633.43                   | 980.91                   | 168.73                  | 1312.13                 |

|        |                       |          |          |          |          |
|--------|-----------------------|----------|----------|----------|----------|
| 08H062 | Intermediate abnormal | 306.06   | 1125.74  | 145.16   | 335.44   |
| 09H022 | Intermediate abnormal | 1736.34  | 4265.30  | 469.24   | 3220.76  |
| 09H088 | Intermediate abnormal | 237.46   | 970.14   | 91.25    | 746.25   |
| 09H094 | Intermediate abnormal | 1920.74  | 6213.12  | 403.26   | 2052.86  |
| 10H001 | Intermediate abnormal | 469.38   | 1082.08  | 102.17   | 862.84   |
| 10H040 | Intermediate abnormal | 27.40    | 81.61    | 9.83     | 101.29   |
| 10H109 | Intermediate abnormal | 589.67   | 1332.55  | 187.63   | 1072.78  |
| 10H173 | Intermediate abnormal | 580.68   | 1213.98  | 196.46   | 1144.85  |
| 11H129 | Intermediate abnormal | 16.59    | 60.21    | 7.78     | 69.01    |
| 11H192 | Intermediate abnormal | 268.33   | 667.84   | 95.65    | 685.26   |
| 11H217 | Intermediate abnormal | 4459.42  | 9459.57  | 812.36   | 4588.67  |
| 12H039 | Intermediate abnormal | 1769.34  | 5621.82  | 550.63   | 3057.91  |
| 12H173 | Intermediate abnormal | 1132.79  | 2575.49  | 405.97   | 3044.73  |
| 13H065 | Intermediate abnormal | 1250.67  | 3257.16  | 156.34   | 845.28   |
| 13H080 | Intermediate abnormal | 98.92    | 275.47   | 47.63    | 283.27   |
| 13H139 | Intermediate abnormal | 662.45   | 3445.99  | 172.19   | 796.59   |
| 13H185 | Intermediate abnormal | 15.24    | 26.62    | 9.06     | 56.52    |
| 13H186 | Intermediate abnormal | 382.68   | 1122.32  | 108.14   | 694.24   |
| 14H012 | Intermediate abnormal | 8.36     | 18.25    | 11.90    | 110.88   |
| 14H017 | Intermediate abnormal | 20000.00 | 20000.00 | 20000.00 | 20000.00 |
| 03H095 | inv(16)               | 42.16    | 86.47    | 24.59    | 273.69   |
| 03H109 | inv(16)               | 81.37    | 355.60   | 39.12    | 87.99    |
| 03H112 | inv(16)               | 103.68   | 318.30   | 33.53    | 217.57   |
| 04H030 | inv(16)               | 295.94   | 767.44   | 107.71   | 628.04   |
| 04H061 | inv(16)               | 129.50   | 376.07   | 44.92    | 427.16   |
| 05H113 | inv(16)               | 11.80    | 45.12    | 1.77     | 33.54    |
| 05H136 | inv(16)               | 221.26   | 590.85   | 70.23    | 661.86   |
| 06H020 | inv(16)               | 406.33   | 912.48   | 162.97   | 1437.71  |
| 06H115 | inv(16)               | 64.94    | 213.64   | 28.77    | 231.95   |
| 06H151 | inv(16)               | 133.63   | 565.24   | 35.10    | 119.44   |
| 07H099 | inv(16)               | 96.66    | 299.27   | 29.04    | 301.61   |
| 07H144 | inv(16)               | 289.64   | 674.44   | 117.01   | 964.00   |
| 08H081 | inv(16)               | 15.06    | 45.08    | 6.76     | 82.48    |
| 08H099 | inv(16)               | 198.92   | 664.57   | 78.75    | 429.84   |
| 09H016 | inv(16)               | 214.62   | 655.86   | 80.36    | 507.58   |
| 09H066 | inv(16)               | 192.18   | 476.10   | 75.61    | 658.22   |
| 10H008 | inv(16)               | 22.04    | 75.14    | 10.50    | 102.65   |
| 11H022 | inv(16)               | 13.69    | 26.41    | 10.51    | 104.81   |
| 11H104 | inv(16)               | 17.07    | 56.12    | 4.98     | 43.82    |
| 11H179 | inv(16)               | 238.07   | 617.72   | 69.27    | 535.23   |
| 12H042 | inv(16)               | 83.60    | 265.38   | 32.23    | 249.18   |
| 12H044 | inv(16)               | 160.48   | 361.28   | 42.10    | 369.86   |
| 12H165 | inv(16)               | 357.19   | 858.61   | 151.16   | 901.61   |
| 13H066 | inv(16)               | 16.56    | 61.04    | 8.19     | 101.56   |
| 13H120 | inv(16)               | 108.92   | 373.64   | 40.99    | 373.91   |
| 04H041 | MLL                   | 849.32   | 2164.33  | 349.28   | 2292.54  |

|        |                       |         |          |         |         |
|--------|-----------------------|---------|----------|---------|---------|
| 05H025 | MLL                   | 224.29  | 1212.49  | 348.10  | 856.05  |
| 05H066 | MLL                   | 2017.50 | 6230.12  | 661.94  | 2165.68 |
| 06H066 | MLL                   | 86.25   | 187.58   | 12.28   | 173.10  |
| 06H117 | MLL                   | 676.52  | 1615.90  | 253.26  | 1838.92 |
| 07H045 | MLL                   | 127.58  | 343.15   | 64.27   | 327.64  |
| 07H160 | MLL                   | 5749.51 | 16383.19 | 2046.72 | 8913.05 |
| 08H021 | MLL                   | 47.79   | 116.89   | 24.66   | 195.74  |
| 08H139 | MLL                   | 661.56  | 1589.46  | 463.81  | 2563.74 |
| 09H032 | MLL                   | 392.96  | 1063.90  | 265.00  | 1563.53 |
| 10H031 | MLL                   | 133.83  | 467.20   | 122.52  | 719.21  |
| 10H127 | MLL                   | 211.00  | 541.46   | 138.22  | 721.02  |
| 09H010 | MLL translocations    | 1165.27 | 3183.86  | 868.38  | 3139.04 |
| 09H018 | MLL translocations    | 2802.70 | 7132.60  | 700.14  | 3312.34 |
| 04H120 | Mono 5/5q- Mono 7/7q- | 77.91   | 151.02   | 13.93   | 182.00  |
| 05H034 | Mono 5/5q- Mono 7/7q- | 344.02  | 784.42   | 59.33   | 673.12  |
| 06H014 | Mono 5/5q- Mono 7/7q- | 421.37  | 2557.97  | 135.03  | 633.63  |
| 08H137 | Mono 5/5q- Mono 7/7q- | 3005.64 | 10946.63 | 770.46  | 3282.25 |
| 02H009 | NK                    | 632.39  | 2087.16  | 151.53  | 996.72  |
| 02H066 | NK                    | 641.17  | 1875.67  | 242.47  | 1381.90 |
| 03H016 | NK                    | 294.80  | 789.99   | 88.69   | 845.41  |
| 03H052 | NK                    | 173.71  | 429.50   | 114.66  | 705.81  |
| 03H116 | NK                    | 348.24  | 789.14   | 140.50  | 1418.73 |
| 03H119 | NK                    | 9.10    | 20.45    | 2.55    | 76.57   |
| 04H024 | NK                    | 633.19  | 1366.94  | 189.37  | 1376.27 |
| 04H025 | NK                    | 510.25  | 1876.42  | 238.31  | 2030.74 |
| 04H068 | NK                    | 110.51  | 537.84   | 99.39   | 364.74  |
| 04H078 | NK                    | 608.81  | 1489.55  | 213.99  | 1607.52 |
| 04H108 | NK                    | 929.67  | 2845.05  | 401.13  | 2109.85 |
| 04H112 | NK                    | 1327.27 | 3821.05  | 273.92  | 2267.68 |
| 04H133 | NK                    | 154.36  | 399.38   | 26.85   | 414.96  |
| 04H140 | NK                    | 393.15  | 916.46   | 95.55   | 1118.71 |
| 05H008 | NK                    | 33.46   | 67.38    | 7.02    | 96.55   |
| 05H030 | NK                    | 2040.71 | 6645.68  | 558.00  | 3154.48 |
| 05H050 | NK                    | 183.98  | 447.51   | 38.73   | 488.07  |
| 05H094 | NK                    | 247.64  | 649.79   | 152.19  | 853.92  |
| 05H111 | NK                    | 4831.76 | 13414.91 | 1210.52 | 5781.44 |
| 05H163 | NK                    | 23.75   | 41.25    | 2.17    | 77.11   |
| 05H195 | NK                    | 2254.79 | 6755.45  | 443.33  | 3053.75 |
| 06H010 | NK                    | 1384.04 | 3527.54  | 335.82  | 1954.19 |
| 06H011 | NK                    | 756.15  | 2025.10  | 223.18  | 1565.52 |
| 06H021 | NK                    | 1034.12 | 3266.07  | 287.93  | 1696.63 |
| 06H028 | NK                    | 140.04  | 337.26   | 41.87   | 414.38  |
| 06H144 | NK                    | 3532.45 | 8445.40  | 994.45  | 7369.70 |
| 06H146 | NK                    | 1867.44 | 5679.00  | 560.31  | 3720.37 |
| 07H042 | NK                    | 362.73  | 984.68   | 100.88  | 873.95  |
| 07H055 | NK                    | 84.32   | 251.23   | 35.74   | 355.43  |
| 07H062 | NK                    | 929.41  | 3036.59  | 220.62  | 1447.67 |

|        |    |         |          |         |          |
|--------|----|---------|----------|---------|----------|
| 07H089 | NK | 503.76  | 1739.94  | 117.39  | 1026.00  |
| 07H095 | NK | 365.57  | 919.03   | 102.47  | 897.48   |
| 07H106 | NK | 680.37  | 1993.40  | 166.46  | 1220.01  |
| 07H117 | NK | 395.57  | 1048.08  | 186.16  | 1363.40  |
| 07H125 | NK | 1722.89 | 5533.79  | 418.07  | 2229.64  |
| 07H134 | NK | 536.61  | 1100.25  | 184.56  | 1275.77  |
| 07H135 | NK | 9880.04 | 20000.00 | 4403.42 | 13485.36 |
| 07H158 | NK | 286.80  | 666.61   | 106.85  | 823.43   |
| 08H049 | NK | 458.01  | 916.10   | 199.88  | 1552.85  |
| 08H050 | NK | 224.49  | 682.35   | 87.42   | 733.93   |
| 08H089 | NK | 219.71  | 409.36   | 71.54   | 834.19   |
| 08H104 | NK | 792.30  | 1720.24  | 207.56  | 1436.88  |
| 08H112 | NK | 3306.16 | 10421.66 | 782.11  | 2913.35  |
| 09H002 | NK | 994.41  | 3081.46  | 221.43  | 632.74   |
| 09H008 | NK | 263.21  | 288.39   | 87.77   | 649.66   |
| 09H013 | NK | 589.58  | 1371.85  | 157.47  | 903.87   |
| 09H042 | NK | 1289.54 | 3706.70  | 276.05  | 1602.67  |
| 09H043 | NK | 764.86  | 2171.58  | 232.39  | 1267.10  |
| 09H058 | NK | 325.34  | 846.19   | 109.40  | 656.83   |
| 09H083 | NK | 6741.38 | 15903.83 | 1651.27 | 8754.98  |
| 09H111 | NK | 135.32  | 579.07   | 42.92   | 169.31   |
| 09H113 | NK | 941.28  | 2594.00  | 302.33  | 1923.04  |
| 10H026 | NK | 239.98  | 708.52   | 89.23   | 876.60   |
| 10H038 | NK | 455.59  | 945.90   | 122.73  | 921.36   |
| 10H056 | NK | 939.08  | 2692.41  | 141.77  | 2209.84  |
| 10H072 | NK | 39.71   | 63.60    | 29.94   | 415.21   |
| 10H089 | NK | 111.49  | 355.59   | 26.76   | 171.45   |
| 10H092 | NK | 549.15  | 1651.78  | 178.41  | 1122.56  |
| 10H095 | NK | 4031.12 | 20000.00 | 1116.51 | 7306.35  |
| 10H101 | NK | 258.12  | 783.60   | 85.88   | 530.89   |
| 10H166 | NK | 859.44  | 2342.91  | 246.34  | 1580.85  |
| 11H006 | NK | 512.89  | 1198.20  | 174.88  | 1234.85  |
| 11H058 | NK | 1519.66 | 3859.81  | 450.59  | 2972.07  |
| 11H072 | NK | 914.44  | 2716.28  | 215.59  | 1315.03  |
| 11H083 | NK | 448.41  | 1092.21  | 116.19  | 1091.75  |
| 11H126 | NK | 187.61  | 185.39   | 32.41   | 186.76   |
| 11H151 | NK | 502.51  | 1128.11  | 112.75  | 832.50   |
| 11H157 | NK | 759.78  | 2377.66  | 191.35  | 1256.23  |
| 11H160 | NK | 159.94  | 378.32   | 27.31   | 220.56   |
| 11H231 | NK | 259.29  | 674.77   | 72.37   | 541.27   |
| 11H234 | NK | 707.55  | 2592.17  | 138.66  | 474.24   |
| 12H007 | NK | 408.99  | 1347.18  | 102.85  | 499.52   |
| 12H021 | NK | 67.63   | 188.26   | 25.16   | 189.26   |
| 12H056 | NK | 3676.07 | 7666.52  | 554.82  | 3415.38  |
| 12H091 | NK | 284.61  | 786.18   | 128.15  | 852.34   |
| 12H171 | NK | 728.71  | 1520.87  | 292.87  | 2013.46  |

|        |                      |         |          |         |          |
|--------|----------------------|---------|----------|---------|----------|
| 13H046 | NK                   | 146.37  | 591.73   | 38.87   | 100.33   |
| 13H053 | NK                   | 5.82    | 15.38    | 5.97    | 40.17    |
| 13H058 | NK                   | 37.95   | 117.95   | 9.74    | 84.79    |
| 13H110 | NK                   | 827.97  | 2598.67  | 272.77  | 1343.63  |
| 13H114 | NK                   | 1819.40 | 4794.86  | 292.78  | 2469.37  |
| 14H007 | NK                   | 735.19  | 2108.42  | 241.40  | 1243.47  |
| 14H015 | NK                   | 1184.45 | 4167.08  | 300.77  | 1406.72  |
| 14H019 | NK                   | 5374.35 | 12949.28 | 1225.66 | 6274.37  |
| 14H020 | NK                   | 9312.23 | 20000.00 | 3808.90 | 13319.29 |
| 07H098 | NUP98 translocations | 145.78  | 333.21   | 38.78   | 429.91   |
| 03H065 | t(8;21)              | 85.99   | 239.35   | 23.15   | 303.82   |
| 05H042 | t(8;21)              | 192.62  | 484.59   | 54.43   | 360.08   |
| 05H184 | t(8;21)              | 504.37  | 1263.53  | 134.35  | 886.45   |
| 06H035 | t(8;21)              | 87.33   | 256.11   | 25.78   | 240.76   |
| 07H137 | t(8;21)              | 11.06   | 20.69    | 1.67    | 53.82    |
| 08H034 | t(8;21)              | 315.50  | 1384.41  | 108.30  | 310.53   |
| 08H072 | t(8;21)              | 278.62  | 961.64   | 85.77   | 724.52   |
| 09H040 | t(8;21)              | 21.69   | 67.47    | 4.82    | 87.95    |
| 10H030 | t(8;21)              | 168.13  | 452.15   | 45.94   | 414.60   |
| 10H119 | t(8;21)              | 430.75  | 994.67   | 188.52  | 895.82   |
| 12H180 | t(8;21)              | 130.31  | 265.88   | 25.67   | 214.47   |
| 05H118 | t(8;21)              | 121.05  | 479.48   | 27.97   | 261.87   |
| 06H048 | Trisomy/tetrasomy 8  | 186.81  | 463.20   | 42.74   | 456.95   |
| 06H077 | Trisomy/tetrasomy 8  | 470.23  | 1061.19  | 230.87  | 1764.98  |
| 07H019 | Trisomy/tetrasomy 8  | 129.31  | 291.46   | 46.15   | 435.09   |
| 08H063 | Trisomy/tetrasomy 8  | 3.75    | 12.38    | 3.07    | 51.37    |
| 08H108 | Trisomy/tetrasomy 8  | 341.50  | 1485.73  | 217.51  | 1449.25  |
| 05H181 | Undetermined         | 303.10  | 818.08   | 145.69  | 1312.63  |

**Table S4. Chemogenomic statin screen**

| Gene     | RANKS_score | p-value  | FDR    |
|----------|-------------|----------|--------|
| SREBF2   | -6.28       | 0.000001 | <0.001 |
| UNC50    | -5.98       | 0.000001 | <0.001 |
| C12orf49 | -5.89       | 0.000001 | <0.001 |
| SCAP     | -5.45       | 0.000001 | <0.001 |
| RAB1B    | -5.31       | 0.000001 | <0.001 |
| ACAT2    | -4.72       | 0.000001 | <0.001 |
| SLC10A7  | -4.54       | 0.000001 | <0.001 |
| YPEL5    | -4.51       | 0.000001 | <0.001 |
| ENTPD4   | -4.47       | 0.000001 | <0.001 |
| MBTPS2   | -4.46       | 0.000001 | <0.001 |
| KIAA1432 | -4.36       | 0.000001 | <0.001 |
| USO1     | -4.31       | 0.000001 | <0.001 |
| RAB1A    | -4.26       | 0.000001 | <0.001 |
| MCTS1    | -4.23       | 0.000001 | <0.001 |
| SLC39A9  | -4.2        | 0.000001 | <0.001 |
| SEC31A   | -4.17       | 0.000001 | <0.001 |
| PITPNB   | -4.06       | 0.000001 | <0.001 |
| MBTPS1   | -3.96       | 0.000001 | <0.001 |
| COG7     | -3.91       | 0.000001 | <0.001 |
| SLC35E1  | -3.91       | 0.000001 | <0.001 |
| NADK     | -3.78       | 0.000001 | <0.001 |
| OTUB1    | -3.75       | 0.000001 | <0.001 |
| ARL1     | -3.6        | 0.000001 | <0.001 |
| RABGGTA  | -3.56       | 0.000001 | <0.001 |
| CARM1    | -3.54       | 0.000001 | <0.001 |
| ATP8B2   | -3.31       | 0.000001 | <0.001 |
| TCF4     | -3.26       | 0.000001 | <0.001 |
| GOLGA2   | -3.17       | 0.000001 | <0.001 |
| COG6     | -3.16       | 0.000001 | <0.001 |
| SQLE     | -3.13       | 0.000001 | <0.001 |
| MTMR6    | -3.07       | 0.000011 | 0.002  |
| ATP2B1   | -2.97       | 0.000007 | 0.001  |
| COG5     | -2.91       | 0.000001 | 0.002  |
| RING1    | -2.87       | 0.000013 | 0.002  |
| FAM122A  | -2.86       | 0.000005 | 0.001  |
| GGPS1    | -2.84       | 0.000005 | 0.001  |
| ABCG1    | -2.81       | 0.000006 | 0.001  |
| SEC63    | -2.81       | 0.000006 | 0.001  |
| CCM2     | -2.79       | 0.000006 | 0.001  |

|          |       |          |       |
|----------|-------|----------|-------|
| DPAGT1   | -2.79 | 0.000007 | 0.001 |
| CDC42    | -2.78 | 0.000007 | 0.001 |
| GSK3B    | -2.78 | 0.000007 | 0.001 |
| TBC1D20  | -2.76 | 0.000008 | 0.001 |
| RHOA     | -2.73 | 0.00001  | 0.002 |
| SEC23B   | -2.73 | 0.00001  | 0.002 |
| TMC2     | -2.71 | 0.000031 | 0.005 |
| DENR     | -2.69 | 0.000013 | 0.002 |
| GOLT1B   | -2.68 | 0.000013 | 0.002 |
| RGP1     | -2.68 | 0.000037 | 0.005 |
| RAB6A    | -2.66 | 0.000015 | 0.002 |
| MARK2    | -2.62 | 0.00002  | 0.003 |
| WDR26    | -2.62 | 0.000049 | 0.007 |
| DPH1     | -2.59 | 0.000025 | 0.004 |
| COG2     | -2.58 | 0.000064 | 0.009 |
| PTEN     | -2.58 | 0.000026 | 0.004 |
| DNAJC8   | -2.57 | 0.000028 | 0.004 |
| C10orf76 | -2.55 | 0.000031 | 0.005 |
| GCC1     | -2.53 | 0.000034 | 0.005 |
| CTCF     | -2.52 | 0.000088 | 0.011 |
| GPR107   | -2.51 | 0.000036 | 0.005 |
| ZNF296   | -2.49 | 0.00004  | 0.006 |
| UBE2E1   | -2.48 | 0.000042 | 0.006 |
| ZMYM3    | -2.47 | 0.000045 | 0.006 |
| SLMAP    | -2.44 | 0.000057 | 0.008 |
| HNRNPH1  | -2.43 | 0.000062 | 0.009 |
| TBC1D23  | -2.42 | 0.000065 | 0.009 |
| RABGGTB  | -2.41 | 0.000071 | 0.009 |
| CDK2     | -2.4  | 0.000074 | 0.01  |
| MESDC1   | -2.39 | 0.000177 | 0.02  |
| WRB      | -2.39 | 0.00008  | 0.01  |
| FLII     | -2.38 | 0.000084 | 0.011 |
| IRF2     | -2.37 | 0.000091 | 0.011 |
| PCYT1A   | -2.37 | 0.000091 | 0.011 |
| PRRC2C   | -2.37 | 0.000436 | 0.04  |
| ARFRP1   | -2.36 | 0.000095 | 0.012 |
| ATL2     | -2.35 | 0.000099 | 0.012 |
| PDCD6IP  | -2.34 | 0.000105 | 0.012 |
| ALG5     | -2.33 | 0.00011  | 0.013 |
| SCYL1    | -2.31 | 0.000125 | 0.015 |
| HMGCR    | -2.28 | 0.00666  | 0.25  |
| HMGCS1   | -2.28 | 0.000149 | 0.017 |
| IQGAP1   | -2.28 | 0.000149 | 0.017 |
| METTL16  | -2.27 | 0.00073  | 0.055 |
| SEC16A   | -2.27 | 0.00073  | 0.055 |
| LPCAT1   | -2.25 | 0.000178 | 0.02  |
| TMEM230  | -2.25 | 0.000374 | 0.036 |

|          |       |          |       |
|----------|-------|----------|-------|
| PPP6R1   | -2.22 | 0.000439 | 0.04  |
| C12orf23 | -2.21 | 0.000225 | 0.025 |
| EIF5B    | -2.21 | 0.003929 | 0.183 |
| PPP6C    | -2.21 | 0.000462 | 0.042 |
| CNOT2    | -2.2  | 0.000237 | 0.026 |
| EDF1     | -2.2  | 0.000488 | 0.044 |
| PPCS     | -2.2  | 0.000238 | 0.026 |
| PA2G4    | -2.19 | 0.000251 | 0.027 |
| BACH2    | -2.18 | 0.000544 | 0.046 |
| NUDC     | -2.18 | 0.000543 | 0.046 |
| OR4D2    | -2.18 | 0.000263 | 0.028 |
| VPS52    | -2.18 | 0.001123 | 0.079 |
| DGAT1    | -2.16 | 0.000609 | 0.049 |
| MTF2     | -2.16 | 0.000609 | 0.049 |
| SPI1     | -2.15 | 0.000643 | 0.051 |
| NR1H2    | -2.14 | 0.000333 | 0.034 |
| ZNF148   | -2.14 | 0.000333 | 0.034 |
| TMEM30A  | -2.13 | 0.00035  | 0.036 |
| TRAPPC13 | -2.13 | 0.000351 | 0.036 |
| AKAP9    | -2.12 | 0.000372 | 0.036 |
| NCEH1    | -2.12 | 0.000372 | 0.036 |
| PCGF1    | -2.12 | 0.000373 | 0.036 |
| TRAPPC3  | -2.11 | 0.000397 | 0.038 |
| VKORC1L1 | -2.11 | 0.000397 | 0.038 |
| RBM38    | -2.1  | 0.000422 | 0.04  |
| DNAJC24  | -2.08 | 0.000472 | 0.043 |
| CYB561D2 | -2.07 | 0.0005   | 0.044 |
| THEG     | -2.07 | 0.000499 | 0.044 |
| MATR3    | -2.06 | 0.000532 | 0.046 |
| TSC2     | -2.06 | 0.000533 | 0.046 |
| CHMP7    | -2.05 | 0.000565 | 0.047 |
| GET4     | -2.05 | 0.000564 | 0.047 |
| JMJD6    | -2.05 | 0.000564 | 0.047 |
| SEC23IP  | -2.05 | 0.001055 | 0.075 |
| TSC1     | -2.04 | 0.000597 | 0.049 |
| CNOT8    | -2.03 | 0.000628 | 0.05  |
| AGO2     | -2.02 | 0.001222 | 0.085 |
| COG3     | -2.01 | 0.002427 | 0.134 |
| GOSR1    | -2.01 | 0.000706 | 0.054 |
| HSPA13   | -2.01 | 0.000705 | 0.054 |
| RCC2     | -2.01 | 0.000705 | 0.054 |
| RTFDC1   | -2.01 | 0.000705 | 0.054 |
| ZBTB8OS  | -2.01 | 0.004402 | 0.2   |
| AKNAD1   | -2    | 0.002543 | 0.139 |
| ALG6     | -2    | 0.000748 | 0.055 |
| NCOA4    | -2    | 0.000748 | 0.055 |
| SAR1A    | -2    | 0.000747 | 0.055 |

|         |       |          |       |
|---------|-------|----------|-------|
| DERL2   | -1.99 | 0.000788 | 0.057 |
| SLC11A2 | -1.99 | 0.000788 | 0.057 |
| MARCH5  | -1.98 | 0.000833 | 0.06  |
| EPRS    | -1.97 | 0.001577 | 0.102 |
| ATP6V1D | -1.96 | 0.00166  | 0.104 |
| UBIAD1  | -1.96 | 0.00166  | 0.104 |
| VPS25   | -1.96 | 0.005376 | 0.226 |
| ARID3A  | -1.95 | 0.001748 | 0.109 |
| TM2D2   | -1.91 | 0.00121  | 0.085 |
| C1orf43 | -1.9  | 0.001277 | 0.088 |
| CCNL2   | -1.89 | 0.001342 | 0.091 |
| RYBP    | -1.89 | 0.002344 | 0.132 |
| SOX4    | -1.89 | 0.004082 | 0.189 |
| ZFP36L1 | -1.89 | 0.001342 | 0.091 |
| BRD1    | -1.88 | 0.001415 | 0.095 |
| IKZF1   | -1.88 | 0.001415 | 0.095 |
| BUB3    | -1.87 | 0.002599 | 0.141 |
| FKBP1A  | -1.87 | 0.001498 | 0.1   |
| ATP6V1A | -1.86 | 0.001583 | 0.102 |
| SRPK1   | -1.86 | 0.001582 | 0.102 |
| TSSC1   | -1.86 | 0.001583 | 0.102 |
| VAPA    | -1.86 | 0.001583 | 0.102 |
| GEMIN5  | -1.85 | 0.00167  | 0.104 |
| ISM2    | -1.85 | 0.00167  | 0.104 |
| LRP10   | -1.85 | 0.002861 | 0.15  |
| KDM8    | -1.84 | 0.003003 | 0.155 |
| TOX4    | -1.84 | 0.001758 | 0.109 |
| UBQLN1  | -1.83 | 0.001866 | 0.114 |
| ADIPOR1 | -1.82 | 0.001971 | 0.116 |
| CBX3    | -1.82 | 0.001972 | 0.116 |
| GCN1L1  | -1.82 | 0.001971 | 0.116 |
| KLHL20  | -1.82 | 0.001971 | 0.116 |
| SMCHD1  | -1.82 | 0.001972 | 0.116 |
| STARD4  | -1.82 | 0.001972 | 0.116 |
| TM9SF2  | -1.82 | 0.001972 | 0.116 |
| COG4    | -1.81 | 0.002076 | 0.12  |
| RTCB    | -1.81 | 0.002077 | 0.12  |
| AMFR    | -1.8  | 0.002193 | 0.125 |
| ECHS1   | -1.8  | 0.002193 | 0.125 |
| ELF1    | -1.79 | 0.002311 | 0.131 |
| MYLIP   | -1.79 | 0.002311 | 0.131 |
| NHLRC2  | -1.79 | 0.003827 | 0.18  |
| POLE4   | -1.78 | 0.002439 | 0.134 |
| SUGT1   | -1.78 | 0.002439 | 0.134 |
| TXNL4A  | -1.78 | 0.029952 | 0.491 |
| ZFP36L2 | -1.78 | 0.00244  | 0.134 |
| GFPT1   | -1.77 | 0.004204 | 0.194 |

|           |       |          |       |
|-----------|-------|----------|-------|
| DNAJC6    | -1.76 | 0.002707 | 0.145 |
| FZR1      | -1.76 | 0.002707 | 0.145 |
| NOC3L     | -1.76 | 0.007104 | 0.261 |
| NUTM2G    | -1.75 | 0.002849 | 0.15  |
| TRIP11    | -1.75 | 0.002849 | 0.15  |
| ZNF83     | -1.75 | 0.002849 | 0.15  |
| DNTTIP1   | -1.74 | 0.002997 | 0.155 |
| ERCC2     | -1.74 | 0.012453 | 0.35  |
| PRIM2     | -1.74 | 0.012453 | 0.35  |
| ZSCAN22   | -1.74 | 0.002996 | 0.155 |
| ABCB7     | -1.73 | 0.003155 | 0.158 |
| CD5       | -1.73 | 0.003154 | 0.158 |
| FLVCR2    | -1.73 | 0.005058 | 0.215 |
| GIMAP7    | -1.73 | 0.003155 | 0.158 |
| OSBPL11   | -1.73 | 0.003155 | 0.158 |
| PAX5      | -1.73 | 0.005059 | 0.215 |
| PPIG      | -1.73 | 0.003155 | 0.158 |
| CLCA1     | -1.72 | 0.003324 | 0.164 |
| LTB4R     | -1.72 | 0.003324 | 0.164 |
| MAD2L1    | -1.72 | 0.003323 | 0.164 |
| CNBD2     | -1.71 | 0.00349  | 0.168 |
| CTDNEP1   | -1.71 | 0.00349  | 0.168 |
| PI4KB     | -1.71 | 0.003491 | 0.168 |
| TRAPPC12  | -1.71 | 0.00349  | 0.168 |
| AGFG1     | -1.7  | 0.003671 | 0.173 |
| FOXD4L1   | -1.7  | 0.00367  | 0.173 |
| IER3IP1   | -1.7  | 0.00367  | 0.173 |
| SDPR      | -1.7  | 0.003671 | 0.173 |
| ALG12     | -1.69 | 0.00385  | 0.18  |
| CDK11A    | -1.69 | 0.006083 | 0.24  |
| HNRNPA2B1 | -1.69 | 0.009531 | 0.313 |
| SOD2      | -1.69 | 0.006083 | 0.24  |
| CMC2      | -1.68 | 0.024572 | 0.458 |
| CUX1      | -1.67 | 0.006667 | 0.25  |
| GMPPB     | -1.67 | 0.006667 | 0.25  |
| METTL14   | -1.67 | 0.006668 | 0.25  |
| NFIA      | -1.67 | 0.004249 | 0.194 |
| RBM34     | -1.67 | 0.004248 | 0.194 |
| CCBE1     | -1.66 | 0.006955 | 0.257 |
| GSKIP     | -1.66 | 0.004477 | 0.2   |
| MAPK14    | -1.66 | 0.004477 | 0.2   |
| SEC22B    | -1.66 | 0.004476 | 0.2   |
| B3GNT5    | -1.65 | 0.007277 | 0.263 |
| FAM69A    | -1.65 | 0.004699 | 0.204 |
| LPAR1     | -1.65 | 0.004699 | 0.204 |
| NR2C2     | -1.65 | 0.004699 | 0.204 |
| SLC25A1   | -1.65 | 0.004699 | 0.204 |

|           |       |          |       |
|-----------|-------|----------|-------|
| UBE2D3    | -1.65 | 0.004699 | 0.204 |
| ZC3H15    | -1.65 | 0.0047   | 0.204 |
| CANX      | -1.64 | 0.007625 | 0.274 |
| EFS       | -1.64 | 0.004938 | 0.212 |
| KRTAP9-2  | -1.64 | 0.004938 | 0.212 |
| PANK1     | -1.64 | 0.004938 | 0.212 |
| CCDC27    | -1.63 | 0.012169 | 0.345 |
| DIAPH1    | -1.63 | 0.005188 | 0.219 |
| EIF1      | -1.63 | 0.007977 | 0.279 |
| GZMH      | -1.62 | 0.005456 | 0.226 |
| NFE2L3    | -1.62 | 0.005455 | 0.226 |
| TFE3      | -1.62 | 0.005455 | 0.226 |
| TMA7      | -1.62 | 0.005455 | 0.226 |
| EIF5A     | -1.61 | 0.020013 | 0.416 |
| MPPE1     | -1.61 | 0.005728 | 0.233 |
| TAS2R46   | -1.61 | 0.005727 | 0.233 |
| ZNF292    | -1.61 | 0.005727 | 0.233 |
| ZNF326    | -1.61 | 0.005727 | 0.233 |
| C9orf57   | -1.6  | 0.00601  | 0.239 |
| NAA38     | -1.6  | 0.013733 | 0.362 |
| SEPT5     | -1.6  | 0.009091 | 0.303 |
| SERBP1    | -1.6  | 0.00601  | 0.239 |
| WDR5B     | -1.6  | 0.00601  | 0.239 |
| ZDHHC3    | -1.6  | 0.00909  | 0.303 |
| ZNF639    | -1.6  | 0.00601  | 0.239 |
| ZNHIT1    | -1.6  | 0.006011 | 0.239 |
| CBFA2T2   | -1.59 | 0.00631  | 0.242 |
| EIF4ENIF1 | -1.59 | 0.006311 | 0.242 |
| FAM196A   | -1.59 | 0.009507 | 0.313 |
| HTT       | -1.59 | 0.00631  | 0.242 |
| PRRC2B    | -1.59 | 0.006311 | 0.242 |
| RFC5      | -1.59 | 0.00631  | 0.242 |
| SNRNP40   | -1.59 | 0.006311 | 0.242 |
| COPS5     | -1.58 | 0.009949 | 0.32  |
| LRMP      | -1.58 | 0.009949 | 0.32  |
| PCTP      | -1.58 | 0.006617 | 0.25  |
| SUPT3H    | -1.58 | 0.006617 | 0.25  |
| DISP1     | -1.57 | 0.010388 | 0.326 |
| NAA20     | -1.57 | 0.006924 | 0.256 |
| PAX2      | -1.57 | 0.006924 | 0.256 |
| WDR89     | -1.57 | 0.006924 | 0.256 |
| ZDHHC5    | -1.57 | 0.010388 | 0.326 |
| HYOU1     | -1.56 | 0.016066 | 0.392 |
| MVK       | -1.56 | 0.016067 | 0.392 |
| SEC24A    | -1.56 | 0.007265 | 0.263 |
| TRAF3IP2  | -1.56 | 0.007265 | 0.263 |
| TRAPPC4   | -1.56 | 0.007265 | 0.263 |

|          |       |          |       |
|----------|-------|----------|-------|
| CBL      | -1.55 | 0.011357 | 0.335 |
| GANAB    | -1.55 | 0.011357 | 0.335 |
| JTB      | -1.55 | 0.007622 | 0.274 |
| CAMK2G   | -1.54 | 0.008003 | 0.279 |
| G3BP1    | -1.54 | 0.008003 | 0.279 |
| GTF2I    | -1.54 | 0.008003 | 0.279 |
| MANEA    | -1.54 | 0.008003 | 0.279 |
| NOLC1    | -1.54 | 0.008002 | 0.279 |
| SPPL3    | -1.54 | 0.008003 | 0.279 |
| UBA3     | -1.54 | 0.011855 | 0.342 |
| ZBTB18   | -1.54 | 0.008003 | 0.279 |
| C9orf43  | -1.53 | 0.008387 | 0.285 |
| COL9A2   | -1.53 | 0.008387 | 0.285 |
| GOSR2    | -1.53 | 0.008387 | 0.285 |
| GPR153   | -1.53 | 0.008387 | 0.285 |
| GRIPAP1  | -1.53 | 0.008387 | 0.285 |
| SNX32    | -1.53 | 0.008387 | 0.285 |
| DOCK10   | -1.52 | 0.008789 | 0.295 |
| PATE3    | -1.52 | 0.008789 | 0.295 |
| SAP130   | -1.52 | 0.012904 | 0.354 |
| SMAD2    | -1.52 | 0.008789 | 0.295 |
| SYS1     | -1.52 | 0.018796 | 0.408 |
| TSPYL6   | -1.52 | 0.00879  | 0.295 |
| MMP3     | -1.51 | 0.009227 | 0.305 |
| PCYOX1   | -1.51 | 0.009227 | 0.305 |
| PIIP5K2  | -1.51 | 0.013466 | 0.356 |
| YKT6     | -1.51 | 0.013466 | 0.356 |
| OR2T11   | -1.5  | 0.009688 | 0.314 |
| PPIL3    | -1.5  | 0.009688 | 0.314 |
| TMF1     | -1.5  | 0.009688 | 0.314 |
| ZBTB41   | -1.5  | 0.009688 | 0.314 |
| CYB561A3 | -1.49 | 0.010147 | 0.323 |
| NASP     | -1.49 | 0.010147 | 0.323 |
| PAXBP1   | -1.49 | 0.014671 | 0.375 |
| SARS     | -1.49 | 0.044461 | 0.577 |
| UGGT1    | -1.49 | 0.010148 | 0.323 |
| ARID5A   | -1.48 | 0.010628 | 0.326 |
| BRS3     | -1.48 | 0.010629 | 0.326 |
| EBPL     | -1.48 | 0.010628 | 0.326 |
| LHX9     | -1.48 | 0.010629 | 0.326 |
| NAA25    | -1.48 | 0.010628 | 0.326 |
| NDEL1    | -1.48 | 0.010628 | 0.326 |
| NEDD1    | -1.48 | 0.021895 | 0.434 |
| SBNO2    | -1.48 | 0.010628 | 0.326 |
| TMEM123  | -1.48 | 0.010628 | 0.326 |
| TNKS     | -1.48 | 0.010629 | 0.326 |
| ANP32A   | -1.47 | 0.011131 | 0.33  |

|          |       |          |       |
|----------|-------|----------|-------|
| C17orf97 | -1.47 | 0.011131 | 0.33  |
| FIBP     | -1.47 | 0.011131 | 0.33  |
| NSMCE1   | -1.47 | 0.011131 | 0.33  |
| PCNP     | -1.47 | 0.011132 | 0.33  |
| PDAP1    | -1.47 | 0.011131 | 0.33  |
| PGGT1B   | -1.47 | 0.011132 | 0.33  |
| QKI      | -1.47 | 0.011131 | 0.33  |
| TMEM206  | -1.47 | 0.011131 | 0.33  |
| ZNF519   | -1.47 | 0.011131 | 0.33  |
| ARSK     | -1.46 | 0.011645 | 0.337 |
| ASNA1    | -1.46 | 0.011644 | 0.337 |
| GLRX3    | -1.46 | 0.011644 | 0.337 |
| KRAS     | -1.46 | 0.016637 | 0.394 |
| MOB4     | -1.46 | 0.011645 | 0.337 |
| MON2     | -1.46 | 0.011644 | 0.337 |
| SPATA6   | -1.46 | 0.011645 | 0.337 |
| ADA      | -1.45 | 0.012192 | 0.345 |
| DDIT4    | -1.45 | 0.017346 | 0.396 |
| ENTHD1   | -1.45 | 0.017346 | 0.396 |
| MEMO1    | -1.45 | 0.012193 | 0.345 |
| SRGAP3   | -1.45 | 0.012193 | 0.345 |
| SRP19    | -1.45 | 0.017347 | 0.396 |
| UBE4B    | -1.45 | 0.012193 | 0.345 |
| WDR62    | -1.45 | 0.012192 | 0.345 |
| ACTG1    | -1.44 | 0.012757 | 0.351 |
| BAI3     | -1.44 | 0.012757 | 0.351 |
| CCND2    | -1.44 | 0.012756 | 0.351 |
| KCND3    | -1.44 | 0.012757 | 0.351 |
| PPP1CA   | -1.44 | 0.012757 | 0.351 |
| SLIT1    | -1.44 | 0.018071 | 0.404 |
| TEX33    | -1.44 | 0.012756 | 0.351 |
| ZC3H14   | -1.44 | 0.012757 | 0.351 |
| ACIN1    | -1.43 | 0.018826 | 0.408 |
| C20orf78 | -1.43 | 0.013359 | 0.355 |
| EFCAB9   | -1.43 | 0.01336  | 0.355 |
| EPN2     | -1.43 | 0.013359 | 0.355 |
| FIS1     | -1.43 | 0.01336  | 0.355 |
| IREB2    | -1.43 | 0.013359 | 0.355 |
| KDM3B    | -1.43 | 0.013359 | 0.355 |
| LRRC30   | -1.43 | 0.018827 | 0.408 |
| PGM3     | -1.43 | 0.01336  | 0.355 |
| PHIP     | -1.43 | 0.013359 | 0.355 |
| RPL27A   | -1.43 | 0.026455 | 0.474 |
| SEMA6C   | -1.43 | 0.01336  | 0.355 |
| SPOPL    | -1.43 | 0.01336  | 0.355 |
| TMTC2    | -1.43 | 0.013359 | 0.355 |
| CCL2     | -1.42 | 0.013997 | 0.364 |

|          |       |          |       |
|----------|-------|----------|-------|
| HAUS8    | -1.42 | 0.013997 | 0.364 |
| RAD54L2  | -1.42 | 0.013997 | 0.364 |
| RXRB     | -1.42 | 0.019641 | 0.416 |
| SEPHS2   | -1.42 | 0.013997 | 0.364 |
| ZNF410   | -1.42 | 0.013997 | 0.364 |
| BEST3    | -1.41 | 0.014635 | 0.375 |
| CDIPT    | -1.41 | 0.028518 | 0.482 |
| ENO3     | -1.41 | 0.014634 | 0.375 |
| KAT8     | -1.41 | 0.028518 | 0.482 |
| PMP2     | -1.41 | 0.014635 | 0.375 |
| R3HCC1   | -1.41 | 0.020462 | 0.424 |
| RBM45    | -1.41 | 0.014635 | 0.375 |
| SND1     | -1.41 | 0.014635 | 0.375 |
| ERCC8    | -1.4  | 0.015338 | 0.386 |
| GPR27    | -1.4  | 0.015338 | 0.386 |
| KLHL22   | -1.4  | 0.015338 | 0.386 |
| MSRA     | -1.4  | 0.015338 | 0.386 |
| PLEK2    | -1.4  | 0.015338 | 0.386 |
| POLE3    | -1.4  | 0.015338 | 0.386 |
| PSMA2    | -1.4  | 0.021285 | 0.432 |
| RASGRP2  | -1.4  | 0.021285 | 0.432 |
| TM2D1    | -1.4  | 0.021285 | 0.432 |
| A1CF     | -1.39 | 0.022154 | 0.438 |
| CD53     | -1.39 | 0.016017 | 0.392 |
| CMTR2    | -1.39 | 0.016017 | 0.392 |
| DUSP26   | -1.39 | 0.016017 | 0.392 |
| PICALM   | -1.39 | 0.016017 | 0.392 |
| PRMT7    | -1.39 | 0.016017 | 0.392 |
| QTRTD1   | -1.39 | 0.016017 | 0.392 |
| SYAP1    | -1.39 | 0.016017 | 0.392 |
| USP32    | -1.39 | 0.016018 | 0.392 |
| ZDHHC17  | -1.39 | 0.016017 | 0.392 |
| BANF1    | -1.38 | 0.031816 | 0.501 |
| BCAM     | -1.38 | 0.016748 | 0.394 |
| C17orf85 | -1.38 | 0.016748 | 0.394 |
| CAB39    | -1.38 | 0.031816 | 0.501 |
| CHKA     | -1.38 | 0.016748 | 0.394 |
| COA4     | -1.38 | 0.016748 | 0.394 |
| ELAVL1   | -1.38 | 0.016748 | 0.394 |
| EXOC3    | -1.38 | 0.016748 | 0.394 |
| GDI2     | -1.38 | 0.016748 | 0.394 |
| GPR61    | -1.38 | 0.016748 | 0.394 |
| KPNA3    | -1.38 | 0.023081 | 0.444 |
| LIN54    | -1.38 | 0.016748 | 0.394 |
| LRTOMT   | -1.38 | 0.016748 | 0.394 |
| P2RX1    | -1.38 | 0.016748 | 0.394 |
| RC3H1    | -1.38 | 0.016748 | 0.394 |

|            |       |          |       |
|------------|-------|----------|-------|
| SMPD4      | -1.38 | 0.016748 | 0.394 |
| SNF8       | -1.38 | 0.023081 | 0.444 |
| THOC3      | -1.38 | 0.023081 | 0.444 |
| TOB2       | -1.38 | 0.023081 | 0.444 |
| ANAPC15    | -1.37 | 0.024027 | 0.449 |
| BEX2       | -1.37 | 0.017523 | 0.396 |
| CHRNA7     | -1.37 | 0.017522 | 0.396 |
| DPM2       | -1.37 | 0.017523 | 0.396 |
| EXOC4      | -1.37 | 0.017523 | 0.396 |
| FGF21      | -1.37 | 0.017522 | 0.396 |
| HDGF       | -1.37 | 0.017522 | 0.396 |
| HEATR3     | -1.37 | 0.017522 | 0.396 |
| HSPD1      | -1.37 | 0.017523 | 0.396 |
| KRIT1      | -1.37 | 0.017522 | 0.396 |
| PCMT1      | -1.37 | 0.017522 | 0.396 |
| RBP4       | -1.37 | 0.017522 | 0.396 |
| TGIF2-C20o | -1.37 | 0.017522 | 0.396 |
| TRPM4      | -1.37 | 0.017523 | 0.396 |
| UQCRB      | -1.37 | 0.024026 | 0.449 |
| ABHD2      | -1.36 | 0.018346 | 0.404 |
| CENPM      | -1.36 | 0.025021 | 0.462 |
| DTNBP1     | -1.36 | 0.018347 | 0.404 |
| GADD45G    | -1.36 | 0.018346 | 0.404 |
| GPR101     | -1.36 | 0.018346 | 0.404 |
| HIST1H3G   | -1.36 | 0.018346 | 0.404 |
| ME3        | -1.36 | 0.018347 | 0.404 |
| RBM5       | -1.36 | 0.018346 | 0.404 |
| SOD1       | -1.36 | 0.018347 | 0.404 |
| TAS2R60    | -1.36 | 0.018346 | 0.404 |
| UBE2N      | -1.36 | 0.018346 | 0.404 |
| ABRA       | -1.35 | 0.019159 | 0.408 |
| DUSP1      | -1.35 | 0.019159 | 0.408 |
| IKZF2      | -1.35 | 0.019159 | 0.408 |
| L3MBTL2    | -1.35 | 0.019159 | 0.408 |
| MIER2      | -1.35 | 0.026025 | 0.471 |
| PLEC       | -1.35 | 0.019159 | 0.408 |
| PTGDR2     | -1.35 | 0.019159 | 0.408 |
| RAPGEF1    | -1.35 | 0.019159 | 0.408 |
| RPE        | -1.35 | 0.026025 | 0.471 |
| TAL1       | -1.35 | 0.019159 | 0.408 |
| TRAPPC2L   | -1.35 | 0.019159 | 0.408 |
| ZIC3       | -1.35 | 0.019159 | 0.408 |
| ZNF136     | -1.35 | 0.019158 | 0.408 |
| ZNF462     | -1.35 | 0.026025 | 0.471 |
| ABCC5      | -1.34 | 0.020006 | 0.416 |
| ARID1A     | -1.34 | 0.036798 | 0.53  |
| ATP6V1G1   | -1.34 | 0.027088 | 0.474 |

|           |       |          |       |
|-----------|-------|----------|-------|
| C6orf118  | -1.34 | 0.027087 | 0.474 |
| CUL4B     | -1.34 | 0.027087 | 0.474 |
| EEF2      | -1.34 | 0.095471 | 0.722 |
| KIF4B     | -1.34 | 0.020006 | 0.416 |
| LTB4R2    | -1.34 | 0.020006 | 0.416 |
| PHACTR4   | -1.34 | 0.020007 | 0.416 |
| PHF8      | -1.34 | 0.020006 | 0.416 |
| RALGAPB   | -1.34 | 0.020007 | 0.416 |
| SORL1     | -1.34 | 0.020007 | 0.416 |
| STK40     | -1.34 | 0.020006 | 0.416 |
| TMUB2     | -1.34 | 0.020006 | 0.416 |
| CCDC130   | -1.33 | 0.020882 | 0.426 |
| FADS3     | -1.33 | 0.020882 | 0.426 |
| HOXB5     | -1.33 | 0.028173 | 0.481 |
| KDM1B     | -1.33 | 0.020882 | 0.426 |
| LIN9      | -1.33 | 0.028173 | 0.481 |
| POU3F2    | -1.33 | 0.020882 | 0.426 |
| PRDM15    | -1.33 | 0.020882 | 0.426 |
| SLC6A15   | -1.33 | 0.020882 | 0.426 |
| SMIM13    | -1.33 | 0.020882 | 0.426 |
| STPG1     | -1.33 | 0.028173 | 0.481 |
| TBC1D17   | -1.33 | 0.028173 | 0.481 |
| AGPAT6    | -1.32 | 0.021809 | 0.433 |
| B4GALT2   | -1.32 | 0.021809 | 0.433 |
| C14orf169 | -1.32 | 0.029323 | 0.482 |
| HOXA11    | -1.32 | 0.02181  | 0.433 |
| PPIA      | -1.32 | 0.021809 | 0.433 |
| PQLC1     | -1.32 | 0.021809 | 0.433 |
| PROX2     | -1.32 | 0.021809 | 0.433 |
| RP2       | -1.32 | 0.02181  | 0.433 |
| UBE2Z     | -1.32 | 0.02181  | 0.433 |
| VMA21     | -1.32 | 0.02181  | 0.433 |
| WHSC1     | -1.32 | 0.02181  | 0.433 |
| ACO2      | -1.31 | 0.022792 | 0.442 |
| ALG8      | -1.31 | 0.022792 | 0.442 |
| CHD7      | -1.31 | 0.030513 | 0.493 |
| CYP2E1    | -1.31 | 0.022792 | 0.442 |
| KDM6A     | -1.31 | 0.022793 | 0.442 |
| PLXNB1    | -1.31 | 0.022793 | 0.442 |
| TEAD4     | -1.31 | 0.022793 | 0.442 |
| TGIF2     | -1.31 | 0.022793 | 0.442 |
| TRPV6     | -1.31 | 0.022793 | 0.442 |
| ZNF720    | -1.31 | 0.022793 | 0.442 |
| ALK       | -1.3  | 0.023787 | 0.446 |
| CD2BP2    | -1.3  | 0.023786 | 0.446 |
| CPD       | -1.3  | 0.023786 | 0.446 |
| DEFB118   | -1.3  | 0.023787 | 0.446 |

|          |       |          |       |
|----------|-------|----------|-------|
| ELMSAN1  | -1.3  | 0.023787 | 0.446 |
| NFE2     | -1.3  | 0.023787 | 0.446 |
| NXT1     | -1.3  | 0.023787 | 0.446 |
| PHF6     | -1.3  | 0.023787 | 0.446 |
| PRODH2   | -1.3  | 0.023787 | 0.446 |
| SLC25A52 | -1.3  | 0.023786 | 0.446 |
| STYX     | -1.3  | 0.023787 | 0.446 |
| TCAF2    | -1.3  | 0.056917 | 0.635 |
| ZBTB32   | -1.3  | 0.023787 | 0.446 |
| BCAP29   | -1.29 | 0.02482  | 0.459 |
| COX6B1   | -1.29 | 0.03302  | 0.508 |
| DLAT     | -1.29 | 0.033021 | 0.508 |
| DPH5     | -1.29 | 0.02482  | 0.459 |
| GPR33    | -1.29 | 0.03302  | 0.508 |
| HRH1     | -1.29 | 0.03302  | 0.508 |
| INPPL1   | -1.29 | 0.02482  | 0.459 |
| RPA1     | -1.29 | 0.05876  | 0.642 |
| TRPA1    | -1.29 | 0.02482  | 0.459 |
| FOXA2    | -1.28 | 0.025912 | 0.471 |
| GBE1     | -1.28 | 0.025913 | 0.471 |
| MYL12A   | -1.28 | 0.025913 | 0.471 |
| PPP1R2   | -1.28 | 0.025912 | 0.471 |
| SATB2    | -1.28 | 0.025912 | 0.471 |
| SCGB2B2  | -1.28 | 0.025912 | 0.471 |
| THAP6    | -1.28 | 0.025912 | 0.471 |
| UBE3B    | -1.28 | 0.034313 | 0.517 |
| C11orf30 | -1.27 | 0.027023 | 0.474 |
| C11orf84 | -1.27 | 0.027023 | 0.474 |
| CCDC134  | -1.27 | 0.027023 | 0.474 |
| EDC3     | -1.27 | 0.027022 | 0.474 |
| FAM181A  | -1.27 | 0.035675 | 0.522 |
| GH2      | -1.27 | 0.027023 | 0.474 |
| GTF3C5   | -1.27 | 0.035675 | 0.522 |
| LPO      | -1.27 | 0.035675 | 0.522 |
| LY6G6C   | -1.27 | 0.027023 | 0.474 |
| MGAT5B   | -1.27 | 0.027023 | 0.474 |
| MLPH     | -1.27 | 0.035675 | 0.522 |
| MORN3    | -1.27 | 0.027023 | 0.474 |
| PLEKHH2  | -1.27 | 0.027022 | 0.474 |
| PRR14L   | -1.27 | 0.027023 | 0.474 |
| RAVER1   | -1.27 | 0.035675 | 0.522 |
| SCFD1    | -1.27 | 0.035675 | 0.522 |
| STK25    | -1.27 | 0.027023 | 0.474 |
| TFPI     | -1.27 | 0.027023 | 0.474 |
| TPTE     | -1.27 | 0.027023 | 0.474 |
| TXNL4B   | -1.27 | 0.035675 | 0.522 |
| ACAN     | -1.26 | 0.02814  | 0.481 |

|          |       |          |       |
|----------|-------|----------|-------|
| ADSL     | -1.26 | 0.064546 | 0.667 |
| BAG6     | -1.26 | 0.02814  | 0.481 |
| DMRTA1   | -1.26 | 0.02814  | 0.481 |
| GOLGA1   | -1.26 | 0.02814  | 0.481 |
| INIP     | -1.26 | 0.02814  | 0.481 |
| MYRF     | -1.26 | 0.028141 | 0.481 |
| OSGIN2   | -1.26 | 0.028141 | 0.481 |
| PGD      | -1.26 | 0.037076 | 0.53  |
| RFC3     | -1.26 | 0.02814  | 0.481 |
| SLC10A1  | -1.26 | 0.02814  | 0.481 |
| USH2A    | -1.26 | 0.02814  | 0.481 |
| ZNF202   | -1.26 | 0.037076 | 0.53  |
| CENPN    | -1.25 | 0.029324 | 0.482 |
| COL8A1   | -1.25 | 0.029324 | 0.482 |
| CPPED1   | -1.25 | 0.038524 | 0.543 |
| DPH2     | -1.25 | 0.029324 | 0.482 |
| HIF1A    | -1.25 | 0.029324 | 0.482 |
| HPGD     | -1.25 | 0.029324 | 0.482 |
| KLRD1    | -1.25 | 0.029324 | 0.482 |
| NBR1     | -1.25 | 0.029324 | 0.482 |
| NDUFB3   | -1.25 | 0.029324 | 0.482 |
| NMRK2    | -1.25 | 0.029324 | 0.482 |
| PFN1     | -1.25 | 0.029324 | 0.482 |
| RBBP6    | -1.25 | 0.029324 | 0.482 |
| SGMS1    | -1.25 | 0.029324 | 0.482 |
| SLBP     | -1.25 | 0.029324 | 0.482 |
| SPEF2    | -1.25 | 0.029324 | 0.482 |
| SYNGAP1  | -1.25 | 0.029324 | 0.482 |
| TIPRL    | -1.25 | 0.029324 | 0.482 |
| TRAPPC11 | -1.25 | 0.029324 | 0.482 |
| ZDHHC12  | -1.25 | 0.029324 | 0.482 |
| BCLAF1   | -1.24 | 0.040047 | 0.547 |
| CDAN1    | -1.24 | 0.068671 | 0.667 |
| CDK5R1   | -1.24 | 0.030593 | 0.493 |
| FAM72C   | -1.24 | 0.162567 | 0.822 |
| FBXO43   | -1.24 | 0.030592 | 0.493 |
| LZTS3    | -1.24 | 0.040047 | 0.547 |
| MPP7     | -1.24 | 0.030593 | 0.493 |
| NCMAP    | -1.24 | 0.030593 | 0.493 |
| PCDHGC5  | -1.24 | 0.040047 | 0.547 |
| PTAR1    | -1.24 | 0.040047 | 0.547 |
| SLC35F4  | -1.24 | 0.030593 | 0.493 |
| SPAG9    | -1.24 | 0.030593 | 0.493 |
| TFAP2B   | -1.24 | 0.030593 | 0.493 |
| UFL1     | -1.24 | 0.030593 | 0.493 |
| UGT2B4   | -1.24 | 0.030592 | 0.493 |
| ZFYVE21  | -1.24 | 0.040047 | 0.547 |

|           |       |          |       |
|-----------|-------|----------|-------|
| ZNF341    | -1.24 | 0.052291 | 0.624 |
| ATP6V1E1  | -1.23 | 0.031875 | 0.501 |
| BCL11A    | -1.23 | 0.031875 | 0.501 |
| C17orf105 | -1.23 | 0.031875 | 0.501 |
| DDA1      | -1.23 | 0.031875 | 0.501 |
| DPF2      | -1.23 | 0.031875 | 0.501 |
| GALNTL5   | -1.23 | 0.031875 | 0.501 |
| PYROXD1   | -1.23 | 0.031874 | 0.501 |
| RAPGEF3   | -1.23 | 0.031875 | 0.501 |
| SEC24C    | -1.23 | 0.031875 | 0.501 |
| SOX13     | -1.23 | 0.031874 | 0.501 |
| TIMM22    | -1.23 | 0.031875 | 0.501 |
| ZNF736    | -1.23 | 0.031875 | 0.501 |
| ALG1      | -1.22 | 0.033205 | 0.508 |
| ANKRD52   | -1.22 | 0.033205 | 0.508 |
| CCR10     | -1.22 | 0.033205 | 0.508 |
| CFLAR     | -1.22 | 0.033205 | 0.508 |
| CPSF1     | -1.22 | 0.056019 | 0.634 |
| ELOVL1    | -1.22 | 0.033205 | 0.508 |
| GTF3C1    | -1.22 | 0.043174 | 0.568 |
| HEPHL1    | -1.22 | 0.043173 | 0.568 |
| KCTD14    | -1.22 | 0.033205 | 0.508 |
| LIG4      | -1.22 | 0.043173 | 0.568 |
| MAN2C1    | -1.22 | 0.033205 | 0.508 |
| ORC3      | -1.22 | 0.033205 | 0.508 |
| PAM16     | -1.22 | 0.033205 | 0.508 |
| RASGRF2   | -1.22 | 0.033205 | 0.508 |
| SCO2      | -1.22 | 0.033205 | 0.508 |
| UVSSA     | -1.22 | 0.033205 | 0.508 |
| ZBTB22    | -1.22 | 0.033205 | 0.508 |
| ABCA3     | -1.21 | 0.034612 | 0.517 |
| BLCAP     | -1.21 | 0.044812 | 0.579 |
| CNNM1     | -1.21 | 0.034612 | 0.517 |
| ITSN1     | -1.21 | 0.034613 | 0.517 |
| KRT12     | -1.21 | 0.034612 | 0.517 |
| MFAP3     | -1.21 | 0.034612 | 0.517 |
| OR8K1     | -1.21 | 0.034612 | 0.517 |
| ORAOV1    | -1.21 | 0.057972 | 0.635 |
| PREB      | -1.21 | 0.057973 | 0.635 |
| SNAP47    | -1.21 | 0.034612 | 0.517 |
| TBCD      | -1.21 | 0.044812 | 0.579 |
| UBE2S     | -1.21 | 0.034612 | 0.517 |
| UGT2A2    | -1.21 | 0.034613 | 0.517 |
| USP5      | -1.21 | 0.034613 | 0.517 |
| VPREB1    | -1.21 | 0.044812 | 0.579 |
| YIPF5     | -1.21 | 0.034612 | 0.517 |
| ZNF239    | -1.21 | 0.034613 | 0.517 |

|           |       |          |       |
|-----------|-------|----------|-------|
| ZNF750    | -1.21 | 0.034612 | 0.517 |
| C7orf10   | -1.2  | 0.036059 | 0.522 |
| CCDC151   | -1.2  | 0.036059 | 0.522 |
| CEACAM6   | -1.2  | 0.046543 | 0.594 |
| CROCC     | -1.2  | 0.046543 | 0.594 |
| FAM221B   | -1.2  | 0.046543 | 0.594 |
| FGF11     | -1.2  | 0.036059 | 0.522 |
| HLA-DOB   | -1.2  | 0.036059 | 0.522 |
| KLHL28    | -1.2  | 0.036059 | 0.522 |
| NAA60     | -1.2  | 0.036059 | 0.522 |
| NEK1      | -1.2  | 0.036059 | 0.522 |
| PPIL1     | -1.2  | 0.036059 | 0.522 |
| PPM1N     | -1.2  | 0.036059 | 0.522 |
| TCF25     | -1.2  | 0.036059 | 0.522 |
| TMEM57    | -1.2  | 0.036059 | 0.522 |
| UBE3D     | -1.2  | 0.036059 | 0.522 |
| VEZT      | -1.2  | 0.036059 | 0.522 |
| ABCC1     | -1.19 | 0.03756  | 0.53  |
| APOPT1    | -1.19 | 0.037561 | 0.53  |
| BRE       | -1.19 | 0.037561 | 0.53  |
| C10orf131 | -1.19 | 0.037561 | 0.53  |
| CACNA1F   | -1.19 | 0.062037 | 0.653 |
| CDHR2     | -1.19 | 0.037561 | 0.53  |
| CNNM3     | -1.19 | 0.062037 | 0.653 |
| DCAF8     | -1.19 | 0.037561 | 0.53  |
| DERA      | -1.19 | 0.03756  | 0.53  |
| E2F8      | -1.19 | 0.048316 | 0.606 |
| GPR89A    | -1.19 | 0.03756  | 0.53  |
| IFITM2    | -1.19 | 0.03756  | 0.53  |
| KATNB1    | -1.19 | 0.037561 | 0.53  |
| MAPK10    | -1.19 | 0.03756  | 0.53  |
| SEC61A2   | -1.19 | 0.037561 | 0.53  |
| SETD4     | -1.19 | 0.048316 | 0.606 |
| ST20      | -1.19 | 0.136272 | 0.786 |
| ZHX2      | -1.19 | 0.037561 | 0.53  |
| ANGPTL5   | -1.18 | 0.039093 | 0.544 |
| APLF      | -1.18 | 0.039093 | 0.544 |
| DUSP16    | -1.18 | 0.050154 | 0.612 |
| FBXL3     | -1.18 | 0.039093 | 0.544 |
| GLYR1     | -1.18 | 0.039093 | 0.544 |
| MIS18BP1  | -1.18 | 0.050154 | 0.612 |
| MRGPRD    | -1.18 | 0.039093 | 0.544 |
| NBAS      | -1.18 | 0.039093 | 0.544 |
| NXPE1     | -1.18 | 0.050153 | 0.612 |
| POU2F2    | -1.18 | 0.050154 | 0.612 |
| RAET1G    | -1.18 | 0.064132 | 0.667 |
| SH2B1     | -1.18 | 0.039093 | 0.544 |

|          |       |          |       |
|----------|-------|----------|-------|
| SLC25A18 | -1.18 | 0.039093 | 0.544 |
| TMEM174  | -1.18 | 0.050154 | 0.612 |
| WIPI1    | -1.18 | 0.039093 | 0.544 |
| ZNF783   | -1.18 | 0.050154 | 0.612 |
| C1QTNF6  | -1.17 | 0.040704 | 0.547 |
| CAMLG    | -1.17 | 0.040705 | 0.547 |
| CSRP2    | -1.17 | 0.040704 | 0.547 |
| DCTN2    | -1.17 | 0.040705 | 0.547 |
| DUSP6    | -1.17 | 0.040704 | 0.547 |
| ENTPD2   | -1.17 | 0.052052 | 0.622 |
| FAM117B  | -1.17 | 0.040704 | 0.547 |
| HAX1     | -1.17 | 0.040704 | 0.547 |
| HOXA6    | -1.17 | 0.040705 | 0.547 |
| KLF7     | -1.17 | 0.040704 | 0.547 |
| LUZP1    | -1.17 | 0.040704 | 0.547 |
| MAPK8IP2 | -1.17 | 0.040705 | 0.547 |
| MPLKIP   | -1.17 | 0.040704 | 0.547 |
| MRGPRX4  | -1.17 | 0.066298 | 0.667 |
| NTRK1    | -1.17 | 0.052053 | 0.622 |
| PRDM11   | -1.17 | 0.040705 | 0.547 |
| PTPLA    | -1.17 | 0.040704 | 0.547 |
| RPS24    | -1.17 | 0.040705 | 0.547 |
| SAMD9    | -1.17 | 0.040704 | 0.547 |
| TRIB2    | -1.17 | 0.040704 | 0.547 |
| YPEL1    | -1.17 | 0.040705 | 0.547 |
| ALG3     | -1.16 | 0.042387 | 0.56  |
| CRIP1    | -1.16 | 0.042387 | 0.56  |
| ECHDC1   | -1.16 | 0.042387 | 0.56  |
| FCRLA    | -1.16 | 0.042387 | 0.56  |
| FSD2     | -1.16 | 0.042387 | 0.56  |
| ITIH5    | -1.16 | 0.042387 | 0.56  |
| KEAP1    | -1.16 | 0.042387 | 0.56  |
| KIAA0753 | -1.16 | 0.054001 | 0.627 |
| MED31    | -1.16 | 0.042387 | 0.56  |
| NOP14    | -1.16 | 0.042388 | 0.56  |
| PRR22    | -1.16 | 0.042388 | 0.56  |
| STARD7   | -1.16 | 0.054    | 0.627 |
| TCF12    | -1.16 | 0.054001 | 0.627 |
| ZCCHC2   | -1.16 | 0.042388 | 0.56  |
| ZNF318   | -1.16 | 0.042387 | 0.56  |
| BROX     | -1.15 | 0.044094 | 0.573 |
| BTNL9    | -1.15 | 0.044094 | 0.573 |
| CCR1     | -1.15 | 0.044094 | 0.573 |
| FCF1     | -1.15 | 0.044094 | 0.573 |
| FOXL1    | -1.15 | 0.044094 | 0.573 |
| LRCH3    | -1.15 | 0.044094 | 0.573 |
| NAMPT    | -1.15 | 0.055986 | 0.634 |

|           |       |          |       |
|-----------|-------|----------|-------|
| NBEAL1    | -1.15 | 0.055986 | 0.634 |
| NOD1      | -1.15 | 0.044093 | 0.573 |
| TRIP12    | -1.15 | 0.044094 | 0.573 |
| UAP1      | -1.15 | 0.044094 | 0.573 |
| WDR46     | -1.15 | 0.07085  | 0.67  |
| APOA5     | -1.14 | 0.0459   | 0.589 |
| CCDC115   | -1.14 | 0.058059 | 0.635 |
| CCR4      | -1.14 | 0.058058 | 0.635 |
| CHST12    | -1.14 | 0.0459   | 0.589 |
| HHIPL2    | -1.14 | 0.045901 | 0.589 |
| KIF11     | -1.14 | 0.197189 | 0.848 |
| LCP2      | -1.14 | 0.0459   | 0.589 |
| PCNA      | -1.14 | 0.07324  | 0.674 |
| TMTC1     | -1.14 | 0.0459   | 0.589 |
| BCOR      | -1.13 | 0.047761 | 0.601 |
| CCDC28B   | -1.13 | 0.047761 | 0.601 |
| CSNK2A1   | -1.13 | 0.047761 | 0.601 |
| EVPLL     | -1.13 | 0.047761 | 0.601 |
| FAM71E1   | -1.13 | 0.060166 | 0.643 |
| FASN      | -1.13 | 0.047762 | 0.601 |
| KRT1      | -1.13 | 0.047761 | 0.601 |
| NDUFB5    | -1.13 | 0.047761 | 0.601 |
| NUDT2     | -1.13 | 0.047761 | 0.601 |
| OR9Q2     | -1.13 | 0.047761 | 0.601 |
| PTPN22    | -1.13 | 0.060165 | 0.643 |
| RAET1L    | -1.13 | 0.047761 | 0.601 |
| TIAF1     | -1.13 | 0.047761 | 0.601 |
| TIGD5     | -1.13 | 0.060166 | 0.643 |
| ABCC4     | -1.12 | 0.04966  | 0.611 |
| C8orf74   | -1.12 | 0.04966  | 0.611 |
| CACNG4    | -1.12 | 0.04966  | 0.611 |
| CHMP4C    | -1.12 | 0.062384 | 0.653 |
| CREB5     | -1.12 | 0.04966  | 0.611 |
| EXOSC6    | -1.12 | 0.078187 | 0.682 |
| GPN1      | -1.12 | 0.04966  | 0.611 |
| KIAA1109  | -1.12 | 0.04966  | 0.611 |
| KRBA1     | -1.12 | 0.049659 | 0.611 |
| KRTAP19-1 | -1.12 | 0.04966  | 0.611 |
| MARCKSL1  | -1.12 | 0.04966  | 0.611 |
| NDNL2     | -1.12 | 0.062384 | 0.653 |
| PAXIP1    | -1.12 | 0.04966  | 0.611 |
| PDGFD     | -1.12 | 0.04966  | 0.611 |
| PSME3     | -1.12 | 0.04966  | 0.611 |
| PTBP3     | -1.12 | 0.049659 | 0.611 |
| TGFB3     | -1.12 | 0.04966  | 0.611 |
| ZBTB34    | -1.12 | 0.04966  | 0.611 |
| APOBR     | -1.11 | 0.051634 | 0.618 |

|          |       |          |       |
|----------|-------|----------|-------|
| BEND7    | -1.11 | 0.051634 | 0.618 |
| BEX4     | -1.11 | 0.051634 | 0.618 |
| CATSPER4 | -1.11 | 0.051634 | 0.618 |
| ERI2     | -1.11 | 0.051634 | 0.618 |
| ETFB     | -1.11 | 0.051634 | 0.618 |
| FAM91A1  | -1.11 | 0.051635 | 0.618 |
| GPAA1    | -1.11 | 0.051635 | 0.618 |
| ITSN2    | -1.11 | 0.051634 | 0.618 |
| LTBR     | -1.11 | 0.051635 | 0.618 |
| MAGEB2   | -1.11 | 0.051634 | 0.618 |
| MBOAT4   | -1.11 | 0.051634 | 0.618 |
| PLEKHA2  | -1.11 | 0.080735 | 0.69  |
| SMARCC2  | -1.11 | 0.051634 | 0.618 |
| WFDC2    | -1.11 | 0.051634 | 0.618 |
| ADARB1   | -1.1  | 0.066973 | 0.667 |
| ALDH9A1  | -1.1  | 0.066973 | 0.667 |
| CSRNP2   | -1.1  | 0.053672 | 0.626 |
| CYP2C9   | -1.1  | 0.053673 | 0.626 |
| GINS2    | -1.1  | 0.066972 | 0.667 |
| GPR89B   | -1.1  | 0.053672 | 0.626 |
| GPX1     | -1.1  | 0.053672 | 0.626 |
| HNRNPUL2 | -1.1  | 0.053673 | 0.626 |
| HRC      | -1.1  | 0.066973 | 0.667 |
| ITFG2    | -1.1  | 0.053673 | 0.626 |
| LRRC10B  | -1.1  | 0.053673 | 0.626 |
| MT1G     | -1.1  | 0.104346 | 0.74  |
| MTMR4    | -1.1  | 0.053673 | 0.626 |
| NHSL1    | -1.1  | 0.066973 | 0.667 |
| NOX3     | -1.1  | 0.053673 | 0.626 |
| P2RY12   | -1.1  | 0.053673 | 0.626 |
| PAK2     | -1.1  | 0.053673 | 0.626 |
| PDE7B    | -1.1  | 0.066973 | 0.667 |
| RGS12    | -1.1  | 0.053672 | 0.626 |
| STRIP1   | -1.1  | 0.053673 | 0.626 |
| TFRC     | -1.1  | 0.167037 | 0.827 |
| TLR4     | -1.1  | 0.053672 | 0.626 |
| TSC22D4  | -1.1  | 0.053672 | 0.626 |
| WDR7     | -1.1  | 0.053672 | 0.626 |
| ZNF548   | -1.1  | 0.053672 | 0.626 |
| ZNF570   | -1.1  | 0.053672 | 0.626 |
| ACSM3    | -1.09 | 0.055786 | 0.634 |
| AIFM2    | -1.09 | 0.055785 | 0.634 |
| ATP9A    | -1.09 | 0.055786 | 0.634 |
| CEP89    | -1.09 | 0.055785 | 0.634 |
| COQ10A   | -1.09 | 0.055785 | 0.634 |
| GTF2IRD1 | -1.09 | 0.069394 | 0.667 |
| HIVEP3   | -1.09 | 0.069394 | 0.667 |

|          |       |          |       |
|----------|-------|----------|-------|
| LAMA5    | -1.09 | 0.055786 | 0.634 |
| LMX1A    | -1.09 | 0.055786 | 0.634 |
| MAGEB1   | -1.09 | 0.055786 | 0.634 |
| MAP2K1   | -1.09 | 0.055786 | 0.634 |
| MLF1IP   | -1.09 | 0.055785 | 0.634 |
| NAF1     | -1.09 | 0.055785 | 0.634 |
| PAK3     | -1.09 | 0.055785 | 0.634 |
| PCSK2    | -1.09 | 0.055785 | 0.634 |
| PDHB     | -1.09 | 0.055786 | 0.634 |
| PRKAR2A  | -1.09 | 0.069394 | 0.667 |
| RELB     | -1.09 | 0.055785 | 0.634 |
| SLC25A47 | -1.09 | 0.055785 | 0.634 |
| TMEM200B | -1.09 | 0.069394 | 0.667 |
| TUBGCP3  | -1.09 | 0.055785 | 0.634 |
| UCN2     | -1.09 | 0.055785 | 0.634 |
| AP5M1    | -1.08 | 0.057995 | 0.635 |
| ARL5B    | -1.08 | 0.057995 | 0.635 |
| ATOH1    | -1.08 | 0.057995 | 0.635 |
| BET1     | -1.08 | 0.057994 | 0.635 |
| BPIFB2   | -1.08 | 0.057995 | 0.635 |
| C22orf39 | -1.08 | 0.057995 | 0.635 |
| CAP2     | -1.08 | 0.07188  | 0.67  |
| DR1      | -1.08 | 0.057995 | 0.635 |
| ESAM     | -1.08 | 0.057995 | 0.635 |
| FAM46B   | -1.08 | 0.057995 | 0.635 |
| GIF      | -1.08 | 0.057995 | 0.635 |
| LZTR1    | -1.08 | 0.057995 | 0.635 |
| MMP12    | -1.08 | 0.057995 | 0.635 |
| MYH15    | -1.08 | 0.057995 | 0.635 |
| NCOR1    | -1.08 | 0.057995 | 0.635 |
| POMP     | -1.08 | 0.057995 | 0.635 |
| PPP2R2D  | -1.08 | 0.07188  | 0.67  |
| RCOR3    | -1.08 | 0.057995 | 0.635 |
| RNF183   | -1.08 | 0.057995 | 0.635 |
| SLC25A28 | -1.08 | 0.057995 | 0.635 |
| SLC25A46 | -1.08 | 0.057995 | 0.635 |
| SNX4     | -1.08 | 0.057995 | 0.635 |
| STAT2    | -1.08 | 0.07188  | 0.67  |
| TNPO1    | -1.08 | 0.057995 | 0.635 |
| TNRC6A   | -1.08 | 0.057995 | 0.635 |
| TRAT1    | -1.08 | 0.07188  | 0.67  |
| TSSC4    | -1.08 | 0.057995 | 0.635 |
| WDR36    | -1.08 | 0.07188  | 0.67  |
| ARL15    | -1.07 | 0.06028  | 0.643 |
| C16orf86 | -1.07 | 0.060279 | 0.643 |
| DDX54    | -1.07 | 0.074472 | 0.677 |
| DNAI2    | -1.07 | 0.06028  | 0.643 |

|          |       |          |       |
|----------|-------|----------|-------|
| EXT2     | -1.07 | 0.060279 | 0.643 |
| HIST1H1B | -1.07 | 0.06028  | 0.643 |
| HLA-G    | -1.07 | 0.060279 | 0.643 |
| ICMT     | -1.07 | 0.06028  | 0.643 |
| INSM1    | -1.07 | 0.06028  | 0.643 |
| KHDC1L   | -1.07 | 0.06028  | 0.643 |
| KLLN     | -1.07 | 0.060279 | 0.643 |
| LCORL    | -1.07 | 0.060279 | 0.643 |
| NENF     | -1.07 | 0.06028  | 0.643 |
| NOX1     | -1.07 | 0.06028  | 0.643 |
| OPHN1    | -1.07 | 0.060279 | 0.643 |
| OR6K3    | -1.07 | 0.074472 | 0.677 |
| PDHX     | -1.07 | 0.06028  | 0.643 |
| PTTG1    | -1.07 | 0.06028  | 0.643 |
| SEC61A1  | -1.07 | 0.074472 | 0.677 |
| TCERG1   | -1.07 | 0.091736 | 0.714 |
| TMEM209  | -1.07 | 0.074472 | 0.677 |
| TTBK2    | -1.07 | 0.06028  | 0.643 |
| ANAPC11  | -1.06 | 0.094657 | 0.716 |
| ANKH     | -1.06 | 0.062624 | 0.653 |
| ATG9A    | -1.06 | 0.062625 | 0.653 |
| CHAT     | -1.06 | 0.062625 | 0.653 |
| CPA6     | -1.06 | 0.062624 | 0.653 |
| CRKL     | -1.06 | 0.077122 | 0.682 |
| EDC4     | -1.06 | 0.062624 | 0.653 |
| GOLGA5   | -1.06 | 0.062625 | 0.653 |
| HNRNPCL1 | -1.06 | 0.094657 | 0.716 |
| HOXA10   | -1.06 | 0.062625 | 0.653 |
| MAS1L    | -1.06 | 0.077122 | 0.682 |
| MCM4     | -1.06 | 0.062624 | 0.653 |
| METTL6   | -1.06 | 0.062624 | 0.653 |
| NEIL3    | -1.06 | 0.062624 | 0.653 |
| OR4K13   | -1.06 | 0.062624 | 0.653 |
| PHC3     | -1.06 | 0.062624 | 0.653 |
| PPAPDC2  | -1.06 | 0.062624 | 0.653 |
| PROSER3  | -1.06 | 0.062625 | 0.653 |
| PRTG     | -1.06 | 0.062624 | 0.653 |
| RESP18   | -1.06 | 0.062625 | 0.653 |
| ZNF491   | -1.06 | 0.062624 | 0.653 |
| ZYX      | -1.06 | 0.077121 | 0.682 |
| BDH1     | -1.05 | 0.065045 | 0.667 |
| CBY1     | -1.05 | 0.065044 | 0.667 |
| CCDC18   | -1.05 | 0.233195 | 0.874 |
| CITED2   | -1.05 | 0.065044 | 0.667 |
| CYSTM1   | -1.05 | 0.065044 | 0.667 |
| ENTPD6   | -1.05 | 0.065045 | 0.667 |
| GPR161   | -1.05 | 0.065044 | 0.667 |

|            |       |          |       |
|------------|-------|----------|-------|
| SHOX2      | -1.05 | 0.097691 | 0.726 |
| SIX2       | -1.05 | 0.079831 | 0.69  |
| SPTLC2     | -1.05 | 0.065044 | 0.667 |
| TAF1C      | -1.05 | 0.065044 | 0.667 |
| USP21      | -1.05 | 0.065044 | 0.667 |
| ZFAT       | -1.05 | 0.065044 | 0.667 |
| AAMDC      | -1.04 | 0.067525 | 0.667 |
| AVIL       | -1.04 | 0.067526 | 0.667 |
| BTBD18     | -1.04 | 0.067525 | 0.667 |
| CDK5       | -1.04 | 0.067525 | 0.667 |
| CEP128     | -1.04 | 0.067525 | 0.667 |
| CLPSL1     | -1.04 | 0.082659 | 0.692 |
| DHPS       | -1.04 | 0.082659 | 0.692 |
| DUSP23     | -1.04 | 0.082659 | 0.692 |
| EPN1       | -1.04 | 0.067525 | 0.667 |
| GINS4      | -1.04 | 0.08266  | 0.692 |
| GPR135     | -1.04 | 0.067525 | 0.667 |
| HCFC1R1    | -1.04 | 0.08266  | 0.692 |
| IL19       | -1.04 | 0.067526 | 0.667 |
| KRTAP11-1  | -1.04 | 0.067525 | 0.667 |
| KRTAP6-3   | -1.04 | 0.08266  | 0.692 |
| LYZL1      | -1.04 | 0.067526 | 0.667 |
| MAGEE1     | -1.04 | 0.067525 | 0.667 |
| MAL2       | -1.04 | 0.153088 | 0.807 |
| MFSD5      | -1.04 | 0.067525 | 0.667 |
| MPC2       | -1.04 | 0.067525 | 0.667 |
| MUC21      | -1.04 | 0.067525 | 0.667 |
| NDUFA7     | -1.04 | 0.067525 | 0.667 |
| NOS3       | -1.04 | 0.067525 | 0.667 |
| PCDHGA5    | -1.04 | 0.08266  | 0.692 |
| PIDD       | -1.04 | 0.067525 | 0.667 |
| PRR25      | -1.04 | 0.067526 | 0.667 |
| PSPN       | -1.04 | 0.067525 | 0.667 |
| RPL17-C18c | -1.04 | 0.067525 | 0.667 |
| RSRC1      | -1.04 | 0.067525 | 0.667 |
| SH3TC2     | -1.04 | 0.067526 | 0.667 |
| SLC18B1    | -1.04 | 0.067525 | 0.667 |
| TBC1D10B   | -1.04 | 0.067525 | 0.667 |
| TMEM87B    | -1.04 | 0.067525 | 0.667 |
| UBL3       | -1.04 | 0.067525 | 0.667 |
| ZBTB12     | -1.04 | 0.067525 | 0.667 |
| ZSCAN1     | -1.04 | 0.067525 | 0.667 |
| ATP1B4     | -1.03 | 0.070079 | 0.667 |
| C1orf74    | -1.03 | 0.070079 | 0.667 |
| C9orf92    | -1.03 | 0.070079 | 0.667 |
| CCDC6      | -1.03 | 0.070079 | 0.667 |
| ERLIN2     | -1.03 | 0.070078 | 0.667 |

|           |       |          |       |
|-----------|-------|----------|-------|
| FASTKD5   | -1.03 | 0.070079 | 0.667 |
| FOXI2     | -1.03 | 0.070078 | 0.667 |
| GDF9      | -1.03 | 0.070078 | 0.667 |
| GMCL1     | -1.03 | 0.085513 | 0.698 |
| GNAI2     | -1.03 | 0.070079 | 0.667 |
| HPR       | -1.03 | 0.070078 | 0.667 |
| HPS4      | -1.03 | 0.070079 | 0.667 |
| IRAK1     | -1.03 | 0.070079 | 0.667 |
| LRRC16B   | -1.03 | 0.085513 | 0.698 |
| MAP3K8    | -1.03 | 0.070079 | 0.667 |
| MIP       | -1.03 | 0.070079 | 0.667 |
| NF1       | -1.03 | 0.070079 | 0.667 |
| PBRM1     | -1.03 | 0.070079 | 0.667 |
| PCID2     | -1.03 | 0.070079 | 0.667 |
| PPP2R4    | -1.03 | 0.070078 | 0.667 |
| PRAMEF10  | -1.03 | 0.070079 | 0.667 |
| RBM12B    | -1.03 | 0.070079 | 0.667 |
| RNF20     | -1.03 | 0.085513 | 0.698 |
| RRP8      | -1.03 | 0.070079 | 0.667 |
| SERPINA11 | -1.03 | 0.070078 | 0.667 |
| SFTA3     | -1.03 | 0.070079 | 0.667 |
| SPDYE3    | -1.03 | 0.070079 | 0.667 |
| SPRR3     | -1.03 | 0.070079 | 0.667 |
| SPTSSA    | -1.03 | 0.070079 | 0.667 |
| TENM4     | -1.03 | 0.070078 | 0.667 |
| THNSL1    | -1.03 | 0.070079 | 0.667 |
| TRPM6     | -1.03 | 0.070079 | 0.667 |
| USP8      | -1.03 | 0.070079 | 0.667 |
| ZCCHC16   | -1.03 | 0.070079 | 0.667 |
| ZDHHC15   | -1.03 | 0.070078 | 0.667 |
| AKAP3     | -1.02 | 0.072739 | 0.67  |
| AMIGO3    | -1.02 | 0.072739 | 0.67  |
| ATG4D     | -1.02 | 0.072738 | 0.67  |
| C11orf57  | -1.02 | 0.072739 | 0.67  |
| CNTN6     | -1.02 | 0.072739 | 0.67  |
| CYP39A1   | -1.02 | 0.072739 | 0.67  |
| DDX26B    | -1.02 | 0.072739 | 0.67  |
| DHRS4     | -1.02 | 0.072739 | 0.67  |
| DKC1      | -1.02 | 0.130875 | 0.782 |
| DRG1      | -1.02 | 0.088473 | 0.706 |
| GNG4      | -1.02 | 0.072739 | 0.67  |
| GPR158    | -1.02 | 0.072739 | 0.67  |
| HEBP2     | -1.02 | 0.072739 | 0.67  |
| INVS      | -1.02 | 0.072739 | 0.67  |
| KDM5A     | -1.02 | 0.072739 | 0.67  |
| LACTB2    | -1.02 | 0.072739 | 0.67  |
| LSM6      | -1.02 | 0.107281 | 0.748 |

|         |       |          |       |
|---------|-------|----------|-------|
| MCM8    | -1.02 | 0.072739 | 0.67  |
| MGST1   | -1.02 | 0.072739 | 0.67  |
| MYO1B   | -1.02 | 0.072739 | 0.67  |
| NR1D1   | -1.02 | 0.072739 | 0.67  |
| OR10A7  | -1.02 | 0.072739 | 0.67  |
| OR1N2   | -1.02 | 0.072739 | 0.67  |
| OR7G2   | -1.02 | 0.072739 | 0.67  |
| PEPD    | -1.02 | 0.072738 | 0.67  |
| PSTK    | -1.02 | 0.072739 | 0.67  |
| SLC29A2 | -1.02 | 0.088472 | 0.706 |
| SLC35C1 | -1.02 | 0.072739 | 0.67  |
| SRSF10  | -1.02 | 0.107281 | 0.748 |
| STAC2   | -1.02 | 0.072739 | 0.67  |
| VGLL4   | -1.02 | 0.072739 | 0.67  |
| WDR55   | -1.02 | 0.088472 | 0.706 |
| AMPD2   | -1.01 | 0.075489 | 0.677 |
| ATP2A2  | -1.01 | 0.091452 | 0.712 |
| BAZ2B   | -1.01 | 0.07549  | 0.677 |
| CCDC88B | -1.01 | 0.07549  | 0.677 |
| COG8    | -1.01 | 0.075489 | 0.677 |
| CPNE1   | -1.01 | 0.07549  | 0.677 |
| CXCR2   | -1.01 | 0.075489 | 0.677 |
| DDX47   | -1.01 | 0.134524 | 0.786 |
| DIO3    | -1.01 | 0.07549  | 0.677 |
| FGFBP3  | -1.01 | 0.091451 | 0.712 |
| HOMER3  | -1.01 | 0.07549  | 0.677 |
| HOXC13  | -1.01 | 0.07549  | 0.677 |
| IGF2R   | -1.01 | 0.07549  | 0.677 |
| LEPR    | -1.01 | 0.07549  | 0.677 |
| MAP2K3  | -1.01 | 0.091452 | 0.712 |
| NOTCH4  | -1.01 | 0.091452 | 0.712 |
| NUP188  | -1.01 | 0.091452 | 0.712 |
| PRR3    | -1.01 | 0.07549  | 0.677 |
| RANBP1  | -1.01 | 0.07549  | 0.677 |
| RIN3    | -1.01 | 0.07549  | 0.677 |
| SDHA    | -1.01 | 0.07549  | 0.677 |
| SFT2D1  | -1.01 | 0.07549  | 0.677 |
| SPEN    | -1.01 | 0.07549  | 0.677 |
| SRSF5   | -1.01 | 0.07549  | 0.677 |
| TRIM11  | -1.01 | 0.07549  | 0.677 |
| UBA5    | -1.01 | 0.075489 | 0.677 |
| UBE2D2  | -1.01 | 0.07549  | 0.677 |
| ZCCHC9  | -1.01 | 0.07549  | 0.677 |
| ZNF14   | -1.01 | 0.07549  | 0.677 |
| ZNF488  | -1.01 | 0.091452 | 0.712 |
| ABCB9   | -1    | 0.094596 | 0.716 |
| ATXN10  | -1    | 0.094596 | 0.716 |

|          |       |          |       |
|----------|-------|----------|-------|
| C1orf68  | -1    | 0.078305 | 0.682 |
| C22orf15 | -1    | 0.078305 | 0.682 |
| CCDC68   | -1    | 0.078305 | 0.682 |
| CHMP6    | -1    | 0.078305 | 0.682 |
| CISD3    | -1    | 0.078305 | 0.682 |
| CLIC4    | -1    | 0.078305 | 0.682 |
| COL4A4   | -1    | 0.078305 | 0.682 |
| DEFB115  | -1    | 0.094596 | 0.716 |
| FAM195B  | -1    | 0.094596 | 0.716 |
| FRS3     | -1    | 0.078305 | 0.682 |
| GEMIN8   | -1    | 0.094596 | 0.716 |
| IPCEF1   | -1    | 0.078305 | 0.682 |
| KLHDC7B  | -1    | 0.078305 | 0.682 |
| LCE2D    | -1    | 0.078305 | 0.682 |
| LIPT1    | -1    | 0.078305 | 0.682 |
| MAFF     | -1    | 0.078305 | 0.682 |
| MAP3K7   | -1    | 0.078305 | 0.682 |
| MAP4K5   | -1    | 0.078305 | 0.682 |
| OR2AP1   | -1    | 0.078305 | 0.682 |
| OR5C1    | -1    | 0.078305 | 0.682 |
| PACS1    | -1    | 0.094596 | 0.716 |
| PLCL1    | -1    | 0.078305 | 0.682 |
| RRBP1    | -1    | 0.078305 | 0.682 |
| SEPT14   | -1    | 0.078305 | 0.682 |
| SMC6     | -1    | 0.078305 | 0.682 |
| SMO      | -1    | 0.078305 | 0.682 |
| TET1     | -1    | 0.078305 | 0.682 |
| THEMIS   | -1    | 0.078305 | 0.682 |
| TMCO6    | -1    | 0.078305 | 0.682 |
| TPST1    | -1    | 0.078305 | 0.682 |
| ZNF468   | -1    | 0.078305 | 0.682 |
| BCAN     | -0.99 | 0.081206 | 0.69  |
| C17orf78 | -0.99 | 0.081206 | 0.69  |
| C6orf141 | -0.99 | 0.081206 | 0.69  |
| C9orf37  | -0.99 | 0.081206 | 0.69  |
| CORO2B   | -0.99 | 0.081206 | 0.69  |
| CWC25    | -0.99 | 0.081205 | 0.69  |
| DDX6     | -0.99 | 0.081206 | 0.69  |
| DNM1L    | -0.99 | 0.11766  | 0.763 |
| DRP2     | -0.99 | 0.081206 | 0.69  |
| DSCC1    | -0.99 | 0.081206 | 0.69  |
| DTX4     | -0.99 | 0.081206 | 0.69  |
| F8A3     | -0.99 | 0.081206 | 0.69  |
| KRT9     | -0.99 | 0.097794 | 0.726 |
| METTL4   | -0.99 | 0.081206 | 0.69  |
| MGA      | -0.99 | 0.081206 | 0.69  |
| MIB1     | -0.99 | 0.081205 | 0.69  |

|           |       |          |       |
|-----------|-------|----------|-------|
| OR2M4     | -0.99 | 0.081205 | 0.69  |
| PHTF1     | -0.99 | 0.081206 | 0.69  |
| PIP4K2B   | -0.99 | 0.097794 | 0.726 |
| PTH2      | -0.99 | 0.081206 | 0.69  |
| SEMA5B    | -0.99 | 0.081206 | 0.69  |
| SMIM9     | -0.99 | 0.081206 | 0.69  |
| SP9       | -0.99 | 0.081206 | 0.69  |
| SULT2B1   | -0.99 | 0.081205 | 0.69  |
| TBC1D15   | -0.99 | 0.081206 | 0.69  |
| ZNF676    | -0.99 | 0.081206 | 0.69  |
| ABCF2     | -0.98 | 0.08421  | 0.692 |
| AP1M2     | -0.98 | 0.08421  | 0.692 |
| ARHGEF38  | -0.98 | 0.084209 | 0.692 |
| ATAD3C    | -0.98 | 0.084209 | 0.692 |
| BIRC2     | -0.98 | 0.101146 | 0.734 |
| C3orf43   | -0.98 | 0.08421  | 0.692 |
| CCDC132   | -0.98 | 0.08421  | 0.692 |
| CDK2AP2   | -0.98 | 0.084209 | 0.692 |
| CIC       | -0.98 | 0.084209 | 0.692 |
| CNIH2     | -0.98 | 0.084209 | 0.692 |
| CSTB      | -0.98 | 0.08421  | 0.692 |
| DEFB106A  | -0.98 | 0.084209 | 0.692 |
| DEFB106B  | -0.98 | 0.084209 | 0.692 |
| DHX8      | -0.98 | 0.121284 | 0.772 |
| DYM       | -0.98 | 0.084209 | 0.692 |
| ETV3L     | -0.98 | 0.084209 | 0.692 |
| F8A1      | -0.98 | 0.084209 | 0.692 |
| F8A2      | -0.98 | 0.08421  | 0.692 |
| FBXL14    | -0.98 | 0.084209 | 0.692 |
| GPRC5C    | -0.98 | 0.084209 | 0.692 |
| HABP4     | -0.98 | 0.08421  | 0.692 |
| HNRNPA1L2 | -0.98 | 0.08421  | 0.692 |
| KIRREL3   | -0.98 | 0.08421  | 0.692 |
| LRIG1     | -0.98 | 0.101146 | 0.734 |
| MED4      | -0.98 | 0.084209 | 0.692 |
| MXRA7     | -0.98 | 0.08421  | 0.692 |
| PLEKHA6   | -0.98 | 0.084209 | 0.692 |
| RPL18A    | -0.98 | 0.08421  | 0.692 |
| RTP4      | -0.98 | 0.084209 | 0.692 |
| SPOP      | -0.98 | 0.08421  | 0.692 |
| SULT2A1   | -0.98 | 0.084209 | 0.692 |
| TRAPPC8   | -0.98 | 0.101145 | 0.734 |
| USP7      | -0.98 | 0.101146 | 0.734 |
| VTI1B     | -0.98 | 0.08421  | 0.692 |
| ZGLP1     | -0.98 | 0.121284 | 0.772 |
| ZNF791    | -0.98 | 0.084209 | 0.692 |
| ARPC3     | -0.97 | 0.087285 | 0.698 |

|          |       |          |       |
|----------|-------|----------|-------|
| B4GALT5  | -0.97 | 0.087285 | 0.698 |
| BET1L    | -0.97 | 0.087285 | 0.698 |
| C2CD5    | -0.97 | 0.087285 | 0.698 |
| CALML4   | -0.97 | 0.124979 | 0.779 |
| CCDC12   | -0.97 | 0.10453  | 0.74  |
| CCNJL    | -0.97 | 0.087285 | 0.698 |
| CHMP2A   | -0.97 | 0.149992 | 0.804 |
| CNGA3    | -0.97 | 0.087285 | 0.698 |
| DNPH1    | -0.97 | 0.087286 | 0.698 |
| EEFSEC   | -0.97 | 0.087286 | 0.698 |
| FAM19A2  | -0.97 | 0.087285 | 0.698 |
| FCRLB    | -0.97 | 0.10453  | 0.74  |
| GATA1    | -0.97 | 0.10453  | 0.74  |
| GRM1     | -0.97 | 0.087285 | 0.698 |
| H1FX     | -0.97 | 0.087285 | 0.698 |
| HEXB     | -0.97 | 0.087285 | 0.698 |
| IFIT1    | -0.97 | 0.087285 | 0.698 |
| ITGA9    | -0.97 | 0.087285 | 0.698 |
| MTRNR2L4 | -0.97 | 0.269198 | 0.888 |
| MYLK     | -0.97 | 0.087285 | 0.698 |
| NEDD8    | -0.97 | 0.10453  | 0.74  |
| NTMT1    | -0.97 | 0.087285 | 0.698 |
| OR51T1   | -0.97 | 0.087285 | 0.698 |
| OSGEP    | -0.97 | 0.104529 | 0.74  |
| PADI2    | -0.97 | 0.087285 | 0.698 |
| PRORY    | -0.97 | 0.087285 | 0.698 |
| PSAPL1   | -0.97 | 0.087286 | 0.698 |
| RSPH3    | -0.97 | 0.087285 | 0.698 |
| SEMA3E   | -0.97 | 0.087285 | 0.698 |
| SENP6    | -0.97 | 0.087285 | 0.698 |
| SFI1     | -0.97 | 0.087285 | 0.698 |
| SH3GL1   | -0.97 | 0.10453  | 0.74  |
| SLC25A42 | -0.97 | 0.087285 | 0.698 |
| SPINK13  | -0.97 | 0.087285 | 0.698 |
| TTLL2    | -0.97 | 0.087285 | 0.698 |
| ZMYM2    | -0.97 | 0.087285 | 0.698 |
| ALKBH7   | -0.96 | 0.090499 | 0.708 |
| APOOL    | -0.96 | 0.090499 | 0.708 |
| C15orf54 | -0.96 | 0.090499 | 0.708 |
| CCDC154  | -0.96 | 0.090499 | 0.708 |
| CDK11B   | -0.96 | 0.090499 | 0.708 |
| CHMP5    | -0.96 | 0.090499 | 0.708 |
| CTPS1    | -0.96 | 0.154108 | 0.807 |
| CYB5R4   | -0.96 | 0.090499 | 0.708 |
| DLD      | -0.96 | 0.10798  | 0.748 |
| DNAJB11  | -0.96 | 0.090499 | 0.708 |
| EIF3F    | -0.96 | 0.090499 | 0.708 |

|           |       |          |       |
|-----------|-------|----------|-------|
| EIF4G3    | -0.96 | 0.090499 | 0.708 |
| FXVD5     | -0.96 | 0.10798  | 0.748 |
| GATS      | -0.96 | 0.10798  | 0.748 |
| IL12B     | -0.96 | 0.090499 | 0.708 |
| PLXDC2    | -0.96 | 0.090499 | 0.708 |
| POM121    | -0.96 | 0.090499 | 0.708 |
| PRSS16    | -0.96 | 0.090499 | 0.708 |
| RIPPLY2   | -0.96 | 0.090499 | 0.708 |
| RTEL1     | -0.96 | 0.090499 | 0.708 |
| SIGLEC1   | -0.96 | 0.090499 | 0.708 |
| SPATA31D1 | -0.96 | 0.10798  | 0.748 |
| TMUB1     | -0.96 | 0.090499 | 0.708 |
| TNPO2     | -0.96 | 0.090499 | 0.708 |
| UBQLNL    | -0.96 | 0.090499 | 0.708 |
| ZCWPW2    | -0.96 | 0.090499 | 0.708 |
| ZDHHC4    | -0.96 | 0.090499 | 0.708 |
| ZNF407    | -0.96 | 0.090499 | 0.708 |
| ARHGAP31  | -0.95 | 0.093755 | 0.714 |
| BRSK1     | -0.95 | 0.093754 | 0.714 |
| CCDC41    | -0.95 | 0.111573 | 0.753 |
| CD207     | -0.95 | 0.111573 | 0.753 |
| CXADR     | -0.95 | 0.093754 | 0.714 |
| ENTPD7    | -0.95 | 0.093754 | 0.714 |
| EXOC8     | -0.95 | 0.111573 | 0.753 |
| FEN1      | -0.95 | 0.093755 | 0.714 |
| GTF3A     | -0.95 | 0.093755 | 0.714 |
| HMMR      | -0.95 | 0.093754 | 0.714 |
| LRRC71    | -0.95 | 0.111572 | 0.753 |
| MAGOH     | -0.95 | 0.111572 | 0.753 |
| MAP4      | -0.95 | 0.093755 | 0.714 |
| MORN2     | -0.95 | 0.1583   | 0.815 |
| MROH2A    | -0.95 | 0.093755 | 0.714 |
| N4BP2L2   | -0.95 | 0.093754 | 0.714 |
| NLN       | -0.95 | 0.093755 | 0.714 |
| OR10H2    | -0.95 | 0.093754 | 0.714 |
| PARP1     | -0.95 | 0.093754 | 0.714 |
| PRPF40A   | -0.95 | 0.093755 | 0.714 |
| RBM22     | -0.95 | 0.111572 | 0.753 |
| RPL7A     | -0.95 | 0.22995  | 0.871 |
| RPP21     | -0.95 | 0.093755 | 0.714 |
| SEL1L3    | -0.95 | 0.093754 | 0.714 |
| SLC25A19  | -0.95 | 0.093755 | 0.714 |
| SPRR1A    | -0.95 | 0.093754 | 0.714 |
| SYT3      | -0.95 | 0.093755 | 0.714 |
| TCP10L2   | -0.95 | 0.093755 | 0.714 |
| UGT3A1    | -0.95 | 0.093754 | 0.714 |
| USP37     | -0.95 | 0.093754 | 0.714 |

|          |       |          |       |
|----------|-------|----------|-------|
| ZCCHC5   | -0.95 | 0.093755 | 0.714 |
| ZNF281   | -0.95 | 0.093755 | 0.714 |
| ZNF554   | -0.95 | 0.093755 | 0.714 |
| BOD1     | -0.94 | 0.097148 | 0.723 |
| C11orf95 | -0.94 | 0.097148 | 0.723 |
| C15orf26 | -0.94 | 0.097148 | 0.723 |
| CPSF3L   | -0.94 | 0.097148 | 0.723 |
| CXorf51A | -0.94 | 0.097148 | 0.723 |
| DAB1     | -0.94 | 0.097148 | 0.723 |
| EBF3     | -0.94 | 0.097148 | 0.723 |
| ECEL1    | -0.94 | 0.115212 | 0.762 |
| ELK3     | -0.94 | 0.097148 | 0.723 |
| ERCC5    | -0.94 | 0.097148 | 0.723 |
| ESYT1    | -0.94 | 0.097148 | 0.723 |
| FKBP8    | -0.94 | 0.097148 | 0.723 |
| FXVD3    | -0.94 | 0.115212 | 0.762 |
| HTR1F    | -0.94 | 0.097148 | 0.723 |
| KCTD11   | -0.94 | 0.097148 | 0.723 |
| OTOP1    | -0.94 | 0.097148 | 0.723 |
| PCDHGC3  | -0.94 | 0.097148 | 0.723 |
| PGLYRP2  | -0.94 | 0.115212 | 0.762 |
| PI4KA    | -0.94 | 0.097148 | 0.723 |
| PIK3R3   | -0.94 | 0.097148 | 0.723 |
| ROCK2    | -0.94 | 0.115212 | 0.762 |
| SERHL2   | -0.94 | 0.115212 | 0.762 |
| SPCS2    | -0.94 | 0.097148 | 0.723 |
| SRPRB    | -0.94 | 0.097148 | 0.723 |
| SUPT16H  | -0.94 | 0.136599 | 0.786 |
| TCF19    | -0.94 | 0.097148 | 0.723 |
| TRAF2    | -0.94 | 0.115212 | 0.762 |
| VPS37B   | -0.94 | 0.136599 | 0.786 |
| WDR33    | -0.94 | 0.16258  | 0.822 |
| ZNF746   | -0.94 | 0.115212 | 0.762 |
| BCL9     | -0.93 | 0.100589 | 0.732 |
| CALCRL   | -0.93 | 0.100589 | 0.732 |
| CCNL1    | -0.93 | 0.100589 | 0.732 |
| CD300C   | -0.93 | 0.118956 | 0.763 |
| COG1     | -0.93 | 0.100589 | 0.732 |
| CXorf51B | -0.93 | 0.100589 | 0.732 |
| DPH3     | -0.93 | 0.100589 | 0.732 |
| DYTN     | -0.93 | 0.100589 | 0.732 |
| EIF3J    | -0.93 | 0.118956 | 0.763 |
| ETHE1    | -0.93 | 0.10059  | 0.732 |
| GGT6     | -0.93 | 0.118955 | 0.763 |
| JPH2     | -0.93 | 0.100589 | 0.732 |
| LENG1    | -0.93 | 0.118955 | 0.763 |
| LY6G6F   | -0.93 | 0.14064  | 0.789 |

|           |       |          |       |
|-----------|-------|----------|-------|
| MBD3      | -0.93 | 0.100589 | 0.732 |
| ME1       | -0.93 | 0.118956 | 0.763 |
| MFSD10    | -0.93 | 0.10059  | 0.732 |
| MGST2     | -0.93 | 0.100589 | 0.732 |
| MSS51     | -0.93 | 0.100589 | 0.732 |
| NAA35     | -0.93 | 0.10059  | 0.732 |
| NARS      | -0.93 | 0.118955 | 0.763 |
| NEU2      | -0.93 | 0.10059  | 0.732 |
| NLE1      | -0.93 | 0.199422 | 0.848 |
| OSGIN1    | -0.93 | 0.100589 | 0.732 |
| PHKA1     | -0.93 | 0.10059  | 0.732 |
| PRR15     | -0.93 | 0.100589 | 0.732 |
| RNF182    | -0.93 | 0.10059  | 0.732 |
| RPS6KA5   | -0.93 | 0.118955 | 0.763 |
| RSG1      | -0.93 | 0.10059  | 0.732 |
| SEC14L5   | -0.93 | 0.100589 | 0.732 |
| SLC38A3   | -0.93 | 0.100589 | 0.732 |
| SNAP91    | -0.93 | 0.118955 | 0.763 |
| STARD13   | -0.93 | 0.100589 | 0.732 |
| SULT4A1   | -0.93 | 0.100589 | 0.732 |
| ZNF490    | -0.93 | 0.100589 | 0.732 |
| APOA1     | -0.92 | 0.104191 | 0.74  |
| ATF7IP    | -0.92 | 0.104191 | 0.74  |
| ATP6V0B   | -0.92 | 0.122846 | 0.772 |
| C12orf68  | -0.92 | 0.104191 | 0.74  |
| C12orf76  | -0.92 | 0.104191 | 0.74  |
| C17orf67  | -0.92 | 0.104191 | 0.74  |
| CDCA7L    | -0.92 | 0.104192 | 0.74  |
| CNTNAP1   | -0.92 | 0.104191 | 0.74  |
| CYP2A13   | -0.92 | 0.104191 | 0.74  |
| DPYSL2    | -0.92 | 0.104192 | 0.74  |
| EFCAB14   | -0.92 | 0.104191 | 0.74  |
| EYA1      | -0.92 | 0.122846 | 0.772 |
| FEM1B     | -0.92 | 0.104191 | 0.74  |
| GRIP1     | -0.92 | 0.104192 | 0.74  |
| HIST1H2AK | -0.92 | 0.104191 | 0.74  |
| HM13      | -0.92 | 0.104191 | 0.74  |
| INTS3     | -0.92 | 0.171313 | 0.827 |
| LOC100287 | -0.92 | 0.104191 | 0.74  |
| LSM4      | -0.92 | 0.122846 | 0.772 |
| LUC7L     | -0.92 | 0.122846 | 0.772 |
| NOM1      | -0.92 | 0.144825 | 0.795 |
| OCM       | -0.92 | 0.104191 | 0.74  |
| PALM2     | -0.92 | 0.104191 | 0.74  |
| PSMG2     | -0.92 | 0.104191 | 0.74  |
| RACGAP1   | -0.92 | 0.122845 | 0.772 |
| RALGAPA2  | -0.92 | 0.104191 | 0.74  |

|           |       |          |       |
|-----------|-------|----------|-------|
| RDH11     | -0.92 | 0.104191 | 0.74  |
| RGR       | -0.92 | 0.122846 | 0.772 |
| RPL17     | -0.92 | 0.104192 | 0.74  |
| RPS6      | -0.92 | 0.204119 | 0.858 |
| SPATA6L   | -0.92 | 0.104192 | 0.74  |
| SSH2      | -0.92 | 0.122846 | 0.772 |
| TOE1      | -0.92 | 0.122846 | 0.772 |
| TTF1      | -0.92 | 0.104191 | 0.74  |
| ZBTB5     | -0.92 | 0.104192 | 0.74  |
| ZCCHC4    | -0.92 | 0.122846 | 0.772 |
| ZNF709    | -0.92 | 0.122846 | 0.772 |
| CCDC43    | -0.91 | 0.126812 | 0.779 |
| CDH6      | -0.91 | 0.107854 | 0.748 |
| CETN2     | -0.91 | 0.107854 | 0.748 |
| CKLF-CMTM | -0.91 | 0.107854 | 0.748 |
| DEPTOR    | -0.91 | 0.107854 | 0.748 |
| EEPD1     | -0.91 | 0.107854 | 0.748 |
| FAM69C    | -0.91 | 0.107854 | 0.748 |
| FAM71F1   | -0.91 | 0.107854 | 0.748 |
| GATSL3    | -0.91 | 0.107854 | 0.748 |
| GTF3C3    | -0.91 | 0.107854 | 0.748 |
| HTR1A     | -0.91 | 0.126812 | 0.779 |
| ITGA10    | -0.91 | 0.107854 | 0.748 |
| KCNJ10    | -0.91 | 0.107854 | 0.748 |
| LGALS3    | -0.91 | 0.126811 | 0.779 |
| NOTO      | -0.91 | 0.107854 | 0.748 |
| OCRL      | -0.91 | 0.107854 | 0.748 |
| PPP1R3B   | -0.91 | 0.107854 | 0.748 |
| PRPS1L1   | -0.91 | 0.107854 | 0.748 |
| SFT2D3    | -0.91 | 0.107854 | 0.748 |
| SH2D2A    | -0.91 | 0.107854 | 0.748 |
| SLC26A11  | -0.91 | 0.126812 | 0.779 |
| SNX27     | -0.91 | 0.107854 | 0.748 |
| SRP68     | -0.91 | 0.107854 | 0.748 |
| TUBGCP5   | -0.91 | 0.126812 | 0.779 |
| UBD       | -0.91 | 0.107854 | 0.748 |
| UNC13A    | -0.91 | 0.107854 | 0.748 |
| WDR20     | -0.91 | 0.107854 | 0.748 |
| ZAN       | -0.91 | 0.107854 | 0.748 |
| ZNF226    | -0.91 | 0.107854 | 0.748 |
| ABCE1     | -0.9  | 0.1309   | 0.782 |
| ADRB1     | -0.9  | 0.130901 | 0.782 |
| ANKRD36   | -0.9  | 0.111642 | 0.753 |
| CAPNS2    | -0.9  | 0.15349  | 0.807 |
| CD33      | -0.9  | 0.111642 | 0.753 |
| CELF4     | -0.9  | 0.111642 | 0.753 |
| COL9A3    | -0.9  | 0.111642 | 0.753 |

|           |       |          |       |
|-----------|-------|----------|-------|
| DACT2     | -0.9  | 0.111642 | 0.753 |
| DENND4B   | -0.9  | 0.111642 | 0.753 |
| DMP1      | -0.9  | 0.111642 | 0.753 |
| E2F2      | -0.9  | 0.130901 | 0.782 |
| ETV7      | -0.9  | 0.1309   | 0.782 |
| FBXO31    | -0.9  | 0.111642 | 0.753 |
| FBXO42    | -0.9  | 0.111642 | 0.753 |
| FGF8      | -0.9  | 0.111642 | 0.753 |
| FOXF2     | -0.9  | 0.1309   | 0.782 |
| FUZ       | -0.9  | 0.111642 | 0.753 |
| GPR141    | -0.9  | 0.111642 | 0.753 |
| HP1BP3    | -0.9  | 0.111642 | 0.753 |
| LRBA      | -0.9  | 0.111643 | 0.753 |
| MRGPRX1   | -0.9  | 0.111642 | 0.753 |
| NAPA      | -0.9  | 0.180546 | 0.838 |
| NPIP4     | -0.9  | 0.153489 | 0.807 |
| NTN1      | -0.9  | 0.111642 | 0.753 |
| OR4A15    | -0.9  | 0.111642 | 0.753 |
| OR51F2    | -0.9  | 0.111642 | 0.753 |
| PPIAL4B   | -0.9  | 0.180546 | 0.838 |
| PSME2     | -0.9  | 0.111642 | 0.753 |
| PTPRG     | -0.9  | 0.111643 | 0.753 |
| RBM14     | -0.9  | 0.1309   | 0.782 |
| RBM14-RBM | -0.9  | 0.130901 | 0.782 |
| RHPN2     | -0.9  | 0.111643 | 0.753 |
| RNF144A   | -0.9  | 0.111642 | 0.753 |
| RQCD1     | -0.9  | 0.130901 | 0.782 |
| SETX      | -0.9  | 0.130901 | 0.782 |
| SPATA22   | -0.9  | 0.111643 | 0.753 |
| STX17     | -0.9  | 0.111642 | 0.753 |
| TEX9      | -0.9  | 0.111642 | 0.753 |
| TOP2B     | -0.9  | 0.111642 | 0.753 |
| TTC27     | -0.9  | 0.15349  | 0.807 |
| TUBA3E    | -0.9  | 0.130901 | 0.782 |
| WDR82     | -0.9  | 0.111642 | 0.753 |
| ZFP69     | -0.9  | 0.111642 | 0.753 |
| ZNF512B   | -0.9  | 0.111642 | 0.753 |
| ARHGAP11E | -0.89 | 0.115548 | 0.762 |
| ASB17     | -0.89 | 0.115549 | 0.762 |
| C5orf38   | -0.89 | 0.115548 | 0.762 |
| C8orf47   | -0.89 | 0.115549 | 0.762 |
| CCL5      | -0.89 | 0.115548 | 0.762 |
| CHRD12    | -0.89 | 0.115548 | 0.762 |
| DYNLRB1   | -0.89 | 0.115548 | 0.762 |
| DYNLT1    | -0.89 | 0.115548 | 0.762 |
| FAM126A   | -0.89 | 0.135062 | 0.786 |
| GNRH1     | -0.89 | 0.115548 | 0.762 |

|           |       |          |       |
|-----------|-------|----------|-------|
| GRAMD4    | -0.89 | 0.135061 | 0.786 |
| GSPT2     | -0.89 | 0.115549 | 0.762 |
| HHATL     | -0.89 | 0.115548 | 0.762 |
| KAZN      | -0.89 | 0.115548 | 0.762 |
| KIAA1324L | -0.89 | 0.115548 | 0.762 |
| LHFP      | -0.89 | 0.115549 | 0.762 |
| LY96      | -0.89 | 0.185311 | 0.839 |
| MSANTD3   | -0.89 | 0.115549 | 0.762 |
| NAA11     | -0.89 | 0.135061 | 0.786 |
| OR10K2    | -0.89 | 0.115548 | 0.762 |
| OR5P3     | -0.89 | 0.135061 | 0.786 |
| PAG1      | -0.89 | 0.115549 | 0.762 |
| PPP1R12B  | -0.89 | 0.115548 | 0.762 |
| PSMA3     | -0.89 | 0.135062 | 0.786 |
| RAB12     | -0.89 | 0.115548 | 0.762 |
| RNASEL    | -0.89 | 0.115548 | 0.762 |
| SLC37A3   | -0.89 | 0.115548 | 0.762 |
| SUCNR1    | -0.89 | 0.115548 | 0.762 |
| TRADD     | -0.89 | 0.135062 | 0.786 |
| TUFM      | -0.89 | 0.135061 | 0.786 |
| WFDC10B   | -0.89 | 0.115548 | 0.762 |
| ZNF713    | -0.89 | 0.115548 | 0.762 |
| AAR2      | -0.88 | 0.11959  | 0.763 |
| ALX3      | -0.88 | 0.11959  | 0.763 |
| ANKAR     | -0.88 | 0.11959  | 0.763 |
| AP3S2     | -0.88 | 0.139369 | 0.789 |
| AVPR1A    | -0.88 | 0.11959  | 0.763 |
| BMP8B     | -0.88 | 0.11959  | 0.763 |
| C14orf183 | -0.88 | 0.11959  | 0.763 |
| CCL18     | -0.88 | 0.11959  | 0.763 |
| CD86      | -0.88 | 0.13937  | 0.789 |
| CEP295NL  | -0.88 | 0.11959  | 0.763 |
| DHX15     | -0.88 | 0.162581 | 0.822 |
| DNAJB1    | -0.88 | 0.11959  | 0.763 |
| DPM3      | -0.88 | 0.11959  | 0.763 |
| EFHC2     | -0.88 | 0.139369 | 0.789 |
| EFTUD1    | -0.88 | 0.11959  | 0.763 |
| EWSR1     | -0.88 | 0.11959  | 0.763 |
| FKBP5     | -0.88 | 0.11959  | 0.763 |
| GMIP      | -0.88 | 0.13937  | 0.789 |
| GPIHBP1   | -0.88 | 0.139369 | 0.789 |
| GPRC5A    | -0.88 | 0.139369 | 0.789 |
| GRM3      | -0.88 | 0.13937  | 0.789 |
| HRCT1     | -0.88 | 0.162581 | 0.822 |
| HSPA14    | -0.88 | 0.11959  | 0.763 |
| IDO1      | -0.88 | 0.11959  | 0.763 |
| IL9       | -0.88 | 0.13937  | 0.789 |

|          |       |          |       |
|----------|-------|----------|-------|
| INPP5E   | -0.88 | 0.11959  | 0.763 |
| IPO9     | -0.88 | 0.11959  | 0.763 |
| KITLG    | -0.88 | 0.11959  | 0.763 |
| KMT2E    | -0.88 | 0.11959  | 0.763 |
| LINGO3   | -0.88 | 0.13937  | 0.789 |
| MC5R     | -0.88 | 0.11959  | 0.763 |
| MFSD4    | -0.88 | 0.11959  | 0.763 |
| NUP35    | -0.88 | 0.11959  | 0.763 |
| P2RY4    | -0.88 | 0.11959  | 0.763 |
| PAPD7    | -0.88 | 0.11959  | 0.763 |
| PCDHA5   | -0.88 | 0.11959  | 0.763 |
| PRR14    | -0.88 | 0.11959  | 0.763 |
| PTGER2   | -0.88 | 0.11959  | 0.763 |
| RAB9B    | -0.88 | 0.11959  | 0.763 |
| RP1      | -0.88 | 0.11959  | 0.763 |
| SLC45A3  | -0.88 | 0.11959  | 0.763 |
| SLC7A7   | -0.88 | 0.11959  | 0.763 |
| SOSTDC1  | -0.88 | 0.139369 | 0.789 |
| SPATA5   | -0.88 | 0.11959  | 0.763 |
| SPRY1    | -0.88 | 0.11959  | 0.763 |
| SRSF12   | -0.88 | 0.11959  | 0.763 |
| TCOF1    | -0.88 | 0.11959  | 0.763 |
| TELO2    | -0.88 | 0.13937  | 0.789 |
| TMEM191C | -0.88 | 0.11959  | 0.763 |
| TUBB4A   | -0.88 | 0.11959  | 0.763 |
| USP2     | -0.88 | 0.13937  | 0.789 |
| VEZF1    | -0.88 | 0.11959  | 0.763 |
| ZFPL1    | -0.88 | 0.11959  | 0.763 |
| ADCY1    | -0.87 | 0.123759 | 0.772 |
| BLVRA    | -0.87 | 0.123759 | 0.772 |
| C1orf61  | -0.87 | 0.143666 | 0.795 |
| CA1      | -0.87 | 0.123759 | 0.772 |
| CDC42EP4 | -0.87 | 0.167214 | 0.827 |
| CDH13    | -0.87 | 0.143665 | 0.795 |
| CDK1     | -0.87 | 0.167214 | 0.827 |
| CPEB2    | -0.87 | 0.228857 | 0.871 |
| EGR2     | -0.87 | 0.195098 | 0.848 |
| FAM153A  | -0.87 | 0.123759 | 0.772 |
| FBXW10   | -0.87 | 0.123759 | 0.772 |
| GEMIN2   | -0.87 | 0.167214 | 0.827 |
| GRAMD1B  | -0.87 | 0.123759 | 0.772 |
| HNRNPU   | -0.87 | 0.123759 | 0.772 |
| KALRN    | -0.87 | 0.143665 | 0.795 |
| KLHDC1   | -0.87 | 0.123759 | 0.772 |
| LRG1     | -0.87 | 0.123759 | 0.772 |
| MAP10    | -0.87 | 0.123759 | 0.772 |
| MYL2     | -0.87 | 0.143665 | 0.795 |

|          |       |          |       |
|----------|-------|----------|-------|
| MZT1     | -0.87 | 0.143665 | 0.795 |
| PAIP2    | -0.87 | 0.123759 | 0.772 |
| PGM2L1   | -0.87 | 0.123759 | 0.772 |
| PLA2G16  | -0.87 | 0.123759 | 0.772 |
| PSMB3    | -0.87 | 0.195098 | 0.848 |
| PTPN2    | -0.87 | 0.123759 | 0.772 |
| RABEPK   | -0.87 | 0.123759 | 0.772 |
| RASA2    | -0.87 | 0.123759 | 0.772 |
| SGCD     | -0.87 | 0.123759 | 0.772 |
| SNRPE    | -0.87 | 0.228857 | 0.871 |
| TMEM182  | -0.87 | 0.123759 | 0.772 |
| TMEM187  | -0.87 | 0.143665 | 0.795 |
| UTY      | -0.87 | 0.123759 | 0.772 |
| YES1     | -0.87 | 0.123759 | 0.772 |
| ZC3H13   | -0.87 | 0.143665 | 0.795 |
| ZNF428   | -0.87 | 0.123759 | 0.772 |
| AARS     | -0.86 | 0.127963 | 0.779 |
| ATP6AP1L | -0.86 | 0.148161 | 0.804 |
| ATP6V1F  | -0.86 | 0.148161 | 0.804 |
| C19orf35 | -0.86 | 0.127963 | 0.779 |
| C1QB     | -0.86 | 0.127963 | 0.779 |
| C21orf33 | -0.86 | 0.127963 | 0.779 |
| CCDC7    | -0.86 | 0.127963 | 0.779 |
| CIDEC    | -0.86 | 0.127963 | 0.779 |
| CLTB     | -0.86 | 0.127963 | 0.779 |
| CNIH1    | -0.86 | 0.127963 | 0.779 |
| DHRS4L2  | -0.86 | 0.127963 | 0.779 |
| DTYMK    | -0.86 | 0.127963 | 0.779 |
| EFNA4    | -0.86 | 0.127963 | 0.779 |
| EIF2D    | -0.86 | 0.127963 | 0.779 |
| GLOD5    | -0.86 | 0.127963 | 0.779 |
| HINT2    | -0.86 | 0.127963 | 0.779 |
| ICK      | -0.86 | 0.127963 | 0.779 |
| KIF3B    | -0.86 | 0.148162 | 0.804 |
| LGALS14  | -0.86 | 0.127963 | 0.779 |
| MAGEA9   | -0.86 | 0.127963 | 0.779 |
| MMS22L   | -0.86 | 0.127963 | 0.779 |
| NEUROG3  | -0.86 | 0.127963 | 0.779 |
| NUPL1    | -0.86 | 0.127963 | 0.779 |
| P2RY2    | -0.86 | 0.127963 | 0.779 |
| PFKFB3   | -0.86 | 0.127963 | 0.779 |
| PMPCA    | -0.86 | 0.200086 | 0.848 |
| PRB4     | -0.86 | 0.127963 | 0.779 |
| PXN      | -0.86 | 0.127963 | 0.779 |
| RUFY3    | -0.86 | 0.127963 | 0.779 |
| SEC14L6  | -0.86 | 0.127963 | 0.779 |
| SIGLEC9  | -0.86 | 0.148162 | 0.804 |

|           |       |          |       |
|-----------|-------|----------|-------|
| SPATA7    | -0.86 | 0.127963 | 0.779 |
| TAB1      | -0.86 | 0.171982 | 0.829 |
| TCHH      | -0.86 | 0.127963 | 0.779 |
| TRHR      | -0.86 | 0.127963 | 0.779 |
| UNC5C     | -0.86 | 0.127963 | 0.779 |
| WARS      | -0.86 | 0.171982 | 0.829 |
| ANAPC13   | -0.85 | 0.13232  | 0.782 |
| ARID4A    | -0.85 | 0.132319 | 0.782 |
| ASL       | -0.85 | 0.132319 | 0.782 |
| ATP6V1C1  | -0.85 | 0.132319 | 0.782 |
| CDH11     | -0.85 | 0.132319 | 0.782 |
| CELF5     | -0.85 | 0.132319 | 0.782 |
| CGA       | -0.85 | 0.132319 | 0.782 |
| CORO2A    | -0.85 | 0.132319 | 0.782 |
| DLX2      | -0.85 | 0.13232  | 0.782 |
| DPEP3     | -0.85 | 0.132319 | 0.782 |
| EML5      | -0.85 | 0.13232  | 0.782 |
| FAM155A   | -0.85 | 0.132319 | 0.782 |
| FAM19A1   | -0.85 | 0.132319 | 0.782 |
| FLVCR1    | -0.85 | 0.13232  | 0.782 |
| FNTB      | -0.85 | 0.15281  | 0.807 |
| FSTL5     | -0.85 | 0.13232  | 0.782 |
| GNL3      | -0.85 | 0.176824 | 0.835 |
| GRAPL     | -0.85 | 0.13232  | 0.782 |
| GTF3C2    | -0.85 | 0.176824 | 0.835 |
| HLA-DQA2  | -0.85 | 0.132319 | 0.782 |
| INPP4B    | -0.85 | 0.132319 | 0.782 |
| KRT77     | -0.85 | 0.132319 | 0.782 |
| MAGEA9B   | -0.85 | 0.132319 | 0.782 |
| MBD5      | -0.85 | 0.132319 | 0.782 |
| NAE1      | -0.85 | 0.132319 | 0.782 |
| OR2T12    | -0.85 | 0.132319 | 0.782 |
| PLEKHA3   | -0.85 | 0.132319 | 0.782 |
| POU2AF1   | -0.85 | 0.15281  | 0.807 |
| PRKCB     | -0.85 | 0.13232  | 0.782 |
| PRRC2A    | -0.85 | 0.132319 | 0.782 |
| RBM3      | -0.85 | 0.132319 | 0.782 |
| SDF2L1    | -0.85 | 0.13232  | 0.782 |
| SMCO3     | -0.85 | 0.15281  | 0.807 |
| SPATA5L1  | -0.85 | 0.132319 | 0.782 |
| SPIC      | -0.85 | 0.13232  | 0.782 |
| TMEM191B  | -0.85 | 0.15281  | 0.807 |
| TMPRSS11E | -0.85 | 0.13232  | 0.782 |
| TSC22D2   | -0.85 | 0.132319 | 0.782 |
| UBXN8     | -0.85 | 0.239381 | 0.879 |
| USP35     | -0.85 | 0.176824 | 0.835 |
| VSIG2     | -0.85 | 0.13232  | 0.782 |

|          |       |          |       |
|----------|-------|----------|-------|
| ZNF233   | -0.85 | 0.13232  | 0.782 |
| ZNF865   | -0.85 | 0.15281  | 0.807 |
| ZRSR2    | -0.85 | 0.13232  | 0.782 |
| ANP32E   | -0.84 | 0.136798 | 0.786 |
| ARMCX3   | -0.84 | 0.136798 | 0.786 |
| C9orf3   | -0.84 | 0.136798 | 0.786 |
| CBLB     | -0.84 | 0.18183  | 0.838 |
| CDK12    | -0.84 | 0.15753  | 0.811 |
| CHM      | -0.84 | 0.136799 | 0.786 |
| CYB5R3   | -0.84 | 0.136798 | 0.786 |
| DEPDC4   | -0.84 | 0.15753  | 0.811 |
| DNTT     | -0.84 | 0.15753  | 0.811 |
| ERLEC1   | -0.84 | 0.15753  | 0.811 |
| FAM222A  | -0.84 | 0.136799 | 0.786 |
| FIP1L1   | -0.84 | 0.157529 | 0.811 |
| FUT5     | -0.84 | 0.136798 | 0.786 |
| HIST3H2A | -0.84 | 0.15753  | 0.811 |
| HSPH1    | -0.84 | 0.136798 | 0.786 |
| INS-IGF2 | -0.84 | 0.136798 | 0.786 |
| KHDRBS2  | -0.84 | 0.136798 | 0.786 |
| KLHL14   | -0.84 | 0.136798 | 0.786 |
| LARP1B   | -0.84 | 0.136798 | 0.786 |
| LPP      | -0.84 | 0.136798 | 0.786 |
| LRRC20   | -0.84 | 0.136798 | 0.786 |
| LRTM1    | -0.84 | 0.136798 | 0.786 |
| LSMD1    | -0.84 | 0.136798 | 0.786 |
| MEX3B    | -0.84 | 0.136798 | 0.786 |
| MKI67IP  | -0.84 | 0.18183  | 0.838 |
| MKL2     | -0.84 | 0.136798 | 0.786 |
| MTMR9    | -0.84 | 0.136799 | 0.786 |
| PABPC5   | -0.84 | 0.136798 | 0.786 |
| POMGNT1  | -0.84 | 0.136798 | 0.786 |
| ROBO4    | -0.84 | 0.15753  | 0.811 |
| RPLP2    | -0.84 | 0.18183  | 0.838 |
| SLC35F3  | -0.84 | 0.136799 | 0.786 |
| SPAG4    | -0.84 | 0.136799 | 0.786 |
| TM9SF1   | -0.84 | 0.15753  | 0.811 |
| TMEM108  | -0.84 | 0.136798 | 0.786 |
| TMEM35   | -0.84 | 0.136798 | 0.786 |
| TP53I13  | -0.84 | 0.15753  | 0.811 |
| UBQLN4   | -0.84 | 0.136799 | 0.786 |
| UBR3     | -0.84 | 0.136798 | 0.786 |
| UNKL     | -0.84 | 0.136798 | 0.786 |
| VGLL2    | -0.84 | 0.136798 | 0.786 |
| VPS53    | -0.84 | 0.210406 | 0.859 |
| VTN      | -0.84 | 0.136798 | 0.786 |
| WDSUB1   | -0.84 | 0.136798 | 0.786 |

|          |       |          |       |
|----------|-------|----------|-------|
| XPNPEP2  | -0.84 | 0.136798 | 0.786 |
| ZNF740   | -0.84 | 0.136798 | 0.786 |
| ABHD12   | -0.83 | 0.141337 | 0.789 |
| ADPRHL1  | -0.83 | 0.141337 | 0.789 |
| ANAPC2   | -0.83 | 0.162448 | 0.822 |
| ARHGAP8  | -0.83 | 0.141337 | 0.789 |
| C1orf186 | -0.83 | 0.141337 | 0.789 |
| C1orf194 | -0.83 | 0.141337 | 0.789 |
| CA13     | -0.83 | 0.141337 | 0.789 |
| CCDC113  | -0.83 | 0.141336 | 0.789 |
| CSNK1A1L | -0.83 | 0.141337 | 0.789 |
| DCTN6    | -0.83 | 0.162448 | 0.822 |
| DOT1L    | -0.83 | 0.141336 | 0.789 |
| ENG      | -0.83 | 0.141337 | 0.789 |
| FAM120B  | -0.83 | 0.141337 | 0.789 |
| FNDC5    | -0.83 | 0.141336 | 0.789 |
| FUT4     | -0.83 | 0.141337 | 0.789 |
| GJD2     | -0.83 | 0.141337 | 0.789 |
| GLMN     | -0.83 | 0.141337 | 0.789 |
| GPR17    | -0.83 | 0.141337 | 0.789 |
| KCNE1L   | -0.83 | 0.141337 | 0.789 |
| KIAA1804 | -0.83 | 0.162448 | 0.822 |
| KIF17    | -0.83 | 0.141337 | 0.789 |
| KLRC1    | -0.83 | 0.141336 | 0.789 |
| LCMT2    | -0.83 | 0.141337 | 0.789 |
| MED6     | -0.83 | 0.141337 | 0.789 |
| N6AMT1   | -0.83 | 0.18688  | 0.839 |
| NFATC1   | -0.83 | 0.141337 | 0.789 |
| NKG7     | -0.83 | 0.141337 | 0.789 |
| PCDH1    | -0.83 | 0.141337 | 0.789 |
| PCDHB15  | -0.83 | 0.141336 | 0.789 |
| PSMB8    | -0.83 | 0.141337 | 0.789 |
| RGPD8    | -0.83 | 0.141337 | 0.789 |
| SERTAD1  | -0.83 | 0.141337 | 0.789 |
| SLC22A2  | -0.83 | 0.141337 | 0.789 |
| TAF1A    | -0.83 | 0.18688  | 0.839 |
| TBL1Y    | -0.83 | 0.141336 | 0.789 |
| TMPRSS3  | -0.83 | 0.141337 | 0.789 |
| UPF3B    | -0.83 | 0.141337 | 0.789 |
| VPS11    | -0.83 | 0.141337 | 0.789 |
| ZNF569   | -0.83 | 0.141336 | 0.789 |
| ATP1B1   | -0.82 | 0.146033 | 0.795 |
| BHLHE22  | -0.82 | 0.146033 | 0.795 |
| BRPF3    | -0.82 | 0.221168 | 0.868 |
| C12orf54 | -0.82 | 0.146033 | 0.795 |
| C17orf96 | -0.82 | 0.146033 | 0.795 |
| CMIP     | -0.82 | 0.146033 | 0.795 |

|           |       |          |       |
|-----------|-------|----------|-------|
| CTBP1     | -0.82 | 0.146033 | 0.795 |
| DNAAF1    | -0.82 | 0.146033 | 0.795 |
| DPY19L2   | -0.82 | 0.167401 | 0.827 |
| DUOXA1    | -0.82 | 0.146033 | 0.795 |
| ECM1      | -0.82 | 0.167401 | 0.827 |
| ELK4      | -0.82 | 0.146033 | 0.795 |
| ENTHD2    | -0.82 | 0.146033 | 0.795 |
| FAM57A    | -0.82 | 0.146033 | 0.795 |
| GLB1      | -0.82 | 0.146033 | 0.795 |
| GPR123    | -0.82 | 0.146033 | 0.795 |
| HACE1     | -0.82 | 0.146033 | 0.795 |
| HOXB7     | -0.82 | 0.146034 | 0.795 |
| IFRD2     | -0.82 | 0.146034 | 0.795 |
| IWS1      | -0.82 | 0.146034 | 0.795 |
| KHDRBS3   | -0.82 | 0.146033 | 0.795 |
| KIAA1211  | -0.82 | 0.221168 | 0.868 |
| LRP1      | -0.82 | 0.146033 | 0.795 |
| MESP2     | -0.82 | 0.146033 | 0.795 |
| MYOZ3     | -0.82 | 0.146033 | 0.795 |
| OR10J5    | -0.82 | 0.146033 | 0.795 |
| OR4F15    | -0.82 | 0.146033 | 0.795 |
| PAICS     | -0.82 | 0.192094 | 0.846 |
| RFWD2     | -0.82 | 0.146033 | 0.795 |
| SARS2     | -0.82 | 0.167401 | 0.827 |
| SLC22A3   | -0.82 | 0.146033 | 0.795 |
| SLC25A27  | -0.82 | 0.146034 | 0.795 |
| SLC4A2    | -0.82 | 0.146033 | 0.795 |
| TBC1D8    | -0.82 | 0.146033 | 0.795 |
| TMC1      | -0.82 | 0.167401 | 0.827 |
| TMEM167B  | -0.82 | 0.146033 | 0.795 |
| TSPO      | -0.82 | 0.167401 | 0.827 |
| TTC4      | -0.82 | 0.146033 | 0.795 |
| TUBGCP2   | -0.82 | 0.146033 | 0.795 |
| USF2      | -0.82 | 0.146034 | 0.795 |
| WNT6      | -0.82 | 0.146033 | 0.795 |
| ZBTB1     | -0.82 | 0.146033 | 0.795 |
| ZNF593    | -0.82 | 0.146033 | 0.795 |
| AADACL2   | -0.81 | 0.1509   | 0.804 |
| ACADVL    | -0.81 | 0.150901 | 0.804 |
| ALPK3     | -0.81 | 0.1509   | 0.804 |
| ANAPC4    | -0.81 | 0.150901 | 0.804 |
| ARHGAP22  | -0.81 | 0.1509   | 0.804 |
| BDP1      | -0.81 | 0.150901 | 0.804 |
| C10orf120 | -0.81 | 0.150901 | 0.804 |
| C16orf45  | -0.81 | 0.1509   | 0.804 |
| C17orf49  | -0.81 | 0.172509 | 0.829 |
| CAMTA1    | -0.81 | 0.150901 | 0.804 |

|           |       |          |       |
|-----------|-------|----------|-------|
| CCDC13    | -0.81 | 0.150901 | 0.804 |
| CEPT1     | -0.81 | 0.150901 | 0.804 |
| CFDP1     | -0.81 | 0.172509 | 0.829 |
| CNGA4     | -0.81 | 0.150901 | 0.804 |
| CXorf23   | -0.81 | 0.150901 | 0.804 |
| DEPDC1B   | -0.81 | 0.172509 | 0.829 |
| ESRP1     | -0.81 | 0.150901 | 0.804 |
| FAM175A   | -0.81 | 0.150901 | 0.804 |
| FOXD4     | -0.81 | 0.1509   | 0.804 |
| GPR20     | -0.81 | 0.150901 | 0.804 |
| GRIK2     | -0.81 | 0.150901 | 0.804 |
| KCNA1     | -0.81 | 0.1509   | 0.804 |
| KRT18     | -0.81 | 0.1509   | 0.804 |
| KRTAP19-4 | -0.81 | 0.150901 | 0.804 |
| LOX       | -0.81 | 0.1509   | 0.804 |
| MAGEC2    | -0.81 | 0.150901 | 0.804 |
| MAGED1    | -0.81 | 0.1509   | 0.804 |
| MALRD1    | -0.81 | 0.1509   | 0.804 |
| NCAM2     | -0.81 | 0.150901 | 0.804 |
| PBDC1     | -0.81 | 0.1509   | 0.804 |
| PHC2      | -0.81 | 0.150901 | 0.804 |
| PROL1     | -0.81 | 0.150901 | 0.804 |
| SBNO1     | -0.81 | 0.172509 | 0.829 |
| SP140     | -0.81 | 0.172509 | 0.829 |
| TNNT1     | -0.81 | 0.197337 | 0.848 |
| USP17L17  | -0.81 | 0.303314 | 0.9   |
| VN1R2     | -0.81 | 0.1509   | 0.804 |
| WRN       | -0.81 | 0.1509   | 0.804 |
| ZNF431    | -0.81 | 0.172509 | 0.829 |
| ABCF1     | -0.8  | 0.17771  | 0.835 |
| ADRA2B    | -0.8  | 0.155842 | 0.807 |
| ALCAM     | -0.8  | 0.155842 | 0.807 |
| ARNTL     | -0.8  | 0.155843 | 0.807 |
| ATF5      | -0.8  | 0.155842 | 0.807 |
| AVPI1     | -0.8  | 0.155843 | 0.807 |
| BHLHB9    | -0.8  | 0.177711 | 0.835 |
| C10orf35  | -0.8  | 0.155843 | 0.807 |
| CAMKV     | -0.8  | 0.17771  | 0.835 |
| CBLL1     | -0.8  | 0.17771  | 0.835 |
| CCNE2     | -0.8  | 0.155843 | 0.807 |
| CD3D      | -0.8  | 0.155843 | 0.807 |
| CLOCK     | -0.8  | 0.155843 | 0.807 |
| DHX35     | -0.8  | 0.155842 | 0.807 |
| DMTN      | -0.8  | 0.17771  | 0.835 |
| EGF1      | -0.8  | 0.155843 | 0.807 |
| GALNS     | -0.8  | 0.155842 | 0.807 |
| GSTA4     | -0.8  | 0.155843 | 0.807 |

|          |       |          |       |
|----------|-------|----------|-------|
| IFNA5    | -0.8  | 0.155843 | 0.807 |
| ISX      | -0.8  | 0.155843 | 0.807 |
| ITGB7    | -0.8  | 0.17771  | 0.835 |
| KLHL9    | -0.8  | 0.155842 | 0.807 |
| KMT2D    | -0.8  | 0.155843 | 0.807 |
| LIPM     | -0.8  | 0.155843 | 0.807 |
| LRRC55   | -0.8  | 0.155842 | 0.807 |
| MUC6     | -0.8  | 0.17771  | 0.835 |
| NCKAP5L  | -0.8  | 0.155842 | 0.807 |
| NES      | -0.8  | 0.155842 | 0.807 |
| NR4A2    | -0.8  | 0.20275  | 0.858 |
| NUAK1    | -0.8  | 0.155842 | 0.807 |
| OR5M3    | -0.8  | 0.155843 | 0.807 |
| OR7D4    | -0.8  | 0.155842 | 0.807 |
| OTUD6A   | -0.8  | 0.155842 | 0.807 |
| PRPF6    | -0.8  | 0.232317 | 0.871 |
| QSOX2    | -0.8  | 0.155843 | 0.807 |
| S100A6   | -0.8  | 0.17771  | 0.835 |
| SBF1     | -0.8  | 0.155842 | 0.807 |
| SFXN5    | -0.8  | 0.155843 | 0.807 |
| SLC25A11 | -0.8  | 0.155842 | 0.807 |
| SLC26A8  | -0.8  | 0.155843 | 0.807 |
| SMIM12   | -0.8  | 0.155843 | 0.807 |
| SNTA1    | -0.8  | 0.155842 | 0.807 |
| SPIDR    | -0.8  | 0.155843 | 0.807 |
| STAT5A   | -0.8  | 0.155842 | 0.807 |
| USHBP1   | -0.8  | 0.155842 | 0.807 |
| WDR48    | -0.8  | 0.155843 | 0.807 |
| YAE1D1   | -0.8  | 0.177711 | 0.835 |
| ZBTB33   | -0.8  | 0.155843 | 0.807 |
| ZFAND3   | -0.8  | 0.155842 | 0.807 |
| ZFP2     | -0.8  | 0.155843 | 0.807 |
| ZNF534   | -0.8  | 0.155842 | 0.807 |
| ZSCAN26  | -0.8  | 0.155842 | 0.807 |
| AMMECR1  | -0.79 | 0.160916 | 0.817 |
| ATG2B    | -0.79 | 0.160916 | 0.817 |
| BCR      | -0.79 | 0.160915 | 0.817 |
| CCNA1    | -0.79 | 0.160916 | 0.817 |
| CHD9     | -0.79 | 0.160915 | 0.817 |
| CRLF2    | -0.79 | 0.160916 | 0.817 |
| CTSG     | -0.79 | 0.18301  | 0.838 |
| EXTL1    | -0.79 | 0.18301  | 0.838 |
| FAM107A  | -0.79 | 0.183009 | 0.838 |
| FAM166B  | -0.79 | 0.160916 | 0.817 |
| HCAR2    | -0.79 | 0.160916 | 0.817 |
| HSD3B2   | -0.79 | 0.160916 | 0.817 |
| HSPA1L   | -0.79 | 0.160916 | 0.817 |

|           |       |          |       |
|-----------|-------|----------|-------|
| IER3      | -0.79 | 0.160916 | 0.817 |
| KRTAP1-4  | -0.79 | 0.160915 | 0.817 |
| LYZL4     | -0.79 | 0.18301  | 0.838 |
| MCCD1     | -0.79 | 0.18301  | 0.838 |
| OPA3      | -0.79 | 0.160916 | 0.817 |
| PFN2      | -0.79 | 0.160916 | 0.817 |
| PIM2      | -0.79 | 0.160916 | 0.817 |
| REEP1     | -0.79 | 0.160916 | 0.817 |
| RNF2      | -0.79 | 0.160916 | 0.817 |
| SETD6     | -0.79 | 0.160916 | 0.817 |
| SKP2      | -0.79 | 0.160916 | 0.817 |
| SLC28A2   | -0.79 | 0.160916 | 0.817 |
| SLC6A8    | -0.79 | 0.160915 | 0.817 |
| SPTBN2    | -0.79 | 0.18301  | 0.838 |
| TAS2R20   | -0.79 | 0.160915 | 0.817 |
| THOC7     | -0.79 | 0.160916 | 0.817 |
| TMEM41B   | -0.79 | 0.160916 | 0.817 |
| ZNF169    | -0.79 | 0.160916 | 0.817 |
| ZNF317    | -0.79 | 0.18301  | 0.838 |
| ZNF329    | -0.79 | 0.160915 | 0.817 |
| ALG14     | -0.78 | 0.188432 | 0.839 |
| C10orf137 | -0.78 | 0.166076 | 0.824 |
| CAPN10    | -0.78 | 0.166076 | 0.824 |
| CLEC11A   | -0.78 | 0.213911 | 0.864 |
| COX6C     | -0.78 | 0.243816 | 0.879 |
| CPLX1     | -0.78 | 0.166076 | 0.824 |
| DEXI      | -0.78 | 0.166075 | 0.824 |
| DKK1      | -0.78 | 0.166076 | 0.824 |
| F2RL3     | -0.78 | 0.166075 | 0.824 |
| FAM118B   | -0.78 | 0.188432 | 0.839 |
| FAM194A   | -0.78 | 0.166076 | 0.824 |
| FBXO44    | -0.78 | 0.166075 | 0.824 |
| GPR55     | -0.78 | 0.166075 | 0.824 |
| GSDMC     | -0.78 | 0.188432 | 0.839 |
| HCN3      | -0.78 | 0.166075 | 0.824 |
| HILPDA    | -0.78 | 0.166076 | 0.824 |
| HLA-C     | -0.78 | 0.166076 | 0.824 |
| IFT43     | -0.78 | 0.166076 | 0.824 |
| KDM4B     | -0.78 | 0.166075 | 0.824 |
| KRTAP10-4 | -0.78 | 0.213911 | 0.864 |
| LCT       | -0.78 | 0.166075 | 0.824 |
| MED9      | -0.78 | 0.166076 | 0.824 |
| MRTO4     | -0.78 | 0.166075 | 0.824 |
| MX2       | -0.78 | 0.166075 | 0.824 |
| MYO1A     | -0.78 | 0.166076 | 0.824 |
| NANOS2    | -0.78 | 0.166076 | 0.824 |
| PDLIM4    | -0.78 | 0.166076 | 0.824 |

|           |       |          |       |
|-----------|-------|----------|-------|
| PIGQ      | -0.78 | 0.166076 | 0.824 |
| PLIN1     | -0.78 | 0.188433 | 0.839 |
| RALYL     | -0.78 | 0.166076 | 0.824 |
| RBM44     | -0.78 | 0.166075 | 0.824 |
| RFX3      | -0.78 | 0.188432 | 0.839 |
| S1PR2     | -0.78 | 0.166076 | 0.824 |
| SGSM1     | -0.78 | 0.188432 | 0.839 |
| SGTB      | -0.78 | 0.166075 | 0.824 |
| SMIM20    | -0.78 | 0.166076 | 0.824 |
| SUCO      | -0.78 | 0.166076 | 0.824 |
| SYNJ2     | -0.78 | 0.188432 | 0.839 |
| TMCO2     | -0.78 | 0.166075 | 0.824 |
| TNIP3     | -0.78 | 0.166076 | 0.824 |
| UBE4A     | -0.78 | 0.166076 | 0.824 |
| WDR70     | -0.78 | 0.166075 | 0.824 |
| ZFAND5    | -0.78 | 0.166076 | 0.824 |
| ZKSCAN3   | -0.78 | 0.166076 | 0.824 |
| ACYP2     | -0.77 | 0.171381 | 0.827 |
| ANKRD46   | -0.77 | 0.171381 | 0.827 |
| AP2A1     | -0.77 | 0.171381 | 0.827 |
| ARHGEF15  | -0.77 | 0.171381 | 0.827 |
| ASCC1     | -0.77 | 0.17138  | 0.827 |
| ATMIN     | -0.77 | 0.171381 | 0.827 |
| C11orf97  | -0.77 | 0.171381 | 0.827 |
| C17orf107 | -0.77 | 0.17138  | 0.827 |
| C4orf17   | -0.77 | 0.171381 | 0.827 |
| CCDC78    | -0.77 | 0.171381 | 0.827 |
| CD274     | -0.77 | 0.17138  | 0.827 |
| CD38      | -0.77 | 0.171381 | 0.827 |
| CSNK2A2   | -0.77 | 0.17138  | 0.827 |
| CWC15     | -0.77 | 0.17138  | 0.827 |
| DNAJA4    | -0.77 | 0.193975 | 0.846 |
| EGF       | -0.77 | 0.171381 | 0.827 |
| FAM179A   | -0.77 | 0.17138  | 0.827 |
| FAM186B   | -0.77 | 0.171381 | 0.827 |
| FAM43B    | -0.77 | 0.193975 | 0.846 |
| FBRSL1    | -0.77 | 0.171381 | 0.827 |
| GKAP1     | -0.77 | 0.171381 | 0.827 |
| GLUD2     | -0.77 | 0.171381 | 0.827 |
| HPS5      | -0.77 | 0.193975 | 0.846 |
| HS3ST2    | -0.77 | 0.193974 | 0.846 |
| IL20RA    | -0.77 | 0.219646 | 0.868 |
| KRTAP4-1  | -0.77 | 0.17138  | 0.827 |
| LCN9      | -0.77 | 0.171381 | 0.827 |
| LTF       | -0.77 | 0.171381 | 0.827 |
| MARCH11   | -0.77 | 0.193974 | 0.846 |
| MCCC2     | -0.77 | 0.171381 | 0.827 |

|          |       |          |       |
|----------|-------|----------|-------|
| OR2Y1    | -0.77 | 0.171381 | 0.827 |
| OTUD7A   | -0.77 | 0.193974 | 0.846 |
| OXSR1    | -0.77 | 0.171381 | 0.827 |
| PLB1     | -0.77 | 0.17138  | 0.827 |
| PRSS45   | -0.77 | 0.17138  | 0.827 |
| S100A11  | -0.77 | 0.171381 | 0.827 |
| SH3BP2   | -0.77 | 0.171381 | 0.827 |
| SMC5     | -0.77 | 0.193974 | 0.846 |
| SMYD4    | -0.77 | 0.171381 | 0.827 |
| SNAPC5   | -0.77 | 0.219646 | 0.868 |
| SON      | -0.77 | 0.17138  | 0.827 |
| SPAG16   | -0.77 | 0.17138  | 0.827 |
| TACR1    | -0.77 | 0.219646 | 0.868 |
| TBL1X    | -0.77 | 0.171381 | 0.827 |
| TBP      | -0.77 | 0.171381 | 0.827 |
| TCF21    | -0.77 | 0.17138  | 0.827 |
| TSPAN12  | -0.77 | 0.171381 | 0.827 |
| TYW5     | -0.77 | 0.17138  | 0.827 |
| XBP1     | -0.77 | 0.17138  | 0.827 |
| ZBTB6    | -0.77 | 0.17138  | 0.827 |
| ZNF30    | -0.77 | 0.171381 | 0.827 |
| ZNF770   | -0.77 | 0.171381 | 0.827 |
| ACSS1    | -0.76 | 0.176848 | 0.835 |
| ATAT1    | -0.76 | 0.176848 | 0.835 |
| ATG4A    | -0.76 | 0.176848 | 0.835 |
| BDKRB1   | -0.76 | 0.176848 | 0.835 |
| BHLHE41  | -0.76 | 0.176848 | 0.835 |
| C5orf60  | -0.76 | 0.199564 | 0.848 |
| CARKD    | -0.76 | 0.176848 | 0.835 |
| CASP14   | -0.76 | 0.176847 | 0.835 |
| CDK5RAP2 | -0.76 | 0.176848 | 0.835 |
| COL4A6   | -0.76 | 0.176848 | 0.835 |
| CRLF1    | -0.76 | 0.199564 | 0.848 |
| DDX23    | -0.76 | 0.333102 | 0.908 |
| DDX3Y    | -0.76 | 0.176848 | 0.835 |
| DUS1L    | -0.76 | 0.199564 | 0.848 |
| ECT2     | -0.76 | 0.199564 | 0.848 |
| FASLG    | -0.76 | 0.199563 | 0.848 |
| FLNC     | -0.76 | 0.176847 | 0.835 |
| FZD5     | -0.76 | 0.176848 | 0.835 |
| GJD4     | -0.76 | 0.199564 | 0.848 |
| GPR180   | -0.76 | 0.199564 | 0.848 |
| H2AFB2   | -0.76 | 0.176848 | 0.835 |
| HIST1H4L | -0.76 | 0.199563 | 0.848 |
| IGSF23   | -0.76 | 0.199563 | 0.848 |
| IL34     | -0.76 | 0.176848 | 0.835 |
| KLF11    | -0.76 | 0.199564 | 0.848 |

|           |       |          |       |
|-----------|-------|----------|-------|
| KLRG2     | -0.76 | 0.176848 | 0.835 |
| MGAT2     | -0.76 | 0.176848 | 0.835 |
| ONECUT3   | -0.76 | 0.176848 | 0.835 |
| OR4C6     | -0.76 | 0.176848 | 0.835 |
| OR8A1     | -0.76 | 0.176847 | 0.835 |
| OR8J1     | -0.76 | 0.176848 | 0.835 |
| PHYHIPL   | -0.76 | 0.176847 | 0.835 |
| PLEKHG6   | -0.76 | 0.176848 | 0.835 |
| PRDX1     | -0.76 | 0.176848 | 0.835 |
| RAD51C    | -0.76 | 0.225498 | 0.868 |
| RHOB      | -0.76 | 0.176848 | 0.835 |
| SEMA3F    | -0.76 | 0.176848 | 0.835 |
| SLC9A7    | -0.76 | 0.176847 | 0.835 |
| SRC       | -0.76 | 0.176848 | 0.835 |
| TM2D3     | -0.76 | 0.176847 | 0.835 |
| TMPRSS11F | -0.76 | 0.176848 | 0.835 |
| TNPO3     | -0.76 | 0.225498 | 0.868 |
| TSLP      | -0.76 | 0.176848 | 0.835 |
| TSPYL4    | -0.76 | 0.199564 | 0.848 |
| USP28     | -0.76 | 0.176848 | 0.835 |
| VGf       | -0.76 | 0.199564 | 0.848 |
| VGLL3     | -0.76 | 0.199564 | 0.848 |
| VPS13D    | -0.76 | 0.199563 | 0.848 |
| ZNF280A   | -0.76 | 0.176847 | 0.835 |
| ZNF658    | -0.76 | 0.176847 | 0.835 |
| ADCY7     | -0.75 | 0.182452 | 0.838 |
| ANKRD31   | -0.75 | 0.182452 | 0.838 |
| ARL10     | -0.75 | 0.182451 | 0.838 |
| C19orf52  | -0.75 | 0.182452 | 0.838 |
| C1orf53   | -0.75 | 0.182451 | 0.838 |
| C22orf29  | -0.75 | 0.231459 | 0.871 |
| C8orf33   | -0.75 | 0.182452 | 0.838 |
| CD28      | -0.75 | 0.182452 | 0.838 |
| CLCN3     | -0.75 | 0.182452 | 0.838 |
| COL20A1   | -0.75 | 0.182452 | 0.838 |
| COPA      | -0.75 | 0.231459 | 0.871 |
| DFNA5     | -0.75 | 0.182451 | 0.838 |
| EGFL7     | -0.75 | 0.182452 | 0.838 |
| ENPP3     | -0.75 | 0.182452 | 0.838 |
| FABP2     | -0.75 | 0.182452 | 0.838 |
| FAM204A   | -0.75 | 0.182451 | 0.838 |
| FAM211B   | -0.75 | 0.205364 | 0.858 |
| GOLGA6L9  | -0.75 | 0.182452 | 0.838 |
| GZF1      | -0.75 | 0.205364 | 0.858 |
| H2AFB3    | -0.75 | 0.182451 | 0.838 |
| KIF26A    | -0.75 | 0.182452 | 0.838 |
| LAMTOR5   | -0.75 | 0.182451 | 0.838 |

|           |       |          |       |
|-----------|-------|----------|-------|
| LANCL3    | -0.75 | 0.182452 | 0.838 |
| LOC79999  | -0.75 | 0.182452 | 0.838 |
| LRCH4     | -0.75 | 0.205364 | 0.858 |
| LRSAM1    | -0.75 | 0.182452 | 0.838 |
| LURAP1    | -0.75 | 0.182451 | 0.838 |
| MED12L    | -0.75 | 0.182451 | 0.838 |
| MFSD6L    | -0.75 | 0.182451 | 0.838 |
| MGAT1     | -0.75 | 0.182452 | 0.838 |
| MLKL      | -0.75 | 0.182452 | 0.838 |
| MOGS      | -0.75 | 0.205364 | 0.858 |
| MROH2B    | -0.75 | 0.182452 | 0.838 |
| NXT2      | -0.75 | 0.182451 | 0.838 |
| OR10Z1    | -0.75 | 0.182451 | 0.838 |
| PCDH17    | -0.75 | 0.182451 | 0.838 |
| PRODH     | -0.75 | 0.205364 | 0.858 |
| RAB6B     | -0.75 | 0.182452 | 0.838 |
| RET       | -0.75 | 0.182452 | 0.838 |
| RPA4      | -0.75 | 0.182452 | 0.838 |
| RPL18     | -0.75 | 0.297297 | 0.9   |
| RPL5      | -0.75 | 0.261886 | 0.888 |
| SALL2     | -0.75 | 0.182452 | 0.838 |
| SCG3      | -0.75 | 0.182452 | 0.838 |
| SCN11A    | -0.75 | 0.205364 | 0.858 |
| TBC1D7    | -0.75 | 0.182451 | 0.838 |
| TNFSF11   | -0.75 | 0.182451 | 0.838 |
| TNP1      | -0.75 | 0.182451 | 0.838 |
| URAD      | -0.75 | 0.205364 | 0.858 |
| VRK1      | -0.75 | 0.205364 | 0.858 |
| ZNF133    | -0.75 | 0.182452 | 0.838 |
| ZNF85     | -0.75 | 0.182452 | 0.838 |
| ABCF3     | -0.74 | 0.18817  | 0.839 |
| ARAF      | -0.74 | 0.18817  | 0.839 |
| ASB1      | -0.74 | 0.18817  | 0.839 |
| BTN1A1    | -0.74 | 0.18817  | 0.839 |
| C14orf166 | -0.74 | 0.18817  | 0.839 |
| C5orf42   | -0.74 | 0.18817  | 0.839 |
| CIAO1     | -0.74 | 0.211255 | 0.859 |
| CNTD1     | -0.74 | 0.18817  | 0.839 |
| COMTD1    | -0.74 | 0.18817  | 0.839 |
| CTDSP1    | -0.74 | 0.18817  | 0.839 |
| DCAF13    | -0.74 | 0.18817  | 0.839 |
| DEFB130   | -0.74 | 0.18817  | 0.839 |
| DST       | -0.74 | 0.18817  | 0.839 |
| FAM118A   | -0.74 | 0.18817  | 0.839 |
| FBXL6     | -0.74 | 0.18817  | 0.839 |
| FBXW9     | -0.74 | 0.211255 | 0.859 |
| FKBP7     | -0.74 | 0.18817  | 0.839 |

|            |       |          |       |
|------------|-------|----------|-------|
| GART       | -0.74 | 0.18817  | 0.839 |
| GTF2H4     | -0.74 | 0.18817  | 0.839 |
| HBB        | -0.74 | 0.18817  | 0.839 |
| HMGXB4     | -0.74 | 0.18817  | 0.839 |
| HSD17B1    | -0.74 | 0.211254 | 0.859 |
| IL12RB2    | -0.74 | 0.18817  | 0.839 |
| IQCJ-SCHIP | -0.74 | 0.18817  | 0.839 |
| LCK        | -0.74 | 0.18817  | 0.839 |
| LRFN5      | -0.74 | 0.18817  | 0.839 |
| MAGEB6     | -0.74 | 0.18817  | 0.839 |
| MLNR       | -0.74 | 0.18817  | 0.839 |
| MTERF      | -0.74 | 0.18817  | 0.839 |
| NAT10      | -0.74 | 0.211255 | 0.859 |
| OR5H6      | -0.74 | 0.18817  | 0.839 |
| PLAGL2     | -0.74 | 0.18817  | 0.839 |
| PPP1R14D   | -0.74 | 0.18817  | 0.839 |
| PRG4       | -0.74 | 0.18817  | 0.839 |
| PSME4      | -0.74 | 0.211254 | 0.859 |
| PTCHD3     | -0.74 | 0.18817  | 0.839 |
| RANBP6     | -0.74 | 0.18817  | 0.839 |
| SIX3       | -0.74 | 0.18817  | 0.839 |
| SLC30A1    | -0.74 | 0.18817  | 0.839 |
| SRPK3      | -0.74 | 0.211255 | 0.859 |
| TFF2       | -0.74 | 0.18817  | 0.839 |
| TMEM256    | -0.74 | 0.18817  | 0.839 |
| TMEM47     | -0.74 | 0.18817  | 0.839 |
| TRIM25     | -0.74 | 0.18817  | 0.839 |
| TSPYL2     | -0.74 | 0.18817  | 0.839 |
| TTC25      | -0.74 | 0.18817  | 0.839 |
| UBE2E3     | -0.74 | 0.18817  | 0.839 |
| UBE2T      | -0.74 | 0.18817  | 0.839 |
| UBQLN3     | -0.74 | 0.18817  | 0.839 |
| UCP2       | -0.74 | 0.18817  | 0.839 |
| ZNF18      | -0.74 | 0.18817  | 0.839 |
| ADAMTS1    | -0.73 | 0.19403  | 0.846 |
| ANKRD7     | -0.73 | 0.194029 | 0.846 |
| CCSER1     | -0.73 | 0.194029 | 0.846 |
| CDCA8      | -0.73 | 0.274334 | 0.888 |
| CEACAM21   | -0.73 | 0.217334 | 0.868 |
| CLASRP     | -0.73 | 0.194029 | 0.846 |
| CLDN1      | -0.73 | 0.19403  | 0.846 |
| DCAF17     | -0.73 | 0.19403  | 0.846 |
| DCDC2B     | -0.73 | 0.19403  | 0.846 |
| DRD4       | -0.73 | 0.194029 | 0.846 |
| ERRFI1     | -0.73 | 0.19403  | 0.846 |
| ETV5       | -0.73 | 0.19403  | 0.846 |
| FAM171A2   | -0.73 | 0.194029 | 0.846 |

|           |       |          |       |
|-----------|-------|----------|-------|
| FAM24A    | -0.73 | 0.194029 | 0.846 |
| FBXO8     | -0.73 | 0.194029 | 0.846 |
| FGG       | -0.73 | 0.19403  | 0.846 |
| GAGE12J   | -0.73 | 0.309924 | 0.903 |
| HOXC8     | -0.73 | 0.194029 | 0.846 |
| IRF6      | -0.73 | 0.194029 | 0.846 |
| KRTAP10-3 | -0.73 | 0.243756 | 0.879 |
| LACC1     | -0.73 | 0.19403  | 0.846 |
| LACTBL1   | -0.73 | 0.217335 | 0.868 |
| LAIR2     | -0.73 | 0.194029 | 0.846 |
| LCE1B     | -0.73 | 0.194029 | 0.846 |
| MARS      | -0.73 | 0.309923 | 0.903 |
| MCM6      | -0.73 | 0.19403  | 0.846 |
| METTL24   | -0.73 | 0.194029 | 0.846 |
| NOS1AP    | -0.73 | 0.194029 | 0.846 |
| PCDHA2    | -0.73 | 0.19403  | 0.846 |
| PLEKHJ1   | -0.73 | 0.194029 | 0.846 |
| PM20D2    | -0.73 | 0.217334 | 0.868 |
| PROZ      | -0.73 | 0.194029 | 0.846 |
| RDH5      | -0.73 | 0.194029 | 0.846 |
| REEP3     | -0.73 | 0.194029 | 0.846 |
| RNF214    | -0.73 | 0.217335 | 0.868 |
| SEMA4C    | -0.73 | 0.194029 | 0.846 |
| SGK223    | -0.73 | 0.194029 | 0.846 |
| SNRPG     | -0.73 | 0.352004 | 0.914 |
| TACC1     | -0.73 | 0.19403  | 0.846 |
| TBK1      | -0.73 | 0.19403  | 0.846 |
| TCF7L2    | -0.73 | 0.19403  | 0.846 |
| THPO      | -0.73 | 0.194029 | 0.846 |
| TMBIM1    | -0.73 | 0.194029 | 0.846 |
| TMEM42    | -0.73 | 0.19403  | 0.846 |
| XAB2      | -0.73 | 0.309924 | 0.903 |
| XKR3      | -0.73 | 0.194029 | 0.846 |
| ZNF573    | -0.73 | 0.194029 | 0.846 |
| ZNF92     | -0.73 | 0.194029 | 0.846 |
| ACTG2     | -0.72 | 0.223557 | 0.868 |
| ADD1      | -0.72 | 0.223557 | 0.868 |
| ADRA1A    | -0.72 | 0.200074 | 0.848 |
| ARHGAP20  | -0.72 | 0.200074 | 0.848 |
| ASAH2B    | -0.72 | 0.200074 | 0.848 |
| ASCL4     | -0.72 | 0.200074 | 0.848 |
| BCAR1     | -0.72 | 0.200074 | 0.848 |
| C19orf68  | -0.72 | 0.200074 | 0.848 |
| CASZ1     | -0.72 | 0.223557 | 0.868 |
| CEND1     | -0.72 | 0.223557 | 0.868 |
| COX4I1    | -0.72 | 0.250106 | 0.879 |
| CSF3      | -0.72 | 0.200074 | 0.848 |

|           |       |          |       |
|-----------|-------|----------|-------|
| CTU1      | -0.72 | 0.200074 | 0.848 |
| DBH       | -0.72 | 0.200074 | 0.848 |
| DGKH      | -0.72 | 0.200074 | 0.848 |
| DNAJB7    | -0.72 | 0.200074 | 0.848 |
| DNAJC2    | -0.72 | 0.250106 | 0.879 |
| DPT       | -0.72 | 0.200074 | 0.848 |
| DUSP12    | -0.72 | 0.200074 | 0.848 |
| ERCC3     | -0.72 | 0.223557 | 0.868 |
| FAM46A    | -0.72 | 0.223557 | 0.868 |
| FAM71D    | -0.72 | 0.200074 | 0.848 |
| FBXL17    | -0.72 | 0.250106 | 0.879 |
| FOXL2     | -0.72 | 0.200074 | 0.848 |
| G3BP2     | -0.72 | 0.200074 | 0.848 |
| GYPE      | -0.72 | 0.280799 | 0.891 |
| HOXB3     | -0.72 | 0.200074 | 0.848 |
| HUS1      | -0.72 | 0.200074 | 0.848 |
| ITGAX     | -0.72 | 0.223557 | 0.868 |
| KRTAP19-8 | -0.72 | 0.200074 | 0.848 |
| LIPH      | -0.72 | 0.200074 | 0.848 |
| LRRC4     | -0.72 | 0.200074 | 0.848 |
| LUC7L3    | -0.72 | 0.316411 | 0.904 |
| MFSD9     | -0.72 | 0.200074 | 0.848 |
| MOCS1     | -0.72 | 0.200074 | 0.848 |
| MSI1      | -0.72 | 0.200074 | 0.848 |
| MZF1      | -0.72 | 0.200074 | 0.848 |
| NAPRT1    | -0.72 | 0.200074 | 0.848 |
| OFD1      | -0.72 | 0.200074 | 0.848 |
| PIP5K1C   | -0.72 | 0.200074 | 0.848 |
| RAPSN     | -0.72 | 0.223557 | 0.868 |
| RNASE13   | -0.72 | 0.200074 | 0.848 |
| RPL15     | -0.72 | 0.200074 | 0.848 |
| SAMD13    | -0.72 | 0.200074 | 0.848 |
| SGTA      | -0.72 | 0.200074 | 0.848 |
| SPATA31A7 | -0.72 | 0.200074 | 0.848 |
| SYDE2     | -0.72 | 0.250106 | 0.879 |
| TMEM194A  | -0.72 | 0.200074 | 0.848 |
| TMEM50A   | -0.72 | 0.200074 | 0.848 |
| TMTC3     | -0.72 | 0.200074 | 0.848 |
| TNFAIP2   | -0.72 | 0.223557 | 0.868 |
| TOR1A     | -0.72 | 0.200074 | 0.848 |
| TRIM64    | -0.72 | 0.200074 | 0.848 |
| TUT1      | -0.72 | 0.223557 | 0.868 |
| ZNF622    | -0.72 | 0.223557 | 0.868 |
| ZNF660    | -0.72 | 0.200074 | 0.848 |
| ABCB8     | -0.71 | 0.229797 | 0.871 |
| ADCY5     | -0.71 | 0.206238 | 0.858 |
| BUB1B     | -0.71 | 0.206239 | 0.858 |

|           |       |          |       |
|-----------|-------|----------|-------|
| CCIN      | -0.71 | 0.229797 | 0.871 |
| CEP135    | -0.71 | 0.206238 | 0.858 |
| CHMP4B    | -0.71 | 0.229796 | 0.871 |
| COMT      | -0.71 | 0.256539 | 0.886 |
| CRIP3     | -0.71 | 0.229796 | 0.871 |
| CSTF3     | -0.71 | 0.206239 | 0.858 |
| CXXC11    | -0.71 | 0.206238 | 0.858 |
| DCPS      | -0.71 | 0.229797 | 0.871 |
| DDX20     | -0.71 | 0.229797 | 0.871 |
| FCRL3     | -0.71 | 0.206238 | 0.858 |
| FKBP4     | -0.71 | 0.206239 | 0.858 |
| FOXD2     | -0.71 | 0.206238 | 0.858 |
| GDF2      | -0.71 | 0.229797 | 0.871 |
| GDPD2     | -0.71 | 0.206238 | 0.858 |
| GPR26     | -0.71 | 0.206238 | 0.858 |
| GSTO1     | -0.71 | 0.206239 | 0.858 |
| GTDC1     | -0.71 | 0.229796 | 0.871 |
| GYG2      | -0.71 | 0.206239 | 0.858 |
| HBE1      | -0.71 | 0.206239 | 0.858 |
| ITM2C     | -0.71 | 0.206239 | 0.858 |
| KCNN2     | -0.71 | 0.206239 | 0.858 |
| KRTAP9-6  | -0.71 | 0.206239 | 0.858 |
| MFRP      | -0.71 | 0.206238 | 0.858 |
| OLFML3    | -0.71 | 0.206238 | 0.858 |
| PIGR      | -0.71 | 0.206238 | 0.858 |
| PIWIL1    | -0.71 | 0.206238 | 0.858 |
| PRAMEF5   | -0.71 | 0.206239 | 0.858 |
| PSMC3IP   | -0.71 | 0.206239 | 0.858 |
| RAB11FIP3 | -0.71 | 0.206239 | 0.858 |
| REPS1     | -0.71 | 0.206239 | 0.858 |
| RGS16     | -0.71 | 0.206239 | 0.858 |
| SP4       | -0.71 | 0.206239 | 0.858 |
| STEAP2    | -0.71 | 0.206239 | 0.858 |
| TAX1BP1   | -0.71 | 0.206239 | 0.858 |
| TLR5      | -0.71 | 0.206238 | 0.858 |
| TNFRSF9   | -0.71 | 0.206238 | 0.858 |
| TOR2A     | -0.71 | 0.206239 | 0.858 |
| XCL2      | -0.71 | 0.206238 | 0.858 |
| ZBTB7C    | -0.71 | 0.206239 | 0.858 |
| ATP6V1B2  | -0.7  | 0.212513 | 0.859 |
| C2orf91   | -0.7  | 0.212514 | 0.859 |
| C3orf72   | -0.7  | 0.212514 | 0.859 |
| CEP350    | -0.7  | 0.236326 | 0.878 |
| CPE       | -0.7  | 0.212514 | 0.859 |
| CRHR2     | -0.7  | 0.236325 | 0.878 |
| CUL2      | -0.7  | 0.212513 | 0.859 |
| CYP26C1   | -0.7  | 0.212514 | 0.859 |

|           |      |          |       |
|-----------|------|----------|-------|
| FAM115A   | -0.7 | 0.212514 | 0.859 |
| FAM129A   | -0.7 | 0.212513 | 0.859 |
| FBXO9     | -0.7 | 0.212514 | 0.859 |
| GPA33     | -0.7 | 0.212514 | 0.859 |
| H2AFB1    | -0.7 | 0.212513 | 0.859 |
| HERC6     | -0.7 | 0.212514 | 0.859 |
| HIGD2A    | -0.7 | 0.212513 | 0.859 |
| HLX       | -0.7 | 0.212514 | 0.859 |
| HMG2      | -0.7 | 0.236325 | 0.878 |
| HNRNPM    | -0.7 | 0.212514 | 0.859 |
| HTR7      | -0.7 | 0.212514 | 0.859 |
| ISCU      | -0.7 | 0.329607 | 0.908 |
| KIF14     | -0.7 | 0.212513 | 0.859 |
| KRTAP21-3 | -0.7 | 0.212513 | 0.859 |
| KRTAP26-1 | -0.7 | 0.212513 | 0.859 |
| KRTAP5-3  | -0.7 | 0.212514 | 0.859 |
| L3HYPDH   | -0.7 | 0.212513 | 0.859 |
| LONRF3    | -0.7 | 0.212513 | 0.859 |
| MPP4      | -0.7 | 0.212514 | 0.859 |
| NIPSNAP3A | -0.7 | 0.212513 | 0.859 |
| NPRL2     | -0.7 | 0.212514 | 0.859 |
| NR1D2     | -0.7 | 0.212513 | 0.859 |
| NRBP1     | -0.7 | 0.236325 | 0.878 |
| OR10G9    | -0.7 | 0.212514 | 0.859 |
| OR2T4     | -0.7 | 0.212514 | 0.859 |
| OR5AS1    | -0.7 | 0.212513 | 0.859 |
| PBX3      | -0.7 | 0.212514 | 0.859 |
| PKHD1     | -0.7 | 0.212514 | 0.859 |
| PPP2R5E   | -0.7 | 0.212514 | 0.859 |
| PROC      | -0.7 | 0.212514 | 0.859 |
| RAB3A     | -0.7 | 0.212514 | 0.859 |
| RABAC1    | -0.7 | 0.212513 | 0.859 |
| RBM18     | -0.7 | 0.212514 | 0.859 |
| RBM20     | -0.7 | 0.212514 | 0.859 |
| RNF222    | -0.7 | 0.212514 | 0.859 |
| S100A2    | -0.7 | 0.212513 | 0.859 |
| SDF4      | -0.7 | 0.212514 | 0.859 |
| SETBP1    | -0.7 | 0.212514 | 0.859 |
| SLC35F1   | -0.7 | 0.236325 | 0.878 |
| SLC35G5   | -0.7 | 0.212514 | 0.859 |
| SLC4A5    | -0.7 | 0.212513 | 0.859 |
| SMIM4     | -0.7 | 0.212514 | 0.859 |
| SOAT2     | -0.7 | 0.212513 | 0.859 |
| SOCS2     | -0.7 | 0.212514 | 0.859 |
| SOX12     | -0.7 | 0.263099 | 0.888 |
| SPRR4     | -0.7 | 0.212514 | 0.859 |
| STMN4     | -0.7 | 0.212514 | 0.859 |

|           |       |          |       |
|-----------|-------|----------|-------|
| TBC1D1    | -0.7  | 0.212513 | 0.859 |
| TBX3      | -0.7  | 0.236325 | 0.878 |
| TMPRSS11E | -0.7  | 0.212513 | 0.859 |
| TNS4      | -0.7  | 0.212514 | 0.859 |
| TRANK1    | -0.7  | 0.212513 | 0.859 |
| TRPM3     | -0.7  | 0.212514 | 0.859 |
| WBP4      | -0.7  | 0.212514 | 0.859 |
| WDR76     | -0.7  | 0.212513 | 0.859 |
| XRCC5     | -0.7  | 0.236326 | 0.878 |
| YRDC      | -0.7  | 0.294033 | 0.9   |
| ZBTB11    | -0.7  | 0.236326 | 0.878 |
| ZNF837    | -0.7  | 0.212514 | 0.859 |
| ABCA8     | -0.69 | 0.242921 | 0.879 |
| ABCG8     | -0.69 | 0.21898  | 0.868 |
| AKAP14    | -0.69 | 0.242921 | 0.879 |
| AP3M2     | -0.69 | 0.21898  | 0.868 |
| AQP9      | -0.69 | 0.21898  | 0.868 |
| BSCL2     | -0.69 | 0.242921 | 0.879 |
| C14orf159 | -0.69 | 0.21898  | 0.868 |
| CD209     | -0.69 | 0.21898  | 0.868 |
| CD82      | -0.69 | 0.24292  | 0.879 |
| CNPY2     | -0.69 | 0.21898  | 0.868 |
| DTX1      | -0.69 | 0.21898  | 0.868 |
| FAM157A   | -0.69 | 0.21898  | 0.868 |
| FAM220A   | -0.69 | 0.21898  | 0.868 |
| FAM72A    | -0.69 | 0.21898  | 0.868 |
| FAM96B    | -0.69 | 0.21898  | 0.868 |
| FCER1G    | -0.69 | 0.21898  | 0.868 |
| FGF10     | -0.69 | 0.21898  | 0.868 |
| GEMIN4    | -0.69 | 0.21898  | 0.868 |
| HOXD4     | -0.69 | 0.21898  | 0.868 |
| IL1RL2    | -0.69 | 0.21898  | 0.868 |
| IMP4      | -0.69 | 0.300689 | 0.9   |
| INS       | -0.69 | 0.218979 | 0.868 |
| JOSD2     | -0.69 | 0.21898  | 0.868 |
| KANK4     | -0.69 | 0.21898  | 0.868 |
| KIAA1328  | -0.69 | 0.218979 | 0.868 |
| KLKB1     | -0.69 | 0.21898  | 0.868 |
| KRBOX1    | -0.69 | 0.21898  | 0.868 |
| MAN1B1    | -0.69 | 0.21898  | 0.868 |
| MAPK13    | -0.69 | 0.242921 | 0.879 |
| MARCO     | -0.69 | 0.242921 | 0.879 |
| MIIP      | -0.69 | 0.242921 | 0.879 |
| MRGPRX2   | -0.69 | 0.21898  | 0.868 |
| MX1       | -0.69 | 0.242921 | 0.879 |
| NCCRP1    | -0.69 | 0.21898  | 0.868 |
| NPFFR2    | -0.69 | 0.218979 | 0.868 |

|          |       |          |       |
|----------|-------|----------|-------|
| NUBP2    | -0.69 | 0.21898  | 0.868 |
| OAF      | -0.69 | 0.21898  | 0.868 |
| PRKCG    | -0.69 | 0.269827 | 0.888 |
| PRMT1    | -0.69 | 0.269827 | 0.888 |
| PSMA4    | -0.69 | 0.242921 | 0.879 |
| RCOR2    | -0.69 | 0.21898  | 0.868 |
| RNF10    | -0.69 | 0.242921 | 0.879 |
| SAC3D1   | -0.69 | 0.21898  | 0.868 |
| SENP5    | -0.69 | 0.21898  | 0.868 |
| SIRT3    | -0.69 | 0.21898  | 0.868 |
| SPON2    | -0.69 | 0.21898  | 0.868 |
| SYF2     | -0.69 | 0.21898  | 0.868 |
| TAF4B    | -0.69 | 0.21898  | 0.868 |
| TUBB2A   | -0.69 | 0.218979 | 0.868 |
| TUBG1    | -0.69 | 0.269827 | 0.888 |
| TUBGCP6  | -0.69 | 0.24292  | 0.879 |
| TXNDC5   | -0.69 | 0.21898  | 0.868 |
| VWCE     | -0.69 | 0.218979 | 0.868 |
| WNK1     | -0.69 | 0.242921 | 0.879 |
| ZFP91    | -0.69 | 0.21898  | 0.868 |
| ZIC1     | -0.69 | 0.269827 | 0.888 |
| AKT3     | -0.68 | 0.225496 | 0.868 |
| ALG2     | -0.68 | 0.249616 | 0.879 |
| ATP1A2   | -0.68 | 0.249616 | 0.879 |
| BCAS3    | -0.68 | 0.225496 | 0.868 |
| BDH2     | -0.68 | 0.225496 | 0.868 |
| BRK1     | -0.68 | 0.225496 | 0.868 |
| C12orf66 | -0.68 | 0.225496 | 0.868 |
| C17orf47 | -0.68 | 0.225496 | 0.868 |
| C19orf70 | -0.68 | 0.225496 | 0.868 |
| C6orf165 | -0.68 | 0.225496 | 0.868 |
| CCSER2   | -0.68 | 0.225496 | 0.868 |
| CREB3L4  | -0.68 | 0.249616 | 0.879 |
| CYP4F8   | -0.68 | 0.225496 | 0.868 |
| DCTN1    | -0.68 | 0.225496 | 0.868 |
| DEFB121  | -0.68 | 0.225496 | 0.868 |
| DIAPH3   | -0.68 | 0.276574 | 0.891 |
| DNAJC9   | -0.68 | 0.249617 | 0.879 |
| DSP      | -0.68 | 0.225496 | 0.868 |
| FAM109A  | -0.68 | 0.225496 | 0.868 |
| FAM50A   | -0.68 | 0.384992 | 0.923 |
| FGF5     | -0.68 | 0.249616 | 0.879 |
| FRMPD1   | -0.68 | 0.225496 | 0.868 |
| GJA5     | -0.68 | 0.225496 | 0.868 |
| GLI3     | -0.68 | 0.225496 | 0.868 |
| GREM2    | -0.68 | 0.249616 | 0.879 |
| GRK1     | -0.68 | 0.249616 | 0.879 |

|          |       |          |       |
|----------|-------|----------|-------|
| HLA-DQB2 | -0.68 | 0.225497 | 0.868 |
| HSD17B6  | -0.68 | 0.225496 | 0.868 |
| IMPA2    | -0.68 | 0.225496 | 0.868 |
| INPP5B   | -0.68 | 0.225496 | 0.868 |
| ITPR1    | -0.68 | 0.225496 | 0.868 |
| KCTD19   | -0.68 | 0.249616 | 0.879 |
| KIF15    | -0.68 | 0.225496 | 0.868 |
| KLHL24   | -0.68 | 0.249616 | 0.879 |
| LEFTY1   | -0.68 | 0.225496 | 0.868 |
| LRRC57   | -0.68 | 0.225496 | 0.868 |
| MAP3K19  | -0.68 | 0.225496 | 0.868 |
| MAP4K4   | -0.68 | 0.225497 | 0.868 |
| MTRNR2L5 | -0.68 | 0.249616 | 0.879 |
| MYO1G    | -0.68 | 0.225496 | 0.868 |
| MYOM1    | -0.68 | 0.225496 | 0.868 |
| NDUFA4L2 | -0.68 | 0.225496 | 0.868 |
| NPAS2    | -0.68 | 0.225496 | 0.868 |
| NUS1     | -0.68 | 0.225496 | 0.868 |
| OCM2     | -0.68 | 0.225496 | 0.868 |
| OLR1     | -0.68 | 0.225496 | 0.868 |
| OR6Q1    | -0.68 | 0.225497 | 0.868 |
| PCDHB2   | -0.68 | 0.225496 | 0.868 |
| PLRG1    | -0.68 | 0.249616 | 0.879 |
| POLR1D   | -0.68 | 0.225497 | 0.868 |
| RIMKLA   | -0.68 | 0.225496 | 0.868 |
| RNF216   | -0.68 | 0.225496 | 0.868 |
| RWDD2A   | -0.68 | 0.225497 | 0.868 |
| SORCS3   | -0.68 | 0.225496 | 0.868 |
| SOWAHD   | -0.68 | 0.225496 | 0.868 |
| SSBP4    | -0.68 | 0.225497 | 0.868 |
| SV2C     | -0.68 | 0.225496 | 0.868 |
| SYT2     | -0.68 | 0.249617 | 0.879 |
| SZT2     | -0.68 | 0.225496 | 0.868 |
| TAS2R9   | -0.68 | 0.225496 | 0.868 |
| TBC1D22A | -0.68 | 0.225496 | 0.868 |
| TFDP1    | -0.68 | 0.249616 | 0.879 |
| TGDS     | -0.68 | 0.225496 | 0.868 |
| TGFA     | -0.68 | 0.225497 | 0.868 |
| TRIM9    | -0.68 | 0.225496 | 0.868 |
| WAS      | -0.68 | 0.225496 | 0.868 |
| ZFP14    | -0.68 | 0.225496 | 0.868 |
| ZIC5     | -0.68 | 0.249616 | 0.879 |
| ZNF451   | -0.68 | 0.249616 | 0.879 |
| ZNF705D  | -0.68 | 0.225496 | 0.868 |
| ABCA1    | -0.67 | 0.232222 | 0.871 |
| AIDA     | -0.67 | 0.256435 | 0.886 |
| APOBEC3H | -0.67 | 0.232222 | 0.871 |

|           |       |          |       |
|-----------|-------|----------|-------|
| BIN2      | -0.67 | 0.232222 | 0.871 |
| C15orf41  | -0.67 | 0.232222 | 0.871 |
| C1orf51   | -0.67 | 0.232222 | 0.871 |
| C7orf25   | -0.67 | 0.232222 | 0.871 |
| CCDC135   | -0.67 | 0.232222 | 0.871 |
| CCDC169   | -0.67 | 0.232222 | 0.871 |
| CEACAM3   | -0.67 | 0.232222 | 0.871 |
| CHD5      | -0.67 | 0.232222 | 0.871 |
| CLHC1     | -0.67 | 0.232222 | 0.871 |
| DDX55     | -0.67 | 0.256435 | 0.886 |
| DHX34     | -0.67 | 0.232222 | 0.871 |
| DRC1      | -0.67 | 0.232222 | 0.871 |
| EIF5AL1   | -0.67 | 0.232222 | 0.871 |
| FGF2      | -0.67 | 0.232222 | 0.871 |
| FOXD4L4   | -0.67 | 0.232222 | 0.871 |
| GGNBP2    | -0.67 | 0.232222 | 0.871 |
| GK        | -0.67 | 0.232222 | 0.871 |
| HOXB2     | -0.67 | 0.232222 | 0.871 |
| JAG1      | -0.67 | 0.232222 | 0.871 |
| JOSD1     | -0.67 | 0.232222 | 0.871 |
| METTL18   | -0.67 | 0.232222 | 0.871 |
| MNS1      | -0.67 | 0.256435 | 0.886 |
| MTTP      | -0.67 | 0.232222 | 0.871 |
| NAALADL1  | -0.67 | 0.256435 | 0.886 |
| NFE2L1    | -0.67 | 0.232222 | 0.871 |
| NHLH1     | -0.67 | 0.232222 | 0.871 |
| OLFML2B   | -0.67 | 0.232222 | 0.871 |
| OR51D1    | -0.67 | 0.232222 | 0.871 |
| PHACTR1   | -0.67 | 0.232222 | 0.871 |
| PRAMEF6   | -0.67 | 0.232222 | 0.871 |
| PRR5-ARHC | -0.67 | 0.256435 | 0.886 |
| PRRT1     | -0.67 | 0.232222 | 0.871 |
| PSMA8     | -0.67 | 0.256435 | 0.886 |
| PTH       | -0.67 | 0.232222 | 0.871 |
| RBM15     | -0.67 | 0.232222 | 0.871 |
| RPL36     | -0.67 | 0.314494 | 0.903 |
| SEC14L1   | -0.67 | 0.232222 | 0.871 |
| SERINC1   | -0.67 | 0.232222 | 0.871 |
| SHOX      | -0.67 | 0.232222 | 0.871 |
| SLC25A43  | -0.67 | 0.232222 | 0.871 |
| SLCO4C1   | -0.67 | 0.256435 | 0.886 |
| SLX1B     | -0.67 | 0.232222 | 0.871 |
| SMIM23    | -0.67 | 0.232222 | 0.871 |
| SPANXB2   | -0.67 | 0.232222 | 0.871 |
| STRC      | -0.67 | 0.232222 | 0.871 |
| SUDS3     | -0.67 | 0.256435 | 0.886 |
| THNSL2    | -0.67 | 0.232222 | 0.871 |

|           |       |          |       |
|-----------|-------|----------|-------|
| TMEM186   | -0.67 | 0.232222 | 0.871 |
| TNFRSF8   | -0.67 | 0.232222 | 0.871 |
| TRAPPC5   | -0.67 | 0.232222 | 0.871 |
| UBXN10    | -0.67 | 0.232222 | 0.871 |
| VLDLR     | -0.67 | 0.232222 | 0.871 |
| VRK3      | -0.67 | 0.232222 | 0.871 |
| WTIP      | -0.67 | 0.232222 | 0.871 |
| ZNF670    | -0.67 | 0.232222 | 0.871 |
| ACTB      | -0.66 | 0.263421 | 0.888 |
| ATN1      | -0.66 | 0.239085 | 0.878 |
| BMP15     | -0.66 | 0.239085 | 0.878 |
| CCAR2     | -0.66 | 0.26342  | 0.888 |
| CCDC181   | -0.66 | 0.239086 | 0.878 |
| CFP       | -0.66 | 0.239086 | 0.878 |
| CHGB      | -0.66 | 0.263421 | 0.888 |
| CNOT7     | -0.66 | 0.239086 | 0.878 |
| COL6A1    | -0.66 | 0.239085 | 0.878 |
| DMXL1     | -0.66 | 0.239085 | 0.878 |
| DNAJB5    | -0.66 | 0.239085 | 0.878 |
| DNAJC5    | -0.66 | 0.239086 | 0.878 |
| DOCK7     | -0.66 | 0.239086 | 0.878 |
| DQX1      | -0.66 | 0.239085 | 0.878 |
| ELAVL4    | -0.66 | 0.239085 | 0.878 |
| EPM2A     | -0.66 | 0.239085 | 0.878 |
| FAM115C   | -0.66 | 0.239086 | 0.878 |
| FAM9C     | -0.66 | 0.263421 | 0.888 |
| GALNT2    | -0.66 | 0.239085 | 0.878 |
| GCSAM     | -0.66 | 0.239085 | 0.878 |
| GEMIN6    | -0.66 | 0.239086 | 0.878 |
| HNRNPDL   | -0.66 | 0.263421 | 0.888 |
| KRTAP12-1 | -0.66 | 0.239086 | 0.878 |
| KRTAP3-3  | -0.66 | 0.239086 | 0.878 |
| KRTAP5-11 | -0.66 | 0.239085 | 0.878 |
| LAGE3     | -0.66 | 0.26342  | 0.888 |
| LIMS1     | -0.66 | 0.239085 | 0.878 |
| MYO5B     | -0.66 | 0.239086 | 0.878 |
| NPFF      | -0.66 | 0.239086 | 0.878 |
| OGDH      | -0.66 | 0.239086 | 0.878 |
| OR51Q1    | -0.66 | 0.263421 | 0.888 |
| OR6C1     | -0.66 | 0.239086 | 0.878 |
| PAK1IP1   | -0.66 | 0.26342  | 0.888 |
| PDCD4     | -0.66 | 0.239085 | 0.878 |
| PLS3      | -0.66 | 0.239085 | 0.878 |
| PNMA1     | -0.66 | 0.239086 | 0.878 |
| PPARA     | -0.66 | 0.239085 | 0.878 |
| PSPC1     | -0.66 | 0.239085 | 0.878 |
| PTX4      | -0.66 | 0.239085 | 0.878 |

|           |       |          |       |
|-----------|-------|----------|-------|
| RIF1      | -0.66 | 0.239086 | 0.878 |
| RNASEH2B  | -0.66 | 0.239086 | 0.878 |
| SAPCD1    | -0.66 | 0.239085 | 0.878 |
| SH2D4B    | -0.66 | 0.239085 | 0.878 |
| SLC13A4   | -0.66 | 0.26342  | 0.888 |
| SLX1A     | -0.66 | 0.239086 | 0.878 |
| SNCB      | -0.66 | 0.26342  | 0.888 |
| SPATA8    | -0.66 | 0.26342  | 0.888 |
| SST       | -0.66 | 0.239085 | 0.878 |
| ST3GAL6   | -0.66 | 0.239085 | 0.878 |
| STAG2     | -0.66 | 0.239086 | 0.878 |
| SYTL3     | -0.66 | 0.239086 | 0.878 |
| TCEA1     | -0.66 | 0.26342  | 0.888 |
| TCEAL3    | -0.66 | 0.263421 | 0.888 |
| TFAP2D    | -0.66 | 0.26342  | 0.888 |
| TMEM67    | -0.66 | 0.239085 | 0.878 |
| TTYH3     | -0.66 | 0.26342  | 0.888 |
| ZNF396    | -0.66 | 0.239085 | 0.878 |
| ACAP1     | -0.65 | 0.246043 | 0.879 |
| AGAP4     | -0.65 | 0.246043 | 0.879 |
| ATM       | -0.65 | 0.246043 | 0.879 |
| C1QL4     | -0.65 | 0.270513 | 0.888 |
| CCDC102A  | -0.65 | 0.246043 | 0.879 |
| CCNO      | -0.65 | 0.246043 | 0.879 |
| CFH       | -0.65 | 0.246043 | 0.879 |
| CLDN24    | -0.65 | 0.246043 | 0.879 |
| CNTNAP2   | -0.65 | 0.270513 | 0.888 |
| CRTC1     | -0.65 | 0.246043 | 0.879 |
| CSRP2BP   | -0.65 | 0.246043 | 0.879 |
| CYP4F11   | -0.65 | 0.246043 | 0.879 |
| ELP5      | -0.65 | 0.246043 | 0.879 |
| FAM127B   | -0.65 | 0.246043 | 0.879 |
| FBXW11    | -0.65 | 0.246043 | 0.879 |
| FGD2      | -0.65 | 0.246043 | 0.879 |
| FOXD4L2   | -0.65 | 0.246043 | 0.879 |
| FOXN4     | -0.65 | 0.246043 | 0.879 |
| FPGS      | -0.65 | 0.246043 | 0.879 |
| FREM1     | -0.65 | 0.246043 | 0.879 |
| GFRA3     | -0.65 | 0.246043 | 0.879 |
| GNG12     | -0.65 | 0.246043 | 0.879 |
| GOLGA6L10 | -0.65 | 0.246043 | 0.879 |
| HBM       | -0.65 | 0.246043 | 0.879 |
| HEBP1     | -0.65 | 0.246043 | 0.879 |
| HIST1H4D  | -0.65 | 0.270513 | 0.888 |
| HMBOX1    | -0.65 | 0.246043 | 0.879 |
| HSD17B10  | -0.65 | 0.270512 | 0.888 |
| IGF2      | -0.65 | 0.270512 | 0.888 |

|           |       |          |       |
|-----------|-------|----------|-------|
| IVD       | -0.65 | 0.246043 | 0.879 |
| KBTBD7    | -0.65 | 0.246043 | 0.879 |
| KLHL40    | -0.65 | 0.246043 | 0.879 |
| KNDC1     | -0.65 | 0.270513 | 0.888 |
| KRTAP20-1 | -0.65 | 0.246043 | 0.879 |
| LAPTM5    | -0.65 | 0.246043 | 0.879 |
| LOC100506 | -0.65 | 0.270513 | 0.888 |
| NAA30     | -0.65 | 0.246043 | 0.879 |
| NEURL2    | -0.65 | 0.270513 | 0.888 |
| NIPBL     | -0.65 | 0.297757 | 0.9   |
| NUGGC     | -0.65 | 0.270512 | 0.888 |
| OLIG2     | -0.65 | 0.246043 | 0.879 |
| OR7E24    | -0.65 | 0.246043 | 0.879 |
| OR7G3     | -0.65 | 0.270513 | 0.888 |
| OTUD7B    | -0.65 | 0.246043 | 0.879 |
| PCNX      | -0.65 | 0.270512 | 0.888 |
| PRRG2     | -0.65 | 0.246043 | 0.879 |
| PRRG3     | -0.65 | 0.246043 | 0.879 |
| RAG2      | -0.65 | 0.246043 | 0.879 |
| SDCBP     | -0.65 | 0.246043 | 0.879 |
| SEC61G    | -0.65 | 0.246043 | 0.879 |
| SLIT2     | -0.65 | 0.246043 | 0.879 |
| STK16     | -0.65 | 0.246043 | 0.879 |
| TCAP      | -0.65 | 0.246043 | 0.879 |
| TCP11     | -0.65 | 0.246043 | 0.879 |
| TMIGD1    | -0.65 | 0.246043 | 0.879 |
| TRIM35    | -0.65 | 0.246043 | 0.879 |
| TTL       | -0.65 | 0.246043 | 0.879 |
| U2SURP    | -0.65 | 0.297757 | 0.9   |
| WDR31     | -0.65 | 0.246043 | 0.879 |
| ZC3H11A   | -0.65 | 0.246043 | 0.879 |
| ZNF710    | -0.65 | 0.246043 | 0.879 |
| ZNF800    | -0.65 | 0.246043 | 0.879 |
| ZP3       | -0.65 | 0.246043 | 0.879 |
| ACO1      | -0.64 | 0.25315  | 0.879 |
| ACTA1     | -0.64 | 0.25315  | 0.879 |
| ADAT2     | -0.64 | 0.25315  | 0.879 |
| ASPN      | -0.64 | 0.25315  | 0.879 |
| ATP6V0E1  | -0.64 | 0.25315  | 0.879 |
| BBS2      | -0.64 | 0.25315  | 0.879 |
| BZW2      | -0.64 | 0.253149 | 0.879 |
| CARNS1    | -0.64 | 0.253149 | 0.879 |
| CBFB      | -0.64 | 0.25315  | 0.879 |
| CCDC125   | -0.64 | 0.25315  | 0.879 |
| CCL8      | -0.64 | 0.25315  | 0.879 |
| CDKN2B    | -0.64 | 0.25315  | 0.879 |
| CMTM1     | -0.64 | 0.25315  | 0.879 |

|           |       |          |       |
|-----------|-------|----------|-------|
| CUL4A     | -0.64 | 0.25315  | 0.879 |
| DARC      | -0.64 | 0.25315  | 0.879 |
| DNAAF2    | -0.64 | 0.25315  | 0.879 |
| DNAJC16   | -0.64 | 0.25315  | 0.879 |
| DNAL4     | -0.64 | 0.25315  | 0.879 |
| EGLN3     | -0.64 | 0.25315  | 0.879 |
| ETFA      | -0.64 | 0.25315  | 0.879 |
| FAM189B   | -0.64 | 0.25315  | 0.879 |
| FNDCC8    | -0.64 | 0.277763 | 0.891 |
| GAL3ST1   | -0.64 | 0.25315  | 0.879 |
| GLTPD2    | -0.64 | 0.277763 | 0.891 |
| GMPS      | -0.64 | 0.335971 | 0.908 |
| GPR150    | -0.64 | 0.277763 | 0.891 |
| HIST1H2AJ | -0.64 | 0.25315  | 0.879 |
| HIST1H4C  | -0.64 | 0.25315  | 0.879 |
| HPSE      | -0.64 | 0.25315  | 0.879 |
| HS3ST1    | -0.64 | 0.25315  | 0.879 |
| IFITM1    | -0.64 | 0.253149 | 0.879 |
| KBTBD2    | -0.64 | 0.25315  | 0.879 |
| KCNK1     | -0.64 | 0.25315  | 0.879 |
| KCP       | -0.64 | 0.25315  | 0.879 |
| KIAA1467  | -0.64 | 0.25315  | 0.879 |
| LMLN      | -0.64 | 0.25315  | 0.879 |
| MAU2      | -0.64 | 0.335972 | 0.908 |
| MB21D2    | -0.64 | 0.25315  | 0.879 |
| MCAM      | -0.64 | 0.25315  | 0.879 |
| MEI1      | -0.64 | 0.25315  | 0.879 |
| MRPL43    | -0.64 | 0.25315  | 0.879 |
| MYLK4     | -0.64 | 0.25315  | 0.879 |
| NAP1L2    | -0.64 | 0.25315  | 0.879 |
| NFIL3     | -0.64 | 0.25315  | 0.879 |
| NSMAF     | -0.64 | 0.25315  | 0.879 |
| NUDT11    | -0.64 | 0.25315  | 0.879 |
| OR10G8    | -0.64 | 0.25315  | 0.879 |
| OR7A5     | -0.64 | 0.277763 | 0.891 |
| PCGF6     | -0.64 | 0.253149 | 0.879 |
| PGRMC1    | -0.64 | 0.253149 | 0.879 |
| PIK3AP1   | -0.64 | 0.25315  | 0.879 |
| PLAC8     | -0.64 | 0.25315  | 0.879 |
| PPP6R2    | -0.64 | 0.253149 | 0.879 |
| PZP       | -0.64 | 0.277763 | 0.891 |
| RPP25     | -0.64 | 0.25315  | 0.879 |
| RXRA      | -0.64 | 0.25315  | 0.879 |
| SERPINB5  | -0.64 | 0.253149 | 0.879 |
| SGSH      | -0.64 | 0.277763 | 0.891 |
| SLC22A17  | -0.64 | 0.253149 | 0.879 |
| SLC7A11   | -0.64 | 0.25315  | 0.879 |

|          |       |          |       |
|----------|-------|----------|-------|
| SPIB     | -0.64 | 0.25315  | 0.879 |
| TEC      | -0.64 | 0.25315  | 0.879 |
| TEX36    | -0.64 | 0.25315  | 0.879 |
| TGM3     | -0.64 | 0.253149 | 0.879 |
| TOPAZ1   | -0.64 | 0.25315  | 0.879 |
| TRIM7    | -0.64 | 0.25315  | 0.879 |
| UXT      | -0.64 | 0.25315  | 0.879 |
| VPS9D1   | -0.64 | 0.25315  | 0.879 |
| XRRA1    | -0.64 | 0.25315  | 0.879 |
| ZNF705E  | -0.64 | 0.4127   | 0.93  |
| ZNF80    | -0.64 | 0.253149 | 0.879 |
| ABCA7    | -0.63 | 0.260413 | 0.886 |
| ADORA2B  | -0.63 | 0.260413 | 0.886 |
| ARHGAP4  | -0.63 | 0.260413 | 0.886 |
| BCL9L    | -0.63 | 0.260412 | 0.886 |
| C11orf87 | -0.63 | 0.260413 | 0.886 |
| CCDC86   | -0.63 | 0.260413 | 0.886 |
| CLEC4M   | -0.63 | 0.260413 | 0.886 |
| CNOT3    | -0.63 | 0.312477 | 0.903 |
| COX5A    | -0.63 | 0.2851   | 0.894 |
| CRTAM    | -0.63 | 0.2851   | 0.894 |
| CTAGE1   | -0.63 | 0.260412 | 0.886 |
| CYP4V2   | -0.63 | 0.260413 | 0.886 |
| DDX25    | -0.63 | 0.260413 | 0.886 |
| DEFB125  | -0.63 | 0.260413 | 0.886 |
| DGCR8    | -0.63 | 0.260413 | 0.886 |
| EFCAB5   | -0.63 | 0.260413 | 0.886 |
| GFI1     | -0.63 | 0.260413 | 0.886 |
| GLRA4    | -0.63 | 0.260412 | 0.886 |
| HAUS7    | -0.63 | 0.260413 | 0.886 |
| HORMAD2  | -0.63 | 0.260413 | 0.886 |
| ITIH6    | -0.63 | 0.260412 | 0.886 |
| KSR2     | -0.63 | 0.260413 | 0.886 |
| LEF1     | -0.63 | 0.260413 | 0.886 |
| MAP2K2   | -0.63 | 0.260412 | 0.886 |
| METTL12  | -0.63 | 0.260413 | 0.886 |
| MIS12    | -0.63 | 0.260413 | 0.886 |
| MSL3     | -0.63 | 0.285099 | 0.894 |
| MYO19    | -0.63 | 0.260413 | 0.886 |
| NANOS1   | -0.63 | 0.2851   | 0.894 |
| NRGN     | -0.63 | 0.260413 | 0.886 |
| OR11A1   | -0.63 | 0.260412 | 0.886 |
| OR2L3    | -0.63 | 0.260413 | 0.886 |
| PCDHB14  | -0.63 | 0.260413 | 0.886 |
| PDE2A    | -0.63 | 0.260413 | 0.886 |
| PIM1     | -0.63 | 0.285099 | 0.894 |
| PRAMEF21 | -0.63 | 0.2851   | 0.894 |

|           |       |          |       |
|-----------|-------|----------|-------|
| PTK7      | -0.63 | 0.2851   | 0.894 |
| RAB4A     | -0.63 | 0.260412 | 0.886 |
| RNF175    | -0.63 | 0.260413 | 0.886 |
| RPL10A    | -0.63 | 0.2851   | 0.894 |
| SLC38A9   | -0.63 | 0.260413 | 0.886 |
| SNAPC3    | -0.63 | 0.260413 | 0.886 |
| SPATA31A2 | -0.63 | 0.260413 | 0.886 |
| SPATS1    | -0.63 | 0.260413 | 0.886 |
| SRP14     | -0.63 | 0.260413 | 0.886 |
| STIM1     | -0.63 | 0.260412 | 0.886 |
| TCAF1     | -0.63 | 0.2851   | 0.894 |
| TF        | -0.63 | 0.260413 | 0.886 |
| TFAP2A    | -0.63 | 0.260413 | 0.886 |
| TMEM176B  | -0.63 | 0.260413 | 0.886 |
| TMEM223   | -0.63 | 0.260413 | 0.886 |
| TMPRSS11A | -0.63 | 0.260413 | 0.886 |
| TRABD2A   | -0.63 | 0.260413 | 0.886 |
| TRIM3     | -0.63 | 0.260413 | 0.886 |
| TUB       | -0.63 | 0.260413 | 0.886 |
| TXNRD1    | -0.63 | 0.2851   | 0.894 |
| ZG16      | -0.63 | 0.260413 | 0.886 |
| ZNF121    | -0.63 | 0.260413 | 0.886 |
| ZSCAN12   | -0.63 | 0.378824 | 0.923 |
| ADAM2     | -0.62 | 0.267859 | 0.888 |
| ANKDD1B   | -0.62 | 0.267858 | 0.888 |
| ARHGAP39  | -0.62 | 0.292508 | 0.898 |
| BCAR3     | -0.62 | 0.267859 | 0.888 |
| C12orf45  | -0.62 | 0.267858 | 0.888 |
| C16orf80  | -0.62 | 0.292507 | 0.898 |
| CCDC170   | -0.62 | 0.267858 | 0.888 |
| CD3EAP    | -0.62 | 0.267858 | 0.888 |
| CSTF1     | -0.62 | 0.267858 | 0.888 |
| CUL3      | -0.62 | 0.267858 | 0.888 |
| CXorf27   | -0.62 | 0.267859 | 0.888 |
| CYP2A6    | -0.62 | 0.267858 | 0.888 |
| DDX1      | -0.62 | 0.267859 | 0.888 |
| EGR3      | -0.62 | 0.267859 | 0.888 |
| ENAM      | -0.62 | 0.267858 | 0.888 |
| ERAS      | -0.62 | 0.267858 | 0.888 |
| EXOC5     | -0.62 | 0.267858 | 0.888 |
| FAM109B   | -0.62 | 0.320042 | 0.906 |
| FIZ1      | -0.62 | 0.292507 | 0.898 |
| GLIS1     | -0.62 | 0.267859 | 0.888 |
| GPR1      | -0.62 | 0.267858 | 0.888 |
| GPR152    | -0.62 | 0.292507 | 0.898 |
| HDAC4     | -0.62 | 0.267859 | 0.888 |
| IFIT2     | -0.62 | 0.267858 | 0.888 |

|          |       |          |       |
|----------|-------|----------|-------|
| IRX4     | -0.62 | 0.267859 | 0.888 |
| KANK1    | -0.62 | 0.267858 | 0.888 |
| LMOD3    | -0.62 | 0.320042 | 0.906 |
| LNK1     | -0.62 | 0.267859 | 0.888 |
| LRRIQ3   | -0.62 | 0.267859 | 0.888 |
| MROH6    | -0.62 | 0.267859 | 0.888 |
| NPRL3    | -0.62 | 0.320043 | 0.906 |
| NVL      | -0.62 | 0.320043 | 0.906 |
| NWD1     | -0.62 | 0.267859 | 0.888 |
| OR51G2   | -0.62 | 0.267858 | 0.888 |
| PDP1     | -0.62 | 0.267858 | 0.888 |
| PGR      | -0.62 | 0.267859 | 0.888 |
| PHLDA2   | -0.62 | 0.267859 | 0.888 |
| PKD1L1   | -0.62 | 0.267858 | 0.888 |
| PLAG1    | -0.62 | 0.267859 | 0.888 |
| PSMD4    | -0.62 | 0.320042 | 0.906 |
| PTMS     | -0.62 | 0.292507 | 0.898 |
| SALL4    | -0.62 | 0.267859 | 0.888 |
| SCN9A    | -0.62 | 0.267859 | 0.888 |
| SECTM1   | -0.62 | 0.267859 | 0.888 |
| SEMA3A   | -0.62 | 0.267858 | 0.888 |
| SLC4A1AP | -0.62 | 0.267859 | 0.888 |
| SNAPC1   | -0.62 | 0.267858 | 0.888 |
| SP6      | -0.62 | 0.267858 | 0.888 |
| TARDBP   | -0.62 | 0.267859 | 0.888 |
| TDG      | -0.62 | 0.267858 | 0.888 |
| TM4SF20  | -0.62 | 0.267858 | 0.888 |
| TMBIM4   | -0.62 | 0.267859 | 0.888 |
| TMCO5A   | -0.62 | 0.267859 | 0.888 |
| TMEM168  | -0.62 | 0.267858 | 0.888 |
| TMEM255A | -0.62 | 0.267858 | 0.888 |
| TNS3     | -0.62 | 0.267859 | 0.888 |
| TPO      | -0.62 | 0.267859 | 0.888 |
| UBXN7    | -0.62 | 0.267858 | 0.888 |
| USP17L13 | -0.62 | 0.267859 | 0.888 |
| XPO1     | -0.62 | 0.386266 | 0.923 |
| ZNF526   | -0.62 | 0.320042 | 0.906 |
| ZWINT    | -0.62 | 0.292508 | 0.898 |
| ACBD6    | -0.61 | 0.275417 | 0.888 |
| ADIPOQ   | -0.61 | 0.275417 | 0.888 |
| AK1      | -0.61 | 0.300139 | 0.9   |
| AMER1    | -0.61 | 0.275417 | 0.888 |
| AP2A2    | -0.61 | 0.275417 | 0.888 |
| ARNTL2   | -0.61 | 0.275417 | 0.888 |
| BARD1    | -0.61 | 0.327637 | 0.908 |
| C19orf25 | -0.61 | 0.275417 | 0.888 |
| C19orf54 | -0.61 | 0.300139 | 0.9   |

|          |       |          |       |
|----------|-------|----------|-------|
| C1orf137 | -0.61 | 0.275417 | 0.888 |
| C1QA     | -0.61 | 0.275417 | 0.888 |
| C3orf56  | -0.61 | 0.275418 | 0.888 |
| C4orf22  | -0.61 | 0.300138 | 0.9   |
| CACYBP   | -0.61 | 0.275417 | 0.888 |
| CCDC138  | -0.61 | 0.275417 | 0.888 |
| CDK5RAP3 | -0.61 | 0.275417 | 0.888 |
| CHDC2    | -0.61 | 0.275417 | 0.888 |
| CLEC9A   | -0.61 | 0.275418 | 0.888 |
| CNTN5    | -0.61 | 0.275417 | 0.888 |
| CPO      | -0.61 | 0.275418 | 0.888 |
| CUBN     | -0.61 | 0.275417 | 0.888 |
| CXCL3    | -0.61 | 0.275418 | 0.888 |
| DAPK2    | -0.61 | 0.300138 | 0.9   |
| DNMBP    | -0.61 | 0.275417 | 0.888 |
| ECD      | -0.61 | 0.327637 | 0.908 |
| EEF1A2   | -0.61 | 0.275417 | 0.888 |
| EXOSC8   | -0.61 | 0.300138 | 0.9   |
| FAF1     | -0.61 | 0.275417 | 0.888 |
| FAM156A  | -0.61 | 0.275417 | 0.888 |
| FAM156B  | -0.61 | 0.275417 | 0.888 |
| FAM174A  | -0.61 | 0.275417 | 0.888 |
| GDA      | -0.61 | 0.275417 | 0.888 |
| GPRIN3   | -0.61 | 0.275417 | 0.888 |
| HABP2    | -0.61 | 0.275417 | 0.888 |
| ITPRIPL2 | -0.61 | 0.275417 | 0.888 |
| KIAA1024 | -0.61 | 0.275417 | 0.888 |
| KLHDC2   | -0.61 | 0.275418 | 0.888 |
| LIFR     | -0.61 | 0.275417 | 0.888 |
| LRRK2    | -0.61 | 0.275417 | 0.888 |
| MAGEL2   | -0.61 | 0.275417 | 0.888 |
| MBNL1    | -0.61 | 0.275417 | 0.888 |
| MGMT     | -0.61 | 0.275417 | 0.888 |
| MPV17L   | -0.61 | 0.275417 | 0.888 |
| MYBPC2   | -0.61 | 0.275417 | 0.888 |
| NACAD    | -0.61 | 0.275418 | 0.888 |
| NAT1     | -0.61 | 0.275417 | 0.888 |
| NIPSNAP1 | -0.61 | 0.275417 | 0.888 |
| NR6A1    | -0.61 | 0.275417 | 0.888 |
| NUAK2    | -0.61 | 0.275417 | 0.888 |
| ODF2L    | -0.61 | 0.300138 | 0.9   |
| OR2A4    | -0.61 | 0.275418 | 0.888 |
| OR2G3    | -0.61 | 0.275417 | 0.888 |
| OR5R1    | -0.61 | 0.275417 | 0.888 |
| OR5T2    | -0.61 | 0.275417 | 0.888 |
| ORM2     | -0.61 | 0.275417 | 0.888 |
| P2RY10   | -0.61 | 0.275417 | 0.888 |

|           |       |          |       |
|-----------|-------|----------|-------|
| PAPOLA    | -0.61 | 0.275418 | 0.888 |
| PATL2     | -0.61 | 0.300139 | 0.9   |
| PDGFA     | -0.61 | 0.275417 | 0.888 |
| PLXNA2    | -0.61 | 0.275417 | 0.888 |
| PRAMEF20  | -0.61 | 0.275417 | 0.888 |
| PRPF39    | -0.61 | 0.300139 | 0.9   |
| RIBC2     | -0.61 | 0.275418 | 0.888 |
| RTN4R     | -0.61 | 0.300139 | 0.9   |
| SET       | -0.61 | 0.275417 | 0.888 |
| SETD1A    | -0.61 | 0.300139 | 0.9   |
| SLC16A5   | -0.61 | 0.275417 | 0.888 |
| SMN1      | -0.61 | 0.275417 | 0.888 |
| SMN2      | -0.61 | 0.275417 | 0.888 |
| SNCA      | -0.61 | 0.275418 | 0.888 |
| SPERT     | -0.61 | 0.275418 | 0.888 |
| STAC3     | -0.61 | 0.275418 | 0.888 |
| STRN4     | -0.61 | 0.275417 | 0.888 |
| SYNPO2    | -0.61 | 0.275417 | 0.888 |
| THUMPD1   | -0.61 | 0.275417 | 0.888 |
| TMEM199   | -0.61 | 0.275417 | 0.888 |
| TNFRSF4   | -0.61 | 0.275417 | 0.888 |
| VAX2      | -0.61 | 0.275417 | 0.888 |
| VWC2L     | -0.61 | 0.275417 | 0.888 |
| ZBP1      | -0.61 | 0.300138 | 0.9   |
| ABCA12    | -0.6  | 0.283207 | 0.891 |
| ACOT8     | -0.6  | 0.283207 | 0.891 |
| ARIH2     | -0.6  | 0.283207 | 0.891 |
| ARSF      | -0.6  | 0.283207 | 0.891 |
| B3GALT5   | -0.6  | 0.283207 | 0.891 |
| BAIAP2    | -0.6  | 0.283208 | 0.891 |
| BNIP3L    | -0.6  | 0.283208 | 0.891 |
| BTC       | -0.6  | 0.30792  | 0.9   |
| C2orf69   | -0.6  | 0.283207 | 0.891 |
| CD244     | -0.6  | 0.283208 | 0.891 |
| CEP85L    | -0.6  | 0.30792  | 0.9   |
| CERS6     | -0.6  | 0.283208 | 0.891 |
| CHDH      | -0.6  | 0.283207 | 0.891 |
| COLQ      | -0.6  | 0.283207 | 0.891 |
| CXorf40A  | -0.6  | 0.283207 | 0.891 |
| DGKG      | -0.6  | 0.283207 | 0.891 |
| DHR SX    | -0.6  | 0.283208 | 0.891 |
| DOC2A     | -0.6  | 0.283208 | 0.891 |
| ECI1      | -0.6  | 0.283207 | 0.891 |
| EMID1     | -0.6  | 0.283207 | 0.891 |
| EVC2      | -0.6  | 0.283208 | 0.891 |
| EXD1      | -0.6  | 0.283208 | 0.891 |
| FAM120AOS | -0.6  | 0.283207 | 0.891 |

|           |      |          |       |
|-----------|------|----------|-------|
| FAM209B   | -0.6 | 0.283208 | 0.891 |
| FGF9      | -0.6 | 0.283208 | 0.891 |
| FRK       | -0.6 | 0.283207 | 0.891 |
| GLT8D1    | -0.6 | 0.283208 | 0.891 |
| GMPPA     | -0.6 | 0.30792  | 0.9   |
| GUSB      | -0.6 | 0.283208 | 0.891 |
| IGJ       | -0.6 | 0.283208 | 0.891 |
| IGSF9B    | -0.6 | 0.283207 | 0.891 |
| ITGAE     | -0.6 | 0.283208 | 0.891 |
| KCNK15    | -0.6 | 0.30792  | 0.9   |
| KCNMB2    | -0.6 | 0.283208 | 0.891 |
| KPNA4     | -0.6 | 0.283207 | 0.891 |
| KRTAP10-2 | -0.6 | 0.30792  | 0.9   |
| LAMP2     | -0.6 | 0.283207 | 0.891 |
| LGI2      | -0.6 | 0.283207 | 0.891 |
| LY6D      | -0.6 | 0.283207 | 0.891 |
| MFS7      | -0.6 | 0.283207 | 0.891 |
| MRPL51    | -0.6 | 0.30792  | 0.9   |
| MSANTD2   | -0.6 | 0.283207 | 0.891 |
| MTNR1B    | -0.6 | 0.30792  | 0.9   |
| MUCL1     | -0.6 | 0.283208 | 0.891 |
| MZB1      | -0.6 | 0.30792  | 0.9   |
| NEMF      | -0.6 | 0.30792  | 0.9   |
| NFASC     | -0.6 | 0.283207 | 0.891 |
| NPHP4     | -0.6 | 0.307919 | 0.9   |
| OR2T35    | -0.6 | 0.283208 | 0.891 |
| ORAI2     | -0.6 | 0.283207 | 0.891 |
| ORMDL2    | -0.6 | 0.283208 | 0.891 |
| PAH       | -0.6 | 0.283207 | 0.891 |
| PCDHB6    | -0.6 | 0.307919 | 0.9   |
| PCF11     | -0.6 | 0.30792  | 0.9   |
| PENK      | -0.6 | 0.30792  | 0.9   |
| PHLDA1    | -0.6 | 0.283207 | 0.891 |
| PNKD      | -0.6 | 0.283207 | 0.891 |
| RBM25     | -0.6 | 0.307919 | 0.9   |
| RBM28     | -0.6 | 0.283207 | 0.891 |
| RGN       | -0.6 | 0.283207 | 0.891 |
| RPL37     | -0.6 | 0.401317 | 0.923 |
| S100Z     | -0.6 | 0.283207 | 0.891 |
| SHC1      | -0.6 | 0.283208 | 0.891 |
| SLC1A2    | -0.6 | 0.283207 | 0.891 |
| SLC26A9   | -0.6 | 0.283208 | 0.891 |
| SLC35E4   | -0.6 | 0.283207 | 0.891 |
| SOX8      | -0.6 | 0.283208 | 0.891 |
| SPRY2     | -0.6 | 0.30792  | 0.9   |
| TMEM9B    | -0.6 | 0.283207 | 0.891 |
| TNFRSF10A | -0.6 | 0.283207 | 0.891 |

|          |       |          |       |
|----------|-------|----------|-------|
| TNMD     | -0.6  | 0.283207 | 0.891 |
| TPM2     | -0.6  | 0.30792  | 0.9   |
| TRMT11   | -0.6  | 0.283208 | 0.891 |
| TSNARE1  | -0.6  | 0.283208 | 0.891 |
| XCR1     | -0.6  | 0.283207 | 0.891 |
| ZNF124   | -0.6  | 0.283207 | 0.891 |
| ZNF502   | -0.6  | 0.283208 | 0.891 |
| ZNF679   | -0.6  | 0.283207 | 0.891 |
| ZNF816   | -0.6  | 0.283208 | 0.891 |
| ABCD1    | -0.59 | 0.291109 | 0.896 |
| ANKRD1   | -0.59 | 0.291109 | 0.896 |
| ARHGAP17 | -0.59 | 0.291109 | 0.896 |
| ASB6     | -0.59 | 0.291109 | 0.896 |
| BAZ1A    | -0.59 | 0.291109 | 0.896 |
| C17orf74 | -0.59 | 0.291109 | 0.896 |
| C5orf34  | -0.59 | 0.291109 | 0.896 |
| C5orf54  | -0.59 | 0.315792 | 0.903 |
| CAV3     | -0.59 | 0.291109 | 0.896 |
| CCR9     | -0.59 | 0.315792 | 0.903 |
| CDR2L    | -0.59 | 0.291109 | 0.896 |
| CYTH4    | -0.59 | 0.315793 | 0.903 |
| DBP      | -0.59 | 0.291109 | 0.896 |
| DPH6     | -0.59 | 0.291109 | 0.896 |
| EML6     | -0.59 | 0.291109 | 0.896 |
| ESRRG    | -0.59 | 0.315792 | 0.903 |
| FAM131B  | -0.59 | 0.291109 | 0.896 |
| FBP1     | -0.59 | 0.291109 | 0.896 |
| FGF14    | -0.59 | 0.291109 | 0.896 |
| FKRP     | -0.59 | 0.291109 | 0.896 |
| FOXP1    | -0.59 | 0.291109 | 0.896 |
| FOXR2    | -0.59 | 0.291109 | 0.896 |
| FPR2     | -0.59 | 0.315792 | 0.903 |
| FUT7     | -0.59 | 0.291109 | 0.896 |
| GALR1    | -0.59 | 0.343347 | 0.911 |
| GJB6     | -0.59 | 0.291109 | 0.896 |
| HAUS2    | -0.59 | 0.315792 | 0.903 |
| HIBCH    | -0.59 | 0.291109 | 0.896 |
| HIST3H3  | -0.59 | 0.291109 | 0.896 |
| HOXA3    | -0.59 | 0.291109 | 0.896 |
| IL22     | -0.59 | 0.291109 | 0.896 |
| JPH3     | -0.59 | 0.291109 | 0.896 |
| KCNJ6    | -0.59 | 0.291109 | 0.896 |
| KIAA0586 | -0.59 | 0.291109 | 0.896 |
| KIAA1644 | -0.59 | 0.291109 | 0.896 |
| KIAA2026 | -0.59 | 0.291109 | 0.896 |
| KLHDC7A  | -0.59 | 0.315792 | 0.903 |
| KLHL12   | -0.59 | 0.291109 | 0.896 |

|            |       |          |       |
|------------|-------|----------|-------|
| L3MBTL1    | -0.59 | 0.315793 | 0.903 |
| LOC1053757 | -0.59 | 0.315792 | 0.903 |
| LOXHD1     | -0.59 | 0.291109 | 0.896 |
| MS4A7      | -0.59 | 0.291109 | 0.896 |
| MTNR1A     | -0.59 | 0.291109 | 0.896 |
| NDUFS6     | -0.59 | 0.291109 | 0.896 |
| OR4D11     | -0.59 | 0.291109 | 0.896 |
| PDE3B      | -0.59 | 0.291109 | 0.896 |
| PDZD2      | -0.59 | 0.315792 | 0.903 |
| PER1       | -0.59 | 0.343347 | 0.911 |
| PI16       | -0.59 | 0.291109 | 0.896 |
| PRDM12     | -0.59 | 0.291109 | 0.896 |
| PRMT8      | -0.59 | 0.291109 | 0.896 |
| PSMD10     | -0.59 | 0.291109 | 0.896 |
| PTPRD      | -0.59 | 0.291109 | 0.896 |
| PXMP4      | -0.59 | 0.291109 | 0.896 |
| PYGL       | -0.59 | 0.291109 | 0.896 |
| REP15      | -0.59 | 0.291109 | 0.896 |
| RPL4       | -0.59 | 0.291109 | 0.896 |
| RRP1       | -0.59 | 0.291109 | 0.896 |
| SCAND1     | -0.59 | 0.291109 | 0.896 |
| SEPT6      | -0.59 | 0.291109 | 0.896 |
| SLC26A5    | -0.59 | 0.291109 | 0.896 |
| STAP2      | -0.59 | 0.291109 | 0.896 |
| STX2       | -0.59 | 0.315792 | 0.903 |
| TSR3       | -0.59 | 0.291109 | 0.896 |
| UBE2O      | -0.59 | 0.291109 | 0.896 |
| UBXN6      | -0.59 | 0.291109 | 0.896 |
| UFSP2      | -0.59 | 0.291109 | 0.896 |
| VAT1L      | -0.59 | 0.315793 | 0.903 |
| YEATS2     | -0.59 | 0.315792 | 0.903 |
| ZNF408     | -0.59 | 0.291109 | 0.896 |
| ZNF497     | -0.59 | 0.291109 | 0.896 |
| AK8        | -0.58 | 0.323807 | 0.906 |
| ANXA10     | -0.58 | 0.299105 | 0.9   |
| AP1S2      | -0.58 | 0.299105 | 0.9   |
| ARL11      | -0.58 | 0.299106 | 0.9   |
| BATF3      | -0.58 | 0.299105 | 0.9   |
| BCL7B      | -0.58 | 0.299105 | 0.9   |
| C14orf2    | -0.58 | 0.299105 | 0.9   |
| C16orf54   | -0.58 | 0.299105 | 0.9   |
| C3orf36    | -0.58 | 0.38201  | 0.923 |
| CD300E     | -0.58 | 0.323807 | 0.906 |
| CDC23      | -0.58 | 0.323807 | 0.906 |
| CERK       | -0.58 | 0.323807 | 0.906 |
| CHRNA10    | -0.58 | 0.299105 | 0.9   |
| CMTM5      | -0.58 | 0.299105 | 0.9   |

|         |       |          |       |
|---------|-------|----------|-------|
| CST2    | -0.58 | 0.299105 | 0.9   |
| DLG4    | -0.58 | 0.299105 | 0.9   |
| ENY2    | -0.58 | 0.323807 | 0.906 |
| EPHA4   | -0.58 | 0.299105 | 0.9   |
| FBF1    | -0.58 | 0.299105 | 0.9   |
| FRMPD4  | -0.58 | 0.299106 | 0.9   |
| GPN2    | -0.58 | 0.323807 | 0.906 |
| GSTM4   | -0.58 | 0.323807 | 0.906 |
| IMPA1   | -0.58 | 0.299106 | 0.9   |
| ITGA1   | -0.58 | 0.299105 | 0.9   |
| KIF27   | -0.58 | 0.299105 | 0.9   |
| KIF4A   | -0.58 | 0.299106 | 0.9   |
| LETM2   | -0.58 | 0.299106 | 0.9   |
| LRRC28  | -0.58 | 0.299105 | 0.9   |
| LRRC61  | -0.58 | 0.299106 | 0.9   |
| LYST    | -0.58 | 0.299105 | 0.9   |
| MCM7    | -0.58 | 0.351374 | 0.913 |
| MCM9    | -0.58 | 0.299106 | 0.9   |
| MGAT4B  | -0.58 | 0.299105 | 0.9   |
| MMP2    | -0.58 | 0.299105 | 0.9   |
| MSH2    | -0.58 | 0.299105 | 0.9   |
| NAV1    | -0.58 | 0.299105 | 0.9   |
| NETO2   | -0.58 | 0.299106 | 0.9   |
| NPEPPS  | -0.58 | 0.299105 | 0.9   |
| NR4A3   | -0.58 | 0.299105 | 0.9   |
| NSMCE4A | -0.58 | 0.323807 | 0.906 |
| NSRP1   | -0.58 | 0.299105 | 0.9   |
| NTM     | -0.58 | 0.299105 | 0.9   |
| OR51A4  | -0.58 | 0.299105 | 0.9   |
| OR5AC2  | -0.58 | 0.299105 | 0.9   |
| OXCT1   | -0.58 | 0.299105 | 0.9   |
| RAD51D  | -0.58 | 0.299106 | 0.9   |
| RBM24   | -0.58 | 0.323807 | 0.906 |
| RBMXL1  | -0.58 | 0.299106 | 0.9   |
| RICTOR  | -0.58 | 0.299106 | 0.9   |
| RLTPR   | -0.58 | 0.299105 | 0.9   |
| RNF135  | -0.58 | 0.299105 | 0.9   |
| SGCZ    | -0.58 | 0.299105 | 0.9   |
| SHROOM4 | -0.58 | 0.323807 | 0.906 |
| SLC46A1 | -0.58 | 0.323807 | 0.906 |
| SSU72   | -0.58 | 0.299106 | 0.9   |
| STK32A  | -0.58 | 0.299105 | 0.9   |
| TPD52L1 | -0.58 | 0.299105 | 0.9   |
| TSTD2   | -0.58 | 0.323807 | 0.906 |
| TTC7A   | -0.58 | 0.323807 | 0.906 |
| UCKL1   | -0.58 | 0.299106 | 0.9   |
| USP3    | -0.58 | 0.299106 | 0.9   |

|          |       |          |       |
|----------|-------|----------|-------|
| VDAC3    | -0.58 | 0.299105 | 0.9   |
| ZIM2     | -0.58 | 0.323807 | 0.906 |
| ZNF141   | -0.58 | 0.299105 | 0.9   |
| ZNF473   | -0.58 | 0.299105 | 0.9   |
| ZNF688   | -0.58 | 0.323807 | 0.906 |
| ZSCAN16  | -0.58 | 0.299105 | 0.9   |
| AASDH    | -0.57 | 0.307297 | 0.9   |
| ACLY     | -0.57 | 0.307297 | 0.9   |
| ADAMTSL2 | -0.57 | 0.307298 | 0.9   |
| AGK      | -0.57 | 0.307297 | 0.9   |
| APEH     | -0.57 | 0.331925 | 0.908 |
| APOC4    | -0.57 | 0.307297 | 0.9   |
| B3GNT7   | -0.57 | 0.331924 | 0.908 |
| BEGAIN   | -0.57 | 0.307297 | 0.9   |
| C20orf24 | -0.57 | 0.307297 | 0.9   |
| CASP1    | -0.57 | 0.307297 | 0.9   |
| CCDC101  | -0.57 | 0.307297 | 0.9   |
| CDH24    | -0.57 | 0.331924 | 0.908 |
| CENPC    | -0.57 | 0.307297 | 0.9   |
| CMTM6    | -0.57 | 0.307298 | 0.9   |
| CORO1C   | -0.57 | 0.307297 | 0.9   |
| CPQ      | -0.57 | 0.307297 | 0.9   |
| CTRL     | -0.57 | 0.307297 | 0.9   |
| DPM1     | -0.57 | 0.307297 | 0.9   |
| DPYSL4   | -0.57 | 0.307297 | 0.9   |
| DUSP22   | -0.57 | 0.331925 | 0.908 |
| ECE1     | -0.57 | 0.307297 | 0.9   |
| EFCAB6   | -0.57 | 0.307297 | 0.9   |
| EIF4G2   | -0.57 | 0.307297 | 0.9   |
| FAM71B   | -0.57 | 0.307297 | 0.9   |
| GBP1     | -0.57 | 0.307297 | 0.9   |
| GDPGP1   | -0.57 | 0.307297 | 0.9   |
| GJC1     | -0.57 | 0.307297 | 0.9   |
| GPLD1    | -0.57 | 0.307297 | 0.9   |
| HGS      | -0.57 | 0.307297 | 0.9   |
| HMGB1    | -0.57 | 0.307298 | 0.9   |
| IFNA4    | -0.57 | 0.307297 | 0.9   |
| IPO11    | -0.57 | 0.307297 | 0.9   |
| IQGAP3   | -0.57 | 0.307297 | 0.9   |
| KCNMB3   | -0.57 | 0.307297 | 0.9   |
| KCNV1    | -0.57 | 0.307297 | 0.9   |
| LHPP     | -0.57 | 0.307297 | 0.9   |
| LILRA2   | -0.57 | 0.307297 | 0.9   |
| LONP2    | -0.57 | 0.307297 | 0.9   |
| MAGI1    | -0.57 | 0.307297 | 0.9   |
| MKNK1    | -0.57 | 0.35947  | 0.915 |
| MLLT11   | -0.57 | 0.307297 | 0.9   |

|           |       |          |       |
|-----------|-------|----------|-------|
| MPDU1     | -0.57 | 0.307298 | 0.9   |
| NCAPG2    | -0.57 | 0.331924 | 0.908 |
| NCR1      | -0.57 | 0.307298 | 0.9   |
| NDUFB6    | -0.57 | 0.307297 | 0.9   |
| NFKB2     | -0.57 | 0.331924 | 0.908 |
| NOL7      | -0.57 | 0.331925 | 0.908 |
| NOTCH3    | -0.57 | 0.331924 | 0.908 |
| NUDT16    | -0.57 | 0.307297 | 0.9   |
| NXNL2     | -0.57 | 0.307298 | 0.9   |
| ODF2      | -0.57 | 0.307297 | 0.9   |
| OR10P1    | -0.57 | 0.307297 | 0.9   |
| OR8D1     | -0.57 | 0.307297 | 0.9   |
| PAPSS2    | -0.57 | 0.307298 | 0.9   |
| PCGF3     | -0.57 | 0.307297 | 0.9   |
| PLAC1L    | -0.57 | 0.307298 | 0.9   |
| POLQ      | -0.57 | 0.307298 | 0.9   |
| PPP1R13L  | -0.57 | 0.307297 | 0.9   |
| PRADC1    | -0.57 | 0.307298 | 0.9   |
| PTPN7     | -0.57 | 0.307298 | 0.9   |
| RAD23A    | -0.57 | 0.307297 | 0.9   |
| RASA4B    | -0.57 | 0.307297 | 0.9   |
| RGAG1     | -0.57 | 0.307297 | 0.9   |
| ROPN1B    | -0.57 | 0.307297 | 0.9   |
| RPL19     | -0.57 | 0.331924 | 0.908 |
| RTDR1     | -0.57 | 0.331924 | 0.908 |
| SIRPB2    | -0.57 | 0.307297 | 0.9   |
| SKP1      | -0.57 | 0.307297 | 0.9   |
| SLC17A8   | -0.57 | 0.307297 | 0.9   |
| SLC22A5   | -0.57 | 0.307298 | 0.9   |
| SLC25A2   | -0.57 | 0.307297 | 0.9   |
| SLC28A3   | -0.57 | 0.307297 | 0.9   |
| SNRPF     | -0.57 | 0.424524 | 0.931 |
| SP100     | -0.57 | 0.307297 | 0.9   |
| SPO11     | -0.57 | 0.307298 | 0.9   |
| SPSB2     | -0.57 | 0.307297 | 0.9   |
| SYT7      | -0.57 | 0.307297 | 0.9   |
| THBS2     | -0.57 | 0.307297 | 0.9   |
| TNFAIP8L1 | -0.57 | 0.307297 | 0.9   |
| TNN       | -0.57 | 0.35947  | 0.915 |
| TUBB3     | -0.57 | 0.35947  | 0.915 |
| UBE2V2    | -0.57 | 0.307298 | 0.9   |
| UST       | -0.57 | 0.307297 | 0.9   |
| YLPM1     | -0.57 | 0.35947  | 0.915 |
| APOBEC4   | -0.56 | 0.315668 | 0.903 |
| B3GNTL1   | -0.56 | 0.315668 | 0.903 |
| BMP2K     | -0.56 | 0.315667 | 0.903 |
| BTG1      | -0.56 | 0.315667 | 0.903 |

|           |       |          |       |
|-----------|-------|----------|-------|
| C11orf1   | -0.56 | 0.315668 | 0.903 |
| C19orf24  | -0.56 | 0.315667 | 0.903 |
| C20orf194 | -0.56 | 0.315667 | 0.903 |
| CAPNS1    | -0.56 | 0.315668 | 0.903 |
| CHPF2     | -0.56 | 0.367728 | 0.919 |
| CRYGA     | -0.56 | 0.315668 | 0.903 |
| CYP3A7    | -0.56 | 0.315668 | 0.903 |
| DCLK3     | -0.56 | 0.315668 | 0.903 |
| DEFB105A  | -0.56 | 0.315668 | 0.903 |
| DEFB105B  | -0.56 | 0.315668 | 0.903 |
| EFCAB1    | -0.56 | 0.315668 | 0.903 |
| EFR3A     | -0.56 | 0.34017  | 0.908 |
| EMC6      | -0.56 | 0.315668 | 0.903 |
| GLTSCR2   | -0.56 | 0.367728 | 0.919 |
| GRIK5     | -0.56 | 0.315668 | 0.903 |
| GSN       | -0.56 | 0.34017  | 0.908 |
| HES6      | -0.56 | 0.315668 | 0.903 |
| HNRNPR    | -0.56 | 0.315668 | 0.903 |
| ITM2B     | -0.56 | 0.315668 | 0.903 |
| JAKMIP3   | -0.56 | 0.34017  | 0.908 |
| KCNC4     | -0.56 | 0.34017  | 0.908 |
| KCNH8     | -0.56 | 0.34017  | 0.908 |
| KIAA0319L | -0.56 | 0.34017  | 0.908 |
| KIF16B    | -0.56 | 0.315668 | 0.903 |
| LEO1      | -0.56 | 0.315668 | 0.903 |
| LMTK3     | -0.56 | 0.367728 | 0.919 |
| LOC389199 | -0.56 | 0.315668 | 0.903 |
| LPPR4     | -0.56 | 0.315668 | 0.903 |
| LTN1      | -0.56 | 0.315667 | 0.903 |
| LYNX1     | -0.56 | 0.315668 | 0.903 |
| LZTS2     | -0.56 | 0.315667 | 0.903 |
| MANBA     | -0.56 | 0.315668 | 0.903 |
| MDH2      | -0.56 | 0.315668 | 0.903 |
| METTL3    | -0.56 | 0.315668 | 0.903 |
| MFSD11    | -0.56 | 0.315668 | 0.903 |
| MORF4L2   | -0.56 | 0.315668 | 0.903 |
| NINL      | -0.56 | 0.315668 | 0.903 |
| OR1J4     | -0.56 | 0.34017  | 0.908 |
| OR52B6    | -0.56 | 0.315668 | 0.903 |
| PDP2      | -0.56 | 0.315668 | 0.903 |
| PFDN1     | -0.56 | 0.315668 | 0.903 |
| PIGA      | -0.56 | 0.315668 | 0.903 |
| PPFIA4    | -0.56 | 0.34017  | 0.908 |
| PRAM1     | -0.56 | 0.315667 | 0.903 |
| PRR36     | -0.56 | 0.315668 | 0.903 |
| R3HDM2    | -0.56 | 0.315668 | 0.903 |
| RBM17     | -0.56 | 0.315667 | 0.903 |

|           |       |          |       |
|-----------|-------|----------|-------|
| ROGDI     | -0.56 | 0.34017  | 0.908 |
| SHISA8    | -0.56 | 0.315668 | 0.903 |
| SIRT6     | -0.56 | 0.367728 | 0.919 |
| SPATA31A1 | -0.56 | 0.315668 | 0.903 |
| SPEF1     | -0.56 | 0.315667 | 0.903 |
| ST3GAL2   | -0.56 | 0.315668 | 0.903 |
| TAS2R13   | -0.56 | 0.34017  | 0.908 |
| TNFAIP3   | -0.56 | 0.315668 | 0.903 |
| TTLL13    | -0.56 | 0.315667 | 0.903 |
| UBLCP1    | -0.56 | 0.315668 | 0.903 |
| UBR1      | -0.56 | 0.315668 | 0.903 |
| ZNF438    | -0.56 | 0.315668 | 0.903 |
| ZNF735    | -0.56 | 0.315667 | 0.903 |
| ZNF774    | -0.56 | 0.315668 | 0.903 |
| ZSCAN5B   | -0.56 | 0.315667 | 0.903 |
| ACBD3     | -0.55 | 0.348646 | 0.911 |
| ANXA2     | -0.55 | 0.324171 | 0.906 |
| ATP13A3   | -0.55 | 0.324172 | 0.906 |
| BPNT1     | -0.55 | 0.324171 | 0.906 |
| C6orf223  | -0.55 | 0.324172 | 0.906 |
| CAMTA2    | -0.55 | 0.348646 | 0.911 |
| CCDC37    | -0.55 | 0.324171 | 0.906 |
| CHPF      | -0.55 | 0.348646 | 0.911 |
| CMSS1     | -0.55 | 0.324172 | 0.906 |
| COL4A5    | -0.55 | 0.324171 | 0.906 |
| CRYBA2    | -0.55 | 0.324171 | 0.906 |
| DACT3     | -0.55 | 0.324171 | 0.906 |
| DBX2      | -0.55 | 0.324171 | 0.906 |
| DDO       | -0.55 | 0.324171 | 0.906 |
| DOK7      | -0.55 | 0.324171 | 0.906 |
| ELFN1     | -0.55 | 0.324172 | 0.906 |
| ERBB4     | -0.55 | 0.324171 | 0.906 |
| FANCA     | -0.55 | 0.324171 | 0.906 |
| FNIP1     | -0.55 | 0.324172 | 0.906 |
| FOXJ3     | -0.55 | 0.324171 | 0.906 |
| GABARAP   | -0.55 | 0.324171 | 0.906 |
| GBP4      | -0.55 | 0.324171 | 0.906 |
| GGN       | -0.55 | 0.324172 | 0.906 |
| HBP1      | -0.55 | 0.324171 | 0.906 |
| HSPB11    | -0.55 | 0.348646 | 0.911 |
| KIAA1377  | -0.55 | 0.324171 | 0.906 |
| KLHDC8A   | -0.55 | 0.376107 | 0.923 |
| LOC391322 | -0.55 | 0.5239   | 0.949 |
| METTL8    | -0.55 | 0.376107 | 0.923 |
| MILR1     | -0.55 | 0.324171 | 0.906 |
| MYCL      | -0.55 | 0.324171 | 0.906 |
| MYH4      | -0.55 | 0.376107 | 0.923 |

|          |       |          |       |
|----------|-------|----------|-------|
| NFYC     | -0.55 | 0.324172 | 0.906 |
| NME7     | -0.55 | 0.324172 | 0.906 |
| NR5A2    | -0.55 | 0.324171 | 0.906 |
| PDHA1    | -0.55 | 0.324172 | 0.906 |
| PELI3    | -0.55 | 0.324171 | 0.906 |
| PHLPP1   | -0.55 | 0.324171 | 0.906 |
| PISD     | -0.55 | 0.324171 | 0.906 |
| PITPNM3  | -0.55 | 0.324171 | 0.906 |
| PLCXD2   | -0.55 | 0.324172 | 0.906 |
| PPP2R5B  | -0.55 | 0.348646 | 0.911 |
| PRSS38   | -0.55 | 0.324171 | 0.906 |
| PSMB11   | -0.55 | 0.324172 | 0.906 |
| RAMP1    | -0.55 | 0.324171 | 0.906 |
| RANBP10  | -0.55 | 0.324171 | 0.906 |
| RMND5B   | -0.55 | 0.376107 | 0.923 |
| ROR2     | -0.55 | 0.348645 | 0.911 |
| RP1L1    | -0.55 | 0.324172 | 0.906 |
| SETD3    | -0.55 | 0.324172 | 0.906 |
| SGCE     | -0.55 | 0.324171 | 0.906 |
| SH2D6    | -0.55 | 0.324171 | 0.906 |
| SLC9A3   | -0.55 | 0.324171 | 0.906 |
| SMIM18   | -0.55 | 0.324171 | 0.906 |
| SRMS     | -0.55 | 0.324171 | 0.906 |
| SRP9     | -0.55 | 0.348646 | 0.911 |
| TDRD3    | -0.55 | 0.324172 | 0.906 |
| TEK      | -0.55 | 0.324172 | 0.906 |
| TMEM184A | -0.55 | 0.324171 | 0.906 |
| TMEM211  | -0.55 | 0.324172 | 0.906 |
| TMEM237  | -0.55 | 0.324171 | 0.906 |
| VPS36    | -0.55 | 0.324171 | 0.906 |
| ZNF521   | -0.55 | 0.324171 | 0.906 |
| ZNF696   | -0.55 | 0.324172 | 0.906 |
| ZYG11B   | -0.55 | 0.324171 | 0.906 |
| ABCB6    | -0.54 | 0.332839 | 0.908 |
| ABCD2    | -0.54 | 0.332839 | 0.908 |
| ABTB2    | -0.54 | 0.332838 | 0.908 |
| ADCY8    | -0.54 | 0.357185 | 0.915 |
| AIM1     | -0.54 | 0.332838 | 0.908 |
| AMY1B    | -0.54 | 0.332839 | 0.908 |
| AMY1C    | -0.54 | 0.332839 | 0.908 |
| ATHL1    | -0.54 | 0.332838 | 0.908 |
| BRWD1    | -0.54 | 0.332838 | 0.908 |
| C3orf35  | -0.54 | 0.332839 | 0.908 |
| C7orf63  | -0.54 | 0.332839 | 0.908 |
| C9orf173 | -0.54 | 0.332838 | 0.908 |
| CACHD1   | -0.54 | 0.332839 | 0.908 |
| CAV2     | -0.54 | 0.384683 | 0.923 |

|           |       |          |       |
|-----------|-------|----------|-------|
| CDKN2AIP  | -0.54 | 0.332838 | 0.908 |
| CLDN18    | -0.54 | 0.332839 | 0.908 |
| CPSF7     | -0.54 | 0.332839 | 0.908 |
| CTNNB1    | -0.54 | 0.332838 | 0.908 |
| DDX19B    | -0.54 | 0.332839 | 0.908 |
| DEFB123   | -0.54 | 0.332839 | 0.908 |
| DSG2      | -0.54 | 0.332839 | 0.908 |
| EFCAB7    | -0.54 | 0.332838 | 0.908 |
| ELF5      | -0.54 | 0.332839 | 0.908 |
| ELMO2     | -0.54 | 0.332838 | 0.908 |
| EPB41L2   | -0.54 | 0.332839 | 0.908 |
| EPHA7     | -0.54 | 0.357185 | 0.915 |
| EPHB4     | -0.54 | 0.357186 | 0.915 |
| FAM72B    | -0.54 | 0.332839 | 0.908 |
| GCC2      | -0.54 | 0.332839 | 0.908 |
| GLRA2     | -0.54 | 0.332838 | 0.908 |
| GTF2A1L   | -0.54 | 0.332839 | 0.908 |
| HIST1H3F  | -0.54 | 0.332839 | 0.908 |
| HOXD10    | -0.54 | 0.357185 | 0.915 |
| IFT172    | -0.54 | 0.332839 | 0.908 |
| IGSF1     | -0.54 | 0.332839 | 0.908 |
| IL6R      | -0.54 | 0.332838 | 0.908 |
| LMNA      | -0.54 | 0.357185 | 0.915 |
| MBNL3     | -0.54 | 0.332839 | 0.908 |
| MED21     | -0.54 | 0.332838 | 0.908 |
| MKL1      | -0.54 | 0.357185 | 0.915 |
| MPHOSPH6  | -0.54 | 0.332839 | 0.908 |
| MRPL11    | -0.54 | 0.332839 | 0.908 |
| MSH4      | -0.54 | 0.332838 | 0.908 |
| NANS      | -0.54 | 0.332839 | 0.908 |
| NCS1      | -0.54 | 0.332839 | 0.908 |
| NME5      | -0.54 | 0.332839 | 0.908 |
| NOTUM     | -0.54 | 0.332838 | 0.908 |
| NUBP1     | -0.54 | 0.332839 | 0.908 |
| OTUB2     | -0.54 | 0.357185 | 0.915 |
| PEG10     | -0.54 | 0.332839 | 0.908 |
| PMF1-BGLA | -0.54 | 0.332839 | 0.908 |
| PNPLA6    | -0.54 | 0.357185 | 0.915 |
| POTEC     | -0.54 | 0.332839 | 0.908 |
| PPIL4     | -0.54 | 0.357186 | 0.915 |
| PTTG2     | -0.54 | 0.332839 | 0.908 |
| RBM11     | -0.54 | 0.332839 | 0.908 |
| RFC4      | -0.54 | 0.332839 | 0.908 |
| RGS3      | -0.54 | 0.332839 | 0.908 |
| RGS7BP    | -0.54 | 0.332839 | 0.908 |
| RNF31     | -0.54 | 0.332838 | 0.908 |
| RSPH6A    | -0.54 | 0.332839 | 0.908 |

|           |       |          |       |
|-----------|-------|----------|-------|
| RTCA      | -0.54 | 0.332839 | 0.908 |
| SEMA3B    | -0.54 | 0.332839 | 0.908 |
| SLC22A20  | -0.54 | 0.357185 | 0.915 |
| SNRPB     | -0.54 | 0.357185 | 0.915 |
| SPANXN5   | -0.54 | 0.332838 | 0.908 |
| SPTBN4    | -0.54 | 0.332839 | 0.908 |
| SRRM1     | -0.54 | 0.332839 | 0.908 |
| ST6GALNAC | -0.54 | 0.332839 | 0.908 |
| TCHP      | -0.54 | 0.384683 | 0.923 |
| TMEM138   | -0.54 | 0.332839 | 0.908 |
| TMEM17    | -0.54 | 0.332839 | 0.908 |
| TPI1      | -0.54 | 0.332839 | 0.908 |
| TTC7B     | -0.54 | 0.332839 | 0.908 |
| VASP      | -0.54 | 0.332839 | 0.908 |
| WASH1     | -0.54 | 0.384683 | 0.923 |
| WDR91     | -0.54 | 0.332838 | 0.908 |
| WFDC6     | -0.54 | 0.332839 | 0.908 |
| WIPF3     | -0.54 | 0.384683 | 0.923 |
| XRCC2     | -0.54 | 0.332838 | 0.908 |
| YIPF6     | -0.54 | 0.332839 | 0.908 |
| ZAR1L     | -0.54 | 0.332839 | 0.908 |
| ZNF333    | -0.54 | 0.332838 | 0.908 |
| ACTL6B    | -0.53 | 0.341654 | 0.908 |
| ALAS1     | -0.53 | 0.365907 | 0.919 |
| ALG10B    | -0.53 | 0.341654 | 0.908 |
| AMY1A     | -0.53 | 0.341654 | 0.908 |
| APOA2     | -0.53 | 0.341655 | 0.908 |
| APOBEC3G  | -0.53 | 0.341654 | 0.908 |
| ARMCX1    | -0.53 | 0.341654 | 0.908 |
| ARSG      | -0.53 | 0.341654 | 0.908 |
| ATP2B2    | -0.53 | 0.341654 | 0.908 |
| C10orf10  | -0.53 | 0.341654 | 0.908 |
| CAPG      | -0.53 | 0.341654 | 0.908 |
| CAPN9     | -0.53 | 0.341655 | 0.908 |
| CASC4     | -0.53 | 0.365906 | 0.919 |
| CASP9     | -0.53 | 0.341655 | 0.908 |
| CASQ2     | -0.53 | 0.341655 | 0.908 |
| CCNA2     | -0.53 | 0.393314 | 0.923 |
| CD99      | -0.53 | 0.341655 | 0.908 |
| CRYM      | -0.53 | 0.341654 | 0.908 |
| CTC1      | -0.53 | 0.365906 | 0.919 |
| CXXC4     | -0.53 | 0.341654 | 0.908 |
| DDB1      | -0.53 | 0.393315 | 0.923 |
| DDX24     | -0.53 | 0.341654 | 0.908 |
| DDX59     | -0.53 | 0.365906 | 0.919 |
| DISC1     | -0.53 | 0.341654 | 0.908 |
| DUT       | -0.53 | 0.341655 | 0.908 |

|           |       |          |       |
|-----------|-------|----------|-------|
| EPHX1     | -0.53 | 0.341655 | 0.908 |
| F13B      | -0.53 | 0.365906 | 0.919 |
| FAM104A   | -0.53 | 0.341654 | 0.908 |
| FASTKD3   | -0.53 | 0.341654 | 0.908 |
| FGFR2     | -0.53 | 0.341655 | 0.908 |
| FOXE1     | -0.53 | 0.341654 | 0.908 |
| GREM1     | -0.53 | 0.341654 | 0.908 |
| GZMB      | -0.53 | 0.341654 | 0.908 |
| HERPUD2   | -0.53 | 0.341654 | 0.908 |
| HIST1H2BA | -0.53 | 0.341654 | 0.908 |
| HIST3H2BB | -0.53 | 0.341654 | 0.908 |
| HOXB6     | -0.53 | 0.341654 | 0.908 |
| IFIT3     | -0.53 | 0.341654 | 0.908 |
| INHBE     | -0.53 | 0.341654 | 0.908 |
| IRS1      | -0.53 | 0.365906 | 0.919 |
| KRT13     | -0.53 | 0.341654 | 0.908 |
| LAMP3     | -0.53 | 0.341654 | 0.908 |
| LDB2      | -0.53 | 0.341655 | 0.908 |
| LILRA6    | -0.53 | 0.341654 | 0.908 |
| LIMK2     | -0.53 | 0.365907 | 0.919 |
| LRRC38    | -0.53 | 0.341654 | 0.908 |
| MAP1S     | -0.53 | 0.341654 | 0.908 |
| MAPRE1    | -0.53 | 0.341654 | 0.908 |
| MARCH1    | -0.53 | 0.341654 | 0.908 |
| MUC12     | -0.53 | 0.365906 | 0.919 |
| MYO16     | -0.53 | 0.341654 | 0.908 |
| NAPB      | -0.53 | 0.341654 | 0.908 |
| NFATC3    | -0.53 | 0.365906 | 0.919 |
| NKAIN4    | -0.53 | 0.341654 | 0.908 |
| PANK3     | -0.53 | 0.341655 | 0.908 |
| PCDHB13   | -0.53 | 0.341654 | 0.908 |
| PDK2      | -0.53 | 0.341654 | 0.908 |
| RAB30     | -0.53 | 0.341654 | 0.908 |
| RCBTB2    | -0.53 | 0.365906 | 0.919 |
| RFESD     | -0.53 | 0.341654 | 0.908 |
| RNF150    | -0.53 | 0.365907 | 0.919 |
| ROBO1     | -0.53 | 0.341654 | 0.908 |
| RRP15     | -0.53 | 0.341654 | 0.908 |
| SASH3     | -0.53 | 0.341654 | 0.908 |
| SELK      | -0.53 | 0.341654 | 0.908 |
| SFRP5     | -0.53 | 0.341654 | 0.908 |
| SGSM3     | -0.53 | 0.341654 | 0.908 |
| SHISA9    | -0.53 | 0.341654 | 0.908 |
| SLC10A2   | -0.53 | 0.341654 | 0.908 |
| SLC18A2   | -0.53 | 0.341655 | 0.908 |
| SLC22A7   | -0.53 | 0.341654 | 0.908 |
| SNTG2     | -0.53 | 0.341654 | 0.908 |

|          |       |          |       |
|----------|-------|----------|-------|
| SOWAHA   | -0.53 | 0.341655 | 0.908 |
| SP8      | -0.53 | 0.341654 | 0.908 |
| SPSB4    | -0.53 | 0.365906 | 0.919 |
| SRR      | -0.53 | 0.365906 | 0.919 |
| TAC3     | -0.53 | 0.365906 | 0.919 |
| TM6SF1   | -0.53 | 0.341654 | 0.908 |
| TMEM190  | -0.53 | 0.341654 | 0.908 |
| TRAPPC2  | -0.53 | 0.341655 | 0.908 |
| TREML2   | -0.53 | 0.341654 | 0.908 |
| TSSK3    | -0.53 | 0.341654 | 0.908 |
| TUSC1    | -0.53 | 0.341654 | 0.908 |
| UFC1     | -0.53 | 0.341654 | 0.908 |
| ULBP3    | -0.53 | 0.341654 | 0.908 |
| UMPS     | -0.53 | 0.456828 | 0.939 |
| UPP2     | -0.53 | 0.341655 | 0.908 |
| VIPR1    | -0.53 | 0.341655 | 0.908 |
| VSTM2A   | -0.53 | 0.341655 | 0.908 |
| WDFY2    | -0.53 | 0.341655 | 0.908 |
| ZEB1     | -0.53 | 0.341654 | 0.908 |
| ZNF566   | -0.53 | 0.341654 | 0.908 |
| ZNF610   | -0.53 | 0.341654 | 0.908 |
| ZSCAN31  | -0.53 | 0.341654 | 0.908 |
| ABL1     | -0.52 | 0.350572 | 0.911 |
| AP5B1    | -0.52 | 0.350572 | 0.911 |
| ARHGEF11 | -0.52 | 0.374796 | 0.923 |
| B3GALT2  | -0.52 | 0.350572 | 0.911 |
| C10orf2  | -0.52 | 0.374797 | 0.923 |
| C6orf132 | -0.52 | 0.374797 | 0.923 |
| C9orf16  | -0.52 | 0.374797 | 0.923 |
| CACFD1   | -0.52 | 0.350572 | 0.911 |
| CACNA1G  | -0.52 | 0.374796 | 0.923 |
| CAMK2A   | -0.52 | 0.350573 | 0.911 |
| CARD9    | -0.52 | 0.350573 | 0.911 |
| CCDC11   | -0.52 | 0.350572 | 0.911 |
| CCNYL1   | -0.52 | 0.374797 | 0.923 |
| CNPPD1   | -0.52 | 0.350572 | 0.911 |
| COL4A3BP | -0.52 | 0.350572 | 0.911 |
| CORT     | -0.52 | 0.350572 | 0.911 |
| CPSF2    | -0.52 | 0.401998 | 0.923 |
| CRYZL1   | -0.52 | 0.350572 | 0.911 |
| DEDD2    | -0.52 | 0.350572 | 0.911 |
| DGAT2L6  | -0.52 | 0.350572 | 0.911 |
| DOLK     | -0.52 | 0.374797 | 0.923 |
| ENO2     | -0.52 | 0.350572 | 0.911 |
| FAM162A  | -0.52 | 0.374797 | 0.923 |
| FAM180B  | -0.52 | 0.374796 | 0.923 |
| FAM193B  | -0.52 | 0.350572 | 0.911 |

|            |       |          |       |
|------------|-------|----------|-------|
| FJX1       | -0.52 | 0.350573 | 0.911 |
| GLTPD1     | -0.52 | 0.350572 | 0.911 |
| GUK1       | -0.52 | 0.401998 | 0.923 |
| HDAC11     | -0.52 | 0.374797 | 0.923 |
| HSD17B3    | -0.52 | 0.350572 | 0.911 |
| KCNAB2     | -0.52 | 0.350572 | 0.911 |
| KLK6       | -0.52 | 0.350572 | 0.911 |
| LENG8      | -0.52 | 0.374797 | 0.923 |
| LOC1001304 | -0.52 | 0.350573 | 0.911 |
| LRIG3      | -0.52 | 0.350573 | 0.911 |
| LSM11      | -0.52 | 0.350572 | 0.911 |
| MAN1A2     | -0.52 | 0.374797 | 0.923 |
| MITD1      | -0.52 | 0.350573 | 0.911 |
| MTAP       | -0.52 | 0.350573 | 0.911 |
| MXRA8      | -0.52 | 0.350572 | 0.911 |
| MYRFL      | -0.52 | 0.350572 | 0.911 |
| NOP9       | -0.52 | 0.374797 | 0.923 |
| NUP85      | -0.52 | 0.43198  | 0.931 |
| OR2A25     | -0.52 | 0.350572 | 0.911 |
| OR2J2      | -0.52 | 0.350572 | 0.911 |
| OR2M2      | -0.52 | 0.350573 | 0.911 |
| OR52D1     | -0.52 | 0.374796 | 0.923 |
| PALLD      | -0.52 | 0.350572 | 0.911 |
| PAWR       | -0.52 | 0.350572 | 0.911 |
| PAX8       | -0.52 | 0.350572 | 0.911 |
| PAX9       | -0.52 | 0.350572 | 0.911 |
| PIANP      | -0.52 | 0.401998 | 0.923 |
| PKD2L1     | -0.52 | 0.350572 | 0.911 |
| PLCG2      | -0.52 | 0.350572 | 0.911 |
| PLXNB2     | -0.52 | 0.350572 | 0.911 |
| PODXL      | -0.52 | 0.350572 | 0.911 |
| RAB33B     | -0.52 | 0.374797 | 0.923 |
| RABL3      | -0.52 | 0.350572 | 0.911 |
| RAD52      | -0.52 | 0.350572 | 0.911 |
| RAI1       | -0.52 | 0.401998 | 0.923 |
| RGS17      | -0.52 | 0.350572 | 0.911 |
| SBDS       | -0.52 | 0.350573 | 0.911 |
| SERPINA9   | -0.52 | 0.350573 | 0.911 |
| SH3YL1     | -0.52 | 0.350573 | 0.911 |
| SHISA2     | -0.52 | 0.350572 | 0.911 |
| SHISA6     | -0.52 | 0.350572 | 0.911 |
| SIGLEC11   | -0.52 | 0.350572 | 0.911 |
| SLC41A1    | -0.52 | 0.374797 | 0.923 |
| SNTN       | -0.52 | 0.350572 | 0.911 |
| SUMO3      | -0.52 | 0.350572 | 0.911 |
| SYCP2      | -0.52 | 0.350572 | 0.911 |
| SYNPO      | -0.52 | 0.350573 | 0.911 |

|          |       |          |       |
|----------|-------|----------|-------|
| TGIF2LX  | -0.52 | 0.350572 | 0.911 |
| TP53RK   | -0.52 | 0.401998 | 0.923 |
| TULP1    | -0.52 | 0.350572 | 0.911 |
| UBE2U    | -0.52 | 0.350572 | 0.911 |
| UNC13C   | -0.52 | 0.350573 | 0.911 |
| UNC5B    | -0.52 | 0.350572 | 0.911 |
| UNC93B1  | -0.52 | 0.350572 | 0.911 |
| USE1     | -0.52 | 0.350572 | 0.911 |
| VSIG4    | -0.52 | 0.350572 | 0.911 |
| VWA8     | -0.52 | 0.350572 | 0.911 |
| WFDC1    | -0.52 | 0.350572 | 0.911 |
| ZC3H12C  | -0.52 | 0.350572 | 0.911 |
| ZFHX3    | -0.52 | 0.350572 | 0.911 |
| ZFPM1    | -0.52 | 0.350573 | 0.911 |
| ZNF404   | -0.52 | 0.350572 | 0.911 |
| ZNF467   | -0.52 | 0.350573 | 0.911 |
| ZNF560   | -0.52 | 0.350572 | 0.911 |
| ZNF664   | -0.52 | 0.350573 | 0.911 |
| ZNF721   | -0.52 | 0.350572 | 0.911 |
| ZNF76    | -0.52 | 0.350572 | 0.911 |
| ZNF785   | -0.52 | 0.374797 | 0.923 |
| ABCA2    | -0.51 | 0.359634 | 0.915 |
| ARMCX5   | -0.51 | 0.359634 | 0.915 |
| ATIC     | -0.51 | 0.359634 | 0.915 |
| B3GNT3   | -0.51 | 0.359634 | 0.915 |
| BCL2     | -0.51 | 0.359633 | 0.915 |
| C16orf72 | -0.51 | 0.38384  | 0.923 |
| C9       | -0.51 | 0.359633 | 0.915 |
| CDH5     | -0.51 | 0.359634 | 0.915 |
| CDO1     | -0.51 | 0.359634 | 0.915 |
| CETN1    | -0.51 | 0.38384  | 0.923 |
| CREBZF   | -0.51 | 0.38384  | 0.923 |
| CSF2RB   | -0.51 | 0.38384  | 0.923 |
| DAXX     | -0.51 | 0.359634 | 0.915 |
| EIF2S1   | -0.51 | 0.553638 | 0.957 |
| ETNPPL   | -0.51 | 0.359634 | 0.915 |
| ETS2     | -0.51 | 0.359634 | 0.915 |
| FAM219A  | -0.51 | 0.359633 | 0.915 |
| FANCC    | -0.51 | 0.359633 | 0.915 |
| FCGR1B   | -0.51 | 0.359634 | 0.915 |
| FCRL1    | -0.51 | 0.359634 | 0.915 |
| FEV      | -0.51 | 0.359634 | 0.915 |
| FSBP     | -0.51 | 0.410877 | 0.93  |
| GOLGA7B  | -0.51 | 0.359634 | 0.915 |
| GPR176   | -0.51 | 0.359634 | 0.915 |
| GPX4     | -0.51 | 0.359634 | 0.915 |
| HOMER1   | -0.51 | 0.359634 | 0.915 |

|         |       |          |       |
|---------|-------|----------|-------|
| IDH2    | -0.51 | 0.359634 | 0.915 |
| IQSEC1  | -0.51 | 0.359634 | 0.915 |
| JSRP1   | -0.51 | 0.359634 | 0.915 |
| KCNA6   | -0.51 | 0.38384  | 0.923 |
| KRT83   | -0.51 | 0.359634 | 0.915 |
| KYNU    | -0.51 | 0.359634 | 0.915 |
| LACRT   | -0.51 | 0.359634 | 0.915 |
| LILRB1  | -0.51 | 0.38384  | 0.923 |
| LRPPRC  | -0.51 | 0.38384  | 0.923 |
| MIER3   | -0.51 | 0.359634 | 0.915 |
| MMRN1   | -0.51 | 0.359634 | 0.915 |
| MRPL46  | -0.51 | 0.38384  | 0.923 |
| MYBPC3  | -0.51 | 0.38384  | 0.923 |
| MYBPH   | -0.51 | 0.359634 | 0.915 |
| NHLH2   | -0.51 | 0.38384  | 0.923 |
| OR51S1  | -0.51 | 0.359634 | 0.915 |
| OSM     | -0.51 | 0.359634 | 0.915 |
| PCDHGA6 | -0.51 | 0.359634 | 0.915 |
| PDZK1   | -0.51 | 0.359633 | 0.915 |
| PGK1    | -0.51 | 0.359633 | 0.915 |
| PIRT    | -0.51 | 0.359634 | 0.915 |
| POLR2K  | -0.51 | 0.473541 | 0.948 |
| PRDM2   | -0.51 | 0.38384  | 0.923 |
| PTPRS   | -0.51 | 0.383841 | 0.923 |
| PYDC2   | -0.51 | 0.359634 | 0.915 |
| RIT1    | -0.51 | 0.359634 | 0.915 |
| RNF225  | -0.51 | 0.359634 | 0.915 |
| SMYD1   | -0.51 | 0.359633 | 0.915 |
| SRD5A3  | -0.51 | 0.359634 | 0.915 |
| SUGP1   | -0.51 | 0.38384  | 0.923 |
| THAP4   | -0.51 | 0.359634 | 0.915 |
| TIPARP  | -0.51 | 0.359634 | 0.915 |
| TMOD1   | -0.51 | 0.359634 | 0.915 |
| TMOD3   | -0.51 | 0.359634 | 0.915 |
| TOLLIP  | -0.51 | 0.359634 | 0.915 |
| TRERF1  | -0.51 | 0.359634 | 0.915 |
| TRIM60  | -0.51 | 0.359633 | 0.915 |
| TUBAL3  | -0.51 | 0.359633 | 0.915 |
| TXN     | -0.51 | 0.359634 | 0.915 |
| UBR2    | -0.51 | 0.359634 | 0.915 |
| XPC     | -0.51 | 0.359634 | 0.915 |
| XRCC3   | -0.51 | 0.359634 | 0.915 |
| ZGPAT   | -0.51 | 0.383841 | 0.923 |
| ZNF175  | -0.51 | 0.359634 | 0.915 |
| ZNF22   | -0.51 | 0.359634 | 0.915 |
| ZNF461  | -0.51 | 0.359634 | 0.915 |
| ZNF530  | -0.51 | 0.359634 | 0.915 |

|           |       |          |       |
|-----------|-------|----------|-------|
| ZNF703    | -0.51 | 0.359634 | 0.915 |
| ZNF880    | -0.51 | 0.359634 | 0.915 |
| ABCC8     | -0.5  | 0.368922 | 0.919 |
| ACSM4     | -0.5  | 0.368923 | 0.919 |
| ADM5      | -0.5  | 0.392985 | 0.923 |
| AFF2      | -0.5  | 0.368922 | 0.919 |
| AIRE      | -0.5  | 0.368922 | 0.919 |
| APOBEC3B  | -0.5  | 0.368922 | 0.919 |
| ARID4B    | -0.5  | 0.392985 | 0.923 |
| ARPC5L    | -0.5  | 0.392985 | 0.923 |
| ATRX      | -0.5  | 0.368922 | 0.919 |
| BACE2     | -0.5  | 0.368922 | 0.919 |
| BICD1     | -0.5  | 0.368922 | 0.919 |
| BTBD9     | -0.5  | 0.392986 | 0.923 |
| C8orf48   | -0.5  | 0.368922 | 0.919 |
| C9orf24   | -0.5  | 0.368923 | 0.919 |
| CAPN15    | -0.5  | 0.368922 | 0.919 |
| CHGA      | -0.5  | 0.392985 | 0.923 |
| CLMN      | -0.5  | 0.368923 | 0.919 |
| CMTM2     | -0.5  | 0.368922 | 0.919 |
| CYP2D6    | -0.5  | 0.368922 | 0.919 |
| DNAJC14   | -0.5  | 0.392986 | 0.923 |
| DYNC1LI1  | -0.5  | 0.368922 | 0.919 |
| ENDOV     | -0.5  | 0.368922 | 0.919 |
| ERVV-1    | -0.5  | 0.392986 | 0.923 |
| EYS       | -0.5  | 0.368923 | 0.919 |
| FAM200B   | -0.5  | 0.368922 | 0.919 |
| FHDC1     | -0.5  | 0.368922 | 0.919 |
| GALC      | -0.5  | 0.392985 | 0.923 |
| GALNT15   | -0.5  | 0.368922 | 0.919 |
| GDF1      | -0.5  | 0.392985 | 0.923 |
| GPR162    | -0.5  | 0.368922 | 0.919 |
| HDLBP     | -0.5  | 0.368923 | 0.919 |
| JRKL      | -0.5  | 0.368923 | 0.919 |
| JUP       | -0.5  | 0.368923 | 0.919 |
| KCNH4     | -0.5  | 0.368922 | 0.919 |
| KIAA1217  | -0.5  | 0.368922 | 0.919 |
| KIAA1257  | -0.5  | 0.392985 | 0.923 |
| KRT74     | -0.5  | 0.368922 | 0.919 |
| KRTDAP    | -0.5  | 0.392986 | 0.923 |
| LGR4      | -0.5  | 0.368922 | 0.919 |
| LOC388813 | -0.5  | 0.419846 | 0.931 |
| MCM5      | -0.5  | 0.368922 | 0.919 |
| MLLT6     | -0.5  | 0.419847 | 0.931 |
| NFKB1     | -0.5  | 0.368922 | 0.919 |
| NMRAL1    | -0.5  | 0.392986 | 0.923 |
| NRL       | -0.5  | 0.368922 | 0.919 |

|          |       |          |       |
|----------|-------|----------|-------|
| NSMF     | -0.5  | 0.392986 | 0.923 |
| NUP205   | -0.5  | 0.368922 | 0.919 |
| OR13C3   | -0.5  | 0.368922 | 0.919 |
| OR2M5    | -0.5  | 0.392986 | 0.923 |
| PINLYP   | -0.5  | 0.368922 | 0.919 |
| PPP1R1C  | -0.5  | 0.368923 | 0.919 |
| PRAMEF16 | -0.5  | 0.368923 | 0.919 |
| PRDM4    | -0.5  | 0.368922 | 0.919 |
| PRF1     | -0.5  | 0.392986 | 0.923 |
| PSG3     | -0.5  | 0.392985 | 0.923 |
| PYGB     | -0.5  | 0.368922 | 0.919 |
| RALY     | -0.5  | 0.368922 | 0.919 |
| RASSF3   | -0.5  | 0.368922 | 0.919 |
| RHBDD1   | -0.5  | 0.368922 | 0.919 |
| RHOBTB3  | -0.5  | 0.392985 | 0.923 |
| RIT2     | -0.5  | 0.368922 | 0.919 |
| RNF4     | -0.5  | 0.368922 | 0.919 |
| SATB1    | -0.5  | 0.368923 | 0.919 |
| SCN1A    | -0.5  | 0.368922 | 0.919 |
| SH3BP5   | -0.5  | 0.368923 | 0.919 |
| SIRPA    | -0.5  | 0.368922 | 0.919 |
| SLC8A3   | -0.5  | 0.368922 | 0.919 |
| SOGA2    | -0.5  | 0.419847 | 0.931 |
| SOX14    | -0.5  | 0.368923 | 0.919 |
| SPACA3   | -0.5  | 0.368922 | 0.919 |
| STOX1    | -0.5  | 0.368922 | 0.919 |
| TAAR8    | -0.5  | 0.368922 | 0.919 |
| TCEB1    | -0.5  | 0.368922 | 0.919 |
| THOC6    | -0.5  | 0.368922 | 0.919 |
| TMEM64   | -0.5  | 0.419847 | 0.931 |
| TRIM54   | -0.5  | 0.368923 | 0.919 |
| TRIML2   | -0.5  | 0.368922 | 0.919 |
| TVP23A   | -0.5  | 0.368922 | 0.919 |
| WBSCR17  | -0.5  | 0.392986 | 0.923 |
| WNT3A    | -0.5  | 0.368922 | 0.919 |
| XAGE1B   | -0.5  | 0.368922 | 0.919 |
| XAGE1E   | -0.5  | 0.368922 | 0.919 |
| AR       | -0.49 | 0.378308 | 0.923 |
| BAZ1B    | -0.49 | 0.402273 | 0.923 |
| BBS4     | -0.49 | 0.378308 | 0.923 |
| BHMG1    | -0.49 | 0.378308 | 0.923 |
| C17orf70 | -0.49 | 0.378307 | 0.923 |
| C19orf10 | -0.49 | 0.378308 | 0.923 |
| C9orf139 | -0.49 | 0.378308 | 0.923 |
| CALCA    | -0.49 | 0.378307 | 0.923 |
| CDC42EP1 | -0.49 | 0.378307 | 0.923 |
| CRISP2   | -0.49 | 0.378308 | 0.923 |

|           |       |          |       |
|-----------|-------|----------|-------|
| CX3CL1    | -0.49 | 0.378308 | 0.923 |
| DAGLB     | -0.49 | 0.378307 | 0.923 |
| DBF4      | -0.49 | 0.378308 | 0.923 |
| DEAF1     | -0.49 | 0.402273 | 0.923 |
| EAPP      | -0.49 | 0.378308 | 0.923 |
| ENGASE    | -0.49 | 0.378308 | 0.923 |
| EPB41L5   | -0.49 | 0.378308 | 0.923 |
| EVC       | -0.49 | 0.378308 | 0.923 |
| FAM183A   | -0.49 | 0.402273 | 0.923 |
| FOXO1     | -0.49 | 0.402273 | 0.923 |
| FPR3      | -0.49 | 0.378308 | 0.923 |
| GIT1      | -0.49 | 0.378308 | 0.923 |
| GPR75-ASB | -0.49 | 0.378308 | 0.923 |
| GRB2      | -0.49 | 0.378308 | 0.923 |
| GTF3C4    | -0.49 | 0.402272 | 0.923 |
| HAS1      | -0.49 | 0.378307 | 0.923 |
| HBEGF     | -0.49 | 0.378308 | 0.923 |
| HESX1     | -0.49 | 0.378307 | 0.923 |
| HIST1H3J  | -0.49 | 0.378308 | 0.923 |
| HS3ST5    | -0.49 | 0.378308 | 0.923 |
| IL10      | -0.49 | 0.378307 | 0.923 |
| IL21R     | -0.49 | 0.378308 | 0.923 |
| IL36A     | -0.49 | 0.402272 | 0.923 |
| KIAA0930  | -0.49 | 0.402273 | 0.923 |
| KIAA1045  | -0.49 | 0.378308 | 0.923 |
| KPTN      | -0.49 | 0.378308 | 0.923 |
| KRTAP9-8  | -0.49 | 0.378308 | 0.923 |
| MED16     | -0.49 | 0.402272 | 0.923 |
| NEU1      | -0.49 | 0.378308 | 0.923 |
| NEURL3    | -0.49 | 0.378308 | 0.923 |
| NGEF      | -0.49 | 0.378308 | 0.923 |
| OR4K2     | -0.49 | 0.378307 | 0.923 |
| PDGFRB    | -0.49 | 0.378308 | 0.923 |
| PDIA2     | -0.49 | 0.378308 | 0.923 |
| PK1       | -0.49 | 0.378308 | 0.923 |
| PFDN6     | -0.49 | 0.428939 | 0.931 |
| PHACTR3   | -0.49 | 0.42894  | 0.931 |
| PHF5A     | -0.49 | 0.42894  | 0.931 |
| POLL      | -0.49 | 0.378308 | 0.923 |
| PPIAL4E   | -0.49 | 0.42894  | 0.931 |
| PPP1R42   | -0.49 | 0.378308 | 0.923 |
| PRSS53    | -0.49 | 0.42894  | 0.931 |
| PSTPIP2   | -0.49 | 0.378308 | 0.923 |
| RAB18     | -0.49 | 0.378308 | 0.923 |
| SEPW1     | -0.49 | 0.428939 | 0.931 |
| SFMBT2    | -0.49 | 0.402272 | 0.923 |
| SIAH3     | -0.49 | 0.402273 | 0.923 |

|          |       |          |       |
|----------|-------|----------|-------|
| SLC17A4  | -0.49 | 0.378307 | 0.923 |
| SLC29A1  | -0.49 | 0.378308 | 0.923 |
| SLC2A7   | -0.49 | 0.402272 | 0.923 |
| SLC52A2  | -0.49 | 0.378308 | 0.923 |
| SLK      | -0.49 | 0.402273 | 0.923 |
| SOCS7    | -0.49 | 0.42894  | 0.931 |
| SPANXC   | -0.49 | 0.378308 | 0.923 |
| SPINT1   | -0.49 | 0.378308 | 0.923 |
| STAG3    | -0.49 | 0.378308 | 0.923 |
| STK10    | -0.49 | 0.378308 | 0.923 |
| STMN2    | -0.49 | 0.378308 | 0.923 |
| STYXL1   | -0.49 | 0.378307 | 0.923 |
| TBC1D14  | -0.49 | 0.378308 | 0.923 |
| TBX6     | -0.49 | 0.378307 | 0.923 |
| TET3     | -0.49 | 0.378307 | 0.923 |
| TMEM143  | -0.49 | 0.402273 | 0.923 |
| TRABD2B  | -0.49 | 0.378308 | 0.923 |
| UNC13B   | -0.49 | 0.378308 | 0.923 |
| VWA5B1   | -0.49 | 0.378308 | 0.923 |
| WSB1     | -0.49 | 0.402272 | 0.923 |
| ZSCAN4   | -0.49 | 0.378308 | 0.923 |
| AIFM3    | -0.48 | 0.387903 | 0.923 |
| AMDHD1   | -0.48 | 0.387903 | 0.923 |
| ANKDD1A  | -0.48 | 0.387903 | 0.923 |
| ARAP2    | -0.48 | 0.387902 | 0.923 |
| AZI1     | -0.48 | 0.438164 | 0.932 |
| BANP     | -0.48 | 0.387903 | 0.923 |
| BEND6    | -0.48 | 0.387903 | 0.923 |
| BRWD3    | -0.48 | 0.387903 | 0.923 |
| BUB1     | -0.48 | 0.387903 | 0.923 |
| C11orf40 | -0.48 | 0.387903 | 0.923 |
| C14orf80 | -0.48 | 0.387903 | 0.923 |
| C15orf65 | -0.48 | 0.387903 | 0.923 |
| C6orf136 | -0.48 | 0.387903 | 0.923 |
| CD36     | -0.48 | 0.387903 | 0.923 |
| CDC42SE1 | -0.48 | 0.387903 | 0.923 |
| CENPT    | -0.48 | 0.387903 | 0.923 |
| CLEC3A   | -0.48 | 0.387902 | 0.923 |
| COL21A1  | -0.48 | 0.387903 | 0.923 |
| COLEC11  | -0.48 | 0.387903 | 0.923 |
| CSAG3    | -0.48 | 0.387903 | 0.923 |
| CT45A6   | -0.48 | 0.387903 | 0.923 |
| CYP2B6   | -0.48 | 0.387903 | 0.923 |
| DIRAS2   | -0.48 | 0.387903 | 0.923 |
| ERVV-2   | -0.48 | 0.387903 | 0.923 |
| FASTKD1  | -0.48 | 0.387903 | 0.923 |
| FGFR3    | -0.48 | 0.387903 | 0.923 |

|           |       |          |       |
|-----------|-------|----------|-------|
| GNG2      | -0.48 | 0.387903 | 0.923 |
| GRINA     | -0.48 | 0.387903 | 0.923 |
| HIST1H2AE | -0.48 | 0.387903 | 0.923 |
| HIST1H2AI | -0.48 | 0.387903 | 0.923 |
| HIST1H2BB | -0.48 | 0.411665 | 0.93  |
| HRASLS2   | -0.48 | 0.387902 | 0.923 |
| IGSF21    | -0.48 | 0.387902 | 0.923 |
| IRGM      | -0.48 | 0.387903 | 0.923 |
| IST1      | -0.48 | 0.387903 | 0.923 |
| KCNE2     | -0.48 | 0.387903 | 0.923 |
| KIAA1161  | -0.48 | 0.411665 | 0.93  |
| KMO       | -0.48 | 0.387903 | 0.923 |
| LEMD2     | -0.48 | 0.387903 | 0.923 |
| LRCH1     | -0.48 | 0.438164 | 0.932 |
| LRRC29    | -0.48 | 0.387903 | 0.923 |
| LUZP2     | -0.48 | 0.387903 | 0.923 |
| MAMDC2    | -0.48 | 0.387902 | 0.923 |
| MARK1     | -0.48 | 0.387902 | 0.923 |
| MERTK     | -0.48 | 0.387903 | 0.923 |
| METAP1    | -0.48 | 0.387903 | 0.923 |
| MSH6      | -0.48 | 0.387903 | 0.923 |
| MXD4      | -0.48 | 0.387903 | 0.923 |
| MYOF      | -0.48 | 0.438164 | 0.932 |
| NBPF1     | -0.48 | 0.387903 | 0.923 |
| NLGN1     | -0.48 | 0.387903 | 0.923 |
| NPTXR     | -0.48 | 0.387902 | 0.923 |
| NQO2      | -0.48 | 0.387902 | 0.923 |
| NUDT9     | -0.48 | 0.387903 | 0.923 |
| OAZ3      | -0.48 | 0.387902 | 0.923 |
| OR8B12    | -0.48 | 0.387903 | 0.923 |
| PIK3C2B   | -0.48 | 0.387903 | 0.923 |
| PIWIL4    | -0.48 | 0.387903 | 0.923 |
| PPIAL4F   | -0.48 | 0.438163 | 0.932 |
| PRCC      | -0.48 | 0.411665 | 0.93  |
| PRKG1     | -0.48 | 0.411665 | 0.93  |
| PRSS23    | -0.48 | 0.387903 | 0.923 |
| RAP1GAP2  | -0.48 | 0.387903 | 0.923 |
| RNF207    | -0.48 | 0.387903 | 0.923 |
| RPL13     | -0.48 | 0.535602 | 0.953 |
| SEC24B    | -0.48 | 0.387902 | 0.923 |
| SLC14A2   | -0.48 | 0.387902 | 0.923 |
| SNRPA     | -0.48 | 0.387903 | 0.923 |
| SPAG5     | -0.48 | 0.387902 | 0.923 |
| SPECC1L   | -0.48 | 0.411665 | 0.93  |
| SURF1     | -0.48 | 0.387903 | 0.923 |
| TRIM22    | -0.48 | 0.387903 | 0.923 |
| TUBB6     | -0.48 | 0.387903 | 0.923 |

|            |       |          |       |
|------------|-------|----------|-------|
| VWDE       | -0.48 | 0.387902 | 0.923 |
| ZFP69B     | -0.48 | 0.387903 | 0.923 |
| ZMAT1      | -0.48 | 0.411665 | 0.93  |
| ZNF607     | -0.48 | 0.411666 | 0.93  |
| ZNF69      | -0.48 | 0.387903 | 0.923 |
| ABHD14A    | -0.47 | 0.397586 | 0.923 |
| AKAP12     | -0.47 | 0.44751  | 0.936 |
| ALDH16A1   | -0.47 | 0.397585 | 0.923 |
| ANKRD34B   | -0.47 | 0.397585 | 0.923 |
| AQP5       | -0.47 | 0.397586 | 0.923 |
| C10orf105  | -0.47 | 0.397586 | 0.923 |
| C17orf82   | -0.47 | 0.397586 | 0.923 |
| C8orf44    | -0.47 | 0.397585 | 0.923 |
| CDCA4      | -0.47 | 0.421211 | 0.931 |
| CDH16      | -0.47 | 0.397586 | 0.923 |
| CDH26      | -0.47 | 0.421211 | 0.931 |
| CEP152     | -0.47 | 0.397585 | 0.923 |
| CHRND      | -0.47 | 0.397585 | 0.923 |
| CLTCL1     | -0.47 | 0.42121  | 0.931 |
| CPEB1      | -0.47 | 0.421211 | 0.931 |
| CPT1C      | -0.47 | 0.397585 | 0.923 |
| CSE1L      | -0.47 | 0.476358 | 0.948 |
| CTNNA2     | -0.47 | 0.397585 | 0.923 |
| CTXN1      | -0.47 | 0.397585 | 0.923 |
| CXorf64    | -0.47 | 0.421211 | 0.931 |
| DAB2       | -0.47 | 0.397586 | 0.923 |
| DEC1       | -0.47 | 0.397585 | 0.923 |
| DNAL1      | -0.47 | 0.397586 | 0.923 |
| DYRK3      | -0.47 | 0.397585 | 0.923 |
| EFHD1      | -0.47 | 0.397585 | 0.923 |
| FAM72D     | -0.47 | 0.397585 | 0.923 |
| FCHSD2     | -0.47 | 0.397585 | 0.923 |
| FERMT2     | -0.47 | 0.397586 | 0.923 |
| FMO3       | -0.47 | 0.397585 | 0.923 |
| FOS        | -0.47 | 0.397585 | 0.923 |
| FOXM1      | -0.47 | 0.421211 | 0.931 |
| GATA5      | -0.47 | 0.397585 | 0.923 |
| GLT6D1     | -0.47 | 0.397586 | 0.923 |
| GML        | -0.47 | 0.397585 | 0.923 |
| GRHL1      | -0.47 | 0.397585 | 0.923 |
| GYPC       | -0.47 | 0.397585 | 0.923 |
| HES1       | -0.47 | 0.397586 | 0.923 |
| HIST2H2AA1 | -0.47 | 0.397585 | 0.923 |
| HIST2H2AA4 | -0.47 | 0.397585 | 0.923 |
| HSPB9      | -0.47 | 0.397585 | 0.923 |
| IGF2BP3    | -0.47 | 0.397585 | 0.923 |
| IZUMO3     | -0.47 | 0.397585 | 0.923 |

|           |       |          |       |
|-----------|-------|----------|-------|
| KIAA1429  | -0.47 | 0.447511 | 0.936 |
| KLHL10    | -0.47 | 0.397585 | 0.923 |
| KLHL18    | -0.47 | 0.397585 | 0.923 |
| KLRK1     | -0.47 | 0.397585 | 0.923 |
| KNG1      | -0.47 | 0.397585 | 0.923 |
| KRTAP13-2 | -0.47 | 0.397585 | 0.923 |
| LATS2     | -0.47 | 0.397585 | 0.923 |
| LDOC1L    | -0.47 | 0.397586 | 0.923 |
| LGALS9C   | -0.47 | 0.397585 | 0.923 |
| MAML3     | -0.47 | 0.397585 | 0.923 |
| MAP1B     | -0.47 | 0.421211 | 0.931 |
| MDM1      | -0.47 | 0.421211 | 0.931 |
| MTR       | -0.47 | 0.397586 | 0.923 |
| NEUROD4   | -0.47 | 0.397585 | 0.923 |
| NFKBIL1   | -0.47 | 0.397586 | 0.923 |
| NKX2-3    | -0.47 | 0.397586 | 0.923 |
| OC90      | -0.47 | 0.397585 | 0.923 |
| OR52K2    | -0.47 | 0.397585 | 0.923 |
| PARL      | -0.47 | 0.42121  | 0.931 |
| PASK      | -0.47 | 0.397585 | 0.923 |
| PHACTR2   | -0.47 | 0.397586 | 0.923 |
| PIK3R6    | -0.47 | 0.397586 | 0.923 |
| PLA2G1B   | -0.47 | 0.397586 | 0.923 |
| PLA2G4E   | -0.47 | 0.397586 | 0.923 |
| PPM1B     | -0.47 | 0.397585 | 0.923 |
| PPP1R3F   | -0.47 | 0.42121  | 0.931 |
| PRDM1     | -0.47 | 0.421211 | 0.931 |
| PRELP     | -0.47 | 0.397585 | 0.923 |
| PRKACG    | -0.47 | 0.397585 | 0.923 |
| PSEN2     | -0.47 | 0.421211 | 0.931 |
| SCUBE2    | -0.47 | 0.397586 | 0.923 |
| SEC11C    | -0.47 | 0.397585 | 0.923 |
| SESN3     | -0.47 | 0.397585 | 0.923 |
| SHFM1     | -0.47 | 0.507907 | 0.949 |
| SLC12A7   | -0.47 | 0.421211 | 0.931 |
| SLC16A14  | -0.47 | 0.397585 | 0.923 |
| SLC24A1   | -0.47 | 0.397586 | 0.923 |
| SLC35A5   | -0.47 | 0.397586 | 0.923 |
| SLC5A5    | -0.47 | 0.397585 | 0.923 |
| SLC6A7    | -0.47 | 0.397585 | 0.923 |
| SMAD1     | -0.47 | 0.421211 | 0.931 |
| SMIM21    | -0.47 | 0.397586 | 0.923 |
| SNRNP48   | -0.47 | 0.421211 | 0.931 |
| SOX21     | -0.47 | 0.397585 | 0.923 |
| SPN       | -0.47 | 0.397586 | 0.923 |
| STX1A     | -0.47 | 0.397586 | 0.923 |
| SUV420H2  | -0.47 | 0.397586 | 0.923 |

|          |       |          |       |
|----------|-------|----------|-------|
| TAB3     | -0.47 | 0.421211 | 0.931 |
| TAT      | -0.47 | 0.397585 | 0.923 |
| THEM4    | -0.47 | 0.397585 | 0.923 |
| THUMPD2  | -0.47 | 0.397586 | 0.923 |
| TMED10   | -0.47 | 0.397585 | 0.923 |
| TMEM144  | -0.47 | 0.397586 | 0.923 |
| UBE2Q2   | -0.47 | 0.397585 | 0.923 |
| UCK2     | -0.47 | 0.397586 | 0.923 |
| UCN      | -0.47 | 0.397586 | 0.923 |
| YWHAZ    | -0.47 | 0.397586 | 0.923 |
| ZNF346   | -0.47 | 0.397585 | 0.923 |
| ABHD1    | -0.46 | 0.407438 | 0.923 |
| ADAT1    | -0.46 | 0.407438 | 0.923 |
| ADCY6    | -0.46 | 0.407438 | 0.923 |
| AGBL5    | -0.46 | 0.456996 | 0.939 |
| AP2M1    | -0.46 | 0.430927 | 0.931 |
| B3GNT2   | -0.46 | 0.407438 | 0.923 |
| BAHCC1   | -0.46 | 0.407438 | 0.923 |
| BANF2    | -0.46 | 0.407438 | 0.923 |
| BDKRB2   | -0.46 | 0.407438 | 0.923 |
| BRD4     | -0.46 | 0.485507 | 0.949 |
| CARTPT   | -0.46 | 0.407438 | 0.923 |
| CATSPER1 | -0.46 | 0.407438 | 0.923 |
| CCDC112  | -0.46 | 0.407438 | 0.923 |
| CCSAP    | -0.46 | 0.407438 | 0.923 |
| CD101    | -0.46 | 0.407438 | 0.923 |
| CD19     | -0.46 | 0.430927 | 0.931 |
| CEBPZ    | -0.46 | 0.430927 | 0.931 |
| CGREF1   | -0.46 | 0.407438 | 0.923 |
| CLIC6    | -0.46 | 0.430927 | 0.931 |
| CLIP1    | -0.46 | 0.407438 | 0.923 |
| CPNE6    | -0.46 | 0.407438 | 0.923 |
| CT45A2   | -0.46 | 0.407438 | 0.923 |
| CTNNBL1  | -0.46 | 0.407438 | 0.923 |
| DCAF10   | -0.46 | 0.407438 | 0.923 |
| DDX53    | -0.46 | 0.407438 | 0.923 |
| DLX3     | -0.46 | 0.407438 | 0.923 |
| DPEP1    | -0.46 | 0.407438 | 0.923 |
| DPPA4    | -0.46 | 0.407438 | 0.923 |
| EAF2     | -0.46 | 0.430927 | 0.931 |
| ETNK1    | -0.46 | 0.407438 | 0.923 |
| FAM213A  | -0.46 | 0.407438 | 0.923 |
| FBXL15   | -0.46 | 0.407438 | 0.923 |
| FECH     | -0.46 | 0.407438 | 0.923 |
| FGFRL1   | -0.46 | 0.407438 | 0.923 |
| GAS6     | -0.46 | 0.407438 | 0.923 |
| GLRX     | -0.46 | 0.407438 | 0.923 |

|          |       |          |       |
|----------|-------|----------|-------|
| GPR116   | -0.46 | 0.407438 | 0.923 |
| HYAL1    | -0.46 | 0.407438 | 0.923 |
| INSM2    | -0.46 | 0.407438 | 0.923 |
| KIAA1009 | -0.46 | 0.407438 | 0.923 |
| KLF1     | -0.46 | 0.407438 | 0.923 |
| KLF10    | -0.46 | 0.407438 | 0.923 |
| KLF4     | -0.46 | 0.407438 | 0.923 |
| LAPTM4B  | -0.46 | 0.407438 | 0.923 |
| LARS     | -0.46 | 0.456997 | 0.939 |
| LBX1     | -0.46 | 0.407438 | 0.923 |
| LIMS2    | -0.46 | 0.407438 | 0.923 |
| LOXL2    | -0.46 | 0.407438 | 0.923 |
| LRP11    | -0.46 | 0.407438 | 0.923 |
| LRP4     | -0.46 | 0.407438 | 0.923 |
| MFNG     | -0.46 | 0.430926 | 0.931 |
| MMEL1    | -0.46 | 0.407438 | 0.923 |
| MON1A    | -0.46 | 0.407438 | 0.923 |
| MTMR8    | -0.46 | 0.430927 | 0.931 |
| NACA     | -0.46 | 0.407438 | 0.923 |
| NACA2    | -0.46 | 0.407438 | 0.923 |
| NGFRAP1  | -0.46 | 0.407438 | 0.923 |
| NOL9     | -0.46 | 0.485507 | 0.949 |
| NOX4     | -0.46 | 0.407438 | 0.923 |
| NYX      | -0.46 | 0.407438 | 0.923 |
| OR1L3    | -0.46 | 0.430927 | 0.931 |
| OR4C16   | -0.46 | 0.407438 | 0.923 |
| PAK6     | -0.46 | 0.407438 | 0.923 |
| PCDH11X  | -0.46 | 0.407438 | 0.923 |
| PCDHGB1  | -0.46 | 0.407438 | 0.923 |
| PLOD2    | -0.46 | 0.407438 | 0.923 |
| PMS1     | -0.46 | 0.407438 | 0.923 |
| PMVK     | -0.46 | 0.407438 | 0.923 |
| POU2F3   | -0.46 | 0.407438 | 0.923 |
| PRKRA    | -0.46 | 0.407438 | 0.923 |
| PRSS48   | -0.46 | 0.407438 | 0.923 |
| PYCARD   | -0.46 | 0.407438 | 0.923 |
| RAB3IL1  | -0.46 | 0.407438 | 0.923 |
| RPL10    | -0.46 | 0.430927 | 0.931 |
| RPL23A   | -0.46 | 0.430926 | 0.931 |
| RTTN     | -0.46 | 0.407438 | 0.923 |
| SART3    | -0.46 | 0.485507 | 0.949 |
| SDHB     | -0.46 | 0.407438 | 0.923 |
| SEC23A   | -0.46 | 0.407438 | 0.923 |
| SERGEF   | -0.46 | 0.407438 | 0.923 |
| SMS      | -0.46 | 0.407438 | 0.923 |
| SPOCK2   | -0.46 | 0.407438 | 0.923 |
| STRN3    | -0.46 | 0.407438 | 0.923 |

|          |       |          |       |
|----------|-------|----------|-------|
| SWI5     | -0.46 | 0.430927 | 0.931 |
| SYN3     | -0.46 | 0.430927 | 0.931 |
| SYT12    | -0.46 | 0.407438 | 0.923 |
| TMEM117  | -0.46 | 0.407438 | 0.923 |
| TMEM170A | -0.46 | 0.407438 | 0.923 |
| TMEM252  | -0.46 | 0.407438 | 0.923 |
| TMEM66   | -0.46 | 0.407438 | 0.923 |
| TSC22D3  | -0.46 | 0.407438 | 0.923 |
| TSPAN13  | -0.46 | 0.407438 | 0.923 |
| TXLNA    | -0.46 | 0.430927 | 0.931 |
| UGT2B7   | -0.46 | 0.407438 | 0.923 |
| ZBTB3    | -0.46 | 0.407438 | 0.923 |
| ZCCHC18  | -0.46 | 0.407438 | 0.923 |
| ZFY      | -0.46 | 0.407438 | 0.923 |
| ZNF268   | -0.46 | 0.407438 | 0.923 |
| ZNF524   | -0.46 | 0.407438 | 0.923 |
| ZNF830   | -0.46 | 0.430926 | 0.931 |
| A2M      | -0.45 | 0.417344 | 0.93  |
| AHNAK    | -0.45 | 0.417344 | 0.93  |
| AKT2     | -0.45 | 0.417344 | 0.93  |
| AP3S1    | -0.45 | 0.417344 | 0.93  |
| ARFGAP3  | -0.45 | 0.417344 | 0.93  |
| ARSI     | -0.45 | 0.417344 | 0.93  |
| ATF6B    | -0.45 | 0.417344 | 0.93  |
| BEND5    | -0.45 | 0.440799 | 0.935 |
| BICD2    | -0.45 | 0.417345 | 0.93  |
| C19orf40 | -0.45 | 0.417344 | 0.93  |
| CABP4    | -0.45 | 0.417344 | 0.93  |
| CFAP45   | -0.45 | 0.560756 | 0.957 |
| CFL1     | -0.45 | 0.560756 | 0.957 |
| CLRN2    | -0.45 | 0.417344 | 0.93  |
| DAG1     | -0.45 | 0.417344 | 0.93  |
| DGKZ     | -0.45 | 0.417345 | 0.93  |
| DOCK9    | -0.45 | 0.417344 | 0.93  |
| EEF2K    | -0.45 | 0.417344 | 0.93  |
| ELN      | -0.45 | 0.417344 | 0.93  |
| EPHX3    | -0.45 | 0.417344 | 0.93  |
| EVA1A    | -0.45 | 0.417344 | 0.93  |
| FAHD2A   | -0.45 | 0.440798 | 0.935 |
| FAM157B  | -0.45 | 0.417344 | 0.93  |
| FAM47C   | -0.45 | 0.417345 | 0.93  |
| FBP2     | -0.45 | 0.417344 | 0.93  |
| FBXO27   | -0.45 | 0.417344 | 0.93  |
| FRMD7    | -0.45 | 0.440798 | 0.935 |
| GIPC1    | -0.45 | 0.417344 | 0.93  |
| GNGT2    | -0.45 | 0.417344 | 0.93  |
| HOXD13   | -0.45 | 0.417344 | 0.93  |

|           |       |          |       |
|-----------|-------|----------|-------|
| HYDIN     | -0.45 | 0.417344 | 0.93  |
| IL2       | -0.45 | 0.417345 | 0.93  |
| IL6ST     | -0.45 | 0.417344 | 0.93  |
| JMJD1C    | -0.45 | 0.417344 | 0.93  |
| KIF3A     | -0.45 | 0.417345 | 0.93  |
| LAD1      | -0.45 | 0.440799 | 0.935 |
| LAMC1     | -0.45 | 0.417344 | 0.93  |
| LAMTOR1   | -0.45 | 0.417344 | 0.93  |
| LRRC14    | -0.45 | 0.417344 | 0.93  |
| LTBP2     | -0.45 | 0.417345 | 0.93  |
| M1AP      | -0.45 | 0.417345 | 0.93  |
| MUC15     | -0.45 | 0.440798 | 0.935 |
| MUC5B     | -0.45 | 0.466627 | 0.944 |
| MYRIP     | -0.45 | 0.466626 | 0.944 |
| N6AMT2    | -0.45 | 0.417344 | 0.93  |
| NEFL      | -0.45 | 0.417344 | 0.93  |
| NKPD1     | -0.45 | 0.440799 | 0.935 |
| NOVA2     | -0.45 | 0.417345 | 0.93  |
| OLIG1     | -0.45 | 0.417344 | 0.93  |
| OPN1SW    | -0.45 | 0.417345 | 0.93  |
| OR1G1     | -0.45 | 0.417344 | 0.93  |
| PHB2      | -0.45 | 0.466626 | 0.944 |
| PIP4K2A   | -0.45 | 0.466626 | 0.944 |
| PLAC8L1   | -0.45 | 0.417345 | 0.93  |
| PLEKHS1   | -0.45 | 0.417344 | 0.93  |
| POC1B-GAL | -0.45 | 0.417344 | 0.93  |
| POTEI     | -0.45 | 0.466627 | 0.944 |
| POU1F1    | -0.45 | 0.417345 | 0.93  |
| PRAME     | -0.45 | 0.417344 | 0.93  |
| PRDX3     | -0.45 | 0.417344 | 0.93  |
| PRRT2     | -0.45 | 0.417345 | 0.93  |
| RAC3      | -0.45 | 0.417344 | 0.93  |
| RGS14     | -0.45 | 0.417344 | 0.93  |
| RHBDL1    | -0.45 | 0.417344 | 0.93  |
| RHEBL1    | -0.45 | 0.417344 | 0.93  |
| RUNX1T1   | -0.45 | 0.417344 | 0.93  |
| SMKR1     | -0.45 | 0.440799 | 0.935 |
| SMPD1     | -0.45 | 0.440799 | 0.935 |
| SPATA31A5 | -0.45 | 0.417344 | 0.93  |
| SRSF1     | -0.45 | 0.494734 | 0.949 |
| STUB1     | -0.45 | 0.417344 | 0.93  |
| SYT17     | -0.45 | 0.440799 | 0.935 |
| TESC      | -0.45 | 0.417344 | 0.93  |
| THBS3     | -0.45 | 0.417345 | 0.93  |
| TMEM132A  | -0.45 | 0.417344 | 0.93  |
| TMEM178B  | -0.45 | 0.417344 | 0.93  |
| TMEM31    | -0.45 | 0.417345 | 0.93  |

|           |       |          |       |
|-----------|-------|----------|-------|
| UROD      | -0.45 | 0.466626 | 0.944 |
| USP6NL    | -0.45 | 0.417345 | 0.93  |
| ZHX1      | -0.45 | 0.440798 | 0.935 |
| ZNF682    | -0.45 | 0.417344 | 0.93  |
| ABCD4     | -0.44 | 0.45069  | 0.938 |
| ABLIM3    | -0.44 | 0.45069  | 0.938 |
| AGAP8     | -0.44 | 0.45069  | 0.938 |
| AMY2A     | -0.44 | 0.427498 | 0.931 |
| APIP      | -0.44 | 0.427498 | 0.931 |
| ARHGAP40  | -0.44 | 0.427497 | 0.931 |
| ATF7IP2   | -0.44 | 0.427498 | 0.931 |
| ATP6V0A4  | -0.44 | 0.427498 | 0.931 |
| ATP6V1H   | -0.44 | 0.427498 | 0.931 |
| AXIN2     | -0.44 | 0.45069  | 0.938 |
| C11orf73  | -0.44 | 0.427498 | 0.931 |
| C1orf210  | -0.44 | 0.427497 | 0.931 |
| C4orf19   | -0.44 | 0.427497 | 0.931 |
| C5orf47   | -0.44 | 0.427498 | 0.931 |
| C9orf114  | -0.44 | 0.427498 | 0.931 |
| CA10      | -0.44 | 0.427497 | 0.931 |
| CC2D2A    | -0.44 | 0.427498 | 0.931 |
| CCDC155   | -0.44 | 0.45069  | 0.938 |
| CD27      | -0.44 | 0.427497 | 0.931 |
| CDHR1     | -0.44 | 0.427497 | 0.931 |
| CDRT1     | -0.44 | 0.427498 | 0.931 |
| CHERP     | -0.44 | 0.427498 | 0.931 |
| CLIP2     | -0.44 | 0.427498 | 0.931 |
| CLMP      | -0.44 | 0.45069  | 0.938 |
| CYTH2     | -0.44 | 0.427498 | 0.931 |
| DNASE1L1  | -0.44 | 0.427497 | 0.931 |
| DNPEP     | -0.44 | 0.427498 | 0.931 |
| DSCR3     | -0.44 | 0.427498 | 0.931 |
| DYNC2LI1  | -0.44 | 0.427498 | 0.931 |
| ELOVL2    | -0.44 | 0.427498 | 0.931 |
| EPHB3     | -0.44 | 0.427498 | 0.931 |
| FAM83B    | -0.44 | 0.427498 | 0.931 |
| FCGR2B    | -0.44 | 0.45069  | 0.938 |
| FGF23     | -0.44 | 0.427498 | 0.931 |
| GAGE2A    | -0.44 | 0.569207 | 0.957 |
| GNAI1     | -0.44 | 0.427498 | 0.931 |
| GNAI3     | -0.44 | 0.427498 | 0.931 |
| HGC6,3    | -0.44 | 0.607888 | 0.96  |
| IL18RAP   | -0.44 | 0.427498 | 0.931 |
| IRF5      | -0.44 | 0.427498 | 0.931 |
| KCNK12    | -0.44 | 0.427498 | 0.931 |
| KCTD9     | -0.44 | 0.427497 | 0.931 |
| KIAA1211L | -0.44 | 0.45069  | 0.938 |

|           |       |          |       |
|-----------|-------|----------|-------|
| KIAA1430  | -0.44 | 0.427498 | 0.931 |
| LPHN2     | -0.44 | 0.427498 | 0.931 |
| LRRFIP2   | -0.44 | 0.427498 | 0.931 |
| MFSD1     | -0.44 | 0.427498 | 0.931 |
| MGST3     | -0.44 | 0.427497 | 0.931 |
| MS4A18    | -0.44 | 0.45069  | 0.938 |
| MST1R     | -0.44 | 0.427498 | 0.931 |
| MYCBP2    | -0.44 | 0.427498 | 0.931 |
| MYH14     | -0.44 | 0.45069  | 0.938 |
| NPDC1     | -0.44 | 0.427498 | 0.931 |
| NPIPA5    | -0.44 | 0.504076 | 0.949 |
| NRK       | -0.44 | 0.427498 | 0.931 |
| OLFM3     | -0.44 | 0.427497 | 0.931 |
| OR10G2    | -0.44 | 0.427498 | 0.931 |
| OR5L1     | -0.44 | 0.427498 | 0.931 |
| OR6N1     | -0.44 | 0.427498 | 0.931 |
| PARD6G    | -0.44 | 0.427497 | 0.931 |
| PCMTD1    | -0.44 | 0.427498 | 0.931 |
| PDE4D     | -0.44 | 0.427497 | 0.931 |
| PDZD7     | -0.44 | 0.45069  | 0.938 |
| POTED     | -0.44 | 0.427498 | 0.931 |
| PQLC3     | -0.44 | 0.427497 | 0.931 |
| PRDM14    | -0.44 | 0.427498 | 0.931 |
| PRKX      | -0.44 | 0.45069  | 0.938 |
| PROP1     | -0.44 | 0.427497 | 0.931 |
| PRSS42    | -0.44 | 0.427498 | 0.931 |
| REC8      | -0.44 | 0.427498 | 0.931 |
| RHOXF2    | -0.44 | 0.427498 | 0.931 |
| RIMS1     | -0.44 | 0.427498 | 0.931 |
| RLN3      | -0.44 | 0.427497 | 0.931 |
| RORB      | -0.44 | 0.427498 | 0.931 |
| SH3RF1    | -0.44 | 0.427498 | 0.931 |
| SIX5      | -0.44 | 0.45069  | 0.938 |
| SLC13A3   | -0.44 | 0.45069  | 0.938 |
| SLC17A3   | -0.44 | 0.427498 | 0.931 |
| SLC27A5   | -0.44 | 0.427498 | 0.931 |
| SLC39A5   | -0.44 | 0.476372 | 0.948 |
| SRI       | -0.44 | 0.427497 | 0.931 |
| STRAP     | -0.44 | 0.427498 | 0.931 |
| STX3      | -0.44 | 0.427498 | 0.931 |
| TAS2R8    | -0.44 | 0.427498 | 0.931 |
| TECTB     | -0.44 | 0.427497 | 0.931 |
| THTPA     | -0.44 | 0.427497 | 0.931 |
| TMEM110-M | -0.44 | 0.427498 | 0.931 |
| TMEM257   | -0.44 | 0.45069  | 0.938 |
| TMIE      | -0.44 | 0.427498 | 0.931 |
| TNFSF8    | -0.44 | 0.427497 | 0.931 |

|            |       |          |       |
|------------|-------|----------|-------|
| TNRC6B     | -0.44 | 0.427498 | 0.931 |
| TRIM64C    | -0.44 | 0.427498 | 0.931 |
| ACOT12     | -0.43 | 0.437707 | 0.931 |
| ADIG       | -0.43 | 0.437707 | 0.931 |
| ANXA2R     | -0.43 | 0.460768 | 0.941 |
| AP1G2      | -0.43 | 0.437706 | 0.931 |
| ARL6       | -0.43 | 0.437707 | 0.931 |
| ART3       | -0.43 | 0.437706 | 0.931 |
| ASB18      | -0.43 | 0.437707 | 0.931 |
| BAZ2A      | -0.43 | 0.460768 | 0.941 |
| C14orf182  | -0.43 | 0.437707 | 0.931 |
| C16orf3    | -0.43 | 0.437707 | 0.931 |
| C22orf42   | -0.43 | 0.437707 | 0.931 |
| C6orf10    | -0.43 | 0.437706 | 0.931 |
| CDH18      | -0.43 | 0.437707 | 0.931 |
| CEBPB      | -0.43 | 0.437706 | 0.931 |
| CFHR4      | -0.43 | 0.437707 | 0.931 |
| CHADL      | -0.43 | 0.437707 | 0.931 |
| CLEC7A     | -0.43 | 0.437707 | 0.931 |
| CRISPLD1   | -0.43 | 0.437707 | 0.931 |
| CST1       | -0.43 | 0.460768 | 0.941 |
| CYP2C19    | -0.43 | 0.437706 | 0.931 |
| DDR GK1    | -0.43 | 0.460768 | 0.941 |
| DET1       | -0.43 | 0.437706 | 0.931 |
| DNAJA3     | -0.43 | 0.460768 | 0.941 |
| DTD1       | -0.43 | 0.437706 | 0.931 |
| DUSP2      | -0.43 | 0.437707 | 0.931 |
| E2F6       | -0.43 | 0.437706 | 0.931 |
| ERCC6L2    | -0.43 | 0.437707 | 0.931 |
| FAM120A    | -0.43 | 0.437706 | 0.931 |
| FAM131C    | -0.43 | 0.437707 | 0.931 |
| FAM47E-STI | -0.43 | 0.437707 | 0.931 |
| FNTA       | -0.43 | 0.437706 | 0.931 |
| FSCN3      | -0.43 | 0.437706 | 0.931 |
| GPR137C    | -0.43 | 0.460768 | 0.941 |
| GRPEL2     | -0.43 | 0.437706 | 0.931 |
| HIST1H2AL  | -0.43 | 0.460768 | 0.941 |
| HIST1H3H   | -0.43 | 0.437706 | 0.931 |
| HOXB9      | -0.43 | 0.437707 | 0.931 |
| IQCJ       | -0.43 | 0.437707 | 0.931 |
| IRX5       | -0.43 | 0.437707 | 0.931 |
| JUNB       | -0.43 | 0.460768 | 0.941 |
| KAT2B      | -0.43 | 0.437707 | 0.931 |
| KCTD20     | -0.43 | 0.437706 | 0.931 |
| KIAA1407   | -0.43 | 0.437707 | 0.931 |
| KIF1B      | -0.43 | 0.437706 | 0.931 |
| KIR2DL4    | -0.43 | 0.437706 | 0.931 |

|            |       |          |       |
|------------|-------|----------|-------|
| LCMT1      | -0.43 | 0.437707 | 0.931 |
| LGALS9     | -0.43 | 0.437706 | 0.931 |
| LOC1001345 | -0.43 | 0.437707 | 0.931 |
| MACF1      | -0.43 | 0.437707 | 0.931 |
| MECOM      | -0.43 | 0.437707 | 0.931 |
| MKS1       | -0.43 | 0.437707 | 0.931 |
| MRS2       | -0.43 | 0.437707 | 0.931 |
| MYBPHL     | -0.43 | 0.437707 | 0.931 |
| NEK10      | -0.43 | 0.437707 | 0.931 |
| NEXN       | -0.43 | 0.437707 | 0.931 |
| NOMO3      | -0.43 | 0.460768 | 0.941 |
| ODF3L2     | -0.43 | 0.437707 | 0.931 |
| OR2A1      | -0.43 | 0.437706 | 0.931 |
| OR2A42     | -0.43 | 0.437707 | 0.931 |
| OR52N4     | -0.43 | 0.437707 | 0.931 |
| PALD1      | -0.43 | 0.437707 | 0.931 |
| PAX7       | -0.43 | 0.437707 | 0.931 |
| PHF10      | -0.43 | 0.437706 | 0.931 |
| PIGL       | -0.43 | 0.437707 | 0.931 |
| PRAF2      | -0.43 | 0.437706 | 0.931 |
| PRR11      | -0.43 | 0.437706 | 0.931 |
| PRRX1      | -0.43 | 0.437706 | 0.931 |
| RBBP8      | -0.43 | 0.437706 | 0.931 |
| RBM42      | -0.43 | 0.460768 | 0.941 |
| RBM43      | -0.43 | 0.437707 | 0.931 |
| RFXAP      | -0.43 | 0.460768 | 0.941 |
| RGS22      | -0.43 | 0.437706 | 0.931 |
| RRP36      | -0.43 | 0.437707 | 0.931 |
| SCARF2     | -0.43 | 0.437706 | 0.931 |
| SGK3       | -0.43 | 0.437707 | 0.931 |
| SIN3B      | -0.43 | 0.437707 | 0.931 |
| SIPA1L2    | -0.43 | 0.437707 | 0.931 |
| SLC22A4    | -0.43 | 0.437706 | 0.931 |
| SLCO2A1    | -0.43 | 0.437706 | 0.931 |
| SNAP23     | -0.43 | 0.460768 | 0.941 |
| SNX33      | -0.43 | 0.437707 | 0.931 |
| ST13       | -0.43 | 0.437706 | 0.931 |
| TMEM106A   | -0.43 | 0.437707 | 0.931 |
| TMEM14E    | -0.43 | 0.437707 | 0.931 |
| TMEM208    | -0.43 | 0.437707 | 0.931 |
| TMEM231    | -0.43 | 0.437707 | 0.931 |
| TPD52      | -0.43 | 0.437706 | 0.931 |
| TUBD1      | -0.43 | 0.437707 | 0.931 |
| VN1R5      | -0.43 | 0.437707 | 0.931 |
| ZNF789     | -0.43 | 0.437706 | 0.931 |
| AHSA1      | -0.42 | 0.448171 | 0.936 |
| AHSG       | -0.42 | 0.448172 | 0.936 |

|          |       |          |       |
|----------|-------|----------|-------|
| ANGPT2   | -0.42 | 0.448172 | 0.936 |
| APOL6    | -0.42 | 0.471025 | 0.945 |
| ARX      | -0.42 | 0.448171 | 0.936 |
| ATG13    | -0.42 | 0.471025 | 0.945 |
| B4GALNT1 | -0.42 | 0.448171 | 0.936 |
| BNIP2    | -0.42 | 0.448171 | 0.936 |
| C17orf98 | -0.42 | 0.471025 | 0.945 |
| CC2D1B   | -0.42 | 0.448171 | 0.936 |
| COL25A1  | -0.42 | 0.448171 | 0.936 |
| COX11    | -0.42 | 0.448172 | 0.936 |
| DCC      | -0.42 | 0.448172 | 0.936 |
| DHRS12   | -0.42 | 0.448172 | 0.936 |
| DSC2     | -0.42 | 0.471025 | 0.945 |
| EMP2     | -0.42 | 0.448172 | 0.936 |
| ERBB2IP  | -0.42 | 0.448171 | 0.936 |
| FAM107B  | -0.42 | 0.448172 | 0.936 |
| FBXO36   | -0.42 | 0.448172 | 0.936 |
| FXR2     | -0.42 | 0.448171 | 0.936 |
| FZD4     | -0.42 | 0.471025 | 0.945 |
| GLRB     | -0.42 | 0.448172 | 0.936 |
| GPR19    | -0.42 | 0.448172 | 0.936 |
| GPR62    | -0.42 | 0.448172 | 0.936 |
| GZMK     | -0.42 | 0.448172 | 0.936 |
| HDAC3    | -0.42 | 0.471025 | 0.945 |
| HOXA2    | -0.42 | 0.471025 | 0.945 |
| HVCN1    | -0.42 | 0.448172 | 0.936 |
| IL3RA    | -0.42 | 0.448172 | 0.936 |
| IRF4     | -0.42 | 0.448172 | 0.936 |
| LEPREL1  | -0.42 | 0.448171 | 0.936 |
| MID2     | -0.42 | 0.471025 | 0.945 |
| NUCB2    | -0.42 | 0.448172 | 0.936 |
| NUP133   | -0.42 | 0.448171 | 0.936 |
| NUTM2D   | -0.42 | 0.448172 | 0.936 |
| OR51F1   | -0.42 | 0.448172 | 0.936 |
| OSBPL3   | -0.42 | 0.448171 | 0.936 |
| PCBP4    | -0.42 | 0.471025 | 0.945 |
| PCDH15   | -0.42 | 0.448172 | 0.936 |
| PCDHA4   | -0.42 | 0.448172 | 0.936 |
| PCDHGA2  | -0.42 | 0.448172 | 0.936 |
| PCDHGA9  | -0.42 | 0.448171 | 0.936 |
| PDPK1    | -0.42 | 0.448172 | 0.936 |
| PDXP     | -0.42 | 0.448172 | 0.936 |
| PDZRN3   | -0.42 | 0.448171 | 0.936 |
| PEAR1    | -0.42 | 0.448172 | 0.936 |
| PFDN2    | -0.42 | 0.448171 | 0.936 |
| PLSCR4   | -0.42 | 0.448171 | 0.936 |
| PMS2     | -0.42 | 0.448172 | 0.936 |

|           |       |          |       |
|-----------|-------|----------|-------|
| PPIE      | -0.42 | 0.448171 | 0.936 |
| PTK2      | -0.42 | 0.448171 | 0.936 |
| PVRIG     | -0.42 | 0.471025 | 0.945 |
| SERPINB11 | -0.42 | 0.471025 | 0.945 |
| SF1       | -0.42 | 0.471025 | 0.945 |
| SFRP4     | -0.42 | 0.448172 | 0.936 |
| SLC15A5   | -0.42 | 0.448172 | 0.936 |
| SOD3      | -0.42 | 0.448171 | 0.936 |
| SPRED3    | -0.42 | 0.448172 | 0.936 |
| TAAR2     | -0.42 | 0.448171 | 0.936 |
| TCEAL7    | -0.42 | 0.448172 | 0.936 |
| TEF       | -0.42 | 0.448172 | 0.936 |
| TIGD3     | -0.42 | 0.448172 | 0.936 |
| TJAP1     | -0.42 | 0.471025 | 0.945 |
| TLL2      | -0.42 | 0.448172 | 0.936 |
| TMEM136   | -0.42 | 0.448171 | 0.936 |
| TMEM79    | -0.42 | 0.448172 | 0.936 |
| TMEM89    | -0.42 | 0.448172 | 0.936 |
| TMOD2     | -0.42 | 0.448171 | 0.936 |
| UGT2B15   | -0.42 | 0.448171 | 0.936 |
| VEGFC     | -0.42 | 0.448172 | 0.936 |
| WDR38     | -0.42 | 0.448171 | 0.936 |
| XKR6      | -0.42 | 0.448171 | 0.936 |
| ZHX1-C8OR | -0.42 | 0.448171 | 0.936 |
| ZNF418    | -0.42 | 0.448171 | 0.936 |
| ZNF429    | -0.42 | 0.448172 | 0.936 |
| ZNF44     | -0.42 | 0.448172 | 0.936 |
| ZNF705B   | -0.42 | 0.448172 | 0.936 |
| ZNF708    | -0.42 | 0.448171 | 0.936 |
| ZNF732    | -0.42 | 0.448171 | 0.936 |
| ZNF763    | -0.42 | 0.471025 | 0.945 |
| ZSWIM7    | -0.42 | 0.448172 | 0.936 |
| A4GNT     | -0.41 | 0.458735 | 0.939 |
| ACTR10    | -0.41 | 0.481333 | 0.948 |
| AGAP9     | -0.41 | 0.458734 | 0.939 |
| APBB1     | -0.41 | 0.458735 | 0.939 |
| ARHGAP27  | -0.41 | 0.481333 | 0.948 |
| ARIH1     | -0.41 | 0.458734 | 0.939 |
| ASAP1     | -0.41 | 0.458734 | 0.939 |
| ASIP      | -0.41 | 0.458735 | 0.939 |
| ATF3      | -0.41 | 0.458734 | 0.939 |
| ATG9B     | -0.41 | 0.458735 | 0.939 |
| C12orf56  | -0.41 | 0.458734 | 0.939 |
| C3orf58   | -0.41 | 0.458734 | 0.939 |
| C9orf152  | -0.41 | 0.458734 | 0.939 |
| CACNA1C   | -0.41 | 0.458734 | 0.939 |
| CASD1     | -0.41 | 0.458735 | 0.939 |

|          |       |          |       |
|----------|-------|----------|-------|
| CCDC70   | -0.41 | 0.458734 | 0.939 |
| CD97     | -0.41 | 0.458734 | 0.939 |
| CENPK    | -0.41 | 0.481333 | 0.948 |
| CFAP99   | -0.41 | 0.458734 | 0.939 |
| CHTF8    | -0.41 | 0.458735 | 0.939 |
| CMC4     | -0.41 | 0.50615  | 0.949 |
| COLCA1   | -0.41 | 0.458734 | 0.939 |
| CRB3     | -0.41 | 0.458734 | 0.939 |
| CYP2S1   | -0.41 | 0.458734 | 0.939 |
| EFCC1    | -0.41 | 0.50615  | 0.949 |
| EPS8     | -0.41 | 0.458734 | 0.939 |
| FAM110C  | -0.41 | 0.506149 | 0.949 |
| GMDS     | -0.41 | 0.481333 | 0.948 |
| GNAT2    | -0.41 | 0.481333 | 0.948 |
| GNPTAB   | -0.41 | 0.458734 | 0.939 |
| GOLT1A   | -0.41 | 0.458734 | 0.939 |
| HAND2    | -0.41 | 0.458734 | 0.939 |
| HAO1     | -0.41 | 0.481334 | 0.948 |
| HDAC8    | -0.41 | 0.458735 | 0.939 |
| HPRT1    | -0.41 | 0.481333 | 0.948 |
| KIAA1958 | -0.41 | 0.50615  | 0.949 |
| KLHL1    | -0.41 | 0.458735 | 0.939 |
| KMT2A    | -0.41 | 0.458734 | 0.939 |
| KRT26    | -0.41 | 0.458734 | 0.939 |
| LRFN2    | -0.41 | 0.458734 | 0.939 |
| MAGEA2   | -0.41 | 0.458734 | 0.939 |
| MAP4K3   | -0.41 | 0.458735 | 0.939 |
| MAP7D3   | -0.41 | 0.458735 | 0.939 |
| MKRN2    | -0.41 | 0.458735 | 0.939 |
| MMP14    | -0.41 | 0.481333 | 0.948 |
| NKX2-2   | -0.41 | 0.458735 | 0.939 |
| NPAS4    | -0.41 | 0.458735 | 0.939 |
| NRD1     | -0.41 | 0.458734 | 0.939 |
| OR4F5    | -0.41 | 0.481333 | 0.948 |
| OR51E1   | -0.41 | 0.458734 | 0.939 |
| ORC5     | -0.41 | 0.458735 | 0.939 |
| ORMDL1   | -0.41 | 0.458735 | 0.939 |
| OVGP1    | -0.41 | 0.458734 | 0.939 |
| PABPN1   | -0.41 | 0.481334 | 0.948 |
| PHF12    | -0.41 | 0.458734 | 0.939 |
| PIH1D3   | -0.41 | 0.458734 | 0.939 |
| PITPNM2  | -0.41 | 0.481334 | 0.948 |
| PLD5     | -0.41 | 0.458735 | 0.939 |
| POTEA    | -0.41 | 0.458734 | 0.939 |
| PPP1R3C  | -0.41 | 0.481334 | 0.948 |
| PRICKLE3 | -0.41 | 0.458734 | 0.939 |
| PRPSAP2  | -0.41 | 0.458734 | 0.939 |

|           |       |          |       |
|-----------|-------|----------|-------|
| RAB3B     | -0.41 | 0.458734 | 0.939 |
| RANBP3    | -0.41 | 0.458734 | 0.939 |
| RBFA      | -0.41 | 0.458734 | 0.939 |
| RBMX      | -0.41 | 0.458734 | 0.939 |
| RIPPLY1   | -0.41 | 0.458734 | 0.939 |
| RLN2      | -0.41 | 0.458734 | 0.939 |
| SEC13     | -0.41 | 0.50615  | 0.949 |
| SF3B4     | -0.41 | 0.50615  | 0.949 |
| SFTA2     | -0.41 | 0.481333 | 0.948 |
| SGIP1     | -0.41 | 0.481333 | 0.948 |
| SH2D1A    | -0.41 | 0.458734 | 0.939 |
| SLITRK1   | -0.41 | 0.458734 | 0.939 |
| SOX15     | -0.41 | 0.458734 | 0.939 |
| SPRYD7    | -0.41 | 0.458735 | 0.939 |
| T         | -0.41 | 0.458735 | 0.939 |
| TMEM140   | -0.41 | 0.458735 | 0.939 |
| TMEM180   | -0.41 | 0.458734 | 0.939 |
| TRIM61    | -0.41 | 0.481334 | 0.948 |
| UBB       | -0.41 | 0.458734 | 0.939 |
| UBE2B     | -0.41 | 0.458734 | 0.939 |
| USP47     | -0.41 | 0.458734 | 0.939 |
| WDR49     | -0.41 | 0.458734 | 0.939 |
| WDR64     | -0.41 | 0.458734 | 0.939 |
| ZBED3     | -0.41 | 0.458734 | 0.939 |
| ZDHHC9    | -0.41 | 0.458734 | 0.939 |
| ZNF382    | -0.41 | 0.458734 | 0.939 |
| ZNF606    | -0.41 | 0.458734 | 0.939 |
| ZP1       | -0.41 | 0.458734 | 0.939 |
| AK2       | -0.4  | 0.469499 | 0.944 |
| AKR7A3    | -0.4  | 0.469499 | 0.944 |
| ANAPC5    | -0.4  | 0.469499 | 0.944 |
| B3GNT6    | -0.4  | 0.469499 | 0.944 |
| BAG1      | -0.4  | 0.469499 | 0.944 |
| BRICD5    | -0.4  | 0.469499 | 0.944 |
| C10orf107 | -0.4  | 0.469499 | 0.944 |
| C1QTNF9   | -0.4  | 0.491799 | 0.949 |
| C21orf59  | -0.4  | 0.491799 | 0.949 |
| CABP1     | -0.4  | 0.469499 | 0.944 |
| CAPZA3    | -0.4  | 0.469499 | 0.944 |
| CCK       | -0.4  | 0.469499 | 0.944 |
| CDK18     | -0.4  | 0.469499 | 0.944 |
| CHCHD7    | -0.4  | 0.469499 | 0.944 |
| CNOT10    | -0.4  | 0.469499 | 0.944 |
| CPN2      | -0.4  | 0.469499 | 0.944 |
| CST11     | -0.4  | 0.469499 | 0.944 |
| DHDDS     | -0.4  | 0.516259 | 0.949 |
| DNAJB2    | -0.4  | 0.542515 | 0.955 |

|           |      |          |       |
|-----------|------|----------|-------|
| EIF4EBP3  | -0.4 | 0.469499 | 0.944 |
| ELAC1     | -0.4 | 0.469499 | 0.944 |
| EMR3      | -0.4 | 0.469499 | 0.944 |
| EPS15L1   | -0.4 | 0.469499 | 0.944 |
| ERC2      | -0.4 | 0.469499 | 0.944 |
| ETF1      | -0.4 | 0.469499 | 0.944 |
| FAM199X   | -0.4 | 0.469499 | 0.944 |
| FTMT      | -0.4 | 0.469499 | 0.944 |
| GAS7      | -0.4 | 0.469499 | 0.944 |
| GATA2     | -0.4 | 0.491799 | 0.949 |
| GBA3      | -0.4 | 0.491799 | 0.949 |
| GIMAP8    | -0.4 | 0.469499 | 0.944 |
| GON4L     | -0.4 | 0.491799 | 0.949 |
| GSR       | -0.4 | 0.491799 | 0.949 |
| GSTA1     | -0.4 | 0.469499 | 0.944 |
| GSX1      | -0.4 | 0.491799 | 0.949 |
| HEATR6    | -0.4 | 0.469499 | 0.944 |
| HS6ST2    | -0.4 | 0.469499 | 0.944 |
| ISG20L2   | -0.4 | 0.491799 | 0.949 |
| JAK3      | -0.4 | 0.469499 | 0.944 |
| KANSL1    | -0.4 | 0.491799 | 0.949 |
| KCNQ1     | -0.4 | 0.469499 | 0.944 |
| KIAA0430  | -0.4 | 0.469499 | 0.944 |
| KIF18A    | -0.4 | 0.469499 | 0.944 |
| KIR3DL3   | -0.4 | 0.469499 | 0.944 |
| KLHDC9    | -0.4 | 0.469499 | 0.944 |
| KRTAP23-1 | -0.4 | 0.469499 | 0.944 |
| KRTAP3-2  | -0.4 | 0.469499 | 0.944 |
| KRTAP5-2  | -0.4 | 0.469499 | 0.944 |
| LAMB2     | -0.4 | 0.491799 | 0.949 |
| LCE1D     | -0.4 | 0.469499 | 0.944 |
| LRFN3     | -0.4 | 0.469499 | 0.944 |
| MAGEA2B   | -0.4 | 0.469499 | 0.944 |
| MAGEB17   | -0.4 | 0.469499 | 0.944 |
| MAX       | -0.4 | 0.491799 | 0.949 |
| MRPL15    | -0.4 | 0.491799 | 0.949 |
| MUC16     | -0.4 | 0.469499 | 0.944 |
| NAT8L     | -0.4 | 0.469499 | 0.944 |
| NKIRAS1   | -0.4 | 0.469499 | 0.944 |
| NOXA1     | -0.4 | 0.491799 | 0.949 |
| OR2W5     | -0.4 | 0.469499 | 0.944 |
| OR4D1     | -0.4 | 0.469499 | 0.944 |
| OR6T1     | -0.4 | 0.469499 | 0.944 |
| PLA2G2C   | -0.4 | 0.516259 | 0.949 |
| POLR2E    | -0.4 | 0.516259 | 0.949 |
| PPP3CB    | -0.4 | 0.469499 | 0.944 |
| PRRX2     | -0.4 | 0.469499 | 0.944 |

|          |       |          |       |
|----------|-------|----------|-------|
| PTGES3L  | -0.4  | 0.469499 | 0.944 |
| RAD21L1  | -0.4  | 0.469499 | 0.944 |
| SH2B3    | -0.4  | 0.469499 | 0.944 |
| SLC16A2  | -0.4  | 0.491799 | 0.949 |
| SLC22A13 | -0.4  | 0.469499 | 0.944 |
| STMN1    | -0.4  | 0.469499 | 0.944 |
| TBC1D31  | -0.4  | 0.469499 | 0.944 |
| TCF3     | -0.4  | 0.516258 | 0.949 |
| TMEM63A  | -0.4  | 0.469499 | 0.944 |
| TNFRSF21 | -0.4  | 0.469499 | 0.944 |
| TRMT1L   | -0.4  | 0.469499 | 0.944 |
| TSPAN32  | -0.4  | 0.469499 | 0.944 |
| UBE2A    | -0.4  | 0.469499 | 0.944 |
| USMG5    | -0.4  | 0.639944 | 0.963 |
| UTP23    | -0.4  | 0.469499 | 0.944 |
| WDR77    | -0.4  | 0.491799 | 0.949 |
| ZBTB26   | -0.4  | 0.469499 | 0.944 |
| ZNF578   | -0.4  | 0.469499 | 0.944 |
| ZNF619   | -0.4  | 0.469499 | 0.944 |
| ACHE     | -0.39 | 0.480374 | 0.948 |
| ACP1     | -0.39 | 0.480374 | 0.948 |
| ADAL     | -0.39 | 0.480374 | 0.948 |
| AIG1     | -0.39 | 0.480374 | 0.948 |
| AMELX    | -0.39 | 0.526541 | 0.951 |
| BRCC3    | -0.39 | 0.480374 | 0.948 |
| C1orf110 | -0.39 | 0.480374 | 0.948 |
| C2       | -0.39 | 0.480374 | 0.948 |
| CACTIN   | -0.39 | 0.480374 | 0.948 |
| CDC37L1  | -0.39 | 0.480374 | 0.948 |
| CDYL2    | -0.39 | 0.480374 | 0.948 |
| CEP57L1  | -0.39 | 0.480374 | 0.948 |
| CEP70    | -0.39 | 0.480374 | 0.948 |
| CHRNA4   | -0.39 | 0.480374 | 0.948 |
| CREB3L1  | -0.39 | 0.480374 | 0.948 |
| CTAGE5   | -0.39 | 0.480374 | 0.948 |
| CYP27C1  | -0.39 | 0.480374 | 0.948 |
| DMBT1    | -0.39 | 0.480374 | 0.948 |
| EGFL6    | -0.39 | 0.480374 | 0.948 |
| EMR1     | -0.39 | 0.480374 | 0.948 |
| ESYT2    | -0.39 | 0.480374 | 0.948 |
| FCHO2    | -0.39 | 0.480374 | 0.948 |
| FH       | -0.39 | 0.52654  | 0.951 |
| FLJ45513 | -0.39 | 0.5024   | 0.949 |
| FOXP2    | -0.39 | 0.480374 | 0.948 |
| FZD1     | -0.39 | 0.480374 | 0.948 |
| GINM1    | -0.39 | 0.480374 | 0.948 |
| GLCE     | -0.39 | 0.480374 | 0.948 |

|           |       |          |       |
|-----------|-------|----------|-------|
| GSTA3     | -0.39 | 0.480374 | 0.948 |
| HBQ1      | -0.39 | 0.480374 | 0.948 |
| HERC3     | -0.39 | 0.480374 | 0.948 |
| HNRNPL    | -0.39 | 0.552322 | 0.957 |
| IL1R2     | -0.39 | 0.480374 | 0.948 |
| KRTAP4-11 | -0.39 | 0.5024   | 0.949 |
| LGALS2    | -0.39 | 0.502399 | 0.949 |
| LHFPL4    | -0.39 | 0.480374 | 0.948 |
| LIPC      | -0.39 | 0.480374 | 0.948 |
| MATN1     | -0.39 | 0.480374 | 0.948 |
| MECP2     | -0.39 | 0.480374 | 0.948 |
| METRNL    | -0.39 | 0.480374 | 0.948 |
| NDUFS3    | -0.39 | 0.5024   | 0.949 |
| NOVA1     | -0.39 | 0.480374 | 0.948 |
| OOEP      | -0.39 | 0.480374 | 0.948 |
| OR2B2     | -0.39 | 0.480374 | 0.948 |
| OSCP1     | -0.39 | 0.480374 | 0.948 |
| PABPC1L   | -0.39 | 0.480374 | 0.948 |
| PGLYRP3   | -0.39 | 0.480374 | 0.948 |
| PHF1      | -0.39 | 0.5024   | 0.949 |
| PLA1A     | -0.39 | 0.480374 | 0.948 |
| PLXNB3    | -0.39 | 0.480374 | 0.948 |
| PNMA2     | -0.39 | 0.480374 | 0.948 |
| PTN       | -0.39 | 0.480374 | 0.948 |
| PTPRT     | -0.39 | 0.480374 | 0.948 |
| RAD9A     | -0.39 | 0.5024   | 0.949 |
| RFT1      | -0.39 | 0.5024   | 0.949 |
| RSC1A1    | -0.39 | 0.480374 | 0.948 |
| SAT1      | -0.39 | 0.480374 | 0.948 |
| SCYL3     | -0.39 | 0.480374 | 0.948 |
| SDC1      | -0.39 | 0.480374 | 0.948 |
| SEMA5A    | -0.39 | 0.480374 | 0.948 |
| SERPINF2  | -0.39 | 0.480374 | 0.948 |
| SLC5A6    | -0.39 | 0.480374 | 0.948 |
| SLX4      | -0.39 | 0.480374 | 0.948 |
| SNX25     | -0.39 | 0.480374 | 0.948 |
| SPATA31A3 | -0.39 | 0.480374 | 0.948 |
| SPDYE2    | -0.39 | 0.480374 | 0.948 |
| SPDYE2B   | -0.39 | 0.480374 | 0.948 |
| TAB2      | -0.39 | 0.5024   | 0.949 |
| TAF5      | -0.39 | 0.580773 | 0.957 |
| TCP11X2   | -0.39 | 0.480374 | 0.948 |
| TEX19     | -0.39 | 0.480374 | 0.948 |
| TEX26     | -0.39 | 0.480374 | 0.948 |
| TK1       | -0.39 | 0.480374 | 0.948 |
| TMEM128   | -0.39 | 0.526541 | 0.951 |
| TNFRSF6B  | -0.39 | 0.480374 | 0.948 |

|           |       |          |       |
|-----------|-------|----------|-------|
| TNRC6C    | -0.39 | 0.5024   | 0.949 |
| TRIM74    | -0.39 | 0.502399 | 0.949 |
| TSGA10    | -0.39 | 0.480374 | 0.948 |
| TSPAN9    | -0.39 | 0.480374 | 0.948 |
| TXLNB     | -0.39 | 0.480374 | 0.948 |
| VANGL2    | -0.39 | 0.480374 | 0.948 |
| WNT16     | -0.39 | 0.52654  | 0.951 |
| ZCCHC11   | -0.39 | 0.5024   | 0.949 |
| ZXDA      | -0.39 | 0.480374 | 0.948 |
| ACTR1A    | -0.38 | 0.491394 | 0.949 |
| ACVR1B    | -0.38 | 0.491394 | 0.949 |
| AKAP11    | -0.38 | 0.513155 | 0.949 |
| ANKRD22   | -0.38 | 0.491393 | 0.949 |
| ARHGAP18  | -0.38 | 0.491394 | 0.949 |
| ARMCX6    | -0.38 | 0.491394 | 0.949 |
| ASB2      | -0.38 | 0.513155 | 0.949 |
| ATL3      | -0.38 | 0.491394 | 0.949 |
| ATPAF1    | -0.38 | 0.491394 | 0.949 |
| B3GALT4   | -0.38 | 0.513155 | 0.949 |
| BCAT1     | -0.38 | 0.513155 | 0.949 |
| BOLA2     | -0.38 | 0.513155 | 0.949 |
| BOLA2B    | -0.38 | 0.513155 | 0.949 |
| C10orf128 | -0.38 | 0.491394 | 0.949 |
| C2orf15   | -0.38 | 0.513155 | 0.949 |
| CCDC54    | -0.38 | 0.491394 | 0.949 |
| CDCA7     | -0.38 | 0.491394 | 0.949 |
| CDH15     | -0.38 | 0.513155 | 0.949 |
| CHML      | -0.38 | 0.491393 | 0.949 |
| CLDN5     | -0.38 | 0.513155 | 0.949 |
| COL11A2   | -0.38 | 0.513155 | 0.949 |
| CXorf40B  | -0.38 | 0.491394 | 0.949 |
| CYP26B1   | -0.38 | 0.491394 | 0.949 |
| CYP2R1    | -0.38 | 0.513155 | 0.949 |
| DDAH2     | -0.38 | 0.491394 | 0.949 |
| DDR2      | -0.38 | 0.491394 | 0.949 |
| DEFB127   | -0.38 | 0.491394 | 0.949 |
| DGKD      | -0.38 | 0.491393 | 0.949 |
| DLGAP3    | -0.38 | 0.491394 | 0.949 |
| DNAH11    | -0.38 | 0.491394 | 0.949 |
| DTNA      | -0.38 | 0.491394 | 0.949 |
| EIF4E1B   | -0.38 | 0.513155 | 0.949 |
| ELK1      | -0.38 | 0.491394 | 0.949 |
| ELOVL3    | -0.38 | 0.491394 | 0.949 |
| ESPN      | -0.38 | 0.513154 | 0.949 |
| FAM135A   | -0.38 | 0.491394 | 0.949 |
| FGF7      | -0.38 | 0.513155 | 0.949 |
| FXYP1     | -0.38 | 0.491394 | 0.949 |

|           |       |          |       |
|-----------|-------|----------|-------|
| GALNTL6   | -0.38 | 0.491394 | 0.949 |
| GATAD2B   | -0.38 | 0.491394 | 0.949 |
| GCKR      | -0.38 | 0.491394 | 0.949 |
| GDF7      | -0.38 | 0.491394 | 0.949 |
| GJB1      | -0.38 | 0.513155 | 0.949 |
| GMPR      | -0.38 | 0.491393 | 0.949 |
| GNB1L     | -0.38 | 0.513155 | 0.949 |
| GTF2IRD2  | -0.38 | 0.491394 | 0.949 |
| IRF9      | -0.38 | 0.491394 | 0.949 |
| KBTBD11   | -0.38 | 0.513154 | 0.949 |
| KIAA1755  | -0.38 | 0.513154 | 0.949 |
| KLHL26    | -0.38 | 0.491394 | 0.949 |
| KLHL34    | -0.38 | 0.513155 | 0.949 |
| KRTAP12-3 | -0.38 | 0.491394 | 0.949 |
| KRTAP9-7  | -0.38 | 0.491394 | 0.949 |
| LUM       | -0.38 | 0.491393 | 0.949 |
| MARCH2    | -0.38 | 0.513155 | 0.949 |
| MGARP     | -0.38 | 0.491394 | 0.949 |
| MRPS33    | -0.38 | 0.513155 | 0.949 |
| MT1B      | -0.38 | 0.491394 | 0.949 |
| NRROS     | -0.38 | 0.491394 | 0.949 |
| NYNRIN    | -0.38 | 0.513155 | 0.949 |
| ONECUT2   | -0.38 | 0.491394 | 0.949 |
| OR4C13    | -0.38 | 0.491394 | 0.949 |
| OR4X2     | -0.38 | 0.491393 | 0.949 |
| PAPL      | -0.38 | 0.491394 | 0.949 |
| PARK7     | -0.38 | 0.491394 | 0.949 |
| PARS2     | -0.38 | 0.491394 | 0.949 |
| PDE6G     | -0.38 | 0.491393 | 0.949 |
| PKHD1L1   | -0.38 | 0.513155 | 0.949 |
| PNKP      | -0.38 | 0.562257 | 0.957 |
| PNLIPRP2  | -0.38 | 0.491394 | 0.949 |
| PPIC      | -0.38 | 0.491394 | 0.949 |
| PPP2CA    | -0.38 | 0.491393 | 0.949 |
| RPL38     | -0.38 | 0.536856 | 0.953 |
| SCN4B     | -0.38 | 0.491393 | 0.949 |
| SEMA4B    | -0.38 | 0.491394 | 0.949 |
| SGCB      | -0.38 | 0.491394 | 0.949 |
| SLC30A10  | -0.38 | 0.513155 | 0.949 |
| SLC7A2    | -0.38 | 0.491394 | 0.949 |
| SNX9      | -0.38 | 0.491394 | 0.949 |
| SOCS5     | -0.38 | 0.491394 | 0.949 |
| SOGA3     | -0.38 | 0.513155 | 0.949 |
| SPATA31D3 | -0.38 | 0.491393 | 0.949 |
| SPRYD3    | -0.38 | 0.491394 | 0.949 |
| SSR4      | -0.38 | 0.491394 | 0.949 |
| SYNE2     | -0.38 | 0.491394 | 0.949 |

|           |       |          |       |
|-----------|-------|----------|-------|
| TAAR5     | -0.38 | 0.491394 | 0.949 |
| TBX1      | -0.38 | 0.491394 | 0.949 |
| TIAM2     | -0.38 | 0.491394 | 0.949 |
| TMEM176A  | -0.38 | 0.491394 | 0.949 |
| TMEM51    | -0.38 | 0.491394 | 0.949 |
| TNFSF12   | -0.38 | 0.491394 | 0.949 |
| TRIP4     | -0.38 | 0.491394 | 0.949 |
| TTC17     | -0.38 | 0.491394 | 0.949 |
| USP39     | -0.38 | 0.513155 | 0.949 |
| WAPAL     | -0.38 | 0.536857 | 0.953 |
| YAP1      | -0.38 | 0.491394 | 0.949 |
| YPEL2     | -0.38 | 0.491394 | 0.949 |
| ZBED1     | -0.38 | 0.491394 | 0.949 |
| ZNF259    | -0.38 | 0.513155 | 0.949 |
| ZNF324    | -0.38 | 0.491394 | 0.949 |
| ZNF398    | -0.38 | 0.491394 | 0.949 |
| ADAMTS2   | -0.37 | 0.502471 | 0.949 |
| ADCY4     | -0.37 | 0.50247  | 0.949 |
| ALS2      | -0.37 | 0.523973 | 0.949 |
| ARPC5     | -0.37 | 0.502471 | 0.949 |
| C17orf89  | -0.37 | 0.502471 | 0.949 |
| C1QTNF4   | -0.37 | 0.50247  | 0.949 |
| C7orf61   | -0.37 | 0.523973 | 0.949 |
| CASP4     | -0.37 | 0.502471 | 0.949 |
| CBX7      | -0.37 | 0.502471 | 0.949 |
| CCDC144NL | -0.37 | 0.502471 | 0.949 |
| CCR3      | -0.37 | 0.502471 | 0.949 |
| CD1B      | -0.37 | 0.50247  | 0.949 |
| CD248     | -0.37 | 0.50247  | 0.949 |
| CD34      | -0.37 | 0.523973 | 0.949 |
| CLEC16A   | -0.37 | 0.50247  | 0.949 |
| COL4A1    | -0.37 | 0.50247  | 0.949 |
| CRIPAK    | -0.37 | 0.502471 | 0.949 |
| CUL7      | -0.37 | 0.502471 | 0.949 |
| CYP4F3    | -0.37 | 0.502471 | 0.949 |
| D2HGDH    | -0.37 | 0.502471 | 0.949 |
| DCHS1     | -0.37 | 0.502471 | 0.949 |
| DCN       | -0.37 | 0.502471 | 0.949 |
| DMPK      | -0.37 | 0.50247  | 0.949 |
| DNASE1L3  | -0.37 | 0.54737  | 0.955 |
| DPPA5     | -0.37 | 0.502471 | 0.949 |
| ELOVL7    | -0.37 | 0.502471 | 0.949 |
| EPT1      | -0.37 | 0.502471 | 0.949 |
| ESRRB     | -0.37 | 0.50247  | 0.949 |
| FCRL4     | -0.37 | 0.50247  | 0.949 |
| FMO4      | -0.37 | 0.502471 | 0.949 |
| FNDC3B    | -0.37 | 0.523972 | 0.949 |

|           |       |          |       |
|-----------|-------|----------|-------|
| FOXS1     | -0.37 | 0.523972 | 0.949 |
| GGTLC1    | -0.37 | 0.502471 | 0.949 |
| GPR171    | -0.37 | 0.502471 | 0.949 |
| GPSM3     | -0.37 | 0.523973 | 0.949 |
| HAGHL     | -0.37 | 0.502471 | 0.949 |
| HIRIP3    | -0.37 | 0.502471 | 0.949 |
| HIST2H2AC | -0.37 | 0.502471 | 0.949 |
| HLA-DPB1  | -0.37 | 0.502471 | 0.949 |
| JAG2      | -0.37 | 0.523973 | 0.949 |
| KIDINS220 | -0.37 | 0.502471 | 0.949 |
| KRT4      | -0.37 | 0.502471 | 0.949 |
| KRTAP4-2  | -0.37 | 0.523972 | 0.949 |
| LGALS16   | -0.37 | 0.502471 | 0.949 |
| LSM1      | -0.37 | 0.50247  | 0.949 |
| MAGEA8    | -0.37 | 0.523973 | 0.949 |
| MARK3     | -0.37 | 0.523972 | 0.949 |
| MRAS      | -0.37 | 0.523973 | 0.949 |
| MRPL27    | -0.37 | 0.502471 | 0.949 |
| MSTO1     | -0.37 | 0.523973 | 0.949 |
| MUS81     | -0.37 | 0.523973 | 0.949 |
| MYF5      | -0.37 | 0.523973 | 0.949 |
| MYO3B     | -0.37 | 0.50247  | 0.949 |
| MYPOP     | -0.37 | 0.502471 | 0.949 |
| NCAPH2    | -0.37 | 0.50247  | 0.949 |
| NDUFAF1   | -0.37 | 0.50247  | 0.949 |
| OR2L8     | -0.37 | 0.50247  | 0.949 |
| OR2T27    | -0.37 | 0.50247  | 0.949 |
| OR4K17    | -0.37 | 0.502471 | 0.949 |
| OR6N2     | -0.37 | 0.50247  | 0.949 |
| PACSIN1   | -0.37 | 0.502471 | 0.949 |
| PCDHA11   | -0.37 | 0.502471 | 0.949 |
| PGAM5     | -0.37 | 0.50247  | 0.949 |
| PHLDB1    | -0.37 | 0.523973 | 0.949 |
| PTER      | -0.37 | 0.523972 | 0.949 |
| PXMP2     | -0.37 | 0.50247  | 0.949 |
| RBM15B    | -0.37 | 0.50247  | 0.949 |
| RHBDF1    | -0.37 | 0.50247  | 0.949 |
| RMI1      | -0.37 | 0.502471 | 0.949 |
| RNF145    | -0.37 | 0.502471 | 0.949 |
| RNF187    | -0.37 | 0.523973 | 0.949 |
| RUSC1-AS1 | -0.37 | 0.523972 | 0.949 |
| SCFD2     | -0.37 | 0.50247  | 0.949 |
| SCGB1D4   | -0.37 | 0.50247  | 0.949 |
| SCNM1     | -0.37 | 0.502471 | 0.949 |
| SLC24A2   | -0.37 | 0.523973 | 0.949 |
| SLC2A14   | -0.37 | 0.502471 | 0.949 |
| SMARCC1   | -0.37 | 0.523973 | 0.949 |

|          |       |          |       |
|----------|-------|----------|-------|
| SORT1    | -0.37 | 0.50247  | 0.949 |
| SPC24    | -0.37 | 0.630383 | 0.962 |
| SRRD     | -0.37 | 0.502471 | 0.949 |
| ST6GAL1  | -0.37 | 0.502471 | 0.949 |
| TECPR2   | -0.37 | 0.502471 | 0.949 |
| THAP2    | -0.37 | 0.50247  | 0.949 |
| TM4SF5   | -0.37 | 0.50247  | 0.949 |
| TMEM109  | -0.37 | 0.502471 | 0.949 |
| TMEM222  | -0.37 | 0.502471 | 0.949 |
| TMEM229B | -0.37 | 0.502471 | 0.949 |
| TMPRSS9  | -0.37 | 0.502471 | 0.949 |
| TMX3     | -0.37 | 0.50247  | 0.949 |
| TRAM1L1  | -0.37 | 0.502471 | 0.949 |
| TRAPPC1  | -0.37 | 0.502471 | 0.949 |
| TSN      | -0.37 | 0.502471 | 0.949 |
| UBE2I    | -0.37 | 0.523973 | 0.949 |
| WDHD1    | -0.37 | 0.502471 | 0.949 |
| WDR83    | -0.37 | 0.502471 | 0.949 |
| YARS     | -0.37 | 0.523973 | 0.949 |
| ZBTB7A   | -0.37 | 0.502471 | 0.949 |
| ZIM3     | -0.37 | 0.50247  | 0.949 |
| ZNF223   | -0.37 | 0.50247  | 0.949 |
| ZNF730   | -0.37 | 0.523973 | 0.949 |
| ACY1     | -0.36 | 0.513719 | 0.949 |
| ANO4     | -0.36 | 0.513719 | 0.949 |
| ATP6V0A2 | -0.36 | 0.535    | 0.953 |
| BGLAP    | -0.36 | 0.535    | 0.953 |
| BNC2     | -0.36 | 0.513719 | 0.949 |
| C10orf71 | -0.36 | 0.513719 | 0.949 |
| C11orf31 | -0.36 | 0.513719 | 0.949 |
| C1orf95  | -0.36 | 0.513719 | 0.949 |
| C4BPA    | -0.36 | 0.51372  | 0.949 |
| C7orf76  | -0.36 | 0.513719 | 0.949 |
| CCP110   | -0.36 | 0.513719 | 0.949 |
| CDKN2A   | -0.36 | 0.535    | 0.953 |
| CHRNE    | -0.36 | 0.51372  | 0.949 |
| CLDN12   | -0.36 | 0.513719 | 0.949 |
| CLDN22   | -0.36 | 0.51372  | 0.949 |
| CLN5     | -0.36 | 0.513719 | 0.949 |
| COL27A1  | -0.36 | 0.513719 | 0.949 |
| CRP      | -0.36 | 0.513719 | 0.949 |
| CST3     | -0.36 | 0.513719 | 0.949 |
| CUTC     | -0.36 | 0.513719 | 0.949 |
| CXorf67  | -0.36 | 0.51372  | 0.949 |
| CYP2C8   | -0.36 | 0.513719 | 0.949 |
| DCAF8L2  | -0.36 | 0.513719 | 0.949 |
| DIS3L2   | -0.36 | 0.513719 | 0.949 |

|           |       |          |       |
|-----------|-------|----------|-------|
| DOLPP1    | -0.36 | 0.513719 | 0.949 |
| DYRK1A    | -0.36 | 0.513719 | 0.949 |
| EFCAB12   | -0.36 | 0.513719 | 0.949 |
| FAM110B   | -0.36 | 0.513719 | 0.949 |
| FAM189A2  | -0.36 | 0.513719 | 0.949 |
| FAM227A   | -0.36 | 0.535001 | 0.953 |
| FBXW7     | -0.36 | 0.513719 | 0.949 |
| FCAR      | -0.36 | 0.513719 | 0.949 |
| FETUB     | -0.36 | 0.51372  | 0.949 |
| FLNA      | -0.36 | 0.513719 | 0.949 |
| GPR6      | -0.36 | 0.535    | 0.953 |
| GPX6      | -0.36 | 0.51372  | 0.949 |
| HOXC6     | -0.36 | 0.513719 | 0.949 |
| HSPB2     | -0.36 | 0.513719 | 0.949 |
| IGSF5     | -0.36 | 0.51372  | 0.949 |
| IL27RA    | -0.36 | 0.51372  | 0.949 |
| IL6       | -0.36 | 0.513719 | 0.949 |
| KCNIP3    | -0.36 | 0.513719 | 0.949 |
| KIAA1841  | -0.36 | 0.513719 | 0.949 |
| KLHL7     | -0.36 | 0.535    | 0.953 |
| KLRB1     | -0.36 | 0.513719 | 0.949 |
| KRTAP25-1 | -0.36 | 0.535    | 0.953 |
| LAMTOR4   | -0.36 | 0.513719 | 0.949 |
| MAMDC4    | -0.36 | 0.513719 | 0.949 |
| MBLAC1    | -0.36 | 0.51372  | 0.949 |
| METTL20   | -0.36 | 0.513719 | 0.949 |
| MEX3C     | -0.36 | 0.55798  | 0.957 |
| MINPP1    | -0.36 | 0.513719 | 0.949 |
| NEFH      | -0.36 | 0.513719 | 0.949 |
| NEU3      | -0.36 | 0.513719 | 0.949 |
| NKX1-1    | -0.36 | 0.51372  | 0.949 |
| NUPL2     | -0.36 | 0.513719 | 0.949 |
| OPN1MW    | -0.36 | 0.513719 | 0.949 |
| OR1J1     | -0.36 | 0.51372  | 0.949 |
| OR52A5    | -0.36 | 0.513719 | 0.949 |
| OR5M8     | -0.36 | 0.513719 | 0.949 |
| OSCAR     | -0.36 | 0.51372  | 0.949 |
| PDLIM3    | -0.36 | 0.513719 | 0.949 |
| PDRG1     | -0.36 | 0.513719 | 0.949 |
| PKP3      | -0.36 | 0.51372  | 0.949 |
| PLEKHB1   | -0.36 | 0.513719 | 0.949 |
| PNLIPRP3  | -0.36 | 0.513719 | 0.949 |
| PNPLA1    | -0.36 | 0.51372  | 0.949 |
| PPP4R1    | -0.36 | 0.535    | 0.953 |
| PSD       | -0.36 | 0.513719 | 0.949 |
| PTGR2     | -0.36 | 0.513719 | 0.949 |
| QARS      | -0.36 | 0.582435 | 0.957 |

|           |       |          |       |
|-----------|-------|----------|-------|
| RAB11FIP1 | -0.36 | 0.535    | 0.953 |
| RAD50     | -0.36 | 0.513719 | 0.949 |
| RADIL     | -0.36 | 0.513719 | 0.949 |
| RNASE9    | -0.36 | 0.513719 | 0.949 |
| RPS23     | -0.36 | 0.513719 | 0.949 |
| RUSC1     | -0.36 | 0.513719 | 0.949 |
| SNRPN     | -0.36 | 0.535    | 0.953 |
| SOCS6     | -0.36 | 0.513719 | 0.949 |
| SPATA31A6 | -0.36 | 0.513719 | 0.949 |
| SPATA9    | -0.36 | 0.513719 | 0.949 |
| SPEG      | -0.36 | 0.513719 | 0.949 |
| STX18     | -0.36 | 0.513719 | 0.949 |
| TBX22     | -0.36 | 0.513719 | 0.949 |
| TDRD6     | -0.36 | 0.513719 | 0.949 |
| TMEM14C   | -0.36 | 0.513719 | 0.949 |
| TMEM229A  | -0.36 | 0.513719 | 0.949 |
| TRNT1     | -0.36 | 0.535    | 0.953 |
| TXNRD3NB  | -0.36 | 0.513719 | 0.949 |
| UBQLN2    | -0.36 | 0.513719 | 0.949 |
| UBXN1     | -0.36 | 0.535    | 0.953 |
| VASH2     | -0.36 | 0.51372  | 0.949 |
| ZDHHC7    | -0.36 | 0.513719 | 0.949 |
| ZNF131    | -0.36 | 0.513719 | 0.949 |
| ZNF232    | -0.36 | 0.513719 | 0.949 |
| ZNF416    | -0.36 | 0.51372  | 0.949 |
| ZNF648    | -0.36 | 0.513719 | 0.949 |
| ZBPB2     | -0.36 | 0.513719 | 0.949 |
| ABR       | -0.35 | 0.525142 | 0.949 |
| AHCY      | -0.35 | 0.525142 | 0.949 |
| ALDH1A3   | -0.35 | 0.525142 | 0.949 |
| AMY2B     | -0.35 | 0.525142 | 0.949 |
| AQP7      | -0.35 | 0.525142 | 0.949 |
| ATG7      | -0.35 | 0.525142 | 0.949 |
| B3GAT2    | -0.35 | 0.546066 | 0.955 |
| BOD1L2    | -0.35 | 0.525142 | 0.949 |
| C12orf74  | -0.35 | 0.525142 | 0.949 |
| CAPN12    | -0.35 | 0.525142 | 0.949 |
| CCL26     | -0.35 | 0.546066 | 0.955 |
| CDK3      | -0.35 | 0.525142 | 0.949 |
| CENPH     | -0.35 | 0.525142 | 0.949 |
| CENPV     | -0.35 | 0.546066 | 0.955 |
| CEP170B   | -0.35 | 0.525142 | 0.949 |
| CHD2      | -0.35 | 0.525142 | 0.949 |
| CSK       | -0.35 | 0.546065 | 0.955 |
| CST9L     | -0.35 | 0.525142 | 0.949 |
| CXXC5     | -0.35 | 0.525142 | 0.949 |
| CYP21A2   | -0.35 | 0.525142 | 0.949 |

|          |       |          |       |
|----------|-------|----------|-------|
| EHBP1    | -0.35 | 0.525142 | 0.949 |
| EIF1B    | -0.35 | 0.525142 | 0.949 |
| EIF4E    | -0.35 | 0.525142 | 0.949 |
| EME2     | -0.35 | 0.525142 | 0.949 |
| F13A1    | -0.35 | 0.546066 | 0.955 |
| FAM175B  | -0.35 | 0.546065 | 0.955 |
| FAM181B  | -0.35 | 0.525142 | 0.949 |
| FAM217B  | -0.35 | 0.546066 | 0.955 |
| FAM53A   | -0.35 | 0.525142 | 0.949 |
| FAM71C   | -0.35 | 0.525142 | 0.949 |
| FLG      | -0.35 | 0.525142 | 0.949 |
| FUT6     | -0.35 | 0.525142 | 0.949 |
| GADD45A  | -0.35 | 0.525141 | 0.949 |
| GAL3ST3  | -0.35 | 0.525142 | 0.949 |
| GATSL1   | -0.35 | 0.546066 | 0.955 |
| GLI1     | -0.35 | 0.525141 | 0.949 |
| GYS1     | -0.35 | 0.525142 | 0.949 |
| HMGB4    | -0.35 | 0.525142 | 0.949 |
| HOXC5    | -0.35 | 0.525142 | 0.949 |
| ICOS     | -0.35 | 0.525142 | 0.949 |
| IL15RA   | -0.35 | 0.525142 | 0.949 |
| IQCF5    | -0.35 | 0.546066 | 0.955 |
| ITGB1BP2 | -0.35 | 0.525142 | 0.949 |
| KRR1     | -0.35 | 0.546066 | 0.955 |
| L3MBTL4  | -0.35 | 0.525142 | 0.949 |
| LAMA1    | -0.35 | 0.525142 | 0.949 |
| LCE5A    | -0.35 | 0.525142 | 0.949 |
| LRGUK    | -0.35 | 0.525142 | 0.949 |
| LRRC7    | -0.35 | 0.525141 | 0.949 |
| MAGEB16  | -0.35 | 0.525142 | 0.949 |
| MAGIX    | -0.35 | 0.525142 | 0.949 |
| MAPRE2   | -0.35 | 0.525141 | 0.949 |
| MPZL2    | -0.35 | 0.525142 | 0.949 |
| MRPS10   | -0.35 | 0.525142 | 0.949 |
| MT3      | -0.35 | 0.525142 | 0.949 |
| MTMR14   | -0.35 | 0.525142 | 0.949 |
| MYH2     | -0.35 | 0.546066 | 0.955 |
| MYOZ1    | -0.35 | 0.546066 | 0.955 |
| NBPF10   | -0.35 | 0.546066 | 0.955 |
| NFAT5    | -0.35 | 0.525142 | 0.949 |
| NRSN1    | -0.35 | 0.525142 | 0.949 |
| NSMCE2   | -0.35 | 0.525142 | 0.949 |
| NUDCD2   | -0.35 | 0.525141 | 0.949 |
| OR51I2   | -0.35 | 0.525142 | 0.949 |
| PAGE1    | -0.35 | 0.525142 | 0.949 |
| PARK2    | -0.35 | 0.525141 | 0.949 |
| PDZD9    | -0.35 | 0.525142 | 0.949 |

|          |       |          |       |
|----------|-------|----------|-------|
| PHB      | -0.35 | 0.59258  | 0.957 |
| PLSCR3   | -0.35 | 0.546066 | 0.955 |
| POLR3A   | -0.35 | 0.525142 | 0.949 |
| POTEJ    | -0.35 | 0.546066 | 0.955 |
| POU3F4   | -0.35 | 0.525142 | 0.949 |
| PPCDC    | -0.35 | 0.525142 | 0.949 |
| PPIF     | -0.35 | 0.525142 | 0.949 |
| PPP1CB   | -0.35 | 0.568695 | 0.957 |
| PRKG2    | -0.35 | 0.546066 | 0.955 |
| PRL      | -0.35 | 0.546066 | 0.955 |
| RB1      | -0.35 | 0.525142 | 0.949 |
| RB1CC1   | -0.35 | 0.546066 | 0.955 |
| RPF2     | -0.35 | 0.525142 | 0.949 |
| SAMD7    | -0.35 | 0.525142 | 0.949 |
| SBSPON   | -0.35 | 0.525141 | 0.949 |
| SDCCAG3  | -0.35 | 0.525142 | 0.949 |
| SLC26A4  | -0.35 | 0.525142 | 0.949 |
| SLC30A3  | -0.35 | 0.525142 | 0.949 |
| SLC32A1  | -0.35 | 0.525141 | 0.949 |
| SNRPC    | -0.35 | 0.568695 | 0.957 |
| SOX6     | -0.35 | 0.546066 | 0.955 |
| SOX9     | -0.35 | 0.525142 | 0.949 |
| SPATA24  | -0.35 | 0.525142 | 0.949 |
| SPDEF    | -0.35 | 0.525142 | 0.949 |
| SPRY4    | -0.35 | 0.525141 | 0.949 |
| STON2    | -0.35 | 0.525142 | 0.949 |
| SUMF2    | -0.35 | 0.525142 | 0.949 |
| TAF15    | -0.35 | 0.568695 | 0.957 |
| TAL2     | -0.35 | 0.525142 | 0.949 |
| TGIF2LY  | -0.35 | 0.525142 | 0.949 |
| THAP10   | -0.35 | 0.525141 | 0.949 |
| THRSP    | -0.35 | 0.525142 | 0.949 |
| TM9SF4   | -0.35 | 0.525141 | 0.949 |
| TMCC1    | -0.35 | 0.525142 | 0.949 |
| TMEM126A | -0.35 | 0.525142 | 0.949 |
| TMEM165  | -0.35 | 0.525142 | 0.949 |
| TMEM169  | -0.35 | 0.525142 | 0.949 |
| TMEM68   | -0.35 | 0.525142 | 0.949 |
| TMEM70   | -0.35 | 0.525142 | 0.949 |
| TPPP3    | -0.35 | 0.546066 | 0.955 |
| TRIM69   | -0.35 | 0.525141 | 0.949 |
| TTLL6    | -0.35 | 0.525142 | 0.949 |
| TVP23B   | -0.35 | 0.525142 | 0.949 |
| VKORC1   | -0.35 | 0.525142 | 0.949 |
| VOPP1    | -0.35 | 0.525142 | 0.949 |
| WDR47    | -0.35 | 0.525142 | 0.949 |
| XRCC4    | -0.35 | 0.525142 | 0.949 |

|           |       |          |       |
|-----------|-------|----------|-------|
| ZNF419    | -0.35 | 0.525142 | 0.949 |
| ZNF621    | -0.35 | 0.525141 | 0.949 |
| ZNF669    | -0.35 | 0.525142 | 0.949 |
| ZXDB      | -0.35 | 0.525142 | 0.949 |
| ADAM28    | -0.34 | 0.53671  | 0.953 |
| ANKEF1    | -0.34 | 0.53671  | 0.953 |
| ARHGAP1   | -0.34 | 0.55721  | 0.957 |
| ATP1A4    | -0.34 | 0.53671  | 0.953 |
| AUH       | -0.34 | 0.536709 | 0.953 |
| C10orf11  | -0.34 | 0.53671  | 0.953 |
| C14orf37  | -0.34 | 0.53671  | 0.953 |
| C15orf27  | -0.34 | 0.536709 | 0.953 |
| C1orf233  | -0.34 | 0.53671  | 0.953 |
| C5orf45   | -0.34 | 0.557211 | 0.957 |
| CCDC87    | -0.34 | 0.536709 | 0.953 |
| CER1      | -0.34 | 0.53671  | 0.953 |
| CTSF      | -0.34 | 0.53671  | 0.953 |
| CTTNBP2   | -0.34 | 0.536709 | 0.953 |
| DCAF6     | -0.34 | 0.53671  | 0.953 |
| DYSF      | -0.34 | 0.53671  | 0.953 |
| E2F4      | -0.34 | 0.53671  | 0.953 |
| EFNA3     | -0.34 | 0.536709 | 0.953 |
| EHD3      | -0.34 | 0.536709 | 0.953 |
| ERVMER34- | -0.34 | 0.536709 | 0.953 |
| ESR1      | -0.34 | 0.536709 | 0.953 |
| FAM124B   | -0.34 | 0.53671  | 0.953 |
| FMOD      | -0.34 | 0.53671  | 0.953 |
| GFRA1     | -0.34 | 0.536709 | 0.953 |
| GNAT1     | -0.34 | 0.536709 | 0.953 |
| GNB5      | -0.34 | 0.53671  | 0.953 |
| GPC4      | -0.34 | 0.536709 | 0.953 |
| HMCN2     | -0.34 | 0.536709 | 0.953 |
| JAK2      | -0.34 | 0.536709 | 0.953 |
| JDP2      | -0.34 | 0.53671  | 0.953 |
| KBTBD12   | -0.34 | 0.53671  | 0.953 |
| LINS      | -0.34 | 0.536709 | 0.953 |
| LIPK      | -0.34 | 0.536709 | 0.953 |
| LRRC46    | -0.34 | 0.536709 | 0.953 |
| MAGED4B   | -0.34 | 0.53671  | 0.953 |
| METTL2A   | -0.34 | 0.536709 | 0.953 |
| MICAL2    | -0.34 | 0.536709 | 0.953 |
| MYEOV2    | -0.34 | 0.536709 | 0.953 |
| NCOA2     | -0.34 | 0.536709 | 0.953 |
| NSL1      | -0.34 | 0.53671  | 0.953 |
| PARP4     | -0.34 | 0.536709 | 0.953 |
| PGA3      | -0.34 | 0.536709 | 0.953 |
| PHRF1     | -0.34 | 0.53671  | 0.953 |

|          |       |          |       |
|----------|-------|----------|-------|
| PLA2G10  | -0.34 | 0.536709 | 0.953 |
| PRC1     | -0.34 | 0.536709 | 0.953 |
| PSMB9    | -0.34 | 0.536709 | 0.953 |
| RPIA     | -0.34 | 0.536709 | 0.953 |
| SCGB3A1  | -0.34 | 0.536709 | 0.953 |
| SESTD1   | -0.34 | 0.536709 | 0.953 |
| SIX6     | -0.34 | 0.536709 | 0.953 |
| SLC22A12 | -0.34 | 0.536709 | 0.953 |
| SLC2A3   | -0.34 | 0.53671  | 0.953 |
| SLC35C2  | -0.34 | 0.536709 | 0.953 |
| SLC35F2  | -0.34 | 0.53671  | 0.953 |
| SLC38A5  | -0.34 | 0.536709 | 0.953 |
| SLC39A7  | -0.34 | 0.55721  | 0.957 |
| SMARCA2  | -0.34 | 0.536709 | 0.953 |
| SPCS1    | -0.34 | 0.579388 | 0.957 |
| SPPL2C   | -0.34 | 0.53671  | 0.953 |
| SRF      | -0.34 | 0.536709 | 0.953 |
| STARD10  | -0.34 | 0.536709 | 0.953 |
| SULT1A2  | -0.34 | 0.53671  | 0.953 |
| SURF2    | -0.34 | 0.55721  | 0.957 |
| SUV39H1  | -0.34 | 0.53671  | 0.953 |
| TM7SF3   | -0.34 | 0.536709 | 0.953 |
| TMEM107  | -0.34 | 0.53671  | 0.953 |
| TMEM19   | -0.34 | 0.53671  | 0.953 |
| TRIM59   | -0.34 | 0.536709 | 0.953 |
| TSPY2    | -0.34 | 0.579388 | 0.957 |
| TYW1     | -0.34 | 0.53671  | 0.953 |
| UGT8     | -0.34 | 0.536709 | 0.953 |
| USP51    | -0.34 | 0.579388 | 0.957 |
| VIP      | -0.34 | 0.53671  | 0.953 |
| VMAC     | -0.34 | 0.53671  | 0.953 |
| VPS4A    | -0.34 | 0.536709 | 0.953 |
| WSCD1    | -0.34 | 0.536709 | 0.953 |
| ZNF514   | -0.34 | 0.536709 | 0.953 |
| ZNF582   | -0.34 | 0.536709 | 0.953 |
| ZNF626   | -0.34 | 0.53671  | 0.953 |
| ZNF71    | -0.34 | 0.536709 | 0.953 |
| ZNF79    | -0.34 | 0.53671  | 0.953 |
| ACTR1B   | -0.33 | 0.548343 | 0.955 |
| ADCK2    | -0.33 | 0.548343 | 0.955 |
| AEBP1    | -0.33 | 0.548344 | 0.955 |
| ALPK1    | -0.33 | 0.548343 | 0.955 |
| ARHGAP29 | -0.33 | 0.548343 | 0.955 |
| ASAP3    | -0.33 | 0.548343 | 0.955 |
| ASTN2    | -0.33 | 0.548343 | 0.955 |
| B3GALT1  | -0.33 | 0.548343 | 0.955 |
| BCCIP    | -0.33 | 0.568521 | 0.957 |

|           |       |          |       |
|-----------|-------|----------|-------|
| BCL11B    | -0.33 | 0.548343 | 0.955 |
| BTN3A1    | -0.33 | 0.548343 | 0.955 |
| C15orf53  | -0.33 | 0.548344 | 0.955 |
| C17orf58  | -0.33 | 0.548344 | 0.955 |
| C20orf112 | -0.33 | 0.568521 | 0.957 |
| C3orf70   | -0.33 | 0.568521 | 0.957 |
| C4orf3    | -0.33 | 0.548343 | 0.955 |
| C9orf169  | -0.33 | 0.548344 | 0.955 |
| CARD8     | -0.33 | 0.548343 | 0.955 |
| CCR7      | -0.33 | 0.548343 | 0.955 |
| CKAP2L    | -0.33 | 0.548344 | 0.955 |
| CPNE7     | -0.33 | 0.548343 | 0.955 |
| CST8      | -0.33 | 0.548344 | 0.955 |
| CT45A4    | -0.33 | 0.548343 | 0.955 |
| CTAGE15   | -0.33 | 0.548344 | 0.955 |
| CYBA      | -0.33 | 0.568521 | 0.957 |
| DBR1      | -0.33 | 0.59014  | 0.957 |
| DCAF12L2  | -0.33 | 0.548344 | 0.955 |
| DDX39A    | -0.33 | 0.548343 | 0.955 |
| DSPP      | -0.33 | 0.548343 | 0.955 |
| FAM216A   | -0.33 | 0.548343 | 0.955 |
| FAM76B    | -0.33 | 0.548344 | 0.955 |
| FLRT2     | -0.33 | 0.568521 | 0.957 |
| FSTL3     | -0.33 | 0.568521 | 0.957 |
| GAS2L1    | -0.33 | 0.568521 | 0.957 |
| GGCX      | -0.33 | 0.548344 | 0.955 |
| GHSR      | -0.33 | 0.548343 | 0.955 |
| GOLGB1    | -0.33 | 0.548343 | 0.955 |
| HIST1H2BH | -0.33 | 0.568521 | 0.957 |
| HTR2C     | -0.33 | 0.548343 | 0.955 |
| IFLTD1    | -0.33 | 0.548343 | 0.955 |
| KDM2B     | -0.33 | 0.59014  | 0.957 |
| KL        | -0.33 | 0.568521 | 0.957 |
| KRTAP20-2 | -0.33 | 0.548344 | 0.955 |
| KRTAP8-1  | -0.33 | 0.548343 | 0.955 |
| LGMN      | -0.33 | 0.548343 | 0.955 |
| LOC389602 | -0.33 | 0.548344 | 0.955 |
| MAGED4    | -0.33 | 0.548343 | 0.955 |
| MAST2     | -0.33 | 0.548343 | 0.955 |
| MEGF6     | -0.33 | 0.548343 | 0.955 |
| MFGE8     | -0.33 | 0.568521 | 0.957 |
| MPC1      | -0.33 | 0.548344 | 0.955 |
| MTFR1     | -0.33 | 0.548343 | 0.955 |
| NEUROD2   | -0.33 | 0.548344 | 0.955 |
| NMNAT1    | -0.33 | 0.548343 | 0.955 |
| OGDHL     | -0.33 | 0.548344 | 0.955 |
| OR2T29    | -0.33 | 0.548344 | 0.955 |

|           |       |          |       |
|-----------|-------|----------|-------|
| OR4M1     | -0.33 | 0.548344 | 0.955 |
| PAPD5     | -0.33 | 0.548343 | 0.955 |
| PCDHB1    | -0.33 | 0.548343 | 0.955 |
| PDE5A     | -0.33 | 0.548343 | 0.955 |
| PGAP1     | -0.33 | 0.548343 | 0.955 |
| PIGZ      | -0.33 | 0.548343 | 0.955 |
| PKN1      | -0.33 | 0.548344 | 0.955 |
| PLG       | -0.33 | 0.548344 | 0.955 |
| PON3      | -0.33 | 0.548344 | 0.955 |
| PRICKLE1  | -0.33 | 0.548344 | 0.955 |
| PROKR2    | -0.33 | 0.568521 | 0.957 |
| RAD51B    | -0.33 | 0.568521 | 0.957 |
| REEP5     | -0.33 | 0.548343 | 0.955 |
| RP9       | -0.33 | 0.548344 | 0.955 |
| SBK1      | -0.33 | 0.568521 | 0.957 |
| SCT       | -0.33 | 0.548344 | 0.955 |
| SELENBP1  | -0.33 | 0.548344 | 0.955 |
| SLAMF9    | -0.33 | 0.548344 | 0.955 |
| SLC4A9    | -0.33 | 0.548343 | 0.955 |
| SLC9A5    | -0.33 | 0.548344 | 0.955 |
| SPATA31C2 | -0.33 | 0.548343 | 0.955 |
| SUMO1     | -0.33 | 0.613216 | 0.961 |
| SYT5      | -0.33 | 0.548344 | 0.955 |
| TAGLN2    | -0.33 | 0.548343 | 0.955 |
| TAS2R1    | -0.33 | 0.548344 | 0.955 |
| TBCA      | -0.33 | 0.548343 | 0.955 |
| TEX28     | -0.33 | 0.548344 | 0.955 |
| TEX37     | -0.33 | 0.548344 | 0.955 |
| TLK2      | -0.33 | 0.548344 | 0.955 |
| TNFAIP6   | -0.33 | 0.548343 | 0.955 |
| UCP3      | -0.33 | 0.548343 | 0.955 |
| VAMP7     | -0.33 | 0.548343 | 0.955 |
| WBP2NL    | -0.33 | 0.548344 | 0.955 |
| WDR13     | -0.33 | 0.548343 | 0.955 |
| ZBED4     | -0.33 | 0.568521 | 0.957 |
| ZBTB7B    | -0.33 | 0.59014  | 0.957 |
| ZFP42     | -0.33 | 0.548343 | 0.955 |
| ZFR       | -0.33 | 0.59014  | 0.957 |
| ZKSCAN8   | -0.33 | 0.548344 | 0.955 |
| ZNF479    | -0.33 | 0.548343 | 0.955 |
| ZNF692    | -0.33 | 0.548343 | 0.955 |
| ZNF729    | -0.33 | 0.548343 | 0.955 |
| ABHD13    | -0.32 | 0.560159 | 0.957 |
| AIM1L     | -0.32 | 0.56016  | 0.957 |
| ANGPT4    | -0.32 | 0.560159 | 0.957 |
| ANKMY2    | -0.32 | 0.560159 | 0.957 |
| ANKRD13D  | -0.32 | 0.560159 | 0.957 |

|          |       |          |       |
|----------|-------|----------|-------|
| ARHGEF9  | -0.32 | 0.56016  | 0.957 |
| ARRB1    | -0.32 | 0.56016  | 0.957 |
| ATP11B   | -0.32 | 0.56016  | 0.957 |
| ATP13A4  | -0.32 | 0.560159 | 0.957 |
| BAI2     | -0.32 | 0.579871 | 0.957 |
| BCL6     | -0.32 | 0.560159 | 0.957 |
| BORA     | -0.32 | 0.579871 | 0.957 |
| BPIFA3   | -0.32 | 0.56016  | 0.957 |
| C1orf101 | -0.32 | 0.56016  | 0.957 |
| C1orf50  | -0.32 | 0.56016  | 0.957 |
| C9orf117 | -0.32 | 0.56016  | 0.957 |
| CAP1     | -0.32 | 0.56016  | 0.957 |
| CAPSL    | -0.32 | 0.56016  | 0.957 |
| CASR     | -0.32 | 0.56016  | 0.957 |
| CCDC109B | -0.32 | 0.56016  | 0.957 |
| CCND3    | -0.32 | 0.623746 | 0.962 |
| CDRT15   | -0.32 | 0.560159 | 0.957 |
| COTL1    | -0.32 | 0.56016  | 0.957 |
| CXorf57  | -0.32 | 0.560159 | 0.957 |
| DDOST    | -0.32 | 0.56016  | 0.957 |
| DDX39B   | -0.32 | 0.56016  | 0.957 |
| DDX42    | -0.32 | 0.56016  | 0.957 |
| DLEC1    | -0.32 | 0.579871 | 0.957 |
| DNM3     | -0.32 | 0.560159 | 0.957 |
| EBLN2    | -0.32 | 0.56016  | 0.957 |
| ECSIT    | -0.32 | 0.560159 | 0.957 |
| EPS8L2   | -0.32 | 0.560159 | 0.957 |
| ERBB2    | -0.32 | 0.560159 | 0.957 |
| ESF1     | -0.32 | 0.579871 | 0.957 |
| ETFDH    | -0.32 | 0.560159 | 0.957 |
| FAM101A  | -0.32 | 0.56016  | 0.957 |
| FAM69B   | -0.32 | 0.560159 | 0.957 |
| FBLIM1   | -0.32 | 0.560159 | 0.957 |
| FBXO3    | -0.32 | 0.579871 | 0.957 |
| FBXW2    | -0.32 | 0.560159 | 0.957 |
| FLCN     | -0.32 | 0.579871 | 0.957 |
| FOXG1    | -0.32 | 0.601098 | 0.96  |
| FRA10AC1 | -0.32 | 0.56016  | 0.957 |
| GAGE12H  | -0.32 | 0.623747 | 0.962 |
| GFRA2    | -0.32 | 0.579872 | 0.957 |
| GOLGA6A  | -0.32 | 0.560159 | 0.957 |
| GPC5     | -0.32 | 0.560159 | 0.957 |
| GPR113   | -0.32 | 0.56016  | 0.957 |
| GPR18    | -0.32 | 0.56016  | 0.957 |
| GPRIN1   | -0.32 | 0.56016  | 0.957 |
| GSTT2B   | -0.32 | 0.560159 | 0.957 |
| GUCA1A   | -0.32 | 0.560159 | 0.957 |

|          |       |          |       |
|----------|-------|----------|-------|
| GUCY2C   | -0.32 | 0.560159 | 0.957 |
| H3F3C    | -0.32 | 0.56016  | 0.957 |
| HCFC1    | -0.32 | 0.623746 | 0.962 |
| HID1     | -0.32 | 0.560159 | 0.957 |
| HOXC10   | -0.32 | 0.601098 | 0.96  |
| HSPA4L   | -0.32 | 0.56016  | 0.957 |
| IFT80    | -0.32 | 0.56016  | 0.957 |
| IKZF4    | -0.32 | 0.56016  | 0.957 |
| IL22RA2  | -0.32 | 0.56016  | 0.957 |
| ITGA7    | -0.32 | 0.560159 | 0.957 |
| ITPRIP   | -0.32 | 0.579871 | 0.957 |
| KCNN4    | -0.32 | 0.579871 | 0.957 |
| KLF9     | -0.32 | 0.579872 | 0.957 |
| KLK12    | -0.32 | 0.56016  | 0.957 |
| KRT72    | -0.32 | 0.56016  | 0.957 |
| KRTAP1-1 | -0.32 | 0.579871 | 0.957 |
| LAS1L    | -0.32 | 0.601098 | 0.96  |
| LCA5L    | -0.32 | 0.579871 | 0.957 |
| LFNG     | -0.32 | 0.56016  | 0.957 |
| LRRC15   | -0.32 | 0.56016  | 0.957 |
| LRRC59   | -0.32 | 0.579872 | 0.957 |
| LSR      | -0.32 | 0.579871 | 0.957 |
| MAMSTR   | -0.32 | 0.560159 | 0.957 |
| MBD3L3   | -0.32 | 0.560159 | 0.957 |
| MKNK2    | -0.32 | 0.560159 | 0.957 |
| MPP2     | -0.32 | 0.56016  | 0.957 |
| MTHFD1   | -0.32 | 0.601098 | 0.96  |
| MUC3A    | -0.32 | 0.56016  | 0.957 |
| MUC4     | -0.32 | 0.56016  | 0.957 |
| NIPAL1   | -0.32 | 0.560159 | 0.957 |
| NIT2     | -0.32 | 0.56016  | 0.957 |
| OSTM1    | -0.32 | 0.56016  | 0.957 |
| PANK2    | -0.32 | 0.560159 | 0.957 |
| PKD2     | -0.32 | 0.579871 | 0.957 |
| PLEKHF2  | -0.32 | 0.579871 | 0.957 |
| PMCH     | -0.32 | 0.560159 | 0.957 |
| PPP3R1   | -0.32 | 0.56016  | 0.957 |
| PPT2     | -0.32 | 0.560159 | 0.957 |
| PROK2    | -0.32 | 0.579871 | 0.957 |
| PSMG4    | -0.32 | 0.560159 | 0.957 |
| QRFPR    | -0.32 | 0.560159 | 0.957 |
| RIAD1    | -0.32 | 0.560159 | 0.957 |
| RNF111   | -0.32 | 0.56016  | 0.957 |
| RNF34    | -0.32 | 0.56016  | 0.957 |
| RNLS     | -0.32 | 0.56016  | 0.957 |
| SERPINA3 | -0.32 | 0.560159 | 0.957 |
| SIK2     | -0.32 | 0.579871 | 0.957 |

|           |       |          |       |
|-----------|-------|----------|-------|
| SLC22A18A | -0.32 | 0.560159 | 0.957 |
| SOGA1     | -0.32 | 0.56016  | 0.957 |
| SPANXB1   | -0.32 | 0.560159 | 0.957 |
| SPG7      | -0.32 | 0.56016  | 0.957 |
| SS18L1    | -0.32 | 0.56016  | 0.957 |
| SSR1      | -0.32 | 0.560159 | 0.957 |
| STPG2     | -0.32 | 0.560159 | 0.957 |
| STX5      | -0.32 | 0.601098 | 0.96  |
| TATDN2    | -0.32 | 0.579872 | 0.957 |
| TDRD10    | -0.32 | 0.560159 | 0.957 |
| TEX15     | -0.32 | 0.56016  | 0.957 |
| TFF3      | -0.32 | 0.579871 | 0.957 |
| TIGD6     | -0.32 | 0.56016  | 0.957 |
| TMEM178A  | -0.32 | 0.56016  | 0.957 |
| TMEM179   | -0.32 | 0.560159 | 0.957 |
| TPK1      | -0.32 | 0.56016  | 0.957 |
| UBE2D4    | -0.32 | 0.560159 | 0.957 |
| UPRT      | -0.32 | 0.560159 | 0.957 |
| ZIC2      | -0.32 | 0.579871 | 0.957 |
| ZNF33B    | -0.32 | 0.56016  | 0.957 |
| ZNF600    | -0.32 | 0.560159 | 0.957 |
| ZNF93     | -0.32 | 0.56016  | 0.957 |
| AADAT     | -0.31 | 0.572016 | 0.957 |
| ABHD6     | -0.31 | 0.572016 | 0.957 |
| ANAPC10   | -0.31 | 0.572016 | 0.957 |
| ANLN      | -0.31 | 0.572016 | 0.957 |
| APOD      | -0.31 | 0.572015 | 0.957 |
| ARHGAP23  | -0.31 | 0.572016 | 0.957 |
| ATP6V1B1  | -0.31 | 0.572016 | 0.957 |
| BMPR2     | -0.31 | 0.572016 | 0.957 |
| BRI3      | -0.31 | 0.591468 | 0.957 |
| BTN2A1    | -0.31 | 0.591467 | 0.957 |
| C11orf54  | -0.31 | 0.572016 | 0.957 |
| C1RL      | -0.31 | 0.572015 | 0.957 |
| C8orf37   | -0.31 | 0.572015 | 0.957 |
| CCDC65    | -0.31 | 0.572016 | 0.957 |
| CD14      | -0.31 | 0.572016 | 0.957 |
| CDK4      | -0.31 | 0.572016 | 0.957 |
| CHRM2     | -0.31 | 0.572015 | 0.957 |
| CLDN17    | -0.31 | 0.572016 | 0.957 |
| CRAT      | -0.31 | 0.572016 | 0.957 |
| CRCP      | -0.31 | 0.591467 | 0.957 |
| CT45A3    | -0.31 | 0.572015 | 0.957 |
| CTSZ      | -0.31 | 0.572016 | 0.957 |
| CYP2J2    | -0.31 | 0.572016 | 0.957 |
| DAAM2     | -0.31 | 0.572016 | 0.957 |
| DEFB134   | -0.31 | 0.572015 | 0.957 |

|          |       |          |       |
|----------|-------|----------|-------|
| DHDH     | -0.31 | 0.572015 | 0.957 |
| DLG5     | -0.31 | 0.572016 | 0.957 |
| DNAH17   | -0.31 | 0.591467 | 0.957 |
| DSE      | -0.31 | 0.591468 | 0.957 |
| E2F1     | -0.31 | 0.591468 | 0.957 |
| ECT2L    | -0.31 | 0.572016 | 0.957 |
| ELF3     | -0.31 | 0.572015 | 0.957 |
| EPHA6    | -0.31 | 0.572016 | 0.957 |
| EPHA8    | -0.31 | 0.572016 | 0.957 |
| ERC1     | -0.31 | 0.591467 | 0.957 |
| ERICH1   | -0.31 | 0.572016 | 0.957 |
| ERLIN1   | -0.31 | 0.572016 | 0.957 |
| EXD2     | -0.31 | 0.572016 | 0.957 |
| FAM198B  | -0.31 | 0.572016 | 0.957 |
| FAM205A  | -0.31 | 0.572016 | 0.957 |
| FAM211A  | -0.31 | 0.572016 | 0.957 |
| FUBP3    | -0.31 | 0.572015 | 0.957 |
| GBP7     | -0.31 | 0.572015 | 0.957 |
| GBX2     | -0.31 | 0.591467 | 0.957 |
| GLTSCR1  | -0.31 | 0.591468 | 0.957 |
| GPR84    | -0.31 | 0.591467 | 0.957 |
| GTF2F2   | -0.31 | 0.572016 | 0.957 |
| GTPBP4   | -0.31 | 0.591468 | 0.957 |
| HAS3     | -0.31 | 0.572016 | 0.957 |
| HMHA1    | -0.31 | 0.591467 | 0.957 |
| HSD17B13 | -0.31 | 0.572016 | 0.957 |
| IDI2     | -0.31 | 0.591467 | 0.957 |
| IFI27L2  | -0.31 | 0.572016 | 0.957 |
| IGFALS   | -0.31 | 0.572016 | 0.957 |
| IGSF8    | -0.31 | 0.572016 | 0.957 |
| JAM3     | -0.31 | 0.572016 | 0.957 |
| KCNJ11   | -0.31 | 0.572016 | 0.957 |
| KIAA0355 | -0.31 | 0.572016 | 0.957 |
| LDB3     | -0.31 | 0.572016 | 0.957 |
| LDLRAD1  | -0.31 | 0.572016 | 0.957 |
| LGSN     | -0.31 | 0.572016 | 0.957 |
| MAFK     | -0.31 | 0.591467 | 0.957 |
| MBD1     | -0.31 | 0.612099 | 0.961 |
| MFSD2A   | -0.31 | 0.572016 | 0.957 |
| MLF2     | -0.31 | 0.572016 | 0.957 |
| MRFAP1   | -0.31 | 0.572016 | 0.957 |
| MRPL42   | -0.31 | 0.572016 | 0.957 |
| MSC      | -0.31 | 0.572016 | 0.957 |
| NDUFAF4  | -0.31 | 0.572016 | 0.957 |
| NLRC4    | -0.31 | 0.572016 | 0.957 |
| NOMO1    | -0.31 | 0.591468 | 0.957 |
| NPIPA2   | -0.31 | 0.658247 | 0.967 |

|          |       |          |       |
|----------|-------|----------|-------|
| NRSN2    | -0.31 | 0.572015 | 0.957 |
| NTNG2    | -0.31 | 0.572016 | 0.957 |
| OAS3     | -0.31 | 0.591468 | 0.957 |
| PCDHA6   | -0.31 | 0.572015 | 0.957 |
| PCSK1N   | -0.31 | 0.572015 | 0.957 |
| PCSK5    | -0.31 | 0.572015 | 0.957 |
| PGBD4    | -0.31 | 0.572016 | 0.957 |
| PHTF2    | -0.31 | 0.572015 | 0.957 |
| PIAS4    | -0.31 | 0.572016 | 0.957 |
| PINX1    | -0.31 | 0.572016 | 0.957 |
| RALB     | -0.31 | 0.572016 | 0.957 |
| RALGPS2  | -0.31 | 0.572016 | 0.957 |
| RBM27    | -0.31 | 0.591468 | 0.957 |
| RBM39    | -0.31 | 0.634367 | 0.963 |
| REEP6    | -0.31 | 0.572016 | 0.957 |
| RNF38    | -0.31 | 0.572016 | 0.957 |
| RPS6KL1  | -0.31 | 0.591467 | 0.957 |
| SCN5A    | -0.31 | 0.572016 | 0.957 |
| SERTM1   | -0.31 | 0.572016 | 0.957 |
| SHB      | -0.31 | 0.612099 | 0.961 |
| SLC25A41 | -0.31 | 0.572016 | 0.957 |
| SLC4A1   | -0.31 | 0.612099 | 0.961 |
| SLC4A11  | -0.31 | 0.572016 | 0.957 |
| ST3GAL5  | -0.31 | 0.572016 | 0.957 |
| TACSTD2  | -0.31 | 0.572016 | 0.957 |
| TARS2    | -0.31 | 0.572016 | 0.957 |
| TBX20    | -0.31 | 0.572016 | 0.957 |
| TEAD3    | -0.31 | 0.572016 | 0.957 |
| TEKT4    | -0.31 | 0.572016 | 0.957 |
| TINAG    | -0.31 | 0.572016 | 0.957 |
| TMEM131  | -0.31 | 0.591468 | 0.957 |
| TMEM156  | -0.31 | 0.572016 | 0.957 |
| TMEM239  | -0.31 | 0.591467 | 0.957 |
| TPM4     | -0.31 | 0.572016 | 0.957 |
| TPT1     | -0.31 | 0.572015 | 0.957 |
| TRIM48   | -0.31 | 0.572016 | 0.957 |
| TRIM49B  | -0.31 | 0.612099 | 0.961 |
| UPK1B    | -0.31 | 0.572016 | 0.957 |
| USP38    | -0.31 | 0.572015 | 0.957 |
| UTF1     | -0.31 | 0.591468 | 0.957 |
| UTP15    | -0.31 | 0.591467 | 0.957 |
| VAMP2    | -0.31 | 0.572016 | 0.957 |
| VNN2     | -0.31 | 0.572016 | 0.957 |
| WTAP     | -0.31 | 0.612099 | 0.961 |
| XCL1     | -0.31 | 0.572016 | 0.957 |
| ZCCHC24  | -0.31 | 0.572016 | 0.957 |
| ZNF165   | -0.31 | 0.572016 | 0.957 |

|          |       |          |       |
|----------|-------|----------|-------|
| ZNF320   | -0.31 | 0.591467 | 0.957 |
| ZNF335   | -0.31 | 0.612099 | 0.961 |
| ZNF354C  | -0.31 | 0.572015 | 0.957 |
| ADAD2    | -0.3  | 0.584027 | 0.957 |
| ADCY3    | -0.3  | 0.623278 | 0.962 |
| ADRBK2   | -0.3  | 0.584027 | 0.957 |
| API5     | -0.3  | 0.584027 | 0.957 |
| APLN     | -0.3  | 0.584027 | 0.957 |
| ARHGEF19 | -0.3  | 0.584027 | 0.957 |
| ARSE     | -0.3  | 0.584027 | 0.957 |
| ASB5     | -0.3  | 0.584027 | 0.957 |
| ASZ1     | -0.3  | 0.584027 | 0.957 |
| BHLHA9   | -0.3  | 0.584027 | 0.957 |
| C11orf24 | -0.3  | 0.584027 | 0.957 |
| C16orf71 | -0.3  | 0.584027 | 0.957 |
| C2orf73  | -0.3  | 0.584027 | 0.957 |
| C7orf49  | -0.3  | 0.584027 | 0.957 |
| CAV1     | -0.3  | 0.584027 | 0.957 |
| CCDC157  | -0.3  | 0.584027 | 0.957 |
| CD46     | -0.3  | 0.584027 | 0.957 |
| CDC123   | -0.3  | 0.603061 | 0.96  |
| CELA3A   | -0.3  | 0.584027 | 0.957 |
| CHCHD4   | -0.3  | 0.584027 | 0.957 |
| CLCN7    | -0.3  | 0.584027 | 0.957 |
| CLU      | -0.3  | 0.584027 | 0.957 |
| CNDP2    | -0.3  | 0.584027 | 0.957 |
| COX10    | -0.3  | 0.603061 | 0.96  |
| COX7C    | -0.3  | 0.584027 | 0.957 |
| DAOA     | -0.3  | 0.584027 | 0.957 |
| DCTPP1   | -0.3  | 0.584027 | 0.957 |
| DCUN1D4  | -0.3  | 0.584026 | 0.957 |
| DEFB124  | -0.3  | 0.584027 | 0.957 |
| DEGS1    | -0.3  | 0.584027 | 0.957 |
| DHFRL1   | -0.3  | 0.584027 | 0.957 |
| DHRS4L1  | -0.3  | 0.644989 | 0.963 |
| DKKL1    | -0.3  | 0.584026 | 0.957 |
| DNMT3B   | -0.3  | 0.584027 | 0.957 |
| DPCR1    | -0.3  | 0.584027 | 0.957 |
| EPHX2    | -0.3  | 0.584026 | 0.957 |
| FAM167B  | -0.3  | 0.623277 | 0.962 |
| FOXA3    | -0.3  | 0.584027 | 0.957 |
| FOXC1    | -0.3  | 0.603061 | 0.96  |
| FRAT1    | -0.3  | 0.584027 | 0.957 |
| GJC3     | -0.3  | 0.584027 | 0.957 |
| GNB2     | -0.3  | 0.584027 | 0.957 |
| GPR119   | -0.3  | 0.584027 | 0.957 |
| GPR45    | -0.3  | 0.584026 | 0.957 |

|          |      |          |       |
|----------|------|----------|-------|
| GRIK1    | -0.3 | 0.584027 | 0.957 |
| GYG1     | -0.3 | 0.584027 | 0.957 |
| HAAO     | -0.3 | 0.584027 | 0.957 |
| HBS1L    | -0.3 | 0.584027 | 0.957 |
| HEG1     | -0.3 | 0.623278 | 0.962 |
| HSD11B2  | -0.3 | 0.584027 | 0.957 |
| HSPBP1   | -0.3 | 0.584027 | 0.957 |
| HTR3E    | -0.3 | 0.584027 | 0.957 |
| IFI44    | -0.3 | 0.584026 | 0.957 |
| IL10RB   | -0.3 | 0.584027 | 0.957 |
| ITLN2    | -0.3 | 0.584027 | 0.957 |
| KIAA0195 | -0.3 | 0.584027 | 0.957 |
| KIAA1984 | -0.3 | 0.584027 | 0.957 |
| KRT35    | -0.3 | 0.603061 | 0.96  |
| LAMB3    | -0.3 | 0.584027 | 0.957 |
| LANCL2   | -0.3 | 0.623277 | 0.962 |
| LRRC41   | -0.3 | 0.584027 | 0.957 |
| MIS18A   | -0.3 | 0.584027 | 0.957 |
| MROH7    | -0.3 | 0.603061 | 0.96  |
| MS4A6A   | -0.3 | 0.584027 | 0.957 |
| MYCBP    | -0.3 | 0.584027 | 0.957 |
| MYT1     | -0.3 | 0.584027 | 0.957 |
| NDFIP2   | -0.3 | 0.584026 | 0.957 |
| NDP      | -0.3 | 0.584027 | 0.957 |
| NECAP1   | -0.3 | 0.584027 | 0.957 |
| NFATC2IP | -0.3 | 0.584026 | 0.957 |
| NUFIP1   | -0.3 | 0.584026 | 0.957 |
| OR11L1   | -0.3 | 0.584026 | 0.957 |
| OR1D2    | -0.3 | 0.584027 | 0.957 |
| OR51B4   | -0.3 | 0.584027 | 0.957 |
| PDLIM5   | -0.3 | 0.584027 | 0.957 |
| PELO     | -0.3 | 0.603061 | 0.96  |
| PGAP3    | -0.3 | 0.584027 | 0.957 |
| PGM5     | -0.3 | 0.584027 | 0.957 |
| PNMT     | -0.3 | 0.584027 | 0.957 |
| PPP1R21  | -0.3 | 0.584027 | 0.957 |
| PPP6R3   | -0.3 | 0.603062 | 0.96  |
| PRELID2  | -0.3 | 0.584027 | 0.957 |
| PSMB7    | -0.3 | 0.603062 | 0.96  |
| RAB20    | -0.3 | 0.584027 | 0.957 |
| RAB32    | -0.3 | 0.584027 | 0.957 |
| RAPGEF5  | -0.3 | 0.584027 | 0.957 |
| RGPD4    | -0.3 | 0.603062 | 0.96  |
| RNASE10  | -0.3 | 0.584026 | 0.957 |
| RNASET2  | -0.3 | 0.584027 | 0.957 |
| RND2     | -0.3 | 0.584027 | 0.957 |
| SH3RF2   | -0.3 | 0.584027 | 0.957 |

|           |       |          |       |
|-----------|-------|----------|-------|
| SIRPB1    | -0.3  | 0.584027 | 0.957 |
| SLC25A30  | -0.3  | 0.584027 | 0.957 |
| SLC26A7   | -0.3  | 0.584027 | 0.957 |
| SLC38A11  | -0.3  | 0.584026 | 0.957 |
| SLC52A3   | -0.3  | 0.584027 | 0.957 |
| SOAT1     | -0.3  | 0.584026 | 0.957 |
| SRP72     | -0.3  | 0.584026 | 0.957 |
| ST8SIA5   | -0.3  | 0.603061 | 0.96  |
| STXBP4    | -0.3  | 0.584026 | 0.957 |
| TMEM175   | -0.3  | 0.584027 | 0.957 |
| TMEM262   | -0.3  | 0.584027 | 0.957 |
| TRAPPC6A  | -0.3  | 0.584027 | 0.957 |
| TRDN      | -0.3  | 0.584027 | 0.957 |
| TUSC2     | -0.3  | 0.584027 | 0.957 |
| UBE2E2    | -0.3  | 0.584027 | 0.957 |
| UBP1      | -0.3  | 0.584027 | 0.957 |
| AP4E1     | -0.29 | 0.596204 | 0.957 |
| ARHGAP9   | -0.29 | 0.614758 | 0.961 |
| ARL5A     | -0.29 | 0.596205 | 0.957 |
| ARMC7     | -0.29 | 0.614758 | 0.961 |
| ASAH2     | -0.29 | 0.596204 | 0.957 |
| ASB7      | -0.29 | 0.596205 | 0.957 |
| BIVM      | -0.29 | 0.596205 | 0.957 |
| C15orf59  | -0.29 | 0.596205 | 0.957 |
| C16orf70  | -0.29 | 0.614758 | 0.961 |
| C1orf131  | -0.29 | 0.614758 | 0.961 |
| C4orf51   | -0.29 | 0.596205 | 0.957 |
| CAPZB     | -0.29 | 0.596205 | 0.957 |
| CD2       | -0.29 | 0.596204 | 0.957 |
| CD226     | -0.29 | 0.596204 | 0.957 |
| CDKN2AIPN | -0.29 | 0.596204 | 0.957 |
| CHMP2B    | -0.29 | 0.596204 | 0.957 |
| CLEC2L    | -0.29 | 0.596204 | 0.957 |
| CLRN3     | -0.29 | 0.596204 | 0.957 |
| CLSTN1    | -0.29 | 0.596204 | 0.957 |
| CPT1A     | -0.29 | 0.596204 | 0.957 |
| CXorf22   | -0.29 | 0.596204 | 0.957 |
| CYP2C18   | -0.29 | 0.614758 | 0.961 |
| DDX31     | -0.29 | 0.596205 | 0.957 |
| DEGS2     | -0.29 | 0.596205 | 0.957 |
| DEPDC5    | -0.29 | 0.596205 | 0.957 |
| DGKQ      | -0.29 | 0.596205 | 0.957 |
| DPPA3     | -0.29 | 0.596205 | 0.957 |
| E2F5      | -0.29 | 0.596205 | 0.957 |
| EFNA1     | -0.29 | 0.596204 | 0.957 |
| EIF1AX    | -0.29 | 0.614758 | 0.961 |
| ELMO3     | -0.29 | 0.596204 | 0.957 |

|           |       |          |       |
|-----------|-------|----------|-------|
| EME1      | -0.29 | 0.596204 | 0.957 |
| ENPP2     | -0.29 | 0.634525 | 0.963 |
| FBN1      | -0.29 | 0.614758 | 0.961 |
| FEZF1     | -0.29 | 0.596204 | 0.957 |
| FGF12     | -0.29 | 0.596204 | 0.957 |
| FITM2     | -0.29 | 0.596205 | 0.957 |
| FKBP11    | -0.29 | 0.596204 | 0.957 |
| FKBP2     | -0.29 | 0.614757 | 0.961 |
| FRMD8     | -0.29 | 0.596205 | 0.957 |
| FZD3      | -0.29 | 0.614758 | 0.961 |
| GFER      | -0.29 | 0.614758 | 0.961 |
| GIGYF2    | -0.29 | 0.634525 | 0.963 |
| GIMAP4    | -0.29 | 0.596204 | 0.957 |
| GMNN      | -0.29 | 0.596204 | 0.957 |
| GPX8      | -0.29 | 0.596204 | 0.957 |
| GSK3A     | -0.29 | 0.596205 | 0.957 |
| GTF2H2    | -0.29 | 0.596205 | 0.957 |
| GUCY1A2   | -0.29 | 0.596205 | 0.957 |
| H2AFV     | -0.29 | 0.596205 | 0.957 |
| H3F3B     | -0.29 | 0.614758 | 0.961 |
| HGF       | -0.29 | 0.614758 | 0.961 |
| HTR3A     | -0.29 | 0.596204 | 0.957 |
| HYI       | -0.29 | 0.596205 | 0.957 |
| IGFBP7    | -0.29 | 0.596204 | 0.957 |
| IPP       | -0.29 | 0.596205 | 0.957 |
| IQSEC2    | -0.29 | 0.596204 | 0.957 |
| KIAA0907  | -0.29 | 0.596204 | 0.957 |
| KRTAP21-2 | -0.29 | 0.596204 | 0.957 |
| LCE2A     | -0.29 | 0.596205 | 0.957 |
| LOC147646 | -0.29 | 0.596205 | 0.957 |
| LOC650293 | -0.29 | 0.634525 | 0.963 |
| LRRC36    | -0.29 | 0.596205 | 0.957 |
| METTL13   | -0.29 | 0.596205 | 0.957 |
| MGAT3     | -0.29 | 0.596205 | 0.957 |
| MMADHC    | -0.29 | 0.596204 | 0.957 |
| MTCP1     | -0.29 | 0.596204 | 0.957 |
| MTDH      | -0.29 | 0.596204 | 0.957 |
| MYEOV     | -0.29 | 0.614758 | 0.961 |
| NEURL1B   | -0.29 | 0.596204 | 0.957 |
| NTF4      | -0.29 | 0.614758 | 0.961 |
| NUDT3     | -0.29 | 0.596204 | 0.957 |
| OARD1     | -0.29 | 0.596205 | 0.957 |
| OR14J1    | -0.29 | 0.596205 | 0.957 |
| OR3A1     | -0.29 | 0.596205 | 0.957 |
| OVCH2     | -0.29 | 0.614757 | 0.961 |
| P2RX4     | -0.29 | 0.614757 | 0.961 |
| PAGE2B    | -0.29 | 0.596205 | 0.957 |

|          |       |          |       |
|----------|-------|----------|-------|
| PCDHGB4  | -0.29 | 0.614758 | 0.961 |
| PDDC1    | -0.29 | 0.596204 | 0.957 |
| PDLIM7   | -0.29 | 0.596204 | 0.957 |
| PDSS1    | -0.29 | 0.614757 | 0.961 |
| PIGP     | -0.29 | 0.596204 | 0.957 |
| PNCK     | -0.29 | 0.596204 | 0.957 |
| POLR3C   | -0.29 | 0.596205 | 0.957 |
| POMT2    | -0.29 | 0.614758 | 0.961 |
| POP7     | -0.29 | 0.596205 | 0.957 |
| PPP2R3B  | -0.29 | 0.596205 | 0.957 |
| PRAMEF14 | -0.29 | 0.596204 | 0.957 |
| PRG2     | -0.29 | 0.596204 | 0.957 |
| PRPF31   | -0.29 | 0.65563  | 0.967 |
| PRPH2    | -0.29 | 0.596205 | 0.957 |
| PYGM     | -0.29 | 0.596205 | 0.957 |
| RECK     | -0.29 | 0.596204 | 0.957 |
| RPH3A    | -0.29 | 0.596204 | 0.957 |
| RPS6KA1  | -0.29 | 0.596204 | 0.957 |
| RPS6KA2  | -0.29 | 0.596204 | 0.957 |
| RUNX2    | -0.29 | 0.634525 | 0.963 |
| SAR1B    | -0.29 | 0.596205 | 0.957 |
| SLC22A16 | -0.29 | 0.596205 | 0.957 |
| SMR3B    | -0.29 | 0.634525 | 0.963 |
| SNAPC4   | -0.29 | 0.614758 | 0.961 |
| SPRR1B   | -0.29 | 0.596204 | 0.957 |
| STOML1   | -0.29 | 0.596205 | 0.957 |
| SUMO4    | -0.29 | 0.596205 | 0.957 |
| SYBU     | -0.29 | 0.596204 | 0.957 |
| TBX2     | -0.29 | 0.596205 | 0.957 |
| TCF20    | -0.29 | 0.596204 | 0.957 |
| TESPA1   | -0.29 | 0.596205 | 0.957 |
| THRAP3   | -0.29 | 0.634525 | 0.963 |
| TMEM159  | -0.29 | 0.614758 | 0.961 |
| TMEM203  | -0.29 | 0.596204 | 0.957 |
| TNFSF4   | -0.29 | 0.596205 | 0.957 |
| TRAF6    | -0.29 | 0.596204 | 0.957 |
| TRMT10B  | -0.29 | 0.596204 | 0.957 |
| TSHZ2    | -0.29 | 0.614758 | 0.961 |
| UBAP1L   | -0.29 | 0.614757 | 0.961 |
| UBL4A    | -0.29 | 0.596205 | 0.957 |
| USP50    | -0.29 | 0.596204 | 0.957 |
| VAMP3    | -0.29 | 0.596204 | 0.957 |
| VCAN     | -0.29 | 0.596204 | 0.957 |
| VHL      | -0.29 | 0.596204 | 0.957 |
| WDR25    | -0.29 | 0.614758 | 0.961 |
| XPA      | -0.29 | 0.596204 | 0.957 |
| ZNF518B  | -0.29 | 0.596204 | 0.957 |

|          |       |          |       |
|----------|-------|----------|-------|
| ZNF620   | -0.29 | 0.596205 | 0.957 |
| ABHD17C  | -0.28 | 0.6266   | 0.962 |
| ADRB2    | -0.28 | 0.608465 | 0.96  |
| APCDD1L  | -0.28 | 0.608465 | 0.96  |
| ATP5L2   | -0.28 | 0.608465 | 0.96  |
| BBS9     | -0.28 | 0.608464 | 0.96  |
| BRCA1    | -0.28 | 0.6266   | 0.962 |
| BST2     | -0.28 | 0.608464 | 0.96  |
| C12orf71 | -0.28 | 0.6266   | 0.962 |
| C16orf82 | -0.28 | 0.645781 | 0.963 |
| C6orf120 | -0.28 | 0.608465 | 0.96  |
| C7orf34  | -0.28 | 0.608464 | 0.96  |
| C9orf66  | -0.28 | 0.608465 | 0.96  |
| CALU     | -0.28 | 0.608465 | 0.96  |
| CD163L1  | -0.28 | 0.608465 | 0.96  |
| CDNF     | -0.28 | 0.608465 | 0.96  |
| CHIC2    | -0.28 | 0.6266   | 0.962 |
| CLDN23   | -0.28 | 0.608465 | 0.96  |
| CLVS1    | -0.28 | 0.608465 | 0.96  |
| CNST     | -0.28 | 0.608465 | 0.96  |
| COX7B2   | -0.28 | 0.608464 | 0.96  |
| CRABP1   | -0.28 | 0.608465 | 0.96  |
| CXCR6    | -0.28 | 0.608465 | 0.96  |
| DBNL     | -0.28 | 0.608465 | 0.96  |
| DENND6B  | -0.28 | 0.608465 | 0.96  |
| ELOVL4   | -0.28 | 0.608465 | 0.96  |
| ERMAP    | -0.28 | 0.626599 | 0.962 |
| FAM84A   | -0.28 | 0.608465 | 0.96  |
| FBXL2    | -0.28 | 0.608465 | 0.96  |
| FBXO7    | -0.28 | 0.608465 | 0.96  |
| GLIPR2   | -0.28 | 0.608464 | 0.96  |
| GSE1     | -0.28 | 0.608465 | 0.96  |
| GYPA     | -0.28 | 0.608465 | 0.96  |
| HAT1     | -0.28 | 0.6266   | 0.962 |
| HIGD1A   | -0.28 | 0.608465 | 0.96  |
| HIST1H1D | -0.28 | 0.608465 | 0.96  |
| HMCN1    | -0.28 | 0.608464 | 0.96  |
| IGBP1    | -0.28 | 0.645781 | 0.963 |
| IGFLR1   | -0.28 | 0.608465 | 0.96  |
| IL17C    | -0.28 | 0.608465 | 0.96  |
| IL17D    | -0.28 | 0.608465 | 0.96  |
| IMPDH1   | -0.28 | 0.608464 | 0.96  |
| IRX6     | -0.28 | 0.6266   | 0.962 |
| KRT25    | -0.28 | 0.608465 | 0.96  |
| KRT76    | -0.28 | 0.608465 | 0.96  |
| LBX2     | -0.28 | 0.6266   | 0.962 |
| LMNB2    | -0.28 | 0.608465 | 0.96  |

|           |       |          |       |
|-----------|-------|----------|-------|
| MAT1A     | -0.28 | 0.608465 | 0.96  |
| MC2R      | -0.28 | 0.608465 | 0.96  |
| MED1      | -0.28 | 0.64578  | 0.963 |
| MGP       | -0.28 | 0.608464 | 0.96  |
| MRAP      | -0.28 | 0.608465 | 0.96  |
| MRGPRF    | -0.28 | 0.608465 | 0.96  |
| MYO15A    | -0.28 | 0.608465 | 0.96  |
| NDUFS8    | -0.28 | 0.608464 | 0.96  |
| NELFE     | -0.28 | 0.608465 | 0.96  |
| NEUROD6   | -0.28 | 0.6266   | 0.962 |
| NHS       | -0.28 | 0.608465 | 0.96  |
| NKD1      | -0.28 | 0.608465 | 0.96  |
| OR1I1     | -0.28 | 0.608465 | 0.96  |
| OR2A2     | -0.28 | 0.608465 | 0.96  |
| OR2A7     | -0.28 | 0.626599 | 0.962 |
| OR2G6     | -0.28 | 0.608464 | 0.96  |
| P2RX6     | -0.28 | 0.608465 | 0.96  |
| PAQR5     | -0.28 | 0.608465 | 0.96  |
| PDX1      | -0.28 | 0.608465 | 0.96  |
| PECR      | -0.28 | 0.608464 | 0.96  |
| PID1      | -0.28 | 0.608465 | 0.96  |
| PKN3      | -0.28 | 0.608465 | 0.96  |
| PLCXD3    | -0.28 | 0.608465 | 0.96  |
| PRKCH     | -0.28 | 0.608465 | 0.96  |
| PRPSAP1   | -0.28 | 0.608465 | 0.96  |
| PTPN5     | -0.28 | 0.608464 | 0.96  |
| QTRT1     | -0.28 | 0.608465 | 0.96  |
| RAB11FIP5 | -0.28 | 0.608465 | 0.96  |
| RAB39B    | -0.28 | 0.608465 | 0.96  |
| RASL12    | -0.28 | 0.608465 | 0.96  |
| RNF123    | -0.28 | 0.608465 | 0.96  |
| SCX       | -0.28 | 0.608465 | 0.96  |
| SERPINB7  | -0.28 | 0.608465 | 0.96  |
| SGOL1     | -0.28 | 0.608465 | 0.96  |
| SH3BP5L   | -0.28 | 0.608465 | 0.96  |
| SLC36A1   | -0.28 | 0.608465 | 0.96  |
| SLC4A10   | -0.28 | 0.608464 | 0.96  |
| SPATA31D4 | -0.28 | 0.608465 | 0.96  |
| SPRTN     | -0.28 | 0.6266   | 0.962 |
| TAF9B     | -0.28 | 0.608465 | 0.96  |
| TFDP2     | -0.28 | 0.6266   | 0.962 |
| TGFB1I1   | -0.28 | 0.608465 | 0.96  |
| TLX2      | -0.28 | 0.6266   | 0.962 |
| TMEM100   | -0.28 | 0.608465 | 0.96  |
| TPRX1     | -0.28 | 0.608465 | 0.96  |
| TRIM21    | -0.28 | 0.6266   | 0.962 |
| TRIM34    | -0.28 | 0.608465 | 0.96  |

|          |       |          |       |
|----------|-------|----------|-------|
| TRIM44   | -0.28 | 0.6266   | 0.962 |
| TRPM2    | -0.28 | 0.608465 | 0.96  |
| UBE2QL1  | -0.28 | 0.6266   | 0.962 |
| UBXN2A   | -0.28 | 0.626599 | 0.962 |
| WDR54    | -0.28 | 0.608464 | 0.96  |
| ZC3HC1   | -0.28 | 0.608464 | 0.96  |
| ZNF182   | -0.28 | 0.608465 | 0.96  |
| ZNF383   | -0.28 | 0.608465 | 0.96  |
| ZNF581   | -0.28 | 0.608465 | 0.96  |
| ZNF618   | -0.28 | 0.608465 | 0.96  |
| ACSBG1   | -0.27 | 0.620808 | 0.961 |
| AKR7A2   | -0.27 | 0.620808 | 0.961 |
| ALOX5    | -0.27 | 0.620808 | 0.961 |
| ANKRD36C | -0.27 | 0.620808 | 0.961 |
| APOBEC1  | -0.27 | 0.620808 | 0.961 |
| ARHGAP15 | -0.27 | 0.620808 | 0.961 |
| BABAM1   | -0.27 | 0.620808 | 0.961 |
| BBC3     | -0.27 | 0.638509 | 0.963 |
| BCAS2    | -0.27 | 0.620808 | 0.961 |
| C1QTNF3  | -0.27 | 0.620808 | 0.961 |
| C7orf43  | -0.27 | 0.620808 | 0.961 |
| CD200R1L | -0.27 | 0.620808 | 0.961 |
| CDKL3    | -0.27 | 0.620808 | 0.961 |
| CH25H    | -0.27 | 0.620808 | 0.961 |
| CHRNA6   | -0.27 | 0.620808 | 0.961 |
| CMA1     | -0.27 | 0.620808 | 0.961 |
| CPA4     | -0.27 | 0.620808 | 0.961 |
| CRABP2   | -0.27 | 0.620808 | 0.961 |
| CRYBA1   | -0.27 | 0.620808 | 0.961 |
| DICER1   | -0.27 | 0.638509 | 0.963 |
| DMRTC1B  | -0.27 | 0.620808 | 0.961 |
| DYNC1I2  | -0.27 | 0.620808 | 0.961 |
| EVX2     | -0.27 | 0.620808 | 0.961 |
| FAM122C  | -0.27 | 0.620808 | 0.961 |
| FAM45A   | -0.27 | 0.620808 | 0.961 |
| FCGR1A   | -0.27 | 0.620808 | 0.961 |
| FRS2     | -0.27 | 0.620808 | 0.961 |
| GALNT14  | -0.27 | 0.620808 | 0.961 |
| GNAZ     | -0.27 | 0.620808 | 0.961 |
| GPR39    | -0.27 | 0.638509 | 0.963 |
| GPR64    | -0.27 | 0.620808 | 0.961 |
| GRIA2    | -0.27 | 0.620808 | 0.961 |
| HHLA3    | -0.27 | 0.620808 | 0.961 |
| HTR3C    | -0.27 | 0.620808 | 0.961 |
| ITGBL1   | -0.27 | 0.620808 | 0.961 |
| KCNJ5    | -0.27 | 0.620808 | 0.961 |
| LEPREL4  | -0.27 | 0.620808 | 0.961 |

|          |       |          |       |
|----------|-------|----------|-------|
| MELK     | -0.27 | 0.620808 | 0.961 |
| MN1      | -0.27 | 0.620808 | 0.961 |
| MOB3B    | -0.27 | 0.620808 | 0.961 |
| MS4A4A   | -0.27 | 0.620808 | 0.961 |
| MTX3     | -0.27 | 0.620808 | 0.961 |
| NFAM1    | -0.27 | 0.620808 | 0.961 |
| NINJ1    | -0.27 | 0.620808 | 0.961 |
| NLRC5    | -0.27 | 0.638509 | 0.963 |
| NPIPA3   | -0.27 | 0.698758 | 0.97  |
| NPIP3    | -0.27 | 0.722785 | 0.97  |
| OR10R2   | -0.27 | 0.620808 | 0.961 |
| OR14I1   | -0.27 | 0.620808 | 0.961 |
| OR52I2   | -0.27 | 0.620808 | 0.961 |
| OR56A1   | -0.27 | 0.620808 | 0.961 |
| OR5D14   | -0.27 | 0.620808 | 0.961 |
| ORM1     | -0.27 | 0.638508 | 0.963 |
| PCCB     | -0.27 | 0.620808 | 0.961 |
| PCDHGB6  | -0.27 | 0.620808 | 0.961 |
| PEX11G   | -0.27 | 0.620808 | 0.961 |
| PGA4     | -0.27 | 0.620808 | 0.961 |
| PNLIPRP1 | -0.27 | 0.620808 | 0.961 |
| PTPRC    | -0.27 | 0.620808 | 0.961 |
| PYROXD2  | -0.27 | 0.620808 | 0.961 |
| RAB24    | -0.27 | 0.620808 | 0.961 |
| RAP1B    | -0.27 | 0.620808 | 0.961 |
| RCHY1    | -0.27 | 0.620808 | 0.961 |
| RHBDD2   | -0.27 | 0.620808 | 0.961 |
| RPS10    | -0.27 | 0.620808 | 0.961 |
| SCARA3   | -0.27 | 0.620808 | 0.961 |
| SDR39U1  | -0.27 | 0.620808 | 0.961 |
| SETD7    | -0.27 | 0.638508 | 0.963 |
| SFN      | -0.27 | 0.620808 | 0.961 |
| SLC28A1  | -0.27 | 0.620808 | 0.961 |
| SLC5A4   | -0.27 | 0.620808 | 0.961 |
| SMG8     | -0.27 | 0.638509 | 0.963 |
| SPAM1    | -0.27 | 0.620808 | 0.961 |
| SPECC1   | -0.27 | 0.620808 | 0.961 |
| SRCAP    | -0.27 | 0.620808 | 0.961 |
| STX16    | -0.27 | 0.620808 | 0.961 |
| TAC1     | -0.27 | 0.620808 | 0.961 |
| TCAIM    | -0.27 | 0.620808 | 0.961 |
| TCF23    | -0.27 | 0.620808 | 0.961 |
| TEKT5    | -0.27 | 0.620808 | 0.961 |
| TLK1     | -0.27 | 0.620808 | 0.961 |
| TMED2    | -0.27 | 0.620808 | 0.961 |
| TTC3     | -0.27 | 0.620808 | 0.961 |
| TTLL7    | -0.27 | 0.620808 | 0.961 |

|           |       |          |       |
|-----------|-------|----------|-------|
| UPP1      | -0.27 | 0.620808 | 0.961 |
| ZBTB45    | -0.27 | 0.620808 | 0.961 |
| ZFAND2A   | -0.27 | 0.620808 | 0.961 |
| ZFP30     | -0.27 | 0.620808 | 0.961 |
| ZNF33A    | -0.27 | 0.620808 | 0.961 |
| ZNF860    | -0.27 | 0.620808 | 0.961 |
| ACER1     | -0.26 | 0.633307 | 0.962 |
| AJUBA     | -0.26 | 0.633307 | 0.962 |
| AKR1A1    | -0.26 | 0.633308 | 0.962 |
| ALS2CR12  | -0.26 | 0.650534 | 0.967 |
| AMICA1    | -0.26 | 0.633308 | 0.962 |
| APMAP     | -0.26 | 0.633307 | 0.962 |
| ATG16L1   | -0.26 | 0.633308 | 0.962 |
| ATRNL1    | -0.26 | 0.633308 | 0.962 |
| AXL       | -0.26 | 0.633308 | 0.962 |
| BEND4     | -0.26 | 0.633307 | 0.962 |
| BFAR      | -0.26 | 0.633307 | 0.962 |
| BTNL2     | -0.26 | 0.633307 | 0.962 |
| C16orf90  | -0.26 | 0.650534 | 0.967 |
| CADM1     | -0.26 | 0.633308 | 0.962 |
| CALB2     | -0.26 | 0.633308 | 0.962 |
| CCDC50    | -0.26 | 0.633307 | 0.962 |
| CCL25     | -0.26 | 0.633307 | 0.962 |
| CPAMD8    | -0.26 | 0.633307 | 0.962 |
| CT45A1    | -0.26 | 0.633308 | 0.962 |
| CYP51A1   | -0.26 | 0.633307 | 0.962 |
| DAGLA     | -0.26 | 0.650534 | 0.967 |
| DALRD3    | -0.26 | 0.633308 | 0.962 |
| DCDC2C    | -0.26 | 0.633307 | 0.962 |
| DCUN1D2   | -0.26 | 0.633307 | 0.962 |
| DFNB31    | -0.26 | 0.633308 | 0.962 |
| DMRTC1    | -0.26 | 0.633307 | 0.962 |
| EDDM3A    | -0.26 | 0.633307 | 0.962 |
| EFHD2     | -0.26 | 0.650534 | 0.967 |
| EXOSC4    | -0.26 | 0.650534 | 0.967 |
| FAM63B    | -0.26 | 0.650534 | 0.967 |
| GABRA2    | -0.26 | 0.633308 | 0.962 |
| GCDH      | -0.26 | 0.633308 | 0.962 |
| GPR114    | -0.26 | 0.633307 | 0.962 |
| GPR22     | -0.26 | 0.633308 | 0.962 |
| GPSM1     | -0.26 | 0.633307 | 0.962 |
| GRM5      | -0.26 | 0.633308 | 0.962 |
| HADHA     | -0.26 | 0.633308 | 0.962 |
| HIST1H2BG | -0.26 | 0.650534 | 0.967 |
| HLA-E     | -0.26 | 0.633308 | 0.962 |
| HS3ST3A1  | -0.26 | 0.633308 | 0.962 |
| IFNW1     | -0.26 | 0.633308 | 0.962 |

|           |       |          |       |
|-----------|-------|----------|-------|
| IGFBP2    | -0.26 | 0.633308 | 0.962 |
| IL10RA    | -0.26 | 0.633307 | 0.962 |
| INSR      | -0.26 | 0.633308 | 0.962 |
| KCNT2     | -0.26 | 0.633307 | 0.962 |
| KLHL36    | -0.26 | 0.633307 | 0.962 |
| KLRG1     | -0.26 | 0.633307 | 0.962 |
| KRTAP29-1 | -0.26 | 0.650534 | 0.967 |
| LNP1      | -0.26 | 0.668652 | 0.97  |
| LRRIQ1    | -0.26 | 0.633308 | 0.962 |
| MAP3K11   | -0.26 | 0.633307 | 0.962 |
| MATN2     | -0.26 | 0.633308 | 0.962 |
| MPP6      | -0.26 | 0.633308 | 0.962 |
| NCALD     | -0.26 | 0.633307 | 0.962 |
| NECAB2    | -0.26 | 0.633308 | 0.962 |
| NSUN6     | -0.26 | 0.633307 | 0.962 |
| NUP43     | -0.26 | 0.633308 | 0.962 |
| OR10T2    | -0.26 | 0.633307 | 0.962 |
| OR1E2     | -0.26 | 0.633307 | 0.962 |
| OR56A3    | -0.26 | 0.633308 | 0.962 |
| OR6C3     | -0.26 | 0.633307 | 0.962 |
| PDE9A     | -0.26 | 0.650534 | 0.967 |
| PIP5K1A   | -0.26 | 0.633308 | 0.962 |
| PIPOX     | -0.26 | 0.633308 | 0.962 |
| POLR3D    | -0.26 | 0.633308 | 0.962 |
| PPP1R8    | -0.26 | 0.650534 | 0.967 |
| PPP1R9B   | -0.26 | 0.633307 | 0.962 |
| PRAMEF13  | -0.26 | 0.633307 | 0.962 |
| PSMF1     | -0.26 | 0.633308 | 0.962 |
| PTPN6     | -0.26 | 0.633308 | 0.962 |
| RAB27B    | -0.26 | 0.633308 | 0.962 |
| RAB28     | -0.26 | 0.633307 | 0.962 |
| RABL2A    | -0.26 | 0.633307 | 0.962 |
| RFPL2     | -0.26 | 0.633307 | 0.962 |
| RNH1      | -0.26 | 0.633307 | 0.962 |
| RPP25L    | -0.26 | 0.633308 | 0.962 |
| S100A10   | -0.26 | 0.633308 | 0.962 |
| SDK1      | -0.26 | 0.633308 | 0.962 |
| SELV      | -0.26 | 0.633308 | 0.962 |
| SEPT3     | -0.26 | 0.633307 | 0.962 |
| SERF1A    | -0.26 | 0.650534 | 0.967 |
| SERF1B    | -0.26 | 0.650534 | 0.967 |
| SERPINB10 | -0.26 | 0.633308 | 0.962 |
| SETD5     | -0.26 | 0.633307 | 0.962 |
| SLC25A51  | -0.26 | 0.633308 | 0.962 |
| SLC35A1   | -0.26 | 0.633308 | 0.962 |
| SPTLC1    | -0.26 | 0.633308 | 0.962 |
| SRA1      | -0.26 | 0.633307 | 0.962 |

|            |       |          |       |
|------------|-------|----------|-------|
| SRFBP1     | -0.26 | 0.633308 | 0.962 |
| SSX2IP     | -0.26 | 0.650534 | 0.967 |
| STX6       | -0.26 | 0.633308 | 0.962 |
| SYT8       | -0.26 | 0.668653 | 0.97  |
| TBX21      | -0.26 | 0.633308 | 0.962 |
| TCEB3      | -0.26 | 0.633308 | 0.962 |
| TJP3       | -0.26 | 0.633307 | 0.962 |
| TRMT12     | -0.26 | 0.633308 | 0.962 |
| UPK3A      | -0.26 | 0.650534 | 0.967 |
| WBSCR27    | -0.26 | 0.633308 | 0.962 |
| WNT5B      | -0.26 | 0.633307 | 0.962 |
| YEATS4     | -0.26 | 0.633307 | 0.962 |
| ZCCHC12    | -0.26 | 0.633307 | 0.962 |
| ZNF507     | -0.26 | 0.633307 | 0.962 |
| ZNF565     | -0.26 | 0.633308 | 0.962 |
| ZPBP       | -0.26 | 0.650534 | 0.967 |
| ZRANB3     | -0.26 | 0.633308 | 0.962 |
| ABCC9      | -0.25 | 0.645966 | 0.963 |
| ACAD11     | -0.25 | 0.645965 | 0.963 |
| ADAM11     | -0.25 | 0.645965 | 0.963 |
| ADO        | -0.25 | 0.645965 | 0.963 |
| AGA        | -0.25 | 0.645966 | 0.963 |
| ANP32B     | -0.25 | 0.645966 | 0.963 |
| APCDD1     | -0.25 | 0.645965 | 0.963 |
| ARID1B     | -0.25 | 0.645965 | 0.963 |
| ASF1B      | -0.25 | 0.645965 | 0.963 |
| ATP5J2-PTC | -0.25 | 0.662679 | 0.97  |
| ATP8A1     | -0.25 | 0.645965 | 0.963 |
| BCAP31     | -0.25 | 0.645965 | 0.963 |
| BCL10      | -0.25 | 0.645966 | 0.963 |
| BDNF       | -0.25 | 0.645966 | 0.963 |
| BMP2       | -0.25 | 0.645965 | 0.963 |
| BMPR1B     | -0.25 | 0.645965 | 0.963 |
| C16orf11   | -0.25 | 0.645966 | 0.963 |
| C1GALT1    | -0.25 | 0.645965 | 0.963 |
| C3orf52    | -0.25 | 0.645966 | 0.963 |
| C4orf47    | -0.25 | 0.645965 | 0.963 |
| CCL20      | -0.25 | 0.645965 | 0.963 |
| CDCP1      | -0.25 | 0.645965 | 0.963 |
| CHAF1B     | -0.25 | 0.645966 | 0.963 |
| CHSY3      | -0.25 | 0.645965 | 0.963 |
| CSGALNAC   | -0.25 | 0.66268  | 0.97  |
| DDB2       | -0.25 | 0.645965 | 0.963 |
| DGUOK      | -0.25 | 0.645965 | 0.963 |
| DPYSL5     | -0.25 | 0.66268  | 0.97  |
| FAM65C     | -0.25 | 0.645965 | 0.963 |
| FKBP1B     | -0.25 | 0.645965 | 0.963 |

|          |       |          |       |
|----------|-------|----------|-------|
| GABPB2   | -0.25 | 0.645965 | 0.963 |
| GATAD2A  | -0.25 | 0.645965 | 0.963 |
| GDF3     | -0.25 | 0.645965 | 0.963 |
| GGTLC2   | -0.25 | 0.645965 | 0.963 |
| GPR174   | -0.25 | 0.645965 | 0.963 |
| GTPBP2   | -0.25 | 0.645965 | 0.963 |
| HDAC9    | -0.25 | 0.645965 | 0.963 |
| HOXA7    | -0.25 | 0.645966 | 0.963 |
| IGDCC3   | -0.25 | 0.645965 | 0.963 |
| IPO7     | -0.25 | 0.645965 | 0.963 |
| KCTD10   | -0.25 | 0.645965 | 0.963 |
| KCTD12   | -0.25 | 0.645965 | 0.963 |
| KDM4E    | -0.25 | 0.645965 | 0.963 |
| KIAA1147 | -0.25 | 0.645965 | 0.963 |
| KIF20A   | -0.25 | 0.645966 | 0.963 |
| KIFC3    | -0.25 | 0.645965 | 0.963 |
| KRT14    | -0.25 | 0.645965 | 0.963 |
| KRT2     | -0.25 | 0.66268  | 0.97  |
| LAIR1    | -0.25 | 0.699277 | 0.97  |
| LAMB4    | -0.25 | 0.645965 | 0.963 |
| LARS2    | -0.25 | 0.66268  | 0.97  |
| LOXL3    | -0.25 | 0.645966 | 0.963 |
| LPHN1    | -0.25 | 0.645965 | 0.963 |
| LRRC14B  | -0.25 | 0.645965 | 0.963 |
| LRRC52   | -0.25 | 0.645965 | 0.963 |
| LY6G5B   | -0.25 | 0.645965 | 0.963 |
| MAVS     | -0.25 | 0.645965 | 0.963 |
| MRPL34   | -0.25 | 0.680101 | 0.97  |
| MRPL36   | -0.25 | 0.645965 | 0.963 |
| MSRB2    | -0.25 | 0.645965 | 0.963 |
| MSTN     | -0.25 | 0.645965 | 0.963 |
| MTMR12   | -0.25 | 0.645965 | 0.963 |
| MTMR7    | -0.25 | 0.645966 | 0.963 |
| NAPEPLD  | -0.25 | 0.645965 | 0.963 |
| NAT9     | -0.25 | 0.645965 | 0.963 |
| NETO1    | -0.25 | 0.645965 | 0.963 |
| NOP58    | -0.25 | 0.66268  | 0.97  |
| NUDCD1   | -0.25 | 0.645965 | 0.963 |
| OLFM2    | -0.25 | 0.645965 | 0.963 |
| PDHA2    | -0.25 | 0.645965 | 0.963 |
| PGBD3    | -0.25 | 0.645965 | 0.963 |
| PGLS     | -0.25 | 0.645966 | 0.963 |
| PLA2G6   | -0.25 | 0.645965 | 0.963 |
| PNOC     | -0.25 | 0.645966 | 0.963 |
| POPDC3   | -0.25 | 0.645965 | 0.963 |
| PPP1R1B  | -0.25 | 0.645966 | 0.963 |
| PRAMEF12 | -0.25 | 0.645965 | 0.963 |

|          |       |          |       |
|----------|-------|----------|-------|
| PRAMEF22 | -0.25 | 0.645965 | 0.963 |
| PTCD1    | -0.25 | 0.662679 | 0.97  |
| PXK      | -0.25 | 0.645965 | 0.963 |
| RASSF7   | -0.25 | 0.645965 | 0.963 |
| RNF13    | -0.25 | 0.645965 | 0.963 |
| RPL3     | -0.25 | 0.645965 | 0.963 |
| RPRM     | -0.25 | 0.645965 | 0.963 |
| SACM1L   | -0.25 | 0.645965 | 0.963 |
| SCD5     | -0.25 | 0.645965 | 0.963 |
| SCGB1D2  | -0.25 | 0.645966 | 0.963 |
| SEMA4A   | -0.25 | 0.645965 | 0.963 |
| SERINC3  | -0.25 | 0.66268  | 0.97  |
| SHROOM2  | -0.25 | 0.645965 | 0.963 |
| SLC11A1  | -0.25 | 0.645966 | 0.963 |
| SLC22A10 | -0.25 | 0.645965 | 0.963 |
| SLC25A37 | -0.25 | 0.645965 | 0.963 |
| SLC35D2  | -0.25 | 0.645965 | 0.963 |
| SLC4A3   | -0.25 | 0.645966 | 0.963 |
| SLC51A   | -0.25 | 0.645965 | 0.963 |
| SMTN     | -0.25 | 0.645966 | 0.963 |
| SPTSSB   | -0.25 | 0.645965 | 0.963 |
| SRCIN1   | -0.25 | 0.645965 | 0.963 |
| ST8SIA1  | -0.25 | 0.662679 | 0.97  |
| SWAP70   | -0.25 | 0.645966 | 0.963 |
| SYNJ1    | -0.25 | 0.645965 | 0.963 |
| TAF1B    | -0.25 | 0.645965 | 0.963 |
| TAS2R39  | -0.25 | 0.645965 | 0.963 |
| TRIM10   | -0.25 | 0.645965 | 0.963 |
| TUBA1B   | -0.25 | 0.680102 | 0.97  |
| XKR9     | -0.25 | 0.645966 | 0.963 |
| ZNF684   | -0.25 | 0.645966 | 0.963 |
| ZNF716   | -0.25 | 0.645965 | 0.963 |
| ZNF862   | -0.25 | 0.645966 | 0.963 |
| ZRANB2   | -0.25 | 0.645965 | 0.963 |
| ACTRT3   | -0.24 | 0.658714 | 0.967 |
| ADAM23   | -0.24 | 0.658714 | 0.967 |
| ARHGDIB  | -0.24 | 0.658715 | 0.967 |
| B3GAT1   | -0.24 | 0.658714 | 0.967 |
| BEND2    | -0.24 | 0.658715 | 0.967 |
| C1orf234 | -0.24 | 0.658714 | 0.967 |
| C22orf34 | -0.24 | 0.674938 | 0.97  |
| C2orf82  | -0.24 | 0.658715 | 0.967 |
| C6orf99  | -0.24 | 0.658714 | 0.967 |
| CA14     | -0.24 | 0.658714 | 0.967 |
| CA3      | -0.24 | 0.658714 | 0.967 |
| CCDC106  | -0.24 | 0.658715 | 0.967 |
| CCL14    | -0.24 | 0.658714 | 0.967 |

|           |       |          |       |
|-----------|-------|----------|-------|
| CEACAM16  | -0.24 | 0.658714 | 0.967 |
| CENPF     | -0.24 | 0.658714 | 0.967 |
| CEP78     | -0.24 | 0.658714 | 0.967 |
| CES3      | -0.24 | 0.658714 | 0.967 |
| CFAP46    | -0.24 | 0.658714 | 0.967 |
| CHRNA2    | -0.24 | 0.658715 | 0.967 |
| CLDN4     | -0.24 | 0.658714 | 0.967 |
| CLEC1B    | -0.24 | 0.674938 | 0.97  |
| CMAS      | -0.24 | 0.658714 | 0.967 |
| CMPK1     | -0.24 | 0.658715 | 0.967 |
| CR1       | -0.24 | 0.658714 | 0.967 |
| CSF3R     | -0.24 | 0.658714 | 0.967 |
| DBI       | -0.24 | 0.658714 | 0.967 |
| DCD       | -0.24 | 0.674938 | 0.97  |
| DGAT2     | -0.24 | 0.658714 | 0.967 |
| DGKK      | -0.24 | 0.658715 | 0.967 |
| GIN5      | -0.24 | 0.674938 | 0.97  |
| GTF2A1    | -0.24 | 0.658714 | 0.967 |
| HSPB6     | -0.24 | 0.658714 | 0.967 |
| HTR5A     | -0.24 | 0.658714 | 0.967 |
| ICOSLG    | -0.24 | 0.658714 | 0.967 |
| IFNL2     | -0.24 | 0.658714 | 0.967 |
| IKBK      | -0.24 | 0.658715 | 0.967 |
| IMMT      | -0.24 | 0.674938 | 0.97  |
| KCNJ3     | -0.24 | 0.674939 | 0.97  |
| KIAA1598  | -0.24 | 0.658715 | 0.967 |
| KPNA6     | -0.24 | 0.674938 | 0.97  |
| LIMD1     | -0.24 | 0.658714 | 0.967 |
| LOC286238 | -0.24 | 0.658714 | 0.967 |
| LPAR3     | -0.24 | 0.658714 | 0.967 |
| LRIT1     | -0.24 | 0.674938 | 0.97  |
| LYZL2     | -0.24 | 0.658714 | 0.967 |
| MCC       | -0.24 | 0.658714 | 0.967 |
| MED14OS   | -0.24 | 0.69167  | 0.97  |
| MUC13     | -0.24 | 0.658714 | 0.967 |
| NDUFA10   | -0.24 | 0.674938 | 0.97  |
| NIPA2     | -0.24 | 0.658714 | 0.967 |
| NR2F1     | -0.24 | 0.658714 | 0.967 |
| NR5A1     | -0.24 | 0.658714 | 0.967 |
| NUDT12    | -0.24 | 0.674938 | 0.97  |
| OR5AR1    | -0.24 | 0.658714 | 0.967 |
| PBLD      | -0.24 | 0.658714 | 0.967 |
| PCBP1     | -0.24 | 0.658714 | 0.967 |
| PDCD1LG2  | -0.24 | 0.658714 | 0.967 |
| PER3      | -0.24 | 0.658714 | 0.967 |
| PGAM4     | -0.24 | 0.658714 | 0.967 |
| PGM2      | -0.24 | 0.658714 | 0.967 |

|           |       |          |       |
|-----------|-------|----------|-------|
| PKIG      | -0.24 | 0.658714 | 0.967 |
| PLCXD1    | -0.24 | 0.658714 | 0.967 |
| POU5F2    | -0.24 | 0.658714 | 0.967 |
| PRR5L     | -0.24 | 0.658714 | 0.967 |
| RAD54B    | -0.24 | 0.658714 | 0.967 |
| RANGRF    | -0.24 | 0.658714 | 0.967 |
| RASA4     | -0.24 | 0.658714 | 0.967 |
| RBAK-RBAK | -0.24 | 0.674938 | 0.97  |
| RBMXL2    | -0.24 | 0.658714 | 0.967 |
| RERG      | -0.24 | 0.674938 | 0.97  |
| RFTN2     | -0.24 | 0.658714 | 0.967 |
| RIC3      | -0.24 | 0.658714 | 0.967 |
| RIMBP3    | -0.24 | 0.658714 | 0.967 |
| RNF138    | -0.24 | 0.658714 | 0.967 |
| RNF212    | -0.24 | 0.658714 | 0.967 |
| RNF39     | -0.24 | 0.658714 | 0.967 |
| RPS8      | -0.24 | 0.729558 | 0.971 |
| RTL1      | -0.24 | 0.658714 | 0.967 |
| S100A3    | -0.24 | 0.674938 | 0.97  |
| SAFB2     | -0.24 | 0.658715 | 0.967 |
| SDCCAG8   | -0.24 | 0.658714 | 0.967 |
| SDHD      | -0.24 | 0.658714 | 0.967 |
| SFTPD     | -0.24 | 0.658714 | 0.967 |
| SIGLEC7   | -0.24 | 0.674938 | 0.97  |
| SLC1A7    | -0.24 | 0.658714 | 0.967 |
| SYNGR4    | -0.24 | 0.674939 | 0.97  |
| TACR2     | -0.24 | 0.658714 | 0.967 |
| TEX2      | -0.24 | 0.674938 | 0.97  |
| TGFBR2    | -0.24 | 0.658715 | 0.967 |
| TIMM10    | -0.24 | 0.658714 | 0.967 |
| TSEN15    | -0.24 | 0.658714 | 0.967 |
| TSPYL1    | -0.24 | 0.658714 | 0.967 |
| VWA2      | -0.24 | 0.674938 | 0.97  |
| ZDHHC2    | -0.24 | 0.658714 | 0.967 |
| ZNF547    | -0.24 | 0.658714 | 0.967 |
| ZNF728    | -0.24 | 0.658714 | 0.967 |
| ACTC1     | -0.23 | 0.671565 | 0.97  |
| ACVR1C    | -0.23 | 0.671565 | 0.97  |
| ADCK5     | -0.23 | 0.671565 | 0.97  |
| ADNP2     | -0.23 | 0.671565 | 0.97  |
| AKAP8     | -0.23 | 0.671565 | 0.97  |
| AMPH      | -0.23 | 0.671565 | 0.97  |
| ANKRD26   | -0.23 | 0.671565 | 0.97  |
| ANXA13    | -0.23 | 0.671565 | 0.97  |
| AOC1      | -0.23 | 0.687233 | 0.97  |
| ARHGEF39  | -0.23 | 0.671565 | 0.97  |
| ATF1      | -0.23 | 0.671565 | 0.97  |

|             |       |          |      |
|-------------|-------|----------|------|
| C10orf82    | -0.23 | 0.671565 | 0.97 |
| C2orf78     | -0.23 | 0.671565 | 0.97 |
| C4orf6      | -0.23 | 0.671565 | 0.97 |
| C7orf55-LUC | -0.23 | 0.671565 | 0.97 |
| CCDC107     | -0.23 | 0.671565 | 0.97 |
| CCDC64B     | -0.23 | 0.687233 | 0.97 |
| CCNDBP1     | -0.23 | 0.687232 | 0.97 |
| CCNI        | -0.23 | 0.671565 | 0.97 |
| CELA1       | -0.23 | 0.671565 | 0.97 |
| CEP44       | -0.23 | 0.671565 | 0.97 |
| CMYA5       | -0.23 | 0.703418 | 0.97 |
| COX16       | -0.23 | 0.671565 | 0.97 |
| CPA1        | -0.23 | 0.671565 | 0.97 |
| CSNK1G2     | -0.23 | 0.687233 | 0.97 |
| CWF19L1     | -0.23 | 0.671565 | 0.97 |
| DUS3L       | -0.23 | 0.671565 | 0.97 |
| EGFL8       | -0.23 | 0.671565 | 0.97 |
| EPB41       | -0.23 | 0.671565 | 0.97 |
| EPHA2       | -0.23 | 0.671565 | 0.97 |
| ERCC6       | -0.23 | 0.703417 | 0.97 |
| ERGIC2      | -0.23 | 0.671565 | 0.97 |
| FAM185A     | -0.23 | 0.671565 | 0.97 |
| FAM212A     | -0.23 | 0.671565 | 0.97 |
| FGFBP2      | -0.23 | 0.687232 | 0.97 |
| FXVD6       | -0.23 | 0.671565 | 0.97 |
| FYCO1       | -0.23 | 0.687232 | 0.97 |
| FZD7        | -0.23 | 0.687233 | 0.97 |
| GAB1        | -0.23 | 0.671565 | 0.97 |
| GALNT18     | -0.23 | 0.671565 | 0.97 |
| GHR         | -0.23 | 0.671565 | 0.97 |
| GPATCH8     | -0.23 | 0.671565 | 0.97 |
| GRAMD2      | -0.23 | 0.671565 | 0.97 |
| GRASP       | -0.23 | 0.671565 | 0.97 |
| GRIN3A      | -0.23 | 0.671565 | 0.97 |
| HEXA        | -0.23 | 0.671565 | 0.97 |
| HNF1B       | -0.23 | 0.671565 | 0.97 |
| IFNA10      | -0.23 | 0.671565 | 0.97 |
| INSC        | -0.23 | 0.671565 | 0.97 |
| KDM1A       | -0.23 | 0.703418 | 0.97 |
| KIAA0556    | -0.23 | 0.671565 | 0.97 |
| KLHL3       | -0.23 | 0.671565 | 0.97 |
| LMOD1       | -0.23 | 0.703418 | 0.97 |
| LYPD4       | -0.23 | 0.671565 | 0.97 |
| MAN1A1      | -0.23 | 0.671565 | 0.97 |
| MCFD2       | -0.23 | 0.671565 | 0.97 |
| MIOX        | -0.23 | 0.671565 | 0.97 |
| MLANA       | -0.23 | 0.671565 | 0.97 |

|          |       |          |       |
|----------|-------|----------|-------|
| MMP17    | -0.23 | 0.703418 | 0.97  |
| MTX1     | -0.23 | 0.687232 | 0.97  |
| NAV2     | -0.23 | 0.687233 | 0.97  |
| NCF4     | -0.23 | 0.671565 | 0.97  |
| NCR3     | -0.23 | 0.671565 | 0.97  |
| NID1     | -0.23 | 0.671565 | 0.97  |
| NOP2     | -0.23 | 0.703418 | 0.97  |
| OR2L5    | -0.23 | 0.671565 | 0.97  |
| OR2V2    | -0.23 | 0.671565 | 0.97  |
| OR8K3    | -0.23 | 0.671565 | 0.97  |
| PDZK1IP1 | -0.23 | 0.671565 | 0.97  |
| PF4V1    | -0.23 | 0.671565 | 0.97  |
| PHOX2B   | -0.23 | 0.671565 | 0.97  |
| PIGY     | -0.23 | 0.687233 | 0.97  |
| PPT1     | -0.23 | 0.671565 | 0.97  |
| PRRG4    | -0.23 | 0.671565 | 0.97  |
| RAB36    | -0.23 | 0.671565 | 0.97  |
| RABL2B   | -0.23 | 0.671565 | 0.97  |
| RAP1A    | -0.23 | 0.671565 | 0.97  |
| RLIM     | -0.23 | 0.671565 | 0.97  |
| RUSC2    | -0.23 | 0.671565 | 0.97  |
| SALL3    | -0.23 | 0.687232 | 0.97  |
| SDHC     | -0.23 | 0.703418 | 0.97  |
| SH2D3C   | -0.23 | 0.671565 | 0.97  |
| SLC1A6   | -0.23 | 0.671565 | 0.97  |
| SLC27A3  | -0.23 | 0.671565 | 0.97  |
| SMUG1    | -0.23 | 0.671565 | 0.97  |
| SOX1     | -0.23 | 0.671565 | 0.97  |
| SP140L   | -0.23 | 0.671565 | 0.97  |
| SPRR2G   | -0.23 | 0.671565 | 0.97  |
| SSTR4    | -0.23 | 0.671565 | 0.97  |
| STOX2    | -0.23 | 0.671565 | 0.97  |
| STX1B    | -0.23 | 0.671565 | 0.97  |
| SYT13    | -0.23 | 0.671565 | 0.97  |
| TAF1D    | -0.23 | 0.671565 | 0.97  |
| TDP1     | -0.23 | 0.671565 | 0.97  |
| TGM6     | -0.23 | 0.671565 | 0.97  |
| TMC7     | -0.23 | 0.671565 | 0.97  |
| TMEM167A | -0.23 | 0.73997  | 0.972 |
| TOR1AIP2 | -0.23 | 0.671565 | 0.97  |
| TRAF5    | -0.23 | 0.671565 | 0.97  |
| TREML1   | -0.23 | 0.687233 | 0.97  |
| TRIM45   | -0.23 | 0.671565 | 0.97  |
| TRIM56   | -0.23 | 0.671565 | 0.97  |
| TRPV2    | -0.23 | 0.671565 | 0.97  |
| TSPAN2   | -0.23 | 0.671565 | 0.97  |
| TTLL1    | -0.23 | 0.671565 | 0.97  |

|          |       |          |      |
|----------|-------|----------|------|
| UPK2     | -0.23 | 0.671565 | 0.97 |
| URM1     | -0.23 | 0.671565 | 0.97 |
| USP46    | -0.23 | 0.671565 | 0.97 |
| WAC      | -0.23 | 0.687233 | 0.97 |
| WFDC12   | -0.23 | 0.671565 | 0.97 |
| WNT9A    | -0.23 | 0.671565 | 0.97 |
| XAGE2    | -0.23 | 0.671565 | 0.97 |
| XKR4     | -0.23 | 0.671565 | 0.97 |
| ZNF17    | -0.23 | 0.671565 | 0.97 |
| ZNF821   | -0.23 | 0.671565 | 0.97 |
| ACOX3    | -0.22 | 0.684514 | 0.97 |
| ADI1     | -0.22 | 0.684514 | 0.97 |
| ADRA2C   | -0.22 | 0.684514 | 0.97 |
| ANK1     | -0.22 | 0.684515 | 0.97 |
| ANKRD6   | -0.22 | 0.684514 | 0.97 |
| AQP4     | -0.22 | 0.684514 | 0.97 |
| ASCC2    | -0.22 | 0.699627 | 0.97 |
| ATF6     | -0.22 | 0.684514 | 0.97 |
| ATP2B3   | -0.22 | 0.684514 | 0.97 |
| B4GALNT3 | -0.22 | 0.684515 | 0.97 |
| BID      | -0.22 | 0.684515 | 0.97 |
| BLMH     | -0.22 | 0.684514 | 0.97 |
| BLOC1S6  | -0.22 | 0.684515 | 0.97 |
| BTBD7    | -0.22 | 0.684514 | 0.97 |
| C17orf72 | -0.22 | 0.684514 | 0.97 |
| C1orf146 | -0.22 | 0.684515 | 0.97 |
| C2orf70  | -0.22 | 0.699627 | 0.97 |
| C8A      | -0.22 | 0.699627 | 0.97 |
| CACNB3   | -0.22 | 0.684515 | 0.97 |
| CBWD1    | -0.22 | 0.684514 | 0.97 |
| CDH22    | -0.22 | 0.684515 | 0.97 |
| CDK5R2   | -0.22 | 0.699627 | 0.97 |
| CFC1     | -0.22 | 0.684514 | 0.97 |
| COASY    | -0.22 | 0.684515 | 0.97 |
| COX6B2   | -0.22 | 0.684514 | 0.97 |
| CPSF6    | -0.22 | 0.684514 | 0.97 |
| CTDP1    | -0.22 | 0.699627 | 0.97 |
| CXCL12   | -0.22 | 0.684514 | 0.97 |
| CYP8B1   | -0.22 | 0.684514 | 0.97 |
| DCAF4    | -0.22 | 0.699628 | 0.97 |
| DCDC2    | -0.22 | 0.684515 | 0.97 |
| DEFA5    | -0.22 | 0.684515 | 0.97 |
| DNAH2    | -0.22 | 0.699627 | 0.97 |
| EXOSC5   | -0.22 | 0.684515 | 0.97 |
| FAM102B  | -0.22 | 0.684514 | 0.97 |
| FAM228A  | -0.22 | 0.684514 | 0.97 |
| FBXL16   | -0.22 | 0.684514 | 0.97 |

|           |       |          |      |
|-----------|-------|----------|------|
| FOXB2     | -0.22 | 0.684515 | 0.97 |
| FOXD4L5   | -0.22 | 0.684514 | 0.97 |
| FOXF1     | -0.22 | 0.684514 | 0.97 |
| FRG1      | -0.22 | 0.684515 | 0.97 |
| GFAP      | -0.22 | 0.684514 | 0.97 |
| GKN2      | -0.22 | 0.684514 | 0.97 |
| GPAM      | -0.22 | 0.684515 | 0.97 |
| GRK5      | -0.22 | 0.699628 | 0.97 |
| GSTP1     | -0.22 | 0.684514 | 0.97 |
| HAND1     | -0.22 | 0.684515 | 0.97 |
| HAS2      | -0.22 | 0.684514 | 0.97 |
| HFE2      | -0.22 | 0.684514 | 0.97 |
| HIST1H2AC | -0.22 | 0.684515 | 0.97 |
| HSD17B2   | -0.22 | 0.684514 | 0.97 |
| HUNK      | -0.22 | 0.684514 | 0.97 |
| IL11      | -0.22 | 0.684514 | 0.97 |
| KIZ       | -0.22 | 0.699627 | 0.97 |
| KPRP      | -0.22 | 0.699627 | 0.97 |
| LGALS8    | -0.22 | 0.684514 | 0.97 |
| LHX1      | -0.22 | 0.684515 | 0.97 |
| LLGL2     | -0.22 | 0.684514 | 0.97 |
| LRRC37A3  | -0.22 | 0.684514 | 0.97 |
| LYVE1     | -0.22 | 0.684514 | 0.97 |
| MADCAM1   | -0.22 | 0.684515 | 0.97 |
| MAP9      | -0.22 | 0.684515 | 0.97 |
| MED20     | -0.22 | 0.684514 | 0.97 |
| MINK1     | -0.22 | 0.684515 | 0.97 |
| MRPS6     | -0.22 | 0.684514 | 0.97 |
| MS4A12    | -0.22 | 0.684514 | 0.97 |
| MTMR1     | -0.22 | 0.684514 | 0.97 |
| NEUROG1   | -0.22 | 0.684514 | 0.97 |
| NKAP      | -0.22 | 0.699627 | 0.97 |
| NMBR      | -0.22 | 0.699627 | 0.97 |
| NOL12     | -0.22 | 0.699628 | 0.97 |
| NPNT      | -0.22 | 0.684514 | 0.97 |
| NUP62     | -0.22 | 0.715118 | 0.97 |
| OR1J2     | -0.22 | 0.699627 | 0.97 |
| OR2T5     | -0.22 | 0.699627 | 0.97 |
| OR4C3     | -0.22 | 0.684514 | 0.97 |
| OR9Q1     | -0.22 | 0.684514 | 0.97 |
| PALMD     | -0.22 | 0.684515 | 0.97 |
| PATE2     | -0.22 | 0.684515 | 0.97 |
| PIAS2     | -0.22 | 0.684514 | 0.97 |
| PLCB1     | -0.22 | 0.684514 | 0.97 |
| PLIN2     | -0.22 | 0.684515 | 0.97 |
| PPAT      | -0.22 | 0.684515 | 0.97 |
| PTGES3    | -0.22 | 0.684515 | 0.97 |

|          |       |          |       |
|----------|-------|----------|-------|
| PTRHD1   | -0.22 | 0.684514 | 0.97  |
| RAPH1    | -0.22 | 0.699627 | 0.97  |
| RASSF2   | -0.22 | 0.684515 | 0.97  |
| RCBTB1   | -0.22 | 0.684514 | 0.97  |
| RIOK1    | -0.22 | 0.699627 | 0.97  |
| RMDN3    | -0.22 | 0.684515 | 0.97  |
| RNF11    | -0.22 | 0.684514 | 0.97  |
| RPGRIP1L | -0.22 | 0.684515 | 0.97  |
| RPRML    | -0.22 | 0.684514 | 0.97  |
| SBK3     | -0.22 | 0.684515 | 0.97  |
| SEPT12   | -0.22 | 0.684514 | 0.97  |
| SERPINB6 | -0.22 | 0.684515 | 0.97  |
| SH3BGRL2 | -0.22 | 0.684515 | 0.97  |
| SLC35D1  | -0.22 | 0.699627 | 0.97  |
| SLC38A1  | -0.22 | 0.684514 | 0.97  |
| SLC7A14  | -0.22 | 0.684514 | 0.97  |
| SLFN1    | -0.22 | 0.684515 | 0.97  |
| SPRED2   | -0.22 | 0.684515 | 0.97  |
| SPTBN1   | -0.22 | 0.684515 | 0.97  |
| SYP      | -0.22 | 0.684515 | 0.97  |
| TANGO2   | -0.22 | 0.699628 | 0.97  |
| TCEANC2  | -0.22 | 0.684515 | 0.97  |
| TCEB2    | -0.22 | 0.699628 | 0.97  |
| TCERG1L  | -0.22 | 0.684515 | 0.97  |
| TFF1     | -0.22 | 0.684514 | 0.97  |
| TFG      | -0.22 | 0.699628 | 0.97  |
| TM4SF1   | -0.22 | 0.684514 | 0.97  |
| TMEM151A | -0.22 | 0.684514 | 0.97  |
| TMEM247  | -0.22 | 0.684514 | 0.97  |
| TMEM50B  | -0.22 | 0.684515 | 0.97  |
| TMEM69   | -0.22 | 0.684514 | 0.97  |
| TRPC7    | -0.22 | 0.684514 | 0.97  |
| TUBA8    | -0.22 | 0.699627 | 0.97  |
| UBE2W    | -0.22 | 0.684514 | 0.97  |
| VPS37C   | -0.22 | 0.684515 | 0.97  |
| WDR12    | -0.22 | 0.732343 | 0.971 |
| WFDC9    | -0.22 | 0.684514 | 0.97  |
| ZNF138   | -0.22 | 0.684515 | 0.97  |
| ZNF41    | -0.22 | 0.684514 | 0.97  |
| ZP4      | -0.22 | 0.684514 | 0.97  |
| AGO4     | -0.21 | 0.697517 | 0.97  |
| AMPD3    | -0.21 | 0.697517 | 0.97  |
| ANKRD13A | -0.21 | 0.697517 | 0.97  |
| APOA4    | -0.21 | 0.712078 | 0.97  |
| ARHGAP5  | -0.21 | 0.697517 | 0.97  |
| ARHGEF28 | -0.21 | 0.697517 | 0.97  |
| ATP6V0D2 | -0.21 | 0.697518 | 0.97  |

|          |       |          |       |
|----------|-------|----------|-------|
| ATP8B4   | -0.21 | 0.697517 | 0.97  |
| AZI2     | -0.21 | 0.697517 | 0.97  |
| BEST2    | -0.21 | 0.697517 | 0.97  |
| BPIFB4   | -0.21 | 0.697517 | 0.97  |
| BPIFB6   | -0.21 | 0.697517 | 0.97  |
| C2CD4A   | -0.21 | 0.697517 | 0.97  |
| C3orf62  | -0.21 | 0.712079 | 0.97  |
| C9orf131 | -0.21 | 0.712078 | 0.97  |
| CA6      | -0.21 | 0.697517 | 0.97  |
| CCDC38   | -0.21 | 0.697517 | 0.97  |
| CFC1B    | -0.21 | 0.697517 | 0.97  |
| CHRFAM7A | -0.21 | 0.697517 | 0.97  |
| COL18A1  | -0.21 | 0.712078 | 0.97  |
| COL5A1   | -0.21 | 0.697517 | 0.97  |
| COMMD7   | -0.21 | 0.697518 | 0.97  |
| COMMD8   | -0.21 | 0.697517 | 0.97  |
| COX5B    | -0.21 | 0.712079 | 0.97  |
| CRYBB2   | -0.21 | 0.697518 | 0.97  |
| CTPS2    | -0.21 | 0.697517 | 0.97  |
| CYBB     | -0.21 | 0.697517 | 0.97  |
| DEFB119  | -0.21 | 0.697517 | 0.97  |
| DTX2     | -0.21 | 0.697517 | 0.97  |
| EHF      | -0.21 | 0.697517 | 0.97  |
| EIF2AK4  | -0.21 | 0.697518 | 0.97  |
| EXOC3L4  | -0.21 | 0.726968 | 0.971 |
| FAM53B   | -0.21 | 0.697517 | 0.97  |
| FBXW8    | -0.21 | 0.697517 | 0.97  |
| FIGNL1   | -0.21 | 0.697517 | 0.97  |
| FOLR3    | -0.21 | 0.697517 | 0.97  |
| GAD2     | -0.21 | 0.697517 | 0.97  |
| GFOD2    | -0.21 | 0.697517 | 0.97  |
| HAUS6    | -0.21 | 0.697517 | 0.97  |
| HDAC5    | -0.21 | 0.697517 | 0.97  |
| HTR3B    | -0.21 | 0.697517 | 0.97  |
| IARS     | -0.21 | 0.726968 | 0.971 |
| IL17B    | -0.21 | 0.697517 | 0.97  |
| IL17REL  | -0.21 | 0.697517 | 0.97  |
| JHDM1D   | -0.21 | 0.726969 | 0.971 |
| KCNQ4    | -0.21 | 0.697518 | 0.97  |
| KCTD2    | -0.21 | 0.697517 | 0.97  |
| KIFC2    | -0.21 | 0.697517 | 0.97  |
| KIR3DL1  | -0.21 | 0.697517 | 0.97  |
| KISS1    | -0.21 | 0.712079 | 0.97  |
| KRT17    | -0.21 | 0.697518 | 0.97  |
| KRTAP5-1 | -0.21 | 0.697517 | 0.97  |
| LIN7B    | -0.21 | 0.697517 | 0.97  |
| MACROD2  | -0.21 | 0.697517 | 0.97  |

|          |       |          |       |
|----------|-------|----------|-------|
| MAGEA11  | -0.21 | 0.697518 | 0.97  |
| METTL22  | -0.21 | 0.697517 | 0.97  |
| MRPS18C  | -0.21 | 0.697518 | 0.97  |
| MUT      | -0.21 | 0.697517 | 0.97  |
| MYOM2    | -0.21 | 0.697518 | 0.97  |
| NAT8     | -0.21 | 0.697517 | 0.97  |
| NOL4     | -0.21 | 0.697517 | 0.97  |
| OIP5     | -0.21 | 0.697517 | 0.97  |
| PDIA3    | -0.21 | 0.697517 | 0.97  |
| PHF3     | -0.21 | 0.697517 | 0.97  |
| PNMA3    | -0.21 | 0.697518 | 0.97  |
| PNMAL2   | -0.21 | 0.712079 | 0.97  |
| PRAMEF18 | -0.21 | 0.697517 | 0.97  |
| R3HDM4   | -0.21 | 0.712079 | 0.97  |
| RAB39A   | -0.21 | 0.697518 | 0.97  |
| RASA1    | -0.21 | 0.712078 | 0.97  |
| RHCE     | -0.21 | 0.697517 | 0.97  |
| RIPK1    | -0.21 | 0.697518 | 0.97  |
| RNASEH2A | -0.21 | 0.712079 | 0.97  |
| SEMA3G   | -0.21 | 0.697517 | 0.97  |
| SEMG1    | -0.21 | 0.697517 | 0.97  |
| SEPT13   | -0.21 | 0.697517 | 0.97  |
| SLC14A1  | -0.21 | 0.712079 | 0.97  |
| SLC25A36 | -0.21 | 0.697517 | 0.97  |
| SLC38A10 | -0.21 | 0.697518 | 0.97  |
| SLC38A4  | -0.21 | 0.697517 | 0.97  |
| SLC6A9   | -0.21 | 0.712079 | 0.97  |
| SLCO1B7  | -0.21 | 0.697517 | 0.97  |
| SNX11    | -0.21 | 0.697518 | 0.97  |
| SOCS1    | -0.21 | 0.697517 | 0.97  |
| STK19    | -0.21 | 0.697518 | 0.97  |
| TAGLN3   | -0.21 | 0.697517 | 0.97  |
| TBC1D22B | -0.21 | 0.697517 | 0.97  |
| TBC1D24  | -0.21 | 0.712079 | 0.97  |
| TCEB3B   | -0.21 | 0.712079 | 0.97  |
| TCTN1    | -0.21 | 0.697517 | 0.97  |
| TECRL    | -0.21 | 0.697517 | 0.97  |
| TEKT3    | -0.21 | 0.697517 | 0.97  |
| TIMM23B  | -0.21 | 0.760991 | 0.972 |
| TMEM92   | -0.21 | 0.697517 | 0.97  |
| TNNT3    | -0.21 | 0.697517 | 0.97  |
| UBTFL1   | -0.21 | 0.697517 | 0.97  |
| VWA5A    | -0.21 | 0.697517 | 0.97  |
| WDR59    | -0.21 | 0.697517 | 0.97  |
| WDR78    | -0.21 | 0.697517 | 0.97  |
| WNK3     | -0.21 | 0.697517 | 0.97  |
| ZDHHC19  | -0.21 | 0.697517 | 0.97  |

|          |       |          |       |
|----------|-------|----------|-------|
| ZFYVE26  | -0.21 | 0.697517 | 0.97  |
| ZFYVE9   | -0.21 | 0.712079 | 0.97  |
| ZNF215   | -0.21 | 0.697518 | 0.97  |
| ZNF436   | -0.21 | 0.697517 | 0.97  |
| AAK1     | -0.2  | 0.710633 | 0.97  |
| ABHD15   | -0.2  | 0.710633 | 0.97  |
| ADAMTS10 | -0.2  | 0.710632 | 0.97  |
| ADAMTS9  | -0.2  | 0.710632 | 0.97  |
| AGPAT9   | -0.2  | 0.710633 | 0.97  |
| AGTR2    | -0.2  | 0.710633 | 0.97  |
| AKIRIN1  | -0.2  | 0.710633 | 0.97  |
| ALDOB    | -0.2  | 0.710632 | 0.97  |
| ANK2     | -0.2  | 0.710633 | 0.97  |
| APOC2    | -0.2  | 0.710633 | 0.97  |
| APOF     | -0.2  | 0.710633 | 0.97  |
| APRT     | -0.2  | 0.724555 | 0.97  |
| ARL4A    | -0.2  | 0.710633 | 0.97  |
| BASP1    | -0.2  | 0.724555 | 0.97  |
| C10orf90 | -0.2  | 0.724555 | 0.97  |
| C16orf78 | -0.2  | 0.710632 | 0.97  |
| C19orf69 | -0.2  | 0.724555 | 0.97  |
| C1orf141 | -0.2  | 0.710633 | 0.97  |
| C9orf129 | -0.2  | 0.710633 | 0.97  |
| CCDC64   | -0.2  | 0.724555 | 0.97  |
| CCKBR    | -0.2  | 0.710633 | 0.97  |
| CCM2L    | -0.2  | 0.710633 | 0.97  |
| CD3G     | -0.2  | 0.710633 | 0.97  |
| CDC27    | -0.2  | 0.754877 | 0.972 |
| CDCA5    | -0.2  | 0.724555 | 0.97  |
| CHRA1    | -0.2  | 0.724555 | 0.97  |
| CHRM4    | -0.2  | 0.710633 | 0.97  |
| CLCA4    | -0.2  | 0.710633 | 0.97  |
| CLPSL2   | -0.2  | 0.710633 | 0.97  |
| COL10A1  | -0.2  | 0.724555 | 0.97  |
| CSTF2    | -0.2  | 0.710633 | 0.97  |
| CTSA     | -0.2  | 0.710633 | 0.97  |
| CWF19L2  | -0.2  | 0.724555 | 0.97  |
| DCAF16   | -0.2  | 0.710633 | 0.97  |
| DEFB136  | -0.2  | 0.710633 | 0.97  |
| DLX4     | -0.2  | 0.710633 | 0.97  |
| DRAP1    | -0.2  | 0.738965 | 0.972 |
| ELAVL2   | -0.2  | 0.710633 | 0.97  |
| ELOF1    | -0.2  | 0.710633 | 0.97  |
| ENSA     | -0.2  | 0.710632 | 0.97  |
| EXOC1    | -0.2  | 0.710633 | 0.97  |
| EZH1     | -0.2  | 0.724555 | 0.97  |
| FAM132A  | -0.2  | 0.710633 | 0.97  |

|          |      |          |       |
|----------|------|----------|-------|
| FAM133A  | -0.2 | 0.724555 | 0.97  |
| FAM3D    | -0.2 | 0.710632 | 0.97  |
| FAM78B   | -0.2 | 0.710633 | 0.97  |
| FMO1     | -0.2 | 0.710632 | 0.97  |
| GAL      | -0.2 | 0.724555 | 0.97  |
| GHITM    | -0.2 | 0.710633 | 0.97  |
| GNL1     | -0.2 | 0.710633 | 0.97  |
| GOLGA4   | -0.2 | 0.710633 | 0.97  |
| GOLGA6B  | -0.2 | 0.710633 | 0.97  |
| GP2      | -0.2 | 0.710633 | 0.97  |
| GPR137   | -0.2 | 0.724555 | 0.97  |
| GPR56    | -0.2 | 0.710632 | 0.97  |
| GRID2IP  | -0.2 | 0.738965 | 0.972 |
| GRM4     | -0.2 | 0.710633 | 0.97  |
| GRWD1    | -0.2 | 0.710633 | 0.97  |
| GSDMD    | -0.2 | 0.710633 | 0.97  |
| HAUS1    | -0.2 | 0.724555 | 0.97  |
| HIGD1B   | -0.2 | 0.710633 | 0.97  |
| IFNGR1   | -0.2 | 0.710633 | 0.97  |
| IL9R     | -0.2 | 0.710633 | 0.97  |
| IRF8     | -0.2 | 0.710633 | 0.97  |
| ITFG1    | -0.2 | 0.710633 | 0.97  |
| ITPR2    | -0.2 | 0.710633 | 0.97  |
| JMJD7    | -0.2 | 0.710633 | 0.97  |
| KIF21B   | -0.2 | 0.724555 | 0.97  |
| KLK7     | -0.2 | 0.710632 | 0.97  |
| KPNA2    | -0.2 | 0.710633 | 0.97  |
| KRT6B    | -0.2 | 0.724555 | 0.97  |
| LECT1    | -0.2 | 0.710633 | 0.97  |
| LRP2BP   | -0.2 | 0.710632 | 0.97  |
| LRRC34   | -0.2 | 0.710633 | 0.97  |
| MAP2     | -0.2 | 0.710633 | 0.97  |
| MDM4     | -0.2 | 0.724555 | 0.97  |
| METTL21D | -0.2 | 0.710633 | 0.97  |
| MPND     | -0.2 | 0.710633 | 0.97  |
| MYL3     | -0.2 | 0.724555 | 0.97  |
| NAPSA    | -0.2 | 0.710633 | 0.97  |
| NBPF14   | -0.2 | 0.738965 | 0.972 |
| NCDN     | -0.2 | 0.710632 | 0.97  |
| NR2F6    | -0.2 | 0.724555 | 0.97  |
| NSA2     | -0.2 | 0.724555 | 0.97  |
| NTRK2    | -0.2 | 0.724555 | 0.97  |
| OCIAD1   | -0.2 | 0.710633 | 0.97  |
| OR10S1   | -0.2 | 0.724555 | 0.97  |
| OR9K2    | -0.2 | 0.724555 | 0.97  |
| OSER1    | -0.2 | 0.710633 | 0.97  |
| PCDHA7   | -0.2 | 0.710633 | 0.97  |

|           |      |          |       |
|-----------|------|----------|-------|
| PCDHB7    | -0.2 | 0.710633 | 0.97  |
| PLCZ1     | -0.2 | 0.710633 | 0.97  |
| PMF1      | -0.2 | 0.710633 | 0.97  |
| POLR3G    | -0.2 | 0.710632 | 0.97  |
| POTEB     | -0.2 | 0.710633 | 0.97  |
| POTEB2    | -0.2 | 0.710633 | 0.97  |
| PSORS1C1  | -0.2 | 0.710633 | 0.97  |
| PTPN23    | -0.2 | 0.724555 | 0.97  |
| RAB40A    | -0.2 | 0.710633 | 0.97  |
| RBBP4     | -0.2 | 0.710633 | 0.97  |
| RHPN1     | -0.2 | 0.710633 | 0.97  |
| RNF144B   | -0.2 | 0.710632 | 0.97  |
| RNF180    | -0.2 | 0.710633 | 0.97  |
| RNF185    | -0.2 | 0.710633 | 0.97  |
| RNF26     | -0.2 | 0.710633 | 0.97  |
| RPL6      | -0.2 | 0.710633 | 0.97  |
| SAA2      | -0.2 | 0.724555 | 0.97  |
| SEMA4G    | -0.2 | 0.710633 | 0.97  |
| SEPN1     | -0.2 | 0.710633 | 0.97  |
| SERPINA10 | -0.2 | 0.710633 | 0.97  |
| SERPINE3  | -0.2 | 0.710633 | 0.97  |
| SHC4      | -0.2 | 0.710633 | 0.97  |
| SHISA4    | -0.2 | 0.724555 | 0.97  |
| SLC10A6   | -0.2 | 0.710633 | 0.97  |
| SLC12A1   | -0.2 | 0.710633 | 0.97  |
| SLC2A12   | -0.2 | 0.710633 | 0.97  |
| SMU1      | -0.2 | 0.738965 | 0.972 |
| SNAI1     | -0.2 | 0.710632 | 0.97  |
| SPINK5    | -0.2 | 0.710632 | 0.97  |
| SQSTM1    | -0.2 | 0.710633 | 0.97  |
| SUSD5     | -0.2 | 0.710633 | 0.97  |
| SVIP      | -0.2 | 0.710633 | 0.97  |
| SWT1      | -0.2 | 0.710633 | 0.97  |
| TADA1     | -0.2 | 0.724555 | 0.97  |
| TBC1D2    | -0.2 | 0.710632 | 0.97  |
| TEX13A    | -0.2 | 0.710633 | 0.97  |
| TMEM192   | -0.2 | 0.710633 | 0.97  |
| TMLHE     | -0.2 | 0.710633 | 0.97  |
| TMPRSS13  | -0.2 | 0.710633 | 0.97  |
| TNFSF13B  | -0.2 | 0.710633 | 0.97  |
| TRIOBP    | -0.2 | 0.710633 | 0.97  |
| TRPV3     | -0.2 | 0.724555 | 0.97  |
| UGT1A7    | -0.2 | 0.710633 | 0.97  |
| UQCRC1    | -0.2 | 0.724555 | 0.97  |
| VILL      | -0.2 | 0.710632 | 0.97  |
| VSNL1     | -0.2 | 0.710633 | 0.97  |
| VWA5B2    | -0.2 | 0.710633 | 0.97  |

|           |       |          |       |
|-----------|-------|----------|-------|
| WIF1      | -0.2  | 0.710633 | 0.97  |
| WWC3      | -0.2  | 0.710633 | 0.97  |
| YBX3      | -0.2  | 0.724555 | 0.97  |
| YDJC      | -0.2  | 0.710633 | 0.97  |
| ZBTB14    | -0.2  | 0.710633 | 0.97  |
| ZC3HAV1L  | -0.2  | 0.724555 | 0.97  |
| ZNF350    | -0.2  | 0.710633 | 0.97  |
| ZNF385D   | -0.2  | 0.710633 | 0.97  |
| ZNF584    | -0.2  | 0.710633 | 0.97  |
| ZNF726    | -0.2  | 0.710633 | 0.97  |
| ADCYAP1R1 | -0.19 | 0.723846 | 0.97  |
| AFAP1L1   | -0.19 | 0.723846 | 0.97  |
| ANTXR1    | -0.19 | 0.723846 | 0.97  |
| C11orf71  | -0.19 | 0.723846 | 0.97  |
| C17orf50  | -0.19 | 0.737134 | 0.971 |
| C19orf73  | -0.19 | 0.723846 | 0.97  |
| C1orf216  | -0.19 | 0.723845 | 0.97  |
| C4BPB     | -0.19 | 0.723845 | 0.97  |
| CARD18    | -0.19 | 0.723845 | 0.97  |
| CDK19     | -0.19 | 0.737134 | 0.971 |
| CHRNA1    | -0.19 | 0.723846 | 0.97  |
| CHRNA4    | -0.19 | 0.723845 | 0.97  |
| CPSF4     | -0.19 | 0.723845 | 0.97  |
| CRCT1     | -0.19 | 0.723845 | 0.97  |
| CSGALNAC1 | -0.19 | 0.723846 | 0.97  |
| CTNND2    | -0.19 | 0.737134 | 0.971 |
| DCAKD     | -0.19 | 0.723845 | 0.97  |
| DCLRE1C   | -0.19 | 0.723846 | 0.97  |
| DEFB4A    | -0.19 | 0.723845 | 0.97  |
| DENND1C   | -0.19 | 0.723845 | 0.97  |
| ECM2      | -0.19 | 0.737134 | 0.971 |
| EN1       | -0.19 | 0.723845 | 0.97  |
| ENPP6     | -0.19 | 0.723845 | 0.97  |
| FAM154B   | -0.19 | 0.723845 | 0.97  |
| FBXO15    | -0.19 | 0.723846 | 0.97  |
| FBXW4     | -0.19 | 0.723846 | 0.97  |
| FBXW5     | -0.19 | 0.723846 | 0.97  |
| FCN1      | -0.19 | 0.723846 | 0.97  |
| GADD45B   | -0.19 | 0.723845 | 0.97  |
| GDF6      | -0.19 | 0.723845 | 0.97  |
| GOT1L1    | -0.19 | 0.723845 | 0.97  |
| HBD       | -0.19 | 0.723845 | 0.97  |
| HECTD3    | -0.19 | 0.723845 | 0.97  |
| HSF2BP    | -0.19 | 0.723846 | 0.97  |
| HSFX1     | -0.19 | 0.723845 | 0.97  |
| HSFX2     | -0.19 | 0.723845 | 0.97  |
| HSP90AA1  | -0.19 | 0.723845 | 0.97  |

|            |       |          |       |
|------------|-------|----------|-------|
| IL25       | -0.19 | 0.723845 | 0.97  |
| IL2RA      | -0.19 | 0.723846 | 0.97  |
| IQCF2      | -0.19 | 0.723845 | 0.97  |
| KCNG2      | -0.19 | 0.737134 | 0.971 |
| KIFC1      | -0.19 | 0.723845 | 0.97  |
| KRTAP19-2  | -0.19 | 0.723845 | 0.97  |
| LMF2       | -0.19 | 0.723846 | 0.97  |
| LNX2       | -0.19 | 0.723846 | 0.97  |
| LOC1001296 | -0.19 | 0.750963 | 0.972 |
| LOC643802  | -0.19 | 0.737133 | 0.971 |
| LRRTM3     | -0.19 | 0.723846 | 0.97  |
| MAGEA1     | -0.19 | 0.723846 | 0.97  |
| MIOS       | -0.19 | 0.737133 | 0.971 |
| MRPL32     | -0.19 | 0.723846 | 0.97  |
| MRPS11     | -0.19 | 0.723845 | 0.97  |
| MYO18A     | -0.19 | 0.723845 | 0.97  |
| NAB2       | -0.19 | 0.723845 | 0.97  |
| NBPF3      | -0.19 | 0.723846 | 0.97  |
| NKAIN2     | -0.19 | 0.723845 | 0.97  |
| NME9       | -0.19 | 0.723845 | 0.97  |
| NMT2       | -0.19 | 0.723846 | 0.97  |
| NR1I3      | -0.19 | 0.723845 | 0.97  |
| NTN5       | -0.19 | 0.723846 | 0.97  |
| NUDT21     | -0.19 | 0.737133 | 0.971 |
| NUDT4      | -0.19 | 0.723845 | 0.97  |
| OGG1       | -0.19 | 0.723845 | 0.97  |
| OR2T34     | -0.19 | 0.723845 | 0.97  |
| OR51A2     | -0.19 | 0.723845 | 0.97  |
| OR51B6     | -0.19 | 0.723845 | 0.97  |
| OR5B21     | -0.19 | 0.723845 | 0.97  |
| OR5K1      | -0.19 | 0.737134 | 0.971 |
| OR8B4      | -0.19 | 0.737134 | 0.971 |
| PCBD1      | -0.19 | 0.723846 | 0.97  |
| PCDHAC2    | -0.19 | 0.723845 | 0.97  |
| PCDHGB7    | -0.19 | 0.737134 | 0.971 |
| PDE1C      | -0.19 | 0.723846 | 0.97  |
| PLA2G2D    | -0.19 | 0.723845 | 0.97  |
| PRAC2      | -0.19 | 0.737133 | 0.971 |
| PRAMEF17   | -0.19 | 0.723845 | 0.97  |
| PRAMEF2    | -0.19 | 0.723845 | 0.97  |
| PRKCA      | -0.19 | 0.723845 | 0.97  |
| RAET1E     | -0.19 | 0.723845 | 0.97  |
| RGCC       | -0.19 | 0.723846 | 0.97  |
| RPL32      | -0.19 | 0.723845 | 0.97  |
| RPS6KA3    | -0.19 | 0.723846 | 0.97  |
| SAMD14     | -0.19 | 0.723845 | 0.97  |
| SATL1      | -0.19 | 0.723845 | 0.97  |

|            |       |          |       |
|------------|-------|----------|-------|
| SELL       | -0.19 | 0.723846 | 0.97  |
| SFT2D2     | -0.19 | 0.750963 | 0.972 |
| SLA2       | -0.19 | 0.723846 | 0.97  |
| SLC12A9    | -0.19 | 0.723845 | 0.97  |
| SLC25A45   | -0.19 | 0.723846 | 0.97  |
| SLCO3A1    | -0.19 | 0.723845 | 0.97  |
| SPATA21    | -0.19 | 0.723845 | 0.97  |
| SYNPO2L    | -0.19 | 0.723845 | 0.97  |
| TINF2      | -0.19 | 0.723845 | 0.97  |
| TLX3       | -0.19 | 0.723845 | 0.97  |
| TNFSF13    | -0.19 | 0.723846 | 0.97  |
| TRAF1      | -0.19 | 0.723845 | 0.97  |
| TSEN2      | -0.19 | 0.737133 | 0.971 |
| TSPAN10    | -0.19 | 0.750963 | 0.972 |
| TTC23      | -0.19 | 0.723846 | 0.97  |
| TTC34      | -0.19 | 0.723846 | 0.97  |
| USP45      | -0.19 | 0.723845 | 0.97  |
| WFDC3      | -0.19 | 0.723845 | 0.97  |
| WFIKKN2    | -0.19 | 0.723846 | 0.97  |
| YIPF2      | -0.19 | 0.723845 | 0.97  |
| ZMYM1      | -0.19 | 0.723845 | 0.97  |
| ZRANB1     | -0.19 | 0.723845 | 0.97  |
| ZSCAN21    | -0.19 | 0.723846 | 0.97  |
| ANKHD1-EIF | -0.18 | 0.737201 | 0.971 |
| ARHGEF5    | -0.18 | 0.749835 | 0.972 |
| ARL14      | -0.18 | 0.737201 | 0.971 |
| ATP9B      | -0.18 | 0.737201 | 0.971 |
| BAAT       | -0.18 | 0.737201 | 0.971 |
| C12orf75   | -0.18 | 0.763013 | 0.972 |
| C14orf180  | -0.18 | 0.737201 | 0.971 |
| C17orf99   | -0.18 | 0.737201 | 0.971 |
| C1orf177   | -0.18 | 0.749836 | 0.972 |
| C1orf21    | -0.18 | 0.737201 | 0.971 |
| C22orf24   | -0.18 | 0.737201 | 0.971 |
| C3orf80    | -0.18 | 0.737201 | 0.971 |
| C8G        | -0.18 | 0.737201 | 0.971 |
| CANT1      | -0.18 | 0.763013 | 0.972 |
| CCDC176    | -0.18 | 0.749836 | 0.972 |
| CD300LB    | -0.18 | 0.737201 | 0.971 |
| CDC42BPG   | -0.18 | 0.749836 | 0.972 |
| CEL        | -0.18 | 0.737201 | 0.971 |
| CEMP1      | -0.18 | 0.737201 | 0.971 |
| CHP1       | -0.18 | 0.737201 | 0.971 |
| CLIC5      | -0.18 | 0.737201 | 0.971 |
| CPA2       | -0.18 | 0.737201 | 0.971 |
| CSNK2A3    | -0.18 | 0.737201 | 0.971 |
| DEFB1      | -0.18 | 0.737201 | 0.971 |

|           |       |          |       |
|-----------|-------|----------|-------|
| DEFB132   | -0.18 | 0.737201 | 0.971 |
| DES       | -0.18 | 0.737201 | 0.971 |
| DNAJC3    | -0.18 | 0.737201 | 0.971 |
| DOPEY2    | -0.18 | 0.737201 | 0.971 |
| ELP3      | -0.18 | 0.737201 | 0.971 |
| ENPEP     | -0.18 | 0.737201 | 0.971 |
| EPS8L3    | -0.18 | 0.749835 | 0.972 |
| ESPNL     | -0.18 | 0.749835 | 0.972 |
| FABP7     | -0.18 | 0.737201 | 0.971 |
| FAM104B   | -0.18 | 0.737201 | 0.971 |
| FAM114A1  | -0.18 | 0.737201 | 0.971 |
| FAM98C    | -0.18 | 0.749835 | 0.972 |
| FAM9A     | -0.18 | 0.749836 | 0.972 |
| GGA3      | -0.18 | 0.749835 | 0.972 |
| GJA3      | -0.18 | 0.737201 | 0.971 |
| GLIS2     | -0.18 | 0.737201 | 0.971 |
| GOLGA8M   | -0.18 | 0.737201 | 0.971 |
| GPX5      | -0.18 | 0.737201 | 0.971 |
| GTF2IRD2B | -0.18 | 0.737201 | 0.971 |
| H1FNT     | -0.18 | 0.737201 | 0.971 |
| HNRNPC    | -0.18 | 0.737201 | 0.971 |
| HNRNPLL   | -0.18 | 0.737201 | 0.971 |
| IBTK      | -0.18 | 0.737201 | 0.971 |
| IL18      | -0.18 | 0.737201 | 0.971 |
| INSRR     | -0.18 | 0.737201 | 0.971 |
| ITGB4     | -0.18 | 0.737201 | 0.971 |
| KIF13A    | -0.18 | 0.749835 | 0.972 |
| KLK11     | -0.18 | 0.737201 | 0.971 |
| KRTAP15-1 | -0.18 | 0.737201 | 0.971 |
| LELP1     | -0.18 | 0.737201 | 0.971 |
| MAP1LC3C  | -0.18 | 0.737201 | 0.971 |
| MMP26     | -0.18 | 0.737201 | 0.971 |
| MRPS16    | -0.18 | 0.737201 | 0.971 |
| MXD1      | -0.18 | 0.737201 | 0.971 |
| MYH1      | -0.18 | 0.749836 | 0.972 |
| NAA40     | -0.18 | 0.763013 | 0.972 |
| NKX6-1    | -0.18 | 0.763013 | 0.972 |
| NOD2      | -0.18 | 0.737201 | 0.971 |
| NPM2      | -0.18 | 0.737201 | 0.971 |
| OBP2A     | -0.18 | 0.737201 | 0.971 |
| OR2M3     | -0.18 | 0.737201 | 0.971 |
| OR5D13    | -0.18 | 0.737201 | 0.971 |
| OR8H1     | -0.18 | 0.737201 | 0.971 |
| ORC4      | -0.18 | 0.749836 | 0.972 |
| PARVB     | -0.18 | 0.737201 | 0.971 |
| PGF       | -0.18 | 0.749836 | 0.972 |
| PHKG1     | -0.18 | 0.737201 | 0.971 |

|           |       |          |       |
|-----------|-------|----------|-------|
| PIF1      | -0.18 | 0.737201 | 0.971 |
| PNPLA4    | -0.18 | 0.737201 | 0.971 |
| POM121L12 | -0.18 | 0.737201 | 0.971 |
| POMGNT2   | -0.18 | 0.737201 | 0.971 |
| PPL       | -0.18 | 0.737201 | 0.971 |
| PRR13     | -0.18 | 0.737201 | 0.971 |
| PRTN3     | -0.18 | 0.737201 | 0.971 |
| PTK2B     | -0.18 | 0.737201 | 0.971 |
| PTMA      | -0.18 | 0.749835 | 0.972 |
| R3HDML    | -0.18 | 0.737201 | 0.971 |
| RELL1     | -0.18 | 0.737201 | 0.971 |
| RNF40     | -0.18 | 0.749835 | 0.972 |
| RPTN      | -0.18 | 0.737201 | 0.971 |
| S100A14   | -0.18 | 0.737201 | 0.971 |
| S100B     | -0.18 | 0.737201 | 0.971 |
| SCGB1A1   | -0.18 | 0.737201 | 0.971 |
| SCIN      | -0.18 | 0.737201 | 0.971 |
| SCN2B     | -0.18 | 0.749835 | 0.972 |
| SHC2      | -0.18 | 0.737201 | 0.971 |
| SHCBP1    | -0.18 | 0.737201 | 0.971 |
| SIM1      | -0.18 | 0.737201 | 0.971 |
| SIN3A     | -0.18 | 0.749835 | 0.972 |
| SLCO1A2   | -0.18 | 0.737201 | 0.971 |
| SMTNL1    | -0.18 | 0.737201 | 0.971 |
| SOWAHC    | -0.18 | 0.737201 | 0.971 |
| SPIN4     | -0.18 | 0.737201 | 0.971 |
| SPRR2F    | -0.18 | 0.749836 | 0.972 |
| SSRP1     | -0.18 | 0.749836 | 0.972 |
| STOML2    | -0.18 | 0.749835 | 0.972 |
| TEX40     | -0.18 | 0.737201 | 0.971 |
| TM9SF3    | -0.18 | 0.737201 | 0.971 |
| TMA16     | -0.18 | 0.737201 | 0.971 |
| TMEM164   | -0.18 | 0.737201 | 0.971 |
| TMEM38B   | -0.18 | 0.737201 | 0.971 |
| TMEM59L   | -0.18 | 0.737201 | 0.971 |
| TNFAIP8   | -0.18 | 0.749836 | 0.972 |
| TPRN      | -0.18 | 0.737201 | 0.971 |
| TREX2     | -0.18 | 0.749836 | 0.972 |
| TRIM67    | -0.18 | 0.737201 | 0.971 |
| TSPAN31   | -0.18 | 0.737201 | 0.971 |
| TTC6      | -0.18 | 0.737201 | 0.971 |
| VN1R1     | -0.18 | 0.737201 | 0.971 |
| WDR18     | -0.18 | 0.763013 | 0.972 |
| WDR41     | -0.18 | 0.737201 | 0.971 |
| WNT8B     | -0.18 | 0.737201 | 0.971 |
| XG        | -0.18 | 0.737201 | 0.971 |
| ZBTB48    | -0.18 | 0.737201 | 0.971 |

|          |       |          |       |
|----------|-------|----------|-------|
| ZFP3     | -0.18 | 0.737201 | 0.971 |
| ZFP37    | -0.18 | 0.737201 | 0.971 |
| ZNF311   | -0.18 | 0.737201 | 0.971 |
| ZNF506   | -0.18 | 0.737201 | 0.971 |
| ZNF699   | -0.18 | 0.737201 | 0.971 |
| ZNF883   | -0.18 | 0.737201 | 0.971 |
| ZUFSP    | -0.18 | 0.737201 | 0.971 |
| ADAMTS3  | -0.17 | 0.750509 | 0.972 |
| AIF1L    | -0.17 | 0.750509 | 0.972 |
| AKR1B15  | -0.17 | 0.750509 | 0.972 |
| ARHGAP42 | -0.17 | 0.750509 | 0.972 |
| ARMCX4   | -0.17 | 0.750509 | 0.972 |
| ASB13    | -0.17 | 0.750509 | 0.972 |
| ATP5F1   | -0.17 | 0.750509 | 0.972 |
| BIRC5    | -0.17 | 0.775102 | 0.972 |
| BMP5     | -0.17 | 0.750509 | 0.972 |
| BTBD8    | -0.17 | 0.750509 | 0.972 |
| C15orf40 | -0.17 | 0.750509 | 0.972 |
| C16orf93 | -0.17 | 0.750509 | 0.972 |
| C1orf228 | -0.17 | 0.750509 | 0.972 |
| CADPS    | -0.17 | 0.762559 | 0.972 |
| CASS4    | -0.17 | 0.750509 | 0.972 |
| CCDC71L  | -0.17 | 0.775102 | 0.972 |
| CCL22    | -0.17 | 0.750509 | 0.972 |
| CD24     | -0.17 | 0.762559 | 0.972 |
| CFI      | -0.17 | 0.750509 | 0.972 |
| CHRNA9   | -0.17 | 0.762559 | 0.972 |
| CSNK2B   | -0.17 | 0.76256  | 0.972 |
| CUL5     | -0.17 | 0.750509 | 0.972 |
| CYP11A1  | -0.17 | 0.750509 | 0.972 |
| DDAH1    | -0.17 | 0.750509 | 0.972 |
| DDX10    | -0.17 | 0.750509 | 0.972 |
| DHRS3    | -0.17 | 0.750509 | 0.972 |
| DNAJA1   | -0.17 | 0.762559 | 0.972 |
| EIF2B3   | -0.17 | 0.762559 | 0.972 |
| ENTPD8   | -0.17 | 0.750509 | 0.972 |
| EOGT     | -0.17 | 0.750509 | 0.972 |
| EXT1     | -0.17 | 0.750509 | 0.972 |
| FAM3A    | -0.17 | 0.750509 | 0.972 |
| FAM73A   | -0.17 | 0.750509 | 0.972 |
| FBR3     | -0.17 | 0.762559 | 0.972 |
| FLG2     | -0.17 | 0.750509 | 0.972 |
| FRG2B    | -0.17 | 0.750509 | 0.972 |
| GLOD4    | -0.17 | 0.750509 | 0.972 |
| GPR37L1  | -0.17 | 0.750509 | 0.972 |
| GRIN2B   | -0.17 | 0.750509 | 0.972 |
| GTSE1    | -0.17 | 0.750509 | 0.972 |

|           |       |          |       |
|-----------|-------|----------|-------|
| H1FO      | -0.17 | 0.750509 | 0.972 |
| HCK       | -0.17 | 0.762559 | 0.972 |
| HDAC2     | -0.17 | 0.750509 | 0.972 |
| HDHD1     | -0.17 | 0.750509 | 0.972 |
| HINT3     | -0.17 | 0.750509 | 0.972 |
| HMCES     | -0.17 | 0.750509 | 0.972 |
| IRF7      | -0.17 | 0.750509 | 0.972 |
| IRS4      | -0.17 | 0.762559 | 0.972 |
| KATNA1    | -0.17 | 0.750509 | 0.972 |
| KRT3      | -0.17 | 0.762559 | 0.972 |
| LGI4      | -0.17 | 0.750509 | 0.972 |
| LILRA5    | -0.17 | 0.762559 | 0.972 |
| MED11     | -0.17 | 0.750509 | 0.972 |
| METTL21A  | -0.17 | 0.750509 | 0.972 |
| MFAP2     | -0.17 | 0.750509 | 0.972 |
| MKX       | -0.17 | 0.750509 | 0.972 |
| MSN       | -0.17 | 0.750509 | 0.972 |
| MYBBP1A   | -0.17 | 0.750509 | 0.972 |
| MYOCD     | -0.17 | 0.750509 | 0.972 |
| NANP      | -0.17 | 0.750509 | 0.972 |
| NFX1      | -0.17 | 0.750509 | 0.972 |
| NME1      | -0.17 | 0.750509 | 0.972 |
| NOBOX     | -0.17 | 0.762559 | 0.972 |
| NR2E3     | -0.17 | 0.750509 | 0.972 |
| NUTM1     | -0.17 | 0.750509 | 0.972 |
| PALM2-AKA | -0.17 | 0.750509 | 0.972 |
| PATL1     | -0.17 | 0.750509 | 0.972 |
| PCDHA1    | -0.17 | 0.750509 | 0.972 |
| PCDHGB3   | -0.17 | 0.762559 | 0.972 |
| PGP       | -0.17 | 0.762559 | 0.972 |
| PIGS      | -0.17 | 0.750509 | 0.972 |
| PKP1      | -0.17 | 0.750509 | 0.972 |
| PPP1R14A  | -0.17 | 0.750509 | 0.972 |
| PTBP1     | -0.17 | 0.750509 | 0.972 |
| PTPN3     | -0.17 | 0.750509 | 0.972 |
| RAB34     | -0.17 | 0.750509 | 0.972 |
| REM1      | -0.17 | 0.750509 | 0.972 |
| RGS4      | -0.17 | 0.750509 | 0.972 |
| RHOD      | -0.17 | 0.750509 | 0.972 |
| RPL13A    | -0.17 | 0.750509 | 0.972 |
| SAGE1     | -0.17 | 0.750509 | 0.972 |
| SEC22A    | -0.17 | 0.750509 | 0.972 |
| SKOR1     | -0.17 | 0.750509 | 0.972 |
| SLC12A5   | -0.17 | 0.762559 | 0.972 |
| SLC1A1    | -0.17 | 0.750509 | 0.972 |
| SMTNL2    | -0.17 | 0.750509 | 0.972 |
| SPATA19   | -0.17 | 0.750509 | 0.972 |

|           |       |          |       |
|-----------|-------|----------|-------|
| SRRM4     | -0.17 | 0.750509 | 0.972 |
| ST6GALNAC | -0.17 | 0.750509 | 0.972 |
| STX19     | -0.17 | 0.750509 | 0.972 |
| STXBP2    | -0.17 | 0.750509 | 0.972 |
| TAS2R4    | -0.17 | 0.750509 | 0.972 |
| TNNI2     | -0.17 | 0.750509 | 0.972 |
| TRMT61B   | -0.17 | 0.762559 | 0.972 |
| TSTD1     | -0.17 | 0.750509 | 0.972 |
| USP49     | -0.17 | 0.750509 | 0.972 |
| VCL       | -0.17 | 0.750509 | 0.972 |
| VPS33B    | -0.17 | 0.750509 | 0.972 |
| VSIG1     | -0.17 | 0.750509 | 0.972 |
| ZKSCAN5   | -0.17 | 0.750509 | 0.972 |
| ZNF205    | -0.17 | 0.762559 | 0.972 |
| ZNF267    | -0.17 | 0.750509 | 0.972 |
| ZNF425    | -0.17 | 0.750509 | 0.972 |
| ZNRF2     | -0.17 | 0.750509 | 0.972 |
| ZW10      | -0.17 | 0.750509 | 0.972 |
| ABRACL    | -0.16 | 0.763971 | 0.972 |
| ADNP      | -0.16 | 0.76397  | 0.972 |
| ARAP3     | -0.16 | 0.76397  | 0.972 |
| ARHGEF18  | -0.16 | 0.763971 | 0.972 |
| ASPRV1    | -0.16 | 0.76397  | 0.972 |
| ATOX1     | -0.16 | 0.76397  | 0.972 |
| BAD       | -0.16 | 0.76397  | 0.972 |
| BOLA1     | -0.16 | 0.763971 | 0.972 |
| BUD13     | -0.16 | 0.775458 | 0.972 |
| C10orf91  | -0.16 | 0.76397  | 0.972 |
| C19orf47  | -0.16 | 0.763971 | 0.972 |
| C1orf189  | -0.16 | 0.76397  | 0.972 |
| C4orf27   | -0.16 | 0.76397  | 0.972 |
| CBLN4     | -0.16 | 0.76397  | 0.972 |
| CC2D1A    | -0.16 | 0.76397  | 0.972 |
| CCDC180   | -0.16 | 0.775458 | 0.972 |
| CCDC77    | -0.16 | 0.76397  | 0.972 |
| CDKL1     | -0.16 | 0.763971 | 0.972 |
| CDY2A     | -0.16 | 0.763971 | 0.972 |
| CDY2B     | -0.16 | 0.763971 | 0.972 |
| CES5A     | -0.16 | 0.76397  | 0.972 |
| CHI3L1    | -0.16 | 0.76397  | 0.972 |
| CLEC18B   | -0.16 | 0.76397  | 0.972 |
| CLINT1    | -0.16 | 0.76397  | 0.972 |
| CT62      | -0.16 | 0.76397  | 0.972 |
| DCAF4L1   | -0.16 | 0.763971 | 0.972 |
| DDX43     | -0.16 | 0.775458 | 0.972 |
| DIRAS3    | -0.16 | 0.76397  | 0.972 |
| DUPD1     | -0.16 | 0.775458 | 0.972 |

|          |       |          |       |
|----------|-------|----------|-------|
| EIF4EBP1 | -0.16 | 0.763971 | 0.972 |
| EPDR1    | -0.16 | 0.76397  | 0.972 |
| EXD3     | -0.16 | 0.76397  | 0.972 |
| FAM179B  | -0.16 | 0.763971 | 0.972 |
| FAM71A   | -0.16 | 0.76397  | 0.972 |
| FAM81B   | -0.16 | 0.763971 | 0.972 |
| FFAR4    | -0.16 | 0.763971 | 0.972 |
| FITM1    | -0.16 | 0.76397  | 0.972 |
| FKBP6    | -0.16 | 0.76397  | 0.972 |
| FYN      | -0.16 | 0.763971 | 0.972 |
| GALNT5   | -0.16 | 0.763971 | 0.972 |
| GAREM    | -0.16 | 0.76397  | 0.972 |
| GCFC2    | -0.16 | 0.76397  | 0.972 |
| GOLGA8R  | -0.16 | 0.76397  | 0.972 |
| GPATCH1  | -0.16 | 0.76397  | 0.972 |
| GPR128   | -0.16 | 0.76397  | 0.972 |
| GPS2     | -0.16 | 0.763971 | 0.972 |
| HAUS5    | -0.16 | 0.775458 | 0.972 |
| HGFAC    | -0.16 | 0.76397  | 0.972 |
| HIVEP2   | -0.16 | 0.76397  | 0.972 |
| HPDL     | -0.16 | 0.76397  | 0.972 |
| HYAL2    | -0.16 | 0.76397  | 0.972 |
| IDO2     | -0.16 | 0.76397  | 0.972 |
| IDS      | -0.16 | 0.775458 | 0.972 |
| ISOC2    | -0.16 | 0.76397  | 0.972 |
| KCNK7    | -0.16 | 0.76397  | 0.972 |
| KIAA0101 | -0.16 | 0.763971 | 0.972 |
| KLK10    | -0.16 | 0.76397  | 0.972 |
| LCE3D    | -0.16 | 0.76397  | 0.972 |
| LILRA4   | -0.16 | 0.76397  | 0.972 |
| LIM2     | -0.16 | 0.76397  | 0.972 |
| MAGEB3   | -0.16 | 0.76397  | 0.972 |
| MAP3K5   | -0.16 | 0.76397  | 0.972 |
| MCOLN1   | -0.16 | 0.787301 | 0.972 |
| MMAB     | -0.16 | 0.76397  | 0.972 |
| MND1     | -0.16 | 0.763971 | 0.972 |
| MRPL1    | -0.16 | 0.775458 | 0.972 |
| MXRA5    | -0.16 | 0.76397  | 0.972 |
| NBPF16   | -0.16 | 0.787301 | 0.972 |
| NKX6-3   | -0.16 | 0.76397  | 0.972 |
| NLRP3    | -0.16 | 0.76397  | 0.972 |
| NUDCD3   | -0.16 | 0.76397  | 0.972 |
| NUP50    | -0.16 | 0.76397  | 0.972 |
| OR10H5   | -0.16 | 0.775458 | 0.972 |
| OR2T1    | -0.16 | 0.76397  | 0.972 |
| OR4X1    | -0.16 | 0.76397  | 0.972 |
| OR6B2    | -0.16 | 0.76397  | 0.972 |

|          |       |          |       |
|----------|-------|----------|-------|
| OR7A10   | -0.16 | 0.76397  | 0.972 |
| OR7A17   | -0.16 | 0.763971 | 0.972 |
| P2RX2    | -0.16 | 0.76397  | 0.972 |
| PACSIN2  | -0.16 | 0.76397  | 0.972 |
| PARVA    | -0.16 | 0.76397  | 0.972 |
| PAX3     | -0.16 | 0.775458 | 0.972 |
| PCNXL4   | -0.16 | 0.800511 | 0.973 |
| PDE11A   | -0.16 | 0.76397  | 0.972 |
| PLEKHG5  | -0.16 | 0.76397  | 0.972 |
| PMM2     | -0.16 | 0.76397  | 0.972 |
| PPDPF    | -0.16 | 0.76397  | 0.972 |
| PRKAR1A  | -0.16 | 0.76397  | 0.972 |
| PTPRCAP  | -0.16 | 0.76397  | 0.972 |
| PTPRH    | -0.16 | 0.76397  | 0.972 |
| RAB23    | -0.16 | 0.76397  | 0.972 |
| RASSF4   | -0.16 | 0.76397  | 0.972 |
| RCC1     | -0.16 | 0.787301 | 0.972 |
| RFX7     | -0.16 | 0.763971 | 0.972 |
| RGL1     | -0.16 | 0.775458 | 0.972 |
| S100A1   | -0.16 | 0.76397  | 0.972 |
| SCP2D1   | -0.16 | 0.76397  | 0.972 |
| SCRT2    | -0.16 | 0.763971 | 0.972 |
| SLAMF8   | -0.16 | 0.76397  | 0.972 |
| SLC22A11 | -0.16 | 0.76397  | 0.972 |
| SLC25A14 | -0.16 | 0.76397  | 0.972 |
| SLC35B4  | -0.16 | 0.76397  | 0.972 |
| SLC39A13 | -0.16 | 0.76397  | 0.972 |
| SLC6A4   | -0.16 | 0.763971 | 0.972 |
| SOX18    | -0.16 | 0.76397  | 0.972 |
| SPRED1   | -0.16 | 0.775458 | 0.972 |
| SRD5A1   | -0.16 | 0.76397  | 0.972 |
| SRPR     | -0.16 | 0.76397  | 0.972 |
| SS18     | -0.16 | 0.76397  | 0.972 |
| STEAP3   | -0.16 | 0.76397  | 0.972 |
| SYCP3    | -0.16 | 0.76397  | 0.972 |
| TERF1    | -0.16 | 0.763971 | 0.972 |
| TMTC4    | -0.16 | 0.76397  | 0.972 |
| TREM1    | -0.16 | 0.76397  | 0.972 |
| TRPS1    | -0.16 | 0.76397  | 0.972 |
| TSHZ3    | -0.16 | 0.76397  | 0.972 |
| UAP1L1   | -0.16 | 0.76397  | 0.972 |
| UMOD     | -0.16 | 0.76397  | 0.972 |
| WDR6     | -0.16 | 0.76397  | 0.972 |
| WISP2    | -0.16 | 0.775458 | 0.972 |
| ZNF599   | -0.16 | 0.775458 | 0.972 |
| ZSCAN9   | -0.16 | 0.76397  | 0.972 |
| ACADM    | -0.15 | 0.777427 | 0.972 |

|          |       |          |       |
|----------|-------|----------|-------|
| ACD      | -0.15 | 0.777426 | 0.972 |
| ACMSD    | -0.15 | 0.777426 | 0.972 |
| ADAM29   | -0.15 | 0.777426 | 0.972 |
| ADCY9    | -0.15 | 0.777426 | 0.972 |
| ADH6     | -0.15 | 0.777426 | 0.972 |
| ALG9     | -0.15 | 0.777426 | 0.972 |
| ALOX5AP  | -0.15 | 0.777426 | 0.972 |
| AMER3    | -0.15 | 0.777427 | 0.972 |
| ANKRD24  | -0.15 | 0.788329 | 0.972 |
| ARHGDIG  | -0.15 | 0.777427 | 0.972 |
| ARHGEF12 | -0.15 | 0.777426 | 0.972 |
| ASB11    | -0.15 | 0.777426 | 0.972 |
| ATAD3B   | -0.15 | 0.777426 | 0.972 |
| ATP12A   | -0.15 | 0.788329 | 0.972 |
| ATP5G3   | -0.15 | 0.777426 | 0.972 |
| BANK1    | -0.15 | 0.777426 | 0.972 |
| C11orf16 | -0.15 | 0.777426 | 0.972 |
| C13orf45 | -0.15 | 0.788328 | 0.972 |
| C1orf87  | -0.15 | 0.777426 | 0.972 |
| C21orf91 | -0.15 | 0.777426 | 0.972 |
| C5orf48  | -0.15 | 0.777427 | 0.972 |
| CAPN7    | -0.15 | 0.777426 | 0.972 |
| CASKIN1  | -0.15 | 0.777426 | 0.972 |
| CDH4     | -0.15 | 0.777426 | 0.972 |
| CEP57    | -0.15 | 0.777426 | 0.972 |
| CES2     | -0.15 | 0.777427 | 0.972 |
| CIB4     | -0.15 | 0.788329 | 0.972 |
| CLEC3B   | -0.15 | 0.788328 | 0.972 |
| CMTM8    | -0.15 | 0.788328 | 0.972 |
| COMP     | -0.15 | 0.777426 | 0.972 |
| CORIN    | -0.15 | 0.777426 | 0.972 |
| CREB3L3  | -0.15 | 0.777426 | 0.972 |
| CRISP1   | -0.15 | 0.777426 | 0.972 |
| CST5     | -0.15 | 0.777426 | 0.972 |
| DEFB104A | -0.15 | 0.79949  | 0.973 |
| DEFB104B | -0.15 | 0.79949  | 0.973 |
| EIF4E2   | -0.15 | 0.788329 | 0.972 |
| ENPP5    | -0.15 | 0.777426 | 0.972 |
| EYA2     | -0.15 | 0.788329 | 0.972 |
| FABP9    | -0.15 | 0.788328 | 0.972 |
| FAM127C  | -0.15 | 0.777426 | 0.972 |
| FAM180A  | -0.15 | 0.788329 | 0.972 |
| FAM200A  | -0.15 | 0.788329 | 0.972 |
| FBXL12   | -0.15 | 0.777426 | 0.972 |
| FERD3L   | -0.15 | 0.788329 | 0.972 |
| FICD     | -0.15 | 0.777426 | 0.972 |
| FOXI1    | -0.15 | 0.777426 | 0.972 |

|           |       |          |       |
|-----------|-------|----------|-------|
| FSCB      | -0.15 | 0.777426 | 0.972 |
| FXYD7     | -0.15 | 0.788329 | 0.972 |
| GAS1      | -0.15 | 0.777426 | 0.972 |
| GLYCTK    | -0.15 | 0.777426 | 0.972 |
| GNPTG     | -0.15 | 0.777426 | 0.972 |
| GOLPH3L   | -0.15 | 0.777426 | 0.972 |
| GORASP2   | -0.15 | 0.777426 | 0.972 |
| GPC2      | -0.15 | 0.788329 | 0.972 |
| GPS1      | -0.15 | 0.777426 | 0.972 |
| GPT2      | -0.15 | 0.777426 | 0.972 |
| H2AFY2    | -0.15 | 0.777426 | 0.972 |
| HCRTR2    | -0.15 | 0.777426 | 0.972 |
| HDHD2     | -0.15 | 0.777426 | 0.972 |
| HELZ2     | -0.15 | 0.777427 | 0.972 |
| HIPK2     | -0.15 | 0.777426 | 0.972 |
| HIST1H2AM | -0.15 | 0.777426 | 0.972 |
| HLA-DQB1  | -0.15 | 0.777426 | 0.972 |
| HNRNPA3   | -0.15 | 0.777426 | 0.972 |
| HOXB8     | -0.15 | 0.777426 | 0.972 |
| HPD       | -0.15 | 0.777426 | 0.972 |
| IL1F10    | -0.15 | 0.777426 | 0.972 |
| IQCF1     | -0.15 | 0.777426 | 0.972 |
| KCNS2     | -0.15 | 0.777426 | 0.972 |
| KIAA1462  | -0.15 | 0.777426 | 0.972 |
| KIF2A     | -0.15 | 0.777426 | 0.972 |
| KRTAP27-1 | -0.15 | 0.777427 | 0.972 |
| KRTAP4-6  | -0.15 | 0.788329 | 0.972 |
| LANCL1    | -0.15 | 0.777426 | 0.972 |
| LEP       | -0.15 | 0.777426 | 0.972 |
| LHX2      | -0.15 | 0.777427 | 0.972 |
| LIMK1     | -0.15 | 0.777426 | 0.972 |
| LMCD1     | -0.15 | 0.777426 | 0.972 |
| LYPLA2    | -0.15 | 0.777426 | 0.972 |
| MAL       | -0.15 | 0.788328 | 0.972 |
| MAN2A1    | -0.15 | 0.777426 | 0.972 |
| MAPK8IP3  | -0.15 | 0.788328 | 0.972 |
| MFI2      | -0.15 | 0.788328 | 0.972 |
| MIF       | -0.15 | 0.777427 | 0.972 |
| MLH3      | -0.15 | 0.777426 | 0.972 |
| MNAT1     | -0.15 | 0.777427 | 0.972 |
| MNDA      | -0.15 | 0.777426 | 0.972 |
| MRI1      | -0.15 | 0.777427 | 0.972 |
| MYNN      | -0.15 | 0.799491 | 0.973 |
| OR2T10    | -0.15 | 0.788328 | 0.972 |
| OR51A7    | -0.15 | 0.777426 | 0.972 |
| OR8I2     | -0.15 | 0.777426 | 0.972 |
| ORMDL3    | -0.15 | 0.777426 | 0.972 |

|           |       |          |       |
|-----------|-------|----------|-------|
| PIP5K1B   | -0.15 | 0.777427 | 0.972 |
| PLCB2     | -0.15 | 0.788328 | 0.972 |
| PLD2      | -0.15 | 0.777426 | 0.972 |
| PLEKHF1   | -0.15 | 0.777426 | 0.972 |
| POLD4     | -0.15 | 0.777426 | 0.972 |
| RAB7L1    | -0.15 | 0.777426 | 0.972 |
| RASGEF1A  | -0.15 | 0.777427 | 0.972 |
| RAX2      | -0.15 | 0.788329 | 0.972 |
| REG4      | -0.15 | 0.777426 | 0.972 |
| RNF125    | -0.15 | 0.777426 | 0.972 |
| ROCK1     | -0.15 | 0.777426 | 0.972 |
| RPH3AL    | -0.15 | 0.777426 | 0.972 |
| RUNX3     | -0.15 | 0.788329 | 0.972 |
| RYR2      | -0.15 | 0.777426 | 0.972 |
| SAMD4B    | -0.15 | 0.812111 | 0.973 |
| SLC26A2   | -0.15 | 0.777426 | 0.972 |
| SLC33A1   | -0.15 | 0.777426 | 0.972 |
| SLC6A6    | -0.15 | 0.777426 | 0.972 |
| STBD1     | -0.15 | 0.777426 | 0.972 |
| SUGP2     | -0.15 | 0.777426 | 0.972 |
| TAS1R2    | -0.15 | 0.777426 | 0.972 |
| TBX10     | -0.15 | 0.777426 | 0.972 |
| TBX4      | -0.15 | 0.777427 | 0.972 |
| TMEM110   | -0.15 | 0.777426 | 0.972 |
| TNFRSF11A | -0.15 | 0.777426 | 0.972 |
| TNNC1     | -0.15 | 0.777426 | 0.972 |
| TPMT      | -0.15 | 0.777426 | 0.972 |
| TRAK1     | -0.15 | 0.777426 | 0.972 |
| TRIM49    | -0.15 | 0.777426 | 0.972 |
| UNC93A    | -0.15 | 0.799491 | 0.973 |
| ZFP92     | -0.15 | 0.777426 | 0.972 |
| ZNF253    | -0.15 | 0.777426 | 0.972 |
| ZNF697    | -0.15 | 0.788329 | 0.972 |
| AACS      | -0.14 | 0.790934 | 0.972 |
| ABCC12    | -0.14 | 0.790933 | 0.972 |
| ACPT      | -0.14 | 0.790934 | 0.972 |
| ACTL7B    | -0.14 | 0.790933 | 0.972 |
| AEN       | -0.14 | 0.790934 | 0.972 |
| AGER      | -0.14 | 0.801198 | 0.973 |
| AGGF1     | -0.14 | 0.801198 | 0.973 |
| ANKFN1    | -0.14 | 0.790934 | 0.972 |
| ARHGEF26  | -0.14 | 0.790934 | 0.972 |
| ARL2BP    | -0.14 | 0.790933 | 0.972 |
| ARL5C     | -0.14 | 0.801199 | 0.973 |
| ARNT      | -0.14 | 0.790933 | 0.972 |
| ASH2L     | -0.14 | 0.801199 | 0.973 |
| AVPR1B    | -0.14 | 0.801199 | 0.973 |

|           |       |          |       |
|-----------|-------|----------|-------|
| BAALC     | -0.14 | 0.790934 | 0.972 |
| BPY2      | -0.14 | 0.790934 | 0.972 |
| BPY2B     | -0.14 | 0.790933 | 0.972 |
| BPY2C     | -0.14 | 0.790933 | 0.972 |
| BRI3BP    | -0.14 | 0.790933 | 0.972 |
| BTBD10    | -0.14 | 0.790933 | 0.972 |
| C15orf56  | -0.14 | 0.790933 | 0.972 |
| C18orf42  | -0.14 | 0.790933 | 0.972 |
| C22orf43  | -0.14 | 0.790934 | 0.972 |
| C4B       | -0.14 | 0.790933 | 0.972 |
| CA12      | -0.14 | 0.790934 | 0.972 |
| CCDC137   | -0.14 | 0.801198 | 0.973 |
| CCDC34    | -0.14 | 0.790933 | 0.972 |
| CD55      | -0.14 | 0.801198 | 0.973 |
| CECR5     | -0.14 | 0.790933 | 0.972 |
| CHMP1A    | -0.14 | 0.801198 | 0.973 |
| CISD2     | -0.14 | 0.790933 | 0.972 |
| CLCNKA    | -0.14 | 0.790933 | 0.972 |
| CNN3      | -0.14 | 0.790934 | 0.972 |
| COL16A1   | -0.14 | 0.790934 | 0.972 |
| CREBRF    | -0.14 | 0.790934 | 0.972 |
| CYP1A1    | -0.14 | 0.790934 | 0.972 |
| DCP1A     | -0.14 | 0.790933 | 0.972 |
| DNAAF3    | -0.14 | 0.790934 | 0.972 |
| DNAH3     | -0.14 | 0.790933 | 0.972 |
| DNAJC1    | -0.14 | 0.790934 | 0.972 |
| DNAJC15   | -0.14 | 0.801198 | 0.973 |
| DOK2      | -0.14 | 0.790933 | 0.972 |
| DPY19L1   | -0.14 | 0.790933 | 0.972 |
| DYNC1LI2  | -0.14 | 0.790934 | 0.972 |
| EEF1E1    | -0.14 | 0.790933 | 0.972 |
| ELAC2     | -0.14 | 0.790933 | 0.972 |
| ENPP4     | -0.14 | 0.801199 | 0.973 |
| EPPIN-WFD | -0.14 | 0.790934 | 0.972 |
| FAM102A   | -0.14 | 0.790934 | 0.972 |
| FAM159B   | -0.14 | 0.790933 | 0.972 |
| FBXO21    | -0.14 | 0.790933 | 0.972 |
| FDX1      | -0.14 | 0.790934 | 0.972 |
| FGFR1OP   | -0.14 | 0.801198 | 0.973 |
| FOXB1     | -0.14 | 0.790934 | 0.972 |
| FRRS1L    | -0.14 | 0.790933 | 0.972 |
| FRY       | -0.14 | 0.790934 | 0.972 |
| GBP5      | -0.14 | 0.790933 | 0.972 |
| GCNT1     | -0.14 | 0.790934 | 0.972 |
| GHRL      | -0.14 | 0.790933 | 0.972 |
| GK5       | -0.14 | 0.801198 | 0.973 |
| GLIPR1L1  | -0.14 | 0.790934 | 0.972 |

|          |       |          |       |
|----------|-------|----------|-------|
| GNMT     | -0.14 | 0.790933 | 0.972 |
| GPR133   | -0.14 | 0.790933 | 0.972 |
| GRAP     | -0.14 | 0.790933 | 0.972 |
| GRB10    | -0.14 | 0.801198 | 0.973 |
| GRB7     | -0.14 | 0.790933 | 0.972 |
| HARBI1   | -0.14 | 0.790933 | 0.972 |
| HSPA12B  | -0.14 | 0.790934 | 0.972 |
| IFNAR1   | -0.14 | 0.790934 | 0.972 |
| IL33     | -0.14 | 0.790934 | 0.972 |
| INHA     | -0.14 | 0.790933 | 0.972 |
| ITGAD    | -0.14 | 0.790934 | 0.972 |
| ITPR3    | -0.14 | 0.790934 | 0.972 |
| KCND2    | -0.14 | 0.790933 | 0.972 |
| KCNU1    | -0.14 | 0.790934 | 0.972 |
| KDM4D    | -0.14 | 0.801198 | 0.973 |
| KLB      | -0.14 | 0.790933 | 0.972 |
| KLRF2    | -0.14 | 0.790933 | 0.972 |
| KRTAP4-7 | -0.14 | 0.801199 | 0.973 |
| LHFPL2   | -0.14 | 0.790933 | 0.972 |
| LIF      | -0.14 | 0.790933 | 0.972 |
| LOXL1    | -0.14 | 0.790934 | 0.972 |
| LRRFIP1  | -0.14 | 0.790933 | 0.972 |
| LZTFL1   | -0.14 | 0.790934 | 0.972 |
| MAP3K15  | -0.14 | 0.790934 | 0.972 |
| MAP3K9   | -0.14 | 0.801198 | 0.973 |
| MBD2     | -0.14 | 0.790933 | 0.972 |
| MEGF8    | -0.14 | 0.790934 | 0.972 |
| MEGF9    | -0.14 | 0.790934 | 0.972 |
| MET      | -0.14 | 0.790933 | 0.972 |
| MMAA     | -0.14 | 0.790933 | 0.972 |
| MS4A3    | -0.14 | 0.790933 | 0.972 |
| MTA2     | -0.14 | 0.790933 | 0.972 |
| MTRNR2L6 | -0.14 | 0.811787 | 0.973 |
| MTRNR2L9 | -0.14 | 0.849243 | 0.978 |
| MYH9     | -0.14 | 0.801199 | 0.973 |
| MYLK2    | -0.14 | 0.801199 | 0.973 |
| MYLK3    | -0.14 | 0.801199 | 0.973 |
| OLFM1    | -0.14 | 0.790933 | 0.972 |
| OR5M1    | -0.14 | 0.790933 | 0.972 |
| OR5M9    | -0.14 | 0.790933 | 0.972 |
| PBXIP1   | -0.14 | 0.811787 | 0.973 |
| PCDHGA10 | -0.14 | 0.790933 | 0.972 |
| PLCB4    | -0.14 | 0.790933 | 0.972 |
| PRKAR2B  | -0.14 | 0.790933 | 0.972 |
| PROX1    | -0.14 | 0.790933 | 0.972 |
| PRSS3    | -0.14 | 0.790934 | 0.972 |
| PYCR2    | -0.14 | 0.790934 | 0.972 |

|          |       |          |       |
|----------|-------|----------|-------|
| RAD9B    | -0.14 | 0.790934 | 0.972 |
| RBMX2    | -0.14 | 0.801198 | 0.973 |
| RCAN1    | -0.14 | 0.790934 | 0.972 |
| REEP2    | -0.14 | 0.790934 | 0.972 |
| RNF169   | -0.14 | 0.790934 | 0.972 |
| ROBO2    | -0.14 | 0.790934 | 0.972 |
| RPL23    | -0.14 | 0.823707 | 0.978 |
| RPS21    | -0.14 | 0.790934 | 0.972 |
| RSPO3    | -0.14 | 0.790934 | 0.972 |
| RXRG     | -0.14 | 0.790933 | 0.972 |
| SEPT9    | -0.14 | 0.790933 | 0.972 |
| SLC5A8   | -0.14 | 0.790933 | 0.972 |
| SLC6A20  | -0.14 | 0.790933 | 0.972 |
| SLC8B1   | -0.14 | 0.790933 | 0.972 |
| SMCP     | -0.14 | 0.801198 | 0.973 |
| SMIM1    | -0.14 | 0.801199 | 0.973 |
| SNED1    | -0.14 | 0.790934 | 0.972 |
| SPANXD   | -0.14 | 0.790934 | 0.972 |
| SPANXN1  | -0.14 | 0.790933 | 0.972 |
| ST6GAL2  | -0.14 | 0.811787 | 0.973 |
| STAMBPL1 | -0.14 | 0.790933 | 0.972 |
| SZRD1    | -0.14 | 0.790934 | 0.972 |
| TCF7     | -0.14 | 0.790934 | 0.972 |
| TERT     | -0.14 | 0.790933 | 0.972 |
| TIMM21   | -0.14 | 0.790934 | 0.972 |
| TKTL2    | -0.14 | 0.790933 | 0.972 |
| TLR2     | -0.14 | 0.790933 | 0.972 |
| TMEM11   | -0.14 | 0.790934 | 0.972 |
| TMEM150B | -0.14 | 0.790933 | 0.972 |
| TMEM160  | -0.14 | 0.790934 | 0.972 |
| TMEM184C | -0.14 | 0.790933 | 0.972 |
| TNF      | -0.14 | 0.790933 | 0.972 |
| TPTE2    | -0.14 | 0.790934 | 0.972 |
| TTC1     | -0.14 | 0.790934 | 0.972 |
| UCMA     | -0.14 | 0.790934 | 0.972 |
| UGP2     | -0.14 | 0.790934 | 0.972 |
| VMO1     | -0.14 | 0.790933 | 0.972 |
| WDR44    | -0.14 | 0.811787 | 0.973 |
| ZMIZ1    | -0.14 | 0.790933 | 0.972 |
| ZNF197   | -0.14 | 0.790933 | 0.972 |
| ZNF786   | -0.14 | 0.790934 | 0.972 |
| ABCA9    | -0.13 | 0.804564 | 0.973 |
| ACAT1    | -0.13 | 0.804564 | 0.973 |
| ACBD7    | -0.13 | 0.814247 | 0.973 |
| AFAP1    | -0.13 | 0.814248 | 0.973 |
| AFAP1L2  | -0.13 | 0.804564 | 0.973 |
| AGR2     | -0.13 | 0.804564 | 0.973 |

|           |       |          |       |
|-----------|-------|----------|-------|
| ALDH5A1   | -0.13 | 0.804564 | 0.973 |
| ANKS3     | -0.13 | 0.804564 | 0.973 |
| APOM      | -0.13 | 0.804564 | 0.973 |
| ARHGAP25  | -0.13 | 0.804564 | 0.973 |
| ARHGEF2   | -0.13 | 0.814248 | 0.973 |
| ARHGEF6   | -0.13 | 0.804564 | 0.973 |
| ARMCX2    | -0.13 | 0.804564 | 0.973 |
| ART5      | -0.13 | 0.814247 | 0.973 |
| ASB3      | -0.13 | 0.804564 | 0.973 |
| ASCC3     | -0.13 | 0.804564 | 0.973 |
| B3GNT4    | -0.13 | 0.804564 | 0.973 |
| C16orf74  | -0.13 | 0.804564 | 0.973 |
| C17orf102 | -0.13 | 0.804564 | 0.973 |
| C1orf172  | -0.13 | 0.804564 | 0.973 |
| C20orf195 | -0.13 | 0.804564 | 0.973 |
| C20orf202 | -0.13 | 0.804564 | 0.973 |
| C20orf85  | -0.13 | 0.804564 | 0.973 |
| C9orf85   | -0.13 | 0.804564 | 0.973 |
| CCDC63    | -0.13 | 0.804564 | 0.973 |
| CDHR5     | -0.13 | 0.804564 | 0.973 |
| CDKL2     | -0.13 | 0.804564 | 0.973 |
| CHIT1     | -0.13 | 0.804564 | 0.973 |
| COL5A3    | -0.13 | 0.814248 | 0.973 |
| CSAD      | -0.13 | 0.804564 | 0.973 |
| CSRP1     | -0.13 | 0.804564 | 0.973 |
| CXCL16    | -0.13 | 0.804564 | 0.973 |
| CYYR1     | -0.13 | 0.804564 | 0.973 |
| DBNDD1    | -0.13 | 0.804564 | 0.973 |
| DHRS7     | -0.13 | 0.804564 | 0.973 |
| DSCAM     | -0.13 | 0.804564 | 0.973 |
| EDARADD   | -0.13 | 0.804564 | 0.973 |
| EFNB1     | -0.13 | 0.804564 | 0.973 |
| EMC10     | -0.13 | 0.814247 | 0.973 |
| FAM188B   | -0.13 | 0.804564 | 0.973 |
| FAM64A    | -0.13 | 0.804564 | 0.973 |
| FAM84B    | -0.13 | 0.804564 | 0.973 |
| FMNL3     | -0.13 | 0.804564 | 0.973 |
| GBA2      | -0.13 | 0.804564 | 0.973 |
| GM2A      | -0.13 | 0.804564 | 0.973 |
| GOLGA3    | -0.13 | 0.804564 | 0.973 |
| GPD1      | -0.13 | 0.804564 | 0.973 |
| GPM6B     | -0.13 | 0.804564 | 0.973 |
| GPR82     | -0.13 | 0.804564 | 0.973 |
| HIST1H2BM | -0.13 | 0.804564 | 0.973 |
| HSPA4     | -0.13 | 0.814248 | 0.973 |
| IFT122    | -0.13 | 0.804564 | 0.973 |
| INPP5D    | -0.13 | 0.804564 | 0.973 |

|          |       |          |       |
|----------|-------|----------|-------|
| JRK      | -0.13 | 0.814247 | 0.973 |
| KDM5D    | -0.13 | 0.804564 | 0.973 |
| KHDC3L   | -0.13 | 0.804564 | 0.973 |
| KLHL17   | -0.13 | 0.814247 | 0.973 |
| KRT33B   | -0.13 | 0.804564 | 0.973 |
| LMOD2    | -0.13 | 0.814247 | 0.973 |
| LRRC2    | -0.13 | 0.804564 | 0.973 |
| MAGED2   | -0.13 | 0.804564 | 0.973 |
| MEIS2    | -0.13 | 0.814247 | 0.973 |
| MRPS2    | -0.13 | 0.804564 | 0.973 |
| MYO7B    | -0.13 | 0.804564 | 0.973 |
| NCKAP1   | -0.13 | 0.804564 | 0.973 |
| NCOA3    | -0.13 | 0.804564 | 0.973 |
| NDUFA4   | -0.13 | 0.814247 | 0.973 |
| NDUFS1   | -0.13 | 0.804564 | 0.973 |
| NOX5     | -0.13 | 0.804564 | 0.973 |
| OGN      | -0.13 | 0.804564 | 0.973 |
| OR11H1   | -0.13 | 0.804564 | 0.973 |
| OR11H12  | -0.13 | 0.804564 | 0.973 |
| OR4F17   | -0.13 | 0.804564 | 0.973 |
| OR4K5    | -0.13 | 0.804564 | 0.973 |
| OSBP     | -0.13 | 0.814247 | 0.973 |
| OSBPL6   | -0.13 | 0.804564 | 0.973 |
| PCBP3    | -0.13 | 0.804564 | 0.973 |
| PDZRN4   | -0.13 | 0.814247 | 0.973 |
| POC1A    | -0.13 | 0.804564 | 0.973 |
| POTEF    | -0.13 | 0.804564 | 0.973 |
| PPM1J    | -0.13 | 0.814247 | 0.973 |
| PPP2R2B  | -0.13 | 0.804564 | 0.973 |
| PSMG3    | -0.13 | 0.814248 | 0.973 |
| PUS7L    | -0.13 | 0.804564 | 0.973 |
| QRFP     | -0.13 | 0.804564 | 0.973 |
| RASSF10  | -0.13 | 0.814247 | 0.973 |
| RETNLB   | -0.13 | 0.804564 | 0.973 |
| RNASE4   | -0.13 | 0.804564 | 0.973 |
| SALL1    | -0.13 | 0.804564 | 0.973 |
| SARDH    | -0.13 | 0.804564 | 0.973 |
| SCN1B    | -0.13 | 0.804564 | 0.973 |
| SELRC1   | -0.13 | 0.804564 | 0.973 |
| SIRT5    | -0.13 | 0.804564 | 0.973 |
| SLC22A23 | -0.13 | 0.804564 | 0.973 |
| SLC41A3  | -0.13 | 0.804564 | 0.973 |
| SPANXN3  | -0.13 | 0.804564 | 0.973 |
| STAM2    | -0.13 | 0.814247 | 0.973 |
| SYCE2    | -0.13 | 0.804564 | 0.973 |
| TAC4     | -0.13 | 0.814247 | 0.973 |
| TANC2    | -0.13 | 0.804564 | 0.973 |

|          |       |          |       |
|----------|-------|----------|-------|
| TCF15    | -0.13 | 0.804564 | 0.973 |
| TGFBR3   | -0.13 | 0.814248 | 0.973 |
| TIMP1    | -0.13 | 0.814247 | 0.973 |
| TMEM236  | -0.13 | 0.804564 | 0.973 |
| TOP3A    | -0.13 | 0.804564 | 0.973 |
| TOX      | -0.13 | 0.804564 | 0.973 |
| UBE3A    | -0.13 | 0.804564 | 0.973 |
| UGT2B28  | -0.13 | 0.814248 | 0.973 |
| UHRF1BP1 | -0.13 | 0.804564 | 0.973 |
| USP44    | -0.13 | 0.814248 | 0.973 |
| VCY      | -0.13 | 0.804564 | 0.973 |
| VCY1B    | -0.13 | 0.804564 | 0.973 |
| VPS54    | -0.13 | 0.804564 | 0.973 |
| VSTM2L   | -0.13 | 0.814248 | 0.973 |
| WDR34    | -0.13 | 0.804564 | 0.973 |
| WFS1     | -0.13 | 0.814248 | 0.973 |
| WNK4     | -0.13 | 0.814247 | 0.973 |
| ZNF354A  | -0.13 | 0.804564 | 0.973 |
| ZNF432   | -0.13 | 0.804564 | 0.973 |
| ZNF813   | -0.13 | 0.804564 | 0.973 |
| ZSCAN23  | -0.13 | 0.804564 | 0.973 |
| ABHD17B  | -0.12 | 0.818285 | 0.973 |
| ABI3BP   | -0.12 | 0.818284 | 0.973 |
| ACAD10   | -0.12 | 0.818284 | 0.973 |
| AKT1S1   | -0.12 | 0.818285 | 0.973 |
| ALDH4A1  | -0.12 | 0.818284 | 0.973 |
| AMPD1    | -0.12 | 0.818284 | 0.973 |
| APOC3    | -0.12 | 0.818284 | 0.973 |
| ARHGEF16 | -0.12 | 0.818285 | 0.973 |
| ARL4D    | -0.12 | 0.82718  | 0.978 |
| BAG2     | -0.12 | 0.818284 | 0.973 |
| BNIP3    | -0.12 | 0.82718  | 0.978 |
| C12orf57 | -0.12 | 0.818284 | 0.973 |
| C4orf29  | -0.12 | 0.818284 | 0.973 |
| C9orf142 | -0.12 | 0.818285 | 0.973 |
| CCL4L2   | -0.12 | 0.818285 | 0.973 |
| CD164    | -0.12 | 0.818284 | 0.973 |
| CD200    | -0.12 | 0.818284 | 0.973 |
| CDS2     | -0.12 | 0.818284 | 0.973 |
| CDX1     | -0.12 | 0.82718  | 0.978 |
| CGRRF1   | -0.12 | 0.818284 | 0.973 |
| CHST10   | -0.12 | 0.818285 | 0.973 |
| CKS1B    | -0.12 | 0.818285 | 0.973 |
| CLDND1   | -0.12 | 0.818285 | 0.973 |
| CLK4     | -0.12 | 0.818284 | 0.973 |
| COA3     | -0.12 | 0.818284 | 0.973 |
| COIL     | -0.12 | 0.818284 | 0.973 |

|           |       |          |       |
|-----------|-------|----------|-------|
| COPS2     | -0.12 | 0.818285 | 0.973 |
| CRB1      | -0.12 | 0.827179 | 0.978 |
| CTDSP2    | -0.12 | 0.827179 | 0.978 |
| DAND5     | -0.12 | 0.827179 | 0.978 |
| DCAF12L1  | -0.12 | 0.818284 | 0.973 |
| DIO1      | -0.12 | 0.818285 | 0.973 |
| DMRTA2    | -0.12 | 0.818284 | 0.973 |
| DPP3      | -0.12 | 0.818284 | 0.973 |
| DPP9-AS1  | -0.12 | 0.82718  | 0.978 |
| DUSP7     | -0.12 | 0.818284 | 0.973 |
| DZIP1L    | -0.12 | 0.818284 | 0.973 |
| EID3      | -0.12 | 0.818285 | 0.973 |
| ELAVL3    | -0.12 | 0.818285 | 0.973 |
| ELFN2     | -0.12 | 0.818285 | 0.973 |
| ENO1      | -0.12 | 0.818285 | 0.973 |
| EXPH5     | -0.12 | 0.818284 | 0.973 |
| FAM71E2   | -0.12 | 0.818284 | 0.973 |
| FANCI     | -0.12 | 0.82718  | 0.978 |
| FANCL     | -0.12 | 0.82718  | 0.978 |
| FASTK     | -0.12 | 0.818285 | 0.973 |
| FRMD5     | -0.12 | 0.836437 | 0.978 |
| FSCN2     | -0.12 | 0.818285 | 0.973 |
| GBP2      | -0.12 | 0.818285 | 0.973 |
| GPANK1    | -0.12 | 0.818284 | 0.973 |
| HIST1H2BO | -0.12 | 0.82718  | 0.978 |
| HMGA1     | -0.12 | 0.818284 | 0.973 |
| HPS1      | -0.12 | 0.82718  | 0.978 |
| ITPK1     | -0.12 | 0.818284 | 0.973 |
| JARID2    | -0.12 | 0.818284 | 0.973 |
| KBTBD6    | -0.12 | 0.818284 | 0.973 |
| KIAA1614  | -0.12 | 0.818285 | 0.973 |
| KREMEN2   | -0.12 | 0.818284 | 0.973 |
| LAG3      | -0.12 | 0.82718  | 0.978 |
| LHB       | -0.12 | 0.818284 | 0.973 |
| LIX1      | -0.12 | 0.818284 | 0.973 |
| LRRC10    | -0.12 | 0.818285 | 0.973 |
| MC4R      | -0.12 | 0.818284 | 0.973 |
| MITF      | -0.12 | 0.818285 | 0.973 |
| MRC2      | -0.12 | 0.818285 | 0.973 |
| MTHFSD    | -0.12 | 0.818284 | 0.973 |
| MUTYH     | -0.12 | 0.818284 | 0.973 |
| NPM1      | -0.12 | 0.836437 | 0.978 |
| NPR2      | -0.12 | 0.818284 | 0.973 |
| NRN1      | -0.12 | 0.818284 | 0.973 |
| OCSTAMP   | -0.12 | 0.818284 | 0.973 |
| OR10J1    | -0.12 | 0.818284 | 0.973 |
| OR13F1    | -0.12 | 0.818285 | 0.973 |

|          |       |          |       |
|----------|-------|----------|-------|
| OR14C36  | -0.12 | 0.818284 | 0.973 |
| OR8H3    | -0.12 | 0.818285 | 0.973 |
| PCGF5    | -0.12 | 0.818284 | 0.973 |
| PDLIM2   | -0.12 | 0.818284 | 0.973 |
| PDZD11   | -0.12 | 0.818285 | 0.973 |
| PLCB3    | -0.12 | 0.818285 | 0.973 |
| PLGRKT   | -0.12 | 0.818285 | 0.973 |
| PLIN4    | -0.12 | 0.818284 | 0.973 |
| PPP1R18  | -0.12 | 0.846815 | 0.978 |
| PRAMEF4  | -0.12 | 0.818285 | 0.973 |
| PRR24    | -0.12 | 0.818284 | 0.973 |
| RBP2     | -0.12 | 0.818284 | 0.973 |
| RNF126   | -0.12 | 0.818285 | 0.973 |
| RPL12    | -0.12 | 0.846815 | 0.978 |
| RPL24    | -0.12 | 0.818284 | 0.973 |
| RPN1     | -0.12 | 0.818285 | 0.973 |
| SEPT15   | -0.12 | 0.818284 | 0.973 |
| SH3GL2   | -0.12 | 0.818284 | 0.973 |
| SLC1A3   | -0.12 | 0.818284 | 0.973 |
| SLC35A2  | -0.12 | 0.818284 | 0.973 |
| SLC45A2  | -0.12 | 0.818285 | 0.973 |
| SPATA32  | -0.12 | 0.818284 | 0.973 |
| SPHKAP   | -0.12 | 0.818284 | 0.973 |
| SRL      | -0.12 | 0.818284 | 0.973 |
| ST8SIA3  | -0.12 | 0.818284 | 0.973 |
| TAF5L    | -0.12 | 0.82718  | 0.978 |
| TARBP2   | -0.12 | 0.818285 | 0.973 |
| TEAD2    | -0.12 | 0.82718  | 0.978 |
| TMEM72   | -0.12 | 0.818285 | 0.973 |
| TP53INP2 | -0.12 | 0.818284 | 0.973 |
| TPRA1    | -0.12 | 0.818284 | 0.973 |
| TRIM52   | -0.12 | 0.82718  | 0.978 |
| TTLL4    | -0.12 | 0.818285 | 0.973 |
| UGGT2    | -0.12 | 0.818284 | 0.973 |
| ZNF10    | -0.12 | 0.818285 | 0.973 |
| ZNF135   | -0.12 | 0.818284 | 0.973 |
| ZNF440   | -0.12 | 0.818284 | 0.973 |
| ZNF470   | -0.12 | 0.818285 | 0.973 |
| ABCA5    | -0.11 | 0.832072 | 0.978 |
| ABCB10   | -0.11 | 0.832073 | 0.978 |
| ACADSB   | -0.11 | 0.832072 | 0.978 |
| AIP      | -0.11 | 0.832073 | 0.978 |
| ALOX12B  | -0.11 | 0.832072 | 0.978 |
| ANO3     | -0.11 | 0.840339 | 0.978 |
| ASB8     | -0.11 | 0.840339 | 0.978 |
| B4GALNT4 | -0.11 | 0.832073 | 0.978 |
| BARX2    | -0.11 | 0.840339 | 0.978 |

|          |       |          |       |
|----------|-------|----------|-------|
| BIK      | -0.11 | 0.832072 | 0.978 |
| BTF3L4   | -0.11 | 0.832073 | 0.978 |
| C6orf226 | -0.11 | 0.832073 | 0.978 |
| CAPN6    | -0.11 | 0.832073 | 0.978 |
| CD6      | -0.11 | 0.832073 | 0.978 |
| CLGN     | -0.11 | 0.832073 | 0.978 |
| CNKSR2   | -0.11 | 0.832073 | 0.978 |
| COQ10B   | -0.11 | 0.832073 | 0.978 |
| CREB3    | -0.11 | 0.832073 | 0.978 |
| CST4     | -0.11 | 0.832073 | 0.978 |
| DOCK11   | -0.11 | 0.840339 | 0.978 |
| EFCAB2   | -0.11 | 0.832073 | 0.978 |
| FAM150A  | -0.11 | 0.840339 | 0.978 |
| FAM159A  | -0.11 | 0.840339 | 0.978 |
| FAM208A  | -0.11 | 0.832072 | 0.978 |
| FOXRED2  | -0.11 | 0.832073 | 0.978 |
| FTH1     | -0.11 | 0.832072 | 0.978 |
| GABRB3   | -0.11 | 0.832072 | 0.978 |
| GBGT1    | -0.11 | 0.832073 | 0.978 |
| GIT2     | -0.11 | 0.832072 | 0.978 |
| GKN1     | -0.11 | 0.832073 | 0.978 |
| GPR124   | -0.11 | 0.832073 | 0.978 |
| GTF2H2C  | -0.11 | 0.832073 | 0.978 |
| IFITM10  | -0.11 | 0.832073 | 0.978 |
| ILVBL    | -0.11 | 0.832073 | 0.978 |
| ITGB1BP1 | -0.11 | 0.832073 | 0.978 |
| ITGB3    | -0.11 | 0.832073 | 0.978 |
| ITGB5    | -0.11 | 0.832072 | 0.978 |
| KLC2     | -0.11 | 0.832073 | 0.978 |
| LRRC32   | -0.11 | 0.832073 | 0.978 |
| MCF2     | -0.11 | 0.832073 | 0.978 |
| MXD3     | -0.11 | 0.840339 | 0.978 |
| MYL5     | -0.11 | 0.832073 | 0.978 |
| MYOM3    | -0.11 | 0.840339 | 0.978 |
| MYSM1    | -0.11 | 0.832073 | 0.978 |
| NAB1     | -0.11 | 0.832073 | 0.978 |
| NCL      | -0.11 | 0.848838 | 0.978 |
| NLRP4    | -0.11 | 0.832072 | 0.978 |
| NPAT     | -0.11 | 0.832073 | 0.978 |
| NRF1     | -0.11 | 0.848838 | 0.978 |
| NSF      | -0.11 | 0.848838 | 0.978 |
| NXF2     | -0.11 | 0.832073 | 0.978 |
| OR10W1   | -0.11 | 0.832073 | 0.978 |
| OR1L8    | -0.11 | 0.840339 | 0.978 |
| OR5B17   | -0.11 | 0.832073 | 0.978 |
| OR5W2    | -0.11 | 0.840339 | 0.978 |
| OTOF     | -0.11 | 0.840339 | 0.978 |

|          |       |          |       |
|----------|-------|----------|-------|
| PAPOLG   | -0.11 | 0.832072 | 0.978 |
| PJA2     | -0.11 | 0.832072 | 0.978 |
| PRDM9    | -0.11 | 0.832073 | 0.978 |
| PRKCDBP  | -0.11 | 0.832073 | 0.978 |
| PRPH     | -0.11 | 0.832073 | 0.978 |
| PSMB2    | -0.11 | 0.848838 | 0.978 |
| PSPH     | -0.11 | 0.832073 | 0.978 |
| PSRC1    | -0.11 | 0.832073 | 0.978 |
| PTGES2   | -0.11 | 0.832073 | 0.978 |
| RASIP1   | -0.11 | 0.858409 | 0.978 |
| RFX2     | -0.11 | 0.832073 | 0.978 |
| RFX6     | -0.11 | 0.840339 | 0.978 |
| RGL2     | -0.11 | 0.832072 | 0.978 |
| RGS2     | -0.11 | 0.832072 | 0.978 |
| RILPL1   | -0.11 | 0.858409 | 0.978 |
| RNASEH2C | -0.11 | 0.832073 | 0.978 |
| SAMD5    | -0.11 | 0.832073 | 0.978 |
| SBK2     | -0.11 | 0.832073 | 0.978 |
| SCML4    | -0.11 | 0.832073 | 0.978 |
| SDE2     | -0.11 | 0.832073 | 0.978 |
| SERPINE2 | -0.11 | 0.832073 | 0.978 |
| SH2B2    | -0.11 | 0.848838 | 0.978 |
| SHQ1     | -0.11 | 0.832072 | 0.978 |
| SLC24A5  | -0.11 | 0.832072 | 0.978 |
| SLC2A4   | -0.11 | 0.840339 | 0.978 |
| SLC35G1  | -0.11 | 0.832073 | 0.978 |
| SPACA5   | -0.11 | 0.832073 | 0.978 |
| SPACA5B  | -0.11 | 0.832073 | 0.978 |
| SPARCL1  | -0.11 | 0.832073 | 0.978 |
| ST3GAL4  | -0.11 | 0.832073 | 0.978 |
| STIM2    | -0.11 | 0.840339 | 0.978 |
| STRADB   | -0.11 | 0.832073 | 0.978 |
| SULT1A1  | -0.11 | 0.832072 | 0.978 |
| TCEA2    | -0.11 | 0.832073 | 0.978 |
| TEP1     | -0.11 | 0.832073 | 0.978 |
| TLCD1    | -0.11 | 0.832073 | 0.978 |
| TP53BP1  | -0.11 | 0.832073 | 0.978 |
| TUBGCP4  | -0.11 | 0.840339 | 0.978 |
| WNT9B    | -0.11 | 0.832073 | 0.978 |
| YTHDF2   | -0.11 | 0.832073 | 0.978 |
| ZNF304   | -0.11 | 0.832073 | 0.978 |
| ZNF649   | -0.11 | 0.832073 | 0.978 |
| ZNF653   | -0.11 | 0.832073 | 0.978 |
| ZNF8     | -0.11 | 0.832072 | 0.978 |
| ZNF852   | -0.11 | 0.848838 | 0.978 |
| ZNHIT6   | -0.11 | 0.840339 | 0.978 |
| AARS2    | -0.1  | 0.845936 | 0.978 |

|          |      |          |       |
|----------|------|----------|-------|
| ACKR2    | -0.1 | 0.845936 | 0.978 |
| ADAMTS13 | -0.1 | 0.845936 | 0.978 |
| AFM      | -0.1 | 0.845936 | 0.978 |
| AGRN     | -0.1 | 0.845936 | 0.978 |
| ANKS6    | -0.1 | 0.845935 | 0.978 |
| APOBEC2  | -0.1 | 0.845936 | 0.978 |
| ARFGEF2  | -0.1 | 0.845936 | 0.978 |
| ARHGAP19 | -0.1 | 0.845936 | 0.978 |
| ATP13A5  | -0.1 | 0.845936 | 0.978 |
| BARX1    | -0.1 | 0.845936 | 0.978 |
| BRINP3   | -0.1 | 0.845936 | 0.978 |
| C19orf67 | -0.1 | 0.845936 | 0.978 |
| C1orf112 | -0.1 | 0.845936 | 0.978 |
| C7orf73  | -0.1 | 0.879073 | 0.984 |
| CCDC23   | -0.1 | 0.86126  | 0.98  |
| CCPG1    | -0.1 | 0.845935 | 0.978 |
| CCR5     | -0.1 | 0.845936 | 0.978 |
| CDKAL1   | -0.1 | 0.845936 | 0.978 |
| CELF3    | -0.1 | 0.845936 | 0.978 |
| CFHR3    | -0.1 | 0.845936 | 0.978 |
| COQ5     | -0.1 | 0.845936 | 0.978 |
| CPA3     | -0.1 | 0.845935 | 0.978 |
| CPSF4L   | -0.1 | 0.845936 | 0.978 |
| CXCL1    | -0.1 | 0.853508 | 0.978 |
| DAPL1    | -0.1 | 0.845936 | 0.978 |
| DMWD     | -0.1 | 0.861261 | 0.98  |
| DZIP1    | -0.1 | 0.845936 | 0.978 |
| EIF2A    | -0.1 | 0.845936 | 0.978 |
| EIF2B1   | -0.1 | 0.845936 | 0.978 |
| EXTL3    | -0.1 | 0.845936 | 0.978 |
| FAM213B  | -0.1 | 0.845936 | 0.978 |
| FAM219B  | -0.1 | 0.845936 | 0.978 |
| FAM35A   | -0.1 | 0.845936 | 0.978 |
| FAM46D   | -0.1 | 0.845936 | 0.978 |
| FBXO46   | -0.1 | 0.845935 | 0.978 |
| FLT3     | -0.1 | 0.845936 | 0.978 |
| GALNT8   | -0.1 | 0.845936 | 0.978 |
| GCLM     | -0.1 | 0.845935 | 0.978 |
| GCNT3    | -0.1 | 0.845936 | 0.978 |
| GLDC     | -0.1 | 0.845936 | 0.978 |
| GLE1     | -0.1 | 0.879073 | 0.984 |
| GPER1    | -0.1 | 0.845936 | 0.978 |
| GPR151   | -0.1 | 0.845936 | 0.978 |
| GUCY1A3  | -0.1 | 0.845936 | 0.978 |
| HEMGN    | -0.1 | 0.845936 | 0.978 |
| HLA-DRB1 | -0.1 | 0.845936 | 0.978 |
| HOMER2   | -0.1 | 0.845936 | 0.978 |

|           |      |          |       |
|-----------|------|----------|-------|
| IDH1      | -0.1 | 0.845936 | 0.978 |
| IFT20     | -0.1 | 0.845936 | 0.978 |
| IFT88     | -0.1 | 0.853509 | 0.978 |
| IL36B     | -0.1 | 0.845936 | 0.978 |
| IL4R      | -0.1 | 0.845936 | 0.978 |
| IQCE      | -0.1 | 0.853508 | 0.978 |
| IRF3      | -0.1 | 0.845936 | 0.978 |
| KCNK9     | -0.1 | 0.845936 | 0.978 |
| KIAA0247  | -0.1 | 0.845936 | 0.978 |
| KIF13B    | -0.1 | 0.845936 | 0.978 |
| KIF20B    | -0.1 | 0.845936 | 0.978 |
| KRTAP10-9 | -0.1 | 0.845936 | 0.978 |
| LRRC56    | -0.1 | 0.845936 | 0.978 |
| LTBP1     | -0.1 | 0.845936 | 0.978 |
| MARVELD2  | -0.1 | 0.845936 | 0.978 |
| MATN3     | -0.1 | 0.853509 | 0.978 |
| MTMR3     | -0.1 | 0.853509 | 0.978 |
| NALCN     | -0.1 | 0.845935 | 0.978 |
| NAV3      | -0.1 | 0.853508 | 0.978 |
| NCAM1     | -0.1 | 0.845936 | 0.978 |
| NCR2      | -0.1 | 0.845936 | 0.978 |
| NDOR1     | -0.1 | 0.845936 | 0.978 |
| NDUFS4    | -0.1 | 0.853508 | 0.978 |
| NKX2-1    | -0.1 | 0.845936 | 0.978 |
| NME4      | -0.1 | 0.845935 | 0.978 |
| NOC2L     | -0.1 | 0.861261 | 0.98  |
| NUDT18    | -0.1 | 0.879074 | 0.984 |
| OGFOD1    | -0.1 | 0.845936 | 0.978 |
| OR1L6     | -0.1 | 0.845935 | 0.978 |
| OR2Z1     | -0.1 | 0.845936 | 0.978 |
| OR6C70    | -0.1 | 0.845936 | 0.978 |
| ORC2      | -0.1 | 0.845936 | 0.978 |
| OXA1L     | -0.1 | 0.853508 | 0.978 |
| PBX4      | -0.1 | 0.845936 | 0.978 |
| PCDHB5    | -0.1 | 0.845936 | 0.978 |
| PCDHB8    | -0.1 | 0.845936 | 0.978 |
| PCDHGA11  | -0.1 | 0.845935 | 0.978 |
| PGPEP1L   | -0.1 | 0.845935 | 0.978 |
| PNMAL1    | -0.1 | 0.853508 | 0.978 |
| POM121C   | -0.1 | 0.853508 | 0.978 |
| POP1      | -0.1 | 0.853509 | 0.978 |
| PPP5D1    | -0.1 | 0.845935 | 0.978 |
| PROB1     | -0.1 | 0.845936 | 0.978 |
| PRSS12    | -0.1 | 0.845935 | 0.978 |
| PRSS57    | -0.1 | 0.845936 | 0.978 |
| PSG2      | -0.1 | 0.845936 | 0.978 |
| PSG6      | -0.1 | 0.845936 | 0.978 |

|          |       |          |       |
|----------|-------|----------|-------|
| PTCH2    | -0.1  | 0.845936 | 0.978 |
| RAB2A    | -0.1  | 0.853508 | 0.978 |
| RASD2    | -0.1  | 0.845936 | 0.978 |
| RGS10    | -0.1  | 0.845936 | 0.978 |
| RIMS2    | -0.1  | 0.845936 | 0.978 |
| RMDN1    | -0.1  | 0.845935 | 0.978 |
| RPN2     | -0.1  | 0.845936 | 0.978 |
| RPS6KA6  | -0.1  | 0.845936 | 0.978 |
| RUFY1    | -0.1  | 0.845936 | 0.978 |
| SCXA     | -0.1  | 0.845936 | 0.978 |
| SCXB     | -0.1  | 0.845936 | 0.978 |
| SELP     | -0.1  | 0.845936 | 0.978 |
| SIVA1    | -0.1  | 0.845936 | 0.978 |
| SLC20A2  | -0.1  | 0.845936 | 0.978 |
| SLC41A2  | -0.1  | 0.845936 | 0.978 |
| SMARCA1  | -0.1  | 0.845936 | 0.978 |
| SMIM15   | -0.1  | 0.845936 | 0.978 |
| SPHK2    | -0.1  | 0.845936 | 0.978 |
| SPOCK1   | -0.1  | 0.845936 | 0.978 |
| SSR2     | -0.1  | 0.845936 | 0.978 |
| SYCN     | -0.1  | 0.845935 | 0.978 |
| TECPR1   | -0.1  | 0.853508 | 0.978 |
| TENM3    | -0.1  | 0.845936 | 0.978 |
| TMEM200C | -0.1  | 0.853508 | 0.978 |
| TP63     | -0.1  | 0.845936 | 0.978 |
| TRDMT1   | -0.1  | 0.845935 | 0.978 |
| TRMT2B   | -0.1  | 0.845935 | 0.978 |
| TUBA3D   | -0.1  | 0.845936 | 0.978 |
| UBE2M    | -0.1  | 0.853509 | 0.978 |
| UHMK1    | -0.1  | 0.845935 | 0.978 |
| UQCRQ    | -0.1  | 0.845936 | 0.978 |
| VPS16    | -0.1  | 0.853508 | 0.978 |
| VTCN1    | -0.1  | 0.853508 | 0.978 |
| WDR66    | -0.1  | 0.870111 | 0.982 |
| ZCRB1    | -0.1  | 0.845936 | 0.978 |
| ZNF501   | -0.1  | 0.853509 | 0.978 |
| ZNF571   | -0.1  | 0.845936 | 0.978 |
| ZNF594   | -0.1  | 0.845936 | 0.978 |
| ZNF645   | -0.1  | 0.845936 | 0.978 |
| ADAP2    | -0.09 | 0.859823 | 0.978 |
| ADH1A    | -0.09 | 0.859823 | 0.978 |
| AKR1D1   | -0.09 | 0.859823 | 0.978 |
| ANKRD45  | -0.09 | 0.859823 | 0.978 |
| ANXA6    | -0.09 | 0.859823 | 0.978 |
| AQP11    | -0.09 | 0.859823 | 0.978 |
| ARHGAP35 | -0.09 | 0.859823 | 0.978 |
| ASTE1    | -0.09 | 0.859823 | 0.978 |

|          |       |          |       |
|----------|-------|----------|-------|
| ATAD3A   | -0.09 | 0.859822 | 0.978 |
| C10orf99 | -0.09 | 0.859823 | 0.978 |
| C1orf100 | -0.09 | 0.859822 | 0.978 |
| CCNT2    | -0.09 | 0.859822 | 0.978 |
| CDK7     | -0.09 | 0.866689 | 0.982 |
| CEP55    | -0.09 | 0.873708 | 0.982 |
| CHD8     | -0.09 | 0.859823 | 0.978 |
| CHRNA2   | -0.09 | 0.866688 | 0.982 |
| CLLU1OS  | -0.09 | 0.859822 | 0.978 |
| COL24A1  | -0.09 | 0.859823 | 0.978 |
| CSMD3    | -0.09 | 0.866689 | 0.982 |
| CYP1A2   | -0.09 | 0.859823 | 0.978 |
| DCLRE1B  | -0.09 | 0.859822 | 0.978 |
| DDHD1    | -0.09 | 0.859822 | 0.978 |
| DUSP11   | -0.09 | 0.873708 | 0.982 |
| DUSP15   | -0.09 | 0.859822 | 0.978 |
| DYNLL2   | -0.09 | 0.859822 | 0.978 |
| EDAR     | -0.09 | 0.859823 | 0.978 |
| ETNK2    | -0.09 | 0.866689 | 0.982 |
| F9       | -0.09 | 0.859822 | 0.978 |
| FADS6    | -0.09 | 0.859822 | 0.978 |
| FAM227B  | -0.09 | 0.859823 | 0.978 |
| FAM83H   | -0.09 | 0.859822 | 0.978 |
| FAT2     | -0.09 | 0.859822 | 0.978 |
| FCER2    | -0.09 | 0.859822 | 0.978 |
| FGD6     | -0.09 | 0.859822 | 0.978 |
| FKBP9    | -0.09 | 0.859823 | 0.978 |
| FNBP4    | -0.09 | 0.866688 | 0.982 |
| FXYP4    | -0.09 | 0.859822 | 0.978 |
| GALNT11  | -0.09 | 0.859822 | 0.978 |
| GAMT     | -0.09 | 0.859822 | 0.978 |
| GGH      | -0.09 | 0.859822 | 0.978 |
| GPR137B  | -0.09 | 0.859823 | 0.978 |
| GSTM3    | -0.09 | 0.873708 | 0.982 |
| GUCY1B3  | -0.09 | 0.859823 | 0.978 |
| HEY1     | -0.09 | 0.866688 | 0.982 |
| HOXA1    | -0.09 | 0.859823 | 0.978 |
| IDNK     | -0.09 | 0.859823 | 0.978 |
| IL17RA   | -0.09 | 0.859823 | 0.978 |
| IQCG     | -0.09 | 0.859822 | 0.978 |
| KBTBD8   | -0.09 | 0.859822 | 0.978 |
| KCNK6    | -0.09 | 0.859823 | 0.978 |
| KHK      | -0.09 | 0.866689 | 0.982 |
| KIAA1210 | -0.09 | 0.859822 | 0.978 |
| KIF22    | -0.09 | 0.859822 | 0.978 |
| KLK14    | -0.09 | 0.859823 | 0.978 |
| LCE1F    | -0.09 | 0.866689 | 0.982 |

|            |       |          |       |
|------------|-------|----------|-------|
| LGALS7     | -0.09 | 0.859822 | 0.978 |
| LRRC49     | -0.09 | 0.859822 | 0.978 |
| LUC7L2     | -0.09 | 0.859822 | 0.978 |
| MAB21L3    | -0.09 | 0.859822 | 0.978 |
| MCHR1      | -0.09 | 0.859822 | 0.978 |
| MCPH1      | -0.09 | 0.859823 | 0.978 |
| MGME1      | -0.09 | 0.859822 | 0.978 |
| MRPL38     | -0.09 | 0.866688 | 0.982 |
| MRPS22     | -0.09 | 0.859822 | 0.978 |
| NFE2L2     | -0.09 | 0.859822 | 0.978 |
| NKD2       | -0.09 | 0.859822 | 0.978 |
| NPPA       | -0.09 | 0.859822 | 0.978 |
| NUP153     | -0.09 | 0.859823 | 0.978 |
| OR10H1     | -0.09 | 0.859823 | 0.978 |
| OR3A3      | -0.09 | 0.859823 | 0.978 |
| OR9A4      | -0.09 | 0.866688 | 0.982 |
| PCDHA9     | -0.09 | 0.859823 | 0.978 |
| PIN4       | -0.09 | 0.859822 | 0.978 |
| PIP        | -0.09 | 0.859822 | 0.978 |
| PLXNA3     | -0.09 | 0.859822 | 0.978 |
| POC1B      | -0.09 | 0.859823 | 0.978 |
| PIIP5K1    | -0.09 | 0.859822 | 0.978 |
| PUM2       | -0.09 | 0.859823 | 0.978 |
| PUSL1      | -0.09 | 0.866689 | 0.982 |
| RAB26      | -0.09 | 0.866688 | 0.982 |
| RAD51AP2   | -0.09 | 0.866688 | 0.982 |
| RARRES1    | -0.09 | 0.859822 | 0.978 |
| RGS9       | -0.09 | 0.866688 | 0.982 |
| RNF103-CHI | -0.09 | 0.859822 | 0.978 |
| RPEL1      | -0.09 | 0.859823 | 0.978 |
| RPS15A     | -0.09 | 0.899237 | 0.984 |
| SCTR       | -0.09 | 0.859822 | 0.978 |
| SEPT8      | -0.09 | 0.859822 | 0.978 |
| SERTAD2    | -0.09 | 0.859823 | 0.978 |
| SEZ6       | -0.09 | 0.859822 | 0.978 |
| SHF        | -0.09 | 0.859823 | 0.978 |
| SIGLEC10   | -0.09 | 0.859823 | 0.978 |
| SKA2       | -0.09 | 0.859822 | 0.978 |
| SLC15A3    | -0.09 | 0.859823 | 0.978 |
| SLC2A4RG   | -0.09 | 0.859823 | 0.978 |
| SLC37A4    | -0.09 | 0.881922 | 0.984 |
| SLC48A1    | -0.09 | 0.859822 | 0.978 |
| SLITRK5    | -0.09 | 0.866688 | 0.982 |
| SMCR8      | -0.09 | 0.859823 | 0.978 |
| SORBS3     | -0.09 | 0.859823 | 0.978 |
| SRSF6      | -0.09 | 0.859822 | 0.978 |
| SYN1       | -0.09 | 0.859822 | 0.978 |

|           |       |          |       |
|-----------|-------|----------|-------|
| SYTL1     | -0.09 | 0.859823 | 0.978 |
| TEPP      | -0.09 | 0.859822 | 0.978 |
| TMED6     | -0.09 | 0.859822 | 0.978 |
| TMEM183A  | -0.09 | 0.859822 | 0.978 |
| TMEM71    | -0.09 | 0.859822 | 0.978 |
| TMPRSS15  | -0.09 | 0.859822 | 0.978 |
| TNFAIP8L3 | -0.09 | 0.859822 | 0.978 |
| TNK1      | -0.09 | 0.859823 | 0.978 |
| TOM1      | -0.09 | 0.866689 | 0.982 |
| TRAM2     | -0.09 | 0.866688 | 0.982 |
| TREX1     | -0.09 | 0.859822 | 0.978 |
| TRMT5     | -0.09 | 0.866688 | 0.982 |
| TYRO3     | -0.09 | 0.859822 | 0.978 |
| USP36     | -0.09 | 0.866689 | 0.982 |
| VWF       | -0.09 | 0.859823 | 0.978 |
| WDR93     | -0.09 | 0.859822 | 0.978 |
| WFIKN1    | -0.09 | 0.859823 | 0.978 |
| WT1       | -0.09 | 0.859823 | 0.978 |
| YPEL3     | -0.09 | 0.859823 | 0.978 |
| ZNF143    | -0.09 | 0.859823 | 0.978 |
| ZNF345    | -0.09 | 0.859822 | 0.978 |
| ZNF454    | -0.09 | 0.859822 | 0.978 |
| ZNF611    | -0.09 | 0.859822 | 0.978 |
| ZNF775    | -0.09 | 0.859822 | 0.978 |
| ZNF891    | -0.09 | 0.859823 | 0.978 |
| ZPLD1     | -0.09 | 0.859822 | 0.978 |
| ADAM10    | -0.08 | 0.873739 | 0.982 |
| ADAM22    | -0.08 | 0.879984 | 0.984 |
| ALX1      | -0.08 | 0.873738 | 0.982 |
| ALX4      | -0.08 | 0.873738 | 0.982 |
| AMT       | -0.08 | 0.873738 | 0.982 |
| ASIC3     | -0.08 | 0.873738 | 0.982 |
| BMS1      | -0.08 | 0.879983 | 0.984 |
| C11orf48  | -0.08 | 0.873739 | 0.982 |
| C18orf54  | -0.08 | 0.873738 | 0.982 |
| C19orf77  | -0.08 | 0.873738 | 0.982 |
| C1orf27   | -0.08 | 0.873739 | 0.982 |
| CBLC      | -0.08 | 0.873738 | 0.982 |
| CCDC167   | -0.08 | 0.873738 | 0.982 |
| CDH2      | -0.08 | 0.873738 | 0.982 |
| CINP      | -0.08 | 0.879983 | 0.984 |
| CNDP1     | -0.08 | 0.873738 | 0.982 |
| COL6A2    | -0.08 | 0.879983 | 0.984 |
| CORO7-PAM | -0.08 | 0.873738 | 0.982 |
| COX6A2    | -0.08 | 0.873739 | 0.982 |
| DNAJC12   | -0.08 | 0.873739 | 0.982 |
| DUSP28    | -0.08 | 0.873738 | 0.982 |

|          |       |          |       |
|----------|-------|----------|-------|
| DYX1C1   | -0.08 | 0.873738 | 0.982 |
| EXOC2    | -0.08 | 0.873738 | 0.982 |
| FAM129B  | -0.08 | 0.879983 | 0.984 |
| FAM163B  | -0.08 | 0.893656 | 0.984 |
| FDX1L    | -0.08 | 0.879984 | 0.984 |
| FGF1     | -0.08 | 0.873738 | 0.982 |
| GATA6    | -0.08 | 0.873738 | 0.982 |
| GIMAP6   | -0.08 | 0.879983 | 0.984 |
| GRM6     | -0.08 | 0.879983 | 0.984 |
| GRM7     | -0.08 | 0.873739 | 0.982 |
| GUCD1    | -0.08 | 0.873738 | 0.982 |
| HECW2    | -0.08 | 0.873739 | 0.982 |
| HLA-DOA  | -0.08 | 0.873738 | 0.982 |
| HMP19    | -0.08 | 0.879983 | 0.984 |
| HSDL2    | -0.08 | 0.873738 | 0.982 |
| HSPA6    | -0.08 | 0.873739 | 0.982 |
| IDUA     | -0.08 | 0.873738 | 0.982 |
| IFT27    | -0.08 | 0.873738 | 0.982 |
| IGFBPL1  | -0.08 | 0.873738 | 0.982 |
| ING2     | -0.08 | 0.873738 | 0.982 |
| KCNAB1   | -0.08 | 0.873738 | 0.982 |
| KIF1C    | -0.08 | 0.873738 | 0.982 |
| KIF7     | -0.08 | 0.873739 | 0.982 |
| KLHDC10  | -0.08 | 0.873738 | 0.982 |
| KPNA1    | -0.08 | 0.873738 | 0.982 |
| KRT15    | -0.08 | 0.873739 | 0.982 |
| KRT78    | -0.08 | 0.879983 | 0.984 |
| LDLRAD3  | -0.08 | 0.879983 | 0.984 |
| LIN28B   | -0.08 | 0.873738 | 0.982 |
| LPCAT2   | -0.08 | 0.873738 | 0.982 |
| LRP3     | -0.08 | 0.873738 | 0.982 |
| MAPK3    | -0.08 | 0.879983 | 0.984 |
| MEOX2    | -0.08 | 0.873738 | 0.982 |
| MMP8     | -0.08 | 0.873738 | 0.982 |
| MPST     | -0.08 | 0.873738 | 0.982 |
| MRPS18A  | -0.08 | 0.873739 | 0.982 |
| NAA16    | -0.08 | 0.873739 | 0.982 |
| NAT2     | -0.08 | 0.873738 | 0.982 |
| NUP62CL  | -0.08 | 0.873738 | 0.982 |
| OPN1MW2  | -0.08 | 0.873738 | 0.982 |
| OR52E8   | -0.08 | 0.873738 | 0.982 |
| PKD1L3   | -0.08 | 0.873738 | 0.982 |
| POTEH    | -0.08 | 0.873739 | 0.982 |
| PPP4C    | -0.08 | 0.873738 | 0.982 |
| PRAMEF27 | -0.08 | 0.873738 | 0.982 |
| PRSS8    | -0.08 | 0.879984 | 0.984 |
| RBX1     | -0.08 | 0.886246 | 0.984 |

|          |       |          |       |
|----------|-------|----------|-------|
| RHOXF2B  | -0.08 | 0.873738 | 0.982 |
| RNASE11  | -0.08 | 0.873738 | 0.982 |
| RXFP3    | -0.08 | 0.873738 | 0.982 |
| SAA4     | -0.08 | 0.873738 | 0.982 |
| SAMD12   | -0.08 | 0.873739 | 0.982 |
| SAMD15   | -0.08 | 0.873739 | 0.982 |
| SBF2     | -0.08 | 0.873738 | 0.982 |
| SCN10A   | -0.08 | 0.873738 | 0.982 |
| SCUBE3   | -0.08 | 0.873738 | 0.982 |
| SEPT1    | -0.08 | 0.879983 | 0.984 |
| SLC2A10  | -0.08 | 0.879983 | 0.984 |
| SLC2A9   | -0.08 | 0.873738 | 0.982 |
| SMAGP    | -0.08 | 0.873738 | 0.982 |
| SOX5     | -0.08 | 0.873738 | 0.982 |
| SPATA33  | -0.08 | 0.879983 | 0.984 |
| SRGAP2   | -0.08 | 0.873739 | 0.982 |
| SYNGR2   | -0.08 | 0.873738 | 0.982 |
| TMEM14B  | -0.08 | 0.873738 | 0.982 |
| TRIM43   | -0.08 | 0.873738 | 0.982 |
| TRIM64B  | -0.08 | 0.873738 | 0.982 |
| TROAP    | -0.08 | 0.873739 | 0.982 |
| TSSK1B   | -0.08 | 0.873738 | 0.982 |
| UQCR11   | -0.08 | 0.873738 | 0.982 |
| USP42    | -0.08 | 0.873739 | 0.982 |
| VIPAS39  | -0.08 | 0.873738 | 0.982 |
| WNT4     | -0.08 | 0.873738 | 0.982 |
| XIRP2    | -0.08 | 0.873738 | 0.982 |
| ABTB1    | -0.07 | 0.887673 | 0.984 |
| ACTBL2   | -0.07 | 0.887673 | 0.984 |
| ACTRT2   | -0.07 | 0.887674 | 0.984 |
| ADAM32   | -0.07 | 0.887673 | 0.984 |
| AKIRIN2  | -0.07 | 0.887673 | 0.984 |
| APLNR    | -0.07 | 0.887674 | 0.984 |
| ARHGAP28 | -0.07 | 0.887674 | 0.984 |
| ARL6IP4  | -0.07 | 0.89322  | 0.984 |
| ASB12    | -0.07 | 0.887673 | 0.984 |
| ASPSCR1  | -0.07 | 0.887674 | 0.984 |
| ATP8B3   | -0.07 | 0.887673 | 0.984 |
| BNC1     | -0.07 | 0.887673 | 0.984 |
| C2orf27B | -0.07 | 0.898739 | 0.984 |
| C8B      | -0.07 | 0.887673 | 0.984 |
| CASC3    | -0.07 | 0.887673 | 0.984 |
| CCDC89   | -0.07 | 0.887673 | 0.984 |
| CDC42BPB | -0.07 | 0.887673 | 0.984 |
| CDH10    | -0.07 | 0.887673 | 0.984 |
| CDK17    | -0.07 | 0.887673 | 0.984 |
| CHST2    | -0.07 | 0.887673 | 0.984 |

|         |       |          |       |
|---------|-------|----------|-------|
| CRK     | -0.07 | 0.887673 | 0.984 |
| CRTAC1  | -0.07 | 0.887674 | 0.984 |
| CSN3    | -0.07 | 0.887673 | 0.984 |
| CYP1B1  | -0.07 | 0.887673 | 0.984 |
| CYSLTR2 | -0.07 | 0.887673 | 0.984 |
| DECR1   | -0.07 | 0.887673 | 0.984 |
| DEFA4   | -0.07 | 0.887674 | 0.984 |
| DENND2A | -0.07 | 0.898739 | 0.984 |
| DHTKD1  | -0.07 | 0.89322  | 0.984 |
| DNA2    | -0.07 | 0.905461 | 0.984 |
| DNAJB8  | -0.07 | 0.887673 | 0.984 |
| DNAJC17 | -0.07 | 0.887673 | 0.984 |
| EML3    | -0.07 | 0.887673 | 0.984 |
| EPHX4   | -0.07 | 0.887673 | 0.984 |
| EVA1B   | -0.07 | 0.887673 | 0.984 |
| FAM135B | -0.07 | 0.887674 | 0.984 |
| FAR2    | -0.07 | 0.887674 | 0.984 |
| FOXC2   | -0.07 | 0.887673 | 0.984 |
| GAPDH   | -0.07 | 0.893221 | 0.984 |
| GLB1L2  | -0.07 | 0.887673 | 0.984 |
| GNPNAT1 | -0.07 | 0.887673 | 0.984 |
| GSG1    | -0.07 | 0.887673 | 0.984 |
| HDDC2   | -0.07 | 0.887673 | 0.984 |
| HERC5   | -0.07 | 0.887673 | 0.984 |
| HIPK1   | -0.07 | 0.89322  | 0.984 |
| HOXB4   | -0.07 | 0.887673 | 0.984 |
| HSPE1   | -0.07 | 0.919267 | 0.984 |
| IFNE    | -0.07 | 0.887673 | 0.984 |
| IRAK4   | -0.07 | 0.887674 | 0.984 |
| KIR2DL1 | -0.07 | 0.887673 | 0.984 |
| LONRF1  | -0.07 | 0.887673 | 0.984 |
| LRRC25  | -0.07 | 0.887673 | 0.984 |
| MAGEC3  | -0.07 | 0.893221 | 0.984 |
| MAK     | -0.07 | 0.887673 | 0.984 |
| MARCH3  | -0.07 | 0.887673 | 0.984 |
| MTMR11  | -0.07 | 0.887673 | 0.984 |
| NCF1    | -0.07 | 0.887673 | 0.984 |
| NEUROD1 | -0.07 | 0.887673 | 0.984 |
| NGFR    | -0.07 | 0.887673 | 0.984 |
| OR2T6   | -0.07 | 0.887673 | 0.984 |
| OR5AP2  | -0.07 | 0.887673 | 0.984 |
| OR5AU1  | -0.07 | 0.887674 | 0.984 |
| PALM3   | -0.07 | 0.887673 | 0.984 |
| PCDHGA4 | -0.07 | 0.89322  | 0.984 |
| PCSK4   | -0.07 | 0.893221 | 0.984 |
| PLEKHN1 | -0.07 | 0.89322  | 0.984 |
| PTX3    | -0.07 | 0.887673 | 0.984 |

|          |       |          |       |
|----------|-------|----------|-------|
| RAD51    | -0.07 | 0.90546  | 0.984 |
| RNF168   | -0.07 | 0.887673 | 0.984 |
| RNF219   | -0.07 | 0.887674 | 0.984 |
| RTKN2    | -0.07 | 0.887673 | 0.984 |
| SCUBE1   | -0.07 | 0.898738 | 0.984 |
| SHISA7   | -0.07 | 0.89322  | 0.984 |
| SLC15A2  | -0.07 | 0.887674 | 0.984 |
| SLC30A2  | -0.07 | 0.887673 | 0.984 |
| SLC37A2  | -0.07 | 0.887673 | 0.984 |
| SMYD2    | -0.07 | 0.887673 | 0.984 |
| SNX24    | -0.07 | 0.887673 | 0.984 |
| STARD8   | -0.07 | 0.887673 | 0.984 |
| STEAP1B  | -0.07 | 0.887674 | 0.984 |
| TAS2R42  | -0.07 | 0.887673 | 0.984 |
| TEN1     | -0.07 | 0.887674 | 0.984 |
| TFCP2L1  | -0.07 | 0.887674 | 0.984 |
| TIFA     | -0.07 | 0.887674 | 0.984 |
| TMEM37   | -0.07 | 0.89322  | 0.984 |
| TOMM5    | -0.07 | 0.887673 | 0.984 |
| TRMT112  | -0.07 | 0.898739 | 0.984 |
| TRMT2A   | -0.07 | 0.89322  | 0.984 |
| TSEN34   | -0.07 | 0.887674 | 0.984 |
| TSNAX    | -0.07 | 0.887673 | 0.984 |
| USP31    | -0.07 | 0.887673 | 0.984 |
| VAMP8    | -0.07 | 0.887674 | 0.984 |
| ZFP57    | -0.07 | 0.887674 | 0.984 |
| ZNF737   | -0.07 | 0.89322  | 0.984 |
| ZSCAN32  | -0.07 | 0.887673 | 0.984 |
| ABCC2    | -0.06 | 0.906521 | 0.984 |
| ADAM7    | -0.06 | 0.90162  | 0.984 |
| ADAM8    | -0.06 | 0.90162  | 0.984 |
| ADAMTS19 | -0.06 | 0.90162  | 0.984 |
| ALDOC    | -0.06 | 0.90162  | 0.984 |
| ALKBH1   | -0.06 | 0.90162  | 0.984 |
| ANGPTL2  | -0.06 | 0.90162  | 0.984 |
| APITD1   | -0.06 | 0.90162  | 0.984 |
| AREL1    | -0.06 | 0.90162  | 0.984 |
| ARMS2    | -0.06 | 0.90162  | 0.984 |
| ATP5O    | -0.06 | 0.90162  | 0.984 |
| ATXN1    | -0.06 | 0.911343 | 0.984 |
| B4GALT3  | -0.06 | 0.90162  | 0.984 |
| BAG4     | -0.06 | 0.906521 | 0.984 |
| BRF1     | -0.06 | 0.90162  | 0.984 |
| C11orf44 | -0.06 | 0.906521 | 0.984 |
| C19orf66 | -0.06 | 0.90162  | 0.984 |
| C1orf226 | -0.06 | 0.90162  | 0.984 |
| C1QTNF7  | -0.06 | 0.906521 | 0.984 |

|           |       |          |       |
|-----------|-------|----------|-------|
| CACUL1    | -0.06 | 0.90162  | 0.984 |
| CASP8AP2  | -0.06 | 0.917186 | 0.984 |
| CCDC103   | -0.06 | 0.90162  | 0.984 |
| CCDC166   | -0.06 | 0.90162  | 0.984 |
| CCDC171   | -0.06 | 0.906521 | 0.984 |
| CCDC28A   | -0.06 | 0.90162  | 0.984 |
| CEBPA     | -0.06 | 0.90162  | 0.984 |
| CENPA     | -0.06 | 0.90652  | 0.984 |
| CHCHD10   | -0.06 | 0.90162  | 0.984 |
| CLDN2     | -0.06 | 0.90162  | 0.984 |
| CLP1      | -0.06 | 0.911343 | 0.984 |
| CNEP1R1   | -0.06 | 0.90162  | 0.984 |
| CRIM1     | -0.06 | 0.90162  | 0.984 |
| CSTA      | -0.06 | 0.90162  | 0.984 |
| CXCL9     | -0.06 | 0.90162  | 0.984 |
| CXCR1     | -0.06 | 0.90162  | 0.984 |
| CXorf61   | -0.06 | 0.90162  | 0.984 |
| DAPP1     | -0.06 | 0.90162  | 0.984 |
| DHODH     | -0.06 | 0.90652  | 0.984 |
| DHRS1     | -0.06 | 0.90162  | 0.984 |
| EIF2AK3   | -0.06 | 0.90162  | 0.984 |
| EPS8L1    | -0.06 | 0.90162  | 0.984 |
| FAM43A    | -0.06 | 0.90162  | 0.984 |
| FAM83A    | -0.06 | 0.90162  | 0.984 |
| FKBP10    | -0.06 | 0.906521 | 0.984 |
| FLT1      | -0.06 | 0.90652  | 0.984 |
| FOXQ1     | -0.06 | 0.90162  | 0.984 |
| GP1BA     | -0.06 | 0.90162  | 0.984 |
| GPBP1L1   | -0.06 | 0.90162  | 0.984 |
| GUCY2F    | -0.06 | 0.90162  | 0.984 |
| H2BFM     | -0.06 | 0.90162  | 0.984 |
| HEPH      | -0.06 | 0.90162  | 0.984 |
| HIST1H1A  | -0.06 | 0.906521 | 0.984 |
| HKR1      | -0.06 | 0.906521 | 0.984 |
| HMGA2     | -0.06 | 0.90162  | 0.984 |
| HNRNPH2   | -0.06 | 0.90162  | 0.984 |
| IHH       | -0.06 | 0.90162  | 0.984 |
| INHBC     | -0.06 | 0.90162  | 0.984 |
| KCNH6     | -0.06 | 0.90162  | 0.984 |
| KCTD1     | -0.06 | 0.90162  | 0.984 |
| KHNYN     | -0.06 | 0.90162  | 0.984 |
| KRTAP24-1 | -0.06 | 0.90162  | 0.984 |
| LCA5      | -0.06 | 0.90162  | 0.984 |
| LOC441155 | -0.06 | 0.90162  | 0.984 |
| LRRTM4    | -0.06 | 0.90162  | 0.984 |
| LY9       | -0.06 | 0.90162  | 0.984 |
| LYN       | -0.06 | 0.90162  | 0.984 |

|            |       |          |       |
|------------|-------|----------|-------|
| MAML2      | -0.06 | 0.90162  | 0.984 |
| MAP1A      | -0.06 | 0.906521 | 0.984 |
| MCEE       | -0.06 | 0.906521 | 0.984 |
| METTL7A    | -0.06 | 0.90162  | 0.984 |
| MON1B      | -0.06 | 0.90652  | 0.984 |
| MYL6       | -0.06 | 0.90162  | 0.984 |
| NSFL1C     | -0.06 | 0.90162  | 0.984 |
| ODF4       | -0.06 | 0.90162  | 0.984 |
| OIT3       | -0.06 | 0.90162  | 0.984 |
| OLIG3      | -0.06 | 0.90162  | 0.984 |
| PANX2      | -0.06 | 0.90162  | 0.984 |
| PCDHA13    | -0.06 | 0.90162  | 0.984 |
| PDGFRA     | -0.06 | 0.90162  | 0.984 |
| PEBP1      | -0.06 | 0.90162  | 0.984 |
| POLR2B     | -0.06 | 0.911343 | 0.984 |
| PPP1R15A   | -0.06 | 0.90652  | 0.984 |
| PRDX2      | -0.06 | 0.90162  | 0.984 |
| PTF1A      | -0.06 | 0.90162  | 0.984 |
| PTHLH      | -0.06 | 0.90162  | 0.984 |
| RFPL3      | -0.06 | 0.90162  | 0.984 |
| RNF103     | -0.06 | 0.90162  | 0.984 |
| RNF148     | -0.06 | 0.90162  | 0.984 |
| RSPH10B2   | -0.06 | 0.90162  | 0.984 |
| SEC11A     | -0.06 | 0.90162  | 0.984 |
| SEC24D     | -0.06 | 0.90162  | 0.984 |
| SEC61B     | -0.06 | 0.90162  | 0.984 |
| SESN2      | -0.06 | 0.90162  | 0.984 |
| SFR1       | -0.06 | 0.90162  | 0.984 |
| SLC16A13   | -0.06 | 0.90162  | 0.984 |
| SLC25A16   | -0.06 | 0.90162  | 0.984 |
| SLC25A23   | -0.06 | 0.90162  | 0.984 |
| SLC5A10    | -0.06 | 0.90162  | 0.984 |
| SLC6A18    | -0.06 | 0.90162  | 0.984 |
| SNCG       | -0.06 | 0.90162  | 0.984 |
| SOS1       | -0.06 | 0.90162  | 0.984 |
| STAT6      | -0.06 | 0.90162  | 0.984 |
| SYNJ2BP    | -0.06 | 0.90652  | 0.984 |
| TATDN1     | -0.06 | 0.90162  | 0.984 |
| THBD       | -0.06 | 0.90162  | 0.984 |
| TMC3       | -0.06 | 0.90162  | 0.984 |
| TMPRSS12   | -0.06 | 0.90162  | 0.984 |
| TNFSF12-TN | -0.06 | 0.90162  | 0.984 |
| TPR        | -0.06 | 0.90162  | 0.984 |
| TREML4     | -0.06 | 0.90162  | 0.984 |
| TRIM55     | -0.06 | 0.90162  | 0.984 |
| UPF3A      | -0.06 | 0.90162  | 0.984 |
| WBP1L      | -0.06 | 0.90162  | 0.984 |

|          |       |          |       |
|----------|-------|----------|-------|
| WWC2     | -0.06 | 0.90162  | 0.984 |
| XKR5     | -0.06 | 0.90652  | 0.984 |
| ZBTB24   | -0.06 | 0.90162  | 0.984 |
| ZMYM6NB  | -0.06 | 0.90162  | 0.984 |
| ZNF184   | -0.06 | 0.90162  | 0.984 |
| ZNF480   | -0.06 | 0.90162  | 0.984 |
| ZNF568   | -0.06 | 0.90162  | 0.984 |
| ZNF623   | -0.06 | 0.90162  | 0.984 |
| ZNF70    | -0.06 | 0.90162  | 0.984 |
| ZNF799   | -0.06 | 0.90162  | 0.984 |
| ZNF827   | -0.06 | 0.906521 | 0.984 |
| ABCA4    | -0.05 | 0.91565  | 0.984 |
| ACTL9    | -0.05 | 0.919868 | 0.984 |
| ALKBH6   | -0.05 | 0.91565  | 0.984 |
| AP3B1    | -0.05 | 0.91565  | 0.984 |
| ARID5B   | -0.05 | 0.91565  | 0.984 |
| AS3MT    | -0.05 | 0.91565  | 0.984 |
| ATOH7    | -0.05 | 0.91565  | 0.984 |
| ATP6AP2  | -0.05 | 0.919868 | 0.984 |
| B9D2     | -0.05 | 0.91565  | 0.984 |
| C11orf42 | -0.05 | 0.91565  | 0.984 |
| C11orf70 | -0.05 | 0.91565  | 0.984 |
| C12orf43 | -0.05 | 0.91565  | 0.984 |
| C1orf123 | -0.05 | 0.91565  | 0.984 |
| C2orf66  | -0.05 | 0.91565  | 0.984 |
| C3orf67  | -0.05 | 0.91565  | 0.984 |
| CALD1    | -0.05 | 0.923893 | 0.984 |
| CAMP     | -0.05 | 0.91565  | 0.984 |
| CCDC24   | -0.05 | 0.919868 | 0.984 |
| CCDC66   | -0.05 | 0.91565  | 0.984 |
| CCL3     | -0.05 | 0.91565  | 0.984 |
| CDX2     | -0.05 | 0.919867 | 0.984 |
| CHD1     | -0.05 | 0.91565  | 0.984 |
| CHIC1    | -0.05 | 0.919868 | 0.984 |
| CKM      | -0.05 | 0.91565  | 0.984 |
| COL15A1  | -0.05 | 0.91565  | 0.984 |
| CR2      | -0.05 | 0.91565  | 0.984 |
| CTH      | -0.05 | 0.919867 | 0.984 |
| CTRB2    | -0.05 | 0.91565  | 0.984 |
| CTSW     | -0.05 | 0.919867 | 0.984 |
| CWC27    | -0.05 | 0.91565  | 0.984 |
| CYP4F2   | -0.05 | 0.91565  | 0.984 |
| DLEU7    | -0.05 | 0.91565  | 0.984 |
| EDNRB    | -0.05 | 0.91565  | 0.984 |
| EPM2AIP1 | -0.05 | 0.91565  | 0.984 |
| FAM196B  | -0.05 | 0.91565  | 0.984 |
| FANCB    | -0.05 | 0.91565  | 0.984 |

|          |       |          |       |
|----------|-------|----------|-------|
| FANCE    | -0.05 | 0.91565  | 0.984 |
| FANK1    | -0.05 | 0.91565  | 0.984 |
| FFAR1    | -0.05 | 0.919868 | 0.984 |
| FOLR1    | -0.05 | 0.91565  | 0.984 |
| FUT9     | -0.05 | 0.91565  | 0.984 |
| GABRR3   | -0.05 | 0.91565  | 0.984 |
| GGACT    | -0.05 | 0.91565  | 0.984 |
| GPR146   | -0.05 | 0.91565  | 0.984 |
| GSTM1    | -0.05 | 0.919868 | 0.984 |
| GZMM     | -0.05 | 0.919867 | 0.984 |
| IGHMBP2  | -0.05 | 0.91565  | 0.984 |
| IL1RN    | -0.05 | 0.91565  | 0.984 |
| IVL      | -0.05 | 0.919868 | 0.984 |
| KANSL1L  | -0.05 | 0.91565  | 0.984 |
| KCNIP4   | -0.05 | 0.919868 | 0.984 |
| KIAA0391 | -0.05 | 0.923893 | 0.984 |
| KIAA1522 | -0.05 | 0.919868 | 0.984 |
| KLK8     | -0.05 | 0.91565  | 0.984 |
| LCE1C    | -0.05 | 0.91565  | 0.984 |
| LEPROT   | -0.05 | 0.91565  | 0.984 |
| LGALS9B  | -0.05 | 0.91565  | 0.984 |
| LILRB5   | -0.05 | 0.919867 | 0.984 |
| MAGOHB   | -0.05 | 0.923893 | 0.984 |
| MIB2     | -0.05 | 0.91565  | 0.984 |
| MKRN1    | -0.05 | 0.91565  | 0.984 |
| MMD2     | -0.05 | 0.91565  | 0.984 |
| MOV10    | -0.05 | 0.919868 | 0.984 |
| MRPL33   | -0.05 | 0.923893 | 0.984 |
| MT1F     | -0.05 | 0.91565  | 0.984 |
| NACC2    | -0.05 | 0.91565  | 0.984 |
| NBEAL2   | -0.05 | 0.91565  | 0.984 |
| NEDD9    | -0.05 | 0.91565  | 0.984 |
| NID2     | -0.05 | 0.91565  | 0.984 |
| NKX1-2   | -0.05 | 0.91565  | 0.984 |
| NRTN     | -0.05 | 0.91565  | 0.984 |
| NTF3     | -0.05 | 0.91565  | 0.984 |
| NUTF2    | -0.05 | 0.929051 | 0.984 |
| NXF2B    | -0.05 | 0.91565  | 0.984 |
| NXF5     | -0.05 | 0.91565  | 0.984 |
| NXPH4    | -0.05 | 0.919867 | 0.984 |
| OAZ1     | -0.05 | 0.91565  | 0.984 |
| OR7C2    | -0.05 | 0.91565  | 0.984 |
| OR9G1    | -0.05 | 0.91565  | 0.984 |
| P4HA3    | -0.05 | 0.91565  | 0.984 |
| PABPC4   | -0.05 | 0.91565  | 0.984 |
| PAK1     | -0.05 | 0.919868 | 0.984 |
| PDE3A    | -0.05 | 0.91565  | 0.984 |

|           |       |          |       |
|-----------|-------|----------|-------|
| PLA2G2E   | -0.05 | 0.91565  | 0.984 |
| PLOD1     | -0.05 | 0.919867 | 0.984 |
| PLVAP     | -0.05 | 0.91565  | 0.984 |
| POTEE     | -0.05 | 0.929051 | 0.984 |
| PPAN-P2RY | -0.05 | 0.91565  | 0.984 |
| PRSS21    | -0.05 | 0.91565  | 0.984 |
| RBM26     | -0.05 | 0.919867 | 0.984 |
| RBM33     | -0.05 | 0.91565  | 0.984 |
| RDM1      | -0.05 | 0.91565  | 0.984 |
| RHBDF2    | -0.05 | 0.91565  | 0.984 |
| RNASE8    | -0.05 | 0.91565  | 0.984 |
| RNF24     | -0.05 | 0.91565  | 0.984 |
| RNPC3     | -0.05 | 0.91565  | 0.984 |
| SENP2     | -0.05 | 0.91565  | 0.984 |
| SEPT4     | -0.05 | 0.91565  | 0.984 |
| SF3A2     | -0.05 | 0.91565  | 0.984 |
| SHROOM1   | -0.05 | 0.91565  | 0.984 |
| SLC25A44  | -0.05 | 0.91565  | 0.984 |
| SLC39A8   | -0.05 | 0.91565  | 0.984 |
| SLC6A11   | -0.05 | 0.91565  | 0.984 |
| SPACA6    | -0.05 | 0.91565  | 0.984 |
| STX12     | -0.05 | 0.91565  | 0.984 |
| TBC1D13   | -0.05 | 0.91565  | 0.984 |
| THAP5     | -0.05 | 0.91565  | 0.984 |
| TMSB4Y    | -0.05 | 0.923893 | 0.984 |
| TP73      | -0.05 | 0.91565  | 0.984 |
| TRAK2     | -0.05 | 0.919867 | 0.984 |
| TRAPPC10  | -0.05 | 0.91565  | 0.984 |
| TRIM8     | -0.05 | 0.91565  | 0.984 |
| TSTA3     | -0.05 | 0.91565  | 0.984 |
| UBAC2     | -0.05 | 0.919867 | 0.984 |
| UNC13D    | -0.05 | 0.91565  | 0.984 |
| WDR1      | -0.05 | 0.91565  | 0.984 |
| ZC3H8     | -0.05 | 0.91565  | 0.984 |
| ZNF211    | -0.05 | 0.91565  | 0.984 |
| ZNF254    | -0.05 | 0.91565  | 0.984 |
| ZNF516    | -0.05 | 0.91565  | 0.984 |
| ZNF773    | -0.05 | 0.919868 | 0.984 |
| ZNF776    | -0.05 | 0.91565  | 0.984 |
| ZWILCH    | -0.05 | 0.91565  | 0.984 |
| ACP6      | -0.04 | 0.929593 | 0.984 |
| ARMC9     | -0.04 | 0.933251 | 0.984 |
| ASB14     | -0.04 | 0.929592 | 0.984 |
| B4GALNT2  | -0.04 | 0.929593 | 0.984 |
| BHMT2     | -0.04 | 0.933251 | 0.984 |
| BRD3      | -0.04 | 0.929593 | 0.984 |
| C14orf132 | -0.04 | 0.929593 | 0.984 |

|          |       |          |       |
|----------|-------|----------|-------|
| C2orf53  | -0.04 | 0.929593 | 0.984 |
| C8orf31  | -0.04 | 0.929592 | 0.984 |
| C9orf50  | -0.04 | 0.929593 | 0.984 |
| CADM3    | -0.04 | 0.929593 | 0.984 |
| CCL4     | -0.04 | 0.929593 | 0.984 |
| CD163    | -0.04 | 0.929593 | 0.984 |
| CD247    | -0.04 | 0.933251 | 0.984 |
| CD8A     | -0.04 | 0.93325  | 0.984 |
| CDKL5    | -0.04 | 0.929593 | 0.984 |
| CHST14   | -0.04 | 0.929593 | 0.984 |
| CHST5    | -0.04 | 0.929593 | 0.984 |
| CHURC1   | -0.04 | 0.933251 | 0.984 |
| CLCF1    | -0.04 | 0.929593 | 0.984 |
| CLDN6    | -0.04 | 0.929592 | 0.984 |
| CLN3     | -0.04 | 0.929592 | 0.984 |
| CNTN2    | -0.04 | 0.929593 | 0.984 |
| CRELD1   | -0.04 | 0.940821 | 0.984 |
| CSAG1    | -0.04 | 0.93325  | 0.984 |
| DBNDD2   | -0.04 | 0.933251 | 0.984 |
| DCLK1    | -0.04 | 0.929592 | 0.984 |
| DHX16    | -0.04 | 0.93325  | 0.984 |
| DIO2     | -0.04 | 0.929592 | 0.984 |
| DNAJB6   | -0.04 | 0.929593 | 0.984 |
| DNHD1    | -0.04 | 0.93325  | 0.984 |
| DZIP3    | -0.04 | 0.929593 | 0.984 |
| EIF2B2   | -0.04 | 0.929593 | 0.984 |
| ENPP7    | -0.04 | 0.929593 | 0.984 |
| FAM153B  | -0.04 | 0.929592 | 0.984 |
| FAM216B  | -0.04 | 0.929593 | 0.984 |
| FAM73B   | -0.04 | 0.933251 | 0.984 |
| FOXK2    | -0.04 | 0.933251 | 0.984 |
| FUT3     | -0.04 | 0.929592 | 0.984 |
| FZD9     | -0.04 | 0.933251 | 0.984 |
| GABRB1   | -0.04 | 0.929592 | 0.984 |
| GHRH     | -0.04 | 0.929593 | 0.984 |
| GPR75    | -0.04 | 0.929593 | 0.984 |
| HEPACAM  | -0.04 | 0.929592 | 0.984 |
| HLA-DQA1 | -0.04 | 0.929593 | 0.984 |
| HYKK     | -0.04 | 0.929593 | 0.984 |
| IQCA1L   | -0.04 | 0.93325  | 0.984 |
| IQCB1    | -0.04 | 0.929592 | 0.984 |
| KCNH3    | -0.04 | 0.929592 | 0.984 |
| KCNK3    | -0.04 | 0.929593 | 0.984 |
| KRT27    | -0.04 | 0.929592 | 0.984 |
| KRTAP5-6 | -0.04 | 0.933251 | 0.984 |
| LAT      | -0.04 | 0.933251 | 0.984 |
| LGALS12  | -0.04 | 0.929593 | 0.984 |

|           |       |          |       |
|-----------|-------|----------|-------|
| LGALS4    | -0.04 | 0.929593 | 0.984 |
| LHX3      | -0.04 | 0.929593 | 0.984 |
| LSM14A    | -0.04 | 0.929592 | 0.984 |
| MAP4K2    | -0.04 | 0.929592 | 0.984 |
| MBD3L2    | -0.04 | 0.929592 | 0.984 |
| MKI67     | -0.04 | 0.93325  | 0.984 |
| MORC2     | -0.04 | 0.929593 | 0.984 |
| MRAP2     | -0.04 | 0.929592 | 0.984 |
| MYOC      | -0.04 | 0.93325  | 0.984 |
| NDN       | -0.04 | 0.929593 | 0.984 |
| NFATC4    | -0.04 | 0.929593 | 0.984 |
| NR3C2     | -0.04 | 0.933251 | 0.984 |
| OR2L2     | -0.04 | 0.929593 | 0.984 |
| OR4B1     | -0.04 | 0.929593 | 0.984 |
| OR9G9     | -0.04 | 0.929592 | 0.984 |
| OTOR      | -0.04 | 0.929593 | 0.984 |
| P2RX5     | -0.04 | 0.929593 | 0.984 |
| PABPN1L   | -0.04 | 0.93325  | 0.984 |
| PAQR7     | -0.04 | 0.929593 | 0.984 |
| PCP2      | -0.04 | 0.933251 | 0.984 |
| PDCD6     | -0.04 | 0.929593 | 0.984 |
| PELI2     | -0.04 | 0.929593 | 0.984 |
| PNP       | -0.04 | 0.929593 | 0.984 |
| POLRMT    | -0.04 | 0.929593 | 0.984 |
| PPAN      | -0.04 | 0.929592 | 0.984 |
| PPIAL4C   | -0.04 | 0.929593 | 0.984 |
| PRKCD     | -0.04 | 0.929592 | 0.984 |
| PRSS50    | -0.04 | 0.929593 | 0.984 |
| PSAP      | -0.04 | 0.93325  | 0.984 |
| PSMC1     | -0.04 | 0.929592 | 0.984 |
| PTCHD1    | -0.04 | 0.929593 | 0.984 |
| PURB      | -0.04 | 0.929592 | 0.984 |
| RAB5A     | -0.04 | 0.929592 | 0.984 |
| RASSF5    | -0.04 | 0.93325  | 0.984 |
| RASSF8    | -0.04 | 0.929593 | 0.984 |
| RDH13     | -0.04 | 0.929593 | 0.984 |
| RHBDL3    | -0.04 | 0.929592 | 0.984 |
| RHOG      | -0.04 | 0.929593 | 0.984 |
| RPGRIP1   | -0.04 | 0.929592 | 0.984 |
| RS1       | -0.04 | 0.929592 | 0.984 |
| RSPH9     | -0.04 | 0.929593 | 0.984 |
| SCAMP3    | -0.04 | 0.929593 | 0.984 |
| SERPINB12 | -0.04 | 0.929593 | 0.984 |
| SERPINH1  | -0.04 | 0.929592 | 0.984 |
| SLC38A7   | -0.04 | 0.93325  | 0.984 |
| SLC39A2   | -0.04 | 0.929592 | 0.984 |
| SLX4IP    | -0.04 | 0.929593 | 0.984 |

|          |       |          |       |
|----------|-------|----------|-------|
| SMARCD2  | -0.04 | 0.929593 | 0.984 |
| SMARCD3  | -0.04 | 0.933251 | 0.984 |
| SNX19    | -0.04 | 0.929593 | 0.984 |
| SPAG11A  | -0.04 | 0.929592 | 0.984 |
| SRGAP2C  | -0.04 | 0.944907 | 0.984 |
| SSTR2    | -0.04 | 0.929593 | 0.984 |
| SSX1     | -0.04 | 0.929592 | 0.984 |
| ST8SIA6  | -0.04 | 0.929593 | 0.984 |
| STK36    | -0.04 | 0.93325  | 0.984 |
| TBC1D3G  | -0.04 | 0.929593 | 0.984 |
| TBCB     | -0.04 | 0.93325  | 0.984 |
| TEX30    | -0.04 | 0.929592 | 0.984 |
| TEX35    | -0.04 | 0.929593 | 0.984 |
| THAP9    | -0.04 | 0.933251 | 0.984 |
| TKT      | -0.04 | 0.929593 | 0.984 |
| TMEM121  | -0.04 | 0.929593 | 0.984 |
| TMEM25   | -0.04 | 0.93325  | 0.984 |
| TMEM8A   | -0.04 | 0.93655  | 0.984 |
| TNFSF15  | -0.04 | 0.929592 | 0.984 |
| TOM1L2   | -0.04 | 0.933251 | 0.984 |
| TOMM40L  | -0.04 | 0.929593 | 0.984 |
| TRAIP    | -0.04 | 0.94082  | 0.984 |
| TRPM5    | -0.04 | 0.929593 | 0.984 |
| TVP23C   | -0.04 | 0.929593 | 0.984 |
| VSTM2B   | -0.04 | 0.929593 | 0.984 |
| WDR16    | -0.04 | 0.929593 | 0.984 |
| ZBBX     | -0.04 | 0.929592 | 0.984 |
| ZNF282   | -0.04 | 0.933251 | 0.984 |
| ZNF35    | -0.04 | 0.929592 | 0.984 |
| ZNF529   | -0.04 | 0.929593 | 0.984 |
| ZNF627   | -0.04 | 0.929593 | 0.984 |
| ZNF711   | -0.04 | 0.933251 | 0.984 |
| ZYG11A   | -0.04 | 0.933251 | 0.984 |
| ACER2    | -0.03 | 0.9436   | 0.984 |
| ACSM1    | -0.03 | 0.9436   | 0.984 |
| ACTL8    | -0.03 | 0.9436   | 0.984 |
| AKAP13   | -0.03 | 0.9436   | 0.984 |
| AKTIP    | -0.03 | 0.9436   | 0.984 |
| ALDH3B2  | -0.03 | 0.9436   | 0.984 |
| ANKK1    | -0.03 | 0.9436   | 0.984 |
| ARHGAP30 | -0.03 | 0.9436   | 0.984 |
| ATG14    | -0.03 | 0.9436   | 0.984 |
| BATF2    | -0.03 | 0.9436   | 0.984 |
| C14orf28 | -0.03 | 0.9436   | 0.984 |
| C1S      | -0.03 | 0.9436   | 0.984 |
| C5orf52  | -0.03 | 0.9436   | 0.984 |
| CALCR    | -0.03 | 0.9436   | 0.984 |

|           |       |          |       |
|-----------|-------|----------|-------|
| CAPZA2    | -0.03 | 0.9436   | 0.984 |
| CCDC39    | -0.03 | 0.9436   | 0.984 |
| CCDC81    | -0.03 | 0.9436   | 0.984 |
| CFD       | -0.03 | 0.9436   | 0.984 |
| CLEC2B    | -0.03 | 0.9436   | 0.984 |
| CRYBB1    | -0.03 | 0.9436   | 0.984 |
| CRYL1     | -0.03 | 0.9436   | 0.984 |
| CSNK1D    | -0.03 | 0.9436   | 0.984 |
| CTSS      | -0.03 | 0.9436   | 0.984 |
| CYBRD1    | -0.03 | 0.9436   | 0.984 |
| CYP26A1   | -0.03 | 0.9436   | 0.984 |
| DBT       | -0.03 | 0.9436   | 0.984 |
| DENND4C   | -0.03 | 0.9436   | 0.984 |
| DGCR6     | -0.03 | 0.9436   | 0.984 |
| DTHD1     | -0.03 | 0.9436   | 0.984 |
| EDN1      | -0.03 | 0.9436   | 0.984 |
| EHHADH    | -0.03 | 0.9436   | 0.984 |
| EXOSC1    | -0.03 | 0.9436   | 0.984 |
| F2        | -0.03 | 0.94663  | 0.984 |
| FABP3     | -0.03 | 0.9436   | 0.984 |
| FADS1     | -0.03 | 0.9436   | 0.984 |
| FAM178B   | -0.03 | 0.9436   | 0.984 |
| FAM188A   | -0.03 | 0.9436   | 0.984 |
| FAM20C    | -0.03 | 0.9436   | 0.984 |
| FAM229B   | -0.03 | 0.9436   | 0.984 |
| FGGY      | -0.03 | 0.9436   | 0.984 |
| FIGN      | -0.03 | 0.9436   | 0.984 |
| FKBP3     | -0.03 | 0.946631 | 0.984 |
| FRG2C     | -0.03 | 0.9436   | 0.984 |
| GFOD1     | -0.03 | 0.9436   | 0.984 |
| HIST2H2BE | -0.03 | 0.9436   | 0.984 |
| HMX2      | -0.03 | 0.9436   | 0.984 |
| HRH2      | -0.03 | 0.9436   | 0.984 |
| IL20RB    | -0.03 | 0.9436   | 0.984 |
| IL36RN    | -0.03 | 0.9436   | 0.984 |
| IQCK      | -0.03 | 0.9436   | 0.984 |
| ISCA1     | -0.03 | 0.94663  | 0.984 |
| KCNQ3     | -0.03 | 0.9436   | 0.984 |
| KLF17     | -0.03 | 0.9436   | 0.984 |
| KLHL2     | -0.03 | 0.9436   | 0.984 |
| KLK1      | -0.03 | 0.9436   | 0.984 |
| KREMEN1   | -0.03 | 0.9436   | 0.984 |
| LLPH      | -0.03 | 0.949174 | 0.984 |
| LRRC26    | -0.03 | 0.946631 | 0.984 |
| LRRN3     | -0.03 | 0.9436   | 0.984 |
| LSM2      | -0.03 | 0.94663  | 0.984 |
| LY6G5C    | -0.03 | 0.94663  | 0.984 |

|          |       |          |       |
|----------|-------|----------|-------|
| MARVELD3 | -0.03 | 0.94663  | 0.984 |
| MAT2A    | -0.03 | 0.955927 | 0.984 |
| MICB     | -0.03 | 0.9436   | 0.984 |
| MINOS1   | -0.03 | 0.9436   | 0.984 |
| MMP28    | -0.03 | 0.946631 | 0.984 |
| MTRNR2L7 | -0.03 | 0.949174 | 0.984 |
| NME8     | -0.03 | 0.9436   | 0.984 |
| OR13C2   | -0.03 | 0.94663  | 0.984 |
| OR2AE1   | -0.03 | 0.9436   | 0.984 |
| OR8S1    | -0.03 | 0.949173 | 0.984 |
| OR9A2    | -0.03 | 0.9436   | 0.984 |
| OVOL3    | -0.03 | 0.9436   | 0.984 |
| P2RY11   | -0.03 | 0.9436   | 0.984 |
| P3H3     | -0.03 | 0.9436   | 0.984 |
| P4HA1    | -0.03 | 0.9436   | 0.984 |
| PADI4    | -0.03 | 0.9436   | 0.984 |
| PAEP     | -0.03 | 0.9436   | 0.984 |
| PAPPA2   | -0.03 | 0.9436   | 0.984 |
| PARP15   | -0.03 | 0.9436   | 0.984 |
| PCSK6    | -0.03 | 0.9436   | 0.984 |
| PDCD2L   | -0.03 | 0.9436   | 0.984 |
| PHYH     | -0.03 | 0.9436   | 0.984 |
| PIGV     | -0.03 | 0.9436   | 0.984 |
| PKDREJ   | -0.03 | 0.9436   | 0.984 |
| PLSCR1   | -0.03 | 0.9436   | 0.984 |
| PML      | -0.03 | 0.9436   | 0.984 |
| PNO1     | -0.03 | 0.95267  | 0.984 |
| PPARGC1B | -0.03 | 0.94663  | 0.984 |
| PPIAL4A  | -0.03 | 0.9436   | 0.984 |
| PPP2R5D  | -0.03 | 0.9436   | 0.984 |
| PTCHD4   | -0.03 | 0.9436   | 0.984 |
| PTK6     | -0.03 | 0.9436   | 0.984 |
| RANBP3L  | -0.03 | 0.9436   | 0.984 |
| RBMS3    | -0.03 | 0.9436   | 0.984 |
| RCN2     | -0.03 | 0.9436   | 0.984 |
| RFC2     | -0.03 | 0.946631 | 0.984 |
| RNF149   | -0.03 | 0.9436   | 0.984 |
| RNF41    | -0.03 | 0.9436   | 0.984 |
| RNF43    | -0.03 | 0.9436   | 0.984 |
| RNF44    | -0.03 | 0.946631 | 0.984 |
| RPLP1    | -0.03 | 0.9436   | 0.984 |
| RPS11    | -0.03 | 0.95267  | 0.984 |
| RUNDC3B  | -0.03 | 0.9436   | 0.984 |
| RUVBL1   | -0.03 | 0.955927 | 0.984 |
| SAMD8    | -0.03 | 0.9436   | 0.984 |
| SEMA6A   | -0.03 | 0.9436   | 0.984 |
| SERINC5  | -0.03 | 0.9436   | 0.984 |

|          |       |          |       |
|----------|-------|----------|-------|
| SERPINI2 | -0.03 | 0.9436   | 0.984 |
| SH3BP4   | -0.03 | 0.9436   | 0.984 |
| SIRT4    | -0.03 | 0.9436   | 0.984 |
| SLC24A4  | -0.03 | 0.9436   | 0.984 |
| SLC2A8   | -0.03 | 0.9436   | 0.984 |
| SLC6A12  | -0.03 | 0.946631 | 0.984 |
| SNRNP35  | -0.03 | 0.9436   | 0.984 |
| SPDYE5   | -0.03 | 0.946631 | 0.984 |
| SPRR2D   | -0.03 | 0.9436   | 0.984 |
| SRGAP2B  | -0.03 | 0.946631 | 0.984 |
| STAB2    | -0.03 | 0.9436   | 0.984 |
| STK31    | -0.03 | 0.9436   | 0.984 |
| TBC1D8B  | -0.03 | 0.94663  | 0.984 |
| TBCC     | -0.03 | 0.949174 | 0.984 |
| TCEANC   | -0.03 | 0.9436   | 0.984 |
| TEX14    | -0.03 | 0.9436   | 0.984 |
| TGOLN2   | -0.03 | 0.9436   | 0.984 |
| TMEM105  | -0.03 | 0.94663  | 0.984 |
| TOX2     | -0.03 | 0.9436   | 0.984 |
| TRIM49D1 | -0.03 | 0.9436   | 0.984 |
| TRIM49D2 | -0.03 | 0.9436   | 0.984 |
| TTC22    | -0.03 | 0.9436   | 0.984 |
| TTC9B    | -0.03 | 0.9436   | 0.984 |
| UNC80    | -0.03 | 0.9436   | 0.984 |
| VIPR2    | -0.03 | 0.9436   | 0.984 |
| WBSCR28  | -0.03 | 0.9436   | 0.984 |
| WNT10A   | -0.03 | 0.9436   | 0.984 |
| XAGE1A   | -0.03 | 0.94663  | 0.984 |
| XAGE1C   | -0.03 | 0.94663  | 0.984 |
| XAGE1D   | -0.03 | 0.94663  | 0.984 |
| XXYL1    | -0.03 | 0.94663  | 0.984 |
| ZC3H12B  | -0.03 | 0.9436   | 0.984 |
| ZNF142   | -0.03 | 0.9436   | 0.984 |
| ZNF195   | -0.03 | 0.9436   | 0.984 |
| ZNF385B  | -0.03 | 0.9436   | 0.984 |
| ZNF579   | -0.03 | 0.946631 | 0.984 |
| ZNF7     | -0.03 | 0.94663  | 0.984 |
| ZNF780A  | -0.03 | 0.9436   | 0.984 |
| ZNF805   | -0.03 | 0.9436   | 0.984 |
| ZSCAN5A  | -0.03 | 0.9436   | 0.984 |
| ABCG5    | -0.02 | 0.959907 | 0.985 |
| ALLC     | -0.02 | 0.957708 | 0.984 |
| ANGEL1   | -0.02 | 0.957708 | 0.984 |
| ANKS1B   | -0.02 | 0.957708 | 0.984 |
| ARHGEF1  | -0.02 | 0.957708 | 0.984 |
| ATP5E    | -0.02 | 0.961783 | 0.986 |
| AXDND1   | -0.02 | 0.957708 | 0.984 |

|          |       |          |       |
|----------|-------|----------|-------|
| BCDIN3D  | -0.02 | 0.957708 | 0.984 |
| C11orf49 | -0.02 | 0.957708 | 0.984 |
| C11orf96 | -0.02 | 0.969814 | 0.986 |
| C12orf77 | -0.02 | 0.957708 | 0.984 |
| C19orf44 | -0.02 | 0.957708 | 0.984 |
| C1orf106 | -0.02 | 0.961782 | 0.986 |
| C2CD4C   | -0.02 | 0.957708 | 0.984 |
| C6orf1   | -0.02 | 0.957708 | 0.984 |
| C6orf25  | -0.02 | 0.957708 | 0.984 |
| CA8      | -0.02 | 0.959906 | 0.985 |
| CALCB    | -0.02 | 0.957708 | 0.984 |
| CBX5     | -0.02 | 0.957708 | 0.984 |
| CCDC85C  | -0.02 | 0.957708 | 0.984 |
| CCNE1    | -0.02 | 0.957708 | 0.984 |
| CDC42EP3 | -0.02 | 0.957708 | 0.984 |
| CEP170   | -0.02 | 0.957708 | 0.984 |
| CES4A    | -0.02 | 0.957708 | 0.984 |
| CHCHD5   | -0.02 | 0.957708 | 0.984 |
| CLSTN2   | -0.02 | 0.957708 | 0.984 |
| COPS8    | -0.02 | 0.957708 | 0.984 |
| CUTA     | -0.02 | 0.957708 | 0.984 |
| CYP24A1  | -0.02 | 0.957708 | 0.984 |
| DAZL     | -0.02 | 0.957708 | 0.984 |
| DBF4B    | -0.02 | 0.957708 | 0.984 |
| DCBLD1   | -0.02 | 0.957708 | 0.984 |
| DERL3    | -0.02 | 0.957708 | 0.984 |
| DNAJB12  | -0.02 | 0.957708 | 0.984 |
| DOK5     | -0.02 | 0.959906 | 0.985 |
| ECHDC3   | -0.02 | 0.959906 | 0.985 |
| EDA2R    | -0.02 | 0.957708 | 0.984 |
| EEF1D    | -0.02 | 0.957708 | 0.984 |
| EMCN     | -0.02 | 0.957708 | 0.984 |
| F2RL1    | -0.02 | 0.957708 | 0.984 |
| F2RL2    | -0.02 | 0.957708 | 0.984 |
| FAM162B  | -0.02 | 0.957708 | 0.984 |
| FGF17    | -0.02 | 0.957708 | 0.984 |
| FHL1     | -0.02 | 0.957708 | 0.984 |
| FXN      | -0.02 | 0.957708 | 0.984 |
| G2E3     | -0.02 | 0.957708 | 0.984 |
| GABRG3   | -0.02 | 0.957708 | 0.984 |
| GCLC     | -0.02 | 0.957708 | 0.984 |
| GDNF     | -0.02 | 0.957708 | 0.984 |
| GPAT2    | -0.02 | 0.957708 | 0.984 |
| GPATCH11 | -0.02 | 0.957708 | 0.984 |
| HNF4A    | -0.02 | 0.957708 | 0.984 |
| HOOK3    | -0.02 | 0.957708 | 0.984 |
| IL17RE   | -0.02 | 0.959907 | 0.985 |

|           |       |          |       |
|-----------|-------|----------|-------|
| IL1RAPL1  | -0.02 | 0.957708 | 0.984 |
| IL37      | -0.02 | 0.957708 | 0.984 |
| INTU      | -0.02 | 0.957708 | 0.984 |
| IPO5      | -0.02 | 0.957708 | 0.984 |
| JUN       | -0.02 | 0.957708 | 0.984 |
| KIAA1107  | -0.02 | 0.957708 | 0.984 |
| KRT33A    | -0.02 | 0.957708 | 0.984 |
| KRT6C     | -0.02 | 0.957708 | 0.984 |
| KRTAP19-7 | -0.02 | 0.957708 | 0.984 |
| KRTAP20-3 | -0.02 | 0.957708 | 0.984 |
| LEPRE1    | -0.02 | 0.957708 | 0.984 |
| LILRB2    | -0.02 | 0.959907 | 0.985 |
| LMX1B     | -0.02 | 0.959907 | 0.985 |
| LOC403312 | -0.02 | 0.959907 | 0.985 |
| MAB21L2   | -0.02 | 0.957708 | 0.984 |
| MAP2K6    | -0.02 | 0.959906 | 0.985 |
| MAP3K7CL  | -0.02 | 0.957708 | 0.984 |
| MASP2     | -0.02 | 0.957708 | 0.984 |
| MBD3L4    | -0.02 | 0.957708 | 0.984 |
| MCHR2     | -0.02 | 0.957708 | 0.984 |
| MED18     | -0.02 | 0.957708 | 0.984 |
| MFSD2B    | -0.02 | 0.957708 | 0.984 |
| MLC1      | -0.02 | 0.957708 | 0.984 |
| MLXIPL    | -0.02 | 0.957708 | 0.984 |
| MOBP      | -0.02 | 0.957708 | 0.984 |
| MRPL52    | -0.02 | 0.957708 | 0.984 |
| MYD88     | -0.02 | 0.959907 | 0.985 |
| MYO1D     | -0.02 | 0.957708 | 0.984 |
| NEU4      | -0.02 | 0.957708 | 0.984 |
| NFKBIZ    | -0.02 | 0.957708 | 0.984 |
| NPB       | -0.02 | 0.957708 | 0.984 |
| NPEPL1    | -0.02 | 0.957708 | 0.984 |
| NRG1      | -0.02 | 0.957708 | 0.984 |
| OSBPL9    | -0.02 | 0.957708 | 0.984 |
| PCDHGC4   | -0.02 | 0.957708 | 0.984 |
| PCYT1B    | -0.02 | 0.957708 | 0.984 |
| PDCD7     | -0.02 | 0.957708 | 0.984 |
| PDE6C     | -0.02 | 0.957708 | 0.984 |
| PGK2      | -0.02 | 0.957708 | 0.984 |
| PLEK      | -0.02 | 0.957708 | 0.984 |
| POU2F1    | -0.02 | 0.961783 | 0.986 |
| PRKAG3    | -0.02 | 0.957708 | 0.984 |
| PROCA1    | -0.02 | 0.957708 | 0.984 |
| PROSER1   | -0.02 | 0.959907 | 0.985 |
| RNASE2    | -0.02 | 0.957708 | 0.984 |
| RNF14     | -0.02 | 0.957708 | 0.984 |
| RPAP2     | -0.02 | 0.957708 | 0.984 |

|           |       |          |       |
|-----------|-------|----------|-------|
| RPLP0     | -0.02 | 0.957708 | 0.984 |
| SAMSN1    | -0.02 | 0.957708 | 0.984 |
| SCRN2     | -0.02 | 0.957708 | 0.984 |
| SH3GL3    | -0.02 | 0.957708 | 0.984 |
| SLC16A12  | -0.02 | 0.957708 | 0.984 |
| SLC26A3   | -0.02 | 0.957708 | 0.984 |
| SLC6A3    | -0.02 | 0.959907 | 0.985 |
| SMIM8     | -0.02 | 0.957708 | 0.984 |
| SPINT3    | -0.02 | 0.957708 | 0.984 |
| STK38L    | -0.02 | 0.957708 | 0.984 |
| SUPT20HL2 | -0.02 | 0.957708 | 0.984 |
| TAMM41    | -0.02 | 0.957708 | 0.984 |
| TEKT1     | -0.02 | 0.957708 | 0.984 |
| THG1L     | -0.02 | 0.957708 | 0.984 |
| TMEM194B  | -0.02 | 0.957708 | 0.984 |
| TMEM201   | -0.02 | 0.957708 | 0.984 |
| TMEM233   | -0.02 | 0.957708 | 0.984 |
| TMEM238   | -0.02 | 0.957708 | 0.984 |
| TNNC2     | -0.02 | 0.959907 | 0.985 |
| TP53TG3   | -0.02 | 0.957708 | 0.984 |
| TP53TG3B  | -0.02 | 0.957708 | 0.984 |
| TP53TG3C  | -0.02 | 0.957708 | 0.984 |
| TRAF3IP3  | -0.02 | 0.957708 | 0.984 |
| TRIM23    | -0.02 | 0.957708 | 0.984 |
| TRIM43B   | -0.02 | 0.957708 | 0.984 |
| TRIM50    | -0.02 | 0.957708 | 0.984 |
| TSPEAR    | -0.02 | 0.957708 | 0.984 |
| TSR2      | -0.02 | 0.959907 | 0.985 |
| TTC24     | -0.02 | 0.957708 | 0.984 |
| UBAP1     | -0.02 | 0.957708 | 0.984 |
| UNC5A     | -0.02 | 0.957708 | 0.984 |
| USP13     | -0.02 | 0.957708 | 0.984 |
| VAR5      | -0.02 | 0.966966 | 0.986 |
| ZNF493    | -0.02 | 0.957708 | 0.984 |
| ZNF564    | -0.02 | 0.957708 | 0.984 |
| ZSCAN10   | -0.02 | 0.957708 | 0.984 |
| ACOT4     | -0.01 | 0.971788 | 0.986 |
| AFMID     | -0.01 | 0.971789 | 0.986 |
| AGPAT4    | -0.01 | 0.971788 | 0.986 |
| AKAP10    | -0.01 | 0.971789 | 0.986 |
| ALDH1L2   | -0.01 | 0.971789 | 0.986 |
| ANP32C    | -0.01 | 0.97794  | 0.986 |
| APOLD1    | -0.01 | 0.971789 | 0.986 |
| ARHGAP12  | -0.01 | 0.971788 | 0.986 |
| ASIC5     | -0.01 | 0.971788 | 0.986 |
| ATAD5     | -0.01 | 0.973299 | 0.986 |
| C11orf53  | -0.01 | 0.973299 | 0.986 |

|           |       |          |       |
|-----------|-------|----------|-------|
| C12orf44  | -0.01 | 0.971788 | 0.986 |
| C2CD4D    | -0.01 | 0.971788 | 0.986 |
| C5orf22   | -0.01 | 0.971788 | 0.986 |
| CD1D      | -0.01 | 0.971788 | 0.986 |
| CDK9      | -0.01 | 0.974591 | 0.986 |
| CDY1      | -0.01 | 0.971789 | 0.986 |
| CDY1B     | -0.01 | 0.971789 | 0.986 |
| CFAP54    | -0.01 | 0.971788 | 0.986 |
| CKLF      | -0.01 | 0.971789 | 0.986 |
| CLEC18C   | -0.01 | 0.971789 | 0.986 |
| CLEC19A   | -0.01 | 0.971788 | 0.986 |
| COL6A6    | -0.01 | 0.971789 | 0.986 |
| CPNE3     | -0.01 | 0.971788 | 0.986 |
| CPXM1     | -0.01 | 0.971788 | 0.986 |
| CYB561    | -0.01 | 0.971788 | 0.986 |
| DEFB4B    | -0.01 | 0.971788 | 0.986 |
| DGCR14    | -0.01 | 0.973299 | 0.986 |
| DMD       | -0.01 | 0.971788 | 0.986 |
| DSC1      | -0.01 | 0.971789 | 0.986 |
| DSG1      | -0.01 | 0.971788 | 0.986 |
| FAM111A   | -0.01 | 0.971789 | 0.986 |
| FAM134A   | -0.01 | 0.971789 | 0.986 |
| FAM171B   | -0.01 | 0.971788 | 0.986 |
| FN1       | -0.01 | 0.973299 | 0.986 |
| FSIP1     | -0.01 | 0.971789 | 0.986 |
| GIPC2     | -0.01 | 0.971788 | 0.986 |
| GNAO1     | -0.01 | 0.971788 | 0.986 |
| GNG10     | -0.01 | 0.971788 | 0.986 |
| GOLGA8K   | -0.01 | 0.971789 | 0.986 |
| GRHPR     | -0.01 | 0.971788 | 0.986 |
| GSTA5     | -0.01 | 0.971788 | 0.986 |
| HTRA1     | -0.01 | 0.971788 | 0.986 |
| HYLS1     | -0.01 | 0.971788 | 0.986 |
| IL17F     | -0.01 | 0.971789 | 0.986 |
| IPO4      | -0.01 | 0.973298 | 0.986 |
| KCTD21    | -0.01 | 0.971788 | 0.986 |
| KIF25     | -0.01 | 0.971789 | 0.986 |
| KRTAP4-12 | -0.01 | 0.971788 | 0.986 |
| L1CAM     | -0.01 | 0.971789 | 0.986 |
| LCE3C     | -0.01 | 0.971789 | 0.986 |
| LCN12     | -0.01 | 0.973298 | 0.986 |
| LCN15     | -0.01 | 0.971789 | 0.986 |
| LMO1      | -0.01 | 0.971788 | 0.986 |
| LRRC24    | -0.01 | 0.971788 | 0.986 |
| LRRC8E    | -0.01 | 0.971788 | 0.986 |
| LSM3      | -0.01 | 0.971789 | 0.986 |
| LSM5      | -0.01 | 0.973299 | 0.986 |

|           |       |          |       |
|-----------|-------|----------|-------|
| LYRM7     | -0.01 | 0.971789 | 0.986 |
| MAGEE2    | -0.01 | 0.973299 | 0.986 |
| MAP3K6    | -0.01 | 0.971788 | 0.986 |
| MAP7      | -0.01 | 0.971788 | 0.986 |
| MCAT      | -0.01 | 0.971789 | 0.986 |
| MIA2      | -0.01 | 0.971789 | 0.986 |
| MISP      | -0.01 | 0.971789 | 0.986 |
| MORN5     | -0.01 | 0.971789 | 0.986 |
| NBPF12    | -0.01 | 0.981713 | 0.986 |
| NME2      | -0.01 | 0.971789 | 0.986 |
| NRN1L     | -0.01 | 0.971788 | 0.986 |
| NT5E      | -0.01 | 0.971788 | 0.986 |
| ODF3B     | -0.01 | 0.971788 | 0.986 |
| OR4N2     | -0.01 | 0.976372 | 0.986 |
| PDGFB     | -0.01 | 0.971789 | 0.986 |
| PHOSPHO1  | -0.01 | 0.971788 | 0.986 |
| PIGM      | -0.01 | 0.971789 | 0.986 |
| POLK      | -0.01 | 0.971788 | 0.986 |
| PPAPDC1A  | -0.01 | 0.971789 | 0.986 |
| PPP1R27   | -0.01 | 0.971789 | 0.986 |
| PREX2     | -0.01 | 0.971788 | 0.986 |
| RAB11FIP4 | -0.01 | 0.971789 | 0.986 |
| RAPGEF2   | -0.01 | 0.971789 | 0.986 |
| RFNG      | -0.01 | 0.971789 | 0.986 |
| RGPD5     | -0.01 | 0.971788 | 0.986 |
| RGPD6     | -0.01 | 0.971788 | 0.986 |
| RHOU      | -0.01 | 0.971789 | 0.986 |
| RNF19B    | -0.01 | 0.971788 | 0.986 |
| RPL7      | -0.01 | 0.973299 | 0.986 |
| RRAD      | -0.01 | 0.971789 | 0.986 |
| RSL1D1    | -0.01 | 0.971788 | 0.986 |
| SDHAF2    | -0.01 | 0.973299 | 0.986 |
| SIM2      | -0.01 | 0.971788 | 0.986 |
| SLC22A9   | -0.01 | 0.971789 | 0.986 |
| SLC4A4    | -0.01 | 0.971789 | 0.986 |
| SLC9B1    | -0.01 | 0.971789 | 0.986 |
| SPG20     | -0.01 | 0.973299 | 0.986 |
| SPINK8    | -0.01 | 0.971788 | 0.986 |
| SPINK9    | -0.01 | 0.971788 | 0.986 |
| STK17A    | -0.01 | 0.971788 | 0.986 |
| TBC1D10C  | -0.01 | 0.971789 | 0.986 |
| TBPL2     | -0.01 | 0.971789 | 0.986 |
| TBX15     | -0.01 | 0.971788 | 0.986 |
| THSD7A    | -0.01 | 0.971788 | 0.986 |
| TIGD7     | -0.01 | 0.971788 | 0.986 |
| TMEM249   | -0.01 | 0.971788 | 0.986 |
| TMEM63B   | -0.01 | 0.973298 | 0.986 |

|            |       |          |       |
|------------|-------|----------|-------|
| TMOD4      | -0.01 | 0.971788 | 0.986 |
| TPP2       | -0.01 | 0.973299 | 0.986 |
| TTC18      | -0.01 | 0.971788 | 0.986 |
| TTI1       | -0.01 | 0.973299 | 0.986 |
| TYMS       | -0.01 | 0.974591 | 0.986 |
| UBE2Q1     | -0.01 | 0.973299 | 0.986 |
| UTS2R      | -0.01 | 0.971788 | 0.986 |
| ZNF260     | -0.01 | 0.971789 | 0.986 |
| ZNF597     | -0.01 | 0.971788 | 0.986 |
| ZNF790     | -0.01 | 0.971788 | 0.986 |
| ZNF90      | -0.01 | 0.971789 | 0.986 |
| ZSCAN2     | -0.01 | 0.971789 | 0.986 |
| ABCB4      | 0     | 0.985881 | 0.986 |
| ACCS       | 0     | 0.986618 | 0.986 |
| ACSF2      | 0     | 0.98588  | 0.987 |
| ACTN1      | 0     | 0.98588  | 0.987 |
| ADAMTSL1   | 0     | 0.985881 | 0.986 |
| AIM2       | 0     | 0.985881 | 0.986 |
| ALDH3A1    | 0     | 0.985881 | 0.987 |
| ALDH8A1    | 0     | 0.98588  | 0.987 |
| ALOXE3     | 0     | 0.985881 | 0.987 |
| ANHX       | 0     | 0.98588  | 0.986 |
| ANPEP      | 0     | 0.985881 | 0.986 |
| ANXA11     | 0     | 0.98588  | 0.987 |
| ANXA9      | 0     | 0.985881 | 0.987 |
| AP1AR      | 0     | 0.985881 | 0.987 |
| APEX1      | 0     | 0.985881 | 0.986 |
| APOA1BP    | 0     | 0.98588  | 0.987 |
| AQP6       | 0     | 0.985881 | 0.986 |
| AQPEP      | 0     | 0.985881 | 0.986 |
| ARC        | 0     | 0.985881 | 0.986 |
| ARNT2      | 0     | 0.985881 | 0.987 |
| ASB10      | 0     | 0.985881 | 0.986 |
| ATP5S      | 0     | 0.985881 | 0.987 |
| ATP6V0C    | 0     | 0.989879 | 0.989 |
| BACH1      | 0     | 0.985881 | 0.987 |
| BIN3       | 0     | 0.985881 | 0.986 |
| C14orf166B | 0     | 0.98588  | 0.986 |
| C16orf92   | 0     | 0.985881 | 0.987 |
| C17orf104  | 0     | 0.985881 | 0.987 |
| C17orf64   | 0     | 0.985881 | 0.986 |
| C1QC       | 0     | 0.986619 | 0.987 |
| C1QL2      | 0     | 0.98588  | 0.987 |
| C21orf2    | 0     | 0.98588  | 0.986 |
| C5orf46    | 0     | 0.98588  | 0.986 |
| CA2        | 0     | 0.985881 | 0.987 |
| CA9        | 0     | 0.986618 | 0.986 |

|          |   |          |       |
|----------|---|----------|-------|
| CACNA2D2 | 0 | 0.985881 | 0.987 |
| CBS      | 0 | 0.98588  | 0.987 |
| CCDC114  | 0 | 0.985881 | 0.986 |
| CCDC182  | 0 | 0.986618 | 0.987 |
| CCDC40   | 0 | 0.986619 | 0.986 |
| CCDC85A  | 0 | 0.98588  | 0.987 |
| CCDC91   | 0 | 0.98588  | 0.987 |
| CCR8     | 0 | 0.98588  | 0.987 |
| CDK8     | 0 | 0.98588  | 0.987 |
| CENPI    | 0 | 0.985881 | 0.986 |
| CERS5    | 0 | 0.98588  | 0.986 |
| CETN3    | 0 | 0.985881 | 0.987 |
| CGB7     | 0 | 0.985881 | 0.987 |
| CHEK1    | 0 | 0.987253 | 0.987 |
| CHTF18   | 0 | 0.98588  | 0.986 |
| CLC      | 0 | 0.985881 | 0.987 |
| CMTM3    | 0 | 0.98588  | 0.987 |
| CNP      | 0 | 0.985881 | 0.986 |
| CPXM2    | 0 | 0.985881 | 0.986 |
| CSNK1E   | 0 | 0.986618 | 0.986 |
| DAP3     | 0 | 0.985881 | 0.987 |
| DBN1     | 0 | 0.985881 | 0.987 |
| DMXL2    | 0 | 0.985881 | 0.986 |
| DOCK2    | 0 | 0.985881 | 0.986 |
| DRD5     | 0 | 0.985881 | 0.987 |
| DVL1     | 0 | 0.98588  | 0.987 |
| E2F7     | 0 | 0.985881 | 0.986 |
| EBF2     | 0 | 0.985881 | 0.986 |
| EID2B    | 0 | 0.986619 | 0.987 |
| EMC7     | 0 | 0.986619 | 0.987 |
| EMD      | 0 | 0.98588  | 0.987 |
| EMX1     | 0 | 0.986618 | 0.987 |
| ENAH     | 0 | 0.987253 | 0.987 |
| EP300    | 0 | 0.987253 | 0.987 |
| ERP27    | 0 | 0.985881 | 0.987 |
| ERV3-1   | 0 | 0.985881 | 0.987 |
| FAM212B  | 0 | 0.985881 | 0.987 |
| FCRL6    | 0 | 0.98588  | 0.987 |
| FERMT1   | 0 | 0.98588  | 0.987 |
| FEZ2     | 0 | 0.986619 | 0.986 |
| FGF22    | 0 | 0.98588  | 0.987 |
| FHOD3    | 0 | 0.986618 | 0.986 |
| FRAS1    | 0 | 0.986618 | 0.987 |
| FSTL4    | 0 | 0.98588  | 0.986 |
| GGA1     | 0 | 0.985881 | 0.986 |
| GIMAP1   | 0 | 0.986618 | 0.987 |
| GORAB    | 0 | 0.986618 | 0.987 |

|           |   |          |       |
|-----------|---|----------|-------|
| GP9       | 0 | 0.985881 | 0.986 |
| GPR112    | 0 | 0.985881 | 0.987 |
| GPR132    | 0 | 0.988171 | 0.988 |
| GPR65     | 0 | 0.98588  | 0.986 |
| GRID2     | 0 | 0.985881 | 0.986 |
| GYS2      | 0 | 0.98588  | 0.987 |
| H2BFWT    | 0 | 0.985881 | 0.986 |
| HECTD4    | 0 | 0.985881 | 0.986 |
| HES4      | 0 | 0.98588  | 0.986 |
| HEYL      | 0 | 0.985881 | 0.987 |
| HGSNAT    | 0 | 0.985881 | 0.986 |
| HIST1H1C  | 0 | 0.98588  | 0.987 |
| HIST1H1E  | 0 | 0.985881 | 0.986 |
| HIST1H2AG | 0 | 0.987253 | 0.987 |
| HIST4H4   | 0 | 0.985881 | 0.986 |
| HOXD9     | 0 | 0.986618 | 0.987 |
| HRNR      | 0 | 0.986618 | 0.987 |
| HTR1E     | 0 | 0.986618 | 0.986 |
| IFNA8     | 0 | 0.985881 | 0.987 |
| INPP5K    | 0 | 0.985881 | 0.987 |
| IP6K3     | 0 | 0.985881 | 0.986 |
| ITGB3BP   | 0 | 0.98588  | 0.986 |
| KNTC1     | 0 | 0.98588  | 0.986 |
| KRTAP12-2 | 0 | 0.985881 | 0.987 |
| KY        | 0 | 0.985881 | 0.986 |
| LCE3A     | 0 | 0.98588  | 0.986 |
| LENEP     | 0 | 0.98588  | 0.986 |
| MADD      | 0 | 0.98588  | 0.987 |
| MAGEH1    | 0 | 0.985881 | 0.986 |
| MAST1     | 0 | 0.98588  | 0.986 |
| MBD3L5    | 0 | 0.985881 | 0.987 |
| MBOAT2    | 0 | 0.985881 | 0.987 |
| MED8      | 0 | 0.985881 | 0.986 |
| METRNL    | 0 | 0.985881 | 0.986 |
| MKRN3     | 0 | 0.986618 | 0.987 |
| MMP16     | 0 | 0.98588  | 0.987 |
| MORN4     | 0 | 0.98588  | 0.986 |
| MS4A14    | 0 | 0.985881 | 0.987 |
| MSMO1     | 0 | 0.985881 | 0.986 |
| MST1      | 0 | 0.985881 | 0.987 |
| MSX2      | 0 | 0.985881 | 0.987 |
| MUC1      | 0 | 0.986618 | 0.986 |
| MUC17     | 0 | 0.985881 | 0.987 |
| MURC      | 0 | 0.98588  | 0.986 |
| NAGK      | 0 | 0.98588  | 0.987 |
| NAPG      | 0 | 0.98588  | 0.987 |
| NATD1     | 0 | 0.988954 | 0.989 |

|           |   |          |       |
|-----------|---|----------|-------|
| NCK2      | 0 | 0.985881 | 0.987 |
| NDUFV3    | 0 | 0.985881 | 0.987 |
| NOTCH2NL  | 0 | 0.985881 | 0.986 |
| NPAP1     | 0 | 0.986618 | 0.987 |
| NPHS2     | 0 | 0.98588  | 0.986 |
| NUP107    | 0 | 0.986618 | 0.987 |
| NXPE2     | 0 | 0.985881 | 0.987 |
| ODF3L1    | 0 | 0.98588  | 0.986 |
| OGFRL1    | 0 | 0.98588  | 0.987 |
| OR10G7    | 0 | 0.985881 | 0.987 |
| OR1S1     | 0 | 0.98588  | 0.987 |
| OR4L1     | 0 | 0.98588  | 0.987 |
| OR51I1    | 0 | 0.98588  | 0.986 |
| OR6V1     | 0 | 0.98588  | 0.986 |
| OSBPL8    | 0 | 0.98588  | 0.986 |
| OTUD1     | 0 | 0.98588  | 0.986 |
| OVOL2     | 0 | 0.985881 | 0.987 |
| PCDHB10   | 0 | 0.986618 | 0.986 |
| PHGDH     | 0 | 0.98588  | 0.986 |
| PIP4K2C   | 0 | 0.98588  | 0.987 |
| PKP4      | 0 | 0.985881 | 0.986 |
| PLSCR2    | 0 | 0.985881 | 0.987 |
| PLSCR5    | 0 | 0.985881 | 0.986 |
| PNMA5     | 0 | 0.98588  | 0.986 |
| PRAMEF11  | 0 | 0.985881 | 0.987 |
| PRKCSH    | 0 | 0.985881 | 0.986 |
| PRKD1     | 0 | 0.986619 | 0.986 |
| PRR20A    | 0 | 0.985881 | 0.986 |
| PRR20B    | 0 | 0.98588  | 0.986 |
| PRR20C    | 0 | 0.98588  | 0.986 |
| PRR20D    | 0 | 0.98588  | 0.986 |
| PRR20E    | 0 | 0.985881 | 0.986 |
| PTPRN2    | 0 | 0.985881 | 0.987 |
| PTPRR     | 0 | 0.98588  | 0.986 |
| PUS7      | 0 | 0.986618 | 0.986 |
| PVALB     | 0 | 0.98588  | 0.987 |
| PYHIN1    | 0 | 0.98588  | 0.986 |
| QPRT      | 0 | 0.98588  | 0.987 |
| QRICH2    | 0 | 0.985881 | 0.986 |
| RAB11FIP2 | 0 | 0.985881 | 0.987 |
| RAB37     | 0 | 0.98588  | 0.986 |
| RAB43     | 0 | 0.985881 | 0.986 |
| RAC1      | 0 | 0.985881 | 0.987 |
| RAD1      | 0 | 0.985881 | 0.986 |
| RECQL5    | 0 | 0.985881 | 0.987 |
| RERGL     | 0 | 0.985881 | 0.986 |
| RHOJ      | 0 | 0.985881 | 0.986 |

|           |   |          |       |
|-----------|---|----------|-------|
| RNF115    | 0 | 0.985881 | 0.986 |
| RNF208    | 0 | 0.985881 | 0.987 |
| RNF25     | 0 | 0.98588  | 0.987 |
| RPL26     | 0 | 0.986618 | 0.986 |
| RPS19BP1  | 0 | 0.98588  | 0.986 |
| RYP1      | 0 | 0.985881 | 0.986 |
| SCARB1    | 0 | 0.986618 | 0.986 |
| SCRN1     | 0 | 0.985881 | 0.987 |
| SEPT10    | 0 | 0.985881 | 0.987 |
| SERPINE1  | 0 | 0.985881 | 0.986 |
| SLC23A1   | 0 | 0.986619 | 0.986 |
| SLC44A3   | 0 | 0.985881 | 0.987 |
| SLC50A1   | 0 | 0.985881 | 0.986 |
| SLC9A3R1  | 0 | 0.98588  | 0.986 |
| SPAG8     | 0 | 0.985881 | 0.987 |
| SPANXN2   | 0 | 0.98588  | 0.987 |
| SPIN3     | 0 | 0.98588  | 0.986 |
| SPINT2    | 0 | 0.985881 | 0.987 |
| SRXN1     | 0 | 0.985881 | 0.986 |
| ST3GAL3   | 0 | 0.985881 | 0.987 |
| STRA6     | 0 | 0.985881 | 0.987 |
| SUN3      | 0 | 0.985881 | 0.986 |
| SWSAP1    | 0 | 0.985881 | 0.986 |
| SYPL2     | 0 | 0.985881 | 0.986 |
| TDRD7     | 0 | 0.985881 | 0.987 |
| TESK2     | 0 | 0.986619 | 0.986 |
| TGM5      | 0 | 0.985881 | 0.986 |
| THSD1     | 0 | 0.985881 | 0.986 |
| TICAM2    | 0 | 0.985881 | 0.986 |
| TIMM17B   | 0 | 0.98588  | 0.986 |
| TIMP2     | 0 | 0.985881 | 0.986 |
| TLE2      | 0 | 0.985881 | 0.987 |
| TMEM39A   | 0 | 0.985881 | 0.987 |
| TMEM45A   | 0 | 0.985881 | 0.987 |
| TOR1AIP1  | 0 | 0.986618 | 0.987 |
| TPD52L2   | 0 | 0.985881 | 0.987 |
| TPP1      | 0 | 0.985881 | 0.987 |
| TRABD     | 0 | 0.98588  | 0.987 |
| TRIM66    | 0 | 0.98588  | 0.987 |
| TSGA10IP  | 0 | 0.985881 | 0.986 |
| TUFT1     | 0 | 0.985881 | 0.987 |
| TVP23C-CD | 0 | 0.987253 | 0.987 |
| TXNDC8    | 0 | 0.98588  | 0.987 |
| URB2      | 0 | 0.98588  | 0.986 |
| USP33     | 0 | 0.985881 | 0.987 |
| USP43     | 0 | 0.985881 | 0.987 |
| UXS1      | 0 | 0.98588  | 0.987 |

|           |      |          |       |
|-----------|------|----------|-------|
| VAPB      | 0    | 0.985881 | 0.986 |
| WDR92     | 0    | 0.98588  | 0.986 |
| WNT2      | 0    | 0.986618 | 0.986 |
| YWHAB     | 0    | 0.98588  | 0.986 |
| ZBTB21    | 0    | 0.986618 | 0.986 |
| ZFAND6    | 0    | 0.985881 | 0.986 |
| ZFYVE27   | 0    | 0.985881 | 0.987 |
| ZMYND12   | 0    | 0.98588  | 0.986 |
| ZNF16     | 0    | 0.985881 | 0.987 |
| ZNF230    | 0    | 0.98588  | 0.986 |
| ZNF57     | 0    | 0.98588  | 0.987 |
| ZNF585B   | 0    | 0.986618 | 0.987 |
| ZNF587B   | 0    | 0.986619 | 0.987 |
| ZNF705A   | 0    | 0.985881 | 0.986 |
| ZNF705G   | 0    | 0.98588  | 0.987 |
| ZNF81     | 0    | 0.98588  | 0.986 |
| ZZEF1     | 0    | 0.985881 | 0.986 |
| AATF      | 0.01 | 0.974591 | 0.986 |
| ABHD16B   | 0.01 | 0.973299 | 0.986 |
| AGBL2     | 0.01 | 0.971788 | 0.986 |
| AKNA      | 0.01 | 0.971789 | 0.986 |
| ARFIP1    | 0.01 | 0.971789 | 0.986 |
| ARMC10    | 0.01 | 0.971789 | 0.986 |
| BCL2L10   | 0.01 | 0.971788 | 0.986 |
| BRAP      | 0.01 | 0.973299 | 0.986 |
| C16orf59  | 0.01 | 0.971788 | 0.986 |
| C17orf53  | 0.01 | 0.971788 | 0.986 |
| C20orf196 | 0.01 | 0.971788 | 0.986 |
| C2orf88   | 0.01 | 0.971789 | 0.986 |
| C9orf91   | 0.01 | 0.971789 | 0.986 |
| CALHM3    | 0.01 | 0.971789 | 0.986 |
| CAMK2N1   | 0.01 | 0.971788 | 0.986 |
| CCDC122   | 0.01 | 0.974591 | 0.986 |
| CCDC69    | 0.01 | 0.971789 | 0.986 |
| CD63      | 0.01 | 0.971788 | 0.986 |
| CDK6      | 0.01 | 0.971788 | 0.986 |
| CEACAM7   | 0.01 | 0.971789 | 0.986 |
| CIAPIN1   | 0.01 | 0.971788 | 0.986 |
| CIZ1      | 0.01 | 0.971788 | 0.986 |
| CLDN19    | 0.01 | 0.971788 | 0.986 |
| CLEC4F    | 0.01 | 0.971789 | 0.986 |
| CLIC3     | 0.01 | 0.971788 | 0.986 |
| COPS7A    | 0.01 | 0.971789 | 0.986 |
| CORO1B    | 0.01 | 0.971789 | 0.986 |
| COX7A2L   | 0.01 | 0.971789 | 0.986 |
| CTBP2     | 0.01 | 0.973299 | 0.986 |
| DCDC1     | 0.01 | 0.971788 | 0.986 |

|            |      |          |       |
|------------|------|----------|-------|
| DDN        | 0.01 | 0.971788 | 0.986 |
| DDR1       | 0.01 | 0.973298 | 0.986 |
| DDX56      | 0.01 | 0.971788 | 0.986 |
| DOCK8      | 0.01 | 0.973298 | 0.986 |
| DTWD1      | 0.01 | 0.971788 | 0.986 |
| EBP        | 0.01 | 0.971788 | 0.986 |
| ELMO1      | 0.01 | 0.971788 | 0.986 |
| EVI5       | 0.01 | 0.971789 | 0.986 |
| FAM32A     | 0.01 | 0.973299 | 0.986 |
| FBXL19     | 0.01 | 0.973299 | 0.986 |
| FUS        | 0.01 | 0.971788 | 0.986 |
| FZD8       | 0.01 | 0.971788 | 0.986 |
| GJB7       | 0.01 | 0.971788 | 0.986 |
| GLRA1      | 0.01 | 0.971789 | 0.986 |
| GNAT3      | 0.01 | 0.971789 | 0.986 |
| GPR156     | 0.01 | 0.971788 | 0.986 |
| GRIFIN     | 0.01 | 0.979866 | 0.987 |
| GSTT2      | 0.01 | 0.971788 | 0.986 |
| HIST1H2BN  | 0.01 | 0.974591 | 0.986 |
| HS3ST6     | 0.01 | 0.973299 | 0.986 |
| HSDL1      | 0.01 | 0.971788 | 0.986 |
| HTRA4      | 0.01 | 0.971788 | 0.986 |
| ICAM1      | 0.01 | 0.971789 | 0.986 |
| IFFO1      | 0.01 | 0.971789 | 0.986 |
| KLHL29     | 0.01 | 0.971788 | 0.986 |
| KPNA5      | 0.01 | 0.971789 | 0.986 |
| KTN1       | 0.01 | 0.971789 | 0.986 |
| LAMC3      | 0.01 | 0.971789 | 0.986 |
| LIN7C      | 0.01 | 0.971789 | 0.986 |
| LIPE       | 0.01 | 0.971788 | 0.986 |
| LPPR1      | 0.01 | 0.971788 | 0.986 |
| LRCH2      | 0.01 | 0.971789 | 0.986 |
| LY75       | 0.01 | 0.971789 | 0.986 |
| LY75-CD302 | 0.01 | 0.971789 | 0.986 |
| MAG        | 0.01 | 0.971789 | 0.986 |
| MAP3K10    | 0.01 | 0.971788 | 0.986 |
| METTL21C   | 0.01 | 0.971789 | 0.986 |
| MMP15      | 0.01 | 0.971789 | 0.986 |
| MS4A13     | 0.01 | 0.981713 | 0.987 |
| MTA1       | 0.01 | 0.973299 | 0.986 |
| NEFM       | 0.01 | 0.973299 | 0.986 |
| NPW        | 0.01 | 0.971789 | 0.986 |
| OPRL1      | 0.01 | 0.971789 | 0.986 |
| OR4S1      | 0.01 | 0.971788 | 0.986 |
| OXNAD1     | 0.01 | 0.971788 | 0.986 |
| PCYOX1L    | 0.01 | 0.971789 | 0.986 |
| PLEKHA5    | 0.01 | 0.971788 | 0.986 |

|          |      |          |       |
|----------|------|----------|-------|
| POP4     | 0.01 | 0.973299 | 0.986 |
| PTPLAD2  | 0.01 | 0.971788 | 0.986 |
| RALGAPA1 | 0.01 | 0.971788 | 0.986 |
| RBBP8NL  | 0.01 | 0.971788 | 0.986 |
| RNPEPL1  | 0.01 | 0.973299 | 0.986 |
| RPL10L   | 0.01 | 0.971789 | 0.986 |
| RRAGA    | 0.01 | 0.973299 | 0.986 |
| RTP2     | 0.01 | 0.971788 | 0.986 |
| S100A8   | 0.01 | 0.971788 | 0.986 |
| SAP30BP  | 0.01 | 0.974591 | 0.986 |
| SBSN     | 0.01 | 0.973299 | 0.986 |
| SCOC     | 0.01 | 0.971789 | 0.986 |
| SERPINA4 | 0.01 | 0.971789 | 0.986 |
| SMARCAD1 | 0.01 | 0.971789 | 0.986 |
| SMARCD1  | 0.01 | 0.971788 | 0.986 |
| SPRR2E   | 0.01 | 0.971789 | 0.986 |
| STK33    | 0.01 | 0.973298 | 0.986 |
| TBRG4    | 0.01 | 0.973299 | 0.986 |
| TECR     | 0.01 | 0.971788 | 0.986 |
| THYN1    | 0.01 | 0.971789 | 0.986 |
| TMEM170B | 0.01 | 0.971789 | 0.986 |
| TMEM177  | 0.01 | 0.971788 | 0.986 |
| TMEM251  | 0.01 | 0.971789 | 0.986 |
| TMEM5    | 0.01 | 0.971789 | 0.986 |
| TMEM81   | 0.01 | 0.971788 | 0.986 |
| TNFAIP1  | 0.01 | 0.971788 | 0.986 |
| TSPO2    | 0.01 | 0.971788 | 0.986 |
| TTC26    | 0.01 | 0.971789 | 0.986 |
| TWF1     | 0.01 | 0.971788 | 0.986 |
| TXNDC16  | 0.01 | 0.971788 | 0.986 |
| UBAC1    | 0.01 | 0.971788 | 0.986 |
| ZDHHC11  | 0.01 | 0.971788 | 0.986 |
| ZNF134   | 0.01 | 0.971788 | 0.986 |
| ZNF200   | 0.01 | 0.971788 | 0.986 |
| ZNF214   | 0.01 | 0.971789 | 0.986 |
| ZNF433   | 0.01 | 0.971789 | 0.986 |
| ZNF492   | 0.01 | 0.971788 | 0.986 |
| ZNF532   | 0.01 | 0.971789 | 0.986 |
| ZNF598   | 0.01 | 0.971789 | 0.986 |
| AAGAB    | 0.02 | 0.957708 | 0.984 |
| AANAT    | 0.02 | 0.957708 | 0.984 |
| ABCB1    | 0.02 | 0.957708 | 0.984 |
| ACADL    | 0.02 | 0.957708 | 0.984 |
| ADAMTS18 | 0.02 | 0.957708 | 0.984 |
| ADCY2    | 0.02 | 0.957708 | 0.984 |
| ANKRD54  | 0.02 | 0.957708 | 0.984 |
| AP3B2    | 0.02 | 0.957708 | 0.984 |

|          |      |          |       |
|----------|------|----------|-------|
| ATP10D   | 0.02 | 0.957708 | 0.984 |
| ATP5B    | 0.02 | 0.957708 | 0.984 |
| BLOC1S5  | 0.02 | 0.957708 | 0.984 |
| BMP8A    | 0.02 | 0.957708 | 0.984 |
| BORCS8   | 0.02 | 0.959907 | 0.984 |
| C11orf88 | 0.02 | 0.957708 | 0.984 |
| C12orf29 | 0.02 | 0.957708 | 0.984 |
| C1QTNF2  | 0.02 | 0.957708 | 0.984 |
| C20orf27 | 0.02 | 0.957708 | 0.984 |
| C7orf72  | 0.02 | 0.957708 | 0.984 |
| C8orf76  | 0.02 | 0.957708 | 0.984 |
| CA7      | 0.02 | 0.957708 | 0.984 |
| CALCOCO1 | 0.02 | 0.957708 | 0.984 |
| CASC1    | 0.02 | 0.957708 | 0.984 |
| CBWD2    | 0.02 | 0.957708 | 0.984 |
| CBWD5    | 0.02 | 0.957708 | 0.984 |
| CDH7     | 0.02 | 0.957708 | 0.984 |
| CHIA     | 0.02 | 0.957708 | 0.984 |
| CLDN8    | 0.02 | 0.957708 | 0.984 |
| CLEC12B  | 0.02 | 0.957708 | 0.984 |
| CNGA2    | 0.02 | 0.957708 | 0.984 |
| EPHA10   | 0.02 | 0.957708 | 0.984 |
| FAM21B   | 0.02 | 0.959907 | 0.984 |
| FAM49A   | 0.02 | 0.957708 | 0.984 |
| FBXL20   | 0.02 | 0.957708 | 0.984 |
| FBXO16   | 0.02 | 0.957708 | 0.984 |
| FBXO30   | 0.02 | 0.957708 | 0.984 |
| FOXD4L6  | 0.02 | 0.957708 | 0.984 |
| GCGR     | 0.02 | 0.957708 | 0.984 |
| GGT5     | 0.02 | 0.957708 | 0.984 |
| GLA      | 0.02 | 0.957708 | 0.984 |
| GNA15    | 0.02 | 0.957708 | 0.984 |
| GPR179   | 0.02 | 0.959907 | 0.984 |
| HCN1     | 0.02 | 0.959907 | 0.984 |
| HHIPL1   | 0.02 | 0.957708 | 0.984 |
| HLA-DMB  | 0.02 | 0.957708 | 0.984 |
| HTR2B    | 0.02 | 0.957708 | 0.984 |
| IFIT5    | 0.02 | 0.957708 | 0.984 |
| ITIH4    | 0.02 | 0.957708 | 0.984 |
| KCNA7    | 0.02 | 0.957708 | 0.984 |
| KRT10    | 0.02 | 0.957708 | 0.984 |
| KRT6A    | 0.02 | 0.957708 | 0.984 |
| KRTAP4-9 | 0.02 | 0.957708 | 0.984 |
| LCE3B    | 0.02 | 0.957708 | 0.984 |
| LINGO4   | 0.02 | 0.957708 | 0.984 |
| LRRC16A  | 0.02 | 0.959907 | 0.984 |
| MED30    | 0.02 | 0.957708 | 0.984 |

|          |      |          |       |
|----------|------|----------|-------|
| MEF2B    | 0.02 | 0.959907 | 0.984 |
| MFF      | 0.02 | 0.957708 | 0.984 |
| MOCS2    | 0.02 | 0.957708 | 0.984 |
| MPP1     | 0.02 | 0.959906 | 0.984 |
| MPZL3    | 0.02 | 0.957708 | 0.984 |
| MTCH1    | 0.02 | 0.957708 | 0.984 |
| MYCN     | 0.02 | 0.957708 | 0.984 |
| MYPN     | 0.02 | 0.959906 | 0.984 |
| NECAB1   | 0.02 | 0.957708 | 0.984 |
| NFYA     | 0.02 | 0.961782 | 0.985 |
| NIPAL4   | 0.02 | 0.957708 | 0.984 |
| NOP16    | 0.02 | 0.959907 | 0.984 |
| NPR3     | 0.02 | 0.957708 | 0.984 |
| OBSL1    | 0.02 | 0.961782 | 0.985 |
| OPALIN   | 0.02 | 0.957708 | 0.984 |
| OSBP2    | 0.02 | 0.959907 | 0.984 |
| P2RX3    | 0.02 | 0.957708 | 0.984 |
| PANX3    | 0.02 | 0.957708 | 0.984 |
| PCDH7    | 0.02 | 0.957708 | 0.984 |
| PDE6D    | 0.02 | 0.957708 | 0.984 |
| PEG3     | 0.02 | 0.957708 | 0.984 |
| PIH1D2   | 0.02 | 0.957708 | 0.984 |
| PIK3CA   | 0.02 | 0.957708 | 0.984 |
| PJA1     | 0.02 | 0.957708 | 0.984 |
| PKM      | 0.02 | 0.957708 | 0.984 |
| PLEKHG4B | 0.02 | 0.957708 | 0.984 |
| PPAPDC3  | 0.02 | 0.957708 | 0.984 |
| PRDX5    | 0.02 | 0.957708 | 0.984 |
| PTPN18   | 0.02 | 0.957708 | 0.984 |
| RCL1     | 0.02 | 0.959907 | 0.984 |
| RCOR1    | 0.02 | 0.957708 | 0.984 |
| RELA     | 0.02 | 0.957708 | 0.984 |
| RFTN1    | 0.02 | 0.957708 | 0.984 |
| ROBO3    | 0.02 | 0.957708 | 0.984 |
| RPA2     | 0.02 | 0.957708 | 0.984 |
| RPS14    | 0.02 | 0.961782 | 0.985 |
| RTF1     | 0.02 | 0.959907 | 0.984 |
| SLAIN1   | 0.02 | 0.959907 | 0.984 |
| SLC39A3  | 0.02 | 0.957708 | 0.984 |
| SLC5A1   | 0.02 | 0.959907 | 0.984 |
| SLFN14   | 0.02 | 0.957708 | 0.984 |
| SLITRK6  | 0.02 | 0.957708 | 0.984 |
| SMAD3    | 0.02 | 0.957708 | 0.984 |
| SNX30    | 0.02 | 0.957708 | 0.984 |
| SPESP1   | 0.02 | 0.957708 | 0.984 |
| SUPT20H  | 0.02 | 0.959906 | 0.984 |
| SUPT4H1  | 0.02 | 0.957708 | 0.984 |

|          |      |          |       |
|----------|------|----------|-------|
| SYCE3    | 0.02 | 0.957708 | 0.984 |
| TBX18    | 0.02 | 0.957708 | 0.984 |
| TCF7L1   | 0.02 | 0.957708 | 0.984 |
| TMEM141  | 0.02 | 0.957708 | 0.984 |
| TMEM18   | 0.02 | 0.957708 | 0.984 |
| TMPRSS5  | 0.02 | 0.959907 | 0.984 |
| TOP3B    | 0.02 | 0.957708 | 0.984 |
| TRIM36   | 0.02 | 0.957708 | 0.984 |
| TSC22D1  | 0.02 | 0.957708 | 0.984 |
| TSR1     | 0.02 | 0.957708 | 0.984 |
| VSTM1    | 0.02 | 0.957708 | 0.984 |
| WDR17    | 0.02 | 0.957708 | 0.984 |
| XRCC6    | 0.02 | 0.957708 | 0.984 |
| XRN2     | 0.02 | 0.964588 | 0.986 |
| ZC3H12A  | 0.02 | 0.957708 | 0.984 |
| ZHX3     | 0.02 | 0.959907 | 0.984 |
| ZNF146   | 0.02 | 0.957708 | 0.984 |
| ZNF474   | 0.02 | 0.957708 | 0.984 |
| ZNF577   | 0.02 | 0.957708 | 0.984 |
| ZNF784   | 0.02 | 0.961782 | 0.985 |
| ZNF835   | 0.02 | 0.959907 | 0.984 |
| ZNFX1    | 0.02 | 0.959907 | 0.984 |
| ZNRD1    | 0.02 | 0.957708 | 0.984 |
| ZSCAN25  | 0.02 | 0.959906 | 0.984 |
| AADAC    | 0.03 | 0.9436   | 0.983 |
| ABCG2    | 0.03 | 0.946631 | 0.983 |
| ACVRL1   | 0.03 | 0.9436   | 0.983 |
| AGMO     | 0.03 | 0.9436   | 0.983 |
| ANAPC16  | 0.03 | 0.9436   | 0.983 |
| APOL5    | 0.03 | 0.9436   | 0.983 |
| ARL8A    | 0.03 | 0.9436   | 0.983 |
| ASS1     | 0.03 | 0.9436   | 0.983 |
| BMF      | 0.03 | 0.9436   | 0.983 |
| BZRAP1   | 0.03 | 0.9436   | 0.983 |
| C15orf57 | 0.03 | 0.94663  | 0.983 |
| C5orf49  | 0.03 | 0.9436   | 0.983 |
| C5orf64  | 0.03 | 0.9436   | 0.983 |
| CACNG1   | 0.03 | 0.9436   | 0.983 |
| CAMK2B   | 0.03 | 0.9436   | 0.983 |
| CAPN1    | 0.03 | 0.9436   | 0.983 |
| CASP5    | 0.03 | 0.9436   | 0.983 |
| CBFA2T3  | 0.03 | 0.9436   | 0.983 |
| CCHCR1   | 0.03 | 0.946631 | 0.983 |
| CDC37    | 0.03 | 0.94663  | 0.983 |
| CHRD     | 0.03 | 0.9436   | 0.983 |
| CNNM2    | 0.03 | 0.946631 | 0.983 |
| CNTD2    | 0.03 | 0.9436   | 0.983 |

|           |      |          |       |
|-----------|------|----------|-------|
| CNTFR     | 0.03 | 0.94663  | 0.983 |
| CRELD2    | 0.03 | 0.94663  | 0.983 |
| CTNNA1    | 0.03 | 0.9436   | 0.983 |
| CXCL5     | 0.03 | 0.9436   | 0.983 |
| CYP4F12   | 0.03 | 0.9436   | 0.983 |
| DDX19A    | 0.03 | 0.94663  | 0.983 |
| DMKN      | 0.03 | 0.9436   | 0.983 |
| DNAJC21   | 0.03 | 0.9436   | 0.983 |
| DPEP2     | 0.03 | 0.9436   | 0.983 |
| DYRK1B    | 0.03 | 0.9436   | 0.983 |
| EDA       | 0.03 | 0.9436   | 0.983 |
| EEA1      | 0.03 | 0.9436   | 0.983 |
| ESCO2     | 0.03 | 0.9436   | 0.983 |
| FAM151A   | 0.03 | 0.9436   | 0.983 |
| FAM222B   | 0.03 | 0.9436   | 0.983 |
| FAM26D    | 0.03 | 0.9436   | 0.983 |
| FAM47A    | 0.03 | 0.9436   | 0.983 |
| FAM89A    | 0.03 | 0.94663  | 0.983 |
| FGD4      | 0.03 | 0.946631 | 0.983 |
| FGF6      | 0.03 | 0.9436   | 0.983 |
| FOXD1     | 0.03 | 0.949173 | 0.984 |
| FOXP4     | 0.03 | 0.946631 | 0.983 |
| GBAS      | 0.03 | 0.9436   | 0.983 |
| GCSAML    | 0.03 | 0.9436   | 0.983 |
| GDF11     | 0.03 | 0.9436   | 0.983 |
| GSDMB     | 0.03 | 0.9436   | 0.983 |
| GSG1L2    | 0.03 | 0.949174 | 0.984 |
| HIBADH    | 0.03 | 0.9436   | 0.983 |
| HIST1H4A  | 0.03 | 0.9436   | 0.983 |
| HSD11B1L  | 0.03 | 0.952671 | 0.984 |
| HUS1B     | 0.03 | 0.9436   | 0.983 |
| IGF2BP2   | 0.03 | 0.9436   | 0.983 |
| IL26      | 0.03 | 0.9436   | 0.983 |
| IZUMO4    | 0.03 | 0.9436   | 0.983 |
| KCNH1     | 0.03 | 0.9436   | 0.983 |
| KIAA1244  | 0.03 | 0.9436   | 0.983 |
| KIAA1468  | 0.03 | 0.9436   | 0.983 |
| KIF12     | 0.03 | 0.94663  | 0.983 |
| KIRREL    | 0.03 | 0.9436   | 0.983 |
| KRT19     | 0.03 | 0.9436   | 0.983 |
| KRT36     | 0.03 | 0.9436   | 0.983 |
| KRT37     | 0.03 | 0.9436   | 0.983 |
| KRTAP13-3 | 0.03 | 0.9436   | 0.983 |
| LCE2C     | 0.03 | 0.9436   | 0.983 |
| LCN2      | 0.03 | 0.9436   | 0.983 |
| LEAP2     | 0.03 | 0.9436   | 0.983 |
| LPPR5     | 0.03 | 0.9436   | 0.983 |

|           |      |          |       |
|-----------|------|----------|-------|
| LRRC6     | 0.03 | 0.9436   | 0.983 |
| MARCH8    | 0.03 | 0.9436   | 0.983 |
| MEGF10    | 0.03 | 0.9436   | 0.983 |
| MINA      | 0.03 | 0.949174 | 0.984 |
| MLLT4     | 0.03 | 0.94663  | 0.983 |
| MME       | 0.03 | 0.9436   | 0.983 |
| MPP3      | 0.03 | 0.9436   | 0.983 |
| NCAPG     | 0.03 | 0.94663  | 0.983 |
| NCR3LG1   | 0.03 | 0.9436   | 0.983 |
| NGB       | 0.03 | 0.9436   | 0.983 |
| NGRN      | 0.03 | 0.9436   | 0.983 |
| NKX6-2    | 0.03 | 0.9436   | 0.983 |
| NME1-NME2 | 0.03 | 0.9436   | 0.983 |
| NUDT13    | 0.03 | 0.9436   | 0.983 |
| OVCH1     | 0.03 | 0.9436   | 0.983 |
| PGA5      | 0.03 | 0.9436   | 0.983 |
| PHLPP2    | 0.03 | 0.9436   | 0.983 |
| PLCD4     | 0.03 | 0.9436   | 0.983 |
| PLXNA4    | 0.03 | 0.9436   | 0.983 |
| PNPO      | 0.03 | 0.946631 | 0.983 |
| POLR3H    | 0.03 | 0.946631 | 0.983 |
| PP2D1     | 0.03 | 0.9436   | 0.983 |
| PRAMEF25  | 0.03 | 0.963433 | 0.986 |
| PTGER1    | 0.03 | 0.9436   | 0.983 |
| PYGO1     | 0.03 | 0.9436   | 0.983 |
| RAD51AP1  | 0.03 | 0.9436   | 0.983 |
| RAMP2     | 0.03 | 0.9436   | 0.983 |
| RD3L      | 0.03 | 0.9436   | 0.983 |
| RNF165    | 0.03 | 0.9436   | 0.983 |
| RPL29     | 0.03 | 0.9436   | 0.983 |
| RRAGD     | 0.03 | 0.946631 | 0.983 |
| SCAMP5    | 0.03 | 0.9436   | 0.983 |
| SEMG2     | 0.03 | 0.946631 | 0.983 |
| SFRP1     | 0.03 | 0.946631 | 0.983 |
| SLC25A48  | 0.03 | 0.9436   | 0.983 |
| SLC25A53  | 0.03 | 0.9436   | 0.983 |
| SNAP29    | 0.03 | 0.9436   | 0.983 |
| SNRNP25   | 0.03 | 0.94663  | 0.983 |
| SNRPD3    | 0.03 | 0.955928 | 0.984 |
| SSPN      | 0.03 | 0.9436   | 0.983 |
| SUPV3L1   | 0.03 | 0.946631 | 0.983 |
| SYCE1     | 0.03 | 0.9436   | 0.983 |
| TBC1D28   | 0.03 | 0.94663  | 0.983 |
| TCFL5     | 0.03 | 0.94663  | 0.983 |
| TRIB3     | 0.03 | 0.9436   | 0.983 |
| TRIM47    | 0.03 | 0.9436   | 0.983 |
| TTC21A    | 0.03 | 0.9436   | 0.983 |

|          |      |          |       |
|----------|------|----------|-------|
| UBL4B    | 0.03 | 0.9436   | 0.983 |
| USB1     | 0.03 | 0.9436   | 0.983 |
| USP17L2  | 0.03 | 0.946631 | 0.983 |
| ZCCHC10  | 0.03 | 0.94663  | 0.983 |
| ZCCHC8   | 0.03 | 0.946631 | 0.983 |
| ZDBF2    | 0.03 | 0.9436   | 0.983 |
| ZFP28    | 0.03 | 0.9436   | 0.983 |
| ZNF157   | 0.03 | 0.9436   | 0.983 |
| ZNF225   | 0.03 | 0.9436   | 0.983 |
| ZNF781   | 0.03 | 0.94663  | 0.983 |
| ZNF91    | 0.03 | 0.9436   | 0.983 |
| ADAMTS7  | 0.04 | 0.929593 | 0.981 |
| ADCYAP1  | 0.04 | 0.929592 | 0.981 |
| ALB      | 0.04 | 0.929593 | 0.981 |
| AMZ2     | 0.04 | 0.929593 | 0.981 |
| ANKRD66  | 0.04 | 0.929592 | 0.981 |
| ANTXR2   | 0.04 | 0.929592 | 0.981 |
| ARAP1    | 0.04 | 0.929592 | 0.981 |
| AREG     | 0.04 | 0.929592 | 0.981 |
| ASH1L    | 0.04 | 0.929593 | 0.981 |
| ATP2B4   | 0.04 | 0.929593 | 0.981 |
| B3GALNT2 | 0.04 | 0.929593 | 0.981 |
| BCL2L13  | 0.04 | 0.929592 | 0.981 |
| BPIFA1   | 0.04 | 0.93325  | 0.983 |
| BSND     | 0.04 | 0.929592 | 0.981 |
| C9orf84  | 0.04 | 0.929592 | 0.981 |
| CCDC140  | 0.04 | 0.929593 | 0.981 |
| CCL17    | 0.04 | 0.929592 | 0.981 |
| CDC42SE2 | 0.04 | 0.929592 | 0.981 |
| CDK16    | 0.04 | 0.929592 | 0.981 |
| CNTN3    | 0.04 | 0.929593 | 0.981 |
| CRY2     | 0.04 | 0.929593 | 0.981 |
| CYC1     | 0.04 | 0.929593 | 0.981 |
| DNAH7    | 0.04 | 0.929593 | 0.981 |
| DOK4     | 0.04 | 0.929593 | 0.981 |
| DUSP18   | 0.04 | 0.929592 | 0.981 |
| DYNC1H1  | 0.04 | 0.944907 | 0.983 |
| EARS2    | 0.04 | 0.929592 | 0.981 |
| FAIM2    | 0.04 | 0.929593 | 0.981 |
| FAM53C   | 0.04 | 0.93325  | 0.983 |
| FARSA    | 0.04 | 0.93655  | 0.983 |
| GATM     | 0.04 | 0.933251 | 0.983 |
| GFI1B    | 0.04 | 0.929593 | 0.981 |
| GRIA1    | 0.04 | 0.929592 | 0.981 |
| GTSF1    | 0.04 | 0.929593 | 0.981 |
| HCAR1    | 0.04 | 0.93655  | 0.983 |
| HJURP    | 0.04 | 0.93325  | 0.983 |

|          |      |          |       |
|----------|------|----------|-------|
| HMGS2    | 0.04 | 0.929593 | 0.981 |
| HTR2A    | 0.04 | 0.933251 | 0.983 |
| IGFBP4   | 0.04 | 0.929593 | 0.981 |
| IGFBP6   | 0.04 | 0.929593 | 0.981 |
| IRX3     | 0.04 | 0.929593 | 0.981 |
| KIAA1715 | 0.04 | 0.929593 | 0.981 |
| KLF3     | 0.04 | 0.929592 | 0.981 |
| KLHL30   | 0.04 | 0.933251 | 0.983 |
| KLHL42   | 0.04 | 0.933251 | 0.983 |
| LGR5     | 0.04 | 0.929592 | 0.981 |
| LHX4     | 0.04 | 0.929593 | 0.981 |
| MAFA     | 0.04 | 0.929593 | 0.981 |
| MAP3K1   | 0.04 | 0.93325  | 0.983 |
| MARC2    | 0.04 | 0.929593 | 0.981 |
| MTM1     | 0.04 | 0.929593 | 0.981 |
| MTUS2    | 0.04 | 0.933251 | 0.983 |
| NDRG4    | 0.04 | 0.933251 | 0.983 |
| NDUFAF3  | 0.04 | 0.929593 | 0.981 |
| NECAB3   | 0.04 | 0.929593 | 0.981 |
| NEURL    | 0.04 | 0.929592 | 0.981 |
| NKX2-6   | 0.04 | 0.929592 | 0.981 |
| NTNG1    | 0.04 | 0.929592 | 0.981 |
| OR2A5    | 0.04 | 0.929592 | 0.981 |
| OR51B2   | 0.04 | 0.929592 | 0.981 |
| OR52I1   | 0.04 | 0.929592 | 0.981 |
| OR9G4    | 0.04 | 0.933251 | 0.983 |
| OSBPL10  | 0.04 | 0.929593 | 0.981 |
| PABPC3   | 0.04 | 0.929592 | 0.981 |
| PAPLN    | 0.04 | 0.929592 | 0.981 |
| PARP9    | 0.04 | 0.929593 | 0.981 |
| PDPR     | 0.04 | 0.929593 | 0.981 |
| PDYN     | 0.04 | 0.929592 | 0.981 |
| PHKG2    | 0.04 | 0.929593 | 0.981 |
| PHOSPHO2 | 0.04 | 0.929593 | 0.981 |
| PPP1R7   | 0.04 | 0.929593 | 0.981 |
| PRAMEF26 | 0.04 | 0.954269 | 0.984 |
| PRR4     | 0.04 | 0.929592 | 0.981 |
| PSG8     | 0.04 | 0.929592 | 0.981 |
| PSG9     | 0.04 | 0.933251 | 0.983 |
| PSTPIP1  | 0.04 | 0.929592 | 0.981 |
| PTP4A2   | 0.04 | 0.929593 | 0.981 |
| RAB17    | 0.04 | 0.929593 | 0.981 |
| RAPGEF6  | 0.04 | 0.929593 | 0.981 |
| RGAG4    | 0.04 | 0.929592 | 0.981 |
| RGS6     | 0.04 | 0.929593 | 0.981 |
| RIOK3    | 0.04 | 0.929593 | 0.981 |
| RMI2     | 0.04 | 0.929593 | 0.981 |

|           |      |          |       |
|-----------|------|----------|-------|
| RPS6KB2   | 0.04 | 0.933251 | 0.983 |
| SH3TC1    | 0.04 | 0.93325  | 0.983 |
| SLC22A31  | 0.04 | 0.93655  | 0.983 |
| SLC27A1   | 0.04 | 0.929593 | 0.981 |
| SLC39A1   | 0.04 | 0.929593 | 0.981 |
| SLN       | 0.04 | 0.949556 | 0.984 |
| SMAD5     | 0.04 | 0.929593 | 0.981 |
| SPATA17   | 0.04 | 0.929592 | 0.981 |
| SRSF2     | 0.04 | 0.944907 | 0.983 |
| SRSF7     | 0.04 | 0.929592 | 0.981 |
| STAU2     | 0.04 | 0.929592 | 0.981 |
| STXBP5    | 0.04 | 0.929593 | 0.981 |
| SV2A      | 0.04 | 0.929593 | 0.981 |
| SYMPK     | 0.04 | 0.929592 | 0.981 |
| SYT16     | 0.04 | 0.929593 | 0.981 |
| SYT4      | 0.04 | 0.933251 | 0.983 |
| THSD7B    | 0.04 | 0.93325  | 0.983 |
| TMPRSS11E | 0.04 | 0.929593 | 0.981 |
| TNKS2     | 0.04 | 0.929593 | 0.981 |
| TRH       | 0.04 | 0.929593 | 0.981 |
| TRIM16L   | 0.04 | 0.929592 | 0.981 |
| TRUB1     | 0.04 | 0.929592 | 0.981 |
| TSPAN14   | 0.04 | 0.929592 | 0.981 |
| TWIST1    | 0.04 | 0.929593 | 0.981 |
| VCX3A     | 0.04 | 0.929592 | 0.981 |
| VPS51     | 0.04 | 0.93325  | 0.983 |
| WDPCP     | 0.04 | 0.929593 | 0.981 |
| WHSC1L1   | 0.04 | 0.929592 | 0.981 |
| WWP1      | 0.04 | 0.929593 | 0.981 |
| ZADH2     | 0.04 | 0.929592 | 0.981 |
| ZFYVE16   | 0.04 | 0.933251 | 0.983 |
| ZNF2      | 0.04 | 0.929593 | 0.981 |
| ZNF367    | 0.04 | 0.933251 | 0.983 |
| ZNF414    | 0.04 | 0.929593 | 0.981 |
| ZNF45     | 0.04 | 0.929593 | 0.981 |
| ZNF484    | 0.04 | 0.929593 | 0.981 |
| ZNF718    | 0.04 | 0.94082  | 0.983 |
| ACRBP     | 0.05 | 0.919868 | 0.981 |
| ADRB3     | 0.05 | 0.919868 | 0.981 |
| AHCYL2    | 0.05 | 0.91565  | 0.979 |
| ALDOA     | 0.05 | 0.929051 | 0.981 |
| ALG10     | 0.05 | 0.91565  | 0.979 |
| ALPL      | 0.05 | 0.91565  | 0.979 |
| ANAPC7    | 0.05 | 0.91565  | 0.979 |
| ANKRD53   | 0.05 | 0.91565  | 0.979 |
| BNIP1     | 0.05 | 0.91565  | 0.979 |
| C11orf80  | 0.05 | 0.91565  | 0.979 |

|           |      |          |       |
|-----------|------|----------|-------|
| C17orf66  | 0.05 | 0.91565  | 0.979 |
| C19orf57  | 0.05 | 0.91565  | 0.979 |
| C2CD2L    | 0.05 | 0.91565  | 0.979 |
| C2orf43   | 0.05 | 0.91565  | 0.979 |
| C3orf38   | 0.05 | 0.91565  | 0.979 |
| C3orf84   | 0.05 | 0.91565  | 0.979 |
| C7orf69   | 0.05 | 0.919868 | 0.981 |
| CALN1     | 0.05 | 0.91565  | 0.979 |
| CAMK1G    | 0.05 | 0.91565  | 0.979 |
| CARS      | 0.05 | 0.91565  | 0.979 |
| CCDC73    | 0.05 | 0.91565  | 0.979 |
| CCDC84    | 0.05 | 0.919867 | 0.981 |
| CCDC97    | 0.05 | 0.91565  | 0.979 |
| CCS       | 0.05 | 0.91565  | 0.979 |
| CDHR4     | 0.05 | 0.919867 | 0.981 |
| CEP95     | 0.05 | 0.91565  | 0.979 |
| CLEC14A   | 0.05 | 0.91565  | 0.979 |
| CLNK      | 0.05 | 0.91565  | 0.979 |
| CLSPN     | 0.05 | 0.923893 | 0.981 |
| COL26A1   | 0.05 | 0.91565  | 0.979 |
| COL3A1    | 0.05 | 0.91565  | 0.979 |
| COPS4     | 0.05 | 0.91565  | 0.979 |
| CRYBA4    | 0.05 | 0.91565  | 0.979 |
| CTSO      | 0.05 | 0.91565  | 0.979 |
| CYP7B1    | 0.05 | 0.91565  | 0.979 |
| DGP2      | 0.05 | 0.91565  | 0.979 |
| DHX57     | 0.05 | 0.91565  | 0.979 |
| DIXDC1    | 0.05 | 0.919868 | 0.981 |
| DLG3      | 0.05 | 0.91565  | 0.979 |
| DYNC2H1   | 0.05 | 0.91565  | 0.979 |
| EID1      | 0.05 | 0.91565  | 0.979 |
| ENTPD3    | 0.05 | 0.91565  | 0.979 |
| EPGN      | 0.05 | 0.91565  | 0.979 |
| ERP29     | 0.05 | 0.91565  | 0.979 |
| FAM83F    | 0.05 | 0.91565  | 0.979 |
| FBXO6     | 0.05 | 0.91565  | 0.979 |
| FHOD1     | 0.05 | 0.91565  | 0.979 |
| GABRD     | 0.05 | 0.91565  | 0.979 |
| GAS2L2    | 0.05 | 0.91565  | 0.979 |
| GDF5      | 0.05 | 0.91565  | 0.979 |
| HELB      | 0.05 | 0.91565  | 0.979 |
| HIST2H2AB | 0.05 | 0.91565  | 0.979 |
| HKDC1     | 0.05 | 0.91565  | 0.979 |
| JMJD4     | 0.05 | 0.91565  | 0.979 |
| KIAA1549L | 0.05 | 0.919867 | 0.981 |
| LBH       | 0.05 | 0.91565  | 0.979 |
| LMF1      | 0.05 | 0.91565  | 0.979 |

|          |      |          |       |
|----------|------|----------|-------|
| LRRC27   | 0.05 | 0.91565  | 0.979 |
| LRTM2    | 0.05 | 0.91565  | 0.979 |
| MAP7D2   | 0.05 | 0.91565  | 0.979 |
| MGLL     | 0.05 | 0.91565  | 0.979 |
| MLEC     | 0.05 | 0.919868 | 0.981 |
| MMP19    | 0.05 | 0.919867 | 0.981 |
| MMP24    | 0.05 | 0.91565  | 0.979 |
| MTOR     | 0.05 | 0.919867 | 0.981 |
| NDUFAF7  | 0.05 | 0.91565  | 0.979 |
| NEK3     | 0.05 | 0.91565  | 0.979 |
| NEK9     | 0.05 | 0.91565  | 0.979 |
| NKAIN1   | 0.05 | 0.91565  | 0.979 |
| NR4A1    | 0.05 | 0.91565  | 0.979 |
| NTHL1    | 0.05 | 0.91565  | 0.979 |
| OR13C8   | 0.05 | 0.919867 | 0.981 |
| OR2F1    | 0.05 | 0.91565  | 0.979 |
| OR4C46   | 0.05 | 0.91565  | 0.979 |
| OR6M1    | 0.05 | 0.91565  | 0.979 |
| PAOX     | 0.05 | 0.91565  | 0.979 |
| PDC      | 0.05 | 0.91565  | 0.979 |
| PDE6A    | 0.05 | 0.91565  | 0.979 |
| PGBD2    | 0.05 | 0.91565  | 0.979 |
| PHKB     | 0.05 | 0.91565  | 0.979 |
| PHYHD1   | 0.05 | 0.91565  | 0.979 |
| PI15     | 0.05 | 0.91565  | 0.979 |
| PPP2R3C  | 0.05 | 0.91565  | 0.979 |
| PRDM10   | 0.05 | 0.919867 | 0.981 |
| PRMT6    | 0.05 | 0.91565  | 0.979 |
| PTGIR    | 0.05 | 0.91565  | 0.979 |
| RAB4B    | 0.05 | 0.91565  | 0.979 |
| RASGEF1C | 0.05 | 0.91565  | 0.979 |
| REG1B    | 0.05 | 0.91565  | 0.979 |
| RINT1    | 0.05 | 0.923893 | 0.981 |
| RNF186   | 0.05 | 0.919867 | 0.981 |
| S100A7   | 0.05 | 0.91565  | 0.979 |
| SIK1     | 0.05 | 0.91565  | 0.979 |
| SLC16A11 | 0.05 | 0.91565  | 0.979 |
| SLC16A8  | 0.05 | 0.91565  | 0.979 |
| SLC1A5   | 0.05 | 0.919867 | 0.981 |
| SMG1     | 0.05 | 0.91565  | 0.979 |
| SMIM11A  | 0.05 | 0.93946  | 0.983 |
| SMIM7    | 0.05 | 0.91565  | 0.979 |
| SNX22    | 0.05 | 0.91565  | 0.979 |
| STIL     | 0.05 | 0.919867 | 0.981 |
| STYK1    | 0.05 | 0.91565  | 0.979 |
| SUOX     | 0.05 | 0.91565  | 0.979 |
| TAF7     | 0.05 | 0.91565  | 0.979 |

|          |      |          |       |
|----------|------|----------|-------|
| TFEC     | 0.05 | 0.91565  | 0.979 |
| TH       | 0.05 | 0.91565  | 0.979 |
| TMEM235  | 0.05 | 0.91565  | 0.979 |
| TNP2     | 0.05 | 0.91565  | 0.979 |
| TOMM40   | 0.05 | 0.919867 | 0.981 |
| TPBG     | 0.05 | 0.923894 | 0.981 |
| TRIM37   | 0.05 | 0.91565  | 0.979 |
| TRIO     | 0.05 | 0.91565  | 0.979 |
| TTLL12   | 0.05 | 0.919867 | 0.981 |
| UGCG     | 0.05 | 0.91565  | 0.979 |
| VAV3     | 0.05 | 0.91565  | 0.979 |
| VEGFA    | 0.05 | 0.91565  | 0.979 |
| WRAP53   | 0.05 | 0.91565  | 0.979 |
| YARS2    | 0.05 | 0.919867 | 0.981 |
| ZMAT2    | 0.05 | 0.923893 | 0.981 |
| ZNF284   | 0.05 | 0.91565  | 0.979 |
| ZNF286A  | 0.05 | 0.91565  | 0.979 |
| ZNF486   | 0.05 | 0.919867 | 0.981 |
| ZNF559   | 0.05 | 0.91565  | 0.979 |
| ABL2     | 0.06 | 0.90162  | 0.977 |
| ACSS2    | 0.06 | 0.90162  | 0.977 |
| ADAD1    | 0.06 | 0.90162  | 0.977 |
| ADAP1    | 0.06 | 0.90162  | 0.977 |
| ADIPOR2  | 0.06 | 0.90162  | 0.977 |
| ANAPC1   | 0.06 | 0.90162  | 0.977 |
| ARPP19   | 0.06 | 0.90162  | 0.977 |
| ARSD     | 0.06 | 0.90162  | 0.977 |
| ASMTL    | 0.06 | 0.90162  | 0.977 |
| ATXN1L   | 0.06 | 0.906521 | 0.979 |
| AZGP1    | 0.06 | 0.90162  | 0.977 |
| B3GAT3   | 0.06 | 0.90162  | 0.977 |
| BHLHE40  | 0.06 | 0.906521 | 0.979 |
| C12orf39 | 0.06 | 0.90162  | 0.977 |
| C19orf53 | 0.06 | 0.90652  | 0.979 |
| C2orf48  | 0.06 | 0.90162  | 0.977 |
| C9orf96  | 0.06 | 0.90162  | 0.977 |
| CARD6    | 0.06 | 0.90162  | 0.977 |
| CCDC116  | 0.06 | 0.90652  | 0.979 |
| CCDC85B  | 0.06 | 0.90162  | 0.977 |
| CCNB2    | 0.06 | 0.90162  | 0.977 |
| CFAP74   | 0.06 | 0.90162  | 0.977 |
| CHEK2    | 0.06 | 0.90162  | 0.977 |
| CHMP3    | 0.06 | 0.90162  | 0.977 |
| CKAP2    | 0.06 | 0.90162  | 0.977 |
| CLCA2    | 0.06 | 0.90162  | 0.977 |
| CMPK2    | 0.06 | 0.90162  | 0.977 |
| COX7A2   | 0.06 | 0.90162  | 0.977 |

|           |      |          |       |
|-----------|------|----------|-------|
| CRYGB     | 0.06 | 0.90162  | 0.977 |
| CT45A5    | 0.06 | 0.90162  | 0.977 |
| CTNND1    | 0.06 | 0.90162  | 0.977 |
| CTU2      | 0.06 | 0.90162  | 0.977 |
| CYP2W1    | 0.06 | 0.90162  | 0.977 |
| DCTN4     | 0.06 | 0.906521 | 0.979 |
| DENND2C   | 0.06 | 0.906521 | 0.979 |
| DHRS11    | 0.06 | 0.90162  | 0.977 |
| DKK3      | 0.06 | 0.90162  | 0.977 |
| DNAJC22   | 0.06 | 0.90162  | 0.977 |
| DYDC1     | 0.06 | 0.906521 | 0.979 |
| EGLN2     | 0.06 | 0.90162  | 0.977 |
| EPHA5     | 0.06 | 0.90162  | 0.977 |
| ETV6      | 0.06 | 0.90162  | 0.977 |
| EVA1C     | 0.06 | 0.90162  | 0.977 |
| EVI5L     | 0.06 | 0.90162  | 0.977 |
| FAM126B   | 0.06 | 0.90162  | 0.977 |
| FAM187B   | 0.06 | 0.90162  | 0.977 |
| FBXO41    | 0.06 | 0.917186 | 0.98  |
| FKTN      | 0.06 | 0.90162  | 0.977 |
| GAS2      | 0.06 | 0.90162  | 0.977 |
| GPC1      | 0.06 | 0.90162  | 0.977 |
| GPN3      | 0.06 | 0.90162  | 0.977 |
| GPR25     | 0.06 | 0.90162  | 0.977 |
| GRHL3     | 0.06 | 0.90162  | 0.977 |
| GRIK4     | 0.06 | 0.906521 | 0.979 |
| HERC2     | 0.06 | 0.90162  | 0.977 |
| HIST1H3C  | 0.06 | 0.90162  | 0.977 |
| ID1       | 0.06 | 0.90162  | 0.977 |
| IFNL4     | 0.06 | 0.90162  | 0.977 |
| IGF1      | 0.06 | 0.90162  | 0.977 |
| INSL3     | 0.06 | 0.90162  | 0.977 |
| KCTD8     | 0.06 | 0.90162  | 0.977 |
| KIAA1456  | 0.06 | 0.90162  | 0.977 |
| KIF5A     | 0.06 | 0.90162  | 0.977 |
| KRTAP5-10 | 0.06 | 0.90652  | 0.979 |
| KRTCAP3   | 0.06 | 0.906521 | 0.979 |
| KTI12     | 0.06 | 0.90162  | 0.977 |
| LCE3E     | 0.06 | 0.906521 | 0.979 |
| LRP5      | 0.06 | 0.90162  | 0.977 |
| LTK       | 0.06 | 0.90162  | 0.977 |
| LY6E      | 0.06 | 0.90162  | 0.977 |
| MAF       | 0.06 | 0.90162  | 0.977 |
| MAPK12    | 0.06 | 0.90652  | 0.979 |
| MB        | 0.06 | 0.90162  | 0.977 |
| MBLAC2    | 0.06 | 0.90162  | 0.977 |
| MPPED1    | 0.06 | 0.90162  | 0.977 |

|            |      |          |       |
|------------|------|----------|-------|
| MRPL23     | 0.06 | 0.90162  | 0.977 |
| MTFR2      | 0.06 | 0.906521 | 0.979 |
| MTHFR      | 0.06 | 0.90162  | 0.977 |
| MYH7B      | 0.06 | 0.906521 | 0.979 |
| NBPF6      | 0.06 | 0.90162  | 0.977 |
| NDE1       | 0.06 | 0.90162  | 0.977 |
| NR2E1      | 0.06 | 0.906521 | 0.979 |
| NTS        | 0.06 | 0.90162  | 0.977 |
| NUDT6      | 0.06 | 0.90162  | 0.977 |
| OR4A47     | 0.06 | 0.90162  | 0.977 |
| PCK1       | 0.06 | 0.90162  | 0.977 |
| PHLDB2     | 0.06 | 0.90162  | 0.977 |
| PKLR       | 0.06 | 0.90162  | 0.977 |
| PLD4       | 0.06 | 0.90162  | 0.977 |
| PMEL       | 0.06 | 0.906521 | 0.979 |
| POLR1C     | 0.06 | 0.911344 | 0.979 |
| PRDM6      | 0.06 | 0.90162  | 0.977 |
| PROSC      | 0.06 | 0.90162  | 0.977 |
| PTCRA      | 0.06 | 0.90162  | 0.977 |
| S1PR1      | 0.06 | 0.90162  | 0.977 |
| SAP25      | 0.06 | 0.90162  | 0.977 |
| SCIMP      | 0.06 | 0.90652  | 0.979 |
| SECISBP2   | 0.06 | 0.90652  | 0.979 |
| SIGLECL1   | 0.06 | 0.90162  | 0.977 |
| SLAIN2     | 0.06 | 0.90162  | 0.977 |
| SLC25A3    | 0.06 | 0.90162  | 0.977 |
| SLC25A39   | 0.06 | 0.90162  | 0.977 |
| SLC34A1    | 0.06 | 0.90162  | 0.977 |
| SMCO2      | 0.06 | 0.90162  | 0.977 |
| SORBS1     | 0.06 | 0.90162  | 0.977 |
| ST6GALNAC  | 0.06 | 0.90162  | 0.977 |
| STON1-GTF  | 0.06 | 0.90162  | 0.977 |
| STRA13     | 0.06 | 0.90162  | 0.977 |
| SUSD2      | 0.06 | 0.90162  | 0.977 |
| SV2B       | 0.06 | 0.906521 | 0.979 |
| TGFB2      | 0.06 | 0.90162  | 0.977 |
| TIRAP      | 0.06 | 0.90162  | 0.977 |
| TOP1       | 0.06 | 0.906521 | 0.979 |
| TRA2A      | 0.06 | 0.90162  | 0.977 |
| TRIAP1     | 0.06 | 0.906521 | 0.979 |
| TRIM24     | 0.06 | 0.90652  | 0.979 |
| TRIM6-TRIM | 0.06 | 0.90162  | 0.977 |
| TRPV5      | 0.06 | 0.906521 | 0.979 |
| TSPAN11    | 0.06 | 0.90162  | 0.977 |
| TUBB2B     | 0.06 | 0.90162  | 0.977 |
| UBN1       | 0.06 | 0.90162  | 0.977 |
| UBXN2B     | 0.06 | 0.90162  | 0.977 |

|          |      |          |       |
|----------|------|----------|-------|
| XRCC1    | 0.06 | 0.90162  | 0.977 |
| ZNF154   | 0.06 | 0.90162  | 0.977 |
| ZNF671   | 0.06 | 0.90162  | 0.977 |
| ABHD12B  | 0.07 | 0.887674 | 0.976 |
| ACBD4    | 0.07 | 0.887674 | 0.976 |
| ACOXL    | 0.07 | 0.887673 | 0.976 |
| AEBP2    | 0.07 | 0.887673 | 0.976 |
| ANKZF1   | 0.07 | 0.887673 | 0.976 |
| ANP32D   | 0.07 | 0.887674 | 0.976 |
| ARL14EPL | 0.07 | 0.887674 | 0.976 |
| ARMC4    | 0.07 | 0.887674 | 0.976 |
| ASB9     | 0.07 | 0.887673 | 0.976 |
| AURKB    | 0.07 | 0.911989 | 0.979 |
| AVL9     | 0.07 | 0.887673 | 0.976 |
| BFSP2    | 0.07 | 0.887674 | 0.976 |
| BVES     | 0.07 | 0.887673 | 0.976 |
| C22orf23 | 0.07 | 0.898739 | 0.977 |
| CACNG2   | 0.07 | 0.887673 | 0.976 |
| CALML6   | 0.07 | 0.887673 | 0.976 |
| CAPZA1   | 0.07 | 0.887674 | 0.976 |
| CASC10   | 0.07 | 0.887673 | 0.976 |
| CASP10   | 0.07 | 0.887673 | 0.976 |
| CCDC59   | 0.07 | 0.887673 | 0.976 |
| CHAC1    | 0.07 | 0.89322  | 0.977 |
| CLDN14   | 0.07 | 0.887673 | 0.976 |
| CNPY4    | 0.07 | 0.887673 | 0.976 |
| COX19    | 0.07 | 0.887673 | 0.976 |
| CP       | 0.07 | 0.887673 | 0.976 |
| CPLX2    | 0.07 | 0.89322  | 0.977 |
| CR1L     | 0.07 | 0.887673 | 0.976 |
| CRYAB    | 0.07 | 0.90546  | 0.979 |
| CTAGE6   | 0.07 | 0.887673 | 0.976 |
| DEFB135  | 0.07 | 0.89322  | 0.977 |
| DNAH6    | 0.07 | 0.887673 | 0.976 |
| DPH7     | 0.07 | 0.887673 | 0.976 |
| DUSP19   | 0.07 | 0.887673 | 0.976 |
| DUSP3    | 0.07 | 0.887673 | 0.976 |
| EFCAB3   | 0.07 | 0.893221 | 0.977 |
| EPHA1    | 0.07 | 0.887673 | 0.976 |
| ETV2     | 0.07 | 0.887673 | 0.976 |
| EXOGL    | 0.07 | 0.89322  | 0.977 |
| FAIM3    | 0.07 | 0.887674 | 0.976 |
| FAM127A  | 0.07 | 0.887673 | 0.976 |
| FAM203A  | 0.07 | 0.887673 | 0.976 |
| FANCM    | 0.07 | 0.89322  | 0.977 |
| FSTL1    | 0.07 | 0.887674 | 0.976 |
| FUT10    | 0.07 | 0.887673 | 0.976 |

|          |      |          |       |
|----------|------|----------|-------|
| GAPDHS   | 0.07 | 0.89322  | 0.977 |
| GDF10    | 0.07 | 0.887673 | 0.976 |
| GDPD3    | 0.07 | 0.887673 | 0.976 |
| GLP1R    | 0.07 | 0.887673 | 0.976 |
| GTF2E2   | 0.07 | 0.887673 | 0.976 |
| HINFP    | 0.07 | 0.89322  | 0.977 |
| HK3      | 0.07 | 0.887674 | 0.976 |
| HOOK1    | 0.07 | 0.887674 | 0.976 |
| IFIT1B   | 0.07 | 0.887673 | 0.976 |
| IFNG     | 0.07 | 0.887673 | 0.976 |
| IGDCC4   | 0.07 | 0.887673 | 0.976 |
| IL24     | 0.07 | 0.887674 | 0.976 |
| ING1     | 0.07 | 0.887673 | 0.976 |
| INTS7    | 0.07 | 0.887673 | 0.976 |
| KCNAB3   | 0.07 | 0.887673 | 0.976 |
| KIAA1919 | 0.07 | 0.887673 | 0.976 |
| KIF5C    | 0.07 | 0.887673 | 0.976 |
| KLHL15   | 0.07 | 0.887673 | 0.976 |
| KNOP1    | 0.07 | 0.887673 | 0.976 |
| LCP1     | 0.07 | 0.89322  | 0.977 |
| LEMD1    | 0.07 | 0.887673 | 0.976 |
| LIMS3    | 0.07 | 0.887673 | 0.976 |
| LOR      | 0.07 | 0.887673 | 0.976 |
| LPAR6    | 0.07 | 0.887673 | 0.976 |
| LPIN1    | 0.07 | 0.887673 | 0.976 |
| LRP5L    | 0.07 | 0.887673 | 0.976 |
| LRRC47   | 0.07 | 0.887673 | 0.976 |
| LSG1     | 0.07 | 0.893221 | 0.977 |
| LSM7     | 0.07 | 0.887673 | 0.976 |
| LTBP3    | 0.07 | 0.887673 | 0.976 |
| MAPKBP1  | 0.07 | 0.887673 | 0.976 |
| MLH1     | 0.07 | 0.887673 | 0.976 |
| MLYCD    | 0.07 | 0.887673 | 0.976 |
| MMS19    | 0.07 | 0.887673 | 0.976 |
| MS4A2    | 0.07 | 0.887673 | 0.976 |
| MSH3     | 0.07 | 0.887673 | 0.976 |
| MT2A     | 0.07 | 0.887674 | 0.976 |
| MTMR10   | 0.07 | 0.887673 | 0.976 |
| MYT1L    | 0.07 | 0.893221 | 0.977 |
| NOL6     | 0.07 | 0.898738 | 0.977 |
| NPPB     | 0.07 | 0.887673 | 0.976 |
| NPTN     | 0.07 | 0.887673 | 0.976 |
| OR10H3   | 0.07 | 0.887673 | 0.976 |
| OR1M1    | 0.07 | 0.887673 | 0.976 |
| PCCA     | 0.07 | 0.89322  | 0.977 |
| PCLO     | 0.07 | 0.89322  | 0.977 |
| PDE10A   | 0.07 | 0.89322  | 0.977 |

|          |      |          |       |
|----------|------|----------|-------|
| PFAS     | 0.07 | 0.898739 | 0.977 |
| PIK3R2   | 0.07 | 0.887673 | 0.976 |
| PIK3R5   | 0.07 | 0.89322  | 0.977 |
| PLEKHA1  | 0.07 | 0.893221 | 0.977 |
| POU4F3   | 0.07 | 0.887674 | 0.976 |
| PPP1R3A  | 0.07 | 0.893221 | 0.977 |
| PRB1     | 0.07 | 0.887673 | 0.976 |
| PRKAR1B  | 0.07 | 0.887673 | 0.976 |
| PRND     | 0.07 | 0.887674 | 0.976 |
| PRPS2    | 0.07 | 0.89322  | 0.977 |
| PRR23B   | 0.07 | 0.887674 | 0.976 |
| PTP4A3   | 0.07 | 0.887674 | 0.976 |
| RASL11A  | 0.07 | 0.887673 | 0.976 |
| RBPJL    | 0.07 | 0.887673 | 0.976 |
| REEP4    | 0.07 | 0.887673 | 0.976 |
| RFWD3    | 0.07 | 0.887673 | 0.976 |
| RNF151   | 0.07 | 0.887673 | 0.976 |
| RRP12    | 0.07 | 0.887673 | 0.976 |
| SDAD1    | 0.07 | 0.89322  | 0.977 |
| SESN1    | 0.07 | 0.887673 | 0.976 |
| SH3GLB2  | 0.07 | 0.887673 | 0.976 |
| SHANK3   | 0.07 | 0.887673 | 0.976 |
| SLCO1B1  | 0.07 | 0.887673 | 0.976 |
| SLCO1B3  | 0.07 | 0.887673 | 0.976 |
| SPON1    | 0.07 | 0.887673 | 0.976 |
| SPPL2A   | 0.07 | 0.887674 | 0.976 |
| SYNDIG1L | 0.07 | 0.887673 | 0.976 |
| TACC2    | 0.07 | 0.887673 | 0.976 |
| TDRD12   | 0.07 | 0.887673 | 0.976 |
| TEAD1    | 0.07 | 0.887673 | 0.976 |
| TEX22    | 0.07 | 0.887673 | 0.976 |
| TIGD1    | 0.07 | 0.887673 | 0.976 |
| TMEM116  | 0.07 | 0.887673 | 0.976 |
| TRIM2    | 0.07 | 0.887673 | 0.976 |
| TSKS     | 0.07 | 0.89322  | 0.977 |
| UCHL1    | 0.07 | 0.887673 | 0.976 |
| UGT2A1   | 0.07 | 0.887673 | 0.976 |
| UNCX     | 0.07 | 0.887673 | 0.976 |
| VANGL1   | 0.07 | 0.887673 | 0.976 |
| YWHAQ    | 0.07 | 0.89322  | 0.977 |
| ZBTB25   | 0.07 | 0.887673 | 0.976 |
| ZBTB38   | 0.07 | 0.887673 | 0.976 |
| ZBTB9    | 0.07 | 0.89322  | 0.977 |
| ZER1     | 0.07 | 0.887673 | 0.976 |
| ZNF605   | 0.07 | 0.887673 | 0.976 |
| ZNF672   | 0.07 | 0.887673 | 0.976 |
| ZNF678   | 0.07 | 0.89322  | 0.977 |

|            |      |          |       |
|------------|------|----------|-------|
| ZNF765     | 0.07 | 0.887673 | 0.976 |
| ABT1       | 0.08 | 0.873738 | 0.975 |
| ACSM5      | 0.08 | 0.873739 | 0.975 |
| ACTR6      | 0.08 | 0.873738 | 0.975 |
| ADAMTSL4   | 0.08 | 0.879983 | 0.976 |
| ADH5       | 0.08 | 0.873738 | 0.975 |
| ALG11      | 0.08 | 0.873738 | 0.975 |
| ALS2CR11   | 0.08 | 0.873738 | 0.975 |
| APITD1-COF | 0.08 | 0.873738 | 0.975 |
| ATP5C1     | 0.08 | 0.873738 | 0.975 |
| ATP6V0D1   | 0.08 | 0.879983 | 0.976 |
| BRD7       | 0.08 | 0.873738 | 0.975 |
| C10orf111  | 0.08 | 0.873738 | 0.975 |
| C10orf129  | 0.08 | 0.873738 | 0.975 |
| C1orf167   | 0.08 | 0.873738 | 0.975 |
| C1orf54    | 0.08 | 0.873739 | 0.975 |
| C2CD2      | 0.08 | 0.873738 | 0.975 |
| C9orf9     | 0.08 | 0.873738 | 0.975 |
| CACNA1B    | 0.08 | 0.873738 | 0.975 |
| CCDC19     | 0.08 | 0.879983 | 0.976 |
| CCL19      | 0.08 | 0.879983 | 0.976 |
| CCNC       | 0.08 | 0.873738 | 0.975 |
| CD151      | 0.08 | 0.873739 | 0.975 |
| CD5L       | 0.08 | 0.873738 | 0.975 |
| CDKL4      | 0.08 | 0.873739 | 0.975 |
| CEP250     | 0.08 | 0.879983 | 0.976 |
| CERS1      | 0.08 | 0.873738 | 0.975 |
| CGB2       | 0.08 | 0.873738 | 0.975 |
| CHI3L2     | 0.08 | 0.873738 | 0.975 |
| CNTLN      | 0.08 | 0.873738 | 0.975 |
| COL4A2     | 0.08 | 0.886246 | 0.976 |
| CYB5D2     | 0.08 | 0.873738 | 0.975 |
| CYHR1      | 0.08 | 0.873738 | 0.975 |
| CYTIP      | 0.08 | 0.873739 | 0.975 |
| DACH2      | 0.08 | 0.873738 | 0.975 |
| DEFB129    | 0.08 | 0.879983 | 0.976 |
| DENND6A    | 0.08 | 0.879983 | 0.976 |
| DLX5       | 0.08 | 0.873738 | 0.975 |
| DMRT2      | 0.08 | 0.873738 | 0.975 |
| DYNC111    | 0.08 | 0.873738 | 0.975 |
| DYNLL1     | 0.08 | 0.873738 | 0.975 |
| EDIL3      | 0.08 | 0.873739 | 0.975 |
| ELP6       | 0.08 | 0.873739 | 0.975 |
| ERI3       | 0.08 | 0.879983 | 0.976 |
| ERMARD     | 0.08 | 0.873738 | 0.975 |
| FAM110A    | 0.08 | 0.873739 | 0.975 |
| FAM110D    | 0.08 | 0.873738 | 0.975 |

|         |      |          |       |
|---------|------|----------|-------|
| FCN2    | 0.08 | 0.873739 | 0.975 |
| FDXACB1 | 0.08 | 0.873738 | 0.975 |
| FES     | 0.08 | 0.873738 | 0.975 |
| FOXN1   | 0.08 | 0.879983 | 0.976 |
| GFM1    | 0.08 | 0.879983 | 0.976 |
| GPATCH2 | 0.08 | 0.879984 | 0.976 |
| GPNMB   | 0.08 | 0.873738 | 0.975 |
| GPR88   | 0.08 | 0.879983 | 0.976 |
| GRK4    | 0.08 | 0.873739 | 0.975 |
| GRXCR1  | 0.08 | 0.873739 | 0.975 |
| GSC2    | 0.08 | 0.873738 | 0.975 |
| HRAS    | 0.08 | 0.873738 | 0.975 |
| HSD17B8 | 0.08 | 0.873739 | 0.975 |
| IFNB1   | 0.08 | 0.873738 | 0.975 |
| IL21    | 0.08 | 0.873738 | 0.975 |
| IQCF3   | 0.08 | 0.873738 | 0.975 |
| ITGAM   | 0.08 | 0.873738 | 0.975 |
| KATNBL1 | 0.08 | 0.873738 | 0.975 |
| KCNG1   | 0.08 | 0.873739 | 0.975 |
| KRT8    | 0.08 | 0.873738 | 0.975 |
| LSP1    | 0.08 | 0.873738 | 0.975 |
| MDGA2   | 0.08 | 0.873739 | 0.975 |
| MIA     | 0.08 | 0.873738 | 0.975 |
| NANOGNB | 0.08 | 0.879983 | 0.976 |
| NARG2   | 0.08 | 0.873738 | 0.975 |
| NCBP2   | 0.08 | 0.873738 | 0.975 |
| NEK11   | 0.08 | 0.873738 | 0.975 |
| NFYB    | 0.08 | 0.873738 | 0.975 |
| NLRP11  | 0.08 | 0.873738 | 0.975 |
| NLRP12  | 0.08 | 0.873738 | 0.975 |
| NME3    | 0.08 | 0.873738 | 0.975 |
| NOL10   | 0.08 | 0.879983 | 0.976 |
| NPBWR1  | 0.08 | 0.873739 | 0.975 |
| NRBP2   | 0.08 | 0.873738 | 0.975 |
| NUTM2B  | 0.08 | 0.873738 | 0.975 |
| OBFC1   | 0.08 | 0.873738 | 0.975 |
| OR10A4  | 0.08 | 0.873739 | 0.975 |
| OR2H2   | 0.08 | 0.873738 | 0.975 |
| PAAF1   | 0.08 | 0.873738 | 0.975 |
| PCP4    | 0.08 | 0.873738 | 0.975 |
| PDE1A   | 0.08 | 0.873738 | 0.975 |
| PHC1    | 0.08 | 0.873738 | 0.975 |
| PINK1   | 0.08 | 0.873739 | 0.975 |
| PKN2    | 0.08 | 0.879984 | 0.976 |
| PLEKHG3 | 0.08 | 0.873738 | 0.975 |
| PLK3    | 0.08 | 0.873739 | 0.975 |
| PLK5    | 0.08 | 0.873739 | 0.975 |

|          |      |          |       |
|----------|------|----------|-------|
| PPOX     | 0.08 | 0.873738 | 0.975 |
| PTGDS    | 0.08 | 0.873738 | 0.975 |
| PTPN20A  | 0.08 | 0.879983 | 0.976 |
| PTPN20B  | 0.08 | 0.879984 | 0.976 |
| PTPN4    | 0.08 | 0.873738 | 0.975 |
| RARG     | 0.08 | 0.873738 | 0.975 |
| RASEF    | 0.08 | 0.873738 | 0.975 |
| RAVER2   | 0.08 | 0.873738 | 0.975 |
| RHBDL2   | 0.08 | 0.873738 | 0.975 |
| RWDD3    | 0.08 | 0.873738 | 0.975 |
| SDK2     | 0.08 | 0.879984 | 0.976 |
| SHANK1   | 0.08 | 0.873738 | 0.975 |
| SLC26A6  | 0.08 | 0.873738 | 0.975 |
| SLC39A6  | 0.08 | 0.873738 | 0.975 |
| SNW1     | 0.08 | 0.873738 | 0.975 |
| SP7      | 0.08 | 0.879984 | 0.976 |
| SPSB3    | 0.08 | 0.873738 | 0.975 |
| TACR3    | 0.08 | 0.873738 | 0.975 |
| TAS1R3   | 0.08 | 0.886246 | 0.976 |
| TGFBR3L  | 0.08 | 0.873738 | 0.975 |
| THRB     | 0.08 | 0.873738 | 0.975 |
| TMCC2    | 0.08 | 0.873738 | 0.975 |
| TMEM132B | 0.08 | 0.873739 | 0.975 |
| TMEM205  | 0.08 | 0.873738 | 0.975 |
| TMEM95   | 0.08 | 0.873738 | 0.975 |
| TNNT2    | 0.08 | 0.886246 | 0.976 |
| TTK      | 0.08 | 0.873738 | 0.975 |
| USP54    | 0.08 | 0.873738 | 0.975 |
| VWA3A    | 0.08 | 0.879983 | 0.976 |
| WNT2B    | 0.08 | 0.873738 | 0.975 |
| WRNIP1   | 0.08 | 0.873739 | 0.975 |
| ZNF550   | 0.08 | 0.873739 | 0.975 |
| ZNF681   | 0.08 | 0.886246 | 0.976 |
| ZNF768   | 0.08 | 0.873738 | 0.975 |
| ZNF831   | 0.08 | 0.879983 | 0.976 |
| ADRA2A   | 0.09 | 0.859823 | 0.974 |
| ADSS     | 0.09 | 0.881923 | 0.976 |
| AGFG2    | 0.09 | 0.866688 | 0.975 |
| AKAP2    | 0.09 | 0.859823 | 0.974 |
| AP4S1    | 0.09 | 0.859822 | 0.974 |
| ARSB     | 0.09 | 0.866689 | 0.975 |
| BBS1     | 0.09 | 0.859823 | 0.974 |
| BCL3     | 0.09 | 0.859822 | 0.974 |
| BEST1    | 0.09 | 0.859823 | 0.974 |
| C2CD4B   | 0.09 | 0.859823 | 0.974 |
| CDC40    | 0.09 | 0.859823 | 0.974 |
| CDH12    | 0.09 | 0.859822 | 0.974 |

|           |      |          |       |
|-----------|------|----------|-------|
| CDR2      | 0.09 | 0.859822 | 0.974 |
| CHST13    | 0.09 | 0.859823 | 0.974 |
| CLEC18A   | 0.09 | 0.859822 | 0.974 |
| CNTNAP3   | 0.09 | 0.859822 | 0.974 |
| COL12A1   | 0.09 | 0.859823 | 0.974 |
| CPB2      | 0.09 | 0.859823 | 0.974 |
| CPXCR1    | 0.09 | 0.859823 | 0.974 |
| CRHR1     | 0.09 | 0.866689 | 0.975 |
| CS        | 0.09 | 0.859822 | 0.974 |
| CST7      | 0.09 | 0.859823 | 0.974 |
| DCX       | 0.09 | 0.859823 | 0.974 |
| DDT       | 0.09 | 0.859823 | 0.974 |
| DDX52     | 0.09 | 0.859823 | 0.974 |
| ELL2      | 0.09 | 0.859823 | 0.974 |
| EYA4      | 0.09 | 0.859822 | 0.974 |
| FAM168B   | 0.09 | 0.866688 | 0.975 |
| FAM195A   | 0.09 | 0.859822 | 0.974 |
| FAM25G    | 0.09 | 0.859822 | 0.974 |
| FCHO1     | 0.09 | 0.859823 | 0.974 |
| FOXD4L3   | 0.09 | 0.859823 | 0.974 |
| GMPR2     | 0.09 | 0.859823 | 0.974 |
| GNB1      | 0.09 | 0.859823 | 0.974 |
| GOLPH3    | 0.09 | 0.866688 | 0.975 |
| GPD1L     | 0.09 | 0.859822 | 0.974 |
| HADHB     | 0.09 | 0.859822 | 0.974 |
| HDDC3     | 0.09 | 0.859823 | 0.974 |
| HIP1      | 0.09 | 0.859823 | 0.974 |
| HIST1H4I  | 0.09 | 0.859822 | 0.974 |
| HIST2H4A  | 0.09 | 0.859823 | 0.974 |
| HIST2H4B  | 0.09 | 0.859822 | 0.974 |
| HPGDS     | 0.09 | 0.859823 | 0.974 |
| HSF5      | 0.09 | 0.866688 | 0.975 |
| IFI35     | 0.09 | 0.859823 | 0.974 |
| IFNA17    | 0.09 | 0.859822 | 0.974 |
| IGLON5    | 0.09 | 0.859823 | 0.974 |
| ISG20     | 0.09 | 0.859823 | 0.974 |
| ISL2      | 0.09 | 0.859822 | 0.974 |
| ISYNA1    | 0.09 | 0.866688 | 0.975 |
| KCNJ15    | 0.09 | 0.866689 | 0.975 |
| KDR       | 0.09 | 0.859822 | 0.974 |
| KIAA0040  | 0.09 | 0.859823 | 0.974 |
| KIAA2012  | 0.09 | 0.859822 | 0.974 |
| KLK4      | 0.09 | 0.859823 | 0.974 |
| KRBOX4    | 0.09 | 0.859823 | 0.974 |
| KRTAP13-1 | 0.09 | 0.859823 | 0.974 |
| LCLAT1    | 0.09 | 0.859823 | 0.974 |
| LMAN2     | 0.09 | 0.859823 | 0.974 |

|          |      |          |       |
|----------|------|----------|-------|
| LRRC72   | 0.09 | 0.859823 | 0.974 |
| LRRCC1   | 0.09 | 0.859823 | 0.974 |
| MED14    | 0.09 | 0.866689 | 0.975 |
| METTL11B | 0.09 | 0.859822 | 0.974 |
| MFN2     | 0.09 | 0.859822 | 0.974 |
| MRPL47   | 0.09 | 0.866688 | 0.975 |
| MS4A8    | 0.09 | 0.859823 | 0.974 |
| MSANTD4  | 0.09 | 0.859823 | 0.974 |
| MTFMT    | 0.09 | 0.866688 | 0.975 |
| NANOS3   | 0.09 | 0.859822 | 0.974 |
| NLRP6    | 0.09 | 0.859823 | 0.974 |
| NT5C     | 0.09 | 0.859822 | 0.974 |
| OR2A12   | 0.09 | 0.859823 | 0.974 |
| OR52M1   | 0.09 | 0.859823 | 0.974 |
| OR8B3    | 0.09 | 0.859823 | 0.974 |
| OR9I1    | 0.09 | 0.859822 | 0.974 |
| OXTR     | 0.09 | 0.859823 | 0.974 |
| PARPBP   | 0.09 | 0.859823 | 0.974 |
| PLIN3    | 0.09 | 0.859822 | 0.974 |
| PRIM1    | 0.09 | 0.908966 | 0.979 |
| PRKCI    | 0.09 | 0.859823 | 0.974 |
| PROK1    | 0.09 | 0.859823 | 0.974 |
| PROSER2  | 0.09 | 0.859822 | 0.974 |
| PRSS58   | 0.09 | 0.859823 | 0.974 |
| PSMG1    | 0.09 | 0.859822 | 0.974 |
| PVRL1    | 0.09 | 0.859822 | 0.974 |
| RAD17    | 0.09 | 0.859822 | 0.974 |
| RBBP5    | 0.09 | 0.859822 | 0.974 |
| REXO1    | 0.09 | 0.859823 | 0.974 |
| RHBG     | 0.09 | 0.859823 | 0.974 |
| RIMS3    | 0.09 | 0.859822 | 0.974 |
| RNF166   | 0.09 | 0.859822 | 0.974 |
| RPL14    | 0.09 | 0.873709 | 0.975 |
| RPL31    | 0.09 | 0.859822 | 0.974 |
| RUFY2    | 0.09 | 0.859822 | 0.974 |
| RUFY4    | 0.09 | 0.873709 | 0.975 |
| S1PR3    | 0.09 | 0.859823 | 0.974 |
| SCARF1   | 0.09 | 0.859823 | 0.974 |
| SGK1     | 0.09 | 0.859822 | 0.974 |
| SLC30A7  | 0.09 | 0.866689 | 0.975 |
| SLC35G2  | 0.09 | 0.859822 | 0.974 |
| SLCO1C1  | 0.09 | 0.859823 | 0.974 |
| SMOX     | 0.09 | 0.859823 | 0.974 |
| SOCS4    | 0.09 | 0.859822 | 0.974 |
| SORBS2   | 0.09 | 0.859822 | 0.974 |
| SPATC1   | 0.09 | 0.866688 | 0.975 |
| SSPO     | 0.09 | 0.859822 | 0.974 |

|          |      |          |       |
|----------|------|----------|-------|
| STAC     | 0.09 | 0.859822 | 0.974 |
| TARM1    | 0.09 | 0.859823 | 0.974 |
| TIMP4    | 0.09 | 0.859822 | 0.974 |
| TK2      | 0.09 | 0.866688 | 0.975 |
| TMEM115  | 0.09 | 0.859823 | 0.974 |
| TMEM220  | 0.09 | 0.859823 | 0.974 |
| TMEM97   | 0.09 | 0.859823 | 0.974 |
| TMPRSS7  | 0.09 | 0.859822 | 0.974 |
| TP53AIP1 | 0.09 | 0.859822 | 0.974 |
| TREM2    | 0.09 | 0.859823 | 0.974 |
| TRPC1    | 0.09 | 0.873708 | 0.975 |
| TYR      | 0.09 | 0.859823 | 0.974 |
| ULBP2    | 0.09 | 0.859822 | 0.974 |
| UQCRFS1  | 0.09 | 0.859822 | 0.974 |
| VWA1     | 0.09 | 0.859822 | 0.974 |
| VWA7     | 0.09 | 0.866688 | 0.975 |
| YBX1     | 0.09 | 0.859822 | 0.974 |
| YBX2     | 0.09 | 0.859823 | 0.974 |
| YOD1     | 0.09 | 0.866689 | 0.975 |
| ZACN     | 0.09 | 0.866688 | 0.975 |
| ZKSCAN1  | 0.09 | 0.866689 | 0.975 |
| ZNF266   | 0.09 | 0.859823 | 0.974 |
| ZNF446   | 0.09 | 0.859822 | 0.974 |
| ZNF460   | 0.09 | 0.859823 | 0.974 |
| ABCC11   | 0.1  | 0.845936 | 0.974 |
| ABI1     | 0.1  | 0.845936 | 0.974 |
| ACE2     | 0.1  | 0.845936 | 0.974 |
| ACPL2    | 0.1  | 0.845936 | 0.974 |
| ACTN3    | 0.1  | 0.845936 | 0.974 |
| ACTR3B   | 0.1  | 0.845936 | 0.974 |
| ADSSL1   | 0.1  | 0.845935 | 0.974 |
| ALDH3A2  | 0.1  | 0.845935 | 0.974 |
| ALDH6A1  | 0.1  | 0.845936 | 0.974 |
| ANKRD29  | 0.1  | 0.845936 | 0.974 |
| AP2S1    | 0.1  | 0.845936 | 0.974 |
| APTX     | 0.1  | 0.845936 | 0.974 |
| ARF1     | 0.1  | 0.845936 | 0.974 |
| ASPH     | 0.1  | 0.845936 | 0.974 |
| ATP1B3   | 0.1  | 0.845936 | 0.974 |
| BCORL1   | 0.1  | 0.845935 | 0.974 |
| BNIP1    | 0.1  | 0.845936 | 0.974 |
| BPIFA2   | 0.1  | 0.845936 | 0.974 |
| BRIP1    | 0.1  | 0.845936 | 0.974 |
| C1orf105 | 0.1  | 0.845936 | 0.974 |
| C1orf86  | 0.1  | 0.845936 | 0.974 |
| C6orf195 | 0.1  | 0.845936 | 0.974 |
| C7orf31  | 0.1  | 0.845936 | 0.974 |

|            |     |          |       |
|------------|-----|----------|-------|
| CBX8       | 0.1 | 0.845936 | 0.974 |
| CC2D2B     | 0.1 | 0.845936 | 0.974 |
| CCND1      | 0.1 | 0.845936 | 0.974 |
| CCNK       | 0.1 | 0.845936 | 0.974 |
| CDHR3      | 0.1 | 0.845936 | 0.974 |
| CELSR3     | 0.1 | 0.845936 | 0.974 |
| CISD1      | 0.1 | 0.845935 | 0.974 |
| CLDN10     | 0.1 | 0.845936 | 0.974 |
| CLN8       | 0.1 | 0.845936 | 0.974 |
| COL17A1    | 0.1 | 0.853508 | 0.974 |
| COL23A1    | 0.1 | 0.853508 | 0.974 |
| COX17      | 0.1 | 0.86126  | 0.975 |
| CRB2       | 0.1 | 0.86126  | 0.975 |
| DCUN1D5    | 0.1 | 0.845936 | 0.974 |
| DDX58      | 0.1 | 0.845935 | 0.974 |
| DIP2A      | 0.1 | 0.853509 | 0.974 |
| DLK2       | 0.1 | 0.845936 | 0.974 |
| DLL1       | 0.1 | 0.845936 | 0.974 |
| DOK6       | 0.1 | 0.845935 | 0.974 |
| DPP8       | 0.1 | 0.853509 | 0.974 |
| DPY19L4    | 0.1 | 0.845936 | 0.974 |
| EHD1       | 0.1 | 0.845936 | 0.974 |
| EXOSC7     | 0.1 | 0.870111 | 0.975 |
| FAM133B    | 0.1 | 0.845936 | 0.974 |
| FAM163A    | 0.1 | 0.845935 | 0.974 |
| FAM169B    | 0.1 | 0.845936 | 0.974 |
| FGL1       | 0.1 | 0.845935 | 0.974 |
| FLAD1      | 0.1 | 0.853508 | 0.974 |
| FMNL1      | 0.1 | 0.853508 | 0.974 |
| FOXJ2      | 0.1 | 0.845936 | 0.974 |
| FRMD4B     | 0.1 | 0.845936 | 0.974 |
| FXYP6-FXYI | 0.1 | 0.845936 | 0.974 |
| GABRA6     | 0.1 | 0.845936 | 0.974 |
| GDAP2      | 0.1 | 0.845935 | 0.974 |
| GLCCI1     | 0.1 | 0.845935 | 0.974 |
| GNPDA2     | 0.1 | 0.845935 | 0.974 |
| GPR97      | 0.1 | 0.853508 | 0.974 |
| HDAC7      | 0.1 | 0.845936 | 0.974 |
| HDGFL1     | 0.1 | 0.845936 | 0.974 |
| HMG20A     | 0.1 | 0.845936 | 0.974 |
| HR         | 0.1 | 0.845936 | 0.974 |
| IARS2      | 0.1 | 0.853509 | 0.974 |
| IL15       | 0.1 | 0.853508 | 0.974 |
| IL2RG      | 0.1 | 0.845936 | 0.974 |
| IRGC       | 0.1 | 0.845936 | 0.974 |
| KANSL2     | 0.1 | 0.845935 | 0.974 |
| KCNK5      | 0.1 | 0.845935 | 0.974 |

|          |     |          |       |
|----------|-----|----------|-------|
| KIAA1551 | 0.1 | 0.845936 | 0.974 |
| KIAA1683 | 0.1 | 0.845936 | 0.974 |
| LGR6     | 0.1 | 0.853509 | 0.974 |
| LIN7A    | 0.1 | 0.845935 | 0.974 |
| MAB21L1  | 0.1 | 0.845936 | 0.974 |
| MCRS1    | 0.1 | 0.845936 | 0.974 |
| MDM2     | 0.1 | 0.861261 | 0.975 |
| METAP1D  | 0.1 | 0.845936 | 0.974 |
| MLN      | 0.1 | 0.845936 | 0.974 |
| MMP13    | 0.1 | 0.845936 | 0.974 |
| MRPL2    | 0.1 | 0.845936 | 0.974 |
| MST1L    | 0.1 | 0.853509 | 0.974 |
| MYH6     | 0.1 | 0.845935 | 0.974 |
| NBPF9    | 0.1 | 0.845935 | 0.974 |
| NCK1     | 0.1 | 0.845936 | 0.974 |
| NEB      | 0.1 | 0.853509 | 0.974 |
| NFKBID   | 0.1 | 0.845936 | 0.974 |
| NFKBIE   | 0.1 | 0.845936 | 0.974 |
| NLGN3    | 0.1 | 0.845935 | 0.974 |
| NPTX2    | 0.1 | 0.845936 | 0.974 |
| NTSR1    | 0.1 | 0.845936 | 0.974 |
| OCA2     | 0.1 | 0.845936 | 0.974 |
| OR3A2    | 0.1 | 0.845936 | 0.974 |
| OR52B2   | 0.1 | 0.845936 | 0.974 |
| P2RY6    | 0.1 | 0.845936 | 0.974 |
| PCDHB4   | 0.1 | 0.845936 | 0.974 |
| PDCD1    | 0.1 | 0.853508 | 0.974 |
| PGPEP1   | 0.1 | 0.853508 | 0.974 |
| PRKAB2   | 0.1 | 0.853508 | 0.974 |
| PRX      | 0.1 | 0.845936 | 0.974 |
| PSIP1    | 0.1 | 0.845936 | 0.974 |
| PSMB5    | 0.1 | 0.845936 | 0.974 |
| PYCR1    | 0.1 | 0.845936 | 0.974 |
| RASGRP4  | 0.1 | 0.845935 | 0.974 |
| RCVRN    | 0.1 | 0.845936 | 0.974 |
| RGS20    | 0.1 | 0.845936 | 0.974 |
| RTKN     | 0.1 | 0.845936 | 0.974 |
| SAV1     | 0.1 | 0.845936 | 0.974 |
| SFPQ     | 0.1 | 0.845936 | 0.974 |
| SIPA1L3  | 0.1 | 0.845936 | 0.974 |
| SLC6A14  | 0.1 | 0.845936 | 0.974 |
| SMIM5    | 0.1 | 0.845936 | 0.974 |
| SSUH2    | 0.1 | 0.853508 | 0.974 |
| STARD6   | 0.1 | 0.845936 | 0.974 |
| STK24    | 0.1 | 0.853509 | 0.974 |
| TAF9     | 0.1 | 0.845936 | 0.974 |
| TBC1D16  | 0.1 | 0.853509 | 0.974 |

|           |      |          |       |
|-----------|------|----------|-------|
| TERF2IP   | 0.1  | 0.853509 | 0.974 |
| THEGL     | 0.1  | 0.845936 | 0.974 |
| THEM5     | 0.1  | 0.845936 | 0.974 |
| TIMP3     | 0.1  | 0.845936 | 0.974 |
| TMCO4     | 0.1  | 0.845935 | 0.974 |
| TMEM198   | 0.1  | 0.845936 | 0.974 |
| TRA2B     | 0.1  | 0.845935 | 0.974 |
| TREH      | 0.1  | 0.845936 | 0.974 |
| TRIM42    | 0.1  | 0.845935 | 0.974 |
| TSSK4     | 0.1  | 0.845936 | 0.974 |
| TTC16     | 0.1  | 0.845935 | 0.974 |
| UTP14C    | 0.1  | 0.845936 | 0.974 |
| VTI1A     | 0.1  | 0.845936 | 0.974 |
| WDR72     | 0.1  | 0.845935 | 0.974 |
| ZDHHC24   | 0.1  | 0.845936 | 0.974 |
| ZNF155    | 0.1  | 0.845935 | 0.974 |
| ZNF625    | 0.1  | 0.845936 | 0.974 |
| ABCC3     | 0.11 | 0.832073 | 0.973 |
| AICDA     | 0.11 | 0.840339 | 0.974 |
| ALPI      | 0.11 | 0.832073 | 0.973 |
| AMOTL2    | 0.11 | 0.832073 | 0.973 |
| ARFGAP2   | 0.11 | 0.832073 | 0.973 |
| ARHGEF3   | 0.11 | 0.832072 | 0.973 |
| ARRDC1    | 0.11 | 0.832073 | 0.973 |
| ATAD2     | 0.11 | 0.832073 | 0.973 |
| AURKA     | 0.11 | 0.848838 | 0.974 |
| AURKC     | 0.11 | 0.832073 | 0.973 |
| BCL2L14   | 0.11 | 0.832072 | 0.973 |
| BCS1L     | 0.11 | 0.832073 | 0.973 |
| BSPH1     | 0.11 | 0.832072 | 0.973 |
| BTBD6     | 0.11 | 0.832073 | 0.973 |
| C17orf112 | 0.11 | 0.832073 | 0.973 |
| CACNB2    | 0.11 | 0.832073 | 0.973 |
| CADM2     | 0.11 | 0.832073 | 0.973 |
| CCL11     | 0.11 | 0.832072 | 0.973 |
| CHRNA3    | 0.11 | 0.832073 | 0.973 |
| CLK2      | 0.11 | 0.832073 | 0.973 |
| CRTC2     | 0.11 | 0.832072 | 0.973 |
| CRYGD     | 0.11 | 0.832072 | 0.973 |
| CYP11B2   | 0.11 | 0.832073 | 0.973 |
| DUSP21    | 0.11 | 0.832073 | 0.973 |
| EIF6      | 0.11 | 0.848838 | 0.974 |
| FABP12    | 0.11 | 0.832073 | 0.973 |
| FAM169A   | 0.11 | 0.832073 | 0.973 |
| FAM83G    | 0.11 | 0.840339 | 0.974 |
| FAM89B    | 0.11 | 0.832073 | 0.973 |
| FBXL22    | 0.11 | 0.832073 | 0.973 |

|           |      |          |       |
|-----------|------|----------|-------|
| GABRQ     | 0.11 | 0.832073 | 0.973 |
| GNA13     | 0.11 | 0.832073 | 0.973 |
| GSX2      | 0.11 | 0.832073 | 0.973 |
| H2AFJ     | 0.11 | 0.840339 | 0.974 |
| HIST1H3B  | 0.11 | 0.840339 | 0.974 |
| HP        | 0.11 | 0.832073 | 0.973 |
| IL17RB    | 0.11 | 0.832073 | 0.973 |
| IMPG1     | 0.11 | 0.840339 | 0.974 |
| IMPG2     | 0.11 | 0.832073 | 0.973 |
| ITIH1     | 0.11 | 0.832073 | 0.973 |
| KLF8      | 0.11 | 0.832073 | 0.973 |
| KRTAP6-1  | 0.11 | 0.832073 | 0.973 |
| KRTAP9-4  | 0.11 | 0.832073 | 0.973 |
| LARP6     | 0.11 | 0.832073 | 0.973 |
| LBP       | 0.11 | 0.832073 | 0.973 |
| LMBRD1    | 0.11 | 0.832073 | 0.973 |
| LOC643669 | 0.11 | 0.840339 | 0.974 |
| LRRC66    | 0.11 | 0.832072 | 0.973 |
| LTBP4     | 0.11 | 0.840339 | 0.974 |
| MACC1     | 0.11 | 0.832073 | 0.973 |
| MAPK8     | 0.11 | 0.832073 | 0.973 |
| METTL7B   | 0.11 | 0.840339 | 0.974 |
| MIA3      | 0.11 | 0.832072 | 0.973 |
| MOB2      | 0.11 | 0.832073 | 0.973 |
| MRPL28    | 0.11 | 0.848838 | 0.974 |
| MYH8      | 0.11 | 0.832073 | 0.973 |
| N4BP2L1   | 0.11 | 0.832073 | 0.973 |
| NACC1     | 0.11 | 0.832072 | 0.973 |
| NBL1      | 0.11 | 0.832072 | 0.973 |
| NCOR2     | 0.11 | 0.848838 | 0.974 |
| NFU1      | 0.11 | 0.848838 | 0.974 |
| NINJ2     | 0.11 | 0.832073 | 0.973 |
| NPBWR2    | 0.11 | 0.832073 | 0.973 |
| NR1H4     | 0.11 | 0.832072 | 0.973 |
| NUDT17    | 0.11 | 0.832073 | 0.973 |
| NUFIP2    | 0.11 | 0.832072 | 0.973 |
| NYAP2     | 0.11 | 0.832072 | 0.973 |
| OLFML1    | 0.11 | 0.832073 | 0.973 |
| OR52H1    | 0.11 | 0.832072 | 0.973 |
| OR52W1    | 0.11 | 0.832073 | 0.973 |
| OXER1     | 0.11 | 0.840339 | 0.974 |
| PAFAH2    | 0.11 | 0.832073 | 0.973 |
| PARM1     | 0.11 | 0.832073 | 0.973 |
| PCDH19    | 0.11 | 0.832073 | 0.973 |
| PCDHGA8   | 0.11 | 0.832073 | 0.973 |
| PCYT2     | 0.11 | 0.840339 | 0.974 |
| PEAK1     | 0.11 | 0.832073 | 0.973 |

|          |      |          |       |
|----------|------|----------|-------|
| PERM1    | 0.11 | 0.832072 | 0.973 |
| POT1     | 0.11 | 0.832072 | 0.973 |
| PPP1R1A  | 0.11 | 0.832073 | 0.973 |
| PPP1R9A  | 0.11 | 0.840339 | 0.974 |
| PRKD3    | 0.11 | 0.832073 | 0.973 |
| PSKH2    | 0.11 | 0.832073 | 0.973 |
| PTDSS2   | 0.11 | 0.832073 | 0.973 |
| PTPN20   | 0.11 | 0.832073 | 0.973 |
| PVRL4    | 0.11 | 0.832073 | 0.973 |
| RALBP1   | 0.11 | 0.832073 | 0.973 |
| RBM48    | 0.11 | 0.832073 | 0.973 |
| REG3A    | 0.11 | 0.832073 | 0.973 |
| RNF224   | 0.11 | 0.832073 | 0.973 |
| RPL36AL  | 0.11 | 0.840339 | 0.974 |
| RRP9     | 0.11 | 0.832073 | 0.973 |
| RSPO2    | 0.11 | 0.832073 | 0.973 |
| SDS      | 0.11 | 0.832073 | 0.973 |
| SDSL     | 0.11 | 0.832072 | 0.973 |
| SLC39A12 | 0.11 | 0.832073 | 0.973 |
| SLC44A2  | 0.11 | 0.840339 | 0.974 |
| SLC6A19  | 0.11 | 0.832073 | 0.973 |
| SMYD5    | 0.11 | 0.832073 | 0.973 |
| SNX18    | 0.11 | 0.832073 | 0.973 |
| SORCS2   | 0.11 | 0.832072 | 0.973 |
| SOST     | 0.11 | 0.832072 | 0.973 |
| SPAG6    | 0.11 | 0.832073 | 0.973 |
| SPATA2   | 0.11 | 0.840339 | 0.974 |
| SPP1     | 0.11 | 0.832073 | 0.973 |
| SPTA1    | 0.11 | 0.832073 | 0.973 |
| STRA8    | 0.11 | 0.832073 | 0.973 |
| TMC5     | 0.11 | 0.832073 | 0.973 |
| TOX3     | 0.11 | 0.832073 | 0.973 |
| TTLL5    | 0.11 | 0.840339 | 0.974 |
| TUBB8    | 0.11 | 0.848838 | 0.974 |
| UBE2L3   | 0.11 | 0.832073 | 0.973 |
| UBTD2    | 0.11 | 0.832073 | 0.973 |
| VEGFB    | 0.11 | 0.832073 | 0.973 |
| VPS37A   | 0.11 | 0.832072 | 0.973 |
| VSIG8    | 0.11 | 0.832073 | 0.973 |
| WDR96    | 0.11 | 0.840339 | 0.974 |
| ZBTB39   | 0.11 | 0.832073 | 0.973 |
| ZDHHC8   | 0.11 | 0.840339 | 0.974 |
| ZFHX2    | 0.11 | 0.832073 | 0.973 |
| ZNF747   | 0.11 | 0.840339 | 0.974 |
| ZSCAN18  | 0.11 | 0.832073 | 0.973 |
| ZXDC     | 0.11 | 0.832073 | 0.973 |
| ADC      | 0.12 | 0.818284 | 0.972 |

|          |      |          |       |
|----------|------|----------|-------|
| ADRM1    | 0.12 | 0.82718  | 0.973 |
| AFG3L2   | 0.12 | 0.836437 | 0.974 |
| AMACR    | 0.12 | 0.818284 | 0.972 |
| AQP12B   | 0.12 | 0.818285 | 0.972 |
| ARMC2    | 0.12 | 0.818285 | 0.972 |
| ATG10    | 0.12 | 0.818285 | 0.972 |
| ATP2A1   | 0.12 | 0.818284 | 0.972 |
| ATP6V1G3 | 0.12 | 0.818284 | 0.972 |
| B4GALT6  | 0.12 | 0.818284 | 0.972 |
| BARHL2   | 0.12 | 0.818285 | 0.972 |
| C12orf4  | 0.12 | 0.818284 | 0.972 |
| C3orf17  | 0.12 | 0.818284 | 0.972 |
| C3orf20  | 0.12 | 0.818284 | 0.972 |
| CAPN2    | 0.12 | 0.818285 | 0.972 |
| CATSPERG | 0.12 | 0.818284 | 0.972 |
| CCDC144A | 0.12 | 0.818284 | 0.972 |
| CCNB3    | 0.12 | 0.818284 | 0.972 |
| CELF6    | 0.12 | 0.818284 | 0.972 |
| CEP104   | 0.12 | 0.818284 | 0.972 |
| CERKL    | 0.12 | 0.818284 | 0.972 |
| COX8A    | 0.12 | 0.818284 | 0.972 |
| CTHRC1   | 0.12 | 0.818284 | 0.972 |
| CTXN2    | 0.12 | 0.818284 | 0.972 |
| CXorf38  | 0.12 | 0.818285 | 0.972 |
| CYP20A1  | 0.12 | 0.818285 | 0.972 |
| DARS2    | 0.12 | 0.836437 | 0.974 |
| DDTL     | 0.12 | 0.818285 | 0.972 |
| DRD2     | 0.12 | 0.818284 | 0.972 |
| EDN3     | 0.12 | 0.818284 | 0.972 |
| EML1     | 0.12 | 0.818284 | 0.972 |
| EPSTI1   | 0.12 | 0.82718  | 0.973 |
| ESX1     | 0.12 | 0.827179 | 0.973 |
| FABP6    | 0.12 | 0.827179 | 0.973 |
| FAM101B  | 0.12 | 0.818284 | 0.972 |
| FAM150B  | 0.12 | 0.82718  | 0.973 |
| FGF4     | 0.12 | 0.818285 | 0.972 |
| FSCN1    | 0.12 | 0.818285 | 0.972 |
| GABPA    | 0.12 | 0.818285 | 0.972 |
| GAGE10   | 0.12 | 0.818285 | 0.972 |
| GCK      | 0.12 | 0.82718  | 0.973 |
| GJA1     | 0.12 | 0.818284 | 0.972 |
| GPD2     | 0.12 | 0.818285 | 0.972 |
| GRAP2    | 0.12 | 0.818285 | 0.972 |
| GZMA     | 0.12 | 0.818285 | 0.972 |
| HCCS     | 0.12 | 0.82718  | 0.973 |
| HCRT     | 0.12 | 0.818285 | 0.972 |
| HDAC1    | 0.12 | 0.818284 | 0.972 |

|          |      |          |       |
|----------|------|----------|-------|
| HOXA4    | 0.12 | 0.818284 | 0.972 |
| HSBP1    | 0.12 | 0.818284 | 0.972 |
| ICAM2    | 0.12 | 0.818284 | 0.972 |
| IL1RAPL2 | 0.12 | 0.818284 | 0.972 |
| INADL    | 0.12 | 0.818284 | 0.972 |
| KCNT1    | 0.12 | 0.818285 | 0.972 |
| KDM3A    | 0.12 | 0.818284 | 0.972 |
| KIF2C    | 0.12 | 0.818284 | 0.972 |
| KIF9     | 0.12 | 0.818284 | 0.972 |
| KRTCAP2  | 0.12 | 0.818285 | 0.972 |
| LLGL1    | 0.12 | 0.818284 | 0.972 |
| LRRC18   | 0.12 | 0.818285 | 0.972 |
| LRRC70   | 0.12 | 0.818284 | 0.972 |
| MAD1L1   | 0.12 | 0.82718  | 0.973 |
| MAGEB10  | 0.12 | 0.818284 | 0.972 |
| MAPK9    | 0.12 | 0.818284 | 0.972 |
| MASP1    | 0.12 | 0.818285 | 0.972 |
| MCU      | 0.12 | 0.818284 | 0.972 |
| METTL21B | 0.12 | 0.818284 | 0.972 |
| METTL9   | 0.12 | 0.818284 | 0.972 |
| MFSD3    | 0.12 | 0.818285 | 0.972 |
| MICAL3   | 0.12 | 0.818285 | 0.972 |
| MMP25    | 0.12 | 0.818284 | 0.972 |
| MOSPD1   | 0.12 | 0.818284 | 0.972 |
| MPO      | 0.12 | 0.818284 | 0.972 |
| MYCBPAP  | 0.12 | 0.818284 | 0.972 |
| NDUFB1   | 0.12 | 0.818284 | 0.972 |
| NIF3L1   | 0.12 | 0.818285 | 0.972 |
| NR1H3    | 0.12 | 0.818285 | 0.972 |
| OR1B1    | 0.12 | 0.818285 | 0.972 |
| OR2T2    | 0.12 | 0.818285 | 0.972 |
| OTOP2    | 0.12 | 0.82718  | 0.973 |
| PACRG    | 0.12 | 0.818285 | 0.972 |
| PHF15    | 0.12 | 0.818285 | 0.972 |
| PHGR1    | 0.12 | 0.818285 | 0.972 |
| POGK     | 0.12 | 0.818285 | 0.972 |
| POU6F1   | 0.12 | 0.818284 | 0.972 |
| PPFIBP1  | 0.12 | 0.818285 | 0.972 |
| PRAMEF1  | 0.12 | 0.818284 | 0.972 |
| PRM2     | 0.12 | 0.818284 | 0.972 |
| PTPN13   | 0.12 | 0.818284 | 0.972 |
| RAB6C    | 0.12 | 0.818285 | 0.972 |
| RAN      | 0.12 | 0.818284 | 0.972 |
| RBBP7    | 0.12 | 0.818285 | 0.972 |
| RBM46    | 0.12 | 0.818284 | 0.972 |
| RHOBTB1  | 0.12 | 0.818285 | 0.972 |
| RPL36A   | 0.12 | 0.818285 | 0.972 |

|          |      |          |       |
|----------|------|----------|-------|
| RPP38    | 0.12 | 0.82718  | 0.973 |
| RPS7     | 0.12 | 0.818284 | 0.972 |
| RYK      | 0.12 | 0.836437 | 0.974 |
| SAMM50   | 0.12 | 0.82718  | 0.973 |
| SCEL     | 0.12 | 0.82718  | 0.973 |
| SEMA4F   | 0.12 | 0.818285 | 0.972 |
| SERPING1 | 0.12 | 0.818285 | 0.972 |
| SLC23A3  | 0.12 | 0.827179 | 0.973 |
| SLC43A2  | 0.12 | 0.818284 | 0.972 |
| SLC6A1   | 0.12 | 0.818284 | 0.972 |
| SMPDL3A  | 0.12 | 0.818284 | 0.972 |
| SOX11    | 0.12 | 0.818284 | 0.972 |
| SPDYC    | 0.12 | 0.818284 | 0.972 |
| SPTB     | 0.12 | 0.827179 | 0.973 |
| SSR3     | 0.12 | 0.818284 | 0.972 |
| STK11IP  | 0.12 | 0.818285 | 0.972 |
| STX7     | 0.12 | 0.818284 | 0.972 |
| SVIL     | 0.12 | 0.818285 | 0.972 |
| TAF12    | 0.12 | 0.818284 | 0.972 |
| TAOK1    | 0.12 | 0.818284 | 0.972 |
| TFIP11   | 0.12 | 0.82718  | 0.973 |
| THAP3    | 0.12 | 0.82718  | 0.973 |
| TM7SF2   | 0.12 | 0.818284 | 0.972 |
| TMEM130  | 0.12 | 0.82718  | 0.973 |
| TNFSF18  | 0.12 | 0.818284 | 0.972 |
| TNS1     | 0.12 | 0.818284 | 0.972 |
| TPCN1    | 0.12 | 0.818284 | 0.972 |
| TPST2    | 0.12 | 0.818284 | 0.972 |
| TTI2     | 0.12 | 0.818284 | 0.972 |
| TXNRD3   | 0.12 | 0.82718  | 0.973 |
| UCHL3    | 0.12 | 0.818285 | 0.972 |
| ULK1     | 0.12 | 0.818284 | 0.972 |
| UPF1     | 0.12 | 0.818285 | 0.972 |
| URB1     | 0.12 | 0.82718  | 0.973 |
| USP11    | 0.12 | 0.818284 | 0.972 |
| VAV1     | 0.12 | 0.82718  | 0.973 |
| WDR19    | 0.12 | 0.82718  | 0.973 |
| ZNF572   | 0.12 | 0.818285 | 0.972 |
| AAAS     | 0.13 | 0.814247 | 0.972 |
| ADH1B    | 0.13 | 0.814248 | 0.972 |
| ARHGAP36 | 0.13 | 0.804564 | 0.971 |
| ARHGAP44 | 0.13 | 0.804564 | 0.971 |
| ARHGEF25 | 0.13 | 0.804564 | 0.971 |
| ARVCF    | 0.13 | 0.804564 | 0.971 |
| ASIC1    | 0.13 | 0.804564 | 0.971 |
| ATAD2B   | 0.13 | 0.824076 | 0.973 |
| AURKAIP1 | 0.13 | 0.814248 | 0.972 |

|          |      |          |       |
|----------|------|----------|-------|
| BCL7C    | 0.13 | 0.804564 | 0.971 |
| BMP3     | 0.13 | 0.804564 | 0.971 |
| CCDC117  | 0.13 | 0.804564 | 0.971 |
| CCDC124  | 0.13 | 0.804564 | 0.971 |
| CCL4L1   | 0.13 | 0.804564 | 0.971 |
| CDADC1   | 0.13 | 0.804564 | 0.971 |
| CDH8     | 0.13 | 0.804564 | 0.971 |
| CDYL     | 0.13 | 0.814247 | 0.972 |
| CECR1    | 0.13 | 0.804564 | 0.971 |
| CES1     | 0.13 | 0.804564 | 0.971 |
| CHCHD2   | 0.13 | 0.804564 | 0.971 |
| COL1A1   | 0.13 | 0.804564 | 0.971 |
| COX15    | 0.13 | 0.804564 | 0.971 |
| COX7B    | 0.13 | 0.804564 | 0.971 |
| CPSF3    | 0.13 | 0.814247 | 0.972 |
| CYP11B1  | 0.13 | 0.804564 | 0.971 |
| DEF8     | 0.13 | 0.804564 | 0.971 |
| DEFB108B | 0.13 | 0.804564 | 0.971 |
| DHCR24   | 0.13 | 0.804564 | 0.971 |
| DNAJC19  | 0.13 | 0.814247 | 0.972 |
| DPPA2    | 0.13 | 0.804564 | 0.971 |
| DSTN     | 0.13 | 0.814248 | 0.972 |
| EN2      | 0.13 | 0.804564 | 0.971 |
| EPB41L4A | 0.13 | 0.804564 | 0.971 |
| ERGIC3   | 0.13 | 0.804564 | 0.971 |
| ERMP1    | 0.13 | 0.804564 | 0.971 |
| FAS      | 0.13 | 0.804564 | 0.971 |
| FHAD1    | 0.13 | 0.804564 | 0.971 |
| FSD1     | 0.13 | 0.814248 | 0.972 |
| GNG11    | 0.13 | 0.814247 | 0.972 |
| GPBAR1   | 0.13 | 0.804564 | 0.971 |
| GPR15    | 0.13 | 0.804564 | 0.971 |
| HAO2     | 0.13 | 0.804564 | 0.971 |
| HES2     | 0.13 | 0.804564 | 0.971 |
| HLA-DPA1 | 0.13 | 0.814248 | 0.972 |
| HOXB13   | 0.13 | 0.804564 | 0.971 |
| IFT81    | 0.13 | 0.804564 | 0.971 |
| ILDR1    | 0.13 | 0.804564 | 0.971 |
| KRT40    | 0.13 | 0.804564 | 0.971 |
| KRTAP9-9 | 0.13 | 0.814248 | 0.972 |
| LRRC8D   | 0.13 | 0.804564 | 0.971 |
| LRRN2    | 0.13 | 0.814247 | 0.972 |
| LZIC     | 0.13 | 0.804564 | 0.971 |
| MAPRE3   | 0.13 | 0.814248 | 0.972 |
| MARVELD1 | 0.13 | 0.872855 | 0.975 |
| MPHOSPH8 | 0.13 | 0.814248 | 0.972 |
| MROH1    | 0.13 | 0.804564 | 0.971 |

|          |      |          |       |
|----------|------|----------|-------|
| MUC7     | 0.13 | 0.804564 | 0.971 |
| MUM1L1   | 0.13 | 0.804564 | 0.971 |
| MYL9     | 0.13 | 0.804564 | 0.971 |
| MYO6     | 0.13 | 0.804564 | 0.971 |
| NDUFA9   | 0.13 | 0.804564 | 0.971 |
| NICN1    | 0.13 | 0.804564 | 0.971 |
| NUP37    | 0.13 | 0.804564 | 0.971 |
| OLAH     | 0.13 | 0.804564 | 0.971 |
| OLFML2A  | 0.13 | 0.804564 | 0.971 |
| OR1D5    | 0.13 | 0.804564 | 0.971 |
| OR1K1    | 0.13 | 0.814248 | 0.972 |
| OTOL1    | 0.13 | 0.804564 | 0.971 |
| PCMTD2   | 0.13 | 0.804564 | 0.971 |
| PCSK7    | 0.13 | 0.804564 | 0.971 |
| PFKFB1   | 0.13 | 0.804564 | 0.971 |
| PIGX     | 0.13 | 0.804564 | 0.971 |
| PLA2G4F  | 0.13 | 0.804564 | 0.971 |
| PLA2G5   | 0.13 | 0.804564 | 0.971 |
| PLP2     | 0.13 | 0.804564 | 0.971 |
| PNMA6A   | 0.13 | 0.804564 | 0.971 |
| PXDC1    | 0.13 | 0.804564 | 0.971 |
| RAB41    | 0.13 | 0.804564 | 0.971 |
| RANGAP1  | 0.13 | 0.824076 | 0.973 |
| RAX      | 0.13 | 0.804564 | 0.971 |
| RNASE1   | 0.13 | 0.814247 | 0.972 |
| RNF217   | 0.13 | 0.814247 | 0.972 |
| RNPS1    | 0.13 | 0.824076 | 0.973 |
| RPS6KA4  | 0.13 | 0.804564 | 0.971 |
| RTN4     | 0.13 | 0.804564 | 0.971 |
| RTP1     | 0.13 | 0.804564 | 0.971 |
| SEC22C   | 0.13 | 0.804564 | 0.971 |
| SEMA3C   | 0.13 | 0.814247 | 0.972 |
| SH3BP1   | 0.13 | 0.804564 | 0.971 |
| SLC15A4  | 0.13 | 0.804564 | 0.971 |
| SLC19A3  | 0.13 | 0.804564 | 0.971 |
| SLC22A18 | 0.13 | 0.804564 | 0.971 |
| SMIM2    | 0.13 | 0.83524  | 0.974 |
| SNAI3    | 0.13 | 0.804564 | 0.971 |
| SNPH     | 0.13 | 0.804564 | 0.971 |
| SNRPD1   | 0.13 | 0.83524  | 0.974 |
| SNX13    | 0.13 | 0.804564 | 0.971 |
| SNX3     | 0.13 | 0.814248 | 0.972 |
| SPIN1    | 0.13 | 0.804564 | 0.971 |
| SPINK1   | 0.13 | 0.804564 | 0.971 |
| ST8SIA2  | 0.13 | 0.814248 | 0.972 |
| STC1     | 0.13 | 0.804564 | 0.971 |
| SULF2    | 0.13 | 0.804564 | 0.971 |

|          |      |          |       |
|----------|------|----------|-------|
| TARSL2   | 0.13 | 0.804564 | 0.971 |
| TDRKH    | 0.13 | 0.804564 | 0.971 |
| TMEM101  | 0.13 | 0.804564 | 0.971 |
| TMEM184B | 0.13 | 0.814247 | 0.972 |
| TMEM200A | 0.13 | 0.804564 | 0.971 |
| TOPBP1   | 0.13 | 0.824076 | 0.973 |
| TRO      | 0.13 | 0.814248 | 0.972 |
| TRPC4AP  | 0.13 | 0.804564 | 0.971 |
| TSHZ1    | 0.13 | 0.804564 | 0.971 |
| TTPA     | 0.13 | 0.804564 | 0.971 |
| TUBA1C   | 0.13 | 0.814247 | 0.972 |
| USP6     | 0.13 | 0.814247 | 0.972 |
| ZNF662   | 0.13 | 0.804564 | 0.971 |
| ZNF84    | 0.13 | 0.804564 | 0.971 |
| ACTL10   | 0.14 | 0.790934 | 0.968 |
| ACYP1    | 0.14 | 0.790934 | 0.968 |
| ADAMTS15 | 0.14 | 0.790933 | 0.968 |
| AMBRA1   | 0.14 | 0.801198 | 0.971 |
| AP2B1    | 0.14 | 0.790934 | 0.968 |
| APOBEC3A | 0.14 | 0.790934 | 0.968 |
| APOE     | 0.14 | 0.801199 | 0.971 |
| APOL4    | 0.14 | 0.790933 | 0.968 |
| ARL14EP  | 0.14 | 0.790934 | 0.968 |
| ARL3     | 0.14 | 0.790934 | 0.968 |
| ARMC1    | 0.14 | 0.790933 | 0.968 |
| ATG2A    | 0.14 | 0.801199 | 0.971 |
| ATG4B    | 0.14 | 0.790933 | 0.968 |
| ATP6V1G2 | 0.14 | 0.790934 | 0.968 |
| AWAT1    | 0.14 | 0.801199 | 0.971 |
| C1orf204 | 0.14 | 0.790934 | 0.968 |
| C1orf94  | 0.14 | 0.790933 | 0.968 |
| C6orf211 | 0.14 | 0.790933 | 0.968 |
| C7orf62  | 0.14 | 0.790934 | 0.968 |
| CD177    | 0.14 | 0.801198 | 0.971 |
| CD37     | 0.14 | 0.790934 | 0.968 |
| CDC25A   | 0.14 | 0.790933 | 0.968 |
| CDK2AP1  | 0.14 | 0.790933 | 0.968 |
| CDKN1C   | 0.14 | 0.790933 | 0.968 |
| CHMP4A   | 0.14 | 0.790934 | 0.968 |
| CIRH1A   | 0.14 | 0.801198 | 0.971 |
| CLPTM1   | 0.14 | 0.790934 | 0.968 |
| CNRIP1   | 0.14 | 0.790933 | 0.968 |
| COQ7     | 0.14 | 0.790933 | 0.968 |
| CPNE5    | 0.14 | 0.790934 | 0.968 |
| CSPP1    | 0.14 | 0.790934 | 0.968 |
| CYB5D1   | 0.14 | 0.790933 | 0.968 |
| DHRS7B   | 0.14 | 0.790934 | 0.968 |

|          |      |          |       |
|----------|------|----------|-------|
| DMRTC2   | 0.14 | 0.790934 | 0.968 |
| DONSON   | 0.14 | 0.835704 | 0.974 |
| DYNLT3   | 0.14 | 0.790934 | 0.968 |
| EFHC1    | 0.14 | 0.790933 | 0.968 |
| EFR3B    | 0.14 | 0.790933 | 0.968 |
| EIF4E3   | 0.14 | 0.790934 | 0.968 |
| EPCAM    | 0.14 | 0.790933 | 0.968 |
| EXOC6B   | 0.14 | 0.790933 | 0.968 |
| FAM171A1 | 0.14 | 0.790934 | 0.968 |
| FBXL7    | 0.14 | 0.801199 | 0.971 |
| FLNB     | 0.14 | 0.790933 | 0.968 |
| GPC3     | 0.14 | 0.790934 | 0.968 |
| GRIN2A   | 0.14 | 0.801198 | 0.971 |
| GUCA2B   | 0.14 | 0.801199 | 0.971 |
| HBA1     | 0.14 | 0.801199 | 0.971 |
| HBA2     | 0.14 | 0.801199 | 0.971 |
| HLA-F    | 0.14 | 0.790933 | 0.968 |
| IFI27    | 0.14 | 0.790933 | 0.968 |
| IGFL1    | 0.14 | 0.790934 | 0.968 |
| ILF3     | 0.14 | 0.811787 | 0.972 |
| KCNQ5    | 0.14 | 0.790933 | 0.968 |
| KNCN     | 0.14 | 0.790933 | 0.968 |
| LRRN4CL  | 0.14 | 0.790934 | 0.968 |
| MAP3K14  | 0.14 | 0.790934 | 0.968 |
| MAPK8IP1 | 0.14 | 0.790933 | 0.968 |
| MAPKAPK5 | 0.14 | 0.790934 | 0.968 |
| MBD6     | 0.14 | 0.801198 | 0.971 |
| MCM3AP   | 0.14 | 0.790933 | 0.968 |
| MCMBP    | 0.14 | 0.801199 | 0.971 |
| MMD      | 0.14 | 0.790933 | 0.968 |
| MPV17    | 0.14 | 0.790934 | 0.968 |
| MRPL39   | 0.14 | 0.790934 | 0.968 |
| MTRNR2L3 | 0.14 | 0.849243 | 0.974 |
| MYBL2    | 0.14 | 0.790933 | 0.968 |
| MYO1F    | 0.14 | 0.790933 | 0.968 |
| NDUFA2   | 0.14 | 0.790933 | 0.968 |
| NKX2-5   | 0.14 | 0.790933 | 0.968 |
| NOP56    | 0.14 | 0.790934 | 0.968 |
| NPHP3    | 0.14 | 0.790934 | 0.968 |
| NPHS1    | 0.14 | 0.801198 | 0.971 |
| NPVF     | 0.14 | 0.790933 | 0.968 |
| OR11H2   | 0.14 | 0.790934 | 0.968 |
| OR2B3    | 0.14 | 0.801198 | 0.971 |
| OR8D2    | 0.14 | 0.790933 | 0.968 |
| PAFAH1B1 | 0.14 | 0.849243 | 0.974 |
| PHAX     | 0.14 | 0.801199 | 0.971 |
| PLLP     | 0.14 | 0.790934 | 0.968 |

|          |      |          |       |
|----------|------|----------|-------|
| PPA2     | 0.14 | 0.801199 | 0.971 |
| PPP1R12A | 0.14 | 0.790933 | 0.968 |
| PRSS37   | 0.14 | 0.790934 | 0.968 |
| RAB3IP   | 0.14 | 0.790934 | 0.968 |
| RAI2     | 0.14 | 0.790934 | 0.968 |
| RANBP2   | 0.14 | 0.790933 | 0.968 |
| RBBP9    | 0.14 | 0.790933 | 0.968 |
| RBP3     | 0.14 | 0.790934 | 0.968 |
| RHOC     | 0.14 | 0.801199 | 0.971 |
| RND1     | 0.14 | 0.790934 | 0.968 |
| RNF212B  | 0.14 | 0.801198 | 0.971 |
| RPE65    | 0.14 | 0.790933 | 0.968 |
| SAG      | 0.14 | 0.790933 | 0.968 |
| SLMO1    | 0.14 | 0.790933 | 0.968 |
| SMCO4    | 0.14 | 0.790933 | 0.968 |
| SMNDC1   | 0.14 | 0.790933 | 0.968 |
| SOS2     | 0.14 | 0.811787 | 0.972 |
| TBKBP1   | 0.14 | 0.790933 | 0.968 |
| TBPL1    | 0.14 | 0.790933 | 0.968 |
| TMEM52   | 0.14 | 0.790933 | 0.968 |
| TMEM60   | 0.14 | 0.801198 | 0.971 |
| TNNI3K   | 0.14 | 0.790934 | 0.968 |
| TSKU     | 0.14 | 0.790934 | 0.968 |
| TSPAN8   | 0.14 | 0.790933 | 0.968 |
| TTBK1    | 0.14 | 0.790934 | 0.968 |
| UFSP1    | 0.14 | 0.790934 | 0.968 |
| VPS13A   | 0.14 | 0.790933 | 0.968 |
| VPS33A   | 0.14 | 0.790933 | 0.968 |
| WBP2     | 0.14 | 0.801199 | 0.971 |
| XKRX     | 0.14 | 0.790934 | 0.968 |
| ZNF217   | 0.14 | 0.801199 | 0.971 |
| ZNF583   | 0.14 | 0.790934 | 0.968 |
| ACVR1    | 0.15 | 0.777426 | 0.965 |
| ADAM19   | 0.15 | 0.788329 | 0.968 |
| ADAMTSL5 | 0.15 | 0.788329 | 0.968 |
| ANKRA2   | 0.15 | 0.777426 | 0.965 |
| ARHGEF4  | 0.15 | 0.777426 | 0.965 |
| BRCA2    | 0.15 | 0.777426 | 0.965 |
| BRF2     | 0.15 | 0.788328 | 0.968 |
| C11orf94 | 0.15 | 0.777426 | 0.965 |
| C16orf47 | 0.15 | 0.777426 | 0.965 |
| C16orf52 | 0.15 | 0.777426 | 0.965 |
| C1orf115 | 0.15 | 0.777426 | 0.965 |
| CACNA1E  | 0.15 | 0.777426 | 0.965 |
| CAMKK2   | 0.15 | 0.777426 | 0.965 |
| CAPN13   | 0.15 | 0.777426 | 0.965 |
| CCDC67   | 0.15 | 0.777426 | 0.965 |

|            |      |          |       |
|------------|------|----------|-------|
| CENPL      | 0.15 | 0.788329 | 0.968 |
| CERS3      | 0.15 | 0.777427 | 0.965 |
| CGB5       | 0.15 | 0.777426 | 0.965 |
| CGB8       | 0.15 | 0.777426 | 0.965 |
| COL5A2     | 0.15 | 0.777426 | 0.965 |
| COL6A3     | 0.15 | 0.777426 | 0.965 |
| CORO7      | 0.15 | 0.777426 | 0.965 |
| CPEB4      | 0.15 | 0.777426 | 0.965 |
| CUEDC2     | 0.15 | 0.777426 | 0.965 |
| DAAM1      | 0.15 | 0.788328 | 0.968 |
| DCST1      | 0.15 | 0.777427 | 0.965 |
| DMRT3      | 0.15 | 0.777426 | 0.965 |
| DNAJC30    | 0.15 | 0.777427 | 0.965 |
| DNASE1L2   | 0.15 | 0.777426 | 0.965 |
| DPF1       | 0.15 | 0.777426 | 0.965 |
| EMB        | 0.15 | 0.777426 | 0.965 |
| FAM170B    | 0.15 | 0.777426 | 0.965 |
| FAM172A    | 0.15 | 0.788329 | 0.968 |
| FAM3B      | 0.15 | 0.777426 | 0.965 |
| FOXJ1      | 0.15 | 0.777426 | 0.965 |
| FRMPD2     | 0.15 | 0.777426 | 0.965 |
| FUCA1      | 0.15 | 0.777426 | 0.965 |
| GGT1       | 0.15 | 0.777426 | 0.965 |
| GLS        | 0.15 | 0.777426 | 0.965 |
| GSTM2      | 0.15 | 0.777427 | 0.965 |
| HCAR3      | 0.15 | 0.777426 | 0.965 |
| HSP90AB1   | 0.15 | 0.788328 | 0.968 |
| IGF1R      | 0.15 | 0.788329 | 0.968 |
| IKBKB      | 0.15 | 0.777426 | 0.965 |
| IL3        | 0.15 | 0.788329 | 0.968 |
| JAKMIP2    | 0.15 | 0.777426 | 0.965 |
| JMJD7-PLA2 | 0.15 | 0.777427 | 0.965 |
| KIAA0513   | 0.15 | 0.777426 | 0.965 |
| KLHL35     | 0.15 | 0.777427 | 0.965 |
| LILRA3     | 0.15 | 0.777427 | 0.965 |
| LRPAP1     | 0.15 | 0.777426 | 0.965 |
| LRRC58     | 0.15 | 0.777426 | 0.965 |
| LYPD8      | 0.15 | 0.777426 | 0.965 |
| MAGEF1     | 0.15 | 0.777427 | 0.965 |
| MEF2D      | 0.15 | 0.788329 | 0.968 |
| MFSD12     | 0.15 | 0.788328 | 0.968 |
| MOS        | 0.15 | 0.777426 | 0.965 |
| MPEG1      | 0.15 | 0.777426 | 0.965 |
| MSMP       | 0.15 | 0.777426 | 0.965 |
| MT4        | 0.15 | 0.777426 | 0.965 |
| MYL12B     | 0.15 | 0.788328 | 0.968 |
| NDUFA6     | 0.15 | 0.788328 | 0.968 |

|          |      |          |       |
|----------|------|----------|-------|
| NPPC     | 0.15 | 0.777426 | 0.965 |
| NR3C1    | 0.15 | 0.777426 | 0.965 |
| NRXN1    | 0.15 | 0.777426 | 0.965 |
| NTAN1    | 0.15 | 0.777426 | 0.965 |
| NUSAP1   | 0.15 | 0.777426 | 0.965 |
| OPTN     | 0.15 | 0.777426 | 0.965 |
| OR56B4   | 0.15 | 0.788329 | 0.968 |
| OR5T3    | 0.15 | 0.788329 | 0.968 |
| OXT      | 0.15 | 0.777427 | 0.965 |
| P4HTM    | 0.15 | 0.777426 | 0.965 |
| PAGE3    | 0.15 | 0.777426 | 0.965 |
| PCDH8    | 0.15 | 0.777426 | 0.965 |
| PCDHA3   | 0.15 | 0.777426 | 0.965 |
| PCDHB11  | 0.15 | 0.777426 | 0.965 |
| PDE6B    | 0.15 | 0.777426 | 0.965 |
| PERP     | 0.15 | 0.777426 | 0.965 |
| PIAS3    | 0.15 | 0.777426 | 0.965 |
| PLA2G2F  | 0.15 | 0.777426 | 0.965 |
| PLCH2    | 0.15 | 0.788328 | 0.968 |
| PODXL2   | 0.15 | 0.777426 | 0.965 |
| POLR1B   | 0.15 | 0.812111 | 0.972 |
| PPAP2B   | 0.15 | 0.777426 | 0.965 |
| PRAC1    | 0.15 | 0.788328 | 0.968 |
| RPL28    | 0.15 | 0.777426 | 0.965 |
| RPL9     | 0.15 | 0.777426 | 0.965 |
| RPP14    | 0.15 | 0.788329 | 0.968 |
| RPS6KC1  | 0.15 | 0.777427 | 0.965 |
| RPS9     | 0.15 | 0.824947 | 0.973 |
| SCO1     | 0.15 | 0.777426 | 0.965 |
| SLC22A14 | 0.15 | 0.777426 | 0.965 |
| SLC26A1  | 0.15 | 0.777427 | 0.965 |
| SMPD3    | 0.15 | 0.777426 | 0.965 |
| SPAG1    | 0.15 | 0.777426 | 0.965 |
| SRBD1    | 0.15 | 0.79949  | 0.971 |
| STAT5B   | 0.15 | 0.777427 | 0.965 |
| SULT6B1  | 0.15 | 0.777426 | 0.965 |
| TAS1R1   | 0.15 | 0.777426 | 0.965 |
| TBC1D10A | 0.15 | 0.777426 | 0.965 |
| TCEB3CL2 | 0.15 | 0.777426 | 0.965 |
| TFAP2E   | 0.15 | 0.777427 | 0.965 |
| TFDP3    | 0.15 | 0.777427 | 0.965 |
| TMEM161A | 0.15 | 0.777426 | 0.965 |
| TMEM86B  | 0.15 | 0.777426 | 0.965 |
| TRAP1    | 0.15 | 0.777426 | 0.965 |
| TRIM14   | 0.15 | 0.777427 | 0.965 |
| TRPC6    | 0.15 | 0.777427 | 0.965 |
| UNC119B  | 0.15 | 0.799491 | 0.971 |

|           |      |          |       |
|-----------|------|----------|-------|
| ZNF283    | 0.15 | 0.777426 | 0.965 |
| ZNF337    | 0.15 | 0.777426 | 0.965 |
| ZNF394    | 0.15 | 0.777426 | 0.965 |
| ZNF48     | 0.15 | 0.788329 | 0.968 |
| ZNF839    | 0.15 | 0.777426 | 0.965 |
| ZNF843    | 0.15 | 0.777426 | 0.965 |
| ZNF850    | 0.15 | 0.777426 | 0.965 |
| ACCSL     | 0.16 | 0.763971 | 0.962 |
| ACTN2     | 0.16 | 0.76397  | 0.962 |
| ADAM30    | 0.16 | 0.76397  | 0.962 |
| AHSP      | 0.16 | 0.76397  | 0.962 |
| ALDH1B1   | 0.16 | 0.76397  | 0.962 |
| ALKBH5    | 0.16 | 0.76397  | 0.962 |
| ANGEL2    | 0.16 | 0.76397  | 0.962 |
| ANKS1A    | 0.16 | 0.775458 | 0.965 |
| APOL1     | 0.16 | 0.76397  | 0.962 |
| ATP6V1C2  | 0.16 | 0.76397  | 0.962 |
| AUNIP     | 0.16 | 0.76397  | 0.962 |
| BLNK      | 0.16 | 0.76397  | 0.962 |
| BLOC1S3   | 0.16 | 0.763971 | 0.962 |
| BTG3      | 0.16 | 0.763971 | 0.962 |
| C19orf59  | 0.16 | 0.76397  | 0.962 |
| C20orf173 | 0.16 | 0.763971 | 0.962 |
| C20orf26  | 0.16 | 0.763971 | 0.962 |
| C5        | 0.16 | 0.76397  | 0.962 |
| C5orf51   | 0.16 | 0.775458 | 0.965 |
| CAAP1     | 0.16 | 0.76397  | 0.962 |
| CAPN8     | 0.16 | 0.76397  | 0.962 |
| CATSPERD  | 0.16 | 0.76397  | 0.962 |
| CCL24     | 0.16 | 0.76397  | 0.962 |
| CD80      | 0.16 | 0.76397  | 0.962 |
| CLEC4A    | 0.16 | 0.76397  | 0.962 |
| COLCA2    | 0.16 | 0.775458 | 0.965 |
| COLGALT2  | 0.16 | 0.76397  | 0.962 |
| CXCR5     | 0.16 | 0.775458 | 0.965 |
| CYB5A     | 0.16 | 0.775458 | 0.965 |
| DAB2IP    | 0.16 | 0.775458 | 0.965 |
| DAZ3      | 0.16 | 0.76397  | 0.962 |
| DEFB103A  | 0.16 | 0.763971 | 0.962 |
| DEFB103B  | 0.16 | 0.76397  | 0.962 |
| DEFB133   | 0.16 | 0.829465 | 0.973 |
| DENND2D   | 0.16 | 0.76397  | 0.962 |
| DFFA      | 0.16 | 0.76397  | 0.962 |
| DNER      | 0.16 | 0.76397  | 0.962 |
| ELP2      | 0.16 | 0.763971 | 0.962 |
| FAM160B1  | 0.16 | 0.763971 | 0.962 |
| FAM25C    | 0.16 | 0.763971 | 0.962 |

|         |      |          |       |
|---------|------|----------|-------|
| FAM50B  | 0.16 | 0.763971 | 0.962 |
| FBLN1   | 0.16 | 0.76397  | 0.962 |
| FBXO4   | 0.16 | 0.775458 | 0.965 |
| FBXO40  | 0.16 | 0.775458 | 0.965 |
| FGD1    | 0.16 | 0.76397  | 0.962 |
| FLT3LG  | 0.16 | 0.763971 | 0.962 |
| FMO5    | 0.16 | 0.76397  | 0.962 |
| FNDC4   | 0.16 | 0.76397  | 0.962 |
| GCM2    | 0.16 | 0.775458 | 0.965 |
| GLRA3   | 0.16 | 0.763971 | 0.962 |
| GMFG    | 0.16 | 0.775458 | 0.965 |
| GNL3L   | 0.16 | 0.775458 | 0.965 |
| GPR21   | 0.16 | 0.76397  | 0.962 |
| GUCA1B  | 0.16 | 0.76397  | 0.962 |
| HBG1    | 0.16 | 0.76397  | 0.962 |
| HEMK1   | 0.16 | 0.76397  | 0.962 |
| HPN     | 0.16 | 0.775458 | 0.965 |
| IFNLR1  | 0.16 | 0.76397  | 0.962 |
| IFT57   | 0.16 | 0.763971 | 0.962 |
| IGSF10  | 0.16 | 0.76397  | 0.962 |
| ITGA3   | 0.16 | 0.763971 | 0.962 |
| KCNJ8   | 0.16 | 0.76397  | 0.962 |
| KCTD16  | 0.16 | 0.76397  | 0.962 |
| KLF5    | 0.16 | 0.76397  | 0.962 |
| LACTB   | 0.16 | 0.763971 | 0.962 |
| LRRC23  | 0.16 | 0.787301 | 0.968 |
| MEST    | 0.16 | 0.76397  | 0.962 |
| MEX3D   | 0.16 | 0.76397  | 0.962 |
| MMACHC  | 0.16 | 0.76397  | 0.962 |
| MNX1    | 0.16 | 0.763971 | 0.962 |
| NCKAP5  | 0.16 | 0.76397  | 0.962 |
| NDUFA5  | 0.16 | 0.763971 | 0.962 |
| NDUFAF5 | 0.16 | 0.787301 | 0.968 |
| NEUROG2 | 0.16 | 0.76397  | 0.962 |
| NMD3    | 0.16 | 0.76397  | 0.962 |
| NT5C1B  | 0.16 | 0.76397  | 0.962 |
| NXPH1   | 0.16 | 0.76397  | 0.962 |
| NXPH3   | 0.16 | 0.775458 | 0.965 |
| OBSCN   | 0.16 | 0.76397  | 0.962 |
| OR11G2  | 0.16 | 0.76397  | 0.962 |
| OR4F6   | 0.16 | 0.775458 | 0.965 |
| OR6Y1   | 0.16 | 0.76397  | 0.962 |
| OTOS    | 0.16 | 0.76397  | 0.962 |
| OTP     | 0.16 | 0.763971 | 0.962 |
| OXGR1   | 0.16 | 0.763971 | 0.962 |
| PAGE4   | 0.16 | 0.763971 | 0.962 |
| PASD1   | 0.16 | 0.76397  | 0.962 |

|           |      |          |       |
|-----------|------|----------|-------|
| PCNXL3    | 0.16 | 0.76397  | 0.962 |
| PIBF1     | 0.16 | 0.76397  | 0.962 |
| POTEB3    | 0.16 | 0.76397  | 0.962 |
| PPARGC1A  | 0.16 | 0.76397  | 0.962 |
| PRELID1   | 0.16 | 0.76397  | 0.962 |
| PRSS46    | 0.16 | 0.763971 | 0.962 |
| RNF157    | 0.16 | 0.787301 | 0.968 |
| RSAD2     | 0.16 | 0.775458 | 0.965 |
| SELM      | 0.16 | 0.76397  | 0.962 |
| SEMA4D    | 0.16 | 0.76397  | 0.962 |
| SLC22A15  | 0.16 | 0.76397  | 0.962 |
| SLC9A3R2  | 0.16 | 0.76397  | 0.962 |
| SLCO5A1   | 0.16 | 0.76397  | 0.962 |
| SPACA4    | 0.16 | 0.76397  | 0.962 |
| SPG11     | 0.16 | 0.76397  | 0.962 |
| STXBP1    | 0.16 | 0.76397  | 0.962 |
| TEX13B    | 0.16 | 0.76397  | 0.962 |
| TEX264    | 0.16 | 0.76397  | 0.962 |
| TM4SF4    | 0.16 | 0.76397  | 0.962 |
| TMC4      | 0.16 | 0.76397  | 0.962 |
| TPCN2     | 0.16 | 0.76397  | 0.962 |
| TRAPPC3L  | 0.16 | 0.76397  | 0.962 |
| TTC30B    | 0.16 | 0.763971 | 0.962 |
| TXNDC12   | 0.16 | 0.763971 | 0.962 |
| UGT1A1    | 0.16 | 0.763971 | 0.962 |
| USP25     | 0.16 | 0.76397  | 0.962 |
| WIPF1     | 0.16 | 0.76397  | 0.962 |
| WNT3      | 0.16 | 0.763971 | 0.962 |
| ZBTB49    | 0.16 | 0.76397  | 0.962 |
| ZC2HC1B   | 0.16 | 0.76397  | 0.962 |
| ZNF439    | 0.16 | 0.76397  | 0.962 |
| ZNF445    | 0.16 | 0.775458 | 0.965 |
| ZNF616    | 0.16 | 0.76397  | 0.962 |
| ZSWIM6    | 0.16 | 0.76397  | 0.962 |
| ABCA10    | 0.17 | 0.750509 | 0.961 |
| ADORA2A   | 0.17 | 0.762559 | 0.962 |
| AIPL1     | 0.17 | 0.750509 | 0.961 |
| ALDH3B1   | 0.17 | 0.750509 | 0.961 |
| AMIGO2    | 0.17 | 0.750509 | 0.961 |
| APOBEC3F  | 0.17 | 0.762559 | 0.962 |
| AQP1      | 0.17 | 0.750509 | 0.961 |
| ARF3      | 0.17 | 0.750509 | 0.961 |
| ARHGEF10L | 0.17 | 0.750509 | 0.961 |
| ASRGL1    | 0.17 | 0.750509 | 0.961 |
| ATP5G1    | 0.17 | 0.750509 | 0.961 |
| BZW1      | 0.17 | 0.750509 | 0.961 |
| C16orf91  | 0.17 | 0.750509 | 0.961 |

|           |      |          |       |
|-----------|------|----------|-------|
| C20orf141 | 0.17 | 0.750509 | 0.961 |
| C9orf135  | 0.17 | 0.750509 | 0.961 |
| CALCOCO2  | 0.17 | 0.750509 | 0.961 |
| CD300LG   | 0.17 | 0.750509 | 0.961 |
| CD93      | 0.17 | 0.750509 | 0.961 |
| CHRNA1    | 0.17 | 0.750509 | 0.961 |
| CIDEA     | 0.17 | 0.750509 | 0.961 |
| CKB       | 0.17 | 0.750509 | 0.961 |
| CLEC4E    | 0.17 | 0.750509 | 0.961 |
| CLECL1    | 0.17 | 0.750509 | 0.961 |
| CMBL      | 0.17 | 0.750509 | 0.961 |
| CNOT6     | 0.17 | 0.750509 | 0.961 |
| CYP2U1    | 0.17 | 0.750509 | 0.961 |
| CYP4F22   | 0.17 | 0.762559 | 0.962 |
| DAP       | 0.17 | 0.750509 | 0.961 |
| DBX1      | 0.17 | 0.762559 | 0.962 |
| DCTN5     | 0.17 | 0.76256  | 0.962 |
| DMC1      | 0.17 | 0.750509 | 0.961 |
| DPP4      | 0.17 | 0.750509 | 0.961 |
| DSG4      | 0.17 | 0.750509 | 0.961 |
| DUSP5     | 0.17 | 0.750509 | 0.961 |
| EMX2      | 0.17 | 0.750509 | 0.961 |
| ETV4      | 0.17 | 0.750509 | 0.961 |
| FAM178A   | 0.17 | 0.762559 | 0.962 |
| FAM57B    | 0.17 | 0.750509 | 0.961 |
| FCRL5     | 0.17 | 0.750509 | 0.961 |
| FGR       | 0.17 | 0.750509 | 0.961 |
| FNBP1     | 0.17 | 0.762559 | 0.962 |
| GOLGA7    | 0.17 | 0.750509 | 0.961 |
| GP6       | 0.17 | 0.76256  | 0.962 |
| GPATCH3   | 0.17 | 0.750509 | 0.961 |
| GSTA2     | 0.17 | 0.750509 | 0.961 |
| HEATR4    | 0.17 | 0.750509 | 0.961 |
| HIST1H2AB | 0.17 | 0.750509 | 0.961 |
| HIST1H2BI | 0.17 | 0.750509 | 0.961 |
| HRSP12    | 0.17 | 0.750509 | 0.961 |
| HSFY1     | 0.17 | 0.750509 | 0.961 |
| HSFY2     | 0.17 | 0.750509 | 0.961 |
| IGFN1     | 0.17 | 0.762559 | 0.962 |
| IK        | 0.17 | 0.750509 | 0.961 |
| IL4I1     | 0.17 | 0.750509 | 0.961 |
| KCNC1     | 0.17 | 0.762559 | 0.962 |
| KIF24     | 0.17 | 0.750509 | 0.961 |
| KRT28     | 0.17 | 0.750509 | 0.961 |
| LCN8      | 0.17 | 0.750509 | 0.961 |
| LRRC37A   | 0.17 | 0.750509 | 0.961 |
| LYPD5     | 0.17 | 0.750509 | 0.961 |

|          |      |          |       |
|----------|------|----------|-------|
| LZTS1    | 0.17 | 0.750509 | 0.961 |
| MBIP     | 0.17 | 0.750509 | 0.961 |
| MMP23B   | 0.17 | 0.750509 | 0.961 |
| MPL      | 0.17 | 0.750509 | 0.961 |
| MRPL53   | 0.17 | 0.750509 | 0.961 |
| MVB12A   | 0.17 | 0.750509 | 0.961 |
| MYL4     | 0.17 | 0.750509 | 0.961 |
| MYOZ2    | 0.17 | 0.750509 | 0.961 |
| MYZAP    | 0.17 | 0.750509 | 0.961 |
| NARFL    | 0.17 | 0.803516 | 0.971 |
| NBPF4    | 0.17 | 0.750509 | 0.961 |
| NIN      | 0.17 | 0.750509 | 0.961 |
| NRARP    | 0.17 | 0.750509 | 0.961 |
| NT5DC2   | 0.17 | 0.750509 | 0.961 |
| OPCML    | 0.17 | 0.750509 | 0.961 |
| OPN5     | 0.17 | 0.750509 | 0.961 |
| OR4F4    | 0.17 | 0.750509 | 0.961 |
| OR52N5   | 0.17 | 0.750509 | 0.961 |
| OR5H2    | 0.17 | 0.750509 | 0.961 |
| OSR2     | 0.17 | 0.750509 | 0.961 |
| OTOGL    | 0.17 | 0.750509 | 0.961 |
| PAGE2    | 0.17 | 0.750509 | 0.961 |
| PCDHGA1  | 0.17 | 0.750509 | 0.961 |
| PIAS1    | 0.17 | 0.750509 | 0.961 |
| PIEZO2   | 0.17 | 0.750509 | 0.961 |
| PIN1     | 0.17 | 0.750509 | 0.961 |
| PIWIL3   | 0.17 | 0.750509 | 0.961 |
| PKIB     | 0.17 | 0.750509 | 0.961 |
| PLCG1    | 0.17 | 0.750509 | 0.961 |
| POLR3E   | 0.17 | 0.750509 | 0.961 |
| POPDC2   | 0.17 | 0.750509 | 0.961 |
| PPFIA2   | 0.17 | 0.750509 | 0.961 |
| PPM1D    | 0.17 | 0.762559 | 0.962 |
| PRAP1    | 0.17 | 0.750509 | 0.961 |
| PRDX4    | 0.17 | 0.762559 | 0.962 |
| PRSS41   | 0.17 | 0.750509 | 0.961 |
| PSG1     | 0.17 | 0.750509 | 0.961 |
| PTCD3    | 0.17 | 0.750509 | 0.961 |
| REN      | 0.17 | 0.750509 | 0.961 |
| RGS18    | 0.17 | 0.750509 | 0.961 |
| SAAL1    | 0.17 | 0.775102 | 0.965 |
| SDC2     | 0.17 | 0.750509 | 0.961 |
| SEMA7A   | 0.17 | 0.750509 | 0.961 |
| SERPINB2 | 0.17 | 0.76256  | 0.962 |
| SERPINB8 | 0.17 | 0.750509 | 0.961 |
| SETMAR   | 0.17 | 0.76256  | 0.962 |
| SFTPB    | 0.17 | 0.750509 | 0.961 |

|          |      |          |       |
|----------|------|----------|-------|
| SH3RF3   | 0.17 | 0.750509 | 0.961 |
| SHROOM3  | 0.17 | 0.750509 | 0.961 |
| SIAH2    | 0.17 | 0.750509 | 0.961 |
| SIKE1    | 0.17 | 0.750509 | 0.961 |
| SLC17A2  | 0.17 | 0.750509 | 0.961 |
| SLC25A22 | 0.17 | 0.750509 | 0.961 |
| SLC31A1  | 0.17 | 0.750509 | 0.961 |
| SMAP1    | 0.17 | 0.750509 | 0.961 |
| SPANXA1  | 0.17 | 0.750509 | 0.961 |
| SPANXA2  | 0.17 | 0.750509 | 0.961 |
| ST3GAL1  | 0.17 | 0.762559 | 0.962 |
| ST7L     | 0.17 | 0.750509 | 0.961 |
| STAT1    | 0.17 | 0.750509 | 0.961 |
| STK17B   | 0.17 | 0.750509 | 0.961 |
| SUCLA2   | 0.17 | 0.76256  | 0.962 |
| TAAR9    | 0.17 | 0.750509 | 0.961 |
| TAF4     | 0.17 | 0.750509 | 0.961 |
| TAS2R43  | 0.17 | 0.762559 | 0.962 |
| TBCCD1   | 0.17 | 0.750509 | 0.961 |
| TBX19    | 0.17 | 0.750509 | 0.961 |
| THBS4    | 0.17 | 0.750509 | 0.961 |
| TMEM185B | 0.17 | 0.750509 | 0.961 |
| TMPO     | 0.17 | 0.750509 | 0.961 |
| TPRG1    | 0.17 | 0.750509 | 0.961 |
| TSPAN19  | 0.17 | 0.750509 | 0.961 |
| TTC19    | 0.17 | 0.750509 | 0.961 |
| UBXN11   | 0.17 | 0.750509 | 0.961 |
| UFM1     | 0.17 | 0.750509 | 0.961 |
| VCX2     | 0.17 | 0.750509 | 0.961 |
| WDR4     | 0.17 | 0.750509 | 0.961 |
| ZCCHC6   | 0.17 | 0.76256  | 0.962 |
| ZNF285   | 0.17 | 0.750509 | 0.961 |
| ADAMTS6  | 0.18 | 0.737201 | 0.961 |
| ALKBH4   | 0.18 | 0.737201 | 0.961 |
| ANKRD34A | 0.18 | 0.737201 | 0.961 |
| APBA3    | 0.18 | 0.737201 | 0.961 |
| ARG2     | 0.18 | 0.737201 | 0.961 |
| ARHGAP26 | 0.18 | 0.737201 | 0.961 |
| ASNS     | 0.18 | 0.737201 | 0.961 |
| ASTN1    | 0.18 | 0.749836 | 0.961 |
| BAIAP2L2 | 0.18 | 0.737201 | 0.961 |
| BCKDK    | 0.18 | 0.737201 | 0.961 |
| BCL2L1   | 0.18 | 0.737201 | 0.961 |
| BSN      | 0.18 | 0.737201 | 0.961 |
| C11orf86 | 0.18 | 0.737201 | 0.961 |
| C3orf83  | 0.18 | 0.737201 | 0.961 |
| C5AR2    | 0.18 | 0.737201 | 0.961 |

|           |      |          |       |
|-----------|------|----------|-------|
| C8orf82   | 0.18 | 0.763013 | 0.962 |
| CALM2     | 0.18 | 0.749836 | 0.961 |
| CCDC14    | 0.18 | 0.737201 | 0.961 |
| CCDC9     | 0.18 | 0.737201 | 0.961 |
| CD4       | 0.18 | 0.737201 | 0.961 |
| CDC34     | 0.18 | 0.737201 | 0.961 |
| CHRM1     | 0.18 | 0.749836 | 0.961 |
| CHSY1     | 0.18 | 0.737201 | 0.961 |
| CITED1    | 0.18 | 0.737201 | 0.961 |
| COL7A1    | 0.18 | 0.737201 | 0.961 |
| COQ2      | 0.18 | 0.737201 | 0.961 |
| CPT2      | 0.18 | 0.737201 | 0.961 |
| CT47B1    | 0.18 | 0.737201 | 0.961 |
| CYTH1     | 0.18 | 0.737201 | 0.961 |
| DUSP13    | 0.18 | 0.737201 | 0.961 |
| F2R       | 0.18 | 0.737201 | 0.961 |
| FAM25A    | 0.18 | 0.737201 | 0.961 |
| FAM25B    | 0.18 | 0.749836 | 0.961 |
| FAT4      | 0.18 | 0.737201 | 0.961 |
| FBXO33    | 0.18 | 0.737201 | 0.961 |
| FBXW12    | 0.18 | 0.737201 | 0.961 |
| FCGR3A    | 0.18 | 0.737201 | 0.961 |
| FCGR3B    | 0.18 | 0.737201 | 0.961 |
| FLYWCH2   | 0.18 | 0.737201 | 0.961 |
| FOXE3     | 0.18 | 0.737201 | 0.961 |
| FRMD3     | 0.18 | 0.737201 | 0.961 |
| FRMD6     | 0.18 | 0.737201 | 0.961 |
| FUCA2     | 0.18 | 0.737201 | 0.961 |
| GABRA4    | 0.18 | 0.737201 | 0.961 |
| GADD45GIP | 0.18 | 0.749835 | 0.961 |
| GALK1     | 0.18 | 0.737201 | 0.961 |
| GALR2     | 0.18 | 0.737201 | 0.961 |
| GBP3      | 0.18 | 0.737201 | 0.961 |
| GCOM1     | 0.18 | 0.737201 | 0.961 |
| GDI1      | 0.18 | 0.737201 | 0.961 |
| GLRX2     | 0.18 | 0.737201 | 0.961 |
| GRAMD3    | 0.18 | 0.737201 | 0.961 |
| GUCA2A    | 0.18 | 0.737201 | 0.961 |
| HARS2     | 0.18 | 0.749836 | 0.961 |
| HOPX      | 0.18 | 0.737201 | 0.961 |
| HSD17B14  | 0.18 | 0.737201 | 0.961 |
| HSPA1B    | 0.18 | 0.737201 | 0.961 |
| HTR3D     | 0.18 | 0.749836 | 0.961 |
| IGF2BP1   | 0.18 | 0.737201 | 0.961 |
| IKBIP     | 0.18 | 0.737201 | 0.961 |
| IQCC      | 0.18 | 0.749835 | 0.961 |
| ITPKB     | 0.18 | 0.749836 | 0.961 |

|          |      |          |       |
|----------|------|----------|-------|
| KAT5     | 0.18 | 0.763013 | 0.962 |
| KIAA1731 | 0.18 | 0.749836 | 0.961 |
| KIAA2018 | 0.18 | 0.737201 | 0.961 |
| LDHAL6A  | 0.18 | 0.737201 | 0.961 |
| LHFPL5   | 0.18 | 0.737201 | 0.961 |
| LOH12CR1 | 0.18 | 0.737201 | 0.961 |
| MAS1     | 0.18 | 0.737201 | 0.961 |
| MEOX1    | 0.18 | 0.763013 | 0.962 |
| MICAL1   | 0.18 | 0.737201 | 0.961 |
| MSGN1    | 0.18 | 0.737201 | 0.961 |
| NAIF1    | 0.18 | 0.737201 | 0.961 |
| NDNF     | 0.18 | 0.737201 | 0.961 |
| NDUFB2   | 0.18 | 0.737201 | 0.961 |
| NDUFC1   | 0.18 | 0.737201 | 0.961 |
| NT5C1A   | 0.18 | 0.737201 | 0.961 |
| NTPCR    | 0.18 | 0.737201 | 0.961 |
| NUF2     | 0.18 | 0.737201 | 0.961 |
| PCDH9    | 0.18 | 0.737201 | 0.961 |
| PFKFB2   | 0.18 | 0.737201 | 0.961 |
| PIGU     | 0.18 | 0.737201 | 0.961 |
| PLCH1    | 0.18 | 0.737201 | 0.961 |
| PNRC2    | 0.18 | 0.737201 | 0.961 |
| POLN     | 0.18 | 0.737201 | 0.961 |
| PPP2CB   | 0.18 | 0.737201 | 0.961 |
| RAD18    | 0.18 | 0.737201 | 0.961 |
| RASAL2   | 0.18 | 0.737201 | 0.961 |
| RFX8     | 0.18 | 0.737201 | 0.961 |
| RFXANK   | 0.18 | 0.749835 | 0.961 |
| RGSL1    | 0.18 | 0.737201 | 0.961 |
| SDCBP2   | 0.18 | 0.737201 | 0.961 |
| SGPP1    | 0.18 | 0.737201 | 0.961 |
| SIL1     | 0.18 | 0.737201 | 0.961 |
| SKOR2    | 0.18 | 0.737201 | 0.961 |
| SLC18A1  | 0.18 | 0.737201 | 0.961 |
| SLC27A6  | 0.18 | 0.737201 | 0.961 |
| SLC35A3  | 0.18 | 0.737201 | 0.961 |
| SLC5A11  | 0.18 | 0.737201 | 0.961 |
| SMC3     | 0.18 | 0.749835 | 0.961 |
| SORD     | 0.18 | 0.737201 | 0.961 |
| SSMEM1   | 0.18 | 0.737201 | 0.961 |
| STATH    | 0.18 | 0.749836 | 0.961 |
| TBC1D19  | 0.18 | 0.737201 | 0.961 |
| TBR1     | 0.18 | 0.737201 | 0.961 |
| TCTE3    | 0.18 | 0.749835 | 0.961 |
| TFAP2C   | 0.18 | 0.737201 | 0.961 |
| TMEM171  | 0.18 | 0.737201 | 0.961 |
| TMEM207  | 0.18 | 0.737201 | 0.961 |

|          |      |          |       |
|----------|------|----------|-------|
| TMEM30B  | 0.18 | 0.737201 | 0.961 |
| TMEM74   | 0.18 | 0.737201 | 0.961 |
| TMX4     | 0.18 | 0.737201 | 0.961 |
| TONSL    | 0.18 | 0.737201 | 0.961 |
| TPH1     | 0.18 | 0.737201 | 0.961 |
| TRMT10C  | 0.18 | 0.749835 | 0.961 |
| USP20    | 0.18 | 0.737201 | 0.961 |
| WISP3    | 0.18 | 0.737201 | 0.961 |
| XAGE3    | 0.18 | 0.737201 | 0.961 |
| YY2      | 0.18 | 0.737201 | 0.961 |
| ZC2HC1A  | 0.18 | 0.737201 | 0.961 |
| ZC3H10   | 0.18 | 0.737201 | 0.961 |
| ZNF420   | 0.18 | 0.737201 | 0.961 |
| ZNF500   | 0.18 | 0.737201 | 0.961 |
| AP4M1    | 0.19 | 0.723845 | 0.961 |
| AQP12A   | 0.19 | 0.782238 | 0.968 |
| ASIC2    | 0.19 | 0.723845 | 0.961 |
| ATP5A1   | 0.19 | 0.723845 | 0.961 |
| ATP5D    | 0.19 | 0.737134 | 0.961 |
| AUTS2    | 0.19 | 0.723845 | 0.961 |
| BCMO1    | 0.19 | 0.737134 | 0.961 |
| BEAN1    | 0.19 | 0.723845 | 0.961 |
| BRD9     | 0.19 | 0.723845 | 0.961 |
| BTN2A2   | 0.19 | 0.723845 | 0.961 |
| C11orf68 | 0.19 | 0.737134 | 0.961 |
| C12orf5  | 0.19 | 0.723845 | 0.961 |
| C1QTNF9B | 0.19 | 0.723845 | 0.961 |
| C2orf40  | 0.19 | 0.723845 | 0.961 |
| C4orf48  | 0.19 | 0.723845 | 0.961 |
| C6orf163 | 0.19 | 0.723846 | 0.961 |
| C6orf201 | 0.19 | 0.723845 | 0.961 |
| CALML3   | 0.19 | 0.723845 | 0.961 |
| CBX6     | 0.19 | 0.723846 | 0.961 |
| CD300A   | 0.19 | 0.723845 | 0.961 |
| CDR1     | 0.19 | 0.723845 | 0.961 |
| CFL2     | 0.19 | 0.737134 | 0.961 |
| CHN2     | 0.19 | 0.737134 | 0.961 |
| CHODL    | 0.19 | 0.723846 | 0.961 |
| CIB1     | 0.19 | 0.723846 | 0.961 |
| CSF1R    | 0.19 | 0.723845 | 0.961 |
| CUX2     | 0.19 | 0.750963 | 0.961 |
| DAK      | 0.19 | 0.723846 | 0.961 |
| DAW1     | 0.19 | 0.723845 | 0.961 |
| DDX60L   | 0.19 | 0.723845 | 0.961 |
| DEFB128  | 0.19 | 0.766211 | 0.964 |
| DOCK4    | 0.19 | 0.723845 | 0.961 |
| DOPEY1   | 0.19 | 0.723845 | 0.961 |

|           |      |          |       |
|-----------|------|----------|-------|
| DPYD      | 0.19 | 0.723845 | 0.961 |
| DRGX      | 0.19 | 0.750963 | 0.961 |
| EFCAB4A   | 0.19 | 0.723845 | 0.961 |
| EIF3B     | 0.19 | 0.766211 | 0.964 |
| FAAH      | 0.19 | 0.723846 | 0.961 |
| FAM210B   | 0.19 | 0.723846 | 0.961 |
| FAM90A1   | 0.19 | 0.723846 | 0.961 |
| FRMPD3    | 0.19 | 0.737134 | 0.961 |
| FYB       | 0.19 | 0.723845 | 0.961 |
| GABRB2    | 0.19 | 0.737134 | 0.961 |
| GABRG1    | 0.19 | 0.723845 | 0.961 |
| GAD1      | 0.19 | 0.723846 | 0.961 |
| GALP      | 0.19 | 0.737133 | 0.961 |
| GAN       | 0.19 | 0.723845 | 0.961 |
| GLIPR1L2  | 0.19 | 0.723845 | 0.961 |
| GPHN      | 0.19 | 0.737134 | 0.961 |
| GTF2A2    | 0.19 | 0.737134 | 0.961 |
| HCFC2     | 0.19 | 0.723845 | 0.961 |
| HIST1H2AA | 0.19 | 0.723845 | 0.961 |
| HNRNPH3   | 0.19 | 0.723846 | 0.961 |
| HPSE2     | 0.19 | 0.723846 | 0.961 |
| HSPB7     | 0.19 | 0.723845 | 0.961 |
| ICAM5     | 0.19 | 0.723846 | 0.961 |
| IFNA16    | 0.19 | 0.723846 | 0.961 |
| IL16      | 0.19 | 0.723846 | 0.961 |
| IL5RA     | 0.19 | 0.723845 | 0.961 |
| INO80D    | 0.19 | 0.723845 | 0.961 |
| IPO13     | 0.19 | 0.737133 | 0.961 |
| ISLR2     | 0.19 | 0.737134 | 0.961 |
| IZUMO1    | 0.19 | 0.723846 | 0.961 |
| KATNAL1   | 0.19 | 0.723845 | 0.961 |
| KLHL4     | 0.19 | 0.723845 | 0.961 |
| KLK15     | 0.19 | 0.723846 | 0.961 |
| KLRF1     | 0.19 | 0.723845 | 0.961 |
| KRT73     | 0.19 | 0.723845 | 0.961 |
| LRP6      | 0.19 | 0.723845 | 0.961 |
| LYPD6B    | 0.19 | 0.737134 | 0.961 |
| MAP2K7    | 0.19 | 0.737134 | 0.961 |
| MEIS3     | 0.19 | 0.723845 | 0.961 |
| MREG      | 0.19 | 0.723846 | 0.961 |
| MRPS36    | 0.19 | 0.750963 | 0.961 |
| MYH11     | 0.19 | 0.737133 | 0.961 |
| NDUFV1    | 0.19 | 0.750963 | 0.961 |
| NELFCD    | 0.19 | 0.723845 | 0.961 |
| NET1      | 0.19 | 0.723846 | 0.961 |
| NPS       | 0.19 | 0.723845 | 0.961 |
| NR2F2     | 0.19 | 0.723845 | 0.961 |

|           |      |          |       |
|-----------|------|----------|-------|
| NUDT7     | 0.19 | 0.723846 | 0.961 |
| OR2AG2    | 0.19 | 0.723845 | 0.961 |
| OR5B3     | 0.19 | 0.723845 | 0.961 |
| ORC6      | 0.19 | 0.750963 | 0.961 |
| PAQR3     | 0.19 | 0.723846 | 0.961 |
| PARP2     | 0.19 | 0.723846 | 0.961 |
| PCDHGA7   | 0.19 | 0.723845 | 0.961 |
| PDSS2     | 0.19 | 0.723845 | 0.961 |
| PET100    | 0.19 | 0.723845 | 0.961 |
| PHEX      | 0.19 | 0.723846 | 0.961 |
| PITPNC1   | 0.19 | 0.723845 | 0.961 |
| PKD1      | 0.19 | 0.723845 | 0.961 |
| PLD1      | 0.19 | 0.723845 | 0.961 |
| POGLUT1   | 0.19 | 0.723846 | 0.961 |
| PPAP2C    | 0.19 | 0.723845 | 0.961 |
| PPP5C     | 0.19 | 0.723846 | 0.961 |
| PRAMEF8   | 0.19 | 0.723846 | 0.961 |
| PREP      | 0.19 | 0.723845 | 0.961 |
| PRRT3     | 0.19 | 0.723845 | 0.961 |
| PSMD2     | 0.19 | 0.737134 | 0.961 |
| PTOV1     | 0.19 | 0.723845 | 0.961 |
| PTPN21    | 0.19 | 0.737134 | 0.961 |
| PTPRO     | 0.19 | 0.723846 | 0.961 |
| RC3H2     | 0.19 | 0.723846 | 0.961 |
| RETSAT    | 0.19 | 0.723846 | 0.961 |
| RHAG      | 0.19 | 0.723845 | 0.961 |
| RNASE6    | 0.19 | 0.723845 | 0.961 |
| RTBDN     | 0.19 | 0.723846 | 0.961 |
| SAE1      | 0.19 | 0.737134 | 0.961 |
| SASH1     | 0.19 | 0.723846 | 0.961 |
| SCRIB     | 0.19 | 0.737134 | 0.961 |
| SF3B1     | 0.19 | 0.723845 | 0.961 |
| SF3B14    | 0.19 | 0.723845 | 0.961 |
| SLC22A8   | 0.19 | 0.750963 | 0.961 |
| SLC24A3   | 0.19 | 0.723845 | 0.961 |
| SLC25A15  | 0.19 | 0.723845 | 0.961 |
| SLC29A3   | 0.19 | 0.723845 | 0.961 |
| SNX10     | 0.19 | 0.723846 | 0.961 |
| SRPK2     | 0.19 | 0.723846 | 0.961 |
| SULT1E1   | 0.19 | 0.723845 | 0.961 |
| SUPT20HL1 | 0.19 | 0.737134 | 0.961 |
| TBC1D2B   | 0.19 | 0.723846 | 0.961 |
| TEX11     | 0.19 | 0.723845 | 0.961 |
| TMEM134   | 0.19 | 0.723846 | 0.961 |
| TMEM158   | 0.19 | 0.723846 | 0.961 |
| TMSB4X    | 0.19 | 0.737134 | 0.961 |
| TNR       | 0.19 | 0.723846 | 0.961 |

|           |      |          |       |
|-----------|------|----------|-------|
| TOP1MT    | 0.19 | 0.723846 | 0.961 |
| TRIQK     | 0.19 | 0.750962 | 0.961 |
| TSEN54    | 0.19 | 0.737133 | 0.961 |
| TTC36     | 0.19 | 0.723845 | 0.961 |
| UBA52     | 0.19 | 0.737133 | 0.961 |
| UTP14A    | 0.19 | 0.737134 | 0.961 |
| WSCD2     | 0.19 | 0.737134 | 0.961 |
| ZNF556    | 0.19 | 0.723845 | 0.961 |
| ZNF793    | 0.19 | 0.723845 | 0.961 |
| AAMP      | 0.2  | 0.724555 | 0.961 |
| ACADS     | 0.2  | 0.710633 | 0.961 |
| ACTL7A    | 0.2  | 0.710633 | 0.961 |
| AKR1C4    | 0.2  | 0.710633 | 0.961 |
| ANKRD13B  | 0.2  | 0.710632 | 0.961 |
| ANKRD37   | 0.2  | 0.710633 | 0.961 |
| ANKRD9    | 0.2  | 0.710633 | 0.961 |
| ANO6      | 0.2  | 0.710633 | 0.961 |
| ARFGEF1   | 0.2  | 0.710633 | 0.961 |
| ARSH      | 0.2  | 0.710633 | 0.961 |
| ASB16     | 0.2  | 0.710633 | 0.961 |
| C11orf74  | 0.2  | 0.710633 | 0.961 |
| C12orf60  | 0.2  | 0.710633 | 0.961 |
| C1orf195  | 0.2  | 0.710633 | 0.961 |
| C20orf166 | 0.2  | 0.710632 | 0.961 |
| C7        | 0.2  | 0.710633 | 0.961 |
| C8orf87   | 0.2  | 0.710633 | 0.961 |
| CALB1     | 0.2  | 0.710632 | 0.961 |
| CARD17    | 0.2  | 0.724555 | 0.961 |
| CCNT1     | 0.2  | 0.710633 | 0.961 |
| CD7       | 0.2  | 0.710633 | 0.961 |
| CHMP1B    | 0.2  | 0.710633 | 0.961 |
| CIR1      | 0.2  | 0.710633 | 0.961 |
| CLCN6     | 0.2  | 0.710633 | 0.961 |
| CNTN1     | 0.2  | 0.710633 | 0.961 |
| COX14     | 0.2  | 0.724555 | 0.961 |
| CPN1      | 0.2  | 0.710632 | 0.961 |
| CREG2     | 0.2  | 0.710633 | 0.961 |
| DLC1      | 0.2  | 0.710633 | 0.961 |
| DLGAP1    | 0.2  | 0.710633 | 0.961 |
| ESCO1     | 0.2  | 0.710633 | 0.961 |
| FAM60A    | 0.2  | 0.710633 | 0.961 |
| FBXO24    | 0.2  | 0.710632 | 0.961 |
| FCGR2A    | 0.2  | 0.710633 | 0.961 |
| FEM1A     | 0.2  | 0.710633 | 0.961 |
| FNDC9     | 0.2  | 0.710633 | 0.961 |
| FOXO4     | 0.2  | 0.710633 | 0.961 |
| GEN1      | 0.2  | 0.710632 | 0.961 |

|            |     |          |       |
|------------|-----|----------|-------|
| GIGYF1     | 0.2 | 0.724555 | 0.961 |
| GNB4       | 0.2 | 0.710633 | 0.961 |
| GNE        | 0.2 | 0.710633 | 0.961 |
| GPR50      | 0.2 | 0.710632 | 0.961 |
| GRTP1      | 0.2 | 0.710632 | 0.961 |
| HECTD2     | 0.2 | 0.710633 | 0.961 |
| HENMT1     | 0.2 | 0.710632 | 0.961 |
| HES3       | 0.2 | 0.710633 | 0.961 |
| HIST1H2BL  | 0.2 | 0.738965 | 0.961 |
| HSPA1A     | 0.2 | 0.710633 | 0.961 |
| IFNK       | 0.2 | 0.710633 | 0.961 |
| IL12A      | 0.2 | 0.724555 | 0.961 |
| IL20       | 0.2 | 0.710633 | 0.961 |
| IL32       | 0.2 | 0.710632 | 0.961 |
| ITK        | 0.2 | 0.710633 | 0.961 |
| ITPKC      | 0.2 | 0.710633 | 0.961 |
| KIAA1191   | 0.2 | 0.710633 | 0.961 |
| KLHL33     | 0.2 | 0.710632 | 0.961 |
| KRT84      | 0.2 | 0.724555 | 0.961 |
| KRTAP10-1C | 0.2 | 0.724555 | 0.961 |
| LAX1       | 0.2 | 0.710632 | 0.961 |
| LCAT       | 0.2 | 0.710633 | 0.961 |
| LDHD       | 0.2 | 0.724555 | 0.961 |
| LRRD1      | 0.2 | 0.710633 | 0.961 |
| MALL       | 0.2 | 0.724555 | 0.961 |
| MARCKS     | 0.2 | 0.710633 | 0.961 |
| MCM10      | 0.2 | 0.710633 | 0.961 |
| MCOLN2     | 0.2 | 0.710633 | 0.961 |
| MDK        | 0.2 | 0.724555 | 0.961 |
| MRPS26     | 0.2 | 0.710633 | 0.961 |
| MYO18B     | 0.2 | 0.724555 | 0.961 |
| MYO1H      | 0.2 | 0.724555 | 0.961 |
| NADSYN1    | 0.2 | 0.710632 | 0.961 |
| NIPSNAP3B  | 0.2 | 0.710633 | 0.961 |
| NKIRAS2    | 0.2 | 0.710633 | 0.961 |
| NODAL      | 0.2 | 0.710632 | 0.961 |
| OR10AG1    | 0.2 | 0.710633 | 0.961 |
| OR1A1      | 0.2 | 0.710633 | 0.961 |
| OR52K1     | 0.2 | 0.710633 | 0.961 |
| OR5K4      | 0.2 | 0.710633 | 0.961 |
| OR6B1      | 0.2 | 0.710633 | 0.961 |
| OR6C75     | 0.2 | 0.710633 | 0.961 |
| OR6K2      | 0.2 | 0.738965 | 0.961 |
| OSBPL1A    | 0.2 | 0.710633 | 0.961 |
| PARP11     | 0.2 | 0.710633 | 0.961 |
| PDGFC      | 0.2 | 0.710633 | 0.961 |
| PILRA      | 0.2 | 0.724555 | 0.961 |

|            |      |          |       |
|------------|------|----------|-------|
| PPP4R4     | 0.2  | 0.710633 | 0.961 |
| PPY        | 0.2  | 0.710632 | 0.961 |
| PRH2       | 0.2  | 0.710633 | 0.961 |
| PRKACB     | 0.2  | 0.710633 | 0.961 |
| PRPF4B     | 0.2  | 0.724555 | 0.961 |
| PSD4       | 0.2  | 0.710633 | 0.961 |
| PSME1      | 0.2  | 0.710633 | 0.961 |
| RAB15      | 0.2  | 0.724555 | 0.961 |
| RAP2B      | 0.2  | 0.710633 | 0.961 |
| RFPL1      | 0.2  | 0.710633 | 0.961 |
| RIPK3      | 0.2  | 0.710633 | 0.961 |
| RPL37A     | 0.2  | 0.790068 | 0.968 |
| SAPCD2     | 0.2  | 0.710633 | 0.961 |
| SGK2       | 0.2  | 0.710633 | 0.961 |
| SKAP2      | 0.2  | 0.710633 | 0.961 |
| SLC2A11    | 0.2  | 0.710632 | 0.961 |
| SLC30A4    | 0.2  | 0.710633 | 0.961 |
| SLC7A13    | 0.2  | 0.710633 | 0.961 |
| SLITRK2    | 0.2  | 0.710632 | 0.961 |
| SNTB2      | 0.2  | 0.710633 | 0.961 |
| SNX14      | 0.2  | 0.710633 | 0.961 |
| SRY        | 0.2  | 0.724555 | 0.961 |
| TADA2B     | 0.2  | 0.710633 | 0.961 |
| TBC1D3H    | 0.2  | 0.710632 | 0.961 |
| TECTA      | 0.2  | 0.710633 | 0.961 |
| TMEM218    | 0.2  | 0.710633 | 0.961 |
| TNFRSF25   | 0.2  | 0.710633 | 0.961 |
| TP53       | 0.2  | 0.724555 | 0.961 |
| TRIM6      | 0.2  | 0.710633 | 0.961 |
| TRNP1      | 0.2  | 0.710633 | 0.961 |
| TTYH2      | 0.2  | 0.724555 | 0.961 |
| UBE2V1     | 0.2  | 0.710633 | 0.961 |
| UNC5CL     | 0.2  | 0.710633 | 0.961 |
| USP17L12   | 0.2  | 0.710633 | 0.961 |
| USP34      | 0.2  | 0.710633 | 0.961 |
| XYLT1      | 0.2  | 0.710633 | 0.961 |
| ZDHHC21    | 0.2  | 0.710633 | 0.961 |
| ZNF180     | 0.2  | 0.710633 | 0.961 |
| ZNF212     | 0.2  | 0.710633 | 0.961 |
| ZNF324B    | 0.2  | 0.710633 | 0.961 |
| ZNF441     | 0.2  | 0.710633 | 0.961 |
| ZNF449     | 0.2  | 0.710632 | 0.961 |
| ZNF782     | 0.2  | 0.710633 | 0.961 |
| ZNF816-ZNF | 0.2  | 0.710633 | 0.961 |
| ACOT13     | 0.21 | 0.697517 | 0.961 |
| ACTA2      | 0.21 | 0.697518 | 0.961 |
| ANKMY1     | 0.21 | 0.697517 | 0.961 |

|          |      |          |       |
|----------|------|----------|-------|
| ANKRD10  | 0.21 | 0.712078 | 0.961 |
| ARID3B   | 0.21 | 0.726968 | 0.961 |
| ARID3C   | 0.21 | 0.697518 | 0.961 |
| ARSJ     | 0.21 | 0.697517 | 0.961 |
| ATP11A   | 0.21 | 0.697517 | 0.961 |
| ATP1A1   | 0.21 | 0.712079 | 0.961 |
| ATRAID   | 0.21 | 0.697517 | 0.961 |
| BLVRB    | 0.21 | 0.697517 | 0.961 |
| BRX1     | 0.21 | 0.697518 | 0.961 |
| C2orf83  | 0.21 | 0.697518 | 0.961 |
| C5orf24  | 0.21 | 0.697518 | 0.961 |
| CAMSAP2  | 0.21 | 0.697517 | 0.961 |
| CAPN3    | 0.21 | 0.697518 | 0.961 |
| CCDC136  | 0.21 | 0.697517 | 0.961 |
| CCDC149  | 0.21 | 0.697517 | 0.961 |
| CD1A     | 0.21 | 0.697517 | 0.961 |
| CD300LF  | 0.21 | 0.697518 | 0.961 |
| CD40LG   | 0.21 | 0.697517 | 0.961 |
| CEACAM8  | 0.21 | 0.697518 | 0.961 |
| CENPB    | 0.21 | 0.697518 | 0.961 |
| CFHR1    | 0.21 | 0.697517 | 0.961 |
| CHUK     | 0.21 | 0.697517 | 0.961 |
| CLNS1A   | 0.21 | 0.697517 | 0.961 |
| COX7A1   | 0.21 | 0.697518 | 0.961 |
| COX8C    | 0.21 | 0.726968 | 0.961 |
| CTSD     | 0.21 | 0.712079 | 0.961 |
| CYLC2    | 0.21 | 0.697517 | 0.961 |
| DISP2    | 0.21 | 0.697518 | 0.961 |
| DNMT1    | 0.21 | 0.697517 | 0.961 |
| ENPP1    | 0.21 | 0.697517 | 0.961 |
| FADS2    | 0.21 | 0.712078 | 0.961 |
| FAM218A  | 0.21 | 0.697517 | 0.961 |
| FGFBP1   | 0.21 | 0.697517 | 0.961 |
| FOXD3    | 0.21 | 0.697517 | 0.961 |
| GPKOW    | 0.21 | 0.697517 | 0.961 |
| GREB1L   | 0.21 | 0.697517 | 0.961 |
| HES5     | 0.21 | 0.697517 | 0.961 |
| HINT1    | 0.21 | 0.697517 | 0.961 |
| HIST1H3I | 0.21 | 0.697517 | 0.961 |
| HIVEP1   | 0.21 | 0.712078 | 0.961 |
| HN1      | 0.21 | 0.697517 | 0.961 |
| HNF1A    | 0.21 | 0.697517 | 0.961 |
| HPCAL4   | 0.21 | 0.697517 | 0.961 |
| HTRA2    | 0.21 | 0.697517 | 0.961 |
| IDE      | 0.21 | 0.697517 | 0.961 |
| IFRD1    | 0.21 | 0.697518 | 0.961 |
| INPP1    | 0.21 | 0.697518 | 0.961 |

|           |      |          |       |
|-----------|------|----------|-------|
| ISCA2     | 0.21 | 0.712079 | 0.961 |
| ITGB1     | 0.21 | 0.697517 | 0.961 |
| IZUMO1R   | 0.21 | 0.697517 | 0.961 |
| KCNK16    | 0.21 | 0.697517 | 0.961 |
| KIF5B     | 0.21 | 0.697517 | 0.961 |
| KLRC2     | 0.21 | 0.697517 | 0.961 |
| KRTAP4-3  | 0.21 | 0.697517 | 0.961 |
| LDB1      | 0.21 | 0.697518 | 0.961 |
| LGALS13   | 0.21 | 0.697517 | 0.961 |
| LMBRD2    | 0.21 | 0.697517 | 0.961 |
| LMO2      | 0.21 | 0.697518 | 0.961 |
| MAFB      | 0.21 | 0.697517 | 0.961 |
| MAN1C1    | 0.21 | 0.712079 | 0.961 |
| MIEF2     | 0.21 | 0.697517 | 0.961 |
| MMP9      | 0.21 | 0.712079 | 0.961 |
| MOCOS     | 0.21 | 0.712079 | 0.961 |
| MRPL10    | 0.21 | 0.712078 | 0.961 |
| MRPL16    | 0.21 | 0.726968 | 0.961 |
| MTRNR2L1C | 0.21 | 0.726968 | 0.961 |
| MTRR      | 0.21 | 0.697517 | 0.961 |
| NAP1L4    | 0.21 | 0.697517 | 0.961 |
| NGF       | 0.21 | 0.712079 | 0.961 |
| NOC4L     | 0.21 | 0.697517 | 0.961 |
| NUP88     | 0.21 | 0.697518 | 0.961 |
| NXF1      | 0.21 | 0.743697 | 0.961 |
| OR1C1     | 0.21 | 0.712079 | 0.961 |
| OR2S2     | 0.21 | 0.697517 | 0.961 |
| OR4D5     | 0.21 | 0.697517 | 0.961 |
| OR5D16    | 0.21 | 0.697517 | 0.961 |
| OR8G2     | 0.21 | 0.697517 | 0.961 |
| PLCE1     | 0.21 | 0.697517 | 0.961 |
| PMPCB     | 0.21 | 0.697518 | 0.961 |
| POLDIP2   | 0.21 | 0.712078 | 0.961 |
| PPM1E     | 0.21 | 0.712078 | 0.961 |
| PPP1R36   | 0.21 | 0.697517 | 0.961 |
| PTPRJ     | 0.21 | 0.697517 | 0.961 |
| RABEP2    | 0.21 | 0.697518 | 0.961 |
| RABL5     | 0.21 | 0.697517 | 0.961 |
| RASSF6    | 0.21 | 0.697517 | 0.961 |
| RNMTL1    | 0.21 | 0.697517 | 0.961 |
| ROPN1L    | 0.21 | 0.697518 | 0.961 |
| SCRT1     | 0.21 | 0.712078 | 0.961 |
| SDR9C7    | 0.21 | 0.697517 | 0.961 |
| SIGLEC14  | 0.21 | 0.697517 | 0.961 |
| SLC43A1   | 0.21 | 0.697517 | 0.961 |
| SLC6A17   | 0.21 | 0.697517 | 0.961 |
| SP5       | 0.21 | 0.697517 | 0.961 |

|           |      |          |       |
|-----------|------|----------|-------|
| SRD5A2    | 0.21 | 0.697517 | 0.961 |
| SYK       | 0.21 | 0.697517 | 0.961 |
| SYNM      | 0.21 | 0.712079 | 0.961 |
| SYTL4     | 0.21 | 0.697518 | 0.961 |
| TAGAP     | 0.21 | 0.697517 | 0.961 |
| TES       | 0.21 | 0.697517 | 0.961 |
| THEM6     | 0.21 | 0.697517 | 0.961 |
| TIMELESS  | 0.21 | 0.726969 | 0.961 |
| TLR9      | 0.21 | 0.712079 | 0.961 |
| TRAF3IP1  | 0.21 | 0.712079 | 0.961 |
| TSSK6     | 0.21 | 0.697517 | 0.961 |
| TTLL10    | 0.21 | 0.712079 | 0.961 |
| TWF2      | 0.21 | 0.697517 | 0.961 |
| UQCRC2    | 0.21 | 0.726969 | 0.961 |
| USH1C     | 0.21 | 0.697517 | 0.961 |
| USP12     | 0.21 | 0.697517 | 0.961 |
| UTP3      | 0.21 | 0.697517 | 0.961 |
| VCAM1     | 0.21 | 0.697517 | 0.961 |
| VWA3B     | 0.21 | 0.697517 | 0.961 |
| WIPF2     | 0.21 | 0.697517 | 0.961 |
| WNT5A     | 0.21 | 0.697517 | 0.961 |
| XYLT2     | 0.21 | 0.712079 | 0.961 |
| YIPF1     | 0.21 | 0.697517 | 0.961 |
| ZMYND19   | 0.21 | 0.697517 | 0.961 |
| ZNF101    | 0.21 | 0.697517 | 0.961 |
| ZNF256    | 0.21 | 0.697517 | 0.961 |
| ZNF596    | 0.21 | 0.697517 | 0.961 |
| ZNF677    | 0.21 | 0.697517 | 0.961 |
| ZNF771    | 0.21 | 0.726969 | 0.961 |
| AGAP3     | 0.22 | 0.684515 | 0.961 |
| AGMAT     | 0.22 | 0.684514 | 0.961 |
| AGO1      | 0.22 | 0.684514 | 0.961 |
| ANO9      | 0.22 | 0.684514 | 0.961 |
| AP3M1     | 0.22 | 0.684514 | 0.961 |
| APC       | 0.22 | 0.684514 | 0.961 |
| ASCL5     | 0.22 | 0.699628 | 0.961 |
| ASMT      | 0.22 | 0.684514 | 0.961 |
| B9D1      | 0.22 | 0.684515 | 0.961 |
| BAIAP3    | 0.22 | 0.684515 | 0.961 |
| C14orf142 | 0.22 | 0.684514 | 0.961 |
| C14orf39  | 0.22 | 0.684515 | 0.961 |
| C2orf50   | 0.22 | 0.699627 | 0.961 |
| C5orf58   | 0.22 | 0.699627 | 0.961 |
| C7orf50   | 0.22 | 0.699627 | 0.961 |
| CCDC129   | 0.22 | 0.684515 | 0.961 |
| CCDC159   | 0.22 | 0.699627 | 0.961 |
| CCDC175   | 0.22 | 0.684514 | 0.961 |

|          |      |          |       |
|----------|------|----------|-------|
| CCDC51   | 0.22 | 0.684514 | 0.961 |
| CCT5     | 0.22 | 0.732344 | 0.961 |
| CD22     | 0.22 | 0.715119 | 0.961 |
| CD84     | 0.22 | 0.684514 | 0.961 |
| CDKN1A   | 0.22 | 0.684514 | 0.961 |
| CHFR     | 0.22 | 0.684514 | 0.961 |
| CHRNA    | 0.22 | 0.699627 | 0.961 |
| CLDN2    | 0.22 | 0.684515 | 0.961 |
| CNKSR3   | 0.22 | 0.684514 | 0.961 |
| CNNM4    | 0.22 | 0.684515 | 0.961 |
| CPS1     | 0.22 | 0.684515 | 0.961 |
| CRYGN    | 0.22 | 0.699627 | 0.961 |
| CSDE1    | 0.22 | 0.684515 | 0.961 |
| CSH2     | 0.22 | 0.684514 | 0.961 |
| CXorf36  | 0.22 | 0.684514 | 0.961 |
| CXorf56  | 0.22 | 0.699627 | 0.961 |
| DHX30    | 0.22 | 0.699628 | 0.961 |
| DNAJC5G  | 0.22 | 0.684514 | 0.961 |
| EBF4     | 0.22 | 0.684515 | 0.961 |
| EPHB6    | 0.22 | 0.684514 | 0.961 |
| EPYC     | 0.22 | 0.699627 | 0.961 |
| FAM161B  | 0.22 | 0.684514 | 0.961 |
| FAM86B2  | 0.22 | 0.684514 | 0.961 |
| FAM98A   | 0.22 | 0.684515 | 0.961 |
| FBXO34   | 0.22 | 0.684514 | 0.961 |
| FTCD     | 0.22 | 0.699627 | 0.961 |
| G6PD     | 0.22 | 0.684515 | 0.961 |
| GALNT9   | 0.22 | 0.684514 | 0.961 |
| GCSH     | 0.22 | 0.684514 | 0.961 |
| GDPD5    | 0.22 | 0.684514 | 0.961 |
| GRN      | 0.22 | 0.684515 | 0.961 |
| HIP1R    | 0.22 | 0.684514 | 0.961 |
| HIST1H4E | 0.22 | 0.684514 | 0.961 |
| HOXD11   | 0.22 | 0.684514 | 0.961 |
| IFNA2    | 0.22 | 0.684514 | 0.961 |
| IFNA7    | 0.22 | 0.684515 | 0.961 |
| IFT74    | 0.22 | 0.699627 | 0.961 |
| IL22RA1  | 0.22 | 0.699628 | 0.961 |
| IMP3     | 0.22 | 0.732344 | 0.961 |
| INSL6    | 0.22 | 0.684514 | 0.961 |
| IQUB     | 0.22 | 0.684514 | 0.961 |
| ITIH2    | 0.22 | 0.684514 | 0.961 |
| KCNJ13   | 0.22 | 0.684514 | 0.961 |
| KIAA0226 | 0.22 | 0.699627 | 0.961 |
| KIAA0408 | 0.22 | 0.684514 | 0.961 |
| KIAA1324 | 0.22 | 0.699627 | 0.961 |
| LARP4B   | 0.22 | 0.684515 | 0.961 |

|          |      |          |       |
|----------|------|----------|-------|
| LARP7    | 0.22 | 0.684515 | 0.961 |
| LRRC17   | 0.22 | 0.684515 | 0.961 |
| LYG1     | 0.22 | 0.684514 | 0.961 |
| MAGEA4   | 0.22 | 0.684515 | 0.961 |
| MAGEC1   | 0.22 | 0.684515 | 0.961 |
| MAP1LC3A | 0.22 | 0.699628 | 0.961 |
| MDH1B    | 0.22 | 0.684514 | 0.961 |
| MSLN     | 0.22 | 0.684515 | 0.961 |
| MYH13    | 0.22 | 0.715119 | 0.961 |
| NAP1L3   | 0.22 | 0.684514 | 0.961 |
| NAT14    | 0.22 | 0.684515 | 0.961 |
| NEK2     | 0.22 | 0.684515 | 0.961 |
| NELL1    | 0.22 | 0.684514 | 0.961 |
| OR1E1    | 0.22 | 0.684514 | 0.961 |
| OR5AK2   | 0.22 | 0.684514 | 0.961 |
| P4HA2    | 0.22 | 0.684514 | 0.961 |
| PARP12   | 0.22 | 0.684514 | 0.961 |
| PAX6     | 0.22 | 0.684514 | 0.961 |
| PHF21A   | 0.22 | 0.684515 | 0.961 |
| PITX1    | 0.22 | 0.684514 | 0.961 |
| PLA2R1   | 0.22 | 0.684514 | 0.961 |
| PLAC9    | 0.22 | 0.684515 | 0.961 |
| PLTP     | 0.22 | 0.684514 | 0.961 |
| POC5     | 0.22 | 0.684515 | 0.961 |
| POTEG    | 0.22 | 0.684514 | 0.961 |
| RAI14    | 0.22 | 0.684514 | 0.961 |
| RGPD1    | 0.22 | 0.684514 | 0.961 |
| RGS5     | 0.22 | 0.684515 | 0.961 |
| RNF121   | 0.22 | 0.715119 | 0.961 |
| RNF139   | 0.22 | 0.684515 | 0.961 |
| RPS15    | 0.22 | 0.715119 | 0.961 |
| RPUSD2   | 0.22 | 0.684514 | 0.961 |
| SAA1     | 0.22 | 0.684514 | 0.961 |
| SFTPC    | 0.22 | 0.684514 | 0.961 |
| SHE      | 0.22 | 0.684514 | 0.961 |
| SLC35D3  | 0.22 | 0.684515 | 0.961 |
| SLC35F5  | 0.22 | 0.684515 | 0.961 |
| SLC44A5  | 0.22 | 0.684515 | 0.961 |
| SLITRK4  | 0.22 | 0.684514 | 0.961 |
| SMC1A    | 0.22 | 0.715119 | 0.961 |
| SNTB1    | 0.22 | 0.684515 | 0.961 |
| SPANXN4  | 0.22 | 0.684515 | 0.961 |
| SPATA25  | 0.22 | 0.684514 | 0.961 |
| SSX4     | 0.22 | 0.684514 | 0.961 |
| SSX4B    | 0.22 | 0.684514 | 0.961 |
| SULT1C2  | 0.22 | 0.699627 | 0.961 |
| SUN2     | 0.22 | 0.699627 | 0.961 |

|          |      |          |       |
|----------|------|----------|-------|
| SUSD4    | 0.22 | 0.684514 | 0.961 |
| SYN2     | 0.22 | 0.684515 | 0.961 |
| SYT14    | 0.22 | 0.684514 | 0.961 |
| TADA3    | 0.22 | 0.699627 | 0.961 |
| TMEM204  | 0.22 | 0.684514 | 0.961 |
| TNKS1BP1 | 0.22 | 0.699627 | 0.961 |
| TRIP6    | 0.22 | 0.684514 | 0.961 |
| TRMT1    | 0.22 | 0.684514 | 0.961 |
| TXN2     | 0.22 | 0.684514 | 0.961 |
| TYW1B    | 0.22 | 0.684514 | 0.961 |
| UCP1     | 0.22 | 0.684515 | 0.961 |
| VAMP4    | 0.22 | 0.684515 | 0.961 |
| WWTR1    | 0.22 | 0.684514 | 0.961 |
| ZMYND15  | 0.22 | 0.684515 | 0.961 |
| ZNF331   | 0.22 | 0.684514 | 0.961 |
| ZNF366   | 0.22 | 0.684514 | 0.961 |
| ZNF469   | 0.22 | 0.684514 | 0.961 |
| ZNRF3    | 0.22 | 0.684514 | 0.961 |
| ZSWIM2   | 0.22 | 0.684514 | 0.961 |
| AMN1     | 0.23 | 0.671565 | 0.961 |
| ANO7     | 0.23 | 0.671565 | 0.961 |
| AOX1     | 0.23 | 0.671565 | 0.961 |
| ARPC4    | 0.23 | 0.671565 | 0.961 |
| C18orf25 | 0.23 | 0.671565 | 0.961 |
| C2orf61  | 0.23 | 0.687233 | 0.961 |
| C5orf66  | 0.23 | 0.671565 | 0.961 |
| C8orf34  | 0.23 | 0.671565 | 0.961 |
| CACNA1I  | 0.23 | 0.687232 | 0.961 |
| CALHM1   | 0.23 | 0.671565 | 0.961 |
| CCBL1    | 0.23 | 0.687233 | 0.961 |
| CCDC79   | 0.23 | 0.671565 | 0.961 |
| CCL7     | 0.23 | 0.671565 | 0.961 |
| CDC42BPA | 0.23 | 0.671565 | 0.961 |
| CDPF1    | 0.23 | 0.671565 | 0.961 |
| CHST3    | 0.23 | 0.671565 | 0.961 |
| CIB3     | 0.23 | 0.671565 | 0.961 |
| CRISPLD2 | 0.23 | 0.671565 | 0.961 |
| CRNKL1   | 0.23 | 0.671565 | 0.961 |
| CRYZ     | 0.23 | 0.671565 | 0.961 |
| CYFIP1   | 0.23 | 0.671565 | 0.961 |
| CYFIP2   | 0.23 | 0.671565 | 0.961 |
| CYP17A1  | 0.23 | 0.671565 | 0.961 |
| DAD1     | 0.23 | 0.687233 | 0.961 |
| DCK      | 0.23 | 0.671565 | 0.961 |
| DDIT4L   | 0.23 | 0.671565 | 0.961 |
| DHX33    | 0.23 | 0.703417 | 0.961 |
| EDN2     | 0.23 | 0.687233 | 0.961 |

|           |      |          |       |
|-----------|------|----------|-------|
| EIF2B5    | 0.23 | 0.687233 | 0.961 |
| FAN1      | 0.23 | 0.671565 | 0.961 |
| FARS2     | 0.23 | 0.671565 | 0.961 |
| FBLN5     | 0.23 | 0.671565 | 0.961 |
| FBXO32    | 0.23 | 0.671565 | 0.961 |
| GALNT16   | 0.23 | 0.671565 | 0.961 |
| GIPC3     | 0.23 | 0.671565 | 0.961 |
| GLDN      | 0.23 | 0.671565 | 0.961 |
| GLUD1     | 0.23 | 0.671565 | 0.961 |
| GPR157    | 0.23 | 0.687233 | 0.961 |
| GRK7      | 0.23 | 0.671565 | 0.961 |
| GRP       | 0.23 | 0.671565 | 0.961 |
| GSC       | 0.23 | 0.671565 | 0.961 |
| GSTM5     | 0.23 | 0.671565 | 0.961 |
| HES7      | 0.23 | 0.671565 | 0.961 |
| HIC2      | 0.23 | 0.671565 | 0.961 |
| HOGA1     | 0.23 | 0.687233 | 0.961 |
| HS6ST1    | 0.23 | 0.671565 | 0.961 |
| HSPG2     | 0.23 | 0.671565 | 0.961 |
| IFI6      | 0.23 | 0.671565 | 0.961 |
| IFITM3    | 0.23 | 0.687233 | 0.961 |
| IL17A     | 0.23 | 0.671565 | 0.961 |
| IL5       | 0.23 | 0.671565 | 0.961 |
| INPP5J    | 0.23 | 0.671565 | 0.961 |
| JUND      | 0.23 | 0.671565 | 0.961 |
| KAT7      | 0.23 | 0.671565 | 0.961 |
| KCNJ14    | 0.23 | 0.671565 | 0.961 |
| KCNMB1    | 0.23 | 0.671565 | 0.961 |
| KCNN3     | 0.23 | 0.671565 | 0.961 |
| KCNS3     | 0.23 | 0.671565 | 0.961 |
| KDM4C     | 0.23 | 0.671565 | 0.961 |
| KLC3      | 0.23 | 0.687232 | 0.961 |
| KLHL38    | 0.23 | 0.671565 | 0.961 |
| KRTAP12-4 | 0.23 | 0.671565 | 0.961 |
| KRTAP1-3  | 0.23 | 0.687233 | 0.961 |
| KRTAP21-1 | 0.23 | 0.671565 | 0.961 |
| LARGE     | 0.23 | 0.687233 | 0.961 |
| LCN6      | 0.23 | 0.671565 | 0.961 |
| LIMA1     | 0.23 | 0.671565 | 0.961 |
| LRRC4B    | 0.23 | 0.671565 | 0.961 |
| LRRC74B   | 0.23 | 0.703417 | 0.961 |
| LY6G6D    | 0.23 | 0.671565 | 0.961 |
| LYRM2     | 0.23 | 0.687233 | 0.961 |
| MFHAS1    | 0.23 | 0.671565 | 0.961 |
| MFN1      | 0.23 | 0.671565 | 0.961 |
| MGAM      | 0.23 | 0.671565 | 0.961 |
| MGAM2     | 0.23 | 0.671565 | 0.961 |

|          |      |          |       |
|----------|------|----------|-------|
| MICU3    | 0.23 | 0.671565 | 0.961 |
| MOGAT2   | 0.23 | 0.671565 | 0.961 |
| MSRB1    | 0.23 | 0.671565 | 0.961 |
| MYO15B   | 0.23 | 0.671565 | 0.961 |
| NDUFA8   | 0.23 | 0.671565 | 0.961 |
| NHLRC1   | 0.23 | 0.671565 | 0.961 |
| NLRP8    | 0.23 | 0.671565 | 0.961 |
| NUPR1    | 0.23 | 0.687233 | 0.961 |
| OR13D1   | 0.23 | 0.671565 | 0.961 |
| PAFAH1B2 | 0.23 | 0.687233 | 0.961 |
| PLEKHG4  | 0.23 | 0.671565 | 0.961 |
| PLEKHG7  | 0.23 | 0.671565 | 0.961 |
| POLE2    | 0.23 | 0.721219 | 0.961 |
| PTP4A1   | 0.23 | 0.671565 | 0.961 |
| PWWP2A   | 0.23 | 0.671565 | 0.961 |
| RASSF9   | 0.23 | 0.671565 | 0.961 |
| RGS9BP   | 0.23 | 0.671565 | 0.961 |
| RNF5     | 0.23 | 0.671565 | 0.961 |
| RSF1     | 0.23 | 0.687233 | 0.961 |
| RSPH1    | 0.23 | 0.671565 | 0.961 |
| SCN2A    | 0.23 | 0.671565 | 0.961 |
| SEH1L    | 0.23 | 0.671565 | 0.961 |
| SEMA6B   | 0.23 | 0.671565 | 0.961 |
| SERPINF1 | 0.23 | 0.687233 | 0.961 |
| SKIDA1   | 0.23 | 0.671565 | 0.961 |
| SLC38A2  | 0.23 | 0.671565 | 0.961 |
| SSX2     | 0.23 | 0.671565 | 0.961 |
| SSX2B    | 0.23 | 0.671565 | 0.961 |
| STT3B    | 0.23 | 0.671565 | 0.961 |
| SUPT6H   | 0.23 | 0.687233 | 0.961 |
| SUPT7L   | 0.23 | 0.671565 | 0.961 |
| SYTL2    | 0.23 | 0.671565 | 0.961 |
| TAPBP    | 0.23 | 0.671565 | 0.961 |
| TAX1BP3  | 0.23 | 0.671565 | 0.961 |
| TLDC2    | 0.23 | 0.671565 | 0.961 |
| TMED5    | 0.23 | 0.671565 | 0.961 |
| TMEM43   | 0.23 | 0.671565 | 0.961 |
| TNFSF9   | 0.23 | 0.671565 | 0.961 |
| TP53I11  | 0.23 | 0.671565 | 0.961 |
| TRIM73   | 0.23 | 0.687233 | 0.961 |
| UTP18    | 0.23 | 0.687233 | 0.961 |
| VCX      | 0.23 | 0.671565 | 0.961 |
| WDFY3    | 0.23 | 0.671565 | 0.961 |
| WWC1     | 0.23 | 0.671565 | 0.961 |
| XRN1     | 0.23 | 0.671565 | 0.961 |
| ZKSCAN2  | 0.23 | 0.671565 | 0.961 |
| AGAP2    | 0.24 | 0.658714 | 0.958 |

|           |      |          |       |
|-----------|------|----------|-------|
| AKR1B10   | 0.24 | 0.658715 | 0.958 |
| ANO8      | 0.24 | 0.658715 | 0.958 |
| ARHGAP11/ | 0.24 | 0.658714 | 0.958 |
| ARHGEF37  | 0.24 | 0.658714 | 0.958 |
| ATXN2     | 0.24 | 0.658714 | 0.958 |
| C14orf178 | 0.24 | 0.658714 | 0.958 |
| CALHM2    | 0.24 | 0.674938 | 0.961 |
| CCDC105   | 0.24 | 0.658715 | 0.958 |
| CD164L2   | 0.24 | 0.658714 | 0.958 |
| CHTOP     | 0.24 | 0.658714 | 0.958 |
| CLCNKB    | 0.24 | 0.658714 | 0.958 |
| COMMD6    | 0.24 | 0.658714 | 0.958 |
| DDX41     | 0.24 | 0.658714 | 0.958 |
| DEFB114   | 0.24 | 0.729558 | 0.961 |
| DOC2B     | 0.24 | 0.658715 | 0.958 |
| EMILIN1   | 0.24 | 0.674938 | 0.961 |
| EMILIN2   | 0.24 | 0.658714 | 0.958 |
| ETAA1     | 0.24 | 0.658714 | 0.958 |
| FAM19A4   | 0.24 | 0.658714 | 0.958 |
| FAM86C1   | 0.24 | 0.658714 | 0.958 |
| FAM8A1    | 0.24 | 0.674938 | 0.961 |
| FREM3     | 0.24 | 0.658714 | 0.958 |
| FUT8      | 0.24 | 0.658714 | 0.958 |
| GAA       | 0.24 | 0.658715 | 0.958 |
| GJB4      | 0.24 | 0.658714 | 0.958 |
| GPX7      | 0.24 | 0.658714 | 0.958 |
| GRSF1     | 0.24 | 0.658714 | 0.958 |
| GRXCR2    | 0.24 | 0.674938 | 0.961 |
| HS3ST3B1  | 0.24 | 0.674938 | 0.961 |
| HTR6      | 0.24 | 0.658715 | 0.958 |
| IQCD      | 0.24 | 0.658714 | 0.958 |
| KIAA1024L | 0.24 | 0.658714 | 0.958 |
| KRCC1     | 0.24 | 0.658714 | 0.958 |
| KRT20     | 0.24 | 0.658714 | 0.958 |
| KRTAP4-4  | 0.24 | 0.674939 | 0.961 |
| LAMTOR3   | 0.24 | 0.658715 | 0.958 |
| LCTL      | 0.24 | 0.658714 | 0.958 |
| MAD2L2    | 0.24 | 0.658714 | 0.958 |
| MAFG      | 0.24 | 0.674939 | 0.961 |
| MCM2      | 0.24 | 0.710172 | 0.961 |
| MED19     | 0.24 | 0.674938 | 0.961 |
| MMP7      | 0.24 | 0.658715 | 0.958 |
| MPG       | 0.24 | 0.658715 | 0.958 |
| MR1       | 0.24 | 0.658714 | 0.958 |
| MTRF1L    | 0.24 | 0.658714 | 0.958 |
| MYLPF     | 0.24 | 0.658714 | 0.958 |
| NIPAL2    | 0.24 | 0.658714 | 0.958 |

|          |      |          |       |
|----------|------|----------|-------|
| NMS      | 0.24 | 0.658714 | 0.958 |
| NOL8     | 0.24 | 0.658714 | 0.958 |
| NPIPB5   | 0.24 | 0.658714 | 0.958 |
| NRDE2    | 0.24 | 0.674938 | 0.961 |
| OR10C1   | 0.24 | 0.658714 | 0.958 |
| OR13J1   | 0.24 | 0.658715 | 0.958 |
| OR2H1    | 0.24 | 0.658714 | 0.958 |
| OR2T8    | 0.24 | 0.658714 | 0.958 |
| OTUD4    | 0.24 | 0.658714 | 0.958 |
| PARD6A   | 0.24 | 0.674938 | 0.961 |
| PDIA5    | 0.24 | 0.658715 | 0.958 |
| PHKA2    | 0.24 | 0.658714 | 0.958 |
| PKDCC    | 0.24 | 0.658715 | 0.958 |
| PPP1R13B | 0.24 | 0.658715 | 0.958 |
| PPP2R1B  | 0.24 | 0.658714 | 0.958 |
| PRAMEF7  | 0.24 | 0.658714 | 0.958 |
| PTGR1    | 0.24 | 0.658714 | 0.958 |
| RHCG     | 0.24 | 0.658714 | 0.958 |
| RHNO1    | 0.24 | 0.658714 | 0.958 |
| RHOT2    | 0.24 | 0.658714 | 0.958 |
| RNGTT    | 0.24 | 0.691671 | 0.961 |
| RPS27L   | 0.24 | 0.658714 | 0.958 |
| RPS4Y1   | 0.24 | 0.658714 | 0.958 |
| SDC3     | 0.24 | 0.658714 | 0.958 |
| SEC14L2  | 0.24 | 0.658715 | 0.958 |
| SH3BGRL  | 0.24 | 0.658714 | 0.958 |
| SIMC1    | 0.24 | 0.69167  | 0.961 |
| SLC13A1  | 0.24 | 0.658714 | 0.958 |
| SLC36A3  | 0.24 | 0.658715 | 0.958 |
| SNRNP27  | 0.24 | 0.658714 | 0.958 |
| SPATA16  | 0.24 | 0.658715 | 0.958 |
| SPZ1     | 0.24 | 0.674938 | 0.961 |
| SYNDIG1  | 0.24 | 0.658714 | 0.958 |
| TBXAS1   | 0.24 | 0.658714 | 0.958 |
| TCP10L   | 0.24 | 0.658714 | 0.958 |
| TDRD1    | 0.24 | 0.658714 | 0.958 |
| TENC1    | 0.24 | 0.69167  | 0.961 |
| TENM2    | 0.24 | 0.658714 | 0.958 |
| TIGD4    | 0.24 | 0.658714 | 0.958 |
| TMCO1    | 0.24 | 0.658714 | 0.958 |
| TNFRSF1B | 0.24 | 0.658715 | 0.958 |
| TRIM63   | 0.24 | 0.658714 | 0.958 |
| TUBE1    | 0.24 | 0.658714 | 0.958 |
| VAR2     | 0.24 | 0.658714 | 0.958 |
| VTA1     | 0.24 | 0.658714 | 0.958 |
| ZBTB2    | 0.24 | 0.674938 | 0.961 |
| ZBTB4    | 0.24 | 0.69167  | 0.961 |

|            |      |          |       |
|------------|------|----------|-------|
| ZG16B      | 0.24 | 0.658715 | 0.958 |
| ZNF804A    | 0.24 | 0.658714 | 0.958 |
| ABCA13     | 0.25 | 0.645965 | 0.954 |
| ALAS2      | 0.25 | 0.645965 | 0.954 |
| ALPPL2     | 0.25 | 0.645966 | 0.954 |
| APOL3      | 0.25 | 0.645965 | 0.954 |
| ATP6V0E2   | 0.25 | 0.645965 | 0.954 |
| B2M        | 0.25 | 0.645965 | 0.954 |
| BTBD2      | 0.25 | 0.645965 | 0.954 |
| C16orf95   | 0.25 | 0.645965 | 0.954 |
| CACNG7     | 0.25 | 0.645966 | 0.954 |
| CAMK1      | 0.25 | 0.645966 | 0.954 |
| CBX4       | 0.25 | 0.645965 | 0.954 |
| CCDC108    | 0.25 | 0.645965 | 0.954 |
| CCDC30     | 0.25 | 0.66268  | 0.961 |
| COPS7B     | 0.25 | 0.645965 | 0.954 |
| CPM        | 0.25 | 0.645965 | 0.954 |
| CXCR3      | 0.25 | 0.645966 | 0.954 |
| DDX60      | 0.25 | 0.645966 | 0.954 |
| DEFA6      | 0.25 | 0.645965 | 0.954 |
| DHRS2      | 0.25 | 0.645965 | 0.954 |
| EPHB2      | 0.25 | 0.645965 | 0.954 |
| ERCC4      | 0.25 | 0.66268  | 0.961 |
| FAM186A    | 0.25 | 0.66268  | 0.961 |
| FAP        | 0.25 | 0.645966 | 0.954 |
| FBXL8      | 0.25 | 0.645965 | 0.954 |
| FMO2       | 0.25 | 0.662679 | 0.961 |
| HDC        | 0.25 | 0.645965 | 0.954 |
| HTR1D      | 0.25 | 0.645966 | 0.954 |
| IFI27L1    | 0.25 | 0.645965 | 0.954 |
| IFT140     | 0.25 | 0.645966 | 0.954 |
| INPP4A     | 0.25 | 0.645965 | 0.954 |
| KCNIP2     | 0.25 | 0.645965 | 0.954 |
| KDELC1     | 0.25 | 0.645966 | 0.954 |
| KLF12      | 0.25 | 0.645965 | 0.954 |
| KLK13      | 0.25 | 0.645965 | 0.954 |
| KNSTRN     | 0.25 | 0.645966 | 0.954 |
| KRTAP10-12 | 0.25 | 0.66268  | 0.961 |
| LAMP5      | 0.25 | 0.645965 | 0.954 |
| LDLRAD2    | 0.25 | 0.645965 | 0.954 |
| LIN52      | 0.25 | 0.645965 | 0.954 |
| LIPF       | 0.25 | 0.645965 | 0.954 |
| LOC728485  | 0.25 | 0.699278 | 0.961 |
| LST1       | 0.25 | 0.645965 | 0.954 |
| LYRM4      | 0.25 | 0.645965 | 0.954 |
| MAGEA10    | 0.25 | 0.645965 | 0.954 |
| MCMDC2     | 0.25 | 0.645965 | 0.954 |

|           |      |          |       |
|-----------|------|----------|-------|
| MDN1      | 0.25 | 0.680101 | 0.961 |
| MEDAG     | 0.25 | 0.645965 | 0.954 |
| MOB3C     | 0.25 | 0.645965 | 0.954 |
| MRFAP1L1  | 0.25 | 0.66268  | 0.961 |
| MTPN      | 0.25 | 0.645966 | 0.954 |
| MYO5C     | 0.25 | 0.645965 | 0.954 |
| NDUFS5    | 0.25 | 0.66268  | 0.961 |
| NT5C3A    | 0.25 | 0.645965 | 0.954 |
| NUP210    | 0.25 | 0.645965 | 0.954 |
| OR1L4     | 0.25 | 0.645965 | 0.954 |
| OR4A16    | 0.25 | 0.645966 | 0.954 |
| OR5F1     | 0.25 | 0.645966 | 0.954 |
| P2RY14    | 0.25 | 0.645965 | 0.954 |
| PC        | 0.25 | 0.645965 | 0.954 |
| PGLYRP1   | 0.25 | 0.645965 | 0.954 |
| PICK1     | 0.25 | 0.645966 | 0.954 |
| PIK3CB    | 0.25 | 0.645965 | 0.954 |
| PIR       | 0.25 | 0.645965 | 0.954 |
| PPEF1     | 0.25 | 0.645965 | 0.954 |
| PPEF2     | 0.25 | 0.645965 | 0.954 |
| PRIMA1    | 0.25 | 0.645965 | 0.954 |
| PTGES3L-A | 0.25 | 0.645965 | 0.954 |
| PTPRK     | 0.25 | 0.645965 | 0.954 |
| PVRL3     | 0.25 | 0.645965 | 0.954 |
| PWP1      | 0.25 | 0.645965 | 0.954 |
| R3HDM1    | 0.25 | 0.645965 | 0.954 |
| RAMP3     | 0.25 | 0.645965 | 0.954 |
| RDX       | 0.25 | 0.645965 | 0.954 |
| RGS19     | 0.25 | 0.645965 | 0.954 |
| RHD       | 0.25 | 0.645965 | 0.954 |
| RIPPLY3   | 0.25 | 0.645965 | 0.954 |
| RNF130    | 0.25 | 0.645965 | 0.954 |
| RTP3      | 0.25 | 0.645965 | 0.954 |
| RWDD2B    | 0.25 | 0.645965 | 0.954 |
| SAP30L    | 0.25 | 0.66268  | 0.961 |
| SLC25A4   | 0.25 | 0.645965 | 0.954 |
| SOX17     | 0.25 | 0.645965 | 0.954 |
| SPATA2L   | 0.25 | 0.680101 | 0.961 |
| SYT11     | 0.25 | 0.645966 | 0.954 |
| TCTA      | 0.25 | 0.645965 | 0.954 |
| TDGF1     | 0.25 | 0.645965 | 0.954 |
| TNFRSF13C | 0.25 | 0.645965 | 0.954 |
| TOR4A     | 0.25 | 0.645965 | 0.954 |
| TRIM33    | 0.25 | 0.645965 | 0.954 |
| TRIM68    | 0.25 | 0.645965 | 0.954 |
| TSG101    | 0.25 | 0.645965 | 0.954 |
| TWIST2    | 0.25 | 0.645966 | 0.954 |

|          |      |          |       |
|----------|------|----------|-------|
| UBL5     | 0.25 | 0.719277 | 0.961 |
| UGT2B11  | 0.25 | 0.645966 | 0.954 |
| WFDC13   | 0.25 | 0.645966 | 0.954 |
| ZBTB40   | 0.25 | 0.645965 | 0.954 |
| ZNF234   | 0.25 | 0.645965 | 0.954 |
| ZNF24    | 0.25 | 0.645965 | 0.954 |
| ZNF358   | 0.25 | 0.645965 | 0.954 |
| ZNF471   | 0.25 | 0.645965 | 0.954 |
| ZNF557   | 0.25 | 0.645965 | 0.954 |
| ZNF561   | 0.25 | 0.66268  | 0.961 |
| ZNF707   | 0.25 | 0.645965 | 0.954 |
| ZNF780B  | 0.25 | 0.645965 | 0.954 |
| A3GALT2  | 0.26 | 0.633308 | 0.951 |
| ADAT3    | 0.26 | 0.633307 | 0.951 |
| AIF1     | 0.26 | 0.633307 | 0.951 |
| ALDH1L1  | 0.26 | 0.633307 | 0.951 |
| ANGPTL3  | 0.26 | 0.633307 | 0.951 |
| ANKRD12  | 0.26 | 0.633308 | 0.951 |
| ASGR1    | 0.26 | 0.633308 | 0.951 |
| C16orf89 | 0.26 | 0.633307 | 0.951 |
| C16orf96 | 0.26 | 0.633308 | 0.951 |
| C18orf32 | 0.26 | 0.732307 | 0.961 |
| C18orf65 | 0.26 | 0.650534 | 0.958 |
| C1orf127 | 0.26 | 0.633308 | 0.951 |
| C6orf229 | 0.26 | 0.633307 | 0.951 |
| CAND1    | 0.26 | 0.633308 | 0.951 |
| CARD16   | 0.26 | 0.633308 | 0.951 |
| CD81     | 0.26 | 0.633308 | 0.951 |
| CDC25C   | 0.26 | 0.633308 | 0.951 |
| CDH1     | 0.26 | 0.633308 | 0.951 |
| CLCN4    | 0.26 | 0.633308 | 0.951 |
| COA5     | 0.26 | 0.668652 | 0.961 |
| COA6     | 0.26 | 0.633307 | 0.951 |
| CRYAA    | 0.26 | 0.633307 | 0.951 |
| CSPG5    | 0.26 | 0.633308 | 0.951 |
| CTBS     | 0.26 | 0.633307 | 0.951 |
| CTSB     | 0.26 | 0.633307 | 0.951 |
| CTTN     | 0.26 | 0.650534 | 0.958 |
| CXCL11   | 0.26 | 0.650534 | 0.958 |
| DEF6     | 0.26 | 0.633308 | 0.951 |
| DEFB113  | 0.26 | 0.633308 | 0.951 |
| DHRS9    | 0.26 | 0.633307 | 0.951 |
| DKK4     | 0.26 | 0.633308 | 0.951 |
| DNAJC28  | 0.26 | 0.633307 | 0.951 |
| ESRRA    | 0.26 | 0.633308 | 0.951 |
| F7       | 0.26 | 0.633308 | 0.951 |
| FAM124A  | 0.26 | 0.633308 | 0.951 |

|           |      |          |       |
|-----------|------|----------|-------|
| FAM184B   | 0.26 | 0.633307 | 0.951 |
| FAM21C    | 0.26 | 0.633307 | 0.951 |
| FAM65A    | 0.26 | 0.633308 | 0.951 |
| FBXL18    | 0.26 | 0.633308 | 0.951 |
| FDCSP     | 0.26 | 0.650534 | 0.958 |
| FGFR1OP2  | 0.26 | 0.633308 | 0.951 |
| FOLH1     | 0.26 | 0.633308 | 0.951 |
| GABARAPL  | 0.26 | 0.633308 | 0.951 |
| GIPR      | 0.26 | 0.633308 | 0.951 |
| GLYAT     | 0.26 | 0.633308 | 0.951 |
| GPR108    | 0.26 | 0.633307 | 0.951 |
| HERPUD1   | 0.26 | 0.633308 | 0.951 |
| HOXA13    | 0.26 | 0.633308 | 0.951 |
| HOXB1     | 0.26 | 0.650534 | 0.958 |
| HSPB1     | 0.26 | 0.633308 | 0.951 |
| IGFBP5    | 0.26 | 0.633308 | 0.951 |
| IGFL3     | 0.26 | 0.633308 | 0.951 |
| KIF23     | 0.26 | 0.650534 | 0.958 |
| KIF3C     | 0.26 | 0.633307 | 0.951 |
| KISS1R    | 0.26 | 0.633307 | 0.951 |
| KLRC4     | 0.26 | 0.633308 | 0.951 |
| KRT82     | 0.26 | 0.633308 | 0.951 |
| KRTAP22-1 | 0.26 | 0.633308 | 0.951 |
| LHX6      | 0.26 | 0.633307 | 0.951 |
| LILRB3    | 0.26 | 0.633308 | 0.951 |
| LIMCH1    | 0.26 | 0.633308 | 0.951 |
| LIPI      | 0.26 | 0.633308 | 0.951 |
| LOXL4     | 0.26 | 0.650534 | 0.958 |
| MED28     | 0.26 | 0.633308 | 0.951 |
| MPDZ      | 0.26 | 0.650534 | 0.958 |
| NCKAP1L   | 0.26 | 0.633307 | 0.951 |
| NUDT22    | 0.26 | 0.668652 | 0.961 |
| OR8J3     | 0.26 | 0.650534 | 0.958 |
| PCNT      | 0.26 | 0.633307 | 0.951 |
| PCSK1     | 0.26 | 0.633308 | 0.951 |
| PNN       | 0.26 | 0.650534 | 0.958 |
| POMK      | 0.26 | 0.633308 | 0.951 |
| PPP3R2    | 0.26 | 0.633308 | 0.951 |
| PRR7      | 0.26 | 0.633308 | 0.951 |
| PTH1R     | 0.26 | 0.633307 | 0.951 |
| RCSD1     | 0.26 | 0.633308 | 0.951 |
| RDH14     | 0.26 | 0.633307 | 0.951 |
| RHOBTB2   | 0.26 | 0.633308 | 0.951 |
| RNASEK    | 0.26 | 0.650534 | 0.958 |
| RTN4IP1   | 0.26 | 0.633308 | 0.951 |
| S100A16   | 0.26 | 0.633307 | 0.951 |
| SAP30     | 0.26 | 0.633308 | 0.951 |

|          |      |          |       |
|----------|------|----------|-------|
| SCGB2A2  | 0.26 | 0.633308 | 0.951 |
| SEC14L4  | 0.26 | 0.633308 | 0.951 |
| SIX1     | 0.26 | 0.650534 | 0.958 |
| SLC10A5  | 0.26 | 0.633307 | 0.951 |
| SLC36A2  | 0.26 | 0.633308 | 0.951 |
| SLC9A6   | 0.26 | 0.633308 | 0.951 |
| SNCAIP   | 0.26 | 0.633308 | 0.951 |
| SPTBN5   | 0.26 | 0.633308 | 0.951 |
| SRGN     | 0.26 | 0.633308 | 0.951 |
| SSTR1    | 0.26 | 0.633307 | 0.951 |
| STXBP3   | 0.26 | 0.633307 | 0.951 |
| SURF6    | 0.26 | 0.668652 | 0.961 |
| TMEM154  | 0.26 | 0.650534 | 0.958 |
| TMEM82   | 0.26 | 0.650534 | 0.958 |
| TMEM91   | 0.26 | 0.633308 | 0.951 |
| TPRKB    | 0.26 | 0.650534 | 0.958 |
| TRAF4    | 0.26 | 0.633308 | 0.951 |
| TRIML1   | 0.26 | 0.633307 | 0.951 |
| TTC39A   | 0.26 | 0.650534 | 0.958 |
| TUBA3C   | 0.26 | 0.633308 | 0.951 |
| URGCP    | 0.26 | 0.633307 | 0.951 |
| USP17L19 | 0.26 | 0.688333 | 0.961 |
| VAV2     | 0.26 | 0.633307 | 0.951 |
| WDFY4    | 0.26 | 0.633308 | 0.951 |
| WDR65    | 0.26 | 0.633308 | 0.951 |
| ZBED6    | 0.26 | 0.633308 | 0.951 |
| ZNF227   | 0.26 | 0.633307 | 0.951 |
| ZNF674   | 0.26 | 0.633308 | 0.951 |
| AADACL4  | 0.27 | 0.620808 | 0.948 |
| ADD3     | 0.27 | 0.620808 | 0.948 |
| ANKRD28  | 0.27 | 0.620808 | 0.948 |
| ARSA     | 0.27 | 0.620808 | 0.948 |
| ATXN7    | 0.27 | 0.620808 | 0.948 |
| BCAS4    | 0.27 | 0.620808 | 0.948 |
| C15orf39 | 0.27 | 0.638508 | 0.954 |
| C15orf62 | 0.27 | 0.620808 | 0.948 |
| C2orf16  | 0.27 | 0.620808 | 0.948 |
| CACNA1H  | 0.27 | 0.620808 | 0.948 |
| CADM4    | 0.27 | 0.620808 | 0.948 |
| CAMKMT   | 0.27 | 0.620808 | 0.948 |
| CASK     | 0.27 | 0.620808 | 0.948 |
| CBR4     | 0.27 | 0.620808 | 0.948 |
| CBWD3    | 0.27 | 0.620808 | 0.948 |
| CDC42EP5 | 0.27 | 0.620808 | 0.948 |
| CDT1     | 0.27 | 0.677367 | 0.961 |
| DAPK1    | 0.27 | 0.620808 | 0.948 |
| DCBLD2   | 0.27 | 0.657214 | 0.958 |

|          |      |          |       |
|----------|------|----------|-------|
| DIABLO   | 0.27 | 0.620808 | 0.948 |
| DNASE1   | 0.27 | 0.620808 | 0.948 |
| DRAM2    | 0.27 | 0.620808 | 0.948 |
| DXO      | 0.27 | 0.638509 | 0.954 |
| EDEM3    | 0.27 | 0.620808 | 0.948 |
| EEF1A1   | 0.27 | 0.620808 | 0.948 |
| EIF3CL   | 0.27 | 0.620808 | 0.948 |
| EMP3     | 0.27 | 0.620808 | 0.948 |
| FAM47B   | 0.27 | 0.620808 | 0.948 |
| FAM86A   | 0.27 | 0.620808 | 0.948 |
| FBLN2    | 0.27 | 0.620808 | 0.948 |
| FRG2     | 0.27 | 0.638508 | 0.954 |
| FZD6     | 0.27 | 0.620808 | 0.948 |
| G6PC3    | 0.27 | 0.620808 | 0.948 |
| GABRR2   | 0.27 | 0.620808 | 0.948 |
| GGCT     | 0.27 | 0.620808 | 0.948 |
| GJC2     | 0.27 | 0.620808 | 0.948 |
| GNA12    | 0.27 | 0.620808 | 0.948 |
| GNL2     | 0.27 | 0.620808 | 0.948 |
| GPR31    | 0.27 | 0.620808 | 0.948 |
| GPR68    | 0.27 | 0.620808 | 0.948 |
| GRID1    | 0.27 | 0.620808 | 0.948 |
| HCN4     | 0.27 | 0.620808 | 0.948 |
| HDAC6    | 0.27 | 0.620808 | 0.948 |
| HMG20B   | 0.27 | 0.620808 | 0.948 |
| HS1BP3   | 0.27 | 0.638509 | 0.954 |
| IL31     | 0.27 | 0.620808 | 0.948 |
| ITM2A    | 0.27 | 0.620808 | 0.948 |
| KAAG1    | 0.27 | 0.638508 | 0.954 |
| KIAA0020 | 0.27 | 0.657213 | 0.958 |
| KIAA0141 | 0.27 | 0.620808 | 0.948 |
| KLHDC3   | 0.27 | 0.620808 | 0.948 |
| LAMTOR2  | 0.27 | 0.620808 | 0.948 |
| LDLRAD4  | 0.27 | 0.638509 | 0.954 |
| LINGO2   | 0.27 | 0.620808 | 0.948 |
| LITAF    | 0.27 | 0.620808 | 0.948 |
| LRFN1    | 0.27 | 0.638508 | 0.954 |
| LRRIQ4   | 0.27 | 0.638509 | 0.954 |
| LRRTM1   | 0.27 | 0.620808 | 0.948 |
| MBL2     | 0.27 | 0.620808 | 0.948 |
| ME2      | 0.27 | 0.620808 | 0.948 |
| MFAP5    | 0.27 | 0.620808 | 0.948 |
| MOSPD3   | 0.27 | 0.638509 | 0.954 |
| MRPL14   | 0.27 | 0.620808 | 0.948 |
| MSANTD1  | 0.27 | 0.620808 | 0.948 |
| MTL5     | 0.27 | 0.620808 | 0.948 |
| NAALAD2  | 0.27 | 0.620808 | 0.948 |

|          |      |          |       |
|----------|------|----------|-------|
| NAP1L1   | 0.27 | 0.638509 | 0.954 |
| NDST1    | 0.27 | 0.620808 | 0.948 |
| NUDT5    | 0.27 | 0.638509 | 0.954 |
| OR10AD1  | 0.27 | 0.620808 | 0.948 |
| OR10X1   | 0.27 | 0.638508 | 0.954 |
| PFDN5    | 0.27 | 0.620808 | 0.948 |
| PFN4     | 0.27 | 0.620808 | 0.948 |
| PLEKHO1  | 0.27 | 0.620808 | 0.948 |
| POU6F2   | 0.27 | 0.620808 | 0.948 |
| PSMD9    | 0.27 | 0.620808 | 0.948 |
| PXT1     | 0.27 | 0.620808 | 0.948 |
| RBM8A    | 0.27 | 0.638508 | 0.954 |
| REG3G    | 0.27 | 0.620808 | 0.948 |
| RELT     | 0.27 | 0.620808 | 0.948 |
| REM2     | 0.27 | 0.620808 | 0.948 |
| RLN1     | 0.27 | 0.620808 | 0.948 |
| RPS2     | 0.27 | 0.620808 | 0.948 |
| SCARA5   | 0.27 | 0.620808 | 0.948 |
| SERPINB4 | 0.27 | 0.620808 | 0.948 |
| SHPRH    | 0.27 | 0.620808 | 0.948 |
| SIGLEC12 | 0.27 | 0.620808 | 0.948 |
| SIT1     | 0.27 | 0.620808 | 0.948 |
| SLC10A3  | 0.27 | 0.620808 | 0.948 |
| SLC9A8   | 0.27 | 0.620808 | 0.948 |
| SNX21    | 0.27 | 0.620808 | 0.948 |
| SPINK4   | 0.27 | 0.620808 | 0.948 |
| STAP1    | 0.27 | 0.620808 | 0.948 |
| STC2     | 0.27 | 0.620808 | 0.948 |
| TAF7L    | 0.27 | 0.620808 | 0.948 |
| TBC1D26  | 0.27 | 0.638509 | 0.954 |
| TINAGL1  | 0.27 | 0.620808 | 0.948 |
| TLL1     | 0.27 | 0.620808 | 0.948 |
| TMEM135  | 0.27 | 0.620808 | 0.948 |
| TNFRSF14 | 0.27 | 0.620808 | 0.948 |
| TRPM1    | 0.27 | 0.620808 | 0.948 |
| UBC      | 0.27 | 0.620808 | 0.948 |
| UBE2NL   | 0.27 | 0.620808 | 0.948 |
| UGT2B10  | 0.27 | 0.620808 | 0.948 |
| UNC119   | 0.27 | 0.620808 | 0.948 |
| UQCR10   | 0.27 | 0.620808 | 0.948 |
| VPS39    | 0.27 | 0.620808 | 0.948 |
| VRK2     | 0.27 | 0.620808 | 0.948 |
| WDYHV1   | 0.27 | 0.620808 | 0.948 |
| XPO4     | 0.27 | 0.620808 | 0.948 |
| ZFR2     | 0.27 | 0.638509 | 0.954 |
| ZNF174   | 0.27 | 0.620808 | 0.948 |
| ZNF442   | 0.27 | 0.620808 | 0.948 |

|          |      |          |       |
|----------|------|----------|-------|
| ZNF483   | 0.27 | 0.620808 | 0.948 |
| ZNF541   | 0.27 | 0.638508 | 0.954 |
| ZNF844   | 0.27 | 0.620808 | 0.948 |
| ACSM2A   | 0.28 | 0.608465 | 0.947 |
| ACSM2B   | 0.28 | 0.608465 | 0.947 |
| ADPRH    | 0.28 | 0.608464 | 0.947 |
| AGAP5    | 0.28 | 0.608465 | 0.947 |
| ARHGEF40 | 0.28 | 0.608465 | 0.947 |
| ASGR2    | 0.28 | 0.608465 | 0.947 |
| ATP5H    | 0.28 | 0.608465 | 0.947 |
| BAGE     | 0.28 | 0.740467 | 0.961 |
| BAGE2    | 0.28 | 0.740467 | 0.961 |
| BAGE3    | 0.28 | 0.740467 | 0.961 |
| BAGE4    | 0.28 | 0.740467 | 0.961 |
| BAGE5    | 0.28 | 0.740467 | 0.961 |
| BMP1     | 0.28 | 0.6266   | 0.951 |
| BTNL3    | 0.28 | 0.608465 | 0.947 |
| C12orf10 | 0.28 | 0.608465 | 0.947 |
| C3orf18  | 0.28 | 0.608464 | 0.947 |
| C5AR1    | 0.28 | 0.6266   | 0.951 |
| CABP5    | 0.28 | 0.608464 | 0.947 |
| CAPS2    | 0.28 | 0.608465 | 0.947 |
| CCDC148  | 0.28 | 0.608464 | 0.947 |
| CCDC88C  | 0.28 | 0.608465 | 0.947 |
| CDH9     | 0.28 | 0.608465 | 0.947 |
| CDSN     | 0.28 | 0.6266   | 0.951 |
| CECR2    | 0.28 | 0.608465 | 0.947 |
| CENPP    | 0.28 | 0.626599 | 0.951 |
| CHAMP1   | 0.28 | 0.608465 | 0.947 |
| COQ4     | 0.28 | 0.608465 | 0.947 |
| CPED1    | 0.28 | 0.608464 | 0.947 |
| CTDSPL   | 0.28 | 0.608465 | 0.947 |
| CXorf65  | 0.28 | 0.608465 | 0.947 |
| CYP2F1   | 0.28 | 0.608464 | 0.947 |
| DAO      | 0.28 | 0.6266   | 0.951 |
| DCUN1D3  | 0.28 | 0.608465 | 0.947 |
| DMBX1    | 0.28 | 0.608465 | 0.947 |
| DOCK5    | 0.28 | 0.608465 | 0.947 |
| DSCAML1  | 0.28 | 0.608465 | 0.947 |
| DSN1     | 0.28 | 0.6266   | 0.951 |
| DUSP8    | 0.28 | 0.608465 | 0.947 |
| DUXA     | 0.28 | 0.6266   | 0.951 |
| EPHA3    | 0.28 | 0.608465 | 0.947 |
| F10      | 0.28 | 0.608465 | 0.947 |
| FAH      | 0.28 | 0.608465 | 0.947 |
| FAM166A  | 0.28 | 0.608465 | 0.947 |
| FBLN7    | 0.28 | 0.608464 | 0.947 |

|          |      |          |       |
|----------|------|----------|-------|
| FGF20    | 0.28 | 0.608465 | 0.947 |
| FGFR4    | 0.28 | 0.608465 | 0.947 |
| FOXA1    | 0.28 | 0.608465 | 0.947 |
| FSIP2    | 0.28 | 0.608465 | 0.947 |
| GABRA1   | 0.28 | 0.608465 | 0.947 |
| GABRA5   | 0.28 | 0.608464 | 0.947 |
| GAPVD1   | 0.28 | 0.608464 | 0.947 |
| GATAD1   | 0.28 | 0.608465 | 0.947 |
| GHDC     | 0.28 | 0.608465 | 0.947 |
| GPM6A    | 0.28 | 0.608465 | 0.947 |
| GTF2H3   | 0.28 | 0.626599 | 0.951 |
| HBG2     | 0.28 | 0.608465 | 0.947 |
| HNRNPF   | 0.28 | 0.608465 | 0.947 |
| ICA1L    | 0.28 | 0.608464 | 0.947 |
| IL17RC   | 0.28 | 0.608465 | 0.947 |
| IL1R1    | 0.28 | 0.608465 | 0.947 |
| ITGB2    | 0.28 | 0.608465 | 0.947 |
| KCNJ4    | 0.28 | 0.6266   | 0.951 |
| KCTD5    | 0.28 | 0.608464 | 0.947 |
| KIAA0232 | 0.28 | 0.608464 | 0.947 |
| KIAA0368 | 0.28 | 0.608465 | 0.947 |
| LCN10    | 0.28 | 0.64578  | 0.954 |
| LIPJ     | 0.28 | 0.608464 | 0.947 |
| LRP2     | 0.28 | 0.608465 | 0.947 |
| MAATS1   | 0.28 | 0.608465 | 0.947 |
| MPP5     | 0.28 | 0.608464 | 0.947 |
| MROH5    | 0.28 | 0.608465 | 0.947 |
| MRPS21   | 0.28 | 0.645781 | 0.954 |
| MST4     | 0.28 | 0.608464 | 0.947 |
| MSX1     | 0.28 | 0.608465 | 0.947 |
| NAIP     | 0.28 | 0.608464 | 0.947 |
| NBPF24   | 0.28 | 0.626599 | 0.951 |
| NKX2-4   | 0.28 | 0.608465 | 0.947 |
| NOS2     | 0.28 | 0.608465 | 0.947 |
| OR2AG1   | 0.28 | 0.608465 | 0.947 |
| OR2C3    | 0.28 | 0.608464 | 0.947 |
| OR5B2    | 0.28 | 0.608465 | 0.947 |
| OR8D4    | 0.28 | 0.608465 | 0.947 |
| PAK7     | 0.28 | 0.608464 | 0.947 |
| PATE1    | 0.28 | 0.608464 | 0.947 |
| PCP4L1   | 0.28 | 0.6266   | 0.951 |
| PDE4C    | 0.28 | 0.608465 | 0.947 |
| PGAM1    | 0.28 | 0.608465 | 0.947 |
| PLK2     | 0.28 | 0.608464 | 0.947 |
| PNPLA8   | 0.28 | 0.6266   | 0.951 |
| POLA2    | 0.28 | 0.64578  | 0.954 |
| PON1     | 0.28 | 0.608465 | 0.947 |

|          |      |          |       |
|----------|------|----------|-------|
| POU3F3   | 0.28 | 0.608465 | 0.947 |
| PPP1CC   | 0.28 | 0.608465 | 0.947 |
| PRB2     | 0.28 | 0.608465 | 0.947 |
| PRR9     | 0.28 | 0.608465 | 0.947 |
| QDPR     | 0.28 | 0.608465 | 0.947 |
| RAB22A   | 0.28 | 0.608465 | 0.947 |
| RAP2A    | 0.28 | 0.608465 | 0.947 |
| ROR1     | 0.28 | 0.608465 | 0.947 |
| RPAIN    | 0.28 | 0.608465 | 0.947 |
| SDC4     | 0.28 | 0.608465 | 0.947 |
| SERPINA7 | 0.28 | 0.608465 | 0.947 |
| SF3B5    | 0.28 | 0.645781 | 0.954 |
| SFTPA1   | 0.28 | 0.608465 | 0.947 |
| SH2D1B   | 0.28 | 0.608465 | 0.947 |
| SHKBP1   | 0.28 | 0.608465 | 0.947 |
| SLC45A1  | 0.28 | 0.608465 | 0.947 |
| SMAD6    | 0.28 | 0.608465 | 0.947 |
| SNX6     | 0.28 | 0.608465 | 0.947 |
| SPG21    | 0.28 | 0.608465 | 0.947 |
| STS      | 0.28 | 0.608465 | 0.947 |
| SYNPR    | 0.28 | 0.608465 | 0.947 |
| TAS2R31  | 0.28 | 0.608465 | 0.947 |
| TDRD9    | 0.28 | 0.608465 | 0.947 |
| TGFBI    | 0.28 | 0.608465 | 0.947 |
| TICAM1   | 0.28 | 0.6266   | 0.951 |
| TMEM241  | 0.28 | 0.608465 | 0.947 |
| UPK3BL   | 0.28 | 0.608465 | 0.947 |
| ZAR1     | 0.28 | 0.608465 | 0.947 |
| ZBTB46   | 0.28 | 0.608465 | 0.947 |
| ZNF528   | 0.28 | 0.608465 | 0.947 |
| ZNF74    | 0.28 | 0.608465 | 0.947 |
| ZNF812   | 0.28 | 0.608465 | 0.947 |
| ADTRP    | 0.29 | 0.596205 | 0.946 |
| AGAP7    | 0.29 | 0.614757 | 0.948 |
| AKAP17A  | 0.29 | 0.596204 | 0.946 |
| ANXA4    | 0.29 | 0.596205 | 0.946 |
| APP      | 0.29 | 0.596205 | 0.946 |
| ARHGAP33 | 0.29 | 0.614758 | 0.948 |
| ARRB2    | 0.29 | 0.596204 | 0.946 |
| ARTN     | 0.29 | 0.596204 | 0.946 |
| ATCAY    | 0.29 | 0.596204 | 0.946 |
| ATL1     | 0.29 | 0.614758 | 0.948 |
| ATP1B2   | 0.29 | 0.596205 | 0.946 |
| ATP2C1   | 0.29 | 0.596204 | 0.946 |
| ATXN7L2  | 0.29 | 0.596204 | 0.946 |
| BICC1    | 0.29 | 0.596205 | 0.946 |
| BTLA     | 0.29 | 0.596204 | 0.946 |

|           |      |          |       |
|-----------|------|----------|-------|
| C19orf18  | 0.29 | 0.596204 | 0.946 |
| C4orf45   | 0.29 | 0.596204 | 0.946 |
| CACNG6    | 0.29 | 0.596204 | 0.946 |
| CBR1      | 0.29 | 0.614757 | 0.948 |
| CCDC146   | 0.29 | 0.596204 | 0.946 |
| CCDC74A   | 0.29 | 0.596205 | 0.946 |
| CDK14     | 0.29 | 0.596204 | 0.946 |
| CDK5RAP1  | 0.29 | 0.596204 | 0.946 |
| CKAP4     | 0.29 | 0.596205 | 0.946 |
| CLCN5     | 0.29 | 0.596204 | 0.946 |
| CRNN      | 0.29 | 0.596204 | 0.946 |
| CSDC2     | 0.29 | 0.614757 | 0.948 |
| CTAGE9    | 0.29 | 0.614758 | 0.948 |
| DHX36     | 0.29 | 0.614757 | 0.948 |
| DNAJC7    | 0.29 | 0.596205 | 0.946 |
| DPP9      | 0.29 | 0.596205 | 0.946 |
| EGFLAM    | 0.29 | 0.596205 | 0.946 |
| FARSB     | 0.29 | 0.614758 | 0.948 |
| GCAT      | 0.29 | 0.596204 | 0.946 |
| GCNT2     | 0.29 | 0.596205 | 0.946 |
| GMFB      | 0.29 | 0.614758 | 0.948 |
| HIST1H2BD | 0.29 | 0.614757 | 0.948 |
| HIST1H2BF | 0.29 | 0.634525 | 0.953 |
| HOXD8     | 0.29 | 0.596204 | 0.946 |
| HTR1B     | 0.29 | 0.614758 | 0.948 |
| ID2       | 0.29 | 0.596204 | 0.946 |
| KCNK13    | 0.29 | 0.596205 | 0.946 |
| KLF2      | 0.29 | 0.596204 | 0.946 |
| KRT34     | 0.29 | 0.596204 | 0.946 |
| KRTAP2-1  | 0.29 | 0.596205 | 0.946 |
| KRTAP2-2  | 0.29 | 0.596205 | 0.946 |
| KRTAP5-7  | 0.29 | 0.596205 | 0.946 |
| LGALS7B   | 0.29 | 0.596205 | 0.946 |
| LHCGR     | 0.29 | 0.596205 | 0.946 |
| LRRC4C    | 0.29 | 0.596204 | 0.946 |
| LRRC8C    | 0.29 | 0.596205 | 0.946 |
| LYZ       | 0.29 | 0.596205 | 0.946 |
| MARCH9    | 0.29 | 0.596205 | 0.946 |
| MIXL1     | 0.29 | 0.596204 | 0.946 |
| MT1E      | 0.29 | 0.65563  | 0.958 |
| NUCB1     | 0.29 | 0.596204 | 0.946 |
| NUMBL     | 0.29 | 0.614758 | 0.948 |
| OASL      | 0.29 | 0.596205 | 0.946 |
| OR14A16   | 0.29 | 0.596205 | 0.946 |
| OR52L1    | 0.29 | 0.596204 | 0.946 |
| PAPD4     | 0.29 | 0.596204 | 0.946 |
| PHLDA3    | 0.29 | 0.596204 | 0.946 |

|         |      |          |       |
|---------|------|----------|-------|
| POLB    | 0.29 | 0.596204 | 0.946 |
| PPIL2   | 0.29 | 0.596204 | 0.946 |
| PRPF38B | 0.29 | 0.655631 | 0.958 |
| PRRT4   | 0.29 | 0.614758 | 0.948 |
| PRTFDC1 | 0.29 | 0.596205 | 0.946 |
| PTPN12  | 0.29 | 0.596204 | 0.946 |
| RHO     | 0.29 | 0.596204 | 0.946 |
| RNF113A | 0.29 | 0.614757 | 0.948 |
| RNF19A  | 0.29 | 0.596205 | 0.946 |
| S100A13 | 0.29 | 0.596204 | 0.946 |
| SAMD10  | 0.29 | 0.596204 | 0.946 |
| SLC16A3 | 0.29 | 0.596204 | 0.946 |
| SLC19A2 | 0.29 | 0.596205 | 0.946 |
| SMPX    | 0.29 | 0.596204 | 0.946 |
| SOBP    | 0.29 | 0.596204 | 0.946 |
| SPDYE1  | 0.29 | 0.596204 | 0.946 |
| SPDYE6  | 0.29 | 0.596204 | 0.946 |
| SSX7    | 0.29 | 0.596205 | 0.946 |
| STK32C  | 0.29 | 0.596204 | 0.946 |
| SYT1    | 0.29 | 0.596204 | 0.946 |
| TAS2R14 | 0.29 | 0.596204 | 0.946 |
| TBATA   | 0.29 | 0.596204 | 0.946 |
| TBL3    | 0.29 | 0.614758 | 0.948 |
| TDP2    | 0.29 | 0.596204 | 0.946 |
| TMEM33  | 0.29 | 0.596205 | 0.946 |
| TNRC18  | 0.29 | 0.596204 | 0.946 |
| TRIM49C | 0.29 | 0.596205 | 0.946 |
| TSHR    | 0.29 | 0.596204 | 0.946 |
| TTLL9   | 0.29 | 0.596204 | 0.946 |
| TTPAL   | 0.29 | 0.596204 | 0.946 |
| TUSC3   | 0.29 | 0.596204 | 0.946 |
| TXK     | 0.29 | 0.596204 | 0.946 |
| TXNRD2  | 0.29 | 0.614757 | 0.948 |
| UBAP2L  | 0.29 | 0.596205 | 0.946 |
| UGT3A2  | 0.29 | 0.596204 | 0.946 |
| WHAMM   | 0.29 | 0.596204 | 0.946 |
| YAF2    | 0.29 | 0.596205 | 0.946 |
| ZNF207  | 0.29 | 0.596204 | 0.946 |
| ZNF655  | 0.29 | 0.596205 | 0.946 |
| ZNRF4   | 0.29 | 0.596204 | 0.946 |
| ACAA2   | 0.3  | 0.584027 | 0.943 |
| ADAM17  | 0.3  | 0.584027 | 0.943 |
| AMBP    | 0.3  | 0.584026 | 0.943 |
| AMHR2   | 0.3  | 0.603062 | 0.947 |
| ANKRD60 | 0.3  | 0.584026 | 0.943 |
| ASPA    | 0.3  | 0.584027 | 0.943 |
| ATP4B   | 0.3  | 0.603061 | 0.947 |

|            |     |          |       |
|------------|-----|----------|-------|
| AVPR2      | 0.3 | 0.584027 | 0.943 |
| BMP4       | 0.3 | 0.584026 | 0.943 |
| BTBD11     | 0.3 | 0.584027 | 0.943 |
| C11orf65   | 0.3 | 0.584027 | 0.943 |
| C15orf48   | 0.3 | 0.584027 | 0.943 |
| C6orf15    | 0.3 | 0.603061 | 0.947 |
| C7orf77    | 0.3 | 0.584027 | 0.943 |
| CACNG8     | 0.3 | 0.584027 | 0.943 |
| CAMKK1     | 0.3 | 0.584026 | 0.943 |
| CCDC179    | 0.3 | 0.584026 | 0.943 |
| CCDC25     | 0.3 | 0.584027 | 0.943 |
| CCDC92     | 0.3 | 0.584027 | 0.943 |
| CCT2       | 0.3 | 0.644989 | 0.954 |
| CENPE      | 0.3 | 0.584027 | 0.943 |
| CHST9      | 0.3 | 0.584027 | 0.943 |
| CLEC10A    | 0.3 | 0.584027 | 0.943 |
| COL14A1    | 0.3 | 0.584027 | 0.943 |
| CPNE4      | 0.3 | 0.603061 | 0.947 |
| CRY1       | 0.3 | 0.584027 | 0.943 |
| CSRNP3     | 0.3 | 0.584027 | 0.943 |
| CTXN3      | 0.3 | 0.584026 | 0.943 |
| CYSLTR1    | 0.3 | 0.584027 | 0.943 |
| CYTL1      | 0.3 | 0.584027 | 0.943 |
| DCHS2      | 0.3 | 0.584027 | 0.943 |
| DLST       | 0.3 | 0.623277 | 0.951 |
| DNAH12     | 0.3 | 0.584026 | 0.943 |
| DNAJB13    | 0.3 | 0.584027 | 0.943 |
| DNAJC4     | 0.3 | 0.584027 | 0.943 |
| DNAJC5B    | 0.3 | 0.584027 | 0.943 |
| DSEL       | 0.3 | 0.584027 | 0.943 |
| DSTYK      | 0.3 | 0.584026 | 0.943 |
| ENO4       | 0.3 | 0.603062 | 0.947 |
| EXO1       | 0.3 | 0.584026 | 0.943 |
| FAM122B    | 0.3 | 0.584027 | 0.943 |
| FARP1      | 0.3 | 0.584026 | 0.943 |
| FEZ1       | 0.3 | 0.584026 | 0.943 |
| FFAR3      | 0.3 | 0.584027 | 0.943 |
| FPGT-TNNI3 | 0.3 | 0.584027 | 0.943 |
| GAS8       | 0.3 | 0.584027 | 0.943 |
| GEM        | 0.3 | 0.584027 | 0.943 |
| GNGT1      | 0.3 | 0.603061 | 0.947 |
| GPI        | 0.3 | 0.623278 | 0.951 |
| GRK6       | 0.3 | 0.584027 | 0.943 |
| GUCA1C     | 0.3 | 0.584027 | 0.943 |
| HECA       | 0.3 | 0.584027 | 0.943 |
| IFNA1      | 0.3 | 0.584026 | 0.943 |
| IFNA6      | 0.3 | 0.584027 | 0.943 |

|           |     |          |       |
|-----------|-----|----------|-------|
| IKZF5     | 0.3 | 0.584027 | 0.943 |
| IL1RAP    | 0.3 | 0.584027 | 0.943 |
| IL7R      | 0.3 | 0.584026 | 0.943 |
| ITIH3     | 0.3 | 0.584027 | 0.943 |
| JKAMP     | 0.3 | 0.584027 | 0.943 |
| JPH4      | 0.3 | 0.584027 | 0.943 |
| KCNE1     | 0.3 | 0.584026 | 0.943 |
| KCNG3     | 0.3 | 0.584027 | 0.943 |
| KCTD18    | 0.3 | 0.584027 | 0.943 |
| KCTD4     | 0.3 | 0.584027 | 0.943 |
| LAMB1     | 0.3 | 0.584027 | 0.943 |
| LSMEM1    | 0.3 | 0.584026 | 0.943 |
| MCTP2     | 0.3 | 0.584027 | 0.943 |
| MEP1A     | 0.3 | 0.584026 | 0.943 |
| MICALCL   | 0.3 | 0.603062 | 0.947 |
| NAT6      | 0.3 | 0.584027 | 0.943 |
| NDUFA3    | 0.3 | 0.584027 | 0.943 |
| NGDN      | 0.3 | 0.623278 | 0.951 |
| OMP       | 0.3 | 0.603062 | 0.947 |
| OR4D6     | 0.3 | 0.584027 | 0.943 |
| OR52A1    | 0.3 | 0.584026 | 0.943 |
| OR5A2     | 0.3 | 0.584027 | 0.943 |
| PM20D1    | 0.3 | 0.584027 | 0.943 |
| PNPLA7    | 0.3 | 0.603061 | 0.947 |
| POMZP3    | 0.3 | 0.584027 | 0.943 |
| POU3F1    | 0.3 | 0.584026 | 0.943 |
| PPM1L     | 0.3 | 0.584027 | 0.943 |
| PRICKLE4  | 0.3 | 0.584026 | 0.943 |
| PRY       | 0.3 | 0.584027 | 0.943 |
| PRY2      | 0.3 | 0.584027 | 0.943 |
| RAB3GAP1  | 0.3 | 0.584027 | 0.943 |
| RARRES2   | 0.3 | 0.584027 | 0.943 |
| RARRES3   | 0.3 | 0.584027 | 0.943 |
| RBAK      | 0.3 | 0.584027 | 0.943 |
| RBP1      | 0.3 | 0.584027 | 0.943 |
| RHEB      | 0.3 | 0.584027 | 0.943 |
| RIN2      | 0.3 | 0.584027 | 0.943 |
| RPL7L1    | 0.3 | 0.584026 | 0.943 |
| SCGN      | 0.3 | 0.584027 | 0.943 |
| SLC17A9   | 0.3 | 0.584027 | 0.943 |
| SLC25A21  | 0.3 | 0.584027 | 0.943 |
| SLC52A1   | 0.3 | 0.584027 | 0.943 |
| SLC6A13   | 0.3 | 0.584027 | 0.943 |
| SOWAHB    | 0.3 | 0.584027 | 0.943 |
| SPATA31E1 | 0.3 | 0.584027 | 0.943 |
| SRPX      | 0.3 | 0.584027 | 0.943 |
| TBC1D32   | 0.3 | 0.584027 | 0.943 |

|           |      |          |       |
|-----------|------|----------|-------|
| TBC1D3C   | 0.3  | 0.584027 | 0.943 |
| TBX5      | 0.3  | 0.603061 | 0.947 |
| TCP1      | 0.3  | 0.584027 | 0.943 |
| TLR7      | 0.3  | 0.584027 | 0.943 |
| TMED8     | 0.3  | 0.603062 | 0.947 |
| TMEM120B  | 0.3  | 0.603061 | 0.947 |
| TNFRSF10C | 0.3  | 0.584027 | 0.943 |
| TOB1      | 0.3  | 0.584027 | 0.943 |
| TPM3      | 0.3  | 0.584027 | 0.943 |
| TPPP      | 0.3  | 0.584027 | 0.943 |
| TSACC     | 0.3  | 0.584027 | 0.943 |
| UBTD1     | 0.3  | 0.584027 | 0.943 |
| WDR86     | 0.3  | 0.584026 | 0.943 |
| XDH       | 0.3  | 0.603061 | 0.947 |
| ZFP82     | 0.3  | 0.584027 | 0.943 |
| ZNF552    | 0.3  | 0.584027 | 0.943 |
| ZSWIM4    | 0.3  | 0.584027 | 0.943 |
| AARSD1    | 0.31 | 0.572016 | 0.943 |
| ACAD8     | 0.31 | 0.591468 | 0.946 |
| ACAP2     | 0.31 | 0.572016 | 0.943 |
| ADK       | 0.31 | 0.572015 | 0.943 |
| AFF3      | 0.31 | 0.572016 | 0.943 |
| AGBL1     | 0.31 | 0.612099 | 0.948 |
| ALG13     | 0.31 | 0.572016 | 0.943 |
| AMELY     | 0.31 | 0.591468 | 0.946 |
| AMOT      | 0.31 | 0.572016 | 0.943 |
| ANKRD44   | 0.31 | 0.572016 | 0.943 |
| ANXA7     | 0.31 | 0.591467 | 0.946 |
| ATG12     | 0.31 | 0.572016 | 0.943 |
| ATP5J     | 0.31 | 0.572016 | 0.943 |
| ATP7A     | 0.31 | 0.572016 | 0.943 |
| BCL2L12   | 0.31 | 0.572016 | 0.943 |
| C15orf43  | 0.31 | 0.572016 | 0.943 |
| C19orf12  | 0.31 | 0.591467 | 0.946 |
| C1orf229  | 0.31 | 0.572016 | 0.943 |
| C5orf20   | 0.31 | 0.572016 | 0.943 |
| C9orf116  | 0.31 | 0.591467 | 0.946 |
| CALY      | 0.31 | 0.572016 | 0.943 |
| CAND2     | 0.31 | 0.572015 | 0.943 |
| CEBPD     | 0.31 | 0.572016 | 0.943 |
| CELSR2    | 0.31 | 0.591468 | 0.946 |
| CHD3      | 0.31 | 0.591467 | 0.946 |
| CHORDC1   | 0.31 | 0.572016 | 0.943 |
| COLEC12   | 0.31 | 0.591468 | 0.946 |
| CPA5      | 0.31 | 0.572015 | 0.943 |
| CRBN      | 0.31 | 0.572016 | 0.943 |
| CTIF      | 0.31 | 0.572015 | 0.943 |

|          |      |          |       |
|----------|------|----------|-------|
| CTNNAL1  | 0.31 | 0.572016 | 0.943 |
| CTSC     | 0.31 | 0.572016 | 0.943 |
| CYP2A7   | 0.31 | 0.572015 | 0.943 |
| DDX4     | 0.31 | 0.572016 | 0.943 |
| DENND1A  | 0.31 | 0.572015 | 0.943 |
| EIF3H    | 0.31 | 0.591467 | 0.946 |
| EIF4EBP2 | 0.31 | 0.572016 | 0.943 |
| ELL      | 0.31 | 0.572016 | 0.943 |
| ERI1     | 0.31 | 0.572015 | 0.943 |
| FAM214A  | 0.31 | 0.572016 | 0.943 |
| FAM83C   | 0.31 | 0.572016 | 0.943 |
| FN3KRP   | 0.31 | 0.572016 | 0.943 |
| FREM2    | 0.31 | 0.591468 | 0.946 |
| GLIS3    | 0.31 | 0.591468 | 0.946 |
| GNA11    | 0.31 | 0.572015 | 0.943 |
| IGSF11   | 0.31 | 0.572016 | 0.943 |
| IL31RA   | 0.31 | 0.572015 | 0.943 |
| ITGA5    | 0.31 | 0.572016 | 0.943 |
| IZUMO2   | 0.31 | 0.572016 | 0.943 |
| LARP1    | 0.31 | 0.591468 | 0.946 |
| LAT2     | 0.31 | 0.572016 | 0.943 |
| LHFPL3   | 0.31 | 0.572016 | 0.943 |
| LRAT     | 0.31 | 0.572016 | 0.943 |
| LYG2     | 0.31 | 0.572016 | 0.943 |
| LYRM9    | 0.31 | 0.591468 | 0.946 |
| MAGEA3   | 0.31 | 0.572016 | 0.943 |
| MAP4K1   | 0.31 | 0.572015 | 0.943 |
| MB21D1   | 0.31 | 0.572016 | 0.943 |
| MCM3     | 0.31 | 0.591467 | 0.946 |
| METTTL2B | 0.31 | 0.572016 | 0.943 |
| MFSD8    | 0.31 | 0.572016 | 0.943 |
| MLIP     | 0.31 | 0.572016 | 0.943 |
| MMGT1    | 0.31 | 0.591468 | 0.946 |
| MNT      | 0.31 | 0.572016 | 0.943 |
| MRO      | 0.31 | 0.572015 | 0.943 |
| MUSTN1   | 0.31 | 0.572016 | 0.943 |
| MYOG     | 0.31 | 0.591467 | 0.946 |
| NEIL2    | 0.31 | 0.572016 | 0.943 |
| NUDT10   | 0.31 | 0.572016 | 0.943 |
| NUP98    | 0.31 | 0.572016 | 0.943 |
| OAS1     | 0.31 | 0.572015 | 0.943 |
| OR51L1   | 0.31 | 0.572016 | 0.943 |
| OR7G1    | 0.31 | 0.572016 | 0.943 |
| PARVG    | 0.31 | 0.572016 | 0.943 |
| PCDH11Y  | 0.31 | 0.572016 | 0.943 |
| PEX5L    | 0.31 | 0.572016 | 0.943 |
| PHLDB3   | 0.31 | 0.612099 | 0.948 |

|          |      |          |       |
|----------|------|----------|-------|
| PITX3    | 0.31 | 0.572016 | 0.943 |
| POLR2C   | 0.31 | 0.612099 | 0.948 |
| POR      | 0.31 | 0.572016 | 0.943 |
| POU5F1   | 0.31 | 0.591468 | 0.946 |
| PRDX6    | 0.31 | 0.572015 | 0.943 |
| PRPS1    | 0.31 | 0.572015 | 0.943 |
| PRSS22   | 0.31 | 0.572016 | 0.943 |
| PSMA1    | 0.31 | 0.572016 | 0.943 |
| PTPRM    | 0.31 | 0.572016 | 0.943 |
| RECQL4   | 0.31 | 0.572016 | 0.943 |
| RHOXF1   | 0.31 | 0.572015 | 0.943 |
| RNF8     | 0.31 | 0.572016 | 0.943 |
| SAMD4A   | 0.31 | 0.572016 | 0.943 |
| SCLT1    | 0.31 | 0.572016 | 0.943 |
| SCNN1A   | 0.31 | 0.572016 | 0.943 |
| SEC14L3  | 0.31 | 0.572016 | 0.943 |
| SELPLG   | 0.31 | 0.572016 | 0.943 |
| SEPP1    | 0.31 | 0.572016 | 0.943 |
| SHARPIN  | 0.31 | 0.572016 | 0.943 |
| SIGMAR1  | 0.31 | 0.572016 | 0.943 |
| SLC17A1  | 0.31 | 0.572016 | 0.943 |
| SLC25A29 | 0.31 | 0.572016 | 0.943 |
| SLC9A4   | 0.31 | 0.572015 | 0.943 |
| SLC9C1   | 0.31 | 0.572016 | 0.943 |
| TAF1L    | 0.31 | 0.572016 | 0.943 |
| TIMM50   | 0.31 | 0.572016 | 0.943 |
| TMCO3    | 0.31 | 0.572016 | 0.943 |
| TMEM132E | 0.31 | 0.591468 | 0.946 |
| TMEM26   | 0.31 | 0.572016 | 0.943 |
| TMEM55B  | 0.31 | 0.572015 | 0.943 |
| TNK2     | 0.31 | 0.572016 | 0.943 |
| TNNI3    | 0.31 | 0.591467 | 0.946 |
| TP53INP1 | 0.31 | 0.572016 | 0.943 |
| TTYH1    | 0.31 | 0.591468 | 0.946 |
| UCK1     | 0.31 | 0.572016 | 0.943 |
| UPF2     | 0.31 | 0.612099 | 0.948 |
| USP29    | 0.31 | 0.572016 | 0.943 |
| UTS2     | 0.31 | 0.572016 | 0.943 |
| VN1R4    | 0.31 | 0.572016 | 0.943 |
| VWC2     | 0.31 | 0.572016 | 0.943 |
| WDR53    | 0.31 | 0.591468 | 0.946 |
| WEE1     | 0.31 | 0.658246 | 0.958 |
| ZFP112   | 0.31 | 0.591468 | 0.946 |
| ZNF219   | 0.31 | 0.612099 | 0.948 |
| ZNF257   | 0.31 | 0.572016 | 0.943 |
| ZNF362   | 0.31 | 0.572016 | 0.943 |
| ZNF397   | 0.31 | 0.572015 | 0.943 |

|           |      |          |       |
|-----------|------|----------|-------|
| ZNF562    | 0.31 | 0.572016 | 0.943 |
| ALPP      | 0.32 | 0.56016  | 0.943 |
| ANKRD20A3 | 0.32 | 0.56016  | 0.943 |
| ARL9      | 0.32 | 0.560159 | 0.943 |
| ATPAF2    | 0.32 | 0.56016  | 0.943 |
| BLOC1S1   | 0.32 | 0.560159 | 0.943 |
| BTBD1     | 0.32 | 0.56016  | 0.943 |
| C13orf35  | 0.32 | 0.56016  | 0.943 |
| C16orf13  | 0.32 | 0.579872 | 0.943 |
| C19orf48  | 0.32 | 0.56016  | 0.943 |
| C2orf27A  | 0.32 | 0.579871 | 0.943 |
| C3orf22   | 0.32 | 0.579871 | 0.943 |
| C6orf47   | 0.32 | 0.579871 | 0.943 |
| C6orf48   | 0.32 | 0.56016  | 0.943 |
| CA4       | 0.32 | 0.560159 | 0.943 |
| CD79B     | 0.32 | 0.56016  | 0.943 |
| CELA3B    | 0.32 | 0.56016  | 0.943 |
| CLDN20    | 0.32 | 0.56016  | 0.943 |
| COBL      | 0.32 | 0.56016  | 0.943 |
| CSF1      | 0.32 | 0.56016  | 0.943 |
| DAZ1      | 0.32 | 0.560159 | 0.943 |
| DAZ2      | 0.32 | 0.56016  | 0.943 |
| DAZ4      | 0.32 | 0.560159 | 0.943 |
| DENND5A   | 0.32 | 0.560159 | 0.943 |
| DFNB59    | 0.32 | 0.560159 | 0.943 |
| DIDO1     | 0.32 | 0.560159 | 0.943 |
| DTWD2     | 0.32 | 0.560159 | 0.943 |
| DZANK1    | 0.32 | 0.56016  | 0.943 |
| EDNRA     | 0.32 | 0.56016  | 0.943 |
| EPB41L1   | 0.32 | 0.56016  | 0.943 |
| EPO       | 0.32 | 0.560159 | 0.943 |
| F12       | 0.32 | 0.56016  | 0.943 |
| FAHD2B    | 0.32 | 0.560159 | 0.943 |
| FAM177B   | 0.32 | 0.56016  | 0.943 |
| FAM189A1  | 0.32 | 0.56016  | 0.943 |
| FAM210A   | 0.32 | 0.56016  | 0.943 |
| FAM46C    | 0.32 | 0.560159 | 0.943 |
| FCN3      | 0.32 | 0.579871 | 0.943 |
| GALR3     | 0.32 | 0.56016  | 0.943 |
| GINS3     | 0.32 | 0.560159 | 0.943 |
| HEY2      | 0.32 | 0.56016  | 0.943 |
| HMGN3     | 0.32 | 0.56016  | 0.943 |
| HMSD      | 0.32 | 0.56016  | 0.943 |
| HPCAL1    | 0.32 | 0.560159 | 0.943 |
| IL17RD    | 0.32 | 0.601099 | 0.947 |
| KIF19     | 0.32 | 0.56016  | 0.943 |
| KIF21A    | 0.32 | 0.560159 | 0.943 |

|          |      |          |       |
|----------|------|----------|-------|
| KLHL13   | 0.32 | 0.560159 | 0.943 |
| KRTAP5-5 | 0.32 | 0.56016  | 0.943 |
| LCE1A    | 0.32 | 0.560159 | 0.943 |
| LDHAL6B  | 0.32 | 0.560159 | 0.943 |
| LDHB     | 0.32 | 0.560159 | 0.943 |
| LRP8     | 0.32 | 0.560159 | 0.943 |
| LTA      | 0.32 | 0.560159 | 0.943 |
| MAZ      | 0.32 | 0.56016  | 0.943 |
| METAP2   | 0.32 | 0.601098 | 0.947 |
| MFAP3L   | 0.32 | 0.56016  | 0.943 |
| MORN1    | 0.32 | 0.579872 | 0.943 |
| MTBP     | 0.32 | 0.56016  | 0.943 |
| MTO1     | 0.32 | 0.56016  | 0.943 |
| MUC19    | 0.32 | 0.56016  | 0.943 |
| MYL10    | 0.32 | 0.56016  | 0.943 |
| NAA10    | 0.32 | 0.579871 | 0.943 |
| NEK7     | 0.32 | 0.560159 | 0.943 |
| NPC1L1   | 0.32 | 0.560159 | 0.943 |
| NR2C2AP  | 0.32 | 0.579871 | 0.943 |
| NUDT16L1 | 0.32 | 0.56016  | 0.943 |
| NXN      | 0.32 | 0.56016  | 0.943 |
| OPRM1    | 0.32 | 0.56016  | 0.943 |
| OR13C4   | 0.32 | 0.560159 | 0.943 |
| PAGR1    | 0.32 | 0.56016  | 0.943 |
| PDE4B    | 0.32 | 0.560159 | 0.943 |
| PIGH     | 0.32 | 0.56016  | 0.943 |
| PLXDC1   | 0.32 | 0.579871 | 0.943 |
| POLH     | 0.32 | 0.560159 | 0.943 |
| PPP2R2C  | 0.32 | 0.56016  | 0.943 |
| PRR15L   | 0.32 | 0.560159 | 0.943 |
| PSAT1    | 0.32 | 0.56016  | 0.943 |
| PSMB6    | 0.32 | 0.560159 | 0.943 |
| PTPDC1   | 0.32 | 0.579871 | 0.943 |
| QRSL1    | 0.32 | 0.560159 | 0.943 |
| RABGAP1L | 0.32 | 0.579871 | 0.943 |
| RAP1GAP  | 0.32 | 0.56016  | 0.943 |
| RAP2C    | 0.32 | 0.56016  | 0.943 |
| RARS     | 0.32 | 0.601098 | 0.947 |
| RGS1     | 0.32 | 0.56016  | 0.943 |
| RPGR     | 0.32 | 0.579872 | 0.943 |
| SCAND3   | 0.32 | 0.579871 | 0.943 |
| SCAPER   | 0.32 | 0.56016  | 0.943 |
| SLC2A13  | 0.32 | 0.56016  | 0.943 |
| SLITRK3  | 0.32 | 0.56016  | 0.943 |
| SPP2     | 0.32 | 0.56016  | 0.943 |
| ST18     | 0.32 | 0.56016  | 0.943 |
| SYPL1    | 0.32 | 0.56016  | 0.943 |

|           |      |          |       |
|-----------|------|----------|-------|
| TAPBPL    | 0.32 | 0.579871 | 0.943 |
| TBCE      | 0.32 | 0.579871 | 0.943 |
| TBL2      | 0.32 | 0.56016  | 0.943 |
| TCEAL1    | 0.32 | 0.560159 | 0.943 |
| TJP1      | 0.32 | 0.56016  | 0.943 |
| TLX1      | 0.32 | 0.56016  | 0.943 |
| TMEM41A   | 0.32 | 0.56016  | 0.943 |
| TSPYL5    | 0.32 | 0.579871 | 0.943 |
| UPK3B     | 0.32 | 0.579871 | 0.943 |
| USP15     | 0.32 | 0.579871 | 0.943 |
| VSIG10L   | 0.32 | 0.579871 | 0.943 |
| WFDC5     | 0.32 | 0.560159 | 0.943 |
| XAGE5     | 0.32 | 0.560159 | 0.943 |
| XPR1      | 0.32 | 0.56016  | 0.943 |
| ZDHHC22   | 0.32 | 0.579871 | 0.943 |
| ZFAND4    | 0.32 | 0.56016  | 0.943 |
| ZFYVE28   | 0.32 | 0.56016  | 0.943 |
| ZNF385C   | 0.32 | 0.579871 | 0.943 |
| ZNF391    | 0.32 | 0.56016  | 0.943 |
| ZNF879    | 0.32 | 0.560159 | 0.943 |
| ZSCAN30   | 0.32 | 0.560159 | 0.943 |
| ABAT      | 0.33 | 0.548343 | 0.942 |
| ABHD17A   | 0.33 | 0.548343 | 0.942 |
| AHRR      | 0.33 | 0.548344 | 0.942 |
| AHSA2     | 0.33 | 0.548344 | 0.942 |
| ANKRD20A2 | 0.33 | 0.548343 | 0.942 |
| ARFGAP1   | 0.33 | 0.548343 | 0.942 |
| ATP6V1E2  | 0.33 | 0.548344 | 0.942 |
| BAG3      | 0.33 | 0.548344 | 0.942 |
| BCKDHA    | 0.33 | 0.548343 | 0.942 |
| BIRC7     | 0.33 | 0.548344 | 0.942 |
| BOLL      | 0.33 | 0.568521 | 0.943 |
| BPIFB3    | 0.33 | 0.568521 | 0.943 |
| BRDT      | 0.33 | 0.548344 | 0.942 |
| C1orf116  | 0.33 | 0.548344 | 0.942 |
| C1orf56   | 0.33 | 0.548344 | 0.942 |
| C9orf62   | 0.33 | 0.548344 | 0.942 |
| CAMSAP1   | 0.33 | 0.548343 | 0.942 |
| CD160     | 0.33 | 0.548343 | 0.942 |
| CELSR1    | 0.33 | 0.568521 | 0.943 |
| CIRBP     | 0.33 | 0.548344 | 0.942 |
| CPNE9     | 0.33 | 0.548344 | 0.942 |
| CSF2RA    | 0.33 | 0.548343 | 0.942 |
| CST9      | 0.33 | 0.548343 | 0.942 |
| CTAGE4    | 0.33 | 0.568521 | 0.943 |
| CYP4A22   | 0.33 | 0.548344 | 0.942 |
| DCXR      | 0.33 | 0.548343 | 0.942 |

|          |      |          |       |
|----------|------|----------|-------|
| DDX11    | 0.33 | 0.548343 | 0.942 |
| DGKA     | 0.33 | 0.548343 | 0.942 |
| DHX40    | 0.33 | 0.548344 | 0.942 |
| DLG1     | 0.33 | 0.548343 | 0.942 |
| DPP10    | 0.33 | 0.548343 | 0.942 |
| DSCR4    | 0.33 | 0.548343 | 0.942 |
| ENKD1    | 0.33 | 0.548343 | 0.942 |
| ERCC1    | 0.33 | 0.548344 | 0.942 |
| FAM111B  | 0.33 | 0.548343 | 0.942 |
| FAM134B  | 0.33 | 0.548343 | 0.942 |
| FAM161A  | 0.33 | 0.548343 | 0.942 |
| FAM198A  | 0.33 | 0.548343 | 0.942 |
| FAM78A   | 0.33 | 0.548343 | 0.942 |
| FAM83E   | 0.33 | 0.548343 | 0.942 |
| FBXO18   | 0.33 | 0.568521 | 0.943 |
| FIGF     | 0.33 | 0.548343 | 0.942 |
| FLT4     | 0.33 | 0.548343 | 0.942 |
| GGT7     | 0.33 | 0.548343 | 0.942 |
| GPATCH4  | 0.33 | 0.548343 | 0.942 |
| GPR110   | 0.33 | 0.568521 | 0.943 |
| GRIA4    | 0.33 | 0.548343 | 0.942 |
| GRIN2C   | 0.33 | 0.548344 | 0.942 |
| HIST1H3D | 0.33 | 0.568521 | 0.943 |
| HIST1H3E | 0.33 | 0.548343 | 0.942 |
| IDH3B    | 0.33 | 0.548344 | 0.942 |
| IFT46    | 0.33 | 0.548344 | 0.942 |
| KAZALD1  | 0.33 | 0.548344 | 0.942 |
| KCNH5    | 0.33 | 0.548343 | 0.942 |
| KRTAP3-1 | 0.33 | 0.548344 | 0.942 |
| LMO7     | 0.33 | 0.568521 | 0.943 |
| LY86     | 0.33 | 0.568521 | 0.943 |
| MARS2    | 0.33 | 0.548343 | 0.942 |
| MTRF1    | 0.33 | 0.548343 | 0.942 |
| MYEF2    | 0.33 | 0.548344 | 0.942 |
| NIT1     | 0.33 | 0.548343 | 0.942 |
| NPY1R    | 0.33 | 0.548344 | 0.942 |
| NUDT15   | 0.33 | 0.548343 | 0.942 |
| OGFOD2   | 0.33 | 0.548343 | 0.942 |
| OPRK1    | 0.33 | 0.548344 | 0.942 |
| OR4K14   | 0.33 | 0.548343 | 0.942 |
| OR6C65   | 0.33 | 0.548343 | 0.942 |
| OR6X1    | 0.33 | 0.548343 | 0.942 |
| OSMR     | 0.33 | 0.548343 | 0.942 |
| PDXK     | 0.33 | 0.548343 | 0.942 |
| PHYKPL   | 0.33 | 0.548343 | 0.942 |
| PMM1     | 0.33 | 0.548344 | 0.942 |
| POLD3    | 0.33 | 0.613216 | 0.948 |

|          |      |          |       |
|----------|------|----------|-------|
| PPP1R26  | 0.33 | 0.548344 | 0.942 |
| PRR5     | 0.33 | 0.568521 | 0.943 |
| RASAL3   | 0.33 | 0.568521 | 0.943 |
| RDH12    | 0.33 | 0.568521 | 0.943 |
| RIMBP3C  | 0.33 | 0.548343 | 0.942 |
| RPAP1    | 0.33 | 0.568521 | 0.943 |
| S100A7L2 | 0.33 | 0.59014  | 0.946 |
| SIDT1    | 0.33 | 0.548344 | 0.942 |
| SIGIRR   | 0.33 | 0.59014  | 0.946 |
| SLC27A4  | 0.33 | 0.548343 | 0.942 |
| SLFN12L  | 0.33 | 0.548343 | 0.942 |
| SNX17    | 0.33 | 0.548344 | 0.942 |
| SPAST    | 0.33 | 0.548343 | 0.942 |
| SPCS3    | 0.33 | 0.548343 | 0.942 |
| SSTR5    | 0.33 | 0.548343 | 0.942 |
| SSX3     | 0.33 | 0.548344 | 0.942 |
| SYDE1    | 0.33 | 0.548343 | 0.942 |
| TM4SF19  | 0.33 | 0.548344 | 0.942 |
| TMEM114  | 0.33 | 0.59014  | 0.946 |
| TMEM181  | 0.33 | 0.548344 | 0.942 |
| TMEM55A  | 0.33 | 0.548343 | 0.942 |
| TMEM88   | 0.33 | 0.548343 | 0.942 |
| TNIP2    | 0.33 | 0.548343 | 0.942 |
| TOM1L1   | 0.33 | 0.548343 | 0.942 |
| TOPORS   | 0.33 | 0.548343 | 0.942 |
| TPSAB1   | 0.33 | 0.548344 | 0.942 |
| TRIM26   | 0.33 | 0.548343 | 0.942 |
| VAMP1    | 0.33 | 0.548343 | 0.942 |
| WNK2     | 0.33 | 0.568521 | 0.943 |
| YTHDF3   | 0.33 | 0.568521 | 0.943 |
| ZC3H4    | 0.33 | 0.568521 | 0.943 |
| ZFP1     | 0.33 | 0.548343 | 0.942 |
| ZKSCAN7  | 0.33 | 0.548343 | 0.942 |
| ZNF778   | 0.33 | 0.548343 | 0.942 |
| ZSCAN29  | 0.33 | 0.548343 | 0.942 |
| ANKRD39  | 0.34 | 0.536709 | 0.939 |
| ARHGEF33 | 0.34 | 0.536709 | 0.939 |
| ATG5     | 0.34 | 0.536709 | 0.939 |
| ATP5J2   | 0.34 | 0.55721  | 0.943 |
| C1orf63  | 0.34 | 0.53671  | 0.939 |
| C2orf47  | 0.34 | 0.536709 | 0.939 |
| C2orf54  | 0.34 | 0.53671  | 0.939 |
| C2orf62  | 0.34 | 0.53671  | 0.939 |
| C7orf33  | 0.34 | 0.536709 | 0.939 |
| C9orf172 | 0.34 | 0.536709 | 0.939 |
| CAMK2N2  | 0.34 | 0.53671  | 0.939 |
| CCDC36   | 0.34 | 0.53671  | 0.939 |

|           |      |          |       |
|-----------|------|----------|-------|
| CD276     | 0.34 | 0.55721  | 0.943 |
| CDK10     | 0.34 | 0.53671  | 0.939 |
| CDKN1B    | 0.34 | 0.53671  | 0.939 |
| CELA2B    | 0.34 | 0.536709 | 0.939 |
| CEP68     | 0.34 | 0.53671  | 0.939 |
| CGN       | 0.34 | 0.536709 | 0.939 |
| CYP27A1   | 0.34 | 0.55721  | 0.943 |
| CYP27B1   | 0.34 | 0.55721  | 0.943 |
| CYP4B1    | 0.34 | 0.55721  | 0.943 |
| DHRS13    | 0.34 | 0.53671  | 0.939 |
| DKK2      | 0.34 | 0.536709 | 0.939 |
| ESM1      | 0.34 | 0.53671  | 0.939 |
| ESRP2     | 0.34 | 0.55721  | 0.943 |
| FAM217A   | 0.34 | 0.53671  | 0.939 |
| FCGR2C    | 0.34 | 0.602844 | 0.947 |
| FGF19     | 0.34 | 0.536709 | 0.939 |
| FN3K      | 0.34 | 0.536709 | 0.939 |
| GARNL3    | 0.34 | 0.536709 | 0.939 |
| GJB5      | 0.34 | 0.53671  | 0.939 |
| GRIP2     | 0.34 | 0.536709 | 0.939 |
| GTF2H5    | 0.34 | 0.536709 | 0.939 |
| HAPLN1    | 0.34 | 0.55721  | 0.943 |
| HHIP      | 0.34 | 0.55721  | 0.943 |
| HIST1H2AH | 0.34 | 0.53671  | 0.939 |
| HIST1H4H  | 0.34 | 0.536709 | 0.939 |
| HMHB1     | 0.34 | 0.628726 | 0.951 |
| HSPB8     | 0.34 | 0.536709 | 0.939 |
| IQCA1     | 0.34 | 0.55721  | 0.943 |
| ITGA4     | 0.34 | 0.536709 | 0.939 |
| LDHA      | 0.34 | 0.536709 | 0.939 |
| LILRA1    | 0.34 | 0.53671  | 0.939 |
| MAP3K4    | 0.34 | 0.536709 | 0.939 |
| MAPKAPK3  | 0.34 | 0.536709 | 0.939 |
| MEX3A     | 0.34 | 0.53671  | 0.939 |
| MOCS3     | 0.34 | 0.53671  | 0.939 |
| MORC3     | 0.34 | 0.53671  | 0.939 |
| MSRB3     | 0.34 | 0.53671  | 0.939 |
| MTMR2     | 0.34 | 0.55721  | 0.943 |
| MUC5AC    | 0.34 | 0.536709 | 0.939 |
| NCOA7     | 0.34 | 0.53671  | 0.939 |
| NDRG1     | 0.34 | 0.53671  | 0.939 |
| OR11H4    | 0.34 | 0.536709 | 0.939 |
| OR13H1    | 0.34 | 0.536709 | 0.939 |
| OR4C11    | 0.34 | 0.536709 | 0.939 |
| OR4N5     | 0.34 | 0.536709 | 0.939 |
| OSTF1     | 0.34 | 0.536709 | 0.939 |
| PCSK9     | 0.34 | 0.53671  | 0.939 |

|          |      |          |       |
|----------|------|----------|-------|
| PITHD1   | 0.34 | 0.53671  | 0.939 |
| PLA2G12A | 0.34 | 0.53671  | 0.939 |
| PLOD3    | 0.34 | 0.536709 | 0.939 |
| PNLDC1   | 0.34 | 0.536709 | 0.939 |
| POLR3K   | 0.34 | 0.53671  | 0.939 |
| PQLC2    | 0.34 | 0.557211 | 0.943 |
| PRKCQ    | 0.34 | 0.536709 | 0.939 |
| PRSS36   | 0.34 | 0.536709 | 0.939 |
| PTGES    | 0.34 | 0.536709 | 0.939 |
| RALA     | 0.34 | 0.53671  | 0.939 |
| RBM19    | 0.34 | 0.55721  | 0.943 |
| RBPJ     | 0.34 | 0.53671  | 0.939 |
| RIN1     | 0.34 | 0.53671  | 0.939 |
| RNF112   | 0.34 | 0.55721  | 0.943 |
| RNF220   | 0.34 | 0.536709 | 0.939 |
| RNMT     | 0.34 | 0.536709 | 0.939 |
| RPS4Y2   | 0.34 | 0.536709 | 0.939 |
| RRAGC    | 0.34 | 0.557211 | 0.943 |
| RSU1     | 0.34 | 0.557211 | 0.943 |
| SCN3A    | 0.34 | 0.53671  | 0.939 |
| SERPINA6 | 0.34 | 0.53671  | 0.939 |
| SFXN3    | 0.34 | 0.55721  | 0.943 |
| SLC12A2  | 0.34 | 0.536709 | 0.939 |
| SLC2A1   | 0.34 | 0.53671  | 0.939 |
| SLC6A2   | 0.34 | 0.536709 | 0.939 |
| SLC7A3   | 0.34 | 0.53671  | 0.939 |
| SLC9A9   | 0.34 | 0.536709 | 0.939 |
| SLIT3    | 0.34 | 0.536709 | 0.939 |
| SMG6     | 0.34 | 0.55721  | 0.943 |
| SPATS2L  | 0.34 | 0.536709 | 0.939 |
| SPSB1    | 0.34 | 0.53671  | 0.939 |
| SSB      | 0.34 | 0.536709 | 0.939 |
| SYT15    | 0.34 | 0.53671  | 0.939 |
| SYTL5    | 0.34 | 0.536709 | 0.939 |
| TARS     | 0.34 | 0.602843 | 0.947 |
| TAS2R50  | 0.34 | 0.53671  | 0.939 |
| TBC1D12  | 0.34 | 0.53671  | 0.939 |
| TIMM8B   | 0.34 | 0.53671  | 0.939 |
| TMED1    | 0.34 | 0.536709 | 0.939 |
| TMEM56   | 0.34 | 0.536709 | 0.939 |
| TNIP1    | 0.34 | 0.579389 | 0.943 |
| TNNI1    | 0.34 | 0.536709 | 0.939 |
| TP53I3   | 0.34 | 0.536709 | 0.939 |
| TRMT13   | 0.34 | 0.536709 | 0.939 |
| TRUB2    | 0.34 | 0.55721  | 0.943 |
| TSPAN6   | 0.34 | 0.536709 | 0.939 |
| UBE2C    | 0.34 | 0.536709 | 0.939 |

|          |      |          |       |
|----------|------|----------|-------|
| UHRF1    | 0.34 | 0.557211 | 0.943 |
| ULK4     | 0.34 | 0.536709 | 0.939 |
| USP27X   | 0.34 | 0.689338 | 0.961 |
| WDR11    | 0.34 | 0.53671  | 0.939 |
| WDR61    | 0.34 | 0.536709 | 0.939 |
| XIRP1    | 0.34 | 0.536709 | 0.939 |
| ZNF189   | 0.34 | 0.55721  | 0.943 |
| ZNF540   | 0.34 | 0.55721  | 0.943 |
| ZNF586   | 0.34 | 0.53671  | 0.939 |
| ZNF75A   | 0.34 | 0.53671  | 0.939 |
| ANGPTL7  | 0.35 | 0.525142 | 0.938 |
| ANKRD13C | 0.35 | 0.568695 | 0.943 |
| APBA2    | 0.35 | 0.525142 | 0.938 |
| APC2     | 0.35 | 0.525141 | 0.938 |
| ARHGEF7  | 0.35 | 0.525141 | 0.938 |
| ATP5I    | 0.35 | 0.525142 | 0.938 |
| ATP6AP1  | 0.35 | 0.568695 | 0.943 |
| ATXN7L1  | 0.35 | 0.568695 | 0.943 |
| BBIP1    | 0.35 | 0.525142 | 0.938 |
| BTG4     | 0.35 | 0.525142 | 0.938 |
| C19orf80 | 0.35 | 0.525141 | 0.938 |
| C4orf33  | 0.35 | 0.525142 | 0.938 |
| C5orf67  | 0.35 | 0.525142 | 0.938 |
| CATSPERB | 0.35 | 0.525142 | 0.938 |
| CCBL2    | 0.35 | 0.525142 | 0.938 |
| CCDC74B  | 0.35 | 0.525142 | 0.938 |
| CCT8L2   | 0.35 | 0.525142 | 0.938 |
| CECR6    | 0.35 | 0.525141 | 0.938 |
| CNKSR1   | 0.35 | 0.525141 | 0.938 |
| COPS6    | 0.35 | 0.525142 | 0.938 |
| COQ9     | 0.35 | 0.525142 | 0.938 |
| CTR9     | 0.35 | 0.568695 | 0.943 |
| CYB5R2   | 0.35 | 0.525142 | 0.938 |
| DCTN3    | 0.35 | 0.525142 | 0.938 |
| DDHD2    | 0.35 | 0.546066 | 0.942 |
| DECR2    | 0.35 | 0.525142 | 0.938 |
| DPY30    | 0.35 | 0.525142 | 0.938 |
| EFEMP1   | 0.35 | 0.525141 | 0.938 |
| ELANE    | 0.35 | 0.525142 | 0.938 |
| ETV1     | 0.35 | 0.525142 | 0.938 |
| GLUL     | 0.35 | 0.525142 | 0.938 |
| GNG13    | 0.35 | 0.546066 | 0.942 |
| GPRC6A   | 0.35 | 0.525142 | 0.938 |
| GREB1    | 0.35 | 0.525142 | 0.938 |
| HECTD1   | 0.35 | 0.525142 | 0.938 |
| HELZ     | 0.35 | 0.525142 | 0.938 |
| HHAT     | 0.35 | 0.525142 | 0.938 |

|           |      |          |       |
|-----------|------|----------|-------|
| HMGN1     | 0.35 | 0.525142 | 0.938 |
| HTATSF1   | 0.35 | 0.546066 | 0.942 |
| IL13      | 0.35 | 0.525141 | 0.938 |
| IQCH      | 0.35 | 0.525142 | 0.938 |
| KBTBD13   | 0.35 | 0.525142 | 0.938 |
| KDELC2    | 0.35 | 0.525142 | 0.938 |
| KRTAP9-3  | 0.35 | 0.525142 | 0.938 |
| LNPEP     | 0.35 | 0.525142 | 0.938 |
| MAP6      | 0.35 | 0.546066 | 0.942 |
| METTL23   | 0.35 | 0.525142 | 0.938 |
| MGAT4D    | 0.35 | 0.680972 | 0.961 |
| NAGA      | 0.35 | 0.525142 | 0.938 |
| NEBL      | 0.35 | 0.525142 | 0.938 |
| NEK4      | 0.35 | 0.525142 | 0.938 |
| NFKBIB    | 0.35 | 0.546066 | 0.942 |
| NLRP14    | 0.35 | 0.525142 | 0.938 |
| NMNAT3    | 0.35 | 0.525142 | 0.938 |
| NYAP1     | 0.35 | 0.568695 | 0.943 |
| OR5B12    | 0.35 | 0.525142 | 0.938 |
| PGBD5     | 0.35 | 0.525142 | 0.938 |
| PLA2G4C   | 0.35 | 0.525142 | 0.938 |
| PRR19     | 0.35 | 0.546065 | 0.942 |
| PRSS55    | 0.35 | 0.525142 | 0.938 |
| PSG5      | 0.35 | 0.525142 | 0.938 |
| PSKH1     | 0.35 | 0.525142 | 0.938 |
| PTPRE     | 0.35 | 0.546065 | 0.942 |
| PTTG1IP   | 0.35 | 0.525141 | 0.938 |
| RASA3     | 0.35 | 0.525142 | 0.938 |
| RECQL     | 0.35 | 0.546066 | 0.942 |
| RENB      | 0.35 | 0.525142 | 0.938 |
| SERTAD4   | 0.35 | 0.525142 | 0.938 |
| SLC29A4   | 0.35 | 0.525142 | 0.938 |
| SMR3A     | 0.35 | 0.546065 | 0.942 |
| TANGO6    | 0.35 | 0.546066 | 0.942 |
| TAS2R10   | 0.35 | 0.525142 | 0.938 |
| TCTEX1D1  | 0.35 | 0.525142 | 0.938 |
| TFAM      | 0.35 | 0.546066 | 0.942 |
| TMBIM6    | 0.35 | 0.525141 | 0.938 |
| TMEM74B   | 0.35 | 0.525142 | 0.938 |
| TMPRSS2   | 0.35 | 0.546066 | 0.942 |
| TNFRSF13B | 0.35 | 0.525142 | 0.938 |
| TNXB      | 0.35 | 0.525142 | 0.938 |
| TTC30A    | 0.35 | 0.525142 | 0.938 |
| TTC33     | 0.35 | 0.525142 | 0.938 |
| TTC38     | 0.35 | 0.525142 | 0.938 |
| TTC8      | 0.35 | 0.525142 | 0.938 |
| UBOX5     | 0.35 | 0.525141 | 0.938 |

|          |      |          |       |
|----------|------|----------|-------|
| UNG      | 0.35 | 0.525142 | 0.938 |
| USP17L21 | 0.35 | 0.525142 | 0.938 |
| USP53    | 0.35 | 0.525142 | 0.938 |
| VAC14    | 0.35 | 0.525142 | 0.938 |
| WDR90    | 0.35 | 0.525142 | 0.938 |
| ZMYND10  | 0.35 | 0.546065 | 0.942 |
| ZNF229   | 0.35 | 0.525141 | 0.938 |
| ZNF546   | 0.35 | 0.525141 | 0.938 |
| ZNF613   | 0.35 | 0.525142 | 0.938 |
| ADRA1B   | 0.36 | 0.535    | 0.939 |
| ALOX12   | 0.36 | 0.513719 | 0.933 |
| ANKRD63  | 0.36 | 0.51372  | 0.933 |
| APOL2    | 0.36 | 0.513719 | 0.933 |
| ASPHD1   | 0.36 | 0.513719 | 0.933 |
| B3GNT9   | 0.36 | 0.513719 | 0.933 |
| BBS7     | 0.36 | 0.51372  | 0.933 |
| BCKDHB   | 0.36 | 0.513719 | 0.933 |
| BSDC1    | 0.36 | 0.51372  | 0.933 |
| C1orf198 | 0.36 | 0.535    | 0.939 |
| C2orf42  | 0.36 | 0.513719 | 0.933 |
| C6orf58  | 0.36 | 0.51372  | 0.933 |
| CACNG5   | 0.36 | 0.513719 | 0.933 |
| CAST     | 0.36 | 0.513719 | 0.933 |
| CD109    | 0.36 | 0.51372  | 0.933 |
| CFHR5    | 0.36 | 0.513719 | 0.933 |
| CGB1     | 0.36 | 0.51372  | 0.933 |
| CHID1    | 0.36 | 0.513719 | 0.933 |
| COL8A2   | 0.36 | 0.513719 | 0.933 |
| CXCL10   | 0.36 | 0.513719 | 0.933 |
| CXorf48  | 0.36 | 0.51372  | 0.933 |
| DDX49    | 0.36 | 0.513719 | 0.933 |
| DFFB     | 0.36 | 0.513719 | 0.933 |
| DHRS7C   | 0.36 | 0.513719 | 0.933 |
| DRG2     | 0.36 | 0.513719 | 0.933 |
| DUSP27   | 0.36 | 0.51372  | 0.933 |
| DVL3     | 0.36 | 0.513719 | 0.933 |
| DYNLRB2  | 0.36 | 0.51372  | 0.933 |
| ELSPBP1  | 0.36 | 0.513719 | 0.933 |
| FAM231A  | 0.36 | 0.535001 | 0.939 |
| FAM231C  | 0.36 | 0.535001 | 0.939 |
| FDPS     | 0.36 | 0.51372  | 0.933 |
| FILIP1L  | 0.36 | 0.51372  | 0.933 |
| FOXR1    | 0.36 | 0.513719 | 0.933 |
| GBF1     | 0.36 | 0.513719 | 0.933 |
| GHRHR    | 0.36 | 0.513719 | 0.933 |
| GSG1L    | 0.36 | 0.535    | 0.939 |
| HMG5     | 0.36 | 0.513719 | 0.933 |

|           |      |          |       |
|-----------|------|----------|-------|
| HOXC11    | 0.36 | 0.535    | 0.939 |
| IFNGR2    | 0.36 | 0.513719 | 0.933 |
| IGLL1     | 0.36 | 0.513719 | 0.933 |
| INCENP    | 0.36 | 0.535001 | 0.939 |
| KAL1      | 0.36 | 0.513719 | 0.933 |
| KCNA10    | 0.36 | 0.513719 | 0.933 |
| KCNA3     | 0.36 | 0.51372  | 0.933 |
| KCNIP1    | 0.36 | 0.513719 | 0.933 |
| KRTAP17-1 | 0.36 | 0.51372  | 0.933 |
| LETM1     | 0.36 | 0.513719 | 0.933 |
| LRRC39    | 0.36 | 0.513719 | 0.933 |
| LRRC3B    | 0.36 | 0.51372  | 0.933 |
| LYSMD1    | 0.36 | 0.513719 | 0.933 |
| MAD2L1BP  | 0.36 | 0.513719 | 0.933 |
| MDP1      | 0.36 | 0.513719 | 0.933 |
| MGAT4C    | 0.36 | 0.51372  | 0.933 |
| MZT2B     | 0.36 | 0.513719 | 0.933 |
| NHLRC4    | 0.36 | 0.535001 | 0.939 |
| NIPAL3    | 0.36 | 0.513719 | 0.933 |
| NMUR1     | 0.36 | 0.513719 | 0.933 |
| NPIP6     | 0.36 | 0.535    | 0.939 |
| OCEL1     | 0.36 | 0.513719 | 0.933 |
| OR5K2     | 0.36 | 0.513719 | 0.933 |
| OR8K5     | 0.36 | 0.51372  | 0.933 |
| OSBPL2    | 0.36 | 0.513719 | 0.933 |
| PCDHGA12  | 0.36 | 0.513719 | 0.933 |
| PI3       | 0.36 | 0.513719 | 0.933 |
| PKMYT1    | 0.36 | 0.535001 | 0.939 |
| PLCD1     | 0.36 | 0.513719 | 0.933 |
| POLE      | 0.36 | 0.55798  | 0.943 |
| POLI      | 0.36 | 0.55798  | 0.943 |
| PRDM5     | 0.36 | 0.51372  | 0.933 |
| PRLR      | 0.36 | 0.513719 | 0.933 |
| PRMT2     | 0.36 | 0.513719 | 0.933 |
| PSMA5     | 0.36 | 0.582435 | 0.943 |
| PTPLAD1   | 0.36 | 0.513719 | 0.933 |
| RCCD1     | 0.36 | 0.535001 | 0.939 |
| RDH16     | 0.36 | 0.513719 | 0.933 |
| REG1A     | 0.36 | 0.513719 | 0.933 |
| RFX4      | 0.36 | 0.513719 | 0.933 |
| ROM1      | 0.36 | 0.51372  | 0.933 |
| SASS6     | 0.36 | 0.535    | 0.939 |
| SERPINB3  | 0.36 | 0.513719 | 0.933 |
| SH2D7     | 0.36 | 0.51372  | 0.933 |
| SLC8A1    | 0.36 | 0.513719 | 0.933 |
| SOCS3     | 0.36 | 0.535001 | 0.939 |
| SPINK6    | 0.36 | 0.513719 | 0.933 |

|           |      |          |       |
|-----------|------|----------|-------|
| STAG1     | 0.36 | 0.535    | 0.939 |
| SYNGR1    | 0.36 | 0.513719 | 0.933 |
| TANK      | 0.36 | 0.513719 | 0.933 |
| TDRD15    | 0.36 | 0.513719 | 0.933 |
| THAP11    | 0.36 | 0.513719 | 0.933 |
| TLE3      | 0.36 | 0.513719 | 0.933 |
| TMEM125   | 0.36 | 0.51372  | 0.933 |
| TMEM214   | 0.36 | 0.513719 | 0.933 |
| TRIM65    | 0.36 | 0.513719 | 0.933 |
| TRMT44    | 0.36 | 0.513719 | 0.933 |
| TRPC5     | 0.36 | 0.513719 | 0.933 |
| TXNL1     | 0.36 | 0.51372  | 0.933 |
| UMODL1    | 0.36 | 0.513719 | 0.933 |
| URI1      | 0.36 | 0.513719 | 0.933 |
| USP48     | 0.36 | 0.513719 | 0.933 |
| VASH1     | 0.36 | 0.51372  | 0.933 |
| VSX2      | 0.36 | 0.535    | 0.939 |
| ZNF280D   | 0.36 | 0.513719 | 0.933 |
| ZNF749    | 0.36 | 0.513719 | 0.933 |
| ZNF792    | 0.36 | 0.51372  | 0.933 |
| ABI2      | 0.37 | 0.502471 | 0.932 |
| ADIRF     | 0.37 | 0.502471 | 0.932 |
| ADRBK1    | 0.37 | 0.523973 | 0.938 |
| ANK3      | 0.37 | 0.502471 | 0.932 |
| ARHGAP10  | 0.37 | 0.502471 | 0.932 |
| ATOH8     | 0.37 | 0.502471 | 0.932 |
| BCL2L2    | 0.37 | 0.502471 | 0.932 |
| C1GALT1C1 | 0.37 | 0.50247  | 0.932 |
| C1orf168  | 0.37 | 0.502471 | 0.932 |
| C20orf144 | 0.37 | 0.502471 | 0.932 |
| CARD11    | 0.37 | 0.50247  | 0.932 |
| CASP6     | 0.37 | 0.50247  | 0.932 |
| CBLN2     | 0.37 | 0.502471 | 0.932 |
| CCDC3     | 0.37 | 0.50247  | 0.932 |
| CCT7      | 0.37 | 0.502471 | 0.932 |
| CD180     | 0.37 | 0.502471 | 0.932 |
| CD300LD   | 0.37 | 0.50247  | 0.932 |
| CDC20     | 0.37 | 0.547369 | 0.942 |
| CDRT15L2  | 0.37 | 0.502471 | 0.932 |
| CEACAM20  | 0.37 | 0.523973 | 0.938 |
| CHST15    | 0.37 | 0.502471 | 0.932 |
| CLN6      | 0.37 | 0.50247  | 0.932 |
| CTSE      | 0.37 | 0.50247  | 0.932 |
| CUEDC1    | 0.37 | 0.502471 | 0.932 |
| CYLC1     | 0.37 | 0.502471 | 0.932 |
| DPYS      | 0.37 | 0.50247  | 0.932 |
| ELF4      | 0.37 | 0.502471 | 0.932 |

|           |      |          |       |
|-----------|------|----------|-------|
| EPPIN     | 0.37 | 0.50247  | 0.932 |
| EXOC3L2   | 0.37 | 0.523973 | 0.938 |
| EZR       | 0.37 | 0.523972 | 0.938 |
| FAM184A   | 0.37 | 0.50247  | 0.932 |
| FAM207A   | 0.37 | 0.502471 | 0.932 |
| FAM208B   | 0.37 | 0.502471 | 0.932 |
| FASTKD2   | 0.37 | 0.502471 | 0.932 |
| FATE1     | 0.37 | 0.50247  | 0.932 |
| FHL5      | 0.37 | 0.502471 | 0.932 |
| FLJ44635  | 0.37 | 0.502471 | 0.932 |
| FUNDC1    | 0.37 | 0.502471 | 0.932 |
| GOLGA8N   | 0.37 | 0.502471 | 0.932 |
| GPR143    | 0.37 | 0.502471 | 0.932 |
| GPR149    | 0.37 | 0.50247  | 0.932 |
| GYPB      | 0.37 | 0.572302 | 0.943 |
| HPCA      | 0.37 | 0.502471 | 0.932 |
| HRASLS    | 0.37 | 0.50247  | 0.932 |
| HRH4      | 0.37 | 0.502471 | 0.932 |
| IGSF3     | 0.37 | 0.502471 | 0.932 |
| IL23A     | 0.37 | 0.50247  | 0.932 |
| INF2      | 0.37 | 0.50247  | 0.932 |
| KCNA4     | 0.37 | 0.50247  | 0.932 |
| KIF18B    | 0.37 | 0.502471 | 0.932 |
| KLHL32    | 0.37 | 0.502471 | 0.932 |
| LALBA     | 0.37 | 0.502471 | 0.932 |
| LHFPL1    | 0.37 | 0.50247  | 0.932 |
| LRRC37A2  | 0.37 | 0.502471 | 0.932 |
| MAF1      | 0.37 | 0.50247  | 0.932 |
| MAPK1IP1L | 0.37 | 0.50247  | 0.932 |
| MBD3L1    | 0.37 | 0.50247  | 0.932 |
| MCL1      | 0.37 | 0.523973 | 0.938 |
| MOSPD2    | 0.37 | 0.50247  | 0.932 |
| MRPL3     | 0.37 | 0.50247  | 0.932 |
| MSI2      | 0.37 | 0.50247  | 0.932 |
| MTFR1L    | 0.37 | 0.50247  | 0.932 |
| MVD       | 0.37 | 0.502471 | 0.932 |
| MXI1      | 0.37 | 0.523973 | 0.938 |
| NAT16     | 0.37 | 0.502471 | 0.932 |
| NOV       | 0.37 | 0.50247  | 0.932 |
| OPN3      | 0.37 | 0.502471 | 0.932 |
| OR5D18    | 0.37 | 0.502471 | 0.932 |
| OR7C1     | 0.37 | 0.502471 | 0.932 |
| PCDHAC1   | 0.37 | 0.523973 | 0.938 |
| PDCD10    | 0.37 | 0.502471 | 0.932 |
| PDZD3     | 0.37 | 0.502471 | 0.932 |
| PLK4      | 0.37 | 0.523972 | 0.938 |
| PPIAL4G   | 0.37 | 0.50247  | 0.932 |

|          |      |          |       |
|----------|------|----------|-------|
| PPIL6    | 0.37 | 0.502471 | 0.932 |
| PPP1R16B | 0.37 | 0.50247  | 0.932 |
| PRLH     | 0.37 | 0.50247  | 0.932 |
| PRMT5    | 0.37 | 0.599696 | 0.947 |
| PRSS1    | 0.37 | 0.502471 | 0.932 |
| PTGS1    | 0.37 | 0.50247  | 0.932 |
| PURA     | 0.37 | 0.502471 | 0.932 |
| RAB3C    | 0.37 | 0.502471 | 0.932 |
| RAB42    | 0.37 | 0.502471 | 0.932 |
| RAD54L   | 0.37 | 0.50247  | 0.932 |
| RCAN2    | 0.37 | 0.502471 | 0.932 |
| RNF122   | 0.37 | 0.50247  | 0.932 |
| RSPH10B  | 0.37 | 0.502471 | 0.932 |
| SCRG1    | 0.37 | 0.502471 | 0.932 |
| SERPINC1 | 0.37 | 0.502471 | 0.932 |
| SERPIND1 | 0.37 | 0.50247  | 0.932 |
| SHD      | 0.37 | 0.502471 | 0.932 |
| SLC30A8  | 0.37 | 0.502471 | 0.932 |
| SLC35F6  | 0.37 | 0.50247  | 0.932 |
| SLC7A8   | 0.37 | 0.502471 | 0.932 |
| SMIM19   | 0.37 | 0.502471 | 0.932 |
| SNIP1    | 0.37 | 0.523973 | 0.938 |
| SP110    | 0.37 | 0.502471 | 0.932 |
| SP3      | 0.37 | 0.502471 | 0.932 |
| SSH1     | 0.37 | 0.547369 | 0.942 |
| SULF1    | 0.37 | 0.502471 | 0.932 |
| TMEM129  | 0.37 | 0.50247  | 0.932 |
| TMEM132C | 0.37 | 0.523973 | 0.938 |
| TMEM9    | 0.37 | 0.502471 | 0.932 |
| TMIGD2   | 0.37 | 0.50247  | 0.932 |
| UIMC1    | 0.37 | 0.523973 | 0.938 |
| VPS37D   | 0.37 | 0.502471 | 0.932 |
| WIZ      | 0.37 | 0.502471 | 0.932 |
| WLS      | 0.37 | 0.50247  | 0.932 |
| YPEL4    | 0.37 | 0.50247  | 0.932 |
| ZNF160   | 0.37 | 0.502471 | 0.932 |
| ZNF496   | 0.37 | 0.502471 | 0.932 |
| ZNF624   | 0.37 | 0.502471 | 0.932 |
| ADORA1   | 0.38 | 0.491394 | 0.931 |
| AKT1     | 0.38 | 0.513155 | 0.933 |
| AMH      | 0.38 | 0.491393 | 0.931 |
| APEX2    | 0.38 | 0.491394 | 0.931 |
| ARMC3    | 0.38 | 0.491394 | 0.931 |
| ARRDC3   | 0.38 | 0.491394 | 0.931 |
| ASPG     | 0.38 | 0.491394 | 0.931 |
| ATP1A3   | 0.38 | 0.513155 | 0.933 |
| ATRN     | 0.38 | 0.491394 | 0.931 |

|           |      |          |       |
|-----------|------|----------|-------|
| BAG5      | 0.38 | 0.491394 | 0.931 |
| BAP1      | 0.38 | 0.491394 | 0.931 |
| C11orf45  | 0.38 | 0.491394 | 0.931 |
| C18orf63  | 0.38 | 0.491394 | 0.931 |
| C1QL3     | 0.38 | 0.491394 | 0.931 |
| C7orf57   | 0.38 | 0.491394 | 0.931 |
| CARHSP1   | 0.38 | 0.491394 | 0.931 |
| CENPBD1   | 0.38 | 0.491393 | 0.931 |
| CEP76     | 0.38 | 0.491394 | 0.931 |
| CHKB      | 0.38 | 0.491394 | 0.931 |
| CHL1      | 0.38 | 0.491393 | 0.931 |
| CIB2      | 0.38 | 0.513155 | 0.933 |
| CLDN9     | 0.38 | 0.491394 | 0.931 |
| CLEC12A   | 0.38 | 0.491393 | 0.931 |
| CNTROB    | 0.38 | 0.513155 | 0.933 |
| CRIP1     | 0.38 | 0.491393 | 0.931 |
| CRIP2     | 0.38 | 0.491394 | 0.931 |
| CTNS      | 0.38 | 0.513155 | 0.933 |
| CUZD1     | 0.38 | 0.491394 | 0.931 |
| DCAF11    | 0.38 | 0.513154 | 0.933 |
| DIRC2     | 0.38 | 0.491394 | 0.931 |
| DNAJC10   | 0.38 | 0.491394 | 0.931 |
| DOCK3     | 0.38 | 0.491394 | 0.931 |
| EFTUD2    | 0.38 | 0.536857 | 0.939 |
| FAM168A   | 0.38 | 0.491394 | 0.931 |
| FAM192A   | 0.38 | 0.491394 | 0.931 |
| FER1L6    | 0.38 | 0.491394 | 0.931 |
| GABARAPL2 | 0.38 | 0.491394 | 0.931 |
| GDPD1     | 0.38 | 0.491394 | 0.931 |
| GPR3      | 0.38 | 0.491393 | 0.931 |
| GXYLT1    | 0.38 | 0.491393 | 0.931 |
| HDAC10    | 0.38 | 0.491393 | 0.931 |
| HEPN1     | 0.38 | 0.491394 | 0.931 |
| ISOC1     | 0.38 | 0.491394 | 0.931 |
| ITPA      | 0.38 | 0.491394 | 0.931 |
| KIAA1199  | 0.38 | 0.491394 | 0.931 |
| KIR2DL3   | 0.38 | 0.491393 | 0.931 |
| KLK5      | 0.38 | 0.491394 | 0.931 |
| KRT31     | 0.38 | 0.491394 | 0.931 |
| LACE1     | 0.38 | 0.491394 | 0.931 |
| LPA       | 0.38 | 0.491394 | 0.931 |
| MARK4     | 0.38 | 0.491393 | 0.931 |
| MBNL2     | 0.38 | 0.491394 | 0.931 |
| MDH1      | 0.38 | 0.491394 | 0.931 |
| MED26     | 0.38 | 0.491394 | 0.931 |
| MFAP1     | 0.38 | 0.513155 | 0.933 |
| MRPL45    | 0.38 | 0.491394 | 0.931 |

|          |      |          |       |
|----------|------|----------|-------|
| MS4A10   | 0.38 | 0.491394 | 0.931 |
| MTRNR2L1 | 0.38 | 0.562257 | 0.943 |
| NDUFAB1  | 0.38 | 0.513155 | 0.933 |
| NLGN2    | 0.38 | 0.491394 | 0.931 |
| NOSIP    | 0.38 | 0.513155 | 0.933 |
| NOXO1    | 0.38 | 0.491393 | 0.931 |
| NTN4     | 0.38 | 0.491394 | 0.931 |
| NUCKS1   | 0.38 | 0.513155 | 0.933 |
| NUP155   | 0.38 | 0.536857 | 0.939 |
| ODC1     | 0.38 | 0.491394 | 0.931 |
| OR1A2    | 0.38 | 0.491394 | 0.931 |
| PCDP1    | 0.38 | 0.513155 | 0.933 |
| POU4F1   | 0.38 | 0.491394 | 0.931 |
| PPFIA3   | 0.38 | 0.536856 | 0.939 |
| PPRC1    | 0.38 | 0.491394 | 0.931 |
| PROM2    | 0.38 | 0.491394 | 0.931 |
| RAB3D    | 0.38 | 0.491394 | 0.931 |
| RWDD4    | 0.38 | 0.491394 | 0.931 |
| SETD1B   | 0.38 | 0.513155 | 0.933 |
| SETD9    | 0.38 | 0.491394 | 0.931 |
| SH3PXD2B | 0.38 | 0.491394 | 0.931 |
| SLAMF1   | 0.38 | 0.536856 | 0.939 |
| SLC16A6  | 0.38 | 0.491394 | 0.931 |
| SMLR1    | 0.38 | 0.491393 | 0.931 |
| SNAPC2   | 0.38 | 0.513155 | 0.933 |
| SNURF    | 0.38 | 0.491394 | 0.931 |
| SNX2     | 0.38 | 0.491394 | 0.931 |
| SPINT4   | 0.38 | 0.491393 | 0.931 |
| ST8SIA4  | 0.38 | 0.491394 | 0.931 |
| TARBP1   | 0.38 | 0.513155 | 0.933 |
| TAS2R38  | 0.38 | 0.491394 | 0.931 |
| TMEM217  | 0.38 | 0.491394 | 0.931 |
| TMEM254  | 0.38 | 0.491393 | 0.931 |
| TMEM27   | 0.38 | 0.491394 | 0.931 |
| TRIB1    | 0.38 | 0.491394 | 0.931 |
| TUSC5    | 0.38 | 0.491394 | 0.931 |
| U2AF2    | 0.38 | 0.536857 | 0.939 |
| UGT2A3   | 0.38 | 0.491394 | 0.931 |
| UGT2B17  | 0.38 | 0.491393 | 0.931 |
| WDR74    | 0.38 | 0.491394 | 0.931 |
| ZNF12    | 0.38 | 0.491394 | 0.931 |
| ZNF638   | 0.38 | 0.491394 | 0.931 |
| ZNF77    | 0.38 | 0.491393 | 0.931 |
| ABCG4    | 0.39 | 0.480374 | 0.928 |
| ACVR2B   | 0.39 | 0.52654  | 0.939 |
| ADAMTSL3 | 0.39 | 0.480374 | 0.928 |
| ADM      | 0.39 | 0.5024   | 0.932 |

|          |      |          |       |
|----------|------|----------|-------|
| ALOX15B  | 0.39 | 0.480374 | 0.928 |
| AMDHD2   | 0.39 | 0.5024   | 0.932 |
| ANKHD1   | 0.39 | 0.480374 | 0.928 |
| ARL6IP1  | 0.39 | 0.480374 | 0.928 |
| ART1     | 0.39 | 0.480374 | 0.928 |
| AVEN     | 0.39 | 0.480374 | 0.928 |
| AZU1     | 0.39 | 0.5024   | 0.932 |
| C11orf83 | 0.39 | 0.480374 | 0.928 |
| C17orf62 | 0.39 | 0.480374 | 0.928 |
| C2orf81  | 0.39 | 0.480374 | 0.928 |
| C4orf36  | 0.39 | 0.480374 | 0.928 |
| C9orf47  | 0.39 | 0.480374 | 0.928 |
| CCDC94   | 0.39 | 0.580774 | 0.943 |
| CD2AP    | 0.39 | 0.480374 | 0.928 |
| CDH23    | 0.39 | 0.480374 | 0.928 |
| CEP290   | 0.39 | 0.480374 | 0.928 |
| CLEC2A   | 0.39 | 0.480374 | 0.928 |
| COL6A5   | 0.39 | 0.480374 | 0.928 |
| COPRS    | 0.39 | 0.480374 | 0.928 |
| COX20    | 0.39 | 0.480374 | 0.928 |
| DDI1     | 0.39 | 0.480374 | 0.928 |
| DNALI1   | 0.39 | 0.480374 | 0.928 |
| DYDC2    | 0.39 | 0.480374 | 0.928 |
| EREG     | 0.39 | 0.480374 | 0.928 |
| FGD5     | 0.39 | 0.5024   | 0.932 |
| FMN1     | 0.39 | 0.5024   | 0.932 |
| GALNT1   | 0.39 | 0.480374 | 0.928 |
| GPR183   | 0.39 | 0.480374 | 0.928 |
| GSS      | 0.39 | 0.480374 | 0.928 |
| IL4      | 0.39 | 0.480374 | 0.928 |
| INPP5F   | 0.39 | 0.480374 | 0.928 |
| ITGB8    | 0.39 | 0.480374 | 0.928 |
| KCNN1    | 0.39 | 0.52654  | 0.939 |
| KCTD17   | 0.39 | 0.480374 | 0.928 |
| KDM5B    | 0.39 | 0.480374 | 0.928 |
| KPNB1    | 0.39 | 0.5024   | 0.932 |
| KRBA2    | 0.39 | 0.480374 | 0.928 |
| KRT38    | 0.39 | 0.480374 | 0.928 |
| KRT7     | 0.39 | 0.480374 | 0.928 |
| KRTAP2-4 | 0.39 | 0.480374 | 0.928 |
| LAMA3    | 0.39 | 0.480374 | 0.928 |
| LRIT3    | 0.39 | 0.480374 | 0.928 |
| LSM14B   | 0.39 | 0.480374 | 0.928 |
| LTC4S    | 0.39 | 0.480374 | 0.928 |
| METTL15  | 0.39 | 0.480374 | 0.928 |
| MIEF1    | 0.39 | 0.480374 | 0.928 |
| NCOA1    | 0.39 | 0.480374 | 0.928 |

|          |      |          |       |
|----------|------|----------|-------|
| NR1I2    | 0.39 | 0.480374 | 0.928 |
| NUDT8    | 0.39 | 0.480374 | 0.928 |
| OR11H6   | 0.39 | 0.480374 | 0.928 |
| OR1S2    | 0.39 | 0.480374 | 0.928 |
| OR4K15   | 0.39 | 0.480374 | 0.928 |
| PON2     | 0.39 | 0.480374 | 0.928 |
| PPTC7    | 0.39 | 0.480374 | 0.928 |
| PRAMEF15 | 0.39 | 0.480374 | 0.928 |
| PRDM16   | 0.39 | 0.480374 | 0.928 |
| PREX1    | 0.39 | 0.480374 | 0.928 |
| PSD3     | 0.39 | 0.480374 | 0.928 |
| PTPRU    | 0.39 | 0.480374 | 0.928 |
| PVR      | 0.39 | 0.480374 | 0.928 |
| S1PR4    | 0.39 | 0.480374 | 0.928 |
| SKIV2L2  | 0.39 | 0.552323 | 0.943 |
| SLC25A17 | 0.39 | 0.480374 | 0.928 |
| SLC25A31 | 0.39 | 0.480374 | 0.928 |
| SLC25A38 | 0.39 | 0.480374 | 0.928 |
| SLC26A10 | 0.39 | 0.480374 | 0.928 |
| SLC35E3  | 0.39 | 0.5024   | 0.932 |
| SLC6A5   | 0.39 | 0.480374 | 0.928 |
| SLC7A10  | 0.39 | 0.5024   | 0.932 |
| SMIM10   | 0.39 | 0.480374 | 0.928 |
| SOX30    | 0.39 | 0.480374 | 0.928 |
| SPATA13  | 0.39 | 0.480374 | 0.928 |
| SPR      | 0.39 | 0.480374 | 0.928 |
| SSC5D    | 0.39 | 0.480374 | 0.928 |
| TBCEL    | 0.39 | 0.480374 | 0.928 |
| TMEFF1   | 0.39 | 0.480374 | 0.928 |
| TMEM45B  | 0.39 | 0.480374 | 0.928 |
| TNFRSF19 | 0.39 | 0.480374 | 0.928 |
| TOMM22   | 0.39 | 0.502399 | 0.932 |
| TRIM4    | 0.39 | 0.480374 | 0.928 |
| TRPM8    | 0.39 | 0.5024   | 0.932 |
| TUBB     | 0.39 | 0.480374 | 0.928 |
| TWSG1    | 0.39 | 0.480374 | 0.928 |
| VPS13C   | 0.39 | 0.480374 | 0.928 |
| XKRY     | 0.39 | 0.480374 | 0.928 |
| XKRY2    | 0.39 | 0.480374 | 0.928 |
| ZNF251   | 0.39 | 0.480374 | 0.928 |
| ZNF518A  | 0.39 | 0.480374 | 0.928 |
| ZNF687   | 0.39 | 0.5024   | 0.932 |
| ZNF845   | 0.39 | 0.480374 | 0.928 |
| ACE      | 0.4  | 0.469499 | 0.928 |
| ADAM18   | 0.4  | 0.491799 | 0.931 |
| AHR      | 0.4  | 0.469499 | 0.928 |
| APOB     | 0.4  | 0.469499 | 0.928 |

|           |     |          |       |
|-----------|-----|----------|-------|
| BRAT1     | 0.4 | 0.469499 | 0.928 |
| BRINP1    | 0.4 | 0.469499 | 0.928 |
| C10orf113 | 0.4 | 0.469499 | 0.928 |
| C10orf142 | 0.4 | 0.469499 | 0.928 |
| C15orf32  | 0.4 | 0.469499 | 0.928 |
| C20orf197 | 0.4 | 0.469499 | 0.928 |
| C4orf46   | 0.4 | 0.491799 | 0.931 |
| CACNA2D4  | 0.4 | 0.469499 | 0.928 |
| CCDC169-S | 0.4 | 0.469499 | 0.928 |
| CCL1      | 0.4 | 0.469499 | 0.928 |
| CD96      | 0.4 | 0.469499 | 0.928 |
| CDC5L     | 0.4 | 0.516259 | 0.937 |
| CHRM3     | 0.4 | 0.469499 | 0.928 |
| CLYBL     | 0.4 | 0.469499 | 0.928 |
| CRH       | 0.4 | 0.516259 | 0.937 |
| CRNDE     | 0.4 | 0.639944 | 0.954 |
| CTSH      | 0.4 | 0.469499 | 0.928 |
| DEDD      | 0.4 | 0.469499 | 0.928 |
| DNMT3L    | 0.4 | 0.469499 | 0.928 |
| DPCD      | 0.4 | 0.469499 | 0.928 |
| DYNAP     | 0.4 | 0.469499 | 0.928 |
| EIF4G1    | 0.4 | 0.491799 | 0.931 |
| FGB       | 0.4 | 0.469499 | 0.928 |
| FUOM      | 0.4 | 0.469499 | 0.928 |
| FURIN     | 0.4 | 0.469499 | 0.928 |
| GBP6      | 0.4 | 0.469499 | 0.928 |
| GOLM1     | 0.4 | 0.469499 | 0.928 |
| GPR83     | 0.4 | 0.469499 | 0.928 |
| GTF3C6    | 0.4 | 0.491799 | 0.931 |
| GTSF1L    | 0.4 | 0.469499 | 0.928 |
| HECW1     | 0.4 | 0.469499 | 0.928 |
| ICAM3     | 0.4 | 0.469499 | 0.928 |
| IDH3G     | 0.4 | 0.469499 | 0.928 |
| INSL4     | 0.4 | 0.469499 | 0.928 |
| KCNE3     | 0.4 | 0.469499 | 0.928 |
| LRRC45    | 0.4 | 0.469499 | 0.928 |
| MACROD1   | 0.4 | 0.469499 | 0.928 |
| MAPK4     | 0.4 | 0.469499 | 0.928 |
| MEPE      | 0.4 | 0.469499 | 0.928 |
| MRPL55    | 0.4 | 0.469499 | 0.928 |
| MRPS34    | 0.4 | 0.469499 | 0.928 |
| NAALADL2  | 0.4 | 0.469499 | 0.928 |
| NLRP2     | 0.4 | 0.516259 | 0.937 |
| OR52E6    | 0.4 | 0.469499 | 0.928 |
| OR5M10    | 0.4 | 0.469499 | 0.928 |
| PER2      | 0.4 | 0.469499 | 0.928 |
| PFDN4     | 0.4 | 0.469499 | 0.928 |

|          |      |          |       |
|----------|------|----------|-------|
| PODN     | 0.4  | 0.469499 | 0.928 |
| PROCR    | 0.4  | 0.491799 | 0.931 |
| PSMC5    | 0.4  | 0.57141  | 0.943 |
| RALGDS   | 0.4  | 0.491799 | 0.931 |
| RMDN2    | 0.4  | 0.469499 | 0.928 |
| RNF181   | 0.4  | 0.469499 | 0.928 |
| RNF215   | 0.4  | 0.469499 | 0.928 |
| RORA     | 0.4  | 0.469499 | 0.928 |
| RPS19    | 0.4  | 0.516259 | 0.937 |
| RPS3     | 0.4  | 0.516259 | 0.937 |
| S100A7A  | 0.4  | 0.469499 | 0.928 |
| SERINC4  | 0.4  | 0.469499 | 0.928 |
| SHCBP1L  | 0.4  | 0.469499 | 0.928 |
| SLCO2B1  | 0.4  | 0.469499 | 0.928 |
| SMURF2   | 0.4  | 0.469499 | 0.928 |
| SNTG1    | 0.4  | 0.469499 | 0.928 |
| SYNE1    | 0.4  | 0.469499 | 0.928 |
| TACO1    | 0.4  | 0.469499 | 0.928 |
| TAF8     | 0.4  | 0.469499 | 0.928 |
| TCTEX1D4 | 0.4  | 0.491799 | 0.931 |
| TFR2     | 0.4  | 0.491799 | 0.931 |
| TLN1     | 0.4  | 0.491799 | 0.931 |
| TMEM244  | 0.4  | 0.469499 | 0.928 |
| TRPC4    | 0.4  | 0.469499 | 0.928 |
| TSPAN15  | 0.4  | 0.491799 | 0.931 |
| TUBA4A   | 0.4  | 0.469499 | 0.928 |
| TUBB4B   | 0.4  | 0.469499 | 0.928 |
| VGLL1    | 0.4  | 0.469499 | 0.928 |
| WDR45B   | 0.4  | 0.469499 | 0.928 |
| ZCCHC7   | 0.4  | 0.469499 | 0.928 |
| ZFAND1   | 0.4  | 0.469499 | 0.928 |
| ZMYM5    | 0.4  | 0.469499 | 0.928 |
| ZNF221   | 0.4  | 0.469499 | 0.928 |
| ZNF23    | 0.4  | 0.469499 | 0.928 |
| ZNF34    | 0.4  | 0.491799 | 0.931 |
| ZNF343   | 0.4  | 0.469499 | 0.928 |
| ZNF543   | 0.4  | 0.469499 | 0.928 |
| ZNF766   | 0.4  | 0.469499 | 0.928 |
| ZNF98    | 0.4  | 0.469499 | 0.928 |
| ACKR3    | 0.41 | 0.481333 | 0.928 |
| ACOT11   | 0.41 | 0.481333 | 0.928 |
| ADARB2   | 0.41 | 0.458734 | 0.924 |
| APPL1    | 0.41 | 0.458734 | 0.924 |
| BCAS1    | 0.41 | 0.458734 | 0.924 |
| C11orf35 | 0.41 | 0.481334 | 0.928 |
| C1orf65  | 0.41 | 0.458734 | 0.924 |
| C22orf26 | 0.41 | 0.481334 | 0.928 |

|          |      |          |       |
|----------|------|----------|-------|
| C7orf71  | 0.41 | 0.458734 | 0.924 |
| CCDC104  | 0.41 | 0.458734 | 0.924 |
| CCDC168  | 0.41 | 0.458735 | 0.924 |
| CCDC42   | 0.41 | 0.458734 | 0.924 |
| CCDC8    | 0.41 | 0.458735 | 0.924 |
| CCT6B    | 0.41 | 0.458734 | 0.924 |
| CDCA3    | 0.41 | 0.458734 | 0.924 |
| CGNL1    | 0.41 | 0.481334 | 0.928 |
| CHP2     | 0.41 | 0.458734 | 0.924 |
| CHRM5    | 0.41 | 0.458734 | 0.924 |
| CLIC2    | 0.41 | 0.458734 | 0.924 |
| CNGB3    | 0.41 | 0.458734 | 0.924 |
| CNOT6L   | 0.41 | 0.458735 | 0.924 |
| CSHL1    | 0.41 | 0.458734 | 0.924 |
| CSN2     | 0.41 | 0.458734 | 0.924 |
| CTF1     | 0.41 | 0.481334 | 0.928 |
| DEFA3    | 0.41 | 0.458734 | 0.924 |
| DERL1    | 0.41 | 0.458734 | 0.924 |
| DNAH8    | 0.41 | 0.458734 | 0.924 |
| DSG3     | 0.41 | 0.458734 | 0.924 |
| EBLN1    | 0.41 | 0.458734 | 0.924 |
| EDEM2    | 0.41 | 0.458735 | 0.924 |
| ELTD1    | 0.41 | 0.458734 | 0.924 |
| ENDOU    | 0.41 | 0.458734 | 0.924 |
| EXOSC2   | 0.41 | 0.481334 | 0.928 |
| EZH2     | 0.41 | 0.458734 | 0.924 |
| FABP4    | 0.41 | 0.458734 | 0.924 |
| FAIM     | 0.41 | 0.481334 | 0.928 |
| FAM177A1 | 0.41 | 0.481334 | 0.928 |
| FAU      | 0.41 | 0.532739 | 0.939 |
| FAXDC2   | 0.41 | 0.458734 | 0.924 |
| FCER1A   | 0.41 | 0.458734 | 0.924 |
| FEZF2    | 0.41 | 0.458734 | 0.924 |
| FGD3     | 0.41 | 0.458734 | 0.924 |
| FOLR2    | 0.41 | 0.458734 | 0.924 |
| GBX1     | 0.41 | 0.458735 | 0.924 |
| GJB3     | 0.41 | 0.481334 | 0.928 |
| GPR115   | 0.41 | 0.458734 | 0.924 |
| HACL1    | 0.41 | 0.458734 | 0.924 |
| HIGD1C   | 0.41 | 0.458734 | 0.924 |
| HIST1H4J | 0.41 | 0.458735 | 0.924 |
| HIST1H4K | 0.41 | 0.458734 | 0.924 |
| HMGB3    | 0.41 | 0.458734 | 0.924 |
| HSPB3    | 0.41 | 0.458734 | 0.924 |
| HTATIP2  | 0.41 | 0.458734 | 0.924 |
| ID4      | 0.41 | 0.458734 | 0.924 |
| IL18BP   | 0.41 | 0.481334 | 0.928 |

|          |      |          |       |
|----------|------|----------|-------|
| IMMP2L   | 0.41 | 0.458734 | 0.924 |
| KCTD6    | 0.41 | 0.458735 | 0.924 |
| KIAA0100 | 0.41 | 0.458734 | 0.924 |
| KIAA1524 | 0.41 | 0.458734 | 0.924 |
| KRT39    | 0.41 | 0.458734 | 0.924 |
| LMAN2L   | 0.41 | 0.458734 | 0.924 |
| LPPR2    | 0.41 | 0.458734 | 0.924 |
| LPXN     | 0.41 | 0.458734 | 0.924 |
| MBOAT1   | 0.41 | 0.458734 | 0.924 |
| MEN1     | 0.41 | 0.458734 | 0.924 |
| MTA3     | 0.41 | 0.458735 | 0.924 |
| MTERFD2  | 0.41 | 0.458734 | 0.924 |
| NEURL4   | 0.41 | 0.458735 | 0.924 |
| NPC2     | 0.41 | 0.458735 | 0.924 |
| NUTM2A   | 0.41 | 0.481333 | 0.928 |
| NXPE4    | 0.41 | 0.458734 | 0.924 |
| OR10K1   | 0.41 | 0.458734 | 0.924 |
| OR2W1    | 0.41 | 0.458734 | 0.924 |
| OR52B4   | 0.41 | 0.458734 | 0.924 |
| OR8G1    | 0.41 | 0.458735 | 0.924 |
| OR8U1    | 0.41 | 0.50615  | 0.933 |
| OTOG     | 0.41 | 0.458735 | 0.924 |
| PADI3    | 0.41 | 0.458734 | 0.924 |
| PAIP1    | 0.41 | 0.458734 | 0.924 |
| PALM     | 0.41 | 0.458734 | 0.924 |
| PLA2G4D  | 0.41 | 0.458734 | 0.924 |
| PLA2G7   | 0.41 | 0.481333 | 0.928 |
| PLEKHH1  | 0.41 | 0.458734 | 0.924 |
| PPID     | 0.41 | 0.458735 | 0.924 |
| PRAMEF19 | 0.41 | 0.481334 | 0.928 |
| PRPF3    | 0.41 | 0.481333 | 0.928 |
| PSMB10   | 0.41 | 0.458735 | 0.924 |
| RAB11B   | 0.41 | 0.458734 | 0.924 |
| RBKS     | 0.41 | 0.458734 | 0.924 |
| RGS8     | 0.41 | 0.458734 | 0.924 |
| RNASE12  | 0.41 | 0.458734 | 0.924 |
| RPTOR    | 0.41 | 0.458734 | 0.924 |
| RSBN1    | 0.41 | 0.458734 | 0.924 |
| SCAMP1   | 0.41 | 0.50615  | 0.933 |
| SEC16B   | 0.41 | 0.458734 | 0.924 |
| SEZ6L    | 0.41 | 0.481334 | 0.928 |
| SLC47A2  | 0.41 | 0.458735 | 0.924 |
| SLC5A3   | 0.41 | 0.458734 | 0.924 |
| SLMO2    | 0.41 | 0.481334 | 0.928 |
| SMARCE1  | 0.41 | 0.481334 | 0.928 |
| SOX2     | 0.41 | 0.458734 | 0.924 |
| SPAG11B  | 0.41 | 0.481333 | 0.928 |

|           |      |          |       |
|-----------|------|----------|-------|
| SPATA12   | 0.41 | 0.458734 | 0.924 |
| SPEM1     | 0.41 | 0.458735 | 0.924 |
| SRSF4     | 0.41 | 0.458734 | 0.924 |
| STXBP5L   | 0.41 | 0.458734 | 0.924 |
| SVEP1     | 0.41 | 0.481334 | 0.928 |
| SYCE1L    | 0.41 | 0.458734 | 0.924 |
| TAP1      | 0.41 | 0.481333 | 0.928 |
| TBC1D3    | 0.41 | 0.458734 | 0.924 |
| TCL1A     | 0.41 | 0.458734 | 0.924 |
| TERF2     | 0.41 | 0.458734 | 0.924 |
| TMC6      | 0.41 | 0.458734 | 0.924 |
| TMEM133   | 0.41 | 0.458734 | 0.924 |
| TMEM213   | 0.41 | 0.481334 | 0.928 |
| TMEM53    | 0.41 | 0.458734 | 0.924 |
| TRIM46    | 0.41 | 0.481333 | 0.928 |
| TTC39B    | 0.41 | 0.458734 | 0.924 |
| UHRF1BP1L | 0.41 | 0.458734 | 0.924 |
| WDFY1     | 0.41 | 0.458735 | 0.924 |
| YTHDC1    | 0.41 | 0.50615  | 0.933 |
| ZNF19     | 0.41 | 0.458735 | 0.924 |
| ZNF443    | 0.41 | 0.458734 | 0.924 |
| ZNF764    | 0.41 | 0.458734 | 0.924 |
| ABHD16A   | 0.42 | 0.448172 | 0.924 |
| ACER3     | 0.42 | 0.471025 | 0.928 |
| ACSL5     | 0.42 | 0.448171 | 0.924 |
| AKAP4     | 0.42 | 0.448171 | 0.924 |
| ALG1L2    | 0.42 | 0.523117 | 0.938 |
| ALMS1     | 0.42 | 0.471025 | 0.928 |
| AQR       | 0.42 | 0.523117 | 0.938 |
| ARL17A    | 0.42 | 0.448171 | 0.924 |
| ATP13A1   | 0.42 | 0.448172 | 0.924 |
| BAMBI     | 0.42 | 0.448171 | 0.924 |
| BRMS1L    | 0.42 | 0.448172 | 0.924 |
| BTK       | 0.42 | 0.448172 | 0.924 |
| C10orf126 | 0.42 | 0.471025 | 0.928 |
| C16orf62  | 0.42 | 0.448171 | 0.924 |
| C1orf162  | 0.42 | 0.448171 | 0.924 |
| C8orf58   | 0.42 | 0.448171 | 0.924 |
| CBWD6     | 0.42 | 0.448171 | 0.924 |
| CCDC160   | 0.42 | 0.448172 | 0.924 |
| CCDC33    | 0.42 | 0.471025 | 0.928 |
| COLGALT1  | 0.42 | 0.448172 | 0.924 |
| CXCL2     | 0.42 | 0.448172 | 0.924 |
| CYB5RL    | 0.42 | 0.448171 | 0.924 |
| CYGB      | 0.42 | 0.471025 | 0.928 |
| DIS3      | 0.42 | 0.448171 | 0.924 |
| ECHDC2    | 0.42 | 0.448171 | 0.924 |

|          |      |          |       |
|----------|------|----------|-------|
| ECSCR    | 0.42 | 0.448172 | 0.924 |
| ESD      | 0.42 | 0.448172 | 0.924 |
| FAM117A  | 0.42 | 0.448171 | 0.924 |
| FAM120C  | 0.42 | 0.448171 | 0.924 |
| FBXO10   | 0.42 | 0.448172 | 0.924 |
| FBXO48   | 0.42 | 0.448172 | 0.924 |
| FGA      | 0.42 | 0.448172 | 0.924 |
| FIBIN    | 0.42 | 0.448172 | 0.924 |
| GLYATL3  | 0.42 | 0.448172 | 0.924 |
| GMNC     | 0.42 | 0.448172 | 0.924 |
| GRPEL1   | 0.42 | 0.496056 | 0.932 |
| HS6ST3   | 0.42 | 0.448172 | 0.924 |
| HSPA5    | 0.42 | 0.55277  | 0.943 |
| IMPDH2   | 0.42 | 0.448172 | 0.924 |
| KCNA5    | 0.42 | 0.448171 | 0.924 |
| KRT71    | 0.42 | 0.448172 | 0.924 |
| KRTAP2-3 | 0.42 | 0.448171 | 0.924 |
| KSR1     | 0.42 | 0.471025 | 0.928 |
| LAMA4    | 0.42 | 0.471025 | 0.928 |
| LRFN4    | 0.42 | 0.448171 | 0.924 |
| MAPK11   | 0.42 | 0.471025 | 0.928 |
| MICU1    | 0.42 | 0.448172 | 0.924 |
| MLF1     | 0.42 | 0.448172 | 0.924 |
| MPZ      | 0.42 | 0.448171 | 0.924 |
| NDUFB4   | 0.42 | 0.448171 | 0.924 |
| NEK8     | 0.42 | 0.448172 | 0.924 |
| NNAT     | 0.42 | 0.448172 | 0.924 |
| NOXRED1  | 0.42 | 0.448172 | 0.924 |
| NSG1     | 0.42 | 0.448171 | 0.924 |
| ODAM     | 0.42 | 0.448171 | 0.924 |
| OR10A5   | 0.42 | 0.471025 | 0.928 |
| OR10G4   | 0.42 | 0.448171 | 0.924 |
| OR2D2    | 0.42 | 0.448172 | 0.924 |
| OR4C12   | 0.42 | 0.448171 | 0.924 |
| OR51M1   | 0.42 | 0.448171 | 0.924 |
| OR52R1   | 0.42 | 0.448172 | 0.924 |
| OR56A5   | 0.42 | 0.448171 | 0.924 |
| OR6C6    | 0.42 | 0.448171 | 0.924 |
| OXCT2    | 0.42 | 0.448171 | 0.924 |
| PARD3    | 0.42 | 0.448171 | 0.924 |
| PBOV1    | 0.42 | 0.448172 | 0.924 |
| PCDHA8   | 0.42 | 0.448171 | 0.924 |
| PGC      | 0.42 | 0.448171 | 0.924 |
| PPP1R17  | 0.42 | 0.448172 | 0.924 |
| RAB40C   | 0.42 | 0.448172 | 0.924 |
| RASSF1   | 0.42 | 0.448172 | 0.924 |
| RIMBP3B  | 0.42 | 0.448172 | 0.924 |

|           |      |          |       |
|-----------|------|----------|-------|
| RNF223    | 0.42 | 0.448172 | 0.924 |
| RPL27     | 0.42 | 0.471025 | 0.928 |
| RRM2B     | 0.42 | 0.448171 | 0.924 |
| SCAF8     | 0.42 | 0.448171 | 0.924 |
| SECISBP2L | 0.42 | 0.448171 | 0.924 |
| SHISA3    | 0.42 | 0.448171 | 0.924 |
| SHMT1     | 0.42 | 0.448171 | 0.924 |
| SHPK      | 0.42 | 0.471025 | 0.928 |
| SSTR3     | 0.42 | 0.496056 | 0.932 |
| TCEB3CL   | 0.42 | 0.448171 | 0.924 |
| TMEM255B  | 0.42 | 0.448171 | 0.924 |
| TMEM52B   | 0.42 | 0.448171 | 0.924 |
| TMEM86A   | 0.42 | 0.448172 | 0.924 |
| TMPPE     | 0.42 | 0.448171 | 0.924 |
| TP53TG5   | 0.42 | 0.448172 | 0.924 |
| TPGS2     | 0.42 | 0.448171 | 0.924 |
| TRIM32    | 0.42 | 0.448172 | 0.924 |
| TRIM51    | 0.42 | 0.448172 | 0.924 |
| TSPAN17   | 0.42 | 0.448171 | 0.924 |
| UTRN      | 0.42 | 0.471025 | 0.928 |
| VDR       | 0.42 | 0.448171 | 0.924 |
| WDR35     | 0.42 | 0.448172 | 0.924 |
| ZCWPW1    | 0.42 | 0.471025 | 0.928 |
| ZMYM6     | 0.42 | 0.448171 | 0.924 |
| ZNF322    | 0.42 | 0.448171 | 0.924 |
| ZNF485    | 0.42 | 0.448172 | 0.924 |
| ZNF683    | 0.42 | 0.471025 | 0.928 |
| ZNF714    | 0.42 | 0.448172 | 0.924 |
| ZNF772    | 0.42 | 0.448171 | 0.924 |
| ZNF777    | 0.42 | 0.448171 | 0.924 |
| A4GALT    | 0.43 | 0.460768 | 0.924 |
| ACSF3     | 0.43 | 0.437707 | 0.924 |
| ADH4      | 0.43 | 0.460768 | 0.924 |
| AGTRAP    | 0.43 | 0.437707 | 0.924 |
| AGXT2     | 0.43 | 0.437707 | 0.924 |
| ANKRD49   | 0.43 | 0.437707 | 0.924 |
| ANO1      | 0.43 | 0.437706 | 0.924 |
| ARHGEF17  | 0.43 | 0.437707 | 0.924 |
| ARPC1A    | 0.43 | 0.437706 | 0.924 |
| ARPC1B    | 0.43 | 0.437706 | 0.924 |
| BYSL      | 0.43 | 0.460768 | 0.924 |
| C11orf21  | 0.43 | 0.437707 | 0.924 |
| C16orf58  | 0.43 | 0.460768 | 0.924 |
| C6orf57   | 0.43 | 0.437706 | 0.924 |
| CENPW     | 0.43 | 0.460768 | 0.924 |
| CNN2      | 0.43 | 0.437707 | 0.924 |
| CYP7A1    | 0.43 | 0.437707 | 0.924 |

|          |      |          |       |
|----------|------|----------|-------|
| DEFA1    | 0.43 | 0.437707 | 0.924 |
| DEFA1B   | 0.43 | 0.437707 | 0.924 |
| DNAH9    | 0.43 | 0.437707 | 0.924 |
| DNASE2B  | 0.43 | 0.437706 | 0.924 |
| DPP7     | 0.43 | 0.460768 | 0.924 |
| ECI2     | 0.43 | 0.437706 | 0.924 |
| EDDM3B   | 0.43 | 0.437706 | 0.924 |
| EIF1AD   | 0.43 | 0.460768 | 0.924 |
| EIF3C    | 0.43 | 0.437707 | 0.924 |
| ERAP1    | 0.43 | 0.437707 | 0.924 |
| FAM214B  | 0.43 | 0.437707 | 0.924 |
| FAT1     | 0.43 | 0.437706 | 0.924 |
| FOLH1B   | 0.43 | 0.437706 | 0.924 |
| FOSB     | 0.43 | 0.437706 | 0.924 |
| FYTTD1   | 0.43 | 0.437707 | 0.924 |
| GAREML   | 0.43 | 0.437706 | 0.924 |
| GAST     | 0.43 | 0.437707 | 0.924 |
| GDPD4    | 0.43 | 0.437707 | 0.924 |
| GLG1     | 0.43 | 0.460768 | 0.924 |
| GRIA3    | 0.43 | 0.460768 | 0.924 |
| HAUS4    | 0.43 | 0.437706 | 0.924 |
| HPS6     | 0.43 | 0.437706 | 0.924 |
| HS2ST1   | 0.43 | 0.437707 | 0.924 |
| IBSP     | 0.43 | 0.437707 | 0.924 |
| IKBKE    | 0.43 | 0.437707 | 0.924 |
| IPO8     | 0.43 | 0.437707 | 0.924 |
| ITGA11   | 0.43 | 0.460768 | 0.924 |
| ITLN1    | 0.43 | 0.437707 | 0.924 |
| KDELR2   | 0.43 | 0.437707 | 0.924 |
| KIAA1586 | 0.43 | 0.460768 | 0.924 |
| KIT      | 0.43 | 0.437706 | 0.924 |
| KRTAP5-8 | 0.43 | 0.437706 | 0.924 |
| KXD1     | 0.43 | 0.437706 | 0.924 |
| LIPT2    | 0.43 | 0.437707 | 0.924 |
| MAGEA12  | 0.43 | 0.437707 | 0.924 |
| MEGF11   | 0.43 | 0.437707 | 0.924 |
| MLLT1    | 0.43 | 0.437707 | 0.924 |
| MRPL19   | 0.43 | 0.460768 | 0.924 |
| NMUR2    | 0.43 | 0.437707 | 0.924 |
| NOP10    | 0.43 | 0.437706 | 0.924 |
| NPAS3    | 0.43 | 0.437707 | 0.924 |
| NR0B2    | 0.43 | 0.437707 | 0.924 |
| NUDT19   | 0.43 | 0.437706 | 0.924 |
| ODF1     | 0.43 | 0.460768 | 0.924 |
| OR7D2    | 0.43 | 0.437707 | 0.924 |
| PARP10   | 0.43 | 0.437707 | 0.924 |
| PEA15    | 0.43 | 0.437707 | 0.924 |

|            |      |          |       |
|------------|------|----------|-------|
| PHF21B     | 0.43 | 0.437707 | 0.924 |
| POLA1      | 0.43 | 0.513575 | 0.933 |
| PPARG      | 0.43 | 0.460768 | 0.924 |
| PPM1M      | 0.43 | 0.437707 | 0.924 |
| PRR21      | 0.43 | 0.437707 | 0.924 |
| QPCT       | 0.43 | 0.437707 | 0.924 |
| QSOX1      | 0.43 | 0.437707 | 0.924 |
| RAB40B     | 0.43 | 0.437707 | 0.924 |
| RBM23      | 0.43 | 0.437707 | 0.924 |
| RDH10      | 0.43 | 0.437706 | 0.924 |
| REPIN1     | 0.43 | 0.437706 | 0.924 |
| RPL3L      | 0.43 | 0.437707 | 0.924 |
| RRP1B      | 0.43 | 0.437706 | 0.924 |
| RSRC2      | 0.43 | 0.486157 | 0.931 |
| SLAMF6     | 0.43 | 0.437706 | 0.924 |
| SLFN13     | 0.43 | 0.437707 | 0.924 |
| SMARCA4    | 0.43 | 0.460768 | 0.924 |
| SNRNP200   | 0.43 | 0.513575 | 0.933 |
| SPIRE2     | 0.43 | 0.437706 | 0.924 |
| ST5        | 0.43 | 0.437707 | 0.924 |
| STRN       | 0.43 | 0.460768 | 0.924 |
| TCP11L2    | 0.43 | 0.437707 | 0.924 |
| TMEM119    | 0.43 | 0.460768 | 0.924 |
| TMEM126B   | 0.43 | 0.460768 | 0.924 |
| TMEM14A    | 0.43 | 0.437706 | 0.924 |
| TOMM6      | 0.43 | 0.437706 | 0.924 |
| TRIM13     | 0.43 | 0.437707 | 0.924 |
| U2AF1L4    | 0.43 | 0.437706 | 0.924 |
| UBTF       | 0.43 | 0.460768 | 0.924 |
| ZBTB10     | 0.43 | 0.437707 | 0.924 |
| ZDHHC20    | 0.43 | 0.437707 | 0.924 |
| ZNF365     | 0.43 | 0.437706 | 0.924 |
| ZNF385A    | 0.43 | 0.437706 | 0.924 |
| ZNF555     | 0.43 | 0.437706 | 0.924 |
| ZNF589     | 0.43 | 0.437707 | 0.924 |
| ZNF829     | 0.43 | 0.437706 | 0.924 |
| AK5        | 0.44 | 0.427497 | 0.923 |
| ALKBH8     | 0.44 | 0.427497 | 0.923 |
| ANGPT1     | 0.44 | 0.45069  | 0.924 |
| APLP2      | 0.44 | 0.427498 | 0.923 |
| ARFIP2     | 0.44 | 0.45069  | 0.924 |
| ARHGAP32   | 0.44 | 0.427498 | 0.923 |
| ARL2       | 0.44 | 0.476372 | 0.928 |
| ARPC4-TTLI | 0.44 | 0.427498 | 0.923 |
| C19orf26   | 0.44 | 0.427498 | 0.923 |
| C3orf30    | 0.44 | 0.427497 | 0.923 |
| C5orf15    | 0.44 | 0.427497 | 0.923 |

|           |      |          |       |
|-----------|------|----------|-------|
| CCR2      | 0.44 | 0.427498 | 0.923 |
| CDC45     | 0.44 | 0.534517 | 0.939 |
| CEP85     | 0.44 | 0.427498 | 0.923 |
| CLCC1     | 0.44 | 0.427498 | 0.923 |
| CLPP      | 0.44 | 0.427498 | 0.923 |
| CNOT11    | 0.44 | 0.504075 | 0.933 |
| COPB2     | 0.44 | 0.504076 | 0.933 |
| CPZ       | 0.44 | 0.427498 | 0.923 |
| CREB3L2   | 0.44 | 0.427498 | 0.923 |
| CRYGC     | 0.44 | 0.427498 | 0.923 |
| DMRTB1    | 0.44 | 0.427497 | 0.923 |
| DUOXA2    | 0.44 | 0.427498 | 0.923 |
| EPOR      | 0.44 | 0.427498 | 0.923 |
| ERN1      | 0.44 | 0.427498 | 0.923 |
| FOSL2     | 0.44 | 0.427498 | 0.923 |
| FOXH1     | 0.44 | 0.427498 | 0.923 |
| FUT2      | 0.44 | 0.427498 | 0.923 |
| H6PD      | 0.44 | 0.427498 | 0.923 |
| HBZ       | 0.44 | 0.427498 | 0.923 |
| HHEX      | 0.44 | 0.427498 | 0.923 |
| HN1L      | 0.44 | 0.427498 | 0.923 |
| HNRNPCL2  | 0.44 | 0.504075 | 0.933 |
| HNRNPUL1  | 0.44 | 0.427497 | 0.923 |
| INMT      | 0.44 | 0.427498 | 0.923 |
| IYD       | 0.44 | 0.427497 | 0.923 |
| KANSL3    | 0.44 | 0.427498 | 0.923 |
| KIAA1671  | 0.44 | 0.45069  | 0.924 |
| KRT80     | 0.44 | 0.45069  | 0.924 |
| KRTAP13-4 | 0.44 | 0.427498 | 0.923 |
| LCE1E     | 0.44 | 0.427498 | 0.923 |
| LRRN4     | 0.44 | 0.427498 | 0.923 |
| LY6K      | 0.44 | 0.427498 | 0.923 |
| MAN2B1    | 0.44 | 0.427498 | 0.923 |
| MRPL13    | 0.44 | 0.427498 | 0.923 |
| NCOA5     | 0.44 | 0.45069  | 0.924 |
| NFIC      | 0.44 | 0.427498 | 0.923 |
| NIM1      | 0.44 | 0.427498 | 0.923 |
| NMU       | 0.44 | 0.427498 | 0.923 |
| NT5DC1    | 0.44 | 0.427498 | 0.923 |
| OR2M7     | 0.44 | 0.427498 | 0.923 |
| OR5A1     | 0.44 | 0.427497 | 0.923 |
| OR5H15    | 0.44 | 0.427498 | 0.923 |
| PAIP2B    | 0.44 | 0.427498 | 0.923 |
| PANX1     | 0.44 | 0.427498 | 0.923 |
| PDE4DIP   | 0.44 | 0.427497 | 0.923 |
| PLA2G4A   | 0.44 | 0.427498 | 0.923 |
| PLP1      | 0.44 | 0.427497 | 0.923 |

|          |      |          |       |
|----------|------|----------|-------|
| PPHLN1   | 0.44 | 0.427498 | 0.923 |
| PRSS27   | 0.44 | 0.427497 | 0.923 |
| PSMD8    | 0.44 | 0.427497 | 0.923 |
| PTGFRN   | 0.44 | 0.45069  | 0.924 |
| RAB19    | 0.44 | 0.45069  | 0.924 |
| RAPGEF4  | 0.44 | 0.427498 | 0.923 |
| RGPD2    | 0.44 | 0.427498 | 0.923 |
| RXFP1    | 0.44 | 0.427498 | 0.923 |
| SCLY     | 0.44 | 0.45069  | 0.924 |
| SLC12A8  | 0.44 | 0.45069  | 0.924 |
| SLC2A6   | 0.44 | 0.427498 | 0.923 |
| SLC39A14 | 0.44 | 0.427498 | 0.923 |
| SLC5A2   | 0.44 | 0.427498 | 0.923 |
| SLFN12   | 0.44 | 0.427498 | 0.923 |
| SUSD1    | 0.44 | 0.427498 | 0.923 |
| TCEAL5   | 0.44 | 0.427498 | 0.923 |
| TGM1     | 0.44 | 0.427497 | 0.923 |
| THEMIS2  | 0.44 | 0.427498 | 0.923 |
| TLR8     | 0.44 | 0.427498 | 0.923 |
| TMEM232  | 0.44 | 0.45069  | 0.924 |
| TMEM234  | 0.44 | 0.427497 | 0.923 |
| TMEM8C   | 0.44 | 0.427498 | 0.923 |
| TRIM17   | 0.44 | 0.45069  | 0.924 |
| VPS72    | 0.44 | 0.45069  | 0.924 |
| WDR24    | 0.44 | 0.427498 | 0.923 |
| ZCCHC13  | 0.44 | 0.45069  | 0.924 |
| ZFAND2B  | 0.44 | 0.45069  | 0.924 |
| ZMAT5    | 0.44 | 0.45069  | 0.924 |
| ZNF354B  | 0.44 | 0.427498 | 0.923 |
| ZNF585A  | 0.44 | 0.427497 | 0.923 |
| ZNF704   | 0.44 | 0.427498 | 0.923 |
| ABLIM1   | 0.45 | 0.417344 | 0.919 |
| ANO5     | 0.45 | 0.417344 | 0.919 |
| ARV1     | 0.45 | 0.440798 | 0.924 |
| ASPDH    | 0.45 | 0.440799 | 0.924 |
| ATP5L    | 0.45 | 0.440799 | 0.924 |
| BCL2A1   | 0.45 | 0.417345 | 0.919 |
| C12orf50 | 0.45 | 0.417344 | 0.919 |
| C1orf158 | 0.45 | 0.417345 | 0.919 |
| C1orf35  | 0.45 | 0.440799 | 0.924 |
| C9orf72  | 0.45 | 0.417344 | 0.919 |
| CAPRIN2  | 0.45 | 0.417344 | 0.919 |
| CCNB1IP1 | 0.45 | 0.417344 | 0.919 |
| CCT3     | 0.45 | 0.440799 | 0.924 |
| CCZ1B    | 0.45 | 0.417344 | 0.919 |
| CD48     | 0.45 | 0.417344 | 0.919 |
| CEACAM4  | 0.45 | 0.417344 | 0.919 |

|          |      |          |       |
|----------|------|----------|-------|
| CLIP3    | 0.45 | 0.417344 | 0.919 |
| CMTM7    | 0.45 | 0.417344 | 0.919 |
| CSNK1G3  | 0.45 | 0.417344 | 0.919 |
| CTAG1A   | 0.45 | 0.417344 | 0.919 |
| CTAG1B   | 0.45 | 0.417344 | 0.919 |
| DCP1B    | 0.45 | 0.417344 | 0.919 |
| DHX38    | 0.45 | 0.440798 | 0.924 |
| DIP2C    | 0.45 | 0.417344 | 0.919 |
| DNAH14   | 0.45 | 0.417344 | 0.919 |
| DNMT3A   | 0.45 | 0.417344 | 0.919 |
| EHBP1L1  | 0.45 | 0.417344 | 0.919 |
| EIF4A2   | 0.45 | 0.417344 | 0.919 |
| ERICH2   | 0.45 | 0.417344 | 0.919 |
| EVI2B    | 0.45 | 0.417344 | 0.919 |
| FBXO38   | 0.45 | 0.417344 | 0.919 |
| FOXO6    | 0.45 | 0.466626 | 0.928 |
| FTHL17   | 0.45 | 0.417344 | 0.919 |
| GAB2     | 0.45 | 0.417344 | 0.919 |
| GAPT     | 0.45 | 0.417344 | 0.919 |
| GNAS     | 0.45 | 0.417344 | 0.919 |
| GOT1     | 0.45 | 0.417344 | 0.919 |
| GSTK1    | 0.45 | 0.417345 | 0.919 |
| GSTT1    | 0.45 | 0.417344 | 0.919 |
| IFNA13   | 0.45 | 0.417344 | 0.919 |
| KCNA2    | 0.45 | 0.417344 | 0.919 |
| KLK3     | 0.45 | 0.417344 | 0.919 |
| KLRC3    | 0.45 | 0.417344 | 0.919 |
| LSS      | 0.45 | 0.417344 | 0.919 |
| MAN2B2   | 0.45 | 0.417344 | 0.919 |
| MANF     | 0.45 | 0.417344 | 0.919 |
| MAPKAPK2 | 0.45 | 0.417345 | 0.919 |
| MCCC1    | 0.45 | 0.417344 | 0.919 |
| MGAT4A   | 0.45 | 0.417344 | 0.919 |
| MYL1     | 0.45 | 0.417344 | 0.919 |
| NDST4    | 0.45 | 0.417344 | 0.919 |
| NHSL2    | 0.45 | 0.417345 | 0.919 |
| NPAS1    | 0.45 | 0.417344 | 0.919 |
| PARD3B   | 0.45 | 0.417344 | 0.919 |
| PEMT     | 0.45 | 0.417344 | 0.919 |
| PHF20L1  | 0.45 | 0.417344 | 0.919 |
| PLGLB1   | 0.45 | 0.417344 | 0.919 |
| PLGLB2   | 0.45 | 0.417344 | 0.919 |
| POLR3F   | 0.45 | 0.417345 | 0.919 |
| POTEM    | 0.45 | 0.417344 | 0.919 |
| RAB31    | 0.45 | 0.417344 | 0.919 |
| RBL2     | 0.45 | 0.440798 | 0.924 |
| RCAN3    | 0.45 | 0.440798 | 0.924 |

|          |      |          |       |
|----------|------|----------|-------|
| RCE1     | 0.45 | 0.417344 | 0.919 |
| RGMA     | 0.45 | 0.417344 | 0.919 |
| RPS18    | 0.45 | 0.417344 | 0.919 |
| SCARB2   | 0.45 | 0.440798 | 0.924 |
| SDHAF1   | 0.45 | 0.417344 | 0.919 |
| SEMA3D   | 0.45 | 0.417344 | 0.919 |
| SKIV2L   | 0.45 | 0.466626 | 0.928 |
| SLC25A13 | 0.45 | 0.417344 | 0.919 |
| SLC27A2  | 0.45 | 0.417345 | 0.919 |
| SLC34A2  | 0.45 | 0.417344 | 0.919 |
| SPDYA    | 0.45 | 0.417344 | 0.919 |
| SPDYE4   | 0.45 | 0.417344 | 0.919 |
| SPRY3    | 0.45 | 0.417345 | 0.919 |
| SUV39H2  | 0.45 | 0.417344 | 0.919 |
| TAS2R41  | 0.45 | 0.440798 | 0.924 |
| TBC1D30  | 0.45 | 0.417344 | 0.919 |
| TBC1D3B  | 0.45 | 0.417344 | 0.919 |
| TIGIT    | 0.45 | 0.417344 | 0.919 |
| TNFRSF1A | 0.45 | 0.417345 | 0.919 |
| TPD52L3  | 0.45 | 0.417344 | 0.919 |
| TRPV1    | 0.45 | 0.440798 | 0.924 |
| TUBG2    | 0.45 | 0.417344 | 0.919 |
| TYMP     | 0.45 | 0.417344 | 0.919 |
| UNC45A   | 0.45 | 0.440798 | 0.924 |
| VAMP5    | 0.45 | 0.417344 | 0.919 |
| ZNF107   | 0.45 | 0.417344 | 0.919 |
| ZNF3     | 0.45 | 0.417344 | 0.919 |
| ZNF37A   | 0.45 | 0.417344 | 0.919 |
| ZNF563   | 0.45 | 0.417345 | 0.919 |
| ZNF575   | 0.45 | 0.440798 | 0.924 |
| ABCC6    | 0.46 | 0.407438 | 0.917 |
| ACP2     | 0.46 | 0.407438 | 0.917 |
| AMIGO1   | 0.46 | 0.430927 | 0.924 |
| ANKLE1   | 0.46 | 0.407438 | 0.917 |
| ARIH2OS  | 0.46 | 0.407438 | 0.917 |
| BIRC8    | 0.46 | 0.407438 | 0.917 |
| C11orf63 | 0.46 | 0.407438 | 0.917 |
| C3orf14  | 0.46 | 0.407438 | 0.917 |
| CAGE1    | 0.46 | 0.407438 | 0.917 |
| CARD14   | 0.46 | 0.407438 | 0.917 |
| CBLN1    | 0.46 | 0.430927 | 0.924 |
| CCZ1     | 0.46 | 0.407438 | 0.917 |
| CD52     | 0.46 | 0.430927 | 0.924 |
| COL19A1  | 0.46 | 0.430926 | 0.924 |
| CTCFL    | 0.46 | 0.407438 | 0.917 |
| EIF1AY   | 0.46 | 0.407438 | 0.917 |
| EIF2AK1  | 0.46 | 0.430927 | 0.924 |

|         |      |          |       |
|---------|------|----------|-------|
| EIF2B4  | 0.46 | 0.430927 | 0.924 |
| ERO1L   | 0.46 | 0.407438 | 0.917 |
| F3      | 0.46 | 0.407438 | 0.917 |
| FAM9B   | 0.46 | 0.456996 | 0.924 |
| FAT3    | 0.46 | 0.407438 | 0.917 |
| FSD1L   | 0.46 | 0.407438 | 0.917 |
| FTSJ3   | 0.46 | 0.407438 | 0.917 |
| FZD10   | 0.46 | 0.407438 | 0.917 |
| GC      | 0.46 | 0.430927 | 0.924 |
| GPR182  | 0.46 | 0.407438 | 0.917 |
| GTF2E1  | 0.46 | 0.407438 | 0.917 |
| HDGFRP2 | 0.46 | 0.430927 | 0.924 |
| IL12RB1 | 0.46 | 0.407438 | 0.917 |
| KCNK4   | 0.46 | 0.407438 | 0.917 |
| KLHDC8B | 0.46 | 0.407438 | 0.917 |
| KMT2C   | 0.46 | 0.430926 | 0.924 |
| LRRC43  | 0.46 | 0.430927 | 0.924 |
| MAST4   | 0.46 | 0.430927 | 0.924 |
| MEIOB   | 0.46 | 0.407438 | 0.917 |
| MOB3A   | 0.46 | 0.407438 | 0.917 |
| MPPED2  | 0.46 | 0.407438 | 0.917 |
| NDST3   | 0.46 | 0.407438 | 0.917 |
| NFIX    | 0.46 | 0.407438 | 0.917 |
| NKX3-1  | 0.46 | 0.456996 | 0.924 |
| NT5C3B  | 0.46 | 0.407438 | 0.917 |
| OR1Q1   | 0.46 | 0.485507 | 0.931 |
| OR2G2   | 0.46 | 0.407438 | 0.917 |
| OR6A2   | 0.46 | 0.407438 | 0.917 |
| ORC1    | 0.46 | 0.430927 | 0.924 |
| PAX4    | 0.46 | 0.407438 | 0.917 |
| PDLIM1  | 0.46 | 0.407438 | 0.917 |
| PIP5KL1 | 0.46 | 0.407438 | 0.917 |
| PLXNA1  | 0.46 | 0.407438 | 0.917 |
| PLXNC1  | 0.46 | 0.407438 | 0.917 |
| PRR16   | 0.46 | 0.430927 | 0.924 |
| PRUNE   | 0.46 | 0.407438 | 0.917 |
| PRUNE2  | 0.46 | 0.407438 | 0.917 |
| PUS10   | 0.46 | 0.430927 | 0.924 |
| RGPD3   | 0.46 | 0.407438 | 0.917 |
| RRAS    | 0.46 | 0.407438 | 0.917 |
| RSL24D1 | 0.46 | 0.407438 | 0.917 |
| RTN4RL2 | 0.46 | 0.407438 | 0.917 |
| S100A4  | 0.46 | 0.407438 | 0.917 |
| SCN3B   | 0.46 | 0.430927 | 0.924 |
| SHH     | 0.46 | 0.407438 | 0.917 |
| SKI     | 0.46 | 0.407438 | 0.917 |
| SLC18A3 | 0.46 | 0.407438 | 0.917 |

|          |      |          |       |
|----------|------|----------|-------|
| TAS2R30  | 0.46 | 0.407438 | 0.917 |
| TBC1D3F  | 0.46 | 0.407438 | 0.917 |
| TDO2     | 0.46 | 0.407438 | 0.917 |
| TIMM23   | 0.46 | 0.407438 | 0.917 |
| TLDC1    | 0.46 | 0.407438 | 0.917 |
| TLN2     | 0.46 | 0.430927 | 0.924 |
| TMEM258  | 0.46 | 0.407438 | 0.917 |
| TMPRSS4  | 0.46 | 0.407438 | 0.917 |
| TTLL3    | 0.46 | 0.407438 | 0.917 |
| TTR      | 0.46 | 0.407438 | 0.917 |
| TXNDC17  | 0.46 | 0.407438 | 0.917 |
| WNT7B    | 0.46 | 0.407438 | 0.917 |
| ZNF185   | 0.46 | 0.430926 | 0.924 |
| ZNF25    | 0.46 | 0.407438 | 0.917 |
| ZNF280C  | 0.46 | 0.407438 | 0.917 |
| ZNF511   | 0.46 | 0.430927 | 0.924 |
| ZNF558   | 0.46 | 0.430926 | 0.924 |
| ANKRD18B | 0.47 | 0.397585 | 0.911 |
| APBA1    | 0.47 | 0.397585 | 0.911 |
| ARL13A   | 0.47 | 0.397585 | 0.911 |
| BTBD3    | 0.47 | 0.397585 | 0.911 |
| BUD31    | 0.47 | 0.507907 | 0.933 |
| CACNA1S  | 0.47 | 0.397585 | 0.911 |
| CALML5   | 0.47 | 0.397585 | 0.911 |
| CASKIN2  | 0.47 | 0.397585 | 0.911 |
| CCDC110  | 0.47 | 0.397585 | 0.911 |
| CCDC158  | 0.47 | 0.397585 | 0.911 |
| CCDC172  | 0.47 | 0.42121  | 0.923 |
| CCL28    | 0.47 | 0.397586 | 0.911 |
| CHD1L    | 0.47 | 0.397585 | 0.911 |
| CNFN     | 0.47 | 0.397585 | 0.911 |
| CNTNAP3B | 0.47 | 0.397586 | 0.911 |
| COMMD4   | 0.47 | 0.397585 | 0.911 |
| CPNE8    | 0.47 | 0.397585 | 0.911 |
| CX3CR1   | 0.47 | 0.397586 | 0.911 |
| CYS1     | 0.47 | 0.397585 | 0.911 |
| DDX50    | 0.47 | 0.447511 | 0.924 |
| DIEXF    | 0.47 | 0.421211 | 0.923 |
| DLK1     | 0.47 | 0.397586 | 0.911 |
| DOHH     | 0.47 | 0.421211 | 0.923 |
| DYRK4    | 0.47 | 0.397585 | 0.911 |
| EIF5A2   | 0.47 | 0.397586 | 0.911 |
| FAM229A  | 0.47 | 0.397585 | 0.911 |
| FBXO25   | 0.47 | 0.397585 | 0.911 |
| FIGNL2   | 0.47 | 0.397586 | 0.911 |
| FOSL1    | 0.47 | 0.397586 | 0.911 |
| GATSL2   | 0.47 | 0.397585 | 0.911 |

|           |      |          |       |
|-----------|------|----------|-------|
| GDAP1L1   | 0.47 | 0.397586 | 0.911 |
| GNLY      | 0.47 | 0.397585 | 0.911 |
| GRAMD1C   | 0.47 | 0.397585 | 0.911 |
| GRIN2D    | 0.47 | 0.397585 | 0.911 |
| GSG2      | 0.47 | 0.421211 | 0.923 |
| GSTCD     | 0.47 | 0.397586 | 0.911 |
| HEXIM1    | 0.47 | 0.397586 | 0.911 |
| HIST1H4G  | 0.47 | 0.397586 | 0.911 |
| HOXA9     | 0.47 | 0.397585 | 0.911 |
| INCA1     | 0.47 | 0.421211 | 0.923 |
| INTS9     | 0.47 | 0.421211 | 0.923 |
| IQSEC3    | 0.47 | 0.397585 | 0.911 |
| KAT6B     | 0.47 | 0.42121  | 0.923 |
| KATNAL2   | 0.47 | 0.397586 | 0.911 |
| KLF15     | 0.47 | 0.397585 | 0.911 |
| LEFTY2    | 0.47 | 0.397586 | 0.911 |
| LONP1     | 0.47 | 0.447511 | 0.924 |
| MAN2A2    | 0.47 | 0.397585 | 0.911 |
| MCIDAS    | 0.47 | 0.397586 | 0.911 |
| METTL25   | 0.47 | 0.397585 | 0.911 |
| MICALL1   | 0.47 | 0.397585 | 0.911 |
| MLXIP     | 0.47 | 0.476357 | 0.928 |
| MRPL41    | 0.47 | 0.476358 | 0.928 |
| NCAPD3    | 0.47 | 0.397585 | 0.911 |
| NT5C1B-RD | 0.47 | 0.397586 | 0.911 |
| NUP214    | 0.47 | 0.421211 | 0.923 |
| OCLN      | 0.47 | 0.397586 | 0.911 |
| OLA1      | 0.47 | 0.397585 | 0.911 |
| OR4F16    | 0.47 | 0.397585 | 0.911 |
| OR4F29    | 0.47 | 0.397585 | 0.911 |
| OR4F3     | 0.47 | 0.397585 | 0.911 |
| OR52J3    | 0.47 | 0.397585 | 0.911 |
| OR5L2     | 0.47 | 0.397585 | 0.911 |
| OR6C76    | 0.47 | 0.397586 | 0.911 |
| OSGEPL1   | 0.47 | 0.397585 | 0.911 |
| PARP6     | 0.47 | 0.397586 | 0.911 |
| PODNL1    | 0.47 | 0.397585 | 0.911 |
| POLR1E    | 0.47 | 0.421211 | 0.923 |
| POMC      | 0.47 | 0.397585 | 0.911 |
| PPP2R5A   | 0.47 | 0.397586 | 0.911 |
| PXDNL     | 0.47 | 0.397585 | 0.911 |
| RBM7      | 0.47 | 0.42121  | 0.923 |
| RGMB      | 0.47 | 0.421211 | 0.923 |
| ROS1      | 0.47 | 0.397585 | 0.911 |
| RRS1      | 0.47 | 0.447511 | 0.924 |
| SDF2      | 0.47 | 0.397585 | 0.911 |
| SH2D4A    | 0.47 | 0.421211 | 0.923 |

|          |      |          |       |
|----------|------|----------|-------|
| SIPA1L1  | 0.47 | 0.397586 | 0.911 |
| SLC22A1  | 0.47 | 0.397585 | 0.911 |
| SLC40A1  | 0.47 | 0.397586 | 0.911 |
| SLIRP    | 0.47 | 0.397586 | 0.911 |
| SMIM3    | 0.47 | 0.42121  | 0.923 |
| SPDL1    | 0.47 | 0.397585 | 0.911 |
| SREK1IP1 | 0.47 | 0.421211 | 0.923 |
| SYT9     | 0.47 | 0.447511 | 0.924 |
| TDRP     | 0.47 | 0.397586 | 0.911 |
| TEKT2    | 0.47 | 0.397585 | 0.911 |
| TEX261   | 0.47 | 0.397586 | 0.911 |
| THADA    | 0.47 | 0.397586 | 0.911 |
| THOC5    | 0.47 | 0.421211 | 0.923 |
| TLCD2    | 0.47 | 0.397586 | 0.911 |
| TPPP2    | 0.47 | 0.397585 | 0.911 |
| USP40    | 0.47 | 0.397586 | 0.911 |
| WDR3     | 0.47 | 0.476358 | 0.928 |
| WDR60    | 0.47 | 0.397585 | 0.911 |
| WNT11    | 0.47 | 0.397586 | 0.911 |
| XKR7     | 0.47 | 0.397585 | 0.911 |
| ZGRF1    | 0.47 | 0.397585 | 0.911 |
| ZNF132   | 0.47 | 0.397585 | 0.911 |
| ZNF587   | 0.47 | 0.397585 | 0.911 |
| ZNF787   | 0.47 | 0.397586 | 0.911 |
| ZNF814   | 0.47 | 0.397585 | 0.911 |
| ACOT1    | 0.48 | 0.387903 | 0.908 |
| ACSL6    | 0.48 | 0.387903 | 0.908 |
| ADAMTS17 | 0.48 | 0.387903 | 0.908 |
| ADAMTS20 | 0.48 | 0.411665 | 0.919 |
| ALAD     | 0.48 | 0.411665 | 0.919 |
| ALDH1A1  | 0.48 | 0.387903 | 0.908 |
| ALDH7A1  | 0.48 | 0.387903 | 0.908 |
| ANKRD30B | 0.48 | 0.387902 | 0.908 |
| APOO     | 0.48 | 0.387903 | 0.908 |
| BTBD17   | 0.48 | 0.387903 | 0.908 |
| BTRC     | 0.48 | 0.387903 | 0.908 |
| C9orf156 | 0.48 | 0.387903 | 0.908 |
| C9orf163 | 0.48 | 0.387903 | 0.908 |
| CCDC47   | 0.48 | 0.387902 | 0.908 |
| CDX4     | 0.48 | 0.387903 | 0.908 |
| CHST8    | 0.48 | 0.411666 | 0.919 |
| COA1     | 0.48 | 0.387903 | 0.908 |
| COMMD2   | 0.48 | 0.411665 | 0.919 |
| DCTD     | 0.48 | 0.387903 | 0.908 |
| DIS3L    | 0.48 | 0.411665 | 0.919 |
| DPY19L3  | 0.48 | 0.387903 | 0.908 |
| DUSP4    | 0.48 | 0.387903 | 0.908 |

|          |      |          |       |
|----------|------|----------|-------|
| EIF4B    | 0.48 | 0.387903 | 0.908 |
| ERF      | 0.48 | 0.411666 | 0.919 |
| EVX1     | 0.48 | 0.387903 | 0.908 |
| FAHD1    | 0.48 | 0.387902 | 0.908 |
| FAM103A1 | 0.48 | 0.387903 | 0.908 |
| FBL      | 0.48 | 0.411666 | 0.919 |
| FGF16    | 0.48 | 0.387903 | 0.908 |
| FHIT     | 0.48 | 0.387902 | 0.908 |
| FHL3     | 0.48 | 0.387902 | 0.908 |
| FRMD1    | 0.48 | 0.387903 | 0.908 |
| FUT1     | 0.48 | 0.411665 | 0.919 |
| GABRP    | 0.48 | 0.387903 | 0.908 |
| GPR98    | 0.48 | 0.438164 | 0.924 |
| GRIK3    | 0.48 | 0.387903 | 0.908 |
| HPX      | 0.48 | 0.387902 | 0.908 |
| HRASLS5  | 0.48 | 0.387902 | 0.908 |
| IMMP1L   | 0.48 | 0.387903 | 0.908 |
| IRG1     | 0.48 | 0.387902 | 0.908 |
| ITPKA    | 0.48 | 0.387903 | 0.908 |
| JPH1     | 0.48 | 0.387903 | 0.908 |
| KANK2    | 0.48 | 0.411665 | 0.919 |
| KBTBD3   | 0.48 | 0.387903 | 0.908 |
| KCNB2    | 0.48 | 0.387903 | 0.908 |
| KIF26B   | 0.48 | 0.387903 | 0.908 |
| LECT2    | 0.48 | 0.387903 | 0.908 |
| LY6H     | 0.48 | 0.387902 | 0.908 |
| LYSMD3   | 0.48 | 0.387902 | 0.908 |
| MAMLD1   | 0.48 | 0.387903 | 0.908 |
| MMP11    | 0.48 | 0.387903 | 0.908 |
| MRGPRE   | 0.48 | 0.387903 | 0.908 |
| MRPL44   | 0.48 | 0.411666 | 0.919 |
| MTERFD3  | 0.48 | 0.387903 | 0.908 |
| MYO1C    | 0.48 | 0.387903 | 0.908 |
| MYOD1    | 0.48 | 0.387903 | 0.908 |
| NDUFA11  | 0.48 | 0.387903 | 0.908 |
| PNPLA5   | 0.48 | 0.387903 | 0.908 |
| POLD1    | 0.48 | 0.438164 | 0.924 |
| POSTN    | 0.48 | 0.387903 | 0.908 |
| POU4F2   | 0.48 | 0.387903 | 0.908 |
| PRKAA2   | 0.48 | 0.387903 | 0.908 |
| PSMA7    | 0.48 | 0.467234 | 0.928 |
| PSMC2    | 0.48 | 0.438164 | 0.924 |
| PTGS2    | 0.48 | 0.387902 | 0.908 |
| PTPN9    | 0.48 | 0.387903 | 0.908 |
| PYGO2    | 0.48 | 0.387903 | 0.908 |
| RNF170   | 0.48 | 0.387903 | 0.908 |
| RNF32    | 0.48 | 0.387903 | 0.908 |

|           |      |          |       |
|-----------|------|----------|-------|
| RSAD1     | 0.48 | 0.438163 | 0.924 |
| SAMD11    | 0.48 | 0.387903 | 0.908 |
| SCG5      | 0.48 | 0.411665 | 0.919 |
| SCGB1D1   | 0.48 | 0.387903 | 0.908 |
| SHOC2     | 0.48 | 0.411665 | 0.919 |
| SI        | 0.48 | 0.387903 | 0.908 |
| SIRPG     | 0.48 | 0.387903 | 0.908 |
| SLC22A24  | 0.48 | 0.387902 | 0.908 |
| SLC8A2    | 0.48 | 0.411665 | 0.919 |
| SNUPN     | 0.48 | 0.411665 | 0.919 |
| SNX16     | 0.48 | 0.387903 | 0.908 |
| SPC25     | 0.48 | 0.438164 | 0.924 |
| STH       | 0.48 | 0.387903 | 0.908 |
| STON1     | 0.48 | 0.387902 | 0.908 |
| STXBP6    | 0.48 | 0.387902 | 0.908 |
| SYCP1     | 0.48 | 0.387902 | 0.908 |
| TAS2R40   | 0.48 | 0.387903 | 0.908 |
| TMEM151B  | 0.48 | 0.387903 | 0.908 |
| TMEM80    | 0.48 | 0.387903 | 0.908 |
| TTC23L    | 0.48 | 0.387903 | 0.908 |
| TXNDC9    | 0.48 | 0.387903 | 0.908 |
| VAT1      | 0.48 | 0.387903 | 0.908 |
| ZMAT4     | 0.48 | 0.387903 | 0.908 |
| ZNF567    | 0.48 | 0.387903 | 0.908 |
| ZNF75D    | 0.48 | 0.387903 | 0.908 |
| ZNF808    | 0.48 | 0.387903 | 0.908 |
| ZNF878    | 0.48 | 0.387903 | 0.908 |
| ABCC10    | 0.49 | 0.378307 | 0.908 |
| ADAMTS12  | 0.49 | 0.378308 | 0.908 |
| ADGB      | 0.49 | 0.458263 | 0.924 |
| ALYREF    | 0.49 | 0.378308 | 0.908 |
| ANKRD35   | 0.49 | 0.402272 | 0.917 |
| ATP10A    | 0.49 | 0.378308 | 0.908 |
| B4GALT1   | 0.49 | 0.378308 | 0.908 |
| BIN1      | 0.49 | 0.378307 | 0.908 |
| C14orf177 | 0.49 | 0.378308 | 0.908 |
| C2orf76   | 0.49 | 0.378308 | 0.908 |
| CAPN11    | 0.49 | 0.378307 | 0.908 |
| CCDC80    | 0.49 | 0.378308 | 0.908 |
| CCL21     | 0.49 | 0.378308 | 0.908 |
| CCNI2     | 0.49 | 0.378308 | 0.908 |
| CD9       | 0.49 | 0.402273 | 0.917 |
| CEP41     | 0.49 | 0.378308 | 0.908 |
| CEP63     | 0.49 | 0.402272 | 0.917 |
| CLASP2    | 0.49 | 0.378308 | 0.908 |
| CMKLR1    | 0.49 | 0.378307 | 0.908 |
| CNR2      | 0.49 | 0.378308 | 0.908 |

|          |      |          |       |
|----------|------|----------|-------|
| CSPG4    | 0.49 | 0.378307 | 0.908 |
| CYB5R1   | 0.49 | 0.378308 | 0.908 |
| DENND3   | 0.49 | 0.378308 | 0.908 |
| DGCR6L   | 0.49 | 0.378308 | 0.908 |
| DUSP14   | 0.49 | 0.378308 | 0.908 |
| EPX      | 0.49 | 0.378308 | 0.908 |
| FBN3     | 0.49 | 0.402273 | 0.917 |
| GALNT6   | 0.49 | 0.402273 | 0.917 |
| GFRAL    | 0.49 | 0.378308 | 0.908 |
| GIMAP5   | 0.49 | 0.378308 | 0.908 |
| GLTSCR1L | 0.49 | 0.378308 | 0.908 |
| GP1BB    | 0.49 | 0.378307 | 0.908 |
| GPRC5D   | 0.49 | 0.378308 | 0.908 |
| HCLS1    | 0.49 | 0.428939 | 0.924 |
| HIATL1   | 0.49 | 0.378308 | 0.908 |
| HNRNPA1  | 0.49 | 0.378308 | 0.908 |
| HOXC4    | 0.49 | 0.378308 | 0.908 |
| IFITM5   | 0.49 | 0.378307 | 0.908 |
| IGSF6    | 0.49 | 0.378308 | 0.908 |
| IP6K1    | 0.49 | 0.378308 | 0.908 |
| IQCF6    | 0.49 | 0.378307 | 0.908 |
| ITGA8    | 0.49 | 0.378307 | 0.908 |
| JMJD8    | 0.49 | 0.378308 | 0.908 |
| KANK3    | 0.49 | 0.378307 | 0.908 |
| KBTBD4   | 0.49 | 0.402272 | 0.917 |
| KCNQ2    | 0.49 | 0.402273 | 0.917 |
| KIRREL2  | 0.49 | 0.378308 | 0.908 |
| LCE4A    | 0.49 | 0.378307 | 0.908 |
| LRRC8B   | 0.49 | 0.378308 | 0.908 |
| LTA4H    | 0.49 | 0.378308 | 0.908 |
| LUZP4    | 0.49 | 0.378308 | 0.908 |
| MAOA     | 0.49 | 0.42894  | 0.924 |
| MTHFS    | 0.49 | 0.378308 | 0.908 |
| MYO10    | 0.49 | 0.378307 | 0.908 |
| NBN      | 0.49 | 0.378308 | 0.908 |
| NKX2-8   | 0.49 | 0.378308 | 0.908 |
| OPTC     | 0.49 | 0.378308 | 0.908 |
| OR10Q1   | 0.49 | 0.378308 | 0.908 |
| OR51E2   | 0.49 | 0.428939 | 0.924 |
| P2RX7    | 0.49 | 0.378308 | 0.908 |
| PACRGL   | 0.49 | 0.378308 | 0.908 |
| PAQR4    | 0.49 | 0.378308 | 0.908 |
| PCDHA12  | 0.49 | 0.378308 | 0.908 |
| PDE8A    | 0.49 | 0.378308 | 0.908 |
| PLEKHA7  | 0.49 | 0.378308 | 0.908 |
| PRKRIP1  | 0.49 | 0.378307 | 0.908 |
| PRSS35   | 0.49 | 0.378307 | 0.908 |

|            |      |          |       |
|------------|------|----------|-------|
| PTGIS      | 0.49 | 0.378308 | 0.908 |
| REL        | 0.49 | 0.378308 | 0.908 |
| REV3L      | 0.49 | 0.378308 | 0.908 |
| RPS20      | 0.49 | 0.378307 | 0.908 |
| S100A12    | 0.49 | 0.378308 | 0.908 |
| SLC25A20   | 0.49 | 0.378308 | 0.908 |
| SLFN11     | 0.49 | 0.378308 | 0.908 |
| SNX1       | 0.49 | 0.378308 | 0.908 |
| SPINK7     | 0.49 | 0.378308 | 0.908 |
| SYNE3      | 0.49 | 0.378307 | 0.908 |
| TAAR6      | 0.49 | 0.378308 | 0.908 |
| TBXA2R     | 0.49 | 0.402272 | 0.917 |
| TGS1       | 0.49 | 0.378308 | 0.908 |
| TMEM216    | 0.49 | 0.378308 | 0.908 |
| TRIM39     | 0.49 | 0.378308 | 0.908 |
| TSFM       | 0.49 | 0.378308 | 0.908 |
| USP10      | 0.49 | 0.378307 | 0.908 |
| USP14      | 0.49 | 0.378308 | 0.908 |
| YIF1A      | 0.49 | 0.402272 | 0.917 |
| ZDHHC1     | 0.49 | 0.378308 | 0.908 |
| ZNF706     | 0.49 | 0.378308 | 0.908 |
| ACSBG2     | 0.5  | 0.368922 | 0.905 |
| ADGRB1     | 0.5  | 0.368922 | 0.905 |
| ANKRD16    | 0.5  | 0.392985 | 0.911 |
| BCL2L2-PAE | 0.5  | 0.368922 | 0.905 |
| C11orf85   | 0.5  | 0.368923 | 0.905 |
| C14orf1    | 0.5  | 0.368922 | 0.905 |
| C17orf59   | 0.5  | 0.368922 | 0.905 |
| C1orf173   | 0.5  | 0.368922 | 0.905 |
| CAD        | 0.5  | 0.368922 | 0.905 |
| CCDC127    | 0.5  | 0.368922 | 0.905 |
| CCDC42B    | 0.5  | 0.392985 | 0.911 |
| CCDC96     | 0.5  | 0.392985 | 0.911 |
| CEACAM19   | 0.5  | 0.368922 | 0.905 |
| CFTR       | 0.5  | 0.368922 | 0.905 |
| CORO1A     | 0.5  | 0.368922 | 0.905 |
| CPB1       | 0.5  | 0.368922 | 0.905 |
| CXXC1      | 0.5  | 0.368922 | 0.905 |
| DCAF4L2    | 0.5  | 0.368922 | 0.905 |
| DENND1B    | 0.5  | 0.368922 | 0.905 |
| DEPDC1     | 0.5  | 0.368922 | 0.905 |
| DGCR2      | 0.5  | 0.368922 | 0.905 |
| DVL2       | 0.5  | 0.368922 | 0.905 |
| EID2       | 0.5  | 0.368922 | 0.905 |
| ENOX2      | 0.5  | 0.368922 | 0.905 |
| FAM13A     | 0.5  | 0.368922 | 0.905 |
| FAM86B1    | 0.5  | 0.368923 | 0.905 |

|           |     |          |       |
|-----------|-----|----------|-------|
| FCGBP     | 0.5 | 0.368922 | 0.905 |
| GALNT12   | 0.5 | 0.368922 | 0.905 |
| GLT8D2    | 0.5 | 0.368922 | 0.905 |
| GRIN1     | 0.5 | 0.392986 | 0.911 |
| HIPK4     | 0.5 | 0.368923 | 0.905 |
| HIST1H2BE | 0.5 | 0.368922 | 0.905 |
| HMGCLL1   | 0.5 | 0.368922 | 0.905 |
| HRH3      | 0.5 | 0.368922 | 0.905 |
| IFIH1     | 0.5 | 0.368922 | 0.905 |
| IL11RA    | 0.5 | 0.368922 | 0.905 |
| IL1RL1    | 0.5 | 0.368922 | 0.905 |
| IL2RB     | 0.5 | 0.368923 | 0.905 |
| IRS2      | 0.5 | 0.368922 | 0.905 |
| KLHL11    | 0.5 | 0.392985 | 0.911 |
| KRT222    | 0.5 | 0.368923 | 0.905 |
| LCE6A     | 0.5 | 0.368923 | 0.905 |
| LINGO1    | 0.5 | 0.392985 | 0.911 |
| LIPN      | 0.5 | 0.368923 | 0.905 |
| LONRF2    | 0.5 | 0.392985 | 0.911 |
| LPAR5     | 0.5 | 0.368922 | 0.905 |
| LSM10     | 0.5 | 0.368922 | 0.905 |
| MDC1      | 0.5 | 0.419847 | 0.923 |
| MED22     | 0.5 | 0.392985 | 0.911 |
| MLLT3     | 0.5 | 0.368922 | 0.905 |
| MMP21     | 0.5 | 0.368922 | 0.905 |
| MRC1      | 0.5 | 0.368922 | 0.905 |
| NABP1     | 0.5 | 0.368922 | 0.905 |
| NFIB      | 0.5 | 0.368922 | 0.905 |
| NPY       | 0.5 | 0.368922 | 0.905 |
| NSUN7     | 0.5 | 0.368922 | 0.905 |
| OPLAH     | 0.5 | 0.368922 | 0.905 |
| OR10H4    | 0.5 | 0.368922 | 0.905 |
| OR4C15    | 0.5 | 0.368922 | 0.905 |
| OR4D9     | 0.5 | 0.368923 | 0.905 |
| OR6K6     | 0.5 | 0.368923 | 0.905 |
| OR8B8     | 0.5 | 0.368922 | 0.905 |
| PABPC1    | 0.5 | 0.392985 | 0.911 |
| PAK4      | 0.5 | 0.368923 | 0.905 |
| PEF1      | 0.5 | 0.368922 | 0.905 |
| PLAA      | 0.5 | 0.368922 | 0.905 |
| PMEPA1    | 0.5 | 0.368922 | 0.905 |
| POU5F1B   | 0.5 | 0.368922 | 0.905 |
| PPP1R14C  | 0.5 | 0.392985 | 0.911 |
| PPP1R3D   | 0.5 | 0.368922 | 0.905 |
| RAB33A    | 0.5 | 0.368922 | 0.905 |
| RABGAP1   | 0.5 | 0.368922 | 0.905 |
| RPAP3     | 0.5 | 0.368922 | 0.905 |

|          |      |          |       |
|----------|------|----------|-------|
| RRM2     | 0.5  | 0.519179 | 0.938 |
| RUNX1    | 0.5  | 0.392986 | 0.911 |
| SGSM2    | 0.5  | 0.368922 | 0.905 |
| SHISA5   | 0.5  | 0.368922 | 0.905 |
| SLC38A6  | 0.5  | 0.368922 | 0.905 |
| SMURF1   | 0.5  | 0.368923 | 0.905 |
| SNRPD2   | 0.5  | 0.419847 | 0.923 |
| SNX7     | 0.5  | 0.368922 | 0.905 |
| SPINK14  | 0.5  | 0.368922 | 0.905 |
| STX4     | 0.5  | 0.368922 | 0.905 |
| SULT1C3  | 0.5  | 0.368922 | 0.905 |
| TGM7     | 0.5  | 0.368922 | 0.905 |
| TMEM253  | 0.5  | 0.368922 | 0.905 |
| TSGA13   | 0.5  | 0.368922 | 0.905 |
| WEE2     | 0.5  | 0.368922 | 0.905 |
| YIF1B    | 0.5  | 0.368922 | 0.905 |
| YTHDF1   | 0.5  | 0.368923 | 0.905 |
| ZBTB8B   | 0.5  | 0.368923 | 0.905 |
| ZFPM2    | 0.5  | 0.368923 | 0.905 |
| ZNF236   | 0.5  | 0.368922 | 0.905 |
| AAED1    | 0.51 | 0.38384  | 0.908 |
| ACSL1    | 0.51 | 0.359633 | 0.904 |
| ADCK1    | 0.51 | 0.359634 | 0.904 |
| ADH7     | 0.51 | 0.359633 | 0.904 |
| AK3      | 0.51 | 0.359634 | 0.904 |
| ANKLE2   | 0.51 | 0.440671 | 0.924 |
| ANKRD65  | 0.51 | 0.38384  | 0.908 |
| APPBP2   | 0.51 | 0.359634 | 0.904 |
| AQP8     | 0.51 | 0.383841 | 0.908 |
| ARCN1    | 0.51 | 0.359634 | 0.904 |
| ATXN7L3B | 0.51 | 0.359634 | 0.904 |
| BCAT2    | 0.51 | 0.359634 | 0.904 |
| BOLA3    | 0.51 | 0.359634 | 0.904 |
| BSPRY    | 0.51 | 0.359634 | 0.904 |
| C1orf111 | 0.51 | 0.359634 | 0.904 |
| C1orf159 | 0.51 | 0.359634 | 0.904 |
| C21orf62 | 0.51 | 0.359634 | 0.904 |
| CARD10   | 0.51 | 0.38384  | 0.908 |
| CD1E     | 0.51 | 0.359633 | 0.904 |
| CDH20    | 0.51 | 0.359633 | 0.904 |
| CELF2    | 0.51 | 0.359634 | 0.904 |
| CIDEB    | 0.51 | 0.359634 | 0.904 |
| CILP2    | 0.51 | 0.359633 | 0.904 |
| CREB1    | 0.51 | 0.359634 | 0.904 |
| CYR61    | 0.51 | 0.359634 | 0.904 |
| DARS     | 0.51 | 0.38384  | 0.908 |
| DNASE2   | 0.51 | 0.359634 | 0.904 |

|         |      |          |       |
|---------|------|----------|-------|
| DRAXIN  | 0.51 | 0.359634 | 0.904 |
| ERCC6L  | 0.51 | 0.38384  | 0.908 |
| FOPNL   | 0.51 | 0.359633 | 0.904 |
| FUT11   | 0.51 | 0.38384  | 0.908 |
| GAP43   | 0.51 | 0.383841 | 0.908 |
| GLIPR1  | 0.51 | 0.359634 | 0.904 |
| GNG8    | 0.51 | 0.359634 | 0.904 |
| GRIN3B  | 0.51 | 0.38384  | 0.908 |
| GULP1   | 0.51 | 0.359634 | 0.904 |
| HYAL3   | 0.51 | 0.359633 | 0.904 |
| IER5    | 0.51 | 0.359633 | 0.904 |
| IL18R1  | 0.51 | 0.359633 | 0.904 |
| ILKAP   | 0.51 | 0.359634 | 0.904 |
| INA     | 0.51 | 0.359633 | 0.904 |
| IRAK3   | 0.51 | 0.383841 | 0.908 |
| JAM2    | 0.51 | 0.38384  | 0.908 |
| KLC4    | 0.51 | 0.359634 | 0.904 |
| KRT85   | 0.51 | 0.359634 | 0.904 |
| LILRB4  | 0.51 | 0.38384  | 0.908 |
| LRRC3   | 0.51 | 0.359634 | 0.904 |
| LRRC48  | 0.51 | 0.359634 | 0.904 |
| LRRTM2  | 0.51 | 0.359633 | 0.904 |
| METTL10 | 0.51 | 0.359633 | 0.904 |
| MRPL24  | 0.51 | 0.359633 | 0.904 |
| MTHFD1L | 0.51 | 0.359634 | 0.904 |
| MTPAP   | 0.51 | 0.359634 | 0.904 |
| MYBPC1  | 0.51 | 0.38384  | 0.908 |
| NAGPA   | 0.51 | 0.359633 | 0.904 |
| NBPF7   | 0.51 | 0.359634 | 0.904 |
| NDUFS7  | 0.51 | 0.359634 | 0.904 |
| NEO1    | 0.51 | 0.38384  | 0.908 |
| NOS1    | 0.51 | 0.38384  | 0.908 |
| OPRD1   | 0.51 | 0.359634 | 0.904 |
| OR10A6  | 0.51 | 0.359634 | 0.904 |
| OR4S2   | 0.51 | 0.359633 | 0.904 |
| OST4    | 0.51 | 0.47354  | 0.928 |
| PHF7    | 0.51 | 0.359633 | 0.904 |
| PHOX2A  | 0.51 | 0.359634 | 0.904 |
| PIGO    | 0.51 | 0.38384  | 0.908 |
| PKD1L2  | 0.51 | 0.359634 | 0.904 |
| PNPLA3  | 0.51 | 0.359634 | 0.904 |
| PROS1   | 0.51 | 0.359634 | 0.904 |
| PSG11   | 0.51 | 0.359634 | 0.904 |
| RFK     | 0.51 | 0.359633 | 0.904 |
| RFX1    | 0.51 | 0.359633 | 0.904 |
| RGL3    | 0.51 | 0.359634 | 0.904 |
| RNF113B | 0.51 | 0.38384  | 0.908 |

|          |      |          |       |
|----------|------|----------|-------|
| RNF141   | 0.51 | 0.359634 | 0.904 |
| RPL22    | 0.51 | 0.440671 | 0.924 |
| RPUSD3   | 0.51 | 0.359634 | 0.904 |
| RWDD1    | 0.51 | 0.359633 | 0.904 |
| SACS     | 0.51 | 0.359634 | 0.904 |
| SLC47A1  | 0.51 | 0.359634 | 0.904 |
| SMARCA5  | 0.51 | 0.359633 | 0.904 |
| SMC4     | 0.51 | 0.383841 | 0.908 |
| SPNS2    | 0.51 | 0.38384  | 0.908 |
| SPRN     | 0.51 | 0.359634 | 0.904 |
| SRRM3    | 0.51 | 0.359633 | 0.904 |
| STAR     | 0.51 | 0.38384  | 0.908 |
| TAAR1    | 0.51 | 0.359634 | 0.904 |
| TAOK3    | 0.51 | 0.359633 | 0.904 |
| THUMPD3  | 0.51 | 0.359634 | 0.904 |
| TMEM132D | 0.51 | 0.359634 | 0.904 |
| TMEM2    | 0.51 | 0.359634 | 0.904 |
| UBA6     | 0.51 | 0.359634 | 0.904 |
| WASF1    | 0.51 | 0.359633 | 0.904 |
| WISP1    | 0.51 | 0.359633 | 0.904 |
| WVOX     | 0.51 | 0.38384  | 0.908 |
| XPO5     | 0.51 | 0.38384  | 0.908 |
| ZNF224   | 0.51 | 0.359634 | 0.904 |
| ZNF415   | 0.51 | 0.359634 | 0.904 |
| ZNF423   | 0.51 | 0.38384  | 0.908 |
| ZNF536   | 0.51 | 0.359634 | 0.904 |
| ZNF689   | 0.51 | 0.359634 | 0.904 |
| ZP2      | 0.51 | 0.359633 | 0.904 |
| ABHD4    | 0.52 | 0.350572 | 0.904 |
| AHDC1    | 0.52 | 0.350572 | 0.904 |
| AKR1C3   | 0.52 | 0.350572 | 0.904 |
| ANKRD55  | 0.52 | 0.350572 | 0.904 |
| AWAT2    | 0.52 | 0.350572 | 0.904 |
| BCL2L15  | 0.52 | 0.350572 | 0.904 |
| BFSP1    | 0.52 | 0.350572 | 0.904 |
| BOP1     | 0.52 | 0.401998 | 0.917 |
| C12orf65 | 0.52 | 0.350572 | 0.904 |
| C15orf61 | 0.52 | 0.350572 | 0.904 |
| C17orf51 | 0.52 | 0.350572 | 0.904 |
| C2orf71  | 0.52 | 0.374797 | 0.908 |
| C3orf27  | 0.52 | 0.350573 | 0.904 |
| C4A      | 0.52 | 0.350572 | 0.904 |
| CA11     | 0.52 | 0.350572 | 0.904 |
| CAPS     | 0.52 | 0.350572 | 0.904 |
| CATSPER2 | 0.52 | 0.350572 | 0.904 |
| CCRL2    | 0.52 | 0.350572 | 0.904 |
| CD68     | 0.52 | 0.43198  | 0.924 |

|         |      |          |       |
|---------|------|----------|-------|
| CFB     | 0.52 | 0.350573 | 0.904 |
| CHST6   | 0.52 | 0.350572 | 0.904 |
| COL9A1  | 0.52 | 0.350572 | 0.904 |
| CSMD2   | 0.52 | 0.374797 | 0.908 |
| CYP3A5  | 0.52 | 0.350572 | 0.904 |
| DGKI    | 0.52 | 0.374797 | 0.908 |
| EFEMP2  | 0.52 | 0.374797 | 0.908 |
| EFNB2   | 0.52 | 0.350572 | 0.904 |
| EMP1    | 0.52 | 0.350572 | 0.904 |
| FBXO5   | 0.52 | 0.350572 | 0.904 |
| FNDC3A  | 0.52 | 0.350572 | 0.904 |
| FRRS1   | 0.52 | 0.350572 | 0.904 |
| FXVD2   | 0.52 | 0.350572 | 0.904 |
| GABRE   | 0.52 | 0.350572 | 0.904 |
| GDAP1   | 0.52 | 0.350572 | 0.904 |
| GLB1L3  | 0.52 | 0.350573 | 0.904 |
| GORASP1 | 0.52 | 0.350572 | 0.904 |
| GPR139  | 0.52 | 0.350572 | 0.904 |
| GTPBP1  | 0.52 | 0.374797 | 0.908 |
| HDHD3   | 0.52 | 0.374797 | 0.908 |
| HGD     | 0.52 | 0.350572 | 0.904 |
| HORMAD1 | 0.52 | 0.350573 | 0.904 |
| HSPA12A | 0.52 | 0.350572 | 0.904 |
| INSL5   | 0.52 | 0.350572 | 0.904 |
| JMY     | 0.52 | 0.401998 | 0.917 |
| KERA    | 0.52 | 0.350572 | 0.904 |
| LPAR2   | 0.52 | 0.350572 | 0.904 |
| LSMEM2  | 0.52 | 0.350572 | 0.904 |
| MAST3   | 0.52 | 0.350572 | 0.904 |
| MED7    | 0.52 | 0.350572 | 0.904 |
| MOAP1   | 0.52 | 0.350572 | 0.904 |
| MRM1    | 0.52 | 0.350572 | 0.904 |
| MRPL22  | 0.52 | 0.401998 | 0.917 |
| MRPL4   | 0.52 | 0.350572 | 0.904 |
| MRPL48  | 0.52 | 0.401998 | 0.917 |
| MTUS1   | 0.52 | 0.350572 | 0.904 |
| MYH10   | 0.52 | 0.374797 | 0.908 |
| NGLY1   | 0.52 | 0.350572 | 0.904 |
| NHP2L1  | 0.52 | 0.401998 | 0.917 |
| NUMA1   | 0.52 | 0.350572 | 0.904 |
| NXNL1   | 0.52 | 0.374797 | 0.908 |
| OR5M11  | 0.52 | 0.350572 | 0.904 |
| PAQR8   | 0.52 | 0.350573 | 0.904 |
| PDZD4   | 0.52 | 0.350573 | 0.904 |
| PIK3C2G | 0.52 | 0.350572 | 0.904 |
| PPIAL4D | 0.52 | 0.350572 | 0.904 |
| PPP2R3A | 0.52 | 0.350573 | 0.904 |

|          |      |          |       |
|----------|------|----------|-------|
| PRDM13   | 0.52 | 0.350572 | 0.904 |
| PTAFR    | 0.52 | 0.350572 | 0.904 |
| PUS3     | 0.52 | 0.350572 | 0.904 |
| PYCRL    | 0.52 | 0.350572 | 0.904 |
| SERPINI1 | 0.52 | 0.350572 | 0.904 |
| SETD2    | 0.52 | 0.401998 | 0.917 |
| SLC16A4  | 0.52 | 0.350572 | 0.904 |
| SLC6A16  | 0.52 | 0.350572 | 0.904 |
| SLFN5    | 0.52 | 0.374797 | 0.908 |
| SMAD7    | 0.52 | 0.350572 | 0.904 |
| SMARCAL1 | 0.52 | 0.350572 | 0.904 |
| SRM      | 0.52 | 0.350572 | 0.904 |
| SRRM5    | 0.52 | 0.350572 | 0.904 |
| TCEAL2   | 0.52 | 0.350572 | 0.904 |
| TCIRG1   | 0.52 | 0.350572 | 0.904 |
| TMEM260  | 0.52 | 0.350572 | 0.904 |
| TNFRSF18 | 0.52 | 0.350572 | 0.904 |
| TRIM62   | 0.52 | 0.350572 | 0.904 |
| TRIM72   | 0.52 | 0.401998 | 0.917 |
| UBXN4    | 0.52 | 0.350572 | 0.904 |
| VCPIP1   | 0.52 | 0.350573 | 0.904 |
| VSIG10   | 0.52 | 0.350572 | 0.904 |
| WNT8A    | 0.52 | 0.350572 | 0.904 |
| YJEFN3   | 0.52 | 0.350572 | 0.904 |
| ZNF213   | 0.52 | 0.350572 | 0.904 |
| ZNF43    | 0.52 | 0.350573 | 0.904 |
| ZNF836   | 0.52 | 0.350572 | 0.904 |
| ACN9     | 0.53 | 0.341654 | 0.904 |
| ADM2     | 0.53 | 0.341654 | 0.904 |
| ALOX15   | 0.53 | 0.365907 | 0.905 |
| ALS2CL   | 0.53 | 0.341654 | 0.904 |
| AP3D1    | 0.53 | 0.341654 | 0.904 |
| APPL2    | 0.53 | 0.341654 | 0.904 |
| BLM      | 0.53 | 0.341654 | 0.904 |
| BMPER    | 0.53 | 0.341654 | 0.904 |
| C12orf42 | 0.53 | 0.341654 | 0.904 |
| CACNB4   | 0.53 | 0.341654 | 0.904 |
| CARF     | 0.53 | 0.341654 | 0.904 |
| CCDC174  | 0.53 | 0.341654 | 0.904 |
| CCRN4L   | 0.53 | 0.341654 | 0.904 |
| CCT6A    | 0.53 | 0.365907 | 0.905 |
| CD58     | 0.53 | 0.341654 | 0.904 |
| CEP112   | 0.53 | 0.341654 | 0.904 |
| COL1A2   | 0.53 | 0.341654 | 0.904 |
| CTSV     | 0.53 | 0.341654 | 0.904 |
| DLX6     | 0.53 | 0.341654 | 0.904 |
| FAM155B  | 0.53 | 0.341654 | 0.904 |

|          |      |          |       |
|----------|------|----------|-------|
| FAM173B  | 0.53 | 0.341654 | 0.904 |
| FGF3     | 0.53 | 0.341654 | 0.904 |
| GOLGA6C  | 0.53 | 0.341654 | 0.904 |
| GUCY2D   | 0.53 | 0.341654 | 0.904 |
| H2AFY    | 0.53 | 0.341654 | 0.904 |
| HRK      | 0.53 | 0.423412 | 0.923 |
| IFNL1    | 0.53 | 0.341654 | 0.904 |
| IL1B     | 0.53 | 0.341654 | 0.904 |
| ILK      | 0.53 | 0.341654 | 0.904 |
| KCND1    | 0.53 | 0.341654 | 0.904 |
| KCNJ2    | 0.53 | 0.341655 | 0.904 |
| KCNK17   | 0.53 | 0.365906 | 0.905 |
| LCNL1    | 0.53 | 0.341654 | 0.904 |
| LMBR1L   | 0.53 | 0.341655 | 0.904 |
| M6PR     | 0.53 | 0.341654 | 0.904 |
| MCF2L2   | 0.53 | 0.341654 | 0.904 |
| MT1A     | 0.53 | 0.393314 | 0.911 |
| NDUFB7   | 0.53 | 0.393314 | 0.911 |
| NLRP7    | 0.53 | 0.365906 | 0.905 |
| NRBF2    | 0.53 | 0.341655 | 0.904 |
| NUP160   | 0.53 | 0.456828 | 0.924 |
| OLFM4    | 0.53 | 0.365907 | 0.905 |
| OR4E2    | 0.53 | 0.341654 | 0.904 |
| OR6C2    | 0.53 | 0.341654 | 0.904 |
| PAFAH1B3 | 0.53 | 0.341654 | 0.904 |
| PDPN     | 0.53 | 0.341655 | 0.904 |
| POLDIP3  | 0.53 | 0.341654 | 0.904 |
| PPP1R14B | 0.53 | 0.341654 | 0.904 |
| PRICKLE2 | 0.53 | 0.341655 | 0.904 |
| PROKR1   | 0.53 | 0.365906 | 0.905 |
| PRSS33   | 0.53 | 0.365906 | 0.905 |
| RHOV     | 0.53 | 0.341654 | 0.904 |
| RLF      | 0.53 | 0.341655 | 0.904 |
| RNF128   | 0.53 | 0.341655 | 0.904 |
| RNF167   | 0.53 | 0.341654 | 0.904 |
| SCP2     | 0.53 | 0.341654 | 0.904 |
| SELO     | 0.53 | 0.365906 | 0.905 |
| SH3BGRL3 | 0.53 | 0.341654 | 0.904 |
| SLC25A33 | 0.53 | 0.341654 | 0.904 |
| SLCO6A1  | 0.53 | 0.341654 | 0.904 |
| SSBP3    | 0.53 | 0.341654 | 0.904 |
| STK32B   | 0.53 | 0.341654 | 0.904 |
| TAF6L    | 0.53 | 0.341654 | 0.904 |
| TAP2     | 0.53 | 0.341654 | 0.904 |
| THOP1    | 0.53 | 0.341655 | 0.904 |
| THSD4    | 0.53 | 0.365906 | 0.905 |
| TJP2     | 0.53 | 0.341654 | 0.904 |

|          |      |          |       |
|----------|------|----------|-------|
| TSPAN3   | 0.53 | 0.341654 | 0.904 |
| TTF2     | 0.53 | 0.341654 | 0.904 |
| UBL7     | 0.53 | 0.341654 | 0.904 |
| UBN2     | 0.53 | 0.341654 | 0.904 |
| USP26    | 0.53 | 0.341654 | 0.904 |
| USPL1    | 0.53 | 0.365907 | 0.905 |
| YIPF4    | 0.53 | 0.341655 | 0.904 |
| ZCCHC3   | 0.53 | 0.365906 | 0.905 |
| ZDHHC23  | 0.53 | 0.341654 | 0.904 |
| ZNF527   | 0.53 | 0.341654 | 0.904 |
| ZNHIT2   | 0.53 | 0.365906 | 0.905 |
| ACOT9    | 0.54 | 0.332839 | 0.901 |
| AHNAK2   | 0.54 | 0.357185 | 0.904 |
| AKAP1    | 0.54 | 0.357185 | 0.904 |
| ALPK2    | 0.54 | 0.332839 | 0.901 |
| APBB2    | 0.54 | 0.332839 | 0.901 |
| ATP5SL   | 0.54 | 0.332838 | 0.901 |
| BBX      | 0.54 | 0.332839 | 0.901 |
| BMPR1A   | 0.54 | 0.332838 | 0.901 |
| C16orf97 | 0.54 | 0.332838 | 0.901 |
| C4orf32  | 0.54 | 0.357185 | 0.904 |
| C9orf69  | 0.54 | 0.357185 | 0.904 |
| CABS1    | 0.54 | 0.332839 | 0.901 |
| CALR     | 0.54 | 0.332838 | 0.901 |
| CCDC178  | 0.54 | 0.332838 | 0.901 |
| CCL23    | 0.54 | 0.332839 | 0.901 |
| CD47     | 0.54 | 0.332838 | 0.901 |
| CEP72    | 0.54 | 0.357185 | 0.904 |
| CERS4    | 0.54 | 0.332839 | 0.901 |
| CHN1     | 0.54 | 0.332839 | 0.901 |
| COL11A1  | 0.54 | 0.332839 | 0.901 |
| COPZ1    | 0.54 | 0.332839 | 0.901 |
| CPEB3    | 0.54 | 0.357185 | 0.904 |
| CRMP1    | 0.54 | 0.357185 | 0.904 |
| CSH1     | 0.54 | 0.332838 | 0.901 |
| CTSK     | 0.54 | 0.357185 | 0.904 |
| CXorf21  | 0.54 | 0.357185 | 0.904 |
| CYTH3    | 0.54 | 0.332838 | 0.901 |
| DEPDC7   | 0.54 | 0.332839 | 0.901 |
| DHX37    | 0.54 | 0.414933 | 0.919 |
| ELMOD1   | 0.54 | 0.357186 | 0.904 |
| ESPL1    | 0.54 | 0.531254 | 0.939 |
| FANCD2OS | 0.54 | 0.332839 | 0.901 |
| FERMT3   | 0.54 | 0.332839 | 0.901 |
| FNDC7    | 0.54 | 0.332838 | 0.901 |
| GCA      | 0.54 | 0.332839 | 0.901 |
| GCNT4    | 0.54 | 0.332838 | 0.901 |

|           |      |          |       |
|-----------|------|----------|-------|
| GPATCH2L  | 0.54 | 0.332839 | 0.901 |
| HAPLN4    | 0.54 | 0.357186 | 0.904 |
| HIST1H3A  | 0.54 | 0.332838 | 0.901 |
| HNRNPD    | 0.54 | 0.332839 | 0.901 |
| HOMER     | 0.54 | 0.357186 | 0.904 |
| ISY1      | 0.54 | 0.414932 | 0.919 |
| KIAA1737  | 0.54 | 0.357185 | 0.904 |
| KIF1A     | 0.54 | 0.332838 | 0.901 |
| KLHL41    | 0.54 | 0.332838 | 0.901 |
| KRTAP16-1 | 0.54 | 0.332839 | 0.901 |
| LBR       | 0.54 | 0.332839 | 0.901 |
| LRRN1     | 0.54 | 0.332839 | 0.901 |
| MASTL     | 0.54 | 0.414932 | 0.919 |
| MC1R      | 0.54 | 0.332839 | 0.901 |
| MCF2L     | 0.54 | 0.332839 | 0.901 |
| MOXD1     | 0.54 | 0.357186 | 0.904 |
| MTG2      | 0.54 | 0.384683 | 0.908 |
| MTSS1L    | 0.54 | 0.332838 | 0.901 |
| MYO9A     | 0.54 | 0.332839 | 0.901 |
| NCKIPSD   | 0.54 | 0.332839 | 0.901 |
| NLRP1     | 0.54 | 0.332838 | 0.901 |
| OR6C74    | 0.54 | 0.332839 | 0.901 |
| PHPT1     | 0.54 | 0.332839 | 0.901 |
| PMFBP1    | 0.54 | 0.332839 | 0.901 |
| PSMB1     | 0.54 | 0.384683 | 0.908 |
| PWP2      | 0.54 | 0.357185 | 0.904 |
| PYURF     | 0.54 | 0.332839 | 0.901 |
| PYY       | 0.54 | 0.332838 | 0.901 |
| RARA      | 0.54 | 0.332839 | 0.901 |
| RCN3      | 0.54 | 0.332839 | 0.901 |
| RHOF      | 0.54 | 0.332839 | 0.901 |
| RRAGB     | 0.54 | 0.332839 | 0.901 |
| SAMD9L    | 0.54 | 0.332839 | 0.901 |
| SF3A3     | 0.54 | 0.414932 | 0.919 |
| SH3KBP1   | 0.54 | 0.357185 | 0.904 |
| SKA1      | 0.54 | 0.332839 | 0.901 |
| SLC12A4   | 0.54 | 0.357185 | 0.904 |
| SLC12A6   | 0.54 | 0.332839 | 0.901 |
| SLC3A1    | 0.54 | 0.332838 | 0.901 |
| SMIM14    | 0.54 | 0.332839 | 0.901 |
| SPATC1L   | 0.54 | 0.332839 | 0.901 |
| SPRR2B    | 0.54 | 0.332838 | 0.901 |
| SRSF11    | 0.54 | 0.332839 | 0.901 |
| STRIP2    | 0.54 | 0.332839 | 0.901 |
| SURF4     | 0.54 | 0.332838 | 0.901 |
| TAF2      | 0.54 | 0.384683 | 0.908 |
| TALDO1    | 0.54 | 0.332838 | 0.901 |

|          |      |          |       |
|----------|------|----------|-------|
| TBL1XR1  | 0.54 | 0.332838 | 0.901 |
| TCEAL8   | 0.54 | 0.332839 | 0.901 |
| TIAM1    | 0.54 | 0.332839 | 0.901 |
| TM4SF18  | 0.54 | 0.332839 | 0.901 |
| TSPAN16  | 0.54 | 0.332838 | 0.901 |
| UBE2D1   | 0.54 | 0.332838 | 0.901 |
| UCN3     | 0.54 | 0.332838 | 0.901 |
| VIT      | 0.54 | 0.332839 | 0.901 |
| WBSCR22  | 0.54 | 0.384683 | 0.908 |
| WDR88    | 0.54 | 0.332839 | 0.901 |
| ZNF300   | 0.54 | 0.332839 | 0.901 |
| ADD2     | 0.55 | 0.324172 | 0.9   |
| ALDH1A2  | 0.55 | 0.324172 | 0.9   |
| ATP5G2   | 0.55 | 0.324171 | 0.9   |
| BAX      | 0.55 | 0.324171 | 0.9   |
| C1orf227 | 0.55 | 0.324172 | 0.9   |
| C9orf106 | 0.55 | 0.348645 | 0.904 |
| CACNA2D3 | 0.55 | 0.324171 | 0.9   |
| CD40     | 0.55 | 0.324172 | 0.9   |
| CD79A    | 0.55 | 0.348645 | 0.904 |
| CDIP1    | 0.55 | 0.324171 | 0.9   |
| CDKN2D   | 0.55 | 0.324171 | 0.9   |
| CPVL     | 0.55 | 0.324171 | 0.9   |
| CRTC3    | 0.55 | 0.324171 | 0.9   |
| CXCL13   | 0.55 | 0.324171 | 0.9   |
| DCLRE1A  | 0.55 | 0.324172 | 0.9   |
| DCSTAMP  | 0.55 | 0.348645 | 0.904 |
| DDX27    | 0.55 | 0.376107 | 0.908 |
| DES11    | 0.55 | 0.348645 | 0.904 |
| DHH      | 0.55 | 0.324172 | 0.9   |
| DLL3     | 0.55 | 0.324171 | 0.9   |
| EGFR     | 0.55 | 0.324171 | 0.9   |
| EGR1     | 0.55 | 0.324171 | 0.9   |
| EHD4     | 0.55 | 0.324171 | 0.9   |
| GEMIN7   | 0.55 | 0.324171 | 0.9   |
| GIN1     | 0.55 | 0.324172 | 0.9   |
| GSTZ1    | 0.55 | 0.324172 | 0.9   |
| HCRTR1   | 0.55 | 0.324172 | 0.9   |
| HIST1H4B | 0.55 | 0.348645 | 0.904 |
| HOXD1    | 0.55 | 0.324171 | 0.9   |
| IGFBP1   | 0.55 | 0.324171 | 0.9   |
| INTS8    | 0.55 | 0.324171 | 0.9   |
| KCNC2    | 0.55 | 0.348645 | 0.904 |
| LCE2B    | 0.55 | 0.324171 | 0.9   |
| MPRIP    | 0.55 | 0.324171 | 0.9   |
| MRPS9    | 0.55 | 0.324171 | 0.9   |
| MTHFD2L  | 0.55 | 0.324171 | 0.9   |

|          |      |          |       |
|----------|------|----------|-------|
| MTSS1    | 0.55 | 0.324172 | 0.9   |
| MUSK     | 0.55 | 0.324172 | 0.9   |
| N4BP3    | 0.55 | 0.324172 | 0.9   |
| NDUFB9   | 0.55 | 0.324172 | 0.9   |
| NLRP5    | 0.55 | 0.324171 | 0.9   |
| NPY2R    | 0.55 | 0.324172 | 0.9   |
| OAZ2     | 0.55 | 0.324171 | 0.9   |
| OR6C68   | 0.55 | 0.324171 | 0.9   |
| PADI6    | 0.55 | 0.348646 | 0.904 |
| PAGE5    | 0.55 | 0.324171 | 0.9   |
| PGM1     | 0.55 | 0.324171 | 0.9   |
| PGS1     | 0.55 | 0.324171 | 0.9   |
| PLAUR    | 0.55 | 0.324171 | 0.9   |
| PLEKHH3  | 0.55 | 0.348646 | 0.904 |
| PSORS1C2 | 0.55 | 0.324172 | 0.9   |
| RPL34    | 0.55 | 0.440564 | 0.924 |
| RTN2     | 0.55 | 0.324172 | 0.9   |
| SCCPDH   | 0.55 | 0.324171 | 0.9   |
| SCRN3    | 0.55 | 0.324172 | 0.9   |
| SEC62    | 0.55 | 0.324172 | 0.9   |
| SENP7    | 0.55 | 0.324172 | 0.9   |
| SERTAD3  | 0.55 | 0.324171 | 0.9   |
| SETDB1   | 0.55 | 0.348645 | 0.904 |
| SIGLEC5  | 0.55 | 0.348646 | 0.904 |
| SLC46A3  | 0.55 | 0.324171 | 0.9   |
| SOX7     | 0.55 | 0.324171 | 0.9   |
| SPNS3    | 0.55 | 0.324171 | 0.9   |
| TGIF1    | 0.55 | 0.324171 | 0.9   |
| THAP7    | 0.55 | 0.324171 | 0.9   |
| TMEM147  | 0.55 | 0.324172 | 0.9   |
| TMEM219  | 0.55 | 0.348645 | 0.904 |
| TNIK     | 0.55 | 0.348645 | 0.904 |
| TULP3    | 0.55 | 0.324171 | 0.9   |
| UBASH3A  | 0.55 | 0.348646 | 0.904 |
| VPS8     | 0.55 | 0.324171 | 0.9   |
| VRTN     | 0.55 | 0.376107 | 0.908 |
| WASL     | 0.55 | 0.324171 | 0.9   |
| WDR37    | 0.55 | 0.324171 | 0.9   |
| WIPI2    | 0.55 | 0.324171 | 0.9   |
| ZNF140   | 0.55 | 0.348646 | 0.904 |
| ZNF28    | 0.55 | 0.324172 | 0.9   |
| ZNF395   | 0.55 | 0.348645 | 0.904 |
| ZNF609   | 0.55 | 0.324172 | 0.9   |
| ABCB11   | 0.56 | 0.315667 | 0.895 |
| ABLIM2   | 0.56 | 0.315668 | 0.895 |
| AGTPBP1  | 0.56 | 0.315667 | 0.895 |
| ANKRD34C | 0.56 | 0.315668 | 0.895 |

|           |      |          |       |
|-----------|------|----------|-------|
| APBB3     | 0.56 | 0.315668 | 0.895 |
| AQP2      | 0.56 | 0.315668 | 0.895 |
| ARMC12    | 0.56 | 0.315668 | 0.895 |
| BCL6B     | 0.56 | 0.315667 | 0.895 |
| BCO2      | 0.56 | 0.315668 | 0.895 |
| C10orf88  | 0.56 | 0.315668 | 0.895 |
| C9orf40   | 0.56 | 0.315668 | 0.895 |
| CAB39L    | 0.56 | 0.315668 | 0.895 |
| CAMK2D    | 0.56 | 0.315668 | 0.895 |
| CCDC61    | 0.56 | 0.34017  | 0.904 |
| CEACAM18  | 0.56 | 0.471766 | 0.928 |
| CKMT1B    | 0.56 | 0.34017  | 0.904 |
| CLEC4G    | 0.56 | 0.315668 | 0.895 |
| CNPY1     | 0.56 | 0.315668 | 0.895 |
| FARP2     | 0.56 | 0.315668 | 0.895 |
| GABRG2    | 0.56 | 0.315668 | 0.895 |
| GLT1D1    | 0.56 | 0.315667 | 0.895 |
| GNPDA1    | 0.56 | 0.315668 | 0.895 |
| GNRH2     | 0.56 | 0.315667 | 0.895 |
| GPR173    | 0.56 | 0.315667 | 0.895 |
| GPR85     | 0.56 | 0.315668 | 0.895 |
| HLA-DMA   | 0.56 | 0.34017  | 0.904 |
| HMX1      | 0.56 | 0.34017  | 0.904 |
| HPS3      | 0.56 | 0.315668 | 0.895 |
| HSD3B7    | 0.56 | 0.315668 | 0.895 |
| KIAA1239  | 0.56 | 0.315668 | 0.895 |
| KIF2B     | 0.56 | 0.315668 | 0.895 |
| KLF14     | 0.56 | 0.34017  | 0.904 |
| KRTAP19-5 | 0.56 | 0.315668 | 0.895 |
| LDOC1     | 0.56 | 0.34017  | 0.904 |
| LGI1      | 0.56 | 0.315668 | 0.895 |
| LIAS      | 0.56 | 0.315668 | 0.895 |
| LRRC37B   | 0.56 | 0.315667 | 0.895 |
| LTV1      | 0.56 | 0.315668 | 0.895 |
| LYPD2     | 0.56 | 0.315668 | 0.895 |
| MAGI3     | 0.56 | 0.315668 | 0.895 |
| MICA      | 0.56 | 0.315668 | 0.895 |
| MICALL2   | 0.56 | 0.315668 | 0.895 |
| MYL6B     | 0.56 | 0.315668 | 0.895 |
| NCF2      | 0.56 | 0.315668 | 0.895 |
| NRG3      | 0.56 | 0.315668 | 0.895 |
| NSUN5     | 0.56 | 0.34017  | 0.904 |
| OR2AK2    | 0.56 | 0.315668 | 0.895 |
| OR2L13    | 0.56 | 0.315668 | 0.895 |
| OTC       | 0.56 | 0.315667 | 0.895 |
| PARP14    | 0.56 | 0.315668 | 0.895 |
| PPM1H     | 0.56 | 0.315668 | 0.895 |

|          |      |          |       |
|----------|------|----------|-------|
| PPP1R35  | 0.56 | 0.34017  | 0.904 |
| PRCD     | 0.56 | 0.315668 | 0.895 |
| PSCA     | 0.56 | 0.315668 | 0.895 |
| PTRF     | 0.56 | 0.315668 | 0.895 |
| RAB40AL  | 0.56 | 0.315667 | 0.895 |
| RGS13    | 0.56 | 0.315668 | 0.895 |
| RMND1    | 0.56 | 0.315668 | 0.895 |
| SERPINA5 | 0.56 | 0.34017  | 0.904 |
| SIRT2    | 0.56 | 0.315668 | 0.895 |
| SLC30A9  | 0.56 | 0.315668 | 0.895 |
| SLC35G3  | 0.56 | 0.315668 | 0.895 |
| SLC35G6  | 0.56 | 0.34017  | 0.904 |
| SLC39A4  | 0.56 | 0.315668 | 0.895 |
| SLU7     | 0.56 | 0.367727 | 0.905 |
| SPOCK3   | 0.56 | 0.315667 | 0.895 |
| STX11    | 0.56 | 0.315668 | 0.895 |
| TGFBR1   | 0.56 | 0.315668 | 0.895 |
| TMEM173  | 0.56 | 0.315668 | 0.895 |
| TMEM215  | 0.56 | 0.315668 | 0.895 |
| TRAFD1   | 0.56 | 0.315668 | 0.895 |
| TST      | 0.56 | 0.34017  | 0.904 |
| XPO7     | 0.56 | 0.315668 | 0.895 |
| ZMPSTE24 | 0.56 | 0.315668 | 0.895 |
| ZNF347   | 0.56 | 0.315668 | 0.895 |
| ABCA6    | 0.57 | 0.307298 | 0.891 |
| ADCK3    | 0.57 | 0.331924 | 0.901 |
| AKAP6    | 0.57 | 0.331924 | 0.901 |
| AKR1C1   | 0.57 | 0.35947  | 0.904 |
| ANKRD18A | 0.57 | 0.307297 | 0.891 |
| APH1A    | 0.57 | 0.331924 | 0.901 |
| APLP1    | 0.57 | 0.331924 | 0.901 |
| ATE1     | 0.57 | 0.307297 | 0.891 |
| BSX      | 0.57 | 0.331925 | 0.901 |
| CD8B     | 0.57 | 0.307297 | 0.891 |
| CEP164   | 0.57 | 0.331924 | 0.901 |
| CHST1    | 0.57 | 0.307297 | 0.891 |
| CITED4   | 0.57 | 0.307297 | 0.891 |
| CLPS     | 0.57 | 0.307297 | 0.891 |
| CNTNAP5  | 0.57 | 0.307297 | 0.891 |
| CTGF     | 0.57 | 0.331924 | 0.901 |
| DHFR     | 0.57 | 0.307298 | 0.891 |
| DLX1     | 0.57 | 0.307297 | 0.891 |
| DOCK1    | 0.57 | 0.307298 | 0.891 |
| EHMT2    | 0.57 | 0.331924 | 0.901 |
| ELOVL6   | 0.57 | 0.307297 | 0.891 |
| ERH      | 0.57 | 0.307297 | 0.891 |
| ERN2     | 0.57 | 0.307297 | 0.891 |

|         |      |          |       |
|---------|------|----------|-------|
| ESYT3   | 0.57 | 0.307297 | 0.891 |
| EXO5    | 0.57 | 0.307297 | 0.891 |
| FABP5   | 0.57 | 0.509328 | 0.933 |
| FAM96A  | 0.57 | 0.307297 | 0.891 |
| FANCD2  | 0.57 | 0.307297 | 0.891 |
| FLOT1   | 0.57 | 0.307297 | 0.891 |
| GATA4   | 0.57 | 0.307297 | 0.891 |
| GBA     | 0.57 | 0.331924 | 0.901 |
| GCHFR   | 0.57 | 0.307297 | 0.891 |
| GTPBP6  | 0.57 | 0.307297 | 0.891 |
| H1FOO   | 0.57 | 0.307297 | 0.891 |
| HFE     | 0.57 | 0.307297 | 0.891 |
| HIC1    | 0.57 | 0.307297 | 0.891 |
| HIRA    | 0.57 | 0.35947  | 0.904 |
| IFNA21  | 0.57 | 0.307298 | 0.891 |
| IGFL4   | 0.57 | 0.307297 | 0.891 |
| IL23R   | 0.57 | 0.307297 | 0.891 |
| LAP3    | 0.57 | 0.307297 | 0.891 |
| MAPK6   | 0.57 | 0.307297 | 0.891 |
| MED25   | 0.57 | 0.35947  | 0.904 |
| MMP27   | 0.57 | 0.307297 | 0.891 |
| MOG     | 0.57 | 0.331924 | 0.901 |
| MRPS27  | 0.57 | 0.331924 | 0.901 |
| N4BP2   | 0.57 | 0.307297 | 0.891 |
| NBPF15  | 0.57 | 0.307297 | 0.891 |
| NDC1    | 0.57 | 0.307297 | 0.891 |
| NLRP10  | 0.57 | 0.307297 | 0.891 |
| NRP1    | 0.57 | 0.307297 | 0.891 |
| NSDHL   | 0.57 | 0.307297 | 0.891 |
| OR6P1   | 0.57 | 0.307297 | 0.891 |
| PCDH20  | 0.57 | 0.307297 | 0.891 |
| PDGFRL  | 0.57 | 0.307297 | 0.891 |
| PFN3    | 0.57 | 0.307297 | 0.891 |
| PLAGL1  | 0.57 | 0.331925 | 0.901 |
| PLEKHO2 | 0.57 | 0.307298 | 0.891 |
| POLM    | 0.57 | 0.331924 | 0.901 |
| PREPL   | 0.57 | 0.307297 | 0.891 |
| RAD23B  | 0.57 | 0.331924 | 0.901 |
| RILP    | 0.57 | 0.331925 | 0.901 |
| SGCG    | 0.57 | 0.307298 | 0.891 |
| SLC36A4 | 0.57 | 0.331925 | 0.901 |
| SMDT1   | 0.57 | 0.307298 | 0.891 |
| SOHLH2  | 0.57 | 0.307297 | 0.891 |
| SPAG17  | 0.57 | 0.307297 | 0.891 |
| SRRM2   | 0.57 | 0.35947  | 0.904 |
| ST14    | 0.57 | 0.307297 | 0.891 |
| SUFU    | 0.57 | 0.307297 | 0.891 |

|           |      |          |       |
|-----------|------|----------|-------|
| TBC1D25   | 0.57 | 0.331924 | 0.901 |
| TLR1      | 0.57 | 0.307297 | 0.891 |
| TNFSF14   | 0.57 | 0.307297 | 0.891 |
| UBASH3B   | 0.57 | 0.307297 | 0.891 |
| UBE2R2    | 0.57 | 0.307297 | 0.891 |
| UGT1A5    | 0.57 | 0.307297 | 0.891 |
| ULBP1     | 0.57 | 0.307297 | 0.891 |
| VNN1      | 0.57 | 0.307297 | 0.891 |
| WDR81     | 0.57 | 0.307297 | 0.891 |
| WDR87     | 0.57 | 0.307297 | 0.891 |
| ZBTB16    | 0.57 | 0.307297 | 0.891 |
| ZC3H3     | 0.57 | 0.307297 | 0.891 |
| ZDHHC13   | 0.57 | 0.307298 | 0.891 |
| ZFP41     | 0.57 | 0.307297 | 0.891 |
| ZNF99     | 0.57 | 0.307297 | 0.891 |
| AIMP2     | 0.58 | 0.299105 | 0.886 |
| C12orf73  | 0.58 | 0.299106 | 0.886 |
| C16orf46  | 0.58 | 0.323807 | 0.9   |
| C1orf185  | 0.58 | 0.299105 | 0.886 |
| C5orf30   | 0.58 | 0.299105 | 0.886 |
| CABIN1    | 0.58 | 0.323807 | 0.9   |
| CABLES1   | 0.58 | 0.323807 | 0.9   |
| CLPX      | 0.58 | 0.299105 | 0.886 |
| COPE      | 0.58 | 0.456575 | 0.924 |
| CTRB1     | 0.58 | 0.299106 | 0.886 |
| DCAF7     | 0.58 | 0.323807 | 0.9   |
| DHX9      | 0.58 | 0.299105 | 0.886 |
| DIRC1     | 0.58 | 0.299105 | 0.886 |
| EOMES     | 0.58 | 0.299106 | 0.886 |
| EXOSC10   | 0.58 | 0.299105 | 0.886 |
| FBN2      | 0.58 | 0.299106 | 0.886 |
| FBXL13    | 0.58 | 0.299105 | 0.886 |
| FBXO22    | 0.58 | 0.299105 | 0.886 |
| FIBCD1    | 0.58 | 0.299105 | 0.886 |
| FKBP14    | 0.58 | 0.299106 | 0.886 |
| GANC      | 0.58 | 0.323807 | 0.9   |
| GFRA4     | 0.58 | 0.299105 | 0.886 |
| GOLIM4    | 0.58 | 0.299105 | 0.886 |
| GPR160    | 0.58 | 0.299106 | 0.886 |
| GRHL2     | 0.58 | 0.299105 | 0.886 |
| HIST1H2BC | 0.58 | 0.299105 | 0.886 |
| ITGA2     | 0.58 | 0.299105 | 0.886 |
| KHDC1     | 0.58 | 0.299105 | 0.886 |
| KIF6      | 0.58 | 0.299106 | 0.886 |
| LIX1L     | 0.58 | 0.299106 | 0.886 |
| MAPK15    | 0.58 | 0.299105 | 0.886 |
| MCOLN3    | 0.58 | 0.299105 | 0.886 |

|          |      |          |       |
|----------|------|----------|-------|
| MVB12B   | 0.58 | 0.299106 | 0.886 |
| MYCT1    | 0.58 | 0.299105 | 0.886 |
| NRXN3    | 0.58 | 0.299105 | 0.886 |
| OR5K3    | 0.58 | 0.323807 | 0.9   |
| PAPOLB   | 0.58 | 0.299105 | 0.886 |
| PCDH10   | 0.58 | 0.323807 | 0.9   |
| PCDHA10  | 0.58 | 0.299105 | 0.886 |
| PCGF2    | 0.58 | 0.299106 | 0.886 |
| PHF11    | 0.58 | 0.299106 | 0.886 |
| PIK3CD   | 0.58 | 0.299105 | 0.886 |
| PLAU     | 0.58 | 0.299105 | 0.886 |
| PTRH1    | 0.58 | 0.299105 | 0.886 |
| RNFT2    | 0.58 | 0.299105 | 0.886 |
| RPS5     | 0.58 | 0.323807 | 0.9   |
| SAT2     | 0.58 | 0.299105 | 0.886 |
| SCAMP4   | 0.58 | 0.299105 | 0.886 |
| SH3PXD2A | 0.58 | 0.299105 | 0.886 |
| SIAH1    | 0.58 | 0.299105 | 0.886 |
| SLC17A5  | 0.58 | 0.299106 | 0.886 |
| SLC2A2   | 0.58 | 0.299105 | 0.886 |
| SPICE1   | 0.58 | 0.299106 | 0.886 |
| SPRR2A   | 0.58 | 0.299105 | 0.886 |
| SVOPL    | 0.58 | 0.299105 | 0.886 |
| TAS2R16  | 0.58 | 0.299106 | 0.886 |
| TCTEX1D2 | 0.58 | 0.299105 | 0.886 |
| TMEFF2   | 0.58 | 0.299105 | 0.886 |
| TOMM20L  | 0.58 | 0.323807 | 0.9   |
| TRIM16   | 0.58 | 0.299105 | 0.886 |
| TRIM31   | 0.58 | 0.299105 | 0.886 |
| TRIM5    | 0.58 | 0.299105 | 0.886 |
| UBE2L6   | 0.58 | 0.299106 | 0.886 |
| VEPH1    | 0.58 | 0.299106 | 0.886 |
| VPS28    | 0.58 | 0.351375 | 0.904 |
| WFDC10A  | 0.58 | 0.299106 | 0.886 |
| ZC3H7A   | 0.58 | 0.299105 | 0.886 |
| ZFP90    | 0.58 | 0.299106 | 0.886 |
| ZNF106   | 0.58 | 0.299106 | 0.886 |
| ZNF208   | 0.58 | 0.299106 | 0.886 |
| ZNF717   | 0.58 | 0.299105 | 0.886 |
| ACAP3    | 0.59 | 0.291109 | 0.884 |
| ANKRD11  | 0.59 | 0.291109 | 0.884 |
| ARL17B   | 0.59 | 0.291109 | 0.884 |
| ARL6IP5  | 0.59 | 0.291109 | 0.884 |
| ASTL     | 0.59 | 0.291109 | 0.884 |
| ATAD1    | 0.59 | 0.291109 | 0.884 |
| BLK      | 0.59 | 0.291109 | 0.884 |
| C10orf32 | 0.59 | 0.291109 | 0.884 |

|           |      |          |       |
|-----------|------|----------|-------|
| C17orf100 | 0.59 | 0.343348 | 0.904 |
| C1orf52   | 0.59 | 0.291109 | 0.884 |
| C2CD3     | 0.59 | 0.291109 | 0.884 |
| C6orf183  | 0.59 | 0.291109 | 0.884 |
| C8orf22   | 0.59 | 0.291109 | 0.884 |
| CAPN5     | 0.59 | 0.291109 | 0.884 |
| CCDC88A   | 0.59 | 0.291109 | 0.884 |
| CCL16     | 0.59 | 0.315792 | 0.895 |
| CKMT1A    | 0.59 | 0.291109 | 0.884 |
| CLCN2     | 0.59 | 0.291109 | 0.884 |
| CLDN25    | 0.59 | 0.291109 | 0.884 |
| CNTNAP4   | 0.59 | 0.291109 | 0.884 |
| COL22A1   | 0.59 | 0.291109 | 0.884 |
| CTNNA3    | 0.59 | 0.291109 | 0.884 |
| DIMT1     | 0.59 | 0.343347 | 0.904 |
| DLL4      | 0.59 | 0.291109 | 0.884 |
| DND1      | 0.59 | 0.291109 | 0.884 |
| DOCK6     | 0.59 | 0.315792 | 0.895 |
| DOK3      | 0.59 | 0.291109 | 0.884 |
| FAM3C     | 0.59 | 0.291109 | 0.884 |
| FRAT2     | 0.59 | 0.291109 | 0.884 |
| FSHR      | 0.59 | 0.291109 | 0.884 |
| GIP       | 0.59 | 0.291109 | 0.884 |
| GLYATL1   | 0.59 | 0.291109 | 0.884 |
| GNG7      | 0.59 | 0.291109 | 0.884 |
| GPX2      | 0.59 | 0.291109 | 0.884 |
| GSDMA     | 0.59 | 0.291109 | 0.884 |
| GYLTL1B   | 0.59 | 0.291109 | 0.884 |
| HSD17B11  | 0.59 | 0.291109 | 0.884 |
| IKBKAP    | 0.59 | 0.315793 | 0.895 |
| KCNJ9     | 0.59 | 0.291109 | 0.884 |
| KCTD7     | 0.59 | 0.291109 | 0.884 |
| KLC1      | 0.59 | 0.291109 | 0.884 |
| MEPCE     | 0.59 | 0.374028 | 0.908 |
| NDST2     | 0.59 | 0.315792 | 0.895 |
| NDUFB11   | 0.59 | 0.315792 | 0.895 |
| NEDD4L    | 0.59 | 0.291109 | 0.884 |
| NOMO2     | 0.59 | 0.291109 | 0.884 |
| NUDT14    | 0.59 | 0.291109 | 0.884 |
| P2RY8     | 0.59 | 0.291109 | 0.884 |
| PDK4      | 0.59 | 0.291109 | 0.884 |
| PIGF      | 0.59 | 0.291109 | 0.884 |
| PRM3      | 0.59 | 0.343347 | 0.904 |
| PTPRF     | 0.59 | 0.291109 | 0.884 |
| RARB      | 0.59 | 0.291109 | 0.884 |
| RASGRF1   | 0.59 | 0.291109 | 0.884 |
| RFFL      | 0.59 | 0.315792 | 0.895 |

|           |      |          |       |
|-----------|------|----------|-------|
| RGS21     | 0.59 | 0.291109 | 0.884 |
| RPL11     | 0.59 | 0.40898  | 0.919 |
| RPS6KB1   | 0.59 | 0.291109 | 0.884 |
| SAMHD1    | 0.59 | 0.291109 | 0.884 |
| SLC17A6   | 0.59 | 0.291109 | 0.884 |
| SLC25A25  | 0.59 | 0.291109 | 0.884 |
| STOM      | 0.59 | 0.291109 | 0.884 |
| TFPI2     | 0.59 | 0.291109 | 0.884 |
| TMEM106B  | 0.59 | 0.291109 | 0.884 |
| TMEM145   | 0.59 | 0.315792 | 0.895 |
| TMEM65    | 0.59 | 0.291109 | 0.884 |
| TRIM77    | 0.59 | 0.291109 | 0.884 |
| VBP1      | 0.59 | 0.291109 | 0.884 |
| VENTX     | 0.59 | 0.291109 | 0.884 |
| YIPF7     | 0.59 | 0.291109 | 0.884 |
| ZNF248    | 0.59 | 0.291109 | 0.884 |
| ANKRD20A4 | 0.6  | 0.283208 | 0.88  |
| ANXA3     | 0.6  | 0.283207 | 0.88  |
| APH1B     | 0.6  | 0.283207 | 0.88  |
| ASF1A     | 0.6  | 0.283207 | 0.88  |
| C1QTNF5   | 0.6  | 0.30792  | 0.891 |
| C5orf55   | 0.6  | 0.283207 | 0.88  |
| CCDC152   | 0.6  | 0.283208 | 0.88  |
| CCL13     | 0.6  | 0.283207 | 0.88  |
| CCNB1     | 0.6  | 0.283207 | 0.88  |
| CD1C      | 0.6  | 0.283208 | 0.88  |
| CDC20B    | 0.6  | 0.283207 | 0.88  |
| CEP120    | 0.6  | 0.283208 | 0.88  |
| CEP19     | 0.6  | 0.283208 | 0.88  |
| CHPT1     | 0.6  | 0.30792  | 0.891 |
| CHST11    | 0.6  | 0.283208 | 0.88  |
| CSRNP1    | 0.6  | 0.335387 | 0.904 |
| DDI2      | 0.6  | 0.283208 | 0.88  |
| DDX3X     | 0.6  | 0.283207 | 0.88  |
| DUOX2     | 0.6  | 0.283208 | 0.88  |
| DUSP9     | 0.6  | 0.283207 | 0.88  |
| FAAH2     | 0.6  | 0.283207 | 0.88  |
| FAM209A   | 0.6  | 0.283207 | 0.88  |
| GRB14     | 0.6  | 0.283207 | 0.88  |
| GTF2B     | 0.6  | 0.335387 | 0.904 |
| HIST2H2BF | 0.6  | 0.283207 | 0.88  |
| ILDR2     | 0.6  | 0.283208 | 0.88  |
| INTS2     | 0.6  | 0.335386 | 0.904 |
| IRGQ      | 0.6  | 0.283207 | 0.88  |
| KRT16     | 0.6  | 0.283208 | 0.88  |
| KRT81     | 0.6  | 0.283208 | 0.88  |
| LPHN3     | 0.6  | 0.283208 | 0.88  |

|          |      |          |       |
|----------|------|----------|-------|
| LPPR3    | 0.6  | 0.283207 | 0.88  |
| MATK     | 0.6  | 0.283208 | 0.88  |
| MOK      | 0.6  | 0.307919 | 0.891 |
| MORC1    | 0.6  | 0.283207 | 0.88  |
| MRPL20   | 0.6  | 0.366235 | 0.905 |
| MYH3     | 0.6  | 0.335387 | 0.904 |
| NCAN     | 0.6  | 0.283208 | 0.88  |
| NEGR1    | 0.6  | 0.283207 | 0.88  |
| NEK5     | 0.6  | 0.283207 | 0.88  |
| NOL11    | 0.6  | 0.30792  | 0.891 |
| NUTM2F   | 0.6  | 0.283208 | 0.88  |
| OR4Q3    | 0.6  | 0.283207 | 0.88  |
| PCDH18   | 0.6  | 0.283207 | 0.88  |
| PITPNA   | 0.6  | 0.283208 | 0.88  |
| PIWIL2   | 0.6  | 0.283208 | 0.88  |
| POLR3GL  | 0.6  | 0.283208 | 0.88  |
| PPM1F    | 0.6  | 0.283208 | 0.88  |
| PRR23C   | 0.6  | 0.283208 | 0.88  |
| PSG4     | 0.6  | 0.283207 | 0.88  |
| RAG1     | 0.6  | 0.283207 | 0.88  |
| RARS2    | 0.6  | 0.283208 | 0.88  |
| RNF213   | 0.6  | 0.283207 | 0.88  |
| RNF6     | 0.6  | 0.283207 | 0.88  |
| RPS3A    | 0.6  | 0.283207 | 0.88  |
| SH3D19   | 0.6  | 0.283207 | 0.88  |
| SLC35B1  | 0.6  | 0.307919 | 0.891 |
| SLURP1   | 0.6  | 0.283208 | 0.88  |
| STAB1    | 0.6  | 0.283208 | 0.88  |
| STOML3   | 0.6  | 0.283207 | 0.88  |
| TCP10    | 0.6  | 0.283208 | 0.88  |
| TCP11L1  | 0.6  | 0.283207 | 0.88  |
| TEFM     | 0.6  | 0.283208 | 0.88  |
| TMC8     | 0.6  | 0.283208 | 0.88  |
| TRAPPC9  | 0.6  | 0.283207 | 0.88  |
| TULP4    | 0.6  | 0.283208 | 0.88  |
| UPB1     | 0.6  | 0.283208 | 0.88  |
| UPK1A    | 0.6  | 0.283207 | 0.88  |
| WTH3DI   | 0.6  | 0.283207 | 0.88  |
| ZNF277   | 0.6  | 0.283207 | 0.88  |
| ZSWIM3   | 0.6  | 0.283207 | 0.88  |
| ACY3     | 0.61 | 0.275417 | 0.878 |
| AGAP1    | 0.61 | 0.275417 | 0.878 |
| AOC3     | 0.61 | 0.275417 | 0.878 |
| ATP6V0A1 | 0.61 | 0.275418 | 0.878 |
| C20orf96 | 0.61 | 0.275417 | 0.878 |
| CCL27    | 0.61 | 0.275417 | 0.878 |
| CLASP1   | 0.61 | 0.275417 | 0.878 |

|          |      |          |       |
|----------|------|----------|-------|
| CLEC4C   | 0.61 | 0.275417 | 0.878 |
| CYB561D1 | 0.61 | 0.275417 | 0.878 |
| CYP3A4   | 0.61 | 0.275417 | 0.878 |
| DDX51    | 0.61 | 0.327637 | 0.901 |
| DGKE     | 0.61 | 0.275417 | 0.878 |
| DUS4L    | 0.61 | 0.300139 | 0.887 |
| F8       | 0.61 | 0.275418 | 0.878 |
| FAM24B   | 0.61 | 0.275417 | 0.878 |
| FMNL2    | 0.61 | 0.358477 | 0.904 |
| HOXD3    | 0.61 | 0.275417 | 0.878 |
| IMPAD1   | 0.61 | 0.275417 | 0.878 |
| KCTD13   | 0.61 | 0.275417 | 0.878 |
| KRT75    | 0.61 | 0.275417 | 0.878 |
| LARP4    | 0.61 | 0.275417 | 0.878 |
| LEPROTL1 | 0.61 | 0.275418 | 0.878 |
| LEUTX    | 0.61 | 0.358476 | 0.904 |
| LMO3     | 0.61 | 0.275418 | 0.878 |
| MAEL     | 0.61 | 0.275417 | 0.878 |
| MAP3K2   | 0.61 | 0.275418 | 0.878 |
| MARCH10  | 0.61 | 0.275417 | 0.878 |
| MDFIC    | 0.61 | 0.275418 | 0.878 |
| MTX2     | 0.61 | 0.275417 | 0.878 |
| NADK2    | 0.61 | 0.275417 | 0.878 |
| NDRG3    | 0.61 | 0.275417 | 0.878 |
| OR13C9   | 0.61 | 0.275417 | 0.878 |
| PAM      | 0.61 | 0.275417 | 0.878 |
| PARP8    | 0.61 | 0.300138 | 0.887 |
| PHYHIP   | 0.61 | 0.275417 | 0.878 |
| PSMD1    | 0.61 | 0.300139 | 0.887 |
| RASD1    | 0.61 | 0.275418 | 0.878 |
| RND3     | 0.61 | 0.275417 | 0.878 |
| RRNAD1   | 0.61 | 0.275417 | 0.878 |
| SH2D3A   | 0.61 | 0.275417 | 0.878 |
| SIRPD    | 0.61 | 0.300139 | 0.887 |
| SLC16A10 | 0.61 | 0.275417 | 0.878 |
| SLC34A3  | 0.61 | 0.275418 | 0.878 |
| SLC44A4  | 0.61 | 0.275417 | 0.878 |
| SMPD2    | 0.61 | 0.275417 | 0.878 |
| SNRNP70  | 0.61 | 0.300139 | 0.887 |
| SPATA3   | 0.61 | 0.275417 | 0.878 |
| STAM     | 0.61 | 0.275417 | 0.878 |
| STAT3    | 0.61 | 0.275417 | 0.878 |
| TLR10    | 0.61 | 0.275417 | 0.878 |
| TMEM150A | 0.61 | 0.300139 | 0.887 |
| TPH2     | 0.61 | 0.300139 | 0.887 |
| TRAPPC6B | 0.61 | 0.327637 | 0.901 |
| TRIM15   | 0.61 | 0.275417 | 0.878 |

|           |      |          |       |
|-----------|------|----------|-------|
| TRIM58    | 0.61 | 0.275417 | 0.878 |
| TSSK2     | 0.61 | 0.275418 | 0.878 |
| ZBED2     | 0.61 | 0.327637 | 0.901 |
| ABHD14B   | 0.62 | 0.267859 | 0.873 |
| AMER2     | 0.62 | 0.267858 | 0.873 |
| ANKRD32   | 0.62 | 0.267858 | 0.873 |
| ARL13B    | 0.62 | 0.267858 | 0.873 |
| ATP13A2   | 0.62 | 0.267859 | 0.873 |
| ATRIP     | 0.62 | 0.267858 | 0.873 |
| BPI       | 0.62 | 0.292507 | 0.884 |
| C12orf52  | 0.62 | 0.267858 | 0.873 |
| C19orf45  | 0.62 | 0.267859 | 0.873 |
| C1D       | 0.62 | 0.292507 | 0.884 |
| C4orf26   | 0.62 | 0.267858 | 0.873 |
| CACNG3    | 0.62 | 0.292507 | 0.884 |
| CCDC142   | 0.62 | 0.320043 | 0.9   |
| CCDC71    | 0.62 | 0.267859 | 0.873 |
| CD72      | 0.62 | 0.267858 | 0.873 |
| CDH3      | 0.62 | 0.292508 | 0.884 |
| CTLA4     | 0.62 | 0.267859 | 0.873 |
| DACH1     | 0.62 | 0.292507 | 0.884 |
| DNAJC11   | 0.62 | 0.320042 | 0.9   |
| FAM149A   | 0.62 | 0.267859 | 0.873 |
| FAM20A    | 0.62 | 0.292507 | 0.884 |
| FAM49B    | 0.62 | 0.267858 | 0.873 |
| GABRA3    | 0.62 | 0.267859 | 0.873 |
| GJA4      | 0.62 | 0.292507 | 0.884 |
| GLS2      | 0.62 | 0.267858 | 0.873 |
| GOLGA6D   | 0.62 | 0.292507 | 0.884 |
| GPR78     | 0.62 | 0.267859 | 0.873 |
| GTF2H2C_2 | 0.62 | 0.267859 | 0.873 |
| HAPLN3    | 0.62 | 0.267858 | 0.873 |
| HRG       | 0.62 | 0.267859 | 0.873 |
| INO80B    | 0.62 | 0.292507 | 0.884 |
| KCNJ16    | 0.62 | 0.267858 | 0.873 |
| KIAA0319  | 0.62 | 0.267858 | 0.873 |
| KLHL6     | 0.62 | 0.267859 | 0.873 |
| LAYN      | 0.62 | 0.267858 | 0.873 |
| LIN28A    | 0.62 | 0.267859 | 0.873 |
| LMBR1     | 0.62 | 0.267859 | 0.873 |
| MBP       | 0.62 | 0.267859 | 0.873 |
| MEA1      | 0.62 | 0.267859 | 0.873 |
| MIEN1     | 0.62 | 0.267859 | 0.873 |
| MRPL9     | 0.62 | 0.267859 | 0.873 |
| NABP2     | 0.62 | 0.267859 | 0.873 |
| NDUFA1    | 0.62 | 0.267858 | 0.873 |
| NIP7      | 0.62 | 0.267858 | 0.873 |

|         |      |          |       |
|---------|------|----------|-------|
| NPC1    | 0.62 | 0.267859 | 0.873 |
| NPY5R   | 0.62 | 0.267859 | 0.873 |
| NUDT1   | 0.62 | 0.267859 | 0.873 |
| NUP54   | 0.62 | 0.267858 | 0.873 |
| OR51V1  | 0.62 | 0.267859 | 0.873 |
| PLEKHA4 | 0.62 | 0.292507 | 0.884 |
| PNLIP   | 0.62 | 0.267859 | 0.873 |
| RBM10   | 0.62 | 0.267859 | 0.873 |
| S100P   | 0.62 | 0.267858 | 0.873 |
| SLAMF7  | 0.62 | 0.267859 | 0.873 |
| SLC45A4 | 0.62 | 0.267858 | 0.873 |
| SLC9A1  | 0.62 | 0.267859 | 0.873 |
| SMIM22  | 0.62 | 0.292507 | 0.884 |
| SNX5    | 0.62 | 0.292508 | 0.884 |
| STMND1  | 0.62 | 0.267859 | 0.873 |
| SYNE4   | 0.62 | 0.292507 | 0.884 |
| TCTN2   | 0.62 | 0.267858 | 0.873 |
| TOR3A   | 0.62 | 0.267858 | 0.873 |
| TRIL    | 0.62 | 0.267858 | 0.873 |
| TSHB    | 0.62 | 0.267859 | 0.873 |
| TTC32   | 0.62 | 0.267859 | 0.873 |
| UBALD1  | 0.62 | 0.267858 | 0.873 |
| XPO6    | 0.62 | 0.267859 | 0.873 |
| ZAK     | 0.62 | 0.267858 | 0.873 |
| ZFYVE1  | 0.62 | 0.292507 | 0.884 |
| ZNF641  | 0.62 | 0.292508 | 0.884 |
| ADAM12  | 0.63 | 0.260413 | 0.87  |
| ADAMTS4 | 0.63 | 0.260413 | 0.87  |
| C1QTNF8 | 0.63 | 0.260413 | 0.87  |
| C2orf57 | 0.63 | 0.260413 | 0.87  |
| CAMK4   | 0.63 | 0.260413 | 0.87  |
| CAPN14  | 0.63 | 0.260413 | 0.87  |
| CASP8   | 0.63 | 0.260413 | 0.87  |
| CCL3L1  | 0.63 | 0.260412 | 0.87  |
| CKMT2   | 0.63 | 0.260413 | 0.87  |
| CNGA1   | 0.63 | 0.260413 | 0.87  |
| COX6A1  | 0.63 | 0.260413 | 0.87  |
| CSTL1   | 0.63 | 0.260413 | 0.87  |
| CUL9    | 0.63 | 0.260413 | 0.87  |
| DHX58   | 0.63 | 0.260413 | 0.87  |
| DIRAS1  | 0.63 | 0.260413 | 0.87  |
| DMAP1   | 0.63 | 0.2851   | 0.884 |
| EFCAB13 | 0.63 | 0.260412 | 0.87  |
| EGLN1   | 0.63 | 0.260413 | 0.87  |
| EML2    | 0.63 | 0.285099 | 0.884 |
| ENKUR   | 0.63 | 0.260412 | 0.87  |
| ETS1    | 0.63 | 0.260413 | 0.87  |

|           |      |          |       |
|-----------|------|----------|-------|
| FMN2      | 0.63 | 0.285099 | 0.884 |
| GJA8      | 0.63 | 0.260413 | 0.87  |
| GLYATL2   | 0.63 | 0.260413 | 0.87  |
| GPR35     | 0.63 | 0.260413 | 0.87  |
| HK2       | 0.63 | 0.312477 | 0.895 |
| HLA-DRA   | 0.63 | 0.260413 | 0.87  |
| HOXC9     | 0.63 | 0.2851   | 0.884 |
| IAPP      | 0.63 | 0.260413 | 0.87  |
| IGIP      | 0.63 | 0.260413 | 0.87  |
| IL1A      | 0.63 | 0.260413 | 0.87  |
| KRT5      | 0.63 | 0.260412 | 0.87  |
| LAMC2     | 0.63 | 0.260413 | 0.87  |
| MARCH7    | 0.63 | 0.260413 | 0.87  |
| MEFV      | 0.63 | 0.260412 | 0.87  |
| MEIS1     | 0.63 | 0.2851   | 0.884 |
| MESDC2    | 0.63 | 0.260412 | 0.87  |
| MOGAT3    | 0.63 | 0.260413 | 0.87  |
| MRPL35    | 0.63 | 0.260413 | 0.87  |
| MRPS15    | 0.63 | 0.2851   | 0.884 |
| MRPS35    | 0.63 | 0.260412 | 0.87  |
| MUC2      | 0.63 | 0.312477 | 0.895 |
| NCAPH     | 0.63 | 0.260413 | 0.87  |
| OGFR      | 0.63 | 0.285099 | 0.884 |
| OR13G1    | 0.63 | 0.260413 | 0.87  |
| OR2C1     | 0.63 | 0.260413 | 0.87  |
| OR52E4    | 0.63 | 0.260413 | 0.87  |
| OR5I1     | 0.63 | 0.260413 | 0.87  |
| PAX1      | 0.63 | 0.260412 | 0.87  |
| PDE4A     | 0.63 | 0.260412 | 0.87  |
| PET117    | 0.63 | 0.260413 | 0.87  |
| PKP2      | 0.63 | 0.260413 | 0.87  |
| PLA2G2A   | 0.63 | 0.260413 | 0.87  |
| PLBD1     | 0.63 | 0.260413 | 0.87  |
| PNRC1     | 0.63 | 0.260413 | 0.87  |
| PSMD6     | 0.63 | 0.343378 | 0.904 |
| PTCH1     | 0.63 | 0.2851   | 0.884 |
| RAPGEFL1  | 0.63 | 0.260413 | 0.87  |
| RBP5      | 0.63 | 0.260412 | 0.87  |
| SCHIP1    | 0.63 | 0.260413 | 0.87  |
| SLC39A10  | 0.63 | 0.260413 | 0.87  |
| SLC5A9    | 0.63 | 0.260413 | 0.87  |
| STARD9    | 0.63 | 0.260413 | 0.87  |
| STMN3     | 0.63 | 0.285099 | 0.884 |
| TGFB1     | 0.63 | 0.260413 | 0.87  |
| TNFRSF12A | 0.63 | 0.260413 | 0.87  |
| TOMM20    | 0.63 | 0.260413 | 0.87  |
| TRMU      | 0.63 | 0.260413 | 0.87  |

|          |      |          |       |
|----------|------|----------|-------|
| VCP      | 0.63 | 0.260413 | 0.87  |
| VPS4B    | 0.63 | 0.260413 | 0.87  |
| XYLB     | 0.63 | 0.260413 | 0.87  |
| YWHAH    | 0.63 | 0.260413 | 0.87  |
| ZFP36    | 0.63 | 0.260413 | 0.87  |
| ZNF517   | 0.63 | 0.260413 | 0.87  |
| ZNF675   | 0.63 | 0.343378 | 0.904 |
| AADACL3  | 0.64 | 0.25315  | 0.868 |
| ADAMDEC1 | 0.64 | 0.25315  | 0.868 |
| ADHFE1   | 0.64 | 0.25315  | 0.868 |
| AMBN     | 0.64 | 0.253149 | 0.868 |
| AMN      | 0.64 | 0.253149 | 0.868 |
| ANO10    | 0.64 | 0.25315  | 0.868 |
| BBOX1    | 0.64 | 0.25315  | 0.868 |
| C10orf95 | 0.64 | 0.25315  | 0.868 |
| C9orf153 | 0.64 | 0.277763 | 0.88  |
| CABP7    | 0.64 | 0.253149 | 0.868 |
| CAMSAP3  | 0.64 | 0.25315  | 0.868 |
| CASP3    | 0.64 | 0.25315  | 0.868 |
| CCDC60   | 0.64 | 0.25315  | 0.868 |
| CCDC62   | 0.64 | 0.25315  | 0.868 |
| CCL3L3   | 0.64 | 0.25315  | 0.868 |
| CDC42EP2 | 0.64 | 0.25315  | 0.868 |
| CLVS2    | 0.64 | 0.25315  | 0.868 |
| COBLL1   | 0.64 | 0.25315  | 0.868 |
| DNAH10   | 0.64 | 0.305046 | 0.891 |
| EIF3M    | 0.64 | 0.25315  | 0.868 |
| FAM129C  | 0.64 | 0.25315  | 0.868 |
| FAM154A  | 0.64 | 0.25315  | 0.868 |
| FAM194B  | 0.64 | 0.305046 | 0.891 |
| FAM26E   | 0.64 | 0.25315  | 0.868 |
| FST      | 0.64 | 0.25315  | 0.868 |
| GNRHR    | 0.64 | 0.25315  | 0.868 |
| GOLGA8B  | 0.64 | 0.253149 | 0.868 |
| INHBB    | 0.64 | 0.25315  | 0.868 |
| JAK1     | 0.64 | 0.25315  | 0.868 |
| KLHL21   | 0.64 | 0.25315  | 0.868 |
| LHX8     | 0.64 | 0.25315  | 0.868 |
| LPAR4    | 0.64 | 0.25315  | 0.868 |
| LRIF1    | 0.64 | 0.25315  | 0.868 |
| LYPD3    | 0.64 | 0.25315  | 0.868 |
| MAK16    | 0.64 | 0.277763 | 0.88  |
| MAPT     | 0.64 | 0.25315  | 0.868 |
| MEI4     | 0.64 | 0.25315  | 0.868 |
| MRE11A   | 0.64 | 0.277763 | 0.88  |
| NKAIN3   | 0.64 | 0.25315  | 0.868 |
| OR2AT4   | 0.64 | 0.277763 | 0.88  |

|         |      |          |       |
|---------|------|----------|-------|
| OSBPL5  | 0.64 | 0.25315  | 0.868 |
| PAMR1   | 0.64 | 0.25315  | 0.868 |
| PFKM    | 0.64 | 0.253149 | 0.868 |
| PHF14   | 0.64 | 0.25315  | 0.868 |
| PIGW    | 0.64 | 0.277763 | 0.88  |
| PTGER4  | 0.64 | 0.25315  | 0.868 |
| PTGFR   | 0.64 | 0.253149 | 0.868 |
| RAE1    | 0.64 | 0.277763 | 0.88  |
| RSPO4   | 0.64 | 0.253149 | 0.868 |
| SIDT2   | 0.64 | 0.25315  | 0.868 |
| SMAD4   | 0.64 | 0.25315  | 0.868 |
| SMEK2   | 0.64 | 0.25315  | 0.868 |
| SNX20   | 0.64 | 0.25315  | 0.868 |
| SNX8    | 0.64 | 0.25315  | 0.868 |
| STK4    | 0.64 | 0.25315  | 0.868 |
| TIPIN   | 0.64 | 0.25315  | 0.868 |
| TLR3    | 0.64 | 0.253149 | 0.868 |
| TMPRSS6 | 0.64 | 0.25315  | 0.868 |
| TRIP13  | 0.64 | 0.277763 | 0.88  |
| TSPAN5  | 0.64 | 0.25315  | 0.868 |
| UFD1L   | 0.64 | 0.277763 | 0.88  |
| VMP1    | 0.64 | 0.25315  | 0.868 |
| WNT1    | 0.64 | 0.277763 | 0.88  |
| WNT10B  | 0.64 | 0.25315  | 0.868 |
| ZNF177  | 0.64 | 0.25315  | 0.868 |
| ZNF667  | 0.64 | 0.25315  | 0.868 |
| ACTR2   | 0.65 | 0.270513 | 0.875 |
| ACTR8   | 0.65 | 0.297757 | 0.886 |
| ACTRT1  | 0.65 | 0.246043 | 0.863 |
| BAHD1   | 0.65 | 0.246043 | 0.863 |
| BECN1   | 0.65 | 0.246043 | 0.863 |
| C7orf60 | 0.65 | 0.246043 | 0.863 |
| CBR3    | 0.65 | 0.246043 | 0.863 |
| CD3E    | 0.65 | 0.246043 | 0.863 |
| CD70    | 0.65 | 0.246043 | 0.863 |
| CDKN3   | 0.65 | 0.246043 | 0.863 |
| CDON    | 0.65 | 0.246043 | 0.863 |
| DSC3    | 0.65 | 0.246043 | 0.863 |
| ERO1LB  | 0.65 | 0.270513 | 0.875 |
| F11     | 0.65 | 0.246043 | 0.863 |
| FABP1   | 0.65 | 0.246043 | 0.863 |
| FAM131A | 0.65 | 0.246043 | 0.863 |
| FAM83D  | 0.65 | 0.270513 | 0.875 |
| FOXI3   | 0.65 | 0.246043 | 0.863 |
| GABRR1  | 0.65 | 0.246043 | 0.863 |
| GPX3    | 0.65 | 0.246043 | 0.863 |
| IDH3A   | 0.65 | 0.246043 | 0.863 |

|            |      |          |       |
|------------|------|----------|-------|
| IFNA14     | 0.65 | 0.270513 | 0.875 |
| IL8        | 0.65 | 0.246043 | 0.863 |
| LAMA2      | 0.65 | 0.246043 | 0.863 |
| LCOR       | 0.65 | 0.246043 | 0.863 |
| LOC100287C | 0.65 | 0.246043 | 0.863 |
| LPL        | 0.65 | 0.246043 | 0.863 |
| MAGEA6     | 0.65 | 0.246043 | 0.863 |
| MAGI2      | 0.65 | 0.270512 | 0.875 |
| MAP2K4     | 0.65 | 0.246043 | 0.863 |
| MED24      | 0.65 | 0.246043 | 0.863 |
| MFSD6      | 0.65 | 0.270513 | 0.875 |
| MIPOL1     | 0.65 | 0.246043 | 0.863 |
| MORF4L1    | 0.65 | 0.246043 | 0.863 |
| MPHOSPH1   | 0.65 | 0.270513 | 0.875 |
| MPI        | 0.65 | 0.246043 | 0.863 |
| MRGPRG     | 0.65 | 0.246043 | 0.863 |
| MRP63      | 0.65 | 0.297757 | 0.886 |
| MRPS18B    | 0.65 | 0.270513 | 0.875 |
| NCAPD2     | 0.65 | 0.270513 | 0.875 |
| NLRP9      | 0.65 | 0.246043 | 0.863 |
| NRIP1      | 0.65 | 0.246043 | 0.863 |
| NRP2       | 0.65 | 0.246043 | 0.863 |
| NTN3       | 0.65 | 0.246043 | 0.863 |
| ODF3       | 0.65 | 0.246043 | 0.863 |
| OR4P4      | 0.65 | 0.246043 | 0.863 |
| OR5H14     | 0.65 | 0.246043 | 0.863 |
| P2RY13     | 0.65 | 0.246043 | 0.863 |
| PADI1      | 0.65 | 0.246043 | 0.863 |
| PDZD8      | 0.65 | 0.246043 | 0.863 |
| PHF16      | 0.65 | 0.270512 | 0.875 |
| PIGG       | 0.65 | 0.270513 | 0.875 |
| PPME1      | 0.65 | 0.270513 | 0.875 |
| PPP1R12C   | 0.65 | 0.246043 | 0.863 |
| RAB14      | 0.65 | 0.246043 | 0.863 |
| RAB2B      | 0.65 | 0.246043 | 0.863 |
| RBFOX2     | 0.65 | 0.246043 | 0.863 |
| SEZ6L2     | 0.65 | 0.246043 | 0.863 |
| SH3GLB1    | 0.65 | 0.246043 | 0.863 |
| SLC35B3    | 0.65 | 0.246043 | 0.863 |
| SLC9A2     | 0.65 | 0.246043 | 0.863 |
| SPATS2     | 0.65 | 0.297757 | 0.886 |
| SPTY2D1    | 0.65 | 0.246043 | 0.863 |
| ST6GALNAC  | 0.65 | 0.270512 | 0.875 |
| TG         | 0.65 | 0.246043 | 0.863 |
| TIMM8A     | 0.65 | 0.270513 | 0.875 |
| TRIM27     | 0.65 | 0.246043 | 0.863 |
| TRMT6      | 0.65 | 0.246043 | 0.863 |

|            |      |          |       |
|------------|------|----------|-------|
| TUBA1A     | 0.65 | 0.297757 | 0.886 |
| VSX1       | 0.65 | 0.270513 | 0.875 |
| WBP5       | 0.65 | 0.270512 | 0.875 |
| ZNF551     | 0.65 | 0.246043 | 0.863 |
| ZNF680     | 0.65 | 0.270513 | 0.875 |
| AKR1C2     | 0.66 | 0.263421 | 0.873 |
| ANKS4B     | 0.66 | 0.239085 | 0.859 |
| ANXA1      | 0.66 | 0.239085 | 0.859 |
| BTG2       | 0.66 | 0.239085 | 0.859 |
| C1QTNF1    | 0.66 | 0.26342  | 0.873 |
| C20orf201  | 0.66 | 0.239085 | 0.859 |
| C21orf140  | 0.66 | 0.26342  | 0.873 |
| C7orf55    | 0.66 | 0.239085 | 0.859 |
| CCNF       | 0.66 | 0.26342  | 0.873 |
| CCR6       | 0.66 | 0.239085 | 0.859 |
| CHD4       | 0.66 | 0.263421 | 0.873 |
| CHRNA5     | 0.66 | 0.239086 | 0.859 |
| CLEC1A     | 0.66 | 0.239085 | 0.859 |
| COL28A1    | 0.66 | 0.263421 | 0.873 |
| CPNE2      | 0.66 | 0.239085 | 0.859 |
| CRLF3      | 0.66 | 0.239085 | 0.859 |
| CYP3A43    | 0.66 | 0.239086 | 0.859 |
| DDX18      | 0.66 | 0.26342  | 0.873 |
| DUOX1      | 0.66 | 0.239086 | 0.859 |
| EIF3E      | 0.66 | 0.26342  | 0.873 |
| FAM26F     | 0.66 | 0.239086 | 0.859 |
| FAM76A     | 0.66 | 0.239085 | 0.859 |
| FGF18      | 0.66 | 0.239086 | 0.859 |
| GAR1       | 0.66 | 0.263421 | 0.873 |
| GRM2       | 0.66 | 0.239085 | 0.859 |
| ITFG3      | 0.66 | 0.239086 | 0.859 |
| JAKMIP1    | 0.66 | 0.239086 | 0.859 |
| KDEL3      | 0.66 | 0.239085 | 0.859 |
| KIAA2013   | 0.66 | 0.239085 | 0.859 |
| KLK2       | 0.66 | 0.239086 | 0.859 |
| KRTAP9-1   | 0.66 | 0.239086 | 0.859 |
| LOC1005056 | 0.66 | 0.446731 | 0.924 |
| LURAP1L    | 0.66 | 0.263421 | 0.873 |
| LYPLA1     | 0.66 | 0.239085 | 0.859 |
| LYSMD2     | 0.66 | 0.239085 | 0.859 |
| MAP3K13    | 0.66 | 0.239085 | 0.859 |
| MSH5       | 0.66 | 0.26342  | 0.873 |
| MYF6       | 0.66 | 0.239085 | 0.859 |
| NECAP2     | 0.66 | 0.239085 | 0.859 |
| NMB        | 0.66 | 0.239085 | 0.859 |
| OR2V1      | 0.66 | 0.239085 | 0.859 |
| PSMD12     | 0.66 | 0.321561 | 0.9   |

|          |      |          |       |
|----------|------|----------|-------|
| PTPRB    | 0.66 | 0.239085 | 0.859 |
| RBP7     | 0.66 | 0.239086 | 0.859 |
| RERE     | 0.66 | 0.263421 | 0.873 |
| RILPL2   | 0.66 | 0.290615 | 0.884 |
| RYR3     | 0.66 | 0.263421 | 0.873 |
| SELE     | 0.66 | 0.239085 | 0.859 |
| SERPINA1 | 0.66 | 0.239085 | 0.859 |
| SLC25A12 | 0.66 | 0.239086 | 0.859 |
| SLC25A34 | 0.66 | 0.239085 | 0.859 |
| SLC25A40 | 0.66 | 0.239086 | 0.859 |
| SLTM     | 0.66 | 0.239086 | 0.859 |
| SPHK1    | 0.66 | 0.239085 | 0.859 |
| SRSF3    | 0.66 | 0.239085 | 0.859 |
| SULT1C4  | 0.66 | 0.239085 | 0.859 |
| TAF3     | 0.66 | 0.290615 | 0.884 |
| TLE1     | 0.66 | 0.239085 | 0.859 |
| TMX2     | 0.66 | 0.239085 | 0.859 |
| TOR1B    | 0.66 | 0.239085 | 0.859 |
| TPSG1    | 0.66 | 0.239086 | 0.859 |
| TRMT61A  | 0.66 | 0.290614 | 0.884 |
| TTC39C   | 0.66 | 0.26342  | 0.873 |
| TWISTNB  | 0.66 | 0.239085 | 0.859 |
| UNC79    | 0.66 | 0.290615 | 0.884 |
| UQCC1    | 0.66 | 0.26342  | 0.873 |
| VCX3B    | 0.66 | 0.239086 | 0.859 |
| ZFHx4    | 0.66 | 0.239085 | 0.859 |
| ZFYVE20  | 0.66 | 0.26342  | 0.873 |
| ZNF287   | 0.66 | 0.239085 | 0.859 |
| ZNF654   | 0.66 | 0.239086 | 0.859 |
| ALDH2    | 0.67 | 0.232222 | 0.854 |
| AMMECR1L | 0.67 | 0.232222 | 0.854 |
| ANKRD62  | 0.67 | 0.232222 | 0.854 |
| ARL4C    | 0.67 | 0.232222 | 0.854 |
| ARR3     | 0.67 | 0.232222 | 0.854 |
| ASCL3    | 0.67 | 0.232222 | 0.854 |
| ASIC4    | 0.67 | 0.232222 | 0.854 |
| C15orf38 | 0.67 | 0.232222 | 0.854 |
| C8orf4   | 0.67 | 0.232222 | 0.854 |
| CASQ1    | 0.67 | 0.232222 | 0.854 |
| CPLX3    | 0.67 | 0.256435 | 0.87  |
| DES12    | 0.67 | 0.232222 | 0.854 |
| DNAJB4   | 0.67 | 0.232222 | 0.854 |
| FAM167A  | 0.67 | 0.232222 | 0.854 |
| FAM47E   | 0.67 | 0.232222 | 0.854 |
| G6PC     | 0.67 | 0.232222 | 0.854 |
| GH1      | 0.67 | 0.232222 | 0.854 |
| GSPT1    | 0.67 | 0.256435 | 0.87  |

|           |      |          |       |
|-----------|------|----------|-------|
| HIST1H2BK | 0.67 | 0.232222 | 0.854 |
| HMGXB3    | 0.67 | 0.232222 | 0.854 |
| ILF2      | 0.67 | 0.232222 | 0.854 |
| IP6K2     | 0.67 | 0.256435 | 0.87  |
| KIR3DL2   | 0.67 | 0.232222 | 0.854 |
| KRTAP10-1 | 0.67 | 0.232222 | 0.854 |
| LAMP1     | 0.67 | 0.232222 | 0.854 |
| MANBAL    | 0.67 | 0.232222 | 0.854 |
| MANSC1    | 0.67 | 0.232222 | 0.854 |
| MAP1LC3B2 | 0.67 | 0.232222 | 0.854 |
| MIER1     | 0.67 | 0.232222 | 0.854 |
| MOGAT1    | 0.67 | 0.232222 | 0.854 |
| MRPS24    | 0.67 | 0.256435 | 0.87  |
| MSL1      | 0.67 | 0.256435 | 0.87  |
| MT1H      | 0.67 | 0.350127 | 0.904 |
| NELFA     | 0.67 | 0.256435 | 0.87  |
| NKTR      | 0.67 | 0.256435 | 0.87  |
| OBP2B     | 0.67 | 0.232222 | 0.854 |
| OR52N1    | 0.67 | 0.232222 | 0.854 |
| ORAI3     | 0.67 | 0.232222 | 0.854 |
| OSTN      | 0.67 | 0.232222 | 0.854 |
| PCOLCE2   | 0.67 | 0.256435 | 0.87  |
| PIGC      | 0.67 | 0.232222 | 0.854 |
| PIGT      | 0.67 | 0.232222 | 0.854 |
| PROM1     | 0.67 | 0.232222 | 0.854 |
| PTPRA     | 0.67 | 0.232222 | 0.854 |
| PTPRN     | 0.67 | 0.232222 | 0.854 |
| PTPRZ1    | 0.67 | 0.232222 | 0.854 |
| RASGRP3   | 0.67 | 0.232222 | 0.854 |
| REPS2     | 0.67 | 0.232222 | 0.854 |
| S100A5    | 0.67 | 0.232222 | 0.854 |
| SCD       | 0.67 | 0.232222 | 0.854 |
| SERAC1    | 0.67 | 0.256435 | 0.87  |
| SLC13A5   | 0.67 | 0.232222 | 0.854 |
| SLC16A7   | 0.67 | 0.232222 | 0.854 |
| SMIM6     | 0.67 | 0.232222 | 0.854 |
| SULT1B1   | 0.67 | 0.232222 | 0.854 |
| SYCP2L    | 0.67 | 0.232222 | 0.854 |
| SYNRG     | 0.67 | 0.232222 | 0.854 |
| TEDDM1    | 0.67 | 0.256435 | 0.87  |
| TMEM240   | 0.67 | 0.232222 | 0.854 |
| TTC5      | 0.67 | 0.232222 | 0.854 |
| TXNDC2    | 0.67 | 0.256435 | 0.87  |
| ZDHHC14   | 0.67 | 0.232222 | 0.854 |
| AKAP7     | 0.68 | 0.225496 | 0.849 |
| ALKBH2    | 0.68 | 0.225496 | 0.849 |
| AP5Z1     | 0.68 | 0.225496 | 0.849 |

|            |      |          |       |
|------------|------|----------|-------|
| B4GALT4    | 0.68 | 0.225496 | 0.849 |
| BCL2L11    | 0.68 | 0.225496 | 0.849 |
| C18orf21   | 0.68 | 0.225496 | 0.849 |
| C3orf55    | 0.68 | 0.225497 | 0.849 |
| CBX2       | 0.68 | 0.225496 | 0.849 |
| CLIC1      | 0.68 | 0.225496 | 0.849 |
| CRAMP1L    | 0.68 | 0.225496 | 0.849 |
| CST6       | 0.68 | 0.225496 | 0.849 |
| CSTF2T     | 0.68 | 0.225496 | 0.849 |
| CYB5B      | 0.68 | 0.225496 | 0.849 |
| ELMOD3     | 0.68 | 0.225496 | 0.849 |
| ERAL1      | 0.68 | 0.249616 | 0.868 |
| FAM132B    | 0.68 | 0.225496 | 0.849 |
| FCHSD1     | 0.68 | 0.225496 | 0.849 |
| GAB3       | 0.68 | 0.225496 | 0.849 |
| GABPB1     | 0.68 | 0.225496 | 0.849 |
| GAL3ST2    | 0.68 | 0.225496 | 0.849 |
| GLO1       | 0.68 | 0.225496 | 0.849 |
| GOLGA8O    | 0.68 | 0.225496 | 0.849 |
| GPR63      | 0.68 | 0.225496 | 0.849 |
| GUF1       | 0.68 | 0.225496 | 0.849 |
| HIST1H2BJ  | 0.68 | 0.249616 | 0.868 |
| HSD3B1     | 0.68 | 0.225496 | 0.849 |
| IRX1       | 0.68 | 0.225497 | 0.849 |
| KLK9       | 0.68 | 0.225496 | 0.849 |
| KRTAP19-6  | 0.68 | 0.225497 | 0.849 |
| KRTAP4-8   | 0.68 | 0.276574 | 0.88  |
| LEMD3      | 0.68 | 0.249616 | 0.868 |
| LETMD1     | 0.68 | 0.225496 | 0.849 |
| LMNB1      | 0.68 | 0.225496 | 0.849 |
| LOC1001328 | 0.68 | 0.225496 | 0.849 |
| MESP1      | 0.68 | 0.225496 | 0.849 |
| MMP1       | 0.68 | 0.225496 | 0.849 |
| MRPL37     | 0.68 | 0.225497 | 0.849 |
| MRPL49     | 0.68 | 0.249617 | 0.868 |
| MRPS14     | 0.68 | 0.225497 | 0.849 |
| NKRF       | 0.68 | 0.225496 | 0.849 |
| NLRP13     | 0.68 | 0.225496 | 0.849 |
| OPN1LW     | 0.68 | 0.225496 | 0.849 |
| OR13C5     | 0.68 | 0.225496 | 0.849 |
| OTOA       | 0.68 | 0.225496 | 0.849 |
| PDE1B      | 0.68 | 0.225496 | 0.849 |
| PDE8B      | 0.68 | 0.249617 | 0.868 |
| PI4K2B     | 0.68 | 0.225496 | 0.849 |
| PITPNM1    | 0.68 | 0.225496 | 0.849 |
| PLEKHG2    | 0.68 | 0.225496 | 0.849 |
| POLR2J2    | 0.68 | 0.433381 | 0.924 |

|          |      |          |       |
|----------|------|----------|-------|
| PPP1R16A | 0.68 | 0.225496 | 0.849 |
| PPP2R1A  | 0.68 | 0.225496 | 0.849 |
| PRPF18   | 0.68 | 0.276575 | 0.88  |
| PRSS56   | 0.68 | 0.225496 | 0.849 |
| ROMO1    | 0.68 | 0.225496 | 0.849 |
| SCAF1    | 0.68 | 0.384992 | 0.908 |
| SCPEP1   | 0.68 | 0.225496 | 0.849 |
| SENP1    | 0.68 | 0.249616 | 0.868 |
| SFXN2    | 0.68 | 0.225496 | 0.849 |
| SIGLEC8  | 0.68 | 0.249616 | 0.868 |
| SIRT1    | 0.68 | 0.225496 | 0.849 |
| SKIL     | 0.68 | 0.225496 | 0.849 |
| SLC25A24 | 0.68 | 0.249616 | 0.868 |
| SORCS1   | 0.68 | 0.225496 | 0.849 |
| SPACA1   | 0.68 | 0.225496 | 0.849 |
| STX8     | 0.68 | 0.276574 | 0.88  |
| SYNCRIP  | 0.68 | 0.276575 | 0.88  |
| TAS2R3   | 0.68 | 0.225496 | 0.849 |
| TCF24    | 0.68 | 0.225496 | 0.849 |
| TMEM102  | 0.68 | 0.225496 | 0.849 |
| TMEM106C | 0.68 | 0.225497 | 0.849 |
| WDTC1    | 0.68 | 0.225496 | 0.849 |
| ZNF580   | 0.68 | 0.307576 | 0.891 |
| ZNF700   | 0.68 | 0.225496 | 0.849 |
| AARD     | 0.69 | 0.21898  | 0.848 |
| ACKR4    | 0.69 | 0.21898  | 0.848 |
| AGXT     | 0.69 | 0.242921 | 0.863 |
| ASAP2    | 0.69 | 0.21898  | 0.848 |
| ATG16L2  | 0.69 | 0.21898  | 0.848 |
| BHLHE23  | 0.69 | 0.21898  | 0.848 |
| BTN3A2   | 0.69 | 0.21898  | 0.848 |
| C12orf40 | 0.69 | 0.21898  | 0.848 |
| CABLES2  | 0.69 | 0.21898  | 0.848 |
| CACNA1A  | 0.69 | 0.242921 | 0.863 |
| CD44     | 0.69 | 0.218979 | 0.848 |
| CDCA2    | 0.69 | 0.21898  | 0.848 |
| CEP192   | 0.69 | 0.24292  | 0.863 |
| CHAF1A   | 0.69 | 0.269827 | 0.875 |
| CPOX     | 0.69 | 0.218979 | 0.848 |
| DIAPH2   | 0.69 | 0.21898  | 0.848 |
| ENOPH1   | 0.69 | 0.21898  | 0.848 |
| EVPL     | 0.69 | 0.24292  | 0.863 |
| EXOC6    | 0.69 | 0.21898  | 0.848 |
| F11R     | 0.69 | 0.21898  | 0.848 |
| FAM98B   | 0.69 | 0.21898  | 0.848 |
| FAXC     | 0.69 | 0.21898  | 0.848 |
| FBXO2    | 0.69 | 0.21898  | 0.848 |

|            |      |          |       |
|------------|------|----------|-------|
| GALNT13    | 0.69 | 0.21898  | 0.848 |
| HAVCR1     | 0.69 | 0.218979 | 0.848 |
| HELT       | 0.69 | 0.242921 | 0.863 |
| HMG4       | 0.69 | 0.21898  | 0.848 |
| HSF4       | 0.69 | 0.21898  | 0.848 |
| IGFBP3     | 0.69 | 0.21898  | 0.848 |
| IRF1       | 0.69 | 0.21898  | 0.848 |
| KARS       | 0.69 | 0.242921 | 0.863 |
| KCNJ12     | 0.69 | 0.24292  | 0.863 |
| KRTAP6-2   | 0.69 | 0.21898  | 0.848 |
| MDGA1      | 0.69 | 0.218979 | 0.848 |
| MED10      | 0.69 | 0.21898  | 0.848 |
| MS4A6E     | 0.69 | 0.21898  | 0.848 |
| MYADM      | 0.69 | 0.242921 | 0.863 |
| MYO1E      | 0.69 | 0.21898  | 0.848 |
| NAGS       | 0.69 | 0.21898  | 0.848 |
| NXPH2      | 0.69 | 0.21898  | 0.848 |
| OPA1       | 0.69 | 0.21898  | 0.848 |
| OR10A2     | 0.69 | 0.218979 | 0.848 |
| OR10A3     | 0.69 | 0.21898  | 0.848 |
| OR10V1     | 0.69 | 0.21898  | 0.848 |
| OSR1       | 0.69 | 0.21898  | 0.848 |
| PARP16     | 0.69 | 0.24292  | 0.863 |
| PGLYRP4    | 0.69 | 0.218979 | 0.848 |
| PIEZO1     | 0.69 | 0.21898  | 0.848 |
| PLEKHG1    | 0.69 | 0.21898  | 0.848 |
| PRRG1      | 0.69 | 0.218979 | 0.848 |
| PXDN       | 0.69 | 0.21898  | 0.848 |
| RBM4       | 0.69 | 0.21898  | 0.848 |
| RORC       | 0.69 | 0.21898  | 0.848 |
| RPS12      | 0.69 | 0.269827 | 0.875 |
| RPS16      | 0.69 | 0.269827 | 0.875 |
| SCGB3A2    | 0.69 | 0.21898  | 0.848 |
| SF3A1      | 0.69 | 0.300689 | 0.889 |
| SLC5A7     | 0.69 | 0.21898  | 0.848 |
| SNAI2      | 0.69 | 0.242921 | 0.863 |
| STAMBP     | 0.69 | 0.21898  | 0.848 |
| TMEM179B   | 0.69 | 0.218979 | 0.848 |
| TMEM189-U  | 0.69 | 0.21898  | 0.848 |
| TRIM40     | 0.69 | 0.21898  | 0.848 |
| TSNAXIP1   | 0.69 | 0.21898  | 0.848 |
| TTC21B     | 0.69 | 0.21898  | 0.848 |
| TYRP1      | 0.69 | 0.21898  | 0.848 |
| ZBTB47     | 0.69 | 0.269827 | 0.875 |
| ZIC4       | 0.69 | 0.21898  | 0.848 |
| ZNF559-ZNF | 0.69 | 0.218979 | 0.848 |
| ANKIB1     | 0.7  | 0.212514 | 0.846 |

|           |     |          |       |
|-----------|-----|----------|-------|
| APCS      | 0.7 | 0.212514 | 0.846 |
| ARHGAP21  | 0.7 | 0.212514 | 0.846 |
| BMP10     | 0.7 | 0.212514 | 0.846 |
| C19orf81  | 0.7 | 0.212513 | 0.846 |
| C1orf109  | 0.7 | 0.263098 | 0.873 |
| CCAR1     | 0.7 | 0.236326 | 0.859 |
| CLIP4     | 0.7 | 0.212513 | 0.846 |
| CMC1      | 0.7 | 0.236325 | 0.859 |
| CNIH3     | 0.7 | 0.212514 | 0.846 |
| CSN1S1    | 0.7 | 0.212513 | 0.846 |
| DDX17     | 0.7 | 0.212514 | 0.846 |
| DLGAP5    | 0.7 | 0.212514 | 0.846 |
| DNAJB9    | 0.7 | 0.212513 | 0.846 |
| EBNA1BP2  | 0.7 | 0.236326 | 0.859 |
| EEF1G     | 0.7 | 0.212514 | 0.846 |
| EFNA2     | 0.7 | 0.212513 | 0.846 |
| FLRT1     | 0.7 | 0.212514 | 0.846 |
| GPBP1     | 0.7 | 0.212514 | 0.846 |
| GPC6      | 0.7 | 0.212513 | 0.846 |
| GPSM2     | 0.7 | 0.212514 | 0.846 |
| GTPBP3    | 0.7 | 0.212513 | 0.846 |
| IL36G     | 0.7 | 0.212513 | 0.846 |
| KCNB1     | 0.7 | 0.236325 | 0.859 |
| KIAA2022  | 0.7 | 0.236326 | 0.859 |
| KRTAP10-5 | 0.7 | 0.212514 | 0.846 |
| MAPKAP1   | 0.7 | 0.212514 | 0.846 |
| MOV10L1   | 0.7 | 0.212513 | 0.846 |
| NKX3-2    | 0.7 | 0.212514 | 0.846 |
| NPFFR1    | 0.7 | 0.212513 | 0.846 |
| NUPR2     | 0.7 | 0.212514 | 0.846 |
| OR56A4    | 0.7 | 0.212514 | 0.846 |
| PATE4     | 0.7 | 0.212514 | 0.846 |
| PCDHB12   | 0.7 | 0.212513 | 0.846 |
| PDXDC1    | 0.7 | 0.212514 | 0.846 |
| PF4       | 0.7 | 0.212514 | 0.846 |
| PIFO      | 0.7 | 0.212514 | 0.846 |
| PMP22     | 0.7 | 0.236325 | 0.859 |
| PPIH      | 0.7 | 0.212513 | 0.846 |
| PRKAB1    | 0.7 | 0.236326 | 0.859 |
| PWWP2B    | 0.7 | 0.212513 | 0.846 |
| RAB8A     | 0.7 | 0.212514 | 0.846 |
| RBPMS     | 0.7 | 0.212514 | 0.846 |
| RD3       | 0.7 | 0.212513 | 0.846 |
| RPP40     | 0.7 | 0.212514 | 0.846 |
| SCN8A     | 0.7 | 0.212514 | 0.846 |
| SFXN1     | 0.7 | 0.212514 | 0.846 |
| SLC17A7   | 0.7 | 0.212514 | 0.846 |

|           |      |          |       |
|-----------|------|----------|-------|
| SLC4A8    | 0.7  | 0.212514 | 0.846 |
| SLCO4A1   | 0.7  | 0.212514 | 0.846 |
| SRCRB4D   | 0.7  | 0.236326 | 0.859 |
| SSNA1     | 0.7  | 0.236325 | 0.859 |
| ST6GALNAC | 0.7  | 0.212514 | 0.846 |
| SUCLG2    | 0.7  | 0.212514 | 0.846 |
| TAF10     | 0.7  | 0.212514 | 0.846 |
| TBCK      | 0.7  | 0.212513 | 0.846 |
| TLE6      | 0.7  | 0.212513 | 0.846 |
| TMEM248   | 0.7  | 0.212514 | 0.846 |
| TPSD1     | 0.7  | 0.212513 | 0.846 |
| TXLNG     | 0.7  | 0.212513 | 0.846 |
| USP18     | 0.7  | 0.212514 | 0.846 |
| WDR5      | 0.7  | 0.329607 | 0.901 |
| WNT7A     | 0.7  | 0.212513 | 0.846 |
| ZAP70     | 0.7  | 0.212513 | 0.846 |
| ZNF280B   | 0.7  | 0.212513 | 0.846 |
| ZNF549    | 0.7  | 0.212514 | 0.846 |
| ZNF630    | 0.7  | 0.212513 | 0.846 |
| ZNF841    | 0.7  | 0.212513 | 0.846 |
| ZSCAN20   | 0.7  | 0.236326 | 0.859 |
| APOC1     | 0.71 | 0.206238 | 0.845 |
| ASNSD1    | 0.71 | 0.206238 | 0.845 |
| BRSK2     | 0.71 | 0.206239 | 0.845 |
| C3AR1     | 0.71 | 0.206238 | 0.845 |
| C5orf28   | 0.71 | 0.229797 | 0.854 |
| C9orf78   | 0.71 | 0.206239 | 0.845 |
| CABP2     | 0.71 | 0.206238 | 0.845 |
| CASC5     | 0.71 | 0.206239 | 0.845 |
| CD59      | 0.71 | 0.206238 | 0.845 |
| CERS2     | 0.71 | 0.206238 | 0.845 |
| CHRNA3    | 0.71 | 0.206238 | 0.845 |
| CLK1      | 0.71 | 0.206238 | 0.845 |
| CLUL1     | 0.71 | 0.206238 | 0.845 |
| CNIH4     | 0.71 | 0.206238 | 0.845 |
| DRD3      | 0.71 | 0.206238 | 0.845 |
| ECH1      | 0.71 | 0.206238 | 0.845 |
| EED       | 0.71 | 0.206238 | 0.845 |
| FGL2      | 0.71 | 0.206239 | 0.845 |
| GOPC      | 0.71 | 0.206238 | 0.845 |
| HUWE1     | 0.71 | 0.206238 | 0.845 |
| KCNJ1     | 0.71 | 0.206239 | 0.845 |
| LATS1     | 0.71 | 0.206238 | 0.845 |
| LRIT2     | 0.71 | 0.206239 | 0.845 |
| MPHOSPH9  | 0.71 | 0.206239 | 0.845 |
| MTERFD1   | 0.71 | 0.206239 | 0.845 |
| MTFP1     | 0.71 | 0.206239 | 0.845 |

|          |      |          |       |
|----------|------|----------|-------|
| NANOG    | 0.71 | 0.206239 | 0.845 |
| OR12D2   | 0.71 | 0.206239 | 0.845 |
| PI4K2A   | 0.71 | 0.206238 | 0.845 |
| PPP1R32  | 0.71 | 0.206239 | 0.845 |
| PTCHD2   | 0.71 | 0.229797 | 0.854 |
| RBMY1E   | 0.71 | 0.206239 | 0.845 |
| RGL4     | 0.71 | 0.206238 | 0.845 |
| RGS7     | 0.71 | 0.206239 | 0.845 |
| SAMD1    | 0.71 | 0.229797 | 0.854 |
| SMAD9    | 0.71 | 0.229797 | 0.854 |
| SPACA7   | 0.71 | 0.206238 | 0.845 |
| STARD5   | 0.71 | 0.206238 | 0.845 |
| TMEM44   | 0.71 | 0.229796 | 0.854 |
| TMEM99   | 0.71 | 0.206239 | 0.845 |
| UTP6     | 0.71 | 0.229796 | 0.854 |
| WDR27    | 0.71 | 0.206239 | 0.845 |
| ZFYVE19  | 0.71 | 0.206238 | 0.845 |
| ZNF264   | 0.71 | 0.206238 | 0.845 |
| ZNF691   | 0.71 | 0.206239 | 0.845 |
| A2ML1    | 0.72 | 0.223557 | 0.849 |
| AIFM1    | 0.72 | 0.200074 | 0.838 |
| AP5S1    | 0.72 | 0.200074 | 0.838 |
| APAF1    | 0.72 | 0.200074 | 0.838 |
| ASB15    | 0.72 | 0.223557 | 0.849 |
| ATP8B1   | 0.72 | 0.200074 | 0.838 |
| C15orf60 | 0.72 | 0.200074 | 0.838 |
| C4orf40  | 0.72 | 0.200074 | 0.838 |
| C6orf222 | 0.72 | 0.200074 | 0.838 |
| CCNG2    | 0.72 | 0.200074 | 0.838 |
| CENPJ    | 0.72 | 0.200074 | 0.838 |
| CENPO    | 0.72 | 0.200074 | 0.838 |
| CERCAM   | 0.72 | 0.200074 | 0.838 |
| CISH     | 0.72 | 0.200074 | 0.838 |
| DEFB126  | 0.72 | 0.223557 | 0.849 |
| DGKB     | 0.72 | 0.200074 | 0.838 |
| DNAJC27  | 0.72 | 0.223557 | 0.849 |
| DTNB     | 0.72 | 0.200074 | 0.838 |
| DUSP10   | 0.72 | 0.223557 | 0.849 |
| ENOSF1   | 0.72 | 0.200074 | 0.838 |
| FAM174B  | 0.72 | 0.200074 | 0.838 |
| FAM71F2  | 0.72 | 0.200074 | 0.838 |
| FHL2     | 0.72 | 0.200074 | 0.838 |
| FTL      | 0.72 | 0.200074 | 0.838 |
| GAS2L3   | 0.72 | 0.200074 | 0.838 |
| GLI4     | 0.72 | 0.200074 | 0.838 |
| HOOK2    | 0.72 | 0.200074 | 0.838 |
| HTRA3    | 0.72 | 0.200074 | 0.838 |

|          |      |          |       |
|----------|------|----------|-------|
| IFFO2    | 0.72 | 0.200074 | 0.838 |
| IGFL2    | 0.72 | 0.200074 | 0.838 |
| INTS4    | 0.72 | 0.200074 | 0.838 |
| KHDRBS1  | 0.72 | 0.200074 | 0.838 |
| KRI1     | 0.72 | 0.358439 | 0.904 |
| LRRC42   | 0.72 | 0.200074 | 0.838 |
| LYRM1    | 0.72 | 0.200074 | 0.838 |
| MEIG1    | 0.72 | 0.316411 | 0.897 |
| MRGBP    | 0.72 | 0.200074 | 0.838 |
| MRPS25   | 0.72 | 0.200074 | 0.838 |
| MRPS30   | 0.72 | 0.200074 | 0.838 |
| NDUFV2   | 0.72 | 0.200074 | 0.838 |
| NMNAT2   | 0.72 | 0.200074 | 0.838 |
| ONECUT1  | 0.72 | 0.200074 | 0.838 |
| OR4K1    | 0.72 | 0.200074 | 0.838 |
| OR5H1    | 0.72 | 0.200074 | 0.838 |
| PCNXL2   | 0.72 | 0.250106 | 0.868 |
| PRAMEF9  | 0.72 | 0.200074 | 0.838 |
| PSMB4    | 0.72 | 0.223557 | 0.849 |
| PTGER3   | 0.72 | 0.200074 | 0.838 |
| PTPN11   | 0.72 | 0.223557 | 0.849 |
| RPUSD1   | 0.72 | 0.200074 | 0.838 |
| SFXN4    | 0.72 | 0.200074 | 0.838 |
| SLC22A25 | 0.72 | 0.200074 | 0.838 |
| SLC44A1  | 0.72 | 0.200074 | 0.838 |
| SRSF8    | 0.72 | 0.280799 | 0.88  |
| SUB1     | 0.72 | 0.250106 | 0.868 |
| SUZ12    | 0.72 | 0.200074 | 0.838 |
| TAPT1    | 0.72 | 0.200074 | 0.838 |
| TC2N     | 0.72 | 0.200074 | 0.838 |
| THBS1    | 0.72 | 0.200074 | 0.838 |
| TIMM9    | 0.72 | 0.280798 | 0.88  |
| UNC45B   | 0.72 | 0.223557 | 0.849 |
| USP24    | 0.72 | 0.200074 | 0.838 |
| YY1AP1   | 0.72 | 0.200074 | 0.838 |
| ZBTB42   | 0.72 | 0.200074 | 0.838 |
| ZBTB43   | 0.72 | 0.200074 | 0.838 |
| ZC2HC1C  | 0.72 | 0.200074 | 0.838 |
| ZMIZ2    | 0.72 | 0.200074 | 0.838 |
| AKAP8L   | 0.73 | 0.19403  | 0.837 |
| ARRDC2   | 0.73 | 0.19403  | 0.837 |
| BIRC6    | 0.73 | 0.19403  | 0.837 |
| C14orf79 | 0.73 | 0.194029 | 0.837 |
| C17orf77 | 0.73 | 0.19403  | 0.837 |
| C6orf106 | 0.73 | 0.194029 | 0.837 |
| CEACAM5  | 0.73 | 0.194029 | 0.837 |
| CHRD1    | 0.73 | 0.194029 | 0.837 |

|           |      |          |       |
|-----------|------|----------|-------|
| CXCL14    | 0.73 | 0.217335 | 0.848 |
| CYP46A1   | 0.73 | 0.194029 | 0.837 |
| ECE2      | 0.73 | 0.217335 | 0.848 |
| ELOVL5    | 0.73 | 0.194029 | 0.837 |
| ELP4      | 0.73 | 0.19403  | 0.837 |
| ERMN      | 0.73 | 0.19403  | 0.837 |
| ERVW-1    | 0.73 | 0.194029 | 0.837 |
| FAM105A   | 0.73 | 0.217335 | 0.848 |
| FNBP1L    | 0.73 | 0.194029 | 0.837 |
| HLA-A     | 0.73 | 0.194029 | 0.837 |
| HNRNPK    | 0.73 | 0.217335 | 0.848 |
| HTR4      | 0.73 | 0.19403  | 0.837 |
| ITGB6     | 0.73 | 0.194029 | 0.837 |
| KDM4A     | 0.73 | 0.194029 | 0.837 |
| MRGPRX3   | 0.73 | 0.19403  | 0.837 |
| MSMB      | 0.73 | 0.194029 | 0.837 |
| MYBL1     | 0.73 | 0.194029 | 0.837 |
| NHP2      | 0.73 | 0.19403  | 0.837 |
| OPN4      | 0.73 | 0.217335 | 0.848 |
| OR2J3     | 0.73 | 0.194029 | 0.837 |
| OR2T33    | 0.73 | 0.19403  | 0.837 |
| PRG3      | 0.73 | 0.194029 | 0.837 |
| PYDC1     | 0.73 | 0.19403  | 0.837 |
| RBFOX3    | 0.73 | 0.194029 | 0.837 |
| RBPM2     | 0.73 | 0.194029 | 0.837 |
| REV1      | 0.73 | 0.19403  | 0.837 |
| RFPL4B    | 0.73 | 0.243755 | 0.863 |
| RNF133    | 0.73 | 0.19403  | 0.837 |
| RPRD1A    | 0.73 | 0.194029 | 0.837 |
| RPSA      | 0.73 | 0.352004 | 0.904 |
| SAMD3     | 0.73 | 0.19403  | 0.837 |
| SFSWAP    | 0.73 | 0.217335 | 0.848 |
| SPATA1    | 0.73 | 0.19403  | 0.837 |
| STX10     | 0.73 | 0.194029 | 0.837 |
| TIMD4     | 0.73 | 0.194029 | 0.837 |
| TMEM225   | 0.73 | 0.194029 | 0.837 |
| TMEM245   | 0.73 | 0.194029 | 0.837 |
| TMEM62    | 0.73 | 0.194029 | 0.837 |
| TNFRSF10D | 0.73 | 0.19403  | 0.837 |
| TRIM29    | 0.73 | 0.194029 | 0.837 |
| UBA1      | 0.73 | 0.243756 | 0.863 |
| ZC3H7B    | 0.73 | 0.217335 | 0.848 |
| ZNF263    | 0.73 | 0.217334 | 0.848 |
| ZNF430    | 0.73 | 0.19403  | 0.837 |
| ACOT2     | 0.74 | 0.18817  | 0.833 |
| AKIP1     | 0.74 | 0.211254 | 0.846 |
| APOBEC3C  | 0.74 | 0.18817  | 0.833 |

|           |      |          |       |
|-----------|------|----------|-------|
| ATP2A3    | 0.74 | 0.18817  | 0.833 |
| ATXN3     | 0.74 | 0.18817  | 0.833 |
| BCL7A     | 0.74 | 0.211254 | 0.846 |
| C19orf38  | 0.74 | 0.18817  | 0.833 |
| CA5A      | 0.74 | 0.18817  | 0.833 |
| CCDC111   | 0.74 | 0.18817  | 0.833 |
| CCKAR     | 0.74 | 0.18817  | 0.833 |
| CDC25B    | 0.74 | 0.18817  | 0.833 |
| CEBPG     | 0.74 | 0.18817  | 0.833 |
| CILP      | 0.74 | 0.18817  | 0.833 |
| CLUAP1    | 0.74 | 0.18817  | 0.833 |
| CPLX4     | 0.74 | 0.18817  | 0.833 |
| E4F1      | 0.74 | 0.237529 | 0.859 |
| FANCG     | 0.74 | 0.211255 | 0.846 |
| FZD2      | 0.74 | 0.18817  | 0.833 |
| GABBR1    | 0.74 | 0.18817  | 0.833 |
| GMEB2     | 0.74 | 0.18817  | 0.833 |
| HSPA8     | 0.74 | 0.211255 | 0.846 |
| IAH1      | 0.74 | 0.18817  | 0.833 |
| IFT52     | 0.74 | 0.18817  | 0.833 |
| IGSF22    | 0.74 | 0.18817  | 0.833 |
| INPP5A    | 0.74 | 0.18817  | 0.833 |
| INTS1     | 0.74 | 0.237529 | 0.859 |
| ISG15     | 0.74 | 0.18817  | 0.833 |
| KDM5C     | 0.74 | 0.18817  | 0.833 |
| MALT1     | 0.74 | 0.18817  | 0.833 |
| MARCH4    | 0.74 | 0.211255 | 0.846 |
| MEF2BNB   | 0.74 | 0.18817  | 0.833 |
| MT1X      | 0.74 | 0.18817  | 0.833 |
| MTG1      | 0.74 | 0.211255 | 0.846 |
| NELL2     | 0.74 | 0.211255 | 0.846 |
| NREP      | 0.74 | 0.18817  | 0.833 |
| OCIAD2    | 0.74 | 0.18817  | 0.833 |
| OR2F2     | 0.74 | 0.18817  | 0.833 |
| PKIA      | 0.74 | 0.18817  | 0.833 |
| PNMA6C    | 0.74 | 0.18817  | 0.833 |
| RIC8B     | 0.74 | 0.18817  | 0.833 |
| RPL35     | 0.74 | 0.18817  | 0.833 |
| SCNN1D    | 0.74 | 0.18817  | 0.833 |
| SLC20A1   | 0.74 | 0.211254 | 0.846 |
| SLC25A35  | 0.74 | 0.18817  | 0.833 |
| SLC7A9    | 0.74 | 0.18817  | 0.833 |
| STK38     | 0.74 | 0.18817  | 0.833 |
| TBC1D5    | 0.74 | 0.18817  | 0.833 |
| TNFAIP8L2 | 0.74 | 0.18817  | 0.833 |
| TPSB2     | 0.74 | 0.268046 | 0.873 |
| ZNF426    | 0.74 | 0.211255 | 0.846 |

|          |      |          |       |
|----------|------|----------|-------|
| ABI3     | 0.75 | 0.182452 | 0.827 |
| AGT      | 0.75 | 0.182451 | 0.827 |
| ANKRD23  | 0.75 | 0.182452 | 0.827 |
| ATG4C    | 0.75 | 0.205365 | 0.845 |
| BBS5     | 0.75 | 0.182452 | 0.827 |
| C10orf54 | 0.75 | 0.182452 | 0.827 |
| C10orf62 | 0.75 | 0.182451 | 0.827 |
| C1orf192 | 0.75 | 0.182451 | 0.827 |
| CA5B     | 0.75 | 0.182452 | 0.827 |
| CABYR    | 0.75 | 0.182452 | 0.827 |
| CAMK1D   | 0.75 | 0.182452 | 0.827 |
| CCDC126  | 0.75 | 0.182452 | 0.827 |
| CDC14A   | 0.75 | 0.182452 | 0.827 |
| CDC14B   | 0.75 | 0.182451 | 0.827 |
| CETP     | 0.75 | 0.182452 | 0.827 |
| CLCN1    | 0.75 | 0.182452 | 0.827 |
| CSMD1    | 0.75 | 0.182452 | 0.827 |
| CSNK1G1  | 0.75 | 0.182452 | 0.827 |
| DENND5B  | 0.75 | 0.182452 | 0.827 |
| ELL3     | 0.75 | 0.182451 | 0.827 |
| FANCF    | 0.75 | 0.182452 | 0.827 |
| FDXR     | 0.75 | 0.182452 | 0.827 |
| FIGLA    | 0.75 | 0.182452 | 0.827 |
| FMR1     | 0.75 | 0.205364 | 0.845 |
| FNIP2    | 0.75 | 0.182452 | 0.827 |
| GDE1     | 0.75 | 0.231459 | 0.854 |
| GJB2     | 0.75 | 0.182452 | 0.827 |
| GTF2F1   | 0.75 | 0.205364 | 0.845 |
| HAMP     | 0.75 | 0.205364 | 0.845 |
| HLF      | 0.75 | 0.182452 | 0.827 |
| KCNC3    | 0.75 | 0.182452 | 0.827 |
| KCNH2    | 0.75 | 0.182451 | 0.827 |
| KRTAP5-4 | 0.75 | 0.231459 | 0.854 |
| MUL1     | 0.75 | 0.205364 | 0.845 |
| NMI      | 0.75 | 0.205364 | 0.845 |
| OR4D10   | 0.75 | 0.182451 | 0.827 |
| PAQR6    | 0.75 | 0.205364 | 0.845 |
| RABGEF1  | 0.75 | 0.205364 | 0.845 |
| RAP1GDS1 | 0.75 | 0.182451 | 0.827 |
| RNASE3   | 0.75 | 0.182451 | 0.827 |
| SAFB     | 0.75 | 0.182452 | 0.827 |
| SCAMP2   | 0.75 | 0.182451 | 0.827 |
| SPRYD4   | 0.75 | 0.182452 | 0.827 |
| SRP54    | 0.75 | 0.205364 | 0.845 |
| SUCLG1   | 0.75 | 0.182451 | 0.827 |
| TAS2R5   | 0.75 | 0.231459 | 0.854 |
| TBRG1    | 0.75 | 0.182451 | 0.827 |

|          |      |          |       |
|----------|------|----------|-------|
| TGFBRAP1 | 0.75 | 0.205364 | 0.845 |
| ADPRHL2  | 0.76 | 0.176848 | 0.818 |
| ADRA1D   | 0.76 | 0.176848 | 0.818 |
| AXIN1    | 0.76 | 0.199564 | 0.838 |
| C17orf75 | 0.76 | 0.176847 | 0.818 |
| C19orf82 | 0.76 | 0.199564 | 0.838 |
| C3orf33  | 0.76 | 0.176847 | 0.818 |
| CARS2    | 0.76 | 0.176848 | 0.818 |
| CCDC150  | 0.76 | 0.176848 | 0.818 |
| CCDC17   | 0.76 | 0.176848 | 0.818 |
| CLDN11   | 0.76 | 0.176848 | 0.818 |
| CLEC4D   | 0.76 | 0.176848 | 0.818 |
| CNPY3    | 0.76 | 0.176848 | 0.818 |
| COPS3    | 0.76 | 0.176848 | 0.818 |
| CRYBG3   | 0.76 | 0.176848 | 0.818 |
| CSF2     | 0.76 | 0.176848 | 0.818 |
| CTRC     | 0.76 | 0.176848 | 0.818 |
| CYP4A11  | 0.76 | 0.176848 | 0.818 |
| FAM134C  | 0.76 | 0.176848 | 0.818 |
| GCM1     | 0.76 | 0.176847 | 0.818 |
| GSTO2    | 0.76 | 0.176848 | 0.818 |
| INSIG2   | 0.76 | 0.176848 | 0.818 |
| ITGAL    | 0.76 | 0.176848 | 0.818 |
| KRT32    | 0.76 | 0.176848 | 0.818 |
| LYSMD4   | 0.76 | 0.176848 | 0.818 |
| MTRNR2L8 | 0.76 | 0.225498 | 0.849 |
| MUC22    | 0.76 | 0.176848 | 0.818 |
| NAA50    | 0.76 | 0.176848 | 0.818 |
| NARS2    | 0.76 | 0.176847 | 0.818 |
| NDUFB8   | 0.76 | 0.199564 | 0.838 |
| OR4A5    | 0.76 | 0.176848 | 0.818 |
| PDCL3    | 0.76 | 0.176847 | 0.818 |
| PLEKHA8  | 0.76 | 0.176848 | 0.818 |
| POLG     | 0.76 | 0.176847 | 0.818 |
| PPP1R11  | 0.76 | 0.199563 | 0.838 |
| RIMBP2   | 0.76 | 0.199564 | 0.838 |
| SERPINB9 | 0.76 | 0.176848 | 0.818 |
| SGCA     | 0.76 | 0.176847 | 0.818 |
| SLC16A1  | 0.76 | 0.199564 | 0.838 |
| SMG9     | 0.76 | 0.199563 | 0.838 |
| SNORD95  | 0.76 | 0.176848 | 0.818 |
| SUN5     | 0.76 | 0.176847 | 0.818 |
| TICRR    | 0.76 | 0.199563 | 0.838 |
| TRIP10   | 0.76 | 0.199563 | 0.838 |
| TSPY1    | 0.76 | 0.176847 | 0.818 |
| VPS35    | 0.76 | 0.176847 | 0.818 |
| ZKSCAN4  | 0.76 | 0.176848 | 0.818 |

|          |      |          |       |
|----------|------|----------|-------|
| ZNF250   | 0.76 | 0.176848 | 0.818 |
| ZNF503   | 0.76 | 0.176848 | 0.818 |
| ZNF510   | 0.76 | 0.176848 | 0.818 |
| ZNF701   | 0.76 | 0.176848 | 0.818 |
| AGRP     | 0.77 | 0.17138  | 0.812 |
| AIMP1    | 0.77 | 0.171381 | 0.812 |
| AK4      | 0.77 | 0.171381 | 0.812 |
| ANGPTL4  | 0.77 | 0.171381 | 0.812 |
| ANKFY1   | 0.77 | 0.17138  | 0.812 |
| APOH     | 0.77 | 0.17138  | 0.812 |
| ARGFX    | 0.77 | 0.171381 | 0.812 |
| ARL8B    | 0.77 | 0.171381 | 0.812 |
| BST1     | 0.77 | 0.171381 | 0.812 |
| C11orf82 | 0.77 | 0.171381 | 0.812 |
| C11orf91 | 0.77 | 0.171381 | 0.812 |
| C1orf64  | 0.77 | 0.171381 | 0.812 |
| CASP7    | 0.77 | 0.193975 | 0.837 |
| COMMD1   | 0.77 | 0.171381 | 0.812 |
| CORO6    | 0.77 | 0.17138  | 0.812 |
| DNAJB14  | 0.77 | 0.171381 | 0.812 |
| DPP6     | 0.77 | 0.171381 | 0.812 |
| EFHB     | 0.77 | 0.171381 | 0.812 |
| EFNB3    | 0.77 | 0.193975 | 0.837 |
| EI24     | 0.77 | 0.219646 | 0.849 |
| EPAS1    | 0.77 | 0.193974 | 0.837 |
| EPN3     | 0.77 | 0.193974 | 0.837 |
| EVL      | 0.77 | 0.171381 | 0.812 |
| FER      | 0.77 | 0.171381 | 0.812 |
| FER1L5   | 0.77 | 0.171381 | 0.812 |
| FLYWCH1  | 0.77 | 0.17138  | 0.812 |
| FUK      | 0.77 | 0.171381 | 0.812 |
| GAB4     | 0.77 | 0.171381 | 0.812 |
| HAGH     | 0.77 | 0.17138  | 0.812 |
| HEATR1   | 0.77 | 0.193974 | 0.837 |
| HSD17B7  | 0.77 | 0.171381 | 0.812 |
| IFNL3    | 0.77 | 0.171381 | 0.812 |
| IL13RA2  | 0.77 | 0.17138  | 0.812 |
| IL27     | 0.77 | 0.171381 | 0.812 |
| MED17    | 0.77 | 0.193974 | 0.837 |
| MED27    | 0.77 | 0.171381 | 0.812 |
| MT1M     | 0.77 | 0.171381 | 0.812 |
| NEDD4    | 0.77 | 0.171381 | 0.812 |
| NEK6     | 0.77 | 0.193974 | 0.837 |
| NF2      | 0.77 | 0.171381 | 0.812 |
| NLK      | 0.77 | 0.219646 | 0.849 |
| NNMT     | 0.77 | 0.171381 | 0.812 |
| OR5J2    | 0.77 | 0.171381 | 0.812 |

|            |      |          |       |
|------------|------|----------|-------|
| OR6C4      | 0.77 | 0.171381 | 0.812 |
| OR8G5      | 0.77 | 0.171381 | 0.812 |
| P2RY1      | 0.77 | 0.171381 | 0.812 |
| PEX11A     | 0.77 | 0.171381 | 0.812 |
| PRNP       | 0.77 | 0.171381 | 0.812 |
| PRR12      | 0.77 | 0.17138  | 0.812 |
| PSMC4      | 0.77 | 0.193974 | 0.837 |
| QPCTL      | 0.77 | 0.17138  | 0.812 |
| RBMV1B     | 0.77 | 0.17138  | 0.812 |
| SEL1L      | 0.77 | 0.219646 | 0.849 |
| SIGLEC6    | 0.77 | 0.17138  | 0.812 |
| SP2        | 0.77 | 0.171381 | 0.812 |
| SPATA4     | 0.77 | 0.171381 | 0.812 |
| SUN1       | 0.77 | 0.17138  | 0.812 |
| TANC1      | 0.77 | 0.193974 | 0.837 |
| TAS2R7     | 0.77 | 0.171381 | 0.812 |
| TMEM8B     | 0.77 | 0.171381 | 0.812 |
| TMEM98     | 0.77 | 0.17138  | 0.812 |
| USH1G      | 0.77 | 0.171381 | 0.812 |
| ZNF695     | 0.77 | 0.171381 | 0.812 |
| ZNRF1      | 0.77 | 0.17138  | 0.812 |
| AKR1B1     | 0.78 | 0.166076 | 0.81  |
| AQP3       | 0.78 | 0.166076 | 0.81  |
| ATR        | 0.78 | 0.213911 | 0.848 |
| BHMT       | 0.78 | 0.188433 | 0.833 |
| BTN3A3     | 0.78 | 0.166075 | 0.81  |
| CALM3      | 0.78 | 0.166076 | 0.81  |
| CIT        | 0.78 | 0.166075 | 0.81  |
| COMMD9     | 0.78 | 0.166075 | 0.81  |
| COX18      | 0.78 | 0.166076 | 0.81  |
| DPF3       | 0.78 | 0.166076 | 0.81  |
| EIF4H      | 0.78 | 0.166076 | 0.81  |
| ERGIC1     | 0.78 | 0.166075 | 0.81  |
| F5         | 0.78 | 0.188433 | 0.833 |
| FOXO3      | 0.78 | 0.166076 | 0.81  |
| GABBR2     | 0.78 | 0.166075 | 0.81  |
| GALNT3     | 0.78 | 0.166075 | 0.81  |
| GDF15      | 0.78 | 0.166075 | 0.81  |
| GOT2       | 0.78 | 0.166075 | 0.81  |
| IBA57      | 0.78 | 0.166076 | 0.81  |
| KIN        | 0.78 | 0.188433 | 0.833 |
| KRTAP10-11 | 0.78 | 0.166075 | 0.81  |
| MROH8      | 0.78 | 0.213911 | 0.848 |
| MRPS28     | 0.78 | 0.166076 | 0.81  |
| MYOT       | 0.78 | 0.166075 | 0.81  |
| NUMB       | 0.78 | 0.188432 | 0.833 |
| OR8H2      | 0.78 | 0.166075 | 0.81  |

|          |      |          |       |
|----------|------|----------|-------|
| PCM1     | 0.78 | 0.213911 | 0.848 |
| PFKL     | 0.78 | 0.166075 | 0.81  |
| PIK3CG   | 0.78 | 0.188432 | 0.833 |
| PLA2G4B  | 0.78 | 0.166076 | 0.81  |
| PLEKHM1  | 0.78 | 0.188433 | 0.833 |
| PMAIP1   | 0.78 | 0.166076 | 0.81  |
| PNPT1    | 0.78 | 0.213911 | 0.848 |
| POF1B    | 0.78 | 0.166075 | 0.81  |
| ROPN1    | 0.78 | 0.166076 | 0.81  |
| RPS4X    | 0.78 | 0.188433 | 0.833 |
| RRH      | 0.78 | 0.166076 | 0.81  |
| S100G    | 0.78 | 0.213911 | 0.848 |
| SHBG     | 0.78 | 0.166076 | 0.81  |
| SLC51B   | 0.78 | 0.166076 | 0.81  |
| SNAP25   | 0.78 | 0.166076 | 0.81  |
| SNRPA1   | 0.78 | 0.166075 | 0.81  |
| SOX10    | 0.78 | 0.166076 | 0.81  |
| TCTE1    | 0.78 | 0.166075 | 0.81  |
| TEX10    | 0.78 | 0.166075 | 0.81  |
| TMEM221  | 0.78 | 0.166075 | 0.81  |
| TPRG1L   | 0.78 | 0.166076 | 0.81  |
| TXNDC15  | 0.78 | 0.166075 | 0.81  |
| UBE2K    | 0.78 | 0.166075 | 0.81  |
| USP30    | 0.78 | 0.166075 | 0.81  |
| VPREB3   | 0.78 | 0.166075 | 0.81  |
| ZNF615   | 0.78 | 0.166076 | 0.81  |
| AASS     | 0.79 | 0.160916 | 0.806 |
| AGL      | 0.79 | 0.160915 | 0.806 |
| ANKRD30A | 0.79 | 0.160916 | 0.806 |
| ARPC2    | 0.79 | 0.160916 | 0.806 |
| BACE1    | 0.79 | 0.160916 | 0.806 |
| C1orf85  | 0.79 | 0.160916 | 0.806 |
| CLPTM1L  | 0.79 | 0.160916 | 0.806 |
| CNBD1    | 0.79 | 0.160916 | 0.806 |
| EMC1     | 0.79 | 0.160916 | 0.806 |
| GPT      | 0.79 | 0.160916 | 0.806 |
| HLA-B    | 0.79 | 0.208301 | 0.846 |
| HOXA5    | 0.79 | 0.160916 | 0.806 |
| MAP7D1   | 0.79 | 0.183009 | 0.827 |
| MATN4    | 0.79 | 0.160916 | 0.806 |
| MMP10    | 0.79 | 0.18301  | 0.827 |
| MROH9    | 0.79 | 0.160916 | 0.806 |
| MRPL17   | 0.79 | 0.273046 | 0.878 |
| MTIF3    | 0.79 | 0.18301  | 0.827 |
| MYO5A    | 0.79 | 0.183009 | 0.827 |
| NLRX1    | 0.79 | 0.18301  | 0.827 |
| NPHP1    | 0.79 | 0.160915 | 0.806 |

|          |      |          |       |
|----------|------|----------|-------|
| NPL      | 0.79 | 0.160916 | 0.806 |
| OR6S1    | 0.79 | 0.160916 | 0.806 |
| OTUD5    | 0.79 | 0.160916 | 0.806 |
| OXLD1    | 0.79 | 0.183009 | 0.827 |
| PBX1     | 0.79 | 0.18301  | 0.827 |
| PDF      | 0.79 | 0.160916 | 0.806 |
| PLA2G3   | 0.79 | 0.160916 | 0.806 |
| POM121L2 | 0.79 | 0.160916 | 0.806 |
| PRLHR    | 0.79 | 0.160916 | 0.806 |
| PRR18    | 0.79 | 0.160915 | 0.806 |
| RIC8A    | 0.79 | 0.160916 | 0.806 |
| SAP18    | 0.79 | 0.18301  | 0.827 |
| SGMS2    | 0.79 | 0.160916 | 0.806 |
| SGPL1    | 0.79 | 0.160916 | 0.806 |
| SLC25A10 | 0.79 | 0.160916 | 0.806 |
| SLC43A3  | 0.79 | 0.160916 | 0.806 |
| SMOC1    | 0.79 | 0.160916 | 0.806 |
| SRSF9    | 0.79 | 0.160916 | 0.806 |
| TMEM87A  | 0.79 | 0.160916 | 0.806 |
| TPM1     | 0.79 | 0.160916 | 0.806 |
| TRAM1    | 0.79 | 0.160915 | 0.806 |
| TRPT1    | 0.79 | 0.160916 | 0.806 |
| TTC12    | 0.79 | 0.18301  | 0.827 |
| TTC29    | 0.79 | 0.160916 | 0.806 |
| ZNF114   | 0.79 | 0.160916 | 0.806 |
| ZNF614   | 0.79 | 0.160916 | 0.806 |
| ABHD8    | 0.8  | 0.155842 | 0.803 |
| ADAMTS14 | 0.8  | 0.155843 | 0.803 |
| AJAP1    | 0.8  | 0.177711 | 0.82  |
| ANKRD2   | 0.8  | 0.155843 | 0.803 |
| B3GNT1   | 0.8  | 0.155843 | 0.803 |
| BIRC3    | 0.8  | 0.155843 | 0.803 |
| C10orf67 | 0.8  | 0.17771  | 0.82  |
| COX4I2   | 0.8  | 0.155843 | 0.803 |
| DACT1    | 0.8  | 0.155843 | 0.803 |
| EIF2S3   | 0.8  | 0.20275  | 0.845 |
| EQTN     | 0.8  | 0.155843 | 0.803 |
| GFY      | 0.8  | 0.155842 | 0.803 |
| GGA2     | 0.8  | 0.155842 | 0.803 |
| GLB1L    | 0.8  | 0.155843 | 0.803 |
| GNPAT    | 0.8  | 0.155843 | 0.803 |
| HSF2     | 0.8  | 0.155843 | 0.803 |
| LAPTM4A  | 0.8  | 0.155842 | 0.803 |
| LASP1    | 0.8  | 0.17771  | 0.82  |
| LIME1    | 0.8  | 0.155843 | 0.803 |
| LRRC19   | 0.8  | 0.155843 | 0.803 |
| MSR1     | 0.8  | 0.202751 | 0.845 |

|          |      |          |       |
|----------|------|----------|-------|
| NCLN     | 0.8  | 0.177711 | 0.82  |
| NSUN4    | 0.8  | 0.155843 | 0.803 |
| NUB1     | 0.8  | 0.155843 | 0.803 |
| OR2T3    | 0.8  | 0.155842 | 0.803 |
| OSTC     | 0.8  | 0.155843 | 0.803 |
| PCDHGB2  | 0.8  | 0.155843 | 0.803 |
| PIGB     | 0.8  | 0.202751 | 0.845 |
| PLBD2    | 0.8  | 0.155843 | 0.803 |
| POLR1A   | 0.8  | 0.267217 | 0.873 |
| PPIB     | 0.8  | 0.155843 | 0.803 |
| PPP1R37  | 0.8  | 0.17771  | 0.82  |
| RASL10A  | 0.8  | 0.202751 | 0.845 |
| SERPINB1 | 0.8  | 0.155842 | 0.803 |
| SLC12A3  | 0.8  | 0.155843 | 0.803 |
| SLC16A9  | 0.8  | 0.155842 | 0.803 |
| SPINK2   | 0.8  | 0.155842 | 0.803 |
| SQRDL    | 0.8  | 0.155843 | 0.803 |
| SUSD3    | 0.8  | 0.155842 | 0.803 |
| THOC2    | 0.8  | 0.177711 | 0.82  |
| TKTL1    | 0.8  | 0.155842 | 0.803 |
| TMEM242  | 0.8  | 0.155842 | 0.803 |
| TMSB10   | 0.8  | 0.155843 | 0.803 |
| TSPAN33  | 0.8  | 0.155843 | 0.803 |
| U2AF1    | 0.8  | 0.232317 | 0.854 |
| VDAC1    | 0.8  | 0.155843 | 0.803 |
| WDR97    | 0.8  | 0.17771  | 0.82  |
| ZNF576   | 0.8  | 0.155842 | 0.803 |
| A1BG     | 0.81 | 0.150901 | 0.796 |
| ACRV1    | 0.81 | 0.150901 | 0.796 |
| ADPGK    | 0.81 | 0.150901 | 0.796 |
| ANO2     | 0.81 | 0.197337 | 0.838 |
| ARF5     | 0.81 | 0.1509   | 0.796 |
| ARHGDIA  | 0.81 | 0.150901 | 0.796 |
| ARID2    | 0.81 | 0.150901 | 0.796 |
| C18orf8  | 0.81 | 0.150901 | 0.796 |
| C3orf79  | 0.81 | 0.150901 | 0.796 |
| CALR3    | 0.81 | 0.150901 | 0.796 |
| CCDC83   | 0.81 | 0.172509 | 0.814 |
| CLLU1    | 0.81 | 0.172509 | 0.814 |
| EHD2     | 0.81 | 0.150901 | 0.796 |
| EIF2AK2  | 0.81 | 0.150901 | 0.796 |
| EMILIN3  | 0.81 | 0.1509   | 0.796 |
| EMR2     | 0.81 | 0.197337 | 0.838 |
| FAM221A  | 0.81 | 0.1509   | 0.796 |
| FLRT3    | 0.81 | 0.150901 | 0.796 |
| FSHB     | 0.81 | 0.1509   | 0.796 |
| GOLGA8H  | 0.81 | 0.261456 | 0.873 |

|          |      |          |       |
|----------|------|----------|-------|
| HOXD12   | 0.81 | 0.150901 | 0.796 |
| HSPBAP1  | 0.81 | 0.172509 | 0.814 |
| KCNRG    | 0.81 | 0.1509   | 0.796 |
| KIAA1279 | 0.81 | 0.150901 | 0.796 |
| KRT86    | 0.81 | 0.1509   | 0.796 |
| LPIN3    | 0.81 | 0.150901 | 0.796 |
| LTB      | 0.81 | 0.150901 | 0.796 |
| NHEJ1    | 0.81 | 0.150901 | 0.796 |
| NPIPB9   | 0.81 | 0.1509   | 0.796 |
| NRIP3    | 0.81 | 0.150901 | 0.796 |
| OR6F1    | 0.81 | 0.1509   | 0.796 |
| PLAC1    | 0.81 | 0.150901 | 0.796 |
| PTBP2    | 0.81 | 0.150901 | 0.796 |
| RBMS2    | 0.81 | 0.1509   | 0.796 |
| SCMH1    | 0.81 | 0.172509 | 0.814 |
| SEBOX    | 0.81 | 0.1509   | 0.796 |
| SSFA2    | 0.81 | 0.150901 | 0.796 |
| SYT10    | 0.81 | 0.150901 | 0.796 |
| TCEAL4   | 0.81 | 0.226669 | 0.853 |
| TCHHL1   | 0.81 | 0.1509   | 0.796 |
| TIA1     | 0.81 | 0.150901 | 0.796 |
| TIMM13   | 0.81 | 0.172509 | 0.814 |
| TOMM70A  | 0.81 | 0.1509   | 0.796 |
| TRAF3    | 0.81 | 0.1509   | 0.796 |
| YWHAG    | 0.81 | 0.150901 | 0.796 |
| ZC3HAV1  | 0.81 | 0.1509   | 0.796 |
| ZFC3H1   | 0.81 | 0.172509 | 0.814 |
| AFTPH    | 0.82 | 0.146033 | 0.788 |
| AK7      | 0.82 | 0.146033 | 0.788 |
| B3GALNT1 | 0.82 | 0.146034 | 0.788 |
| BOD1L1   | 0.82 | 0.146033 | 0.788 |
| C1orf174 | 0.82 | 0.146033 | 0.788 |
| C1QL1    | 0.82 | 0.146033 | 0.788 |
| C5orf63  | 0.82 | 0.167401 | 0.812 |
| CDC7     | 0.82 | 0.146034 | 0.788 |
| CDH19    | 0.82 | 0.146034 | 0.788 |
| CDKN2C   | 0.82 | 0.146034 | 0.788 |
| CTNNBIP1 | 0.82 | 0.146033 | 0.788 |
| DNAJC18  | 0.82 | 0.146033 | 0.788 |
| DNLZ     | 0.82 | 0.146033 | 0.788 |
| DNM2     | 0.82 | 0.297556 | 0.886 |
| EIF3D    | 0.82 | 0.146033 | 0.788 |
| ERAP2    | 0.82 | 0.146033 | 0.788 |
| EVI2A    | 0.82 | 0.146033 | 0.788 |
| FAM19A3  | 0.82 | 0.146033 | 0.788 |
| FAM65B   | 0.82 | 0.146033 | 0.788 |
| FAM81A   | 0.82 | 0.146033 | 0.788 |

|           |      |          |       |
|-----------|------|----------|-------|
| FUNDC2    | 0.82 | 0.146033 | 0.788 |
| GPRIN2    | 0.82 | 0.146034 | 0.788 |
| KCNMB4    | 0.82 | 0.146033 | 0.788 |
| KIAA0922  | 0.82 | 0.146034 | 0.788 |
| KIFAP3    | 0.82 | 0.146033 | 0.788 |
| KRTAP10-7 | 0.82 | 0.146033 | 0.788 |
| LRRC31    | 0.82 | 0.146033 | 0.788 |
| MS4A5     | 0.82 | 0.146033 | 0.788 |
| MYL7      | 0.82 | 0.146033 | 0.788 |
| NBPF8     | 0.82 | 0.221168 | 0.849 |
| NFS1      | 0.82 | 0.255784 | 0.87  |
| OAT       | 0.82 | 0.146033 | 0.788 |
| OGT       | 0.82 | 0.221168 | 0.849 |
| OR5AN1    | 0.82 | 0.146033 | 0.788 |
| PIK3C3    | 0.82 | 0.167401 | 0.812 |
| PPBP      | 0.82 | 0.146033 | 0.788 |
| PPFIA1    | 0.82 | 0.146033 | 0.788 |
| RAC2      | 0.82 | 0.1674   | 0.812 |
| RPS28     | 0.82 | 0.297556 | 0.886 |
| SCN4A     | 0.82 | 0.192094 | 0.837 |
| SEPT2     | 0.82 | 0.146033 | 0.788 |
| SERF2     | 0.82 | 0.146033 | 0.788 |
| SMPDL3B   | 0.82 | 0.146033 | 0.788 |
| ST6GALNAC | 0.82 | 0.167401 | 0.812 |
| TCEB3C    | 0.82 | 0.146033 | 0.788 |
| TCTN3     | 0.82 | 0.167401 | 0.812 |
| THAP8     | 0.82 | 0.146033 | 0.788 |
| TMEM246   | 0.82 | 0.167401 | 0.812 |
| USP4      | 0.82 | 0.146033 | 0.788 |
| YIPF3     | 0.82 | 0.146033 | 0.788 |
| ZMAT3     | 0.82 | 0.146033 | 0.788 |
| ZNF222    | 0.82 | 0.146034 | 0.788 |
| ADCY10    | 0.83 | 0.141336 | 0.784 |
| ALKBH3    | 0.83 | 0.141337 | 0.784 |
| AMTN      | 0.83 | 0.141337 | 0.784 |
| AOC2      | 0.83 | 0.162448 | 0.81  |
| ATF7      | 0.83 | 0.162448 | 0.81  |
| BBS10     | 0.83 | 0.141337 | 0.784 |
| BMP7      | 0.83 | 0.141337 | 0.784 |
| CADPS2    | 0.83 | 0.141337 | 0.784 |
| CDS1      | 0.83 | 0.141337 | 0.784 |
| CHST7     | 0.83 | 0.141337 | 0.784 |
| CLEC6A    | 0.83 | 0.141336 | 0.784 |
| CNGB1     | 0.83 | 0.18688  | 0.833 |
| CYP4Z1    | 0.83 | 0.141337 | 0.784 |
| DEFB116   | 0.83 | 0.141337 | 0.784 |
| EML4      | 0.83 | 0.141337 | 0.784 |

|            |      |          |       |
|------------|------|----------|-------|
| FAM170A    | 0.83 | 0.141337 | 0.784 |
| GOLGA8J    | 0.83 | 0.141337 | 0.784 |
| HCN2       | 0.83 | 0.141337 | 0.784 |
| HEXIM2     | 0.83 | 0.162447 | 0.81  |
| HIST1H1T   | 0.83 | 0.141337 | 0.784 |
| ICA1       | 0.83 | 0.141336 | 0.784 |
| ISY1-RAB43 | 0.83 | 0.215753 | 0.848 |
| LGALS1     | 0.83 | 0.141337 | 0.784 |
| LRRC3C     | 0.83 | 0.141337 | 0.784 |
| MYO3A      | 0.83 | 0.141336 | 0.784 |
| NDFIP1     | 0.83 | 0.141336 | 0.784 |
| NPM3       | 0.83 | 0.162448 | 0.81  |
| PBK        | 0.83 | 0.141337 | 0.784 |
| PCDH12     | 0.83 | 0.141337 | 0.784 |
| PCED1A     | 0.83 | 0.162448 | 0.81  |
| POGZ       | 0.83 | 0.141337 | 0.784 |
| PPP2R2A    | 0.83 | 0.141337 | 0.784 |
| PRDM7      | 0.83 | 0.141337 | 0.784 |
| PSMD14     | 0.83 | 0.291876 | 0.884 |
| PTH2R      | 0.83 | 0.141336 | 0.784 |
| SEC31B     | 0.83 | 0.141337 | 0.784 |
| SH3D21     | 0.83 | 0.141337 | 0.784 |
| SLC4A7     | 0.83 | 0.141337 | 0.784 |
| SLC9C2     | 0.83 | 0.141337 | 0.784 |
| SYT6       | 0.83 | 0.162448 | 0.81  |
| TEX12      | 0.83 | 0.18688  | 0.833 |
| TM6SF2     | 0.83 | 0.18688  | 0.833 |
| TMED7-TIC/ | 0.83 | 0.141337 | 0.784 |
| TMEM127    | 0.83 | 0.141337 | 0.784 |
| TMEM59     | 0.83 | 0.162447 | 0.81  |
| TNFRSF10B  | 0.83 | 0.141337 | 0.784 |
| TOMM34     | 0.83 | 0.141337 | 0.784 |
| TRIM38     | 0.83 | 0.141337 | 0.784 |
| TSPAN1     | 0.83 | 0.141337 | 0.784 |
| TSPY8      | 0.83 | 0.341841 | 0.904 |
| YME1L1     | 0.83 | 0.141336 | 0.784 |
| ZSWIM1     | 0.83 | 0.141337 | 0.784 |
| ABO        | 0.84 | 0.210406 | 0.846 |
| ANKRD27    | 0.84 | 0.136799 | 0.779 |
| C9orf171   | 0.84 | 0.136798 | 0.779 |
| CCDC58     | 0.84 | 0.157529 | 0.806 |
| CEP97      | 0.84 | 0.136799 | 0.779 |
| CHST4      | 0.84 | 0.136798 | 0.779 |
| CSNK1A1    | 0.84 | 0.15753  | 0.806 |
| E2F3       | 0.84 | 0.15753  | 0.806 |
| FAM92B     | 0.84 | 0.136798 | 0.779 |
| FBXO17     | 0.84 | 0.136799 | 0.779 |

|          |      |          |       |
|----------|------|----------|-------|
| FKBP15   | 0.84 | 0.136798 | 0.779 |
| GALT     | 0.84 | 0.136799 | 0.779 |
| HMBS     | 0.84 | 0.15753  | 0.806 |
| IFI44L   | 0.84 | 0.136799 | 0.779 |
| LMO4     | 0.84 | 0.136798 | 0.779 |
| LPCAT4   | 0.84 | 0.136799 | 0.779 |
| LPIN2    | 0.84 | 0.136798 | 0.779 |
| MMRN2    | 0.84 | 0.136798 | 0.779 |
| MOB1B    | 0.84 | 0.136799 | 0.779 |
| MRPL30   | 0.84 | 0.15753  | 0.806 |
| MYB      | 0.84 | 0.244775 | 0.863 |
| NPR1     | 0.84 | 0.136798 | 0.779 |
| NPTX1    | 0.84 | 0.136799 | 0.779 |
| NQO1     | 0.84 | 0.15753  | 0.806 |
| NSUN3    | 0.84 | 0.136798 | 0.779 |
| OAS2     | 0.84 | 0.136798 | 0.779 |
| OR8U8    | 0.84 | 0.244775 | 0.863 |
| PEX11B   | 0.84 | 0.136798 | 0.779 |
| PITX2    | 0.84 | 0.15753  | 0.806 |
| POLR3B   | 0.84 | 0.136798 | 0.779 |
| RCN1     | 0.84 | 0.136798 | 0.779 |
| RPL30    | 0.84 | 0.336248 | 0.904 |
| SELT     | 0.84 | 0.136798 | 0.779 |
| SEMA6D   | 0.84 | 0.136798 | 0.779 |
| SIGLEC15 | 0.84 | 0.136798 | 0.779 |
| SIPA1    | 0.84 | 0.15753  | 0.806 |
| SPIN2A   | 0.84 | 0.157529 | 0.806 |
| TMED4    | 0.84 | 0.136798 | 0.779 |
| TMEM189  | 0.84 | 0.136798 | 0.779 |
| TNFRSF17 | 0.84 | 0.136798 | 0.779 |
| TNFSF10  | 0.84 | 0.136798 | 0.779 |
| TP53BP2  | 0.84 | 0.15753  | 0.806 |
| WDR52    | 0.84 | 0.136798 | 0.779 |
| ZNF846   | 0.84 | 0.136798 | 0.779 |
| AASDHPPT | 0.85 | 0.132319 | 0.767 |
| ADAMTS5  | 0.85 | 0.132319 | 0.767 |
| AGTR1    | 0.85 | 0.13232  | 0.767 |
| C19orf33 | 0.85 | 0.132319 | 0.767 |
| C7orf41  | 0.85 | 0.13232  | 0.767 |
| CD200R1  | 0.85 | 0.132319 | 0.767 |
| CEBPE    | 0.85 | 0.13232  | 0.767 |
| CLDN16   | 0.85 | 0.132319 | 0.767 |
| CNOT1    | 0.85 | 0.15281  | 0.803 |
| EFCAB11  | 0.85 | 0.132319 | 0.767 |
| ELMOD2   | 0.85 | 0.13232  | 0.767 |
| FOXP3    | 0.85 | 0.13232  | 0.767 |
| GNAQ     | 0.85 | 0.13232  | 0.767 |

|           |      |          |       |
|-----------|------|----------|-------|
| GPR32     | 0.85 | 0.13232  | 0.767 |
| H2AFX     | 0.85 | 0.15281  | 0.803 |
| HIST1H2AD | 0.85 | 0.132319 | 0.767 |
| ICAM4     | 0.85 | 0.132319 | 0.767 |
| ITGA2B    | 0.85 | 0.15281  | 0.803 |
| LSAMP     | 0.85 | 0.13232  | 0.767 |
| MS4A15    | 0.85 | 0.132319 | 0.767 |
| NLGN4Y    | 0.85 | 0.13232  | 0.767 |
| OSBPL7    | 0.85 | 0.13232  | 0.767 |
| OVOL1     | 0.85 | 0.132319 | 0.767 |
| PLN       | 0.85 | 0.280776 | 0.88  |
| PLS1      | 0.85 | 0.132319 | 0.767 |
| PPFIBP2   | 0.85 | 0.15281  | 0.803 |
| PSMD7     | 0.85 | 0.176824 | 0.818 |
| RBL1      | 0.85 | 0.13232  | 0.767 |
| RHOH      | 0.85 | 0.132319 | 0.767 |
| RPUSD4    | 0.85 | 0.13232  | 0.767 |
| TBC1D21   | 0.85 | 0.13232  | 0.767 |
| TRIT1     | 0.85 | 0.132319 | 0.767 |
| TSPAN7    | 0.85 | 0.132319 | 0.767 |
| UBE2G1    | 0.85 | 0.132319 | 0.767 |
| WFDC8     | 0.85 | 0.13232  | 0.767 |
| ZBTB44    | 0.85 | 0.13232  | 0.767 |
| ZNF26     | 0.85 | 0.152811 | 0.803 |
| ZNF513    | 0.85 | 0.13232  | 0.767 |
| ACPP      | 0.86 | 0.127963 | 0.76  |
| ANKRD20A1 | 0.86 | 0.127963 | 0.76  |
| BARHL1    | 0.86 | 0.127963 | 0.76  |
| CCDC93    | 0.86 | 0.127963 | 0.76  |
| CD302     | 0.86 | 0.127963 | 0.76  |
| CDC6      | 0.86 | 0.171982 | 0.814 |
| CLEC17A   | 0.86 | 0.127963 | 0.76  |
| CLTA      | 0.86 | 0.127963 | 0.76  |
| COL2A1    | 0.86 | 0.127963 | 0.76  |
| COMMD3-BI | 0.86 | 0.127963 | 0.76  |
| CRISP3    | 0.86 | 0.127963 | 0.76  |
| DROSHA    | 0.86 | 0.171982 | 0.814 |
| ENTPD1    | 0.86 | 0.127963 | 0.76  |
| EPS15     | 0.86 | 0.127963 | 0.76  |
| FAM13B    | 0.86 | 0.127963 | 0.76  |
| GALK2     | 0.86 | 0.127963 | 0.76  |
| GALM      | 0.86 | 0.127963 | 0.76  |
| GALNT10   | 0.86 | 0.148162 | 0.796 |
| GALNT4    | 0.86 | 0.127963 | 0.76  |
| HEXDC     | 0.86 | 0.127963 | 0.76  |
| HSBP1L1   | 0.86 | 0.234091 | 0.859 |
| HSCB      | 0.86 | 0.127963 | 0.76  |

|           |      |          |       |
|-----------|------|----------|-------|
| IFNAR2    | 0.86 | 0.127963 | 0.76  |
| KRT23     | 0.86 | 0.127963 | 0.76  |
| KRTAP19-3 | 0.86 | 0.127963 | 0.76  |
| LIMD2     | 0.86 | 0.127963 | 0.76  |
| LRRK1     | 0.86 | 0.127963 | 0.76  |
| MAGEB4    | 0.86 | 0.127963 | 0.76  |
| MIR205HG  | 0.86 | 0.325231 | 0.901 |
| MRPL50    | 0.86 | 0.127963 | 0.76  |
| MRPS31    | 0.86 | 0.127963 | 0.76  |
| NOA1      | 0.86 | 0.148161 | 0.796 |
| OR52E2    | 0.86 | 0.127963 | 0.76  |
| PSMD5     | 0.86 | 0.127963 | 0.76  |
| RAD21     | 0.86 | 0.200087 | 0.838 |
| RBM11     | 0.86 | 0.127963 | 0.76  |
| RNF7      | 0.86 | 0.148161 | 0.796 |
| RPF1      | 0.86 | 0.127963 | 0.76  |
| SCGB2A1   | 0.86 | 0.127963 | 0.76  |
| SENP8     | 0.86 | 0.127963 | 0.76  |
| SH2D5     | 0.86 | 0.127963 | 0.76  |
| SHANK2    | 0.86 | 0.127963 | 0.76  |
| SLC35A4   | 0.86 | 0.127963 | 0.76  |
| SPA17     | 0.86 | 0.127963 | 0.76  |
| UBA7      | 0.86 | 0.127963 | 0.76  |
| UTP20     | 0.86 | 0.200087 | 0.838 |
| ZFP64     | 0.86 | 0.127963 | 0.76  |
| ACSS3     | 0.87 | 0.123759 | 0.756 |
| AGAP6     | 0.87 | 0.123759 | 0.756 |
| AMZ1      | 0.87 | 0.123759 | 0.756 |
| ANKRD36B  | 0.87 | 0.123759 | 0.756 |
| APOBEC3D  | 0.87 | 0.123759 | 0.756 |
| BAIAP2L1  | 0.87 | 0.123759 | 0.756 |
| BMX       | 0.87 | 0.123759 | 0.756 |
| C10orf25  | 0.87 | 0.123759 | 0.756 |
| C12orf61  | 0.87 | 0.143665 | 0.788 |
| C14orf119 | 0.87 | 0.123759 | 0.756 |
| C6orf52   | 0.87 | 0.123759 | 0.756 |
| C9orf89   | 0.87 | 0.123759 | 0.756 |
| CLTC      | 0.87 | 0.167214 | 0.812 |
| CNTF      | 0.87 | 0.123759 | 0.756 |
| CSRP3     | 0.87 | 0.123759 | 0.756 |
| DCAF8L1   | 0.87 | 0.123759 | 0.756 |
| DEFB110   | 0.87 | 0.195098 | 0.838 |
| DHX32     | 0.87 | 0.143666 | 0.788 |
| GXYLT2    | 0.87 | 0.143665 | 0.788 |
| HDX       | 0.87 | 0.123759 | 0.756 |
| IL13RA1   | 0.87 | 0.123759 | 0.756 |
| INHBA     | 0.87 | 0.123759 | 0.756 |

|           |      |          |       |
|-----------|------|----------|-------|
| MMP20     | 0.87 | 0.123759 | 0.756 |
| MRVI1     | 0.87 | 0.123759 | 0.756 |
| NBEA      | 0.87 | 0.123759 | 0.756 |
| NDUFS2    | 0.87 | 0.123759 | 0.756 |
| OR10G3    | 0.87 | 0.143665 | 0.788 |
| PPP1R3G   | 0.87 | 0.123759 | 0.756 |
| PRMT3     | 0.87 | 0.143665 | 0.788 |
| PUF60     | 0.87 | 0.195098 | 0.838 |
| RIMKLB    | 0.87 | 0.123759 | 0.756 |
| RPP30     | 0.87 | 0.123759 | 0.756 |
| SCGB1C1   | 0.87 | 0.123759 | 0.756 |
| SERINC2   | 0.87 | 0.123759 | 0.756 |
| SETDB2    | 0.87 | 0.123759 | 0.756 |
| SF3B2     | 0.87 | 0.123759 | 0.756 |
| SFRP2     | 0.87 | 0.143665 | 0.788 |
| SYNC      | 0.87 | 0.123759 | 0.756 |
| TBC1D29   | 0.87 | 0.123759 | 0.756 |
| TMED9     | 0.87 | 0.143665 | 0.788 |
| UBA2      | 0.87 | 0.143666 | 0.788 |
| ZBED6CL   | 0.87 | 0.123759 | 0.756 |
| ZNF384    | 0.87 | 0.123759 | 0.756 |
| ZNF629    | 0.87 | 0.123759 | 0.756 |
| ACVR2A    | 0.88 | 0.11959  | 0.75  |
| ADAM20    | 0.88 | 0.11959  | 0.75  |
| ADPRM     | 0.88 | 0.13937  | 0.784 |
| AP1S1     | 0.88 | 0.11959  | 0.75  |
| ASCL1     | 0.88 | 0.11959  | 0.75  |
| ATG3      | 0.88 | 0.16258  | 0.81  |
| C16orf87  | 0.88 | 0.11959  | 0.75  |
| C17orf80  | 0.88 | 0.11959  | 0.75  |
| CDC16     | 0.88 | 0.190145 | 0.837 |
| CLDN3     | 0.88 | 0.11959  | 0.75  |
| CREBL2    | 0.88 | 0.11959  | 0.75  |
| CXorf58   | 0.88 | 0.11959  | 0.75  |
| DNM1      | 0.88 | 0.11959  | 0.75  |
| EIF2S2    | 0.88 | 0.11959  | 0.75  |
| ESR2      | 0.88 | 0.11959  | 0.75  |
| FBXO47    | 0.88 | 0.11959  | 0.75  |
| GALNT7    | 0.88 | 0.11959  | 0.75  |
| GNAL      | 0.88 | 0.11959  | 0.75  |
| GOLGA6L2  | 0.88 | 0.11959  | 0.75  |
| GPRASP1   | 0.88 | 0.11959  | 0.75  |
| KCNK2     | 0.88 | 0.11959  | 0.75  |
| KIAA0895L | 0.88 | 0.11959  | 0.75  |
| KPNA7     | 0.88 | 0.11959  | 0.75  |
| LHX5      | 0.88 | 0.11959  | 0.75  |
| LOC81691  | 0.88 | 0.11959  | 0.75  |

|           |      |          |       |
|-----------|------|----------|-------|
| NAP1L5    | 0.88 | 0.13937  | 0.784 |
| NLRC3     | 0.88 | 0.11959  | 0.75  |
| NPY4R     | 0.88 | 0.162581 | 0.81  |
| NXF3      | 0.88 | 0.13937  | 0.784 |
| OR8B2     | 0.88 | 0.11959  | 0.75  |
| PDK3      | 0.88 | 0.13937  | 0.784 |
| PSD2      | 0.88 | 0.11959  | 0.75  |
| PVRL2     | 0.88 | 0.11959  | 0.75  |
| RANBP17   | 0.88 | 0.11959  | 0.75  |
| SCYL2     | 0.88 | 0.11959  | 0.75  |
| SIRT7     | 0.88 | 0.11959  | 0.75  |
| SIX4      | 0.88 | 0.13937  | 0.784 |
| SLC13A2   | 0.88 | 0.11959  | 0.75  |
| STEAP1    | 0.88 | 0.11959  | 0.75  |
| TIE1      | 0.88 | 0.139369 | 0.784 |
| TRPV4     | 0.88 | 0.11959  | 0.75  |
| ULK2      | 0.88 | 0.11959  | 0.75  |
| WBP1      | 0.88 | 0.11959  | 0.75  |
| ZNF444    | 0.88 | 0.11959  | 0.75  |
| ARHGAP6   | 0.89 | 0.115548 | 0.743 |
| ATP10B    | 0.89 | 0.115549 | 0.743 |
| BAK1      | 0.89 | 0.115548 | 0.743 |
| BLOC1S2   | 0.89 | 0.115548 | 0.743 |
| C1GALT1C1 | 0.89 | 0.115548 | 0.743 |
| CCT8      | 0.89 | 0.157977 | 0.806 |
| CHCHD1    | 0.89 | 0.115548 | 0.743 |
| CXorf66   | 0.89 | 0.115548 | 0.743 |
| DHCR7     | 0.89 | 0.115549 | 0.743 |
| DMGDH     | 0.89 | 0.115548 | 0.743 |
| EEF1B2    | 0.89 | 0.115548 | 0.743 |
| ERBB3     | 0.89 | 0.115548 | 0.743 |
| ERP44     | 0.89 | 0.115548 | 0.743 |
| FAR1      | 0.89 | 0.115549 | 0.743 |
| GOLGA6L6  | 0.89 | 0.157977 | 0.806 |
| HLA-DRB5  | 0.89 | 0.135061 | 0.779 |
| HLTF      | 0.89 | 0.115548 | 0.743 |
| HMOX1     | 0.89 | 0.115548 | 0.743 |
| KCNF1     | 0.89 | 0.115548 | 0.743 |
| LIPG      | 0.89 | 0.115549 | 0.743 |
| MAGEB18   | 0.89 | 0.115548 | 0.743 |
| MAOB      | 0.89 | 0.115548 | 0.743 |
| MECR      | 0.89 | 0.115549 | 0.743 |
| MLX       | 0.89 | 0.115548 | 0.743 |
| NPIP11    | 0.89 | 0.157977 | 0.806 |
| NUBPL     | 0.89 | 0.115548 | 0.743 |
| OR10J3    | 0.89 | 0.135062 | 0.779 |
| PARP3     | 0.89 | 0.115548 | 0.743 |

|           |      |          |       |
|-----------|------|----------|-------|
| PPM1K     | 0.89 | 0.115548 | 0.743 |
| PSMC6     | 0.89 | 0.157977 | 0.806 |
| RPS27A    | 0.89 | 0.115549 | 0.743 |
| SCAF11    | 0.89 | 0.115549 | 0.743 |
| SERPINB13 | 0.89 | 0.115548 | 0.743 |
| SKAP1     | 0.89 | 0.115548 | 0.743 |
| TMCC3     | 0.89 | 0.115548 | 0.743 |
| TYROBP    | 0.89 | 0.115548 | 0.743 |
| UACA      | 0.89 | 0.115549 | 0.743 |
| UBE2F     | 0.89 | 0.115548 | 0.743 |
| VIL1      | 0.89 | 0.115549 | 0.743 |
| VPRBP     | 0.89 | 0.157977 | 0.806 |
| XKR8      | 0.89 | 0.115548 | 0.743 |
| ZNF274    | 0.89 | 0.18531  | 0.833 |
| AFF1      | 0.9  | 0.153489 | 0.803 |
| AGBL4     | 0.9  | 0.153489 | 0.803 |
| BRINP2    | 0.9  | 0.111642 | 0.736 |
| C10orf53  | 0.9  | 0.111642 | 0.736 |
| C10orf55  | 0.9  | 0.130901 | 0.767 |
| C10orf68  | 0.9  | 0.111642 | 0.736 |
| C1orf122  | 0.9  | 0.111642 | 0.736 |
| CDA       | 0.9  | 0.111643 | 0.736 |
| ENHO      | 0.9  | 0.130901 | 0.767 |
| FIG4      | 0.9  | 0.111643 | 0.736 |
| GIMAP2    | 0.9  | 0.111642 | 0.736 |
| GPR52     | 0.9  | 0.111642 | 0.736 |
| IER5L     | 0.9  | 0.1309   | 0.767 |
| ING4      | 0.9  | 0.111642 | 0.736 |
| KCTD15    | 0.9  | 0.111642 | 0.736 |
| KCTD3     | 0.9  | 0.111642 | 0.736 |
| KIAA0226L | 0.9  | 0.111642 | 0.736 |
| KLHL23    | 0.9  | 0.111642 | 0.736 |
| LCN1      | 0.9  | 0.111642 | 0.736 |
| MC3R      | 0.9  | 0.1309   | 0.767 |
| MRPL18    | 0.9  | 0.130901 | 0.767 |
| MRPS17    | 0.9  | 0.111643 | 0.736 |
| MRRF      | 0.9  | 0.111642 | 0.736 |
| MYH7      | 0.9  | 0.111642 | 0.736 |
| NCOA6     | 0.9  | 0.111643 | 0.736 |
| NOTCH1    | 0.9  | 0.111642 | 0.736 |
| NR2C1     | 0.9  | 0.111643 | 0.736 |
| NUP210L   | 0.9  | 0.111642 | 0.736 |
| PFKP      | 0.9  | 0.111642 | 0.736 |
| PIK3IP1   | 0.9  | 0.111643 | 0.736 |
| PLEKHB2   | 0.9  | 0.111642 | 0.736 |
| POFUT2    | 0.9  | 0.111642 | 0.736 |
| RTN1      | 0.9  | 0.111642 | 0.736 |

|          |      |          |       |
|----------|------|----------|-------|
| SCML2    | 0.9  | 0.111642 | 0.736 |
| SLC22A6  | 0.9  | 0.111642 | 0.736 |
| SLC7A4   | 0.9  | 0.111642 | 0.736 |
| SVOP     | 0.9  | 0.111642 | 0.736 |
| THOC1    | 0.9  | 0.111642 | 0.736 |
| TMEM40   | 0.9  | 0.111642 | 0.736 |
| XK       | 0.9  | 0.111642 | 0.736 |
| XRCC6BP1 | 0.9  | 0.111642 | 0.736 |
| ZSWIM5   | 0.9  | 0.111642 | 0.736 |
| ARL6IP6  | 0.91 | 0.107854 | 0.733 |
| ARMC5    | 0.91 | 0.107854 | 0.733 |
| ARRDC5   | 0.91 | 0.107854 | 0.733 |
| BPIFC    | 0.91 | 0.126812 | 0.76  |
| CHCHD6   | 0.91 | 0.107854 | 0.733 |
| CXCL6    | 0.91 | 0.126812 | 0.76  |
| CXorf30  | 0.91 | 0.107854 | 0.733 |
| EPG5     | 0.91 | 0.107854 | 0.733 |
| EPPK1    | 0.91 | 0.107854 | 0.733 |
| HCST     | 0.91 | 0.107854 | 0.733 |
| INO80    | 0.91 | 0.126812 | 0.76  |
| IRAK1BP1 | 0.91 | 0.107854 | 0.733 |
| LGALS3BP | 0.91 | 0.126812 | 0.76  |
| MSL2     | 0.91 | 0.107854 | 0.733 |
| OR5T1    | 0.91 | 0.107854 | 0.733 |
| PIM3     | 0.91 | 0.107854 | 0.733 |
| POFUT1   | 0.91 | 0.107854 | 0.733 |
| PORCN    | 0.91 | 0.107854 | 0.733 |
| RAB8B    | 0.91 | 0.107854 | 0.733 |
| REST     | 0.91 | 0.107854 | 0.733 |
| SLC15A1  | 0.91 | 0.107854 | 0.733 |
| SLC25A32 | 0.91 | 0.126811 | 0.76  |
| SLC25A5  | 0.91 | 0.107854 | 0.733 |
| SSH3     | 0.91 | 0.107854 | 0.733 |
| STAU1    | 0.91 | 0.107854 | 0.733 |
| TBC1D9B  | 0.91 | 0.107854 | 0.733 |
| TIFAB    | 0.91 | 0.107854 | 0.733 |
| TMEM155  | 0.91 | 0.107854 | 0.733 |
| TMEM163  | 0.91 | 0.107854 | 0.733 |
| TMEM54   | 0.91 | 0.107854 | 0.733 |
| TTC28    | 0.91 | 0.107854 | 0.733 |
| UGT1A6   | 0.91 | 0.107854 | 0.733 |
| WBSCR16  | 0.91 | 0.149111 | 0.796 |
| YWHAE    | 0.91 | 0.107854 | 0.733 |
| ZBTB20   | 0.91 | 0.107854 | 0.733 |
| ZDHHC18  | 0.91 | 0.126812 | 0.76  |
| ZNF100   | 0.91 | 0.107854 | 0.733 |
| ACRC     | 0.92 | 0.104191 | 0.727 |

|          |      |          |       |
|----------|------|----------|-------|
| ADORA3   | 0.92 | 0.104191 | 0.727 |
| ARRDC4   | 0.92 | 0.104192 | 0.727 |
| C14orf93 | 0.92 | 0.122845 | 0.756 |
| C21orf58 | 0.92 | 0.104192 | 0.727 |
| CCER1    | 0.92 | 0.122846 | 0.756 |
| CRADD    | 0.92 | 0.104191 | 0.727 |
| CRYGS    | 0.92 | 0.104192 | 0.727 |
| DHX29    | 0.92 | 0.104191 | 0.727 |
| DMRT1    | 0.92 | 0.104192 | 0.727 |
| DRAM1    | 0.92 | 0.122846 | 0.756 |
| EIF5     | 0.92 | 0.144825 | 0.788 |
| ENOX1    | 0.92 | 0.104192 | 0.727 |
| FAM149B1 | 0.92 | 0.122846 | 0.756 |
| FAM173A  | 0.92 | 0.104191 | 0.727 |
| FAM20B   | 0.92 | 0.104191 | 0.727 |
| FNDC1    | 0.92 | 0.104192 | 0.727 |
| GPR4     | 0.92 | 0.104191 | 0.727 |
| HIF1AN   | 0.92 | 0.104191 | 0.727 |
| HSD11B1  | 0.92 | 0.104192 | 0.727 |
| MAPK1    | 0.92 | 0.104192 | 0.727 |
| MS4A1    | 0.92 | 0.104191 | 0.727 |
| OTOP3    | 0.92 | 0.104192 | 0.727 |
| RBM1A    | 0.92 | 0.104191 | 0.727 |
| SOX3     | 0.92 | 0.104191 | 0.727 |
| SYNGR3   | 0.92 | 0.104191 | 0.727 |
| TGM2     | 0.92 | 0.104191 | 0.727 |
| TRIM41   | 0.92 | 0.122846 | 0.756 |
| TTC31    | 0.92 | 0.104191 | 0.727 |
| TULP2    | 0.92 | 0.104192 | 0.727 |
| VDAC2    | 0.92 | 0.104192 | 0.727 |
| ZIK1     | 0.92 | 0.122846 | 0.756 |
| ACR      | 0.93 | 0.100589 | 0.72  |
| ANKRD42  | 0.93 | 0.100589 | 0.72  |
| AP4B1    | 0.93 | 0.100589 | 0.72  |
| BEX1     | 0.93 | 0.100589 | 0.72  |
| BOK      | 0.93 | 0.100589 | 0.72  |
| BPGM     | 0.93 | 0.10059  | 0.72  |
| FAM63A   | 0.93 | 0.100589 | 0.72  |
| GAK      | 0.93 | 0.100589 | 0.72  |
| HADH     | 0.93 | 0.10059  | 0.72  |
| NIPA1    | 0.93 | 0.100589 | 0.72  |
| PRCP     | 0.93 | 0.100589 | 0.72  |
| PRKCZ    | 0.93 | 0.10059  | 0.72  |
| PTDSS1   | 0.93 | 0.100589 | 0.72  |
| RAB38    | 0.93 | 0.100589 | 0.72  |
| RASGEF1B | 0.93 | 0.100589 | 0.72  |
| RBMXL3   | 0.93 | 0.100589 | 0.72  |

|          |      |          |       |
|----------|------|----------|-------|
| SAYSD1   | 0.93 | 0.100589 | 0.72  |
| SGOL2    | 0.93 | 0.100589 | 0.72  |
| SLC7A6OS | 0.93 | 0.100589 | 0.72  |
| SMIM17   | 0.93 | 0.100589 | 0.72  |
| SNN      | 0.93 | 0.100589 | 0.72  |
| TDRD5    | 0.93 | 0.10059  | 0.72  |
| TOP2A    | 0.93 | 0.118955 | 0.75  |
| USF1     | 0.93 | 0.10059  | 0.72  |
| WASF3    | 0.93 | 0.100589 | 0.72  |
| WWP2     | 0.93 | 0.100589 | 0.72  |
| ZNF727   | 0.93 | 0.100589 | 0.72  |
| ZNF804B  | 0.93 | 0.118956 | 0.75  |
| ANTXR1   | 0.94 | 0.115212 | 0.743 |
| AZIN1    | 0.94 | 0.097148 | 0.713 |
| C7orf65  | 0.94 | 0.097148 | 0.713 |
| CCDC82   | 0.94 | 0.097148 | 0.713 |
| CMTM4    | 0.94 | 0.097148 | 0.713 |
| COQ3     | 0.94 | 0.097148 | 0.713 |
| CREG1    | 0.94 | 0.115212 | 0.743 |
| CYP4X1   | 0.94 | 0.097148 | 0.713 |
| EIF3I    | 0.94 | 0.16258  | 0.81  |
| EPB42    | 0.94 | 0.097148 | 0.713 |
| GJD3     | 0.94 | 0.097148 | 0.713 |
| GOLGA8A  | 0.94 | 0.097148 | 0.713 |
| HDGFRP3  | 0.94 | 0.097148 | 0.713 |
| HIPK3    | 0.94 | 0.097148 | 0.713 |
| IPMK     | 0.94 | 0.097148 | 0.713 |
| KCNK18   | 0.94 | 0.097148 | 0.713 |
| LMTK2    | 0.94 | 0.097148 | 0.713 |
| MALSU1   | 0.94 | 0.097148 | 0.713 |
| MICU2    | 0.94 | 0.115212 | 0.743 |
| NAAA     | 0.94 | 0.097148 | 0.713 |
| NFKBIA   | 0.94 | 0.097148 | 0.713 |
| NOG      | 0.94 | 0.097148 | 0.713 |
| OMD      | 0.94 | 0.097148 | 0.713 |
| OR4F21   | 0.94 | 0.162579 | 0.81  |
| PCBD2    | 0.94 | 0.097148 | 0.713 |
| PCDHB16  | 0.94 | 0.097148 | 0.713 |
| PDS5B    | 0.94 | 0.097148 | 0.713 |
| PHF23    | 0.94 | 0.097148 | 0.713 |
| PPARD    | 0.94 | 0.097148 | 0.713 |
| RNF114   | 0.94 | 0.097148 | 0.713 |
| RRN3     | 0.94 | 0.097148 | 0.713 |
| SC5D     | 0.94 | 0.097148 | 0.713 |
| SPARC    | 0.94 | 0.097148 | 0.713 |
| TMEM212  | 0.94 | 0.097148 | 0.713 |
| TPBGL    | 0.94 | 0.097148 | 0.713 |

|            |      |          |       |
|------------|------|----------|-------|
| WSB2       | 0.94 | 0.097148 | 0.713 |
| AGR3       | 0.95 | 0.093754 | 0.708 |
| AMOTL1     | 0.95 | 0.093755 | 0.708 |
| ARPP21     | 0.95 | 0.093755 | 0.708 |
| BLZF1      | 0.95 | 0.093755 | 0.708 |
| C2orf80    | 0.95 | 0.093754 | 0.708 |
| CCDC173    | 0.95 | 0.093754 | 0.708 |
| CELA2A     | 0.95 | 0.093754 | 0.708 |
| CLEC2D     | 0.95 | 0.093754 | 0.708 |
| CLRN1      | 0.95 | 0.093754 | 0.708 |
| CLSTN3     | 0.95 | 0.093755 | 0.708 |
| COLEC10    | 0.95 | 0.093754 | 0.708 |
| EFCAB4B    | 0.95 | 0.093755 | 0.708 |
| EXOC3L1    | 0.95 | 0.093755 | 0.708 |
| FA2H       | 0.95 | 0.093755 | 0.708 |
| FCRL2      | 0.95 | 0.093755 | 0.708 |
| GOLGA6L4   | 0.95 | 0.093755 | 0.708 |
| GPR125     | 0.95 | 0.093754 | 0.708 |
| GPRC5B     | 0.95 | 0.093755 | 0.708 |
| HNMT       | 0.95 | 0.093755 | 0.708 |
| IFI16      | 0.95 | 0.093755 | 0.708 |
| ITPR1PL1   | 0.95 | 0.093755 | 0.708 |
| IVNS1ABP   | 0.95 | 0.093755 | 0.708 |
| MAGT1      | 0.95 | 0.093755 | 0.708 |
| MAPK7      | 0.95 | 0.093755 | 0.708 |
| MED15      | 0.95 | 0.093755 | 0.708 |
| MORC4      | 0.95 | 0.093754 | 0.708 |
| NRAP       | 0.95 | 0.111572 | 0.736 |
| NTRK3      | 0.95 | 0.093754 | 0.708 |
| OR4M2      | 0.95 | 0.19029  | 0.837 |
| OTX2       | 0.95 | 0.093755 | 0.708 |
| PAPPA      | 0.95 | 0.093754 | 0.708 |
| PKNOX2     | 0.95 | 0.111573 | 0.736 |
| PLA2G15    | 0.95 | 0.093754 | 0.708 |
| PLEKHD1    | 0.95 | 0.093755 | 0.708 |
| POLR2J     | 0.95 | 0.22995  | 0.854 |
| RBCK1      | 0.95 | 0.111573 | 0.736 |
| RPL36A-HNI | 0.95 | 0.278806 | 0.88  |
| SHMT2      | 0.95 | 0.093754 | 0.708 |
| SLC25A26   | 0.95 | 0.093755 | 0.708 |
| SLC25A6    | 0.95 | 0.093755 | 0.708 |
| SLC5A12    | 0.95 | 0.093754 | 0.708 |
| UBAP2      | 0.95 | 0.093755 | 0.708 |
| UGT1A8     | 0.95 | 0.093755 | 0.708 |
| WDR83OS    | 0.95 | 0.093754 | 0.708 |
| ZFP62      | 0.95 | 0.093755 | 0.708 |
| ZNF665     | 0.95 | 0.093755 | 0.708 |

|           |      |          |       |
|-----------|------|----------|-------|
| ZNF853    | 0.95 | 0.093754 | 0.708 |
| ARHGAP24  | 0.96 | 0.090499 | 0.708 |
| C10orf118 | 0.96 | 0.090499 | 0.708 |
| C6orf62   | 0.96 | 0.090499 | 0.708 |
| CATSPER3  | 0.96 | 0.128757 | 0.763 |
| CCDC177   | 0.96 | 0.090499 | 0.708 |
| CDCP2     | 0.96 | 0.090499 | 0.708 |
| CIITA     | 0.96 | 0.090499 | 0.708 |
| CNOT4     | 0.96 | 0.090499 | 0.708 |
| CREM      | 0.96 | 0.090499 | 0.708 |
| CRHBP     | 0.96 | 0.090499 | 0.708 |
| CRYBB3    | 0.96 | 0.090499 | 0.708 |
| GCG       | 0.96 | 0.090499 | 0.708 |
| GFPT2     | 0.96 | 0.090499 | 0.708 |
| GPR12     | 0.96 | 0.090499 | 0.708 |
| GTSCR1    | 0.96 | 0.090499 | 0.708 |
| H3F3A     | 0.96 | 0.090499 | 0.708 |
| IGLL5     | 0.96 | 0.090499 | 0.708 |
| KRTAP10-8 | 0.96 | 0.10798  | 0.733 |
| KRTAP22-2 | 0.96 | 0.090499 | 0.708 |
| LDHC      | 0.96 | 0.090499 | 0.708 |
| LENG9     | 0.96 | 0.090499 | 0.708 |
| MANEAL    | 0.96 | 0.090499 | 0.708 |
| MDFI      | 0.96 | 0.090499 | 0.708 |
| MYO9B     | 0.96 | 0.090499 | 0.708 |
| NLGN4X    | 0.96 | 0.090499 | 0.708 |
| NPIP15    | 0.96 | 0.090499 | 0.708 |
| NRG4      | 0.96 | 0.090499 | 0.708 |
| OGFOD3    | 0.96 | 0.090499 | 0.708 |
| PLCL2     | 0.96 | 0.090499 | 0.708 |
| POLR2M    | 0.96 | 0.090499 | 0.708 |
| PRB3      | 0.96 | 0.128757 | 0.763 |
| PRM1      | 0.96 | 0.090499 | 0.708 |
| RUNDC3A   | 0.96 | 0.10798  | 0.733 |
| SCAI      | 0.96 | 0.090499 | 0.708 |
| TASP1     | 0.96 | 0.090499 | 0.708 |
| TMEM61    | 0.96 | 0.10798  | 0.733 |
| TRPC3     | 0.96 | 0.090499 | 0.708 |
| TYK2      | 0.96 | 0.090499 | 0.708 |
| UTP11L    | 0.96 | 0.090499 | 0.708 |
| VIM       | 0.96 | 0.090499 | 0.708 |
| WDR45     | 0.96 | 0.090499 | 0.708 |
| XAF1      | 0.96 | 0.090499 | 0.708 |
| C8orf89   | 0.97 | 0.124979 | 0.76  |
| COL4A3    | 0.97 | 0.087285 | 0.708 |
| CTAG2     | 0.97 | 0.087285 | 0.708 |
| DDX5      | 0.97 | 0.087285 | 0.708 |

|             |      |          |       |
|-------------|------|----------|-------|
| ELF2        | 0.97 | 0.087285 | 0.708 |
| FADD        | 0.97 | 0.104529 | 0.727 |
| FAM151B     | 0.97 | 0.087285 | 0.708 |
| FAM21A      | 0.97 | 0.087285 | 0.708 |
| FGFR1       | 0.97 | 0.087285 | 0.708 |
| FRYL        | 0.97 | 0.087285 | 0.708 |
| GNG3        | 0.97 | 0.087285 | 0.708 |
| GPHA2       | 0.97 | 0.087285 | 0.708 |
| IGSF9       | 0.97 | 0.087285 | 0.708 |
| IRX2        | 0.97 | 0.10453  | 0.727 |
| KLHL31      | 0.97 | 0.087285 | 0.708 |
| PALB2       | 0.97 | 0.10453  | 0.727 |
| PARD6B      | 0.97 | 0.087286 | 0.708 |
| PPP2R5C     | 0.97 | 0.087285 | 0.708 |
| PPP3CA      | 0.97 | 0.087286 | 0.708 |
| PRSS54      | 0.97 | 0.087285 | 0.708 |
| RAB27A      | 0.97 | 0.10453  | 0.727 |
| RASAL1      | 0.97 | 0.087285 | 0.708 |
| RSPO1       | 0.97 | 0.087285 | 0.708 |
| SCNN1G      | 0.97 | 0.087285 | 0.708 |
| SFMBT1      | 0.97 | 0.10453  | 0.727 |
| SPOCD1      | 0.97 | 0.087285 | 0.708 |
| STEAP4      | 0.97 | 0.087285 | 0.708 |
| TRIM71      | 0.97 | 0.087285 | 0.708 |
| USP9Y       | 0.97 | 0.087285 | 0.708 |
| ANGPTL6     | 0.98 | 0.121284 | 0.756 |
| ASPHD2      | 0.98 | 0.084209 | 0.7   |
| BLID        | 0.98 | 0.08421  | 0.7   |
| BLOC1S4     | 0.98 | 0.08421  | 0.7   |
| BMP6        | 0.98 | 0.08421  | 0.7   |
| BRMS1       | 0.98 | 0.101146 | 0.72  |
| C15orf38-AF | 0.98 | 0.101146 | 0.72  |
| CACNB1      | 0.98 | 0.084209 | 0.7   |
| FAM58A      | 0.98 | 0.08421  | 0.7   |
| FBXL5       | 0.98 | 0.084209 | 0.7   |
| GATC        | 0.98 | 0.08421  | 0.7   |
| IRF2BP1     | 0.98 | 0.101146 | 0.72  |
| KIAA0895    | 0.98 | 0.084209 | 0.7   |
| MIDN        | 0.98 | 0.084209 | 0.7   |
| ORAI1       | 0.98 | 0.08421  | 0.7   |
| OTUD3       | 0.98 | 0.101146 | 0.72  |
| PDCL2       | 0.98 | 0.101146 | 0.72  |
| RBFOX1      | 0.98 | 0.101146 | 0.72  |
| RBMS1       | 0.98 | 0.084209 | 0.7   |
| SEL1L2      | 0.98 | 0.08421  | 0.7   |
| SHC3        | 0.98 | 0.101146 | 0.72  |
| SPTAN1      | 0.98 | 0.08421  | 0.7   |

|            |      |          |       |
|------------|------|----------|-------|
| SULT1A3    | 0.98 | 0.084209 | 0.7   |
| TAF6       | 0.98 | 0.121285 | 0.756 |
| TFEB       | 0.98 | 0.101145 | 0.72  |
| TIAL1      | 0.98 | 0.084209 | 0.7   |
| TLR6       | 0.98 | 0.08421  | 0.7   |
| TMEM196    | 0.98 | 0.084209 | 0.7   |
| TMX1       | 0.98 | 0.084209 | 0.7   |
| TYSND1     | 0.98 | 0.08421  | 0.7   |
| UVRAG      | 0.98 | 0.08421  | 0.7   |
| VSTM5      | 0.98 | 0.08421  | 0.7   |
| ACBD5      | 0.99 | 0.081205 | 0.69  |
| ANG        | 0.99 | 0.081206 | 0.69  |
| ASCL2      | 0.99 | 0.081206 | 0.69  |
| ATP4A      | 0.99 | 0.081206 | 0.69  |
| BGN        | 0.99 | 0.081206 | 0.69  |
| C2orf72    | 0.99 | 0.081206 | 0.69  |
| CALM1      | 0.99 | 0.081206 | 0.69  |
| CCDC153    | 0.99 | 0.081206 | 0.69  |
| CD69       | 0.99 | 0.081206 | 0.69  |
| CDH17      | 0.99 | 0.081206 | 0.69  |
| DCUN1D1    | 0.99 | 0.081206 | 0.69  |
| GRM8       | 0.99 | 0.097794 | 0.714 |
| HARS       | 0.99 | 0.259816 | 0.87  |
| HNF4G      | 0.99 | 0.081206 | 0.69  |
| IFI30      | 0.99 | 0.081206 | 0.69  |
| IMPACT     | 0.99 | 0.081206 | 0.69  |
| KRTAP4-5   | 0.99 | 0.097794 | 0.714 |
| LYPD6      | 0.99 | 0.081206 | 0.69  |
| MARC1      | 0.99 | 0.081206 | 0.69  |
| MCUR1      | 0.99 | 0.081206 | 0.69  |
| MEP1B      | 0.99 | 0.081206 | 0.69  |
| NOL3       | 0.99 | 0.097794 | 0.714 |
| NR0B1      | 0.99 | 0.081206 | 0.69  |
| PDIK1L     | 0.99 | 0.081206 | 0.69  |
| PLEKHM2    | 0.99 | 0.097793 | 0.714 |
| POLR2A     | 0.99 | 0.097794 | 0.714 |
| RAB3GAP2   | 0.99 | 0.081206 | 0.69  |
| RBMX1D     | 0.99 | 0.081206 | 0.69  |
| RIPK2      | 0.99 | 0.081206 | 0.69  |
| RPL22L1    | 0.99 | 0.081205 | 0.69  |
| RPS13      | 0.99 | 0.142064 | 0.787 |
| RSBN1L     | 0.99 | 0.081205 | 0.69  |
| RXFP2      | 0.99 | 0.081205 | 0.69  |
| SLC7A6     | 0.99 | 0.097794 | 0.714 |
| SRGAP1     | 0.99 | 0.081205 | 0.69  |
| ST20-MTHF1 | 0.99 | 0.081206 | 0.69  |
| SULT1A4    | 0.99 | 0.081206 | 0.69  |

|          |      |          |       |
|----------|------|----------|-------|
| SUMF1    | 0.99 | 0.081205 | 0.69  |
| SUPT5H   | 0.99 | 0.11766  | 0.75  |
| TGM4     | 0.99 | 0.081206 | 0.69  |
| USP9X    | 0.99 | 0.081206 | 0.69  |
| ZBTB8A   | 0.99 | 0.081205 | 0.69  |
| ZFX      | 0.99 | 0.081206 | 0.69  |
| ZNF330   | 0.99 | 0.097793 | 0.714 |
| AGO3     | 1    | 0.078305 | 0.688 |
| ATF2     | 1    | 0.078305 | 0.688 |
| ATXN2L   | 1    | 0.078305 | 0.688 |
| CCDC15   | 1    | 0.078305 | 0.688 |
| DCT      | 1    | 0.078305 | 0.688 |
| EMC2     | 1    | 0.078305 | 0.688 |
| FTO      | 1    | 0.078305 | 0.688 |
| GNB3     | 1    | 0.094596 | 0.711 |
| HERC4    | 1    | 0.078305 | 0.688 |
| HMX3     | 1    | 0.078305 | 0.688 |
| KCNK10   | 1    | 0.078305 | 0.688 |
| KLHDC4   | 1    | 0.078305 | 0.688 |
| KRTAP5-9 | 1    | 0.078305 | 0.688 |
| MIPEP    | 1    | 0.078305 | 0.688 |
| NKAPL    | 1    | 0.078305 | 0.688 |
| NMRK1    | 1    | 0.078305 | 0.688 |
| NRAS     | 1    | 0.078305 | 0.688 |
| NRM      | 1    | 0.078305 | 0.688 |
| OVCA2    | 1    | 0.094596 | 0.711 |
| RASL10B  | 1    | 0.078305 | 0.688 |
| RELL2    | 1    | 0.094596 | 0.711 |
| SETD8    | 1    | 0.114138 | 0.743 |
| SLC2A5   | 1    | 0.078305 | 0.688 |
| TAOK2    | 1    | 0.078305 | 0.688 |
| TEX29    | 1    | 0.094597 | 0.711 |
| TFB2M    | 1    | 0.078305 | 0.688 |
| TMEM259  | 1    | 0.094596 | 0.711 |
| USP17L10 | 1    | 0.094596 | 0.711 |
| ZC4H2    | 1    | 0.078305 | 0.688 |
| ADAR     | 1.01 | 0.07549  | 0.68  |
| ANKRD33  | 1.01 | 0.091451 | 0.708 |
| ARGLU1   | 1.01 | 0.091451 | 0.708 |
| CLEC5A   | 1.01 | 0.07549  | 0.68  |
| CNN1     | 1.01 | 0.07549  | 0.68  |
| CNTN4    | 1.01 | 0.110674 | 0.736 |
| COL13A1  | 1.01 | 0.07549  | 0.68  |
| DUS2     | 1.01 | 0.07549  | 0.68  |
| FFAR2    | 1.01 | 0.091451 | 0.708 |
| GLRX5    | 1.01 | 0.091451 | 0.708 |
| HK1      | 1.01 | 0.075489 | 0.68  |

|          |      |          |       |
|----------|------|----------|-------|
| MLLT10   | 1.01 | 0.07549  | 0.68  |
| MT1HL1   | 1.01 | 0.07549  | 0.68  |
| MYO7A    | 1.01 | 0.07549  | 0.68  |
| NDC80    | 1.01 | 0.164923 | 0.81  |
| PBX2     | 1.01 | 0.075489 | 0.68  |
| PDCD2    | 1.01 | 0.110674 | 0.736 |
| PLK1     | 1.01 | 0.164923 | 0.81  |
| RGS11    | 1.01 | 0.091451 | 0.708 |
| RIOK2    | 1.01 | 0.07549  | 0.68  |
| RPA3     | 1.01 | 0.110673 | 0.736 |
| SLC37A1  | 1.01 | 0.07549  | 0.68  |
| SNX29    | 1.01 | 0.07549  | 0.68  |
| TBC1D4   | 1.01 | 0.07549  | 0.68  |
| VPS41    | 1.01 | 0.07549  | 0.68  |
| ACOT6    | 1.02 | 0.088472 | 0.708 |
| ANGPTL1  | 1.02 | 0.072739 | 0.669 |
| BEST4    | 1.02 | 0.072739 | 0.669 |
| C15orf52 | 1.02 | 0.088473 | 0.708 |
| C22orf46 | 1.02 | 0.072739 | 0.669 |
| FOXN2    | 1.02 | 0.072739 | 0.669 |
| GPCPD1   | 1.02 | 0.072739 | 0.669 |
| INTS5    | 1.02 | 0.130874 | 0.767 |
| IRAK2    | 1.02 | 0.072739 | 0.669 |
| L2HGDH   | 1.02 | 0.072739 | 0.669 |
| LMAN1L   | 1.02 | 0.107281 | 0.733 |
| LRWD1    | 1.02 | 0.072739 | 0.669 |
| LSM12    | 1.02 | 0.072739 | 0.669 |
| LYPLAL1  | 1.02 | 0.072738 | 0.669 |
| LYZL6    | 1.02 | 0.072739 | 0.669 |
| MED29    | 1.02 | 0.072739 | 0.669 |
| NARF     | 1.02 | 0.072738 | 0.669 |
| NELFB    | 1.02 | 0.088472 | 0.708 |
| PPAP2A   | 1.02 | 0.072739 | 0.669 |
| PSMD11   | 1.02 | 0.088472 | 0.708 |
| RTN4RL1  | 1.02 | 0.072738 | 0.669 |
| SFTPA2   | 1.02 | 0.088473 | 0.708 |
| SLA      | 1.02 | 0.072738 | 0.669 |
| STRBP    | 1.02 | 0.072739 | 0.669 |
| TCN2     | 1.02 | 0.088473 | 0.708 |
| TMED7    | 1.02 | 0.072739 | 0.669 |
| TSPAN4   | 1.02 | 0.072739 | 0.669 |
| VIMP     | 1.02 | 0.072739 | 0.669 |
| WFDC11   | 1.02 | 0.072739 | 0.669 |
| AFP      | 1.03 | 0.070079 | 0.659 |
| AKR1E2   | 1.03 | 0.070079 | 0.659 |
| CRLS1    | 1.03 | 0.070079 | 0.659 |
| EMC9     | 1.03 | 0.070079 | 0.659 |

|           |      |          |       |
|-----------|------|----------|-------|
| EPHB1     | 1.03 | 0.070079 | 0.659 |
| FBXO39    | 1.03 | 0.070079 | 0.659 |
| FCAMR     | 1.03 | 0.070079 | 0.659 |
| FRZB      | 1.03 | 0.070079 | 0.659 |
| IRF2BP2   | 1.03 | 0.070079 | 0.659 |
| ITGAV     | 1.03 | 0.070079 | 0.659 |
| KIAA1549  | 1.03 | 0.070079 | 0.659 |
| LYPD1     | 1.03 | 0.070079 | 0.659 |
| PATZ1     | 1.03 | 0.085513 | 0.708 |
| PRKRIR    | 1.03 | 0.070078 | 0.659 |
| RDH8      | 1.03 | 0.103986 | 0.727 |
| RHBDD3    | 1.03 | 0.070079 | 0.659 |
| SCML1     | 1.03 | 0.070079 | 0.659 |
| SKA3      | 1.03 | 0.070079 | 0.659 |
| SLC7A5    | 1.03 | 0.070079 | 0.659 |
| SMOC2     | 1.03 | 0.070079 | 0.659 |
| TBC1D3E   | 1.03 | 0.156946 | 0.806 |
| TBC1D3I   | 1.03 | 0.156946 | 0.806 |
| TBC1D3K   | 1.03 | 0.156946 | 0.806 |
| TBC1D3L   | 1.03 | 0.156946 | 0.806 |
| TPX2      | 1.03 | 0.070078 | 0.659 |
| UBR7      | 1.03 | 0.070079 | 0.659 |
| XIAP      | 1.03 | 0.070079 | 0.659 |
| ANXA5     | 1.04 | 0.067526 | 0.652 |
| C6orf89   | 1.04 | 0.067525 | 0.652 |
| C9orf64   | 1.04 | 0.067525 | 0.652 |
| CCNG1     | 1.04 | 0.067525 | 0.652 |
| CNR1      | 1.04 | 0.067526 | 0.652 |
| EP400     | 1.04 | 0.082659 | 0.7   |
| GFM2      | 1.04 | 0.067526 | 0.652 |
| ISLR      | 1.04 | 0.082659 | 0.7   |
| ITGA6     | 1.04 | 0.067525 | 0.652 |
| NAT8B     | 1.04 | 0.067525 | 0.652 |
| NDUFB10   | 1.04 | 0.067525 | 0.652 |
| PDIA4     | 1.04 | 0.067525 | 0.652 |
| PGBD1     | 1.04 | 0.067526 | 0.652 |
| SLC1A4    | 1.04 | 0.067525 | 0.652 |
| SPIRE1    | 1.04 | 0.067525 | 0.652 |
| SSBP2     | 1.04 | 0.067525 | 0.652 |
| TNFRSF11B | 1.04 | 0.067525 | 0.652 |
| TTC13     | 1.04 | 0.067525 | 0.652 |
| TTN       | 1.04 | 0.067525 | 0.652 |
| ZNF319    | 1.04 | 0.067525 | 0.652 |
| ANXA8     | 1.05 | 0.065045 | 0.64  |
| AP1G1     | 1.05 | 0.065044 | 0.64  |
| BATF      | 1.05 | 0.065044 | 0.64  |
| C19orf71  | 1.05 | 0.065044 | 0.64  |

|          |      |          |       |
|----------|------|----------|-------|
| C7orf66  | 1.05 | 0.065045 | 0.64  |
| CXCL17   | 1.05 | 0.065044 | 0.64  |
| CXorf49  | 1.05 | 0.065044 | 0.64  |
| CXorf49B | 1.05 | 0.065044 | 0.64  |
| FAM206A  | 1.05 | 0.065044 | 0.64  |
| GRPR     | 1.05 | 0.065044 | 0.64  |
| KHSRP    | 1.05 | 0.065044 | 0.64  |
| KIAA0825 | 1.05 | 0.065044 | 0.64  |
| L3MBTL3  | 1.05 | 0.065045 | 0.64  |
| PTPN14   | 1.05 | 0.097691 | 0.714 |
| SOHLH1   | 1.05 | 0.079831 | 0.69  |
| SSX5     | 1.05 | 0.065044 | 0.64  |
| TENM1    | 1.05 | 0.065044 | 0.64  |
| THAP1    | 1.05 | 0.065044 | 0.64  |
| ULK3     | 1.05 | 0.065044 | 0.64  |
| VHLL     | 1.05 | 0.065044 | 0.64  |
| ATPIF1   | 1.06 | 0.062624 | 0.631 |
| CBX1     | 1.06 | 0.077122 | 0.688 |
| CCNY     | 1.06 | 0.062624 | 0.631 |
| CEACAM1  | 1.06 | 0.062624 | 0.631 |
| CWC22    | 1.06 | 0.062625 | 0.631 |
| DCAF5    | 1.06 | 0.062624 | 0.631 |
| EYA3     | 1.06 | 0.062624 | 0.631 |
| GP5      | 1.06 | 0.077122 | 0.688 |
| HAP1     | 1.06 | 0.077122 | 0.688 |
| HFM1     | 1.06 | 0.062624 | 0.631 |
| ISL1     | 1.06 | 0.062625 | 0.631 |
| MVP      | 1.06 | 0.062624 | 0.631 |
| OR13A1   | 1.06 | 0.062624 | 0.631 |
| PAF1     | 1.06 | 0.077122 | 0.688 |
| PDE6H    | 1.06 | 0.062624 | 0.631 |
| PIGK     | 1.06 | 0.062624 | 0.631 |
| RASL11B  | 1.06 | 0.062624 | 0.631 |
| RNPEP    | 1.06 | 0.062625 | 0.631 |
| SNX12    | 1.06 | 0.062624 | 0.631 |
| STIP1    | 1.06 | 0.094657 | 0.711 |
| TMEM63C  | 1.06 | 0.062624 | 0.631 |
| WBP11    | 1.06 | 0.062624 | 0.631 |
| ZNF286B  | 1.06 | 0.062624 | 0.631 |
| ADAMTS16 | 1.07 | 0.060279 | 0.622 |
| AOAH     | 1.07 | 0.06028  | 0.622 |
| ARG1     | 1.07 | 0.060279 | 0.622 |
| C11orf52 | 1.07 | 0.074472 | 0.68  |
| CHD6     | 1.07 | 0.06028  | 0.622 |
| DCLK2    | 1.07 | 0.06028  | 0.622 |
| FAM231B  | 1.07 | 0.06028  | 0.622 |
| FRMD4A   | 1.07 | 0.060279 | 0.622 |

|         |      |          |       |
|---------|------|----------|-------|
| GK2     | 1.07 | 0.060279 | 0.622 |
| KCNH7   | 1.07 | 0.074472 | 0.68  |
| KRT24   | 1.07 | 0.06028  | 0.622 |
| LRP12   | 1.07 | 0.06028  | 0.622 |
| MAP3K12 | 1.07 | 0.06028  | 0.622 |
| NISCH   | 1.07 | 0.074472 | 0.68  |
| NTSR2   | 1.07 | 0.06028  | 0.622 |
| OMG     | 1.07 | 0.06028  | 0.622 |
| OTUD6B  | 1.07 | 0.06028  | 0.622 |
| PABPC4L | 1.07 | 0.06028  | 0.622 |
| PACSLN3 | 1.07 | 0.06028  | 0.622 |
| PIK3C2A | 1.07 | 0.06028  | 0.622 |
| PPP1R10 | 1.07 | 0.074472 | 0.68  |
| RBM6    | 1.07 | 0.06028  | 0.622 |
| RIBC1   | 1.07 | 0.074473 | 0.68  |
| RNFT1   | 1.07 | 0.06028  | 0.622 |
| SNX15   | 1.07 | 0.091736 | 0.708 |
| UHRF2   | 1.07 | 0.06028  | 0.622 |
| ZNF273  | 1.07 | 0.074473 | 0.68  |
| ZNF417  | 1.07 | 0.06028  | 0.622 |
| ZNHIT3  | 1.07 | 0.06028  | 0.622 |
| ADAMTS8 | 1.08 | 0.088879 | 0.708 |
| AHI1    | 1.08 | 0.057994 | 0.616 |
| ARL16   | 1.08 | 0.057995 | 0.616 |
| CFHR2   | 1.08 | 0.057995 | 0.616 |
| CLDN34  | 1.08 | 0.057995 | 0.616 |
| DNAH5   | 1.08 | 0.057995 | 0.616 |
| DTX3L   | 1.08 | 0.057995 | 0.616 |
| FGF13   | 1.08 | 0.057995 | 0.616 |
| HLA1    | 1.08 | 0.057994 | 0.616 |
| KDELR1  | 1.08 | 0.057995 | 0.616 |
| LXN     | 1.08 | 0.057994 | 0.616 |
| MGRN1   | 1.08 | 0.057995 | 0.616 |
| MIF4GD  | 1.08 | 0.057995 | 0.616 |
| NDUFAF6 | 1.08 | 0.057994 | 0.616 |
| PHF19   | 1.08 | 0.057995 | 0.616 |
| POLD2   | 1.08 | 0.088879 | 0.708 |
| PPM1A   | 1.08 | 0.057994 | 0.616 |
| PPP3CC  | 1.08 | 0.057994 | 0.616 |
| PSEN1   | 1.08 | 0.057995 | 0.616 |
| RFPL4A  | 1.08 | 0.057995 | 0.616 |
| RXFP4   | 1.08 | 0.071881 | 0.669 |
| SLC23A2 | 1.08 | 0.057995 | 0.616 |
| TCL1B   | 1.08 | 0.057995 | 0.616 |
| TEX38   | 1.08 | 0.057995 | 0.616 |
| UBFD1   | 1.08 | 0.057994 | 0.616 |
| UNC5D   | 1.08 | 0.071881 | 0.669 |

|          |      |          |       |
|----------|------|----------|-------|
| VASN     | 1.08 | 0.057995 | 0.616 |
| WDR63    | 1.08 | 0.057994 | 0.616 |
| ZNF32    | 1.08 | 0.057995 | 0.616 |
| AHCTF1   | 1.09 | 0.069394 | 0.659 |
| AK9      | 1.09 | 0.055786 | 0.613 |
| BMI1     | 1.09 | 0.055786 | 0.613 |
| BPIFB1   | 1.09 | 0.069394 | 0.659 |
| CBY3     | 1.09 | 0.055786 | 0.613 |
| CRX      | 1.09 | 0.055785 | 0.613 |
| DDX21    | 1.09 | 0.107418 | 0.733 |
| DENND4A  | 1.09 | 0.069394 | 0.659 |
| GPR142   | 1.09 | 0.055786 | 0.613 |
| GPRASP2  | 1.09 | 0.055785 | 0.613 |
| KIAA1143 | 1.09 | 0.055785 | 0.613 |
| KLF13    | 1.09 | 0.055785 | 0.613 |
| LMAN1    | 1.09 | 0.055785 | 0.613 |
| LRIG2    | 1.09 | 0.055785 | 0.613 |
| LRRC63   | 1.09 | 0.216634 | 0.848 |
| LYAR     | 1.09 | 0.055785 | 0.613 |
| MRPS23   | 1.09 | 0.055785 | 0.613 |
| PIGN     | 1.09 | 0.055785 | 0.613 |
| POMT1    | 1.09 | 0.069394 | 0.659 |
| PPAPDC1B | 1.09 | 0.055785 | 0.613 |
| PTGDR    | 1.09 | 0.055785 | 0.613 |
| PTRH2    | 1.09 | 0.055785 | 0.613 |
| RAB35    | 1.09 | 0.055785 | 0.613 |
| RNF152   | 1.09 | 0.055786 | 0.613 |
| SDR42E1  | 1.09 | 0.055786 | 0.613 |
| SLC19A1  | 1.09 | 0.069394 | 0.659 |
| TOMM7    | 1.09 | 0.055786 | 0.613 |
| TTC9C    | 1.09 | 0.055785 | 0.613 |
| WIBG     | 1.09 | 0.069394 | 0.659 |
| ZNF275   | 1.09 | 0.055786 | 0.613 |
| ZNF823   | 1.09 | 0.055786 | 0.613 |
| ZZZ3     | 1.09 | 0.055785 | 0.613 |
| ACAD9    | 1.1  | 0.053673 | 0.609 |
| ACOX2    | 1.1  | 0.053673 | 0.609 |
| BBS12    | 1.1  | 0.053672 | 0.609 |
| BSG      | 1.1  | 0.083402 | 0.7   |
| COCH     | 1.1  | 0.053673 | 0.609 |
| FMR1NB   | 1.1  | 0.053673 | 0.609 |
| MRPL54   | 1.1  | 0.053672 | 0.609 |
| NHLRC3   | 1.1  | 0.053673 | 0.609 |
| OR2D3    | 1.1  | 0.066973 | 0.652 |
| PLAT     | 1.1  | 0.053673 | 0.609 |
| PSMA6    | 1.1  | 0.053672 | 0.609 |
| RAB11A   | 1.1  | 0.053673 | 0.609 |

|           |      |          |       |
|-----------|------|----------|-------|
| SPNS1     | 1.1  | 0.053673 | 0.609 |
| ASB4      | 1.11 | 0.051634 | 0.599 |
| C3        | 1.11 | 0.051634 | 0.599 |
| CHCHD3    | 1.11 | 0.051634 | 0.599 |
| DAPK3     | 1.11 | 0.051634 | 0.599 |
| DCAF12    | 1.11 | 0.051635 | 0.599 |
| DRD1      | 1.11 | 0.051634 | 0.599 |
| DYRK2     | 1.11 | 0.051634 | 0.599 |
| EBI3      | 1.11 | 0.06462  | 0.64  |
| ERVFRD-1  | 1.11 | 0.051635 | 0.599 |
| FAM105B   | 1.11 | 0.051634 | 0.599 |
| FCGRT     | 1.11 | 0.06462  | 0.64  |
| GJA9      | 1.11 | 0.051634 | 0.599 |
| GPR155    | 1.11 | 0.051635 | 0.599 |
| GPR37     | 1.11 | 0.051635 | 0.599 |
| HIST2H3D  | 1.11 | 0.051634 | 0.599 |
| LIG1      | 1.11 | 0.208666 | 0.846 |
| MANSC4    | 1.11 | 0.051635 | 0.599 |
| OR1L1     | 1.11 | 0.051634 | 0.599 |
| PILRB     | 1.11 | 0.064621 | 0.64  |
| PRPF40B   | 1.11 | 0.080734 | 0.69  |
| SCAF4     | 1.11 | 0.06462  | 0.64  |
| SPTLC3    | 1.11 | 0.051634 | 0.599 |
| WDR73     | 1.11 | 0.051635 | 0.599 |
| BTAF1     | 1.12 | 0.062383 | 0.631 |
| DIP2B     | 1.12 | 0.04966  | 0.593 |
| FAM19A5   | 1.12 | 0.04966  | 0.593 |
| GNG5      | 1.12 | 0.04966  | 0.593 |
| LYL1      | 1.12 | 0.04966  | 0.593 |
| MRPL40    | 1.12 | 0.04966  | 0.593 |
| N4BP1     | 1.12 | 0.04966  | 0.593 |
| OR1F1     | 1.12 | 0.062384 | 0.631 |
| PLEKHM3   | 1.12 | 0.049659 | 0.593 |
| PSMD13    | 1.12 | 0.04966  | 0.593 |
| S100A9    | 1.12 | 0.04966  | 0.593 |
| SLC31A2   | 1.12 | 0.04966  | 0.593 |
| SPATA20   | 1.12 | 0.04966  | 0.593 |
| TACC3     | 1.12 | 0.04966  | 0.593 |
| TMEM161B  | 1.12 | 0.04966  | 0.593 |
| WDR75     | 1.12 | 0.049659 | 0.593 |
| C14orf105 | 1.13 | 0.047762 | 0.587 |
| CCL15     | 1.13 | 0.047762 | 0.587 |
| CLUH      | 1.13 | 0.060165 | 0.622 |
| DPYSL3    | 1.13 | 0.060165 | 0.622 |
| EXTL2     | 1.13 | 0.047761 | 0.587 |
| GLP2R     | 1.13 | 0.060165 | 0.622 |
| HIAT1     | 1.13 | 0.047762 | 0.587 |

|           |      |          |       |
|-----------|------|----------|-------|
| MOB1A     | 1.13 | 0.047761 | 0.587 |
| NDUFAF2   | 1.13 | 0.047762 | 0.587 |
| NDUFC2-KC | 1.13 | 0.047761 | 0.587 |
| NT5C2     | 1.13 | 0.047761 | 0.587 |
| OR1N1     | 1.13 | 0.047762 | 0.587 |
| PLET1     | 1.13 | 0.060166 | 0.622 |
| RNASE7    | 1.13 | 0.047761 | 0.587 |
| RRP7A     | 1.13 | 0.060166 | 0.622 |
| TFB1M     | 1.13 | 0.047761 | 0.587 |
| TMEM202   | 1.13 | 0.047761 | 0.587 |
| ZNF512    | 1.13 | 0.047762 | 0.587 |
| ABHD10    | 1.14 | 0.058058 | 0.616 |
| ADAM21    | 1.14 | 0.045901 | 0.575 |
| BTBD16    | 1.14 | 0.045901 | 0.575 |
| C6        | 1.14 | 0.0459   | 0.575 |
| CCNH      | 1.14 | 0.0459   | 0.575 |
| FBXL4     | 1.14 | 0.045901 | 0.575 |
| HOXC12    | 1.14 | 0.07324  | 0.673 |
| HYPK      | 1.14 | 0.0459   | 0.575 |
| IL7       | 1.14 | 0.0459   | 0.575 |
| IPPK      | 1.14 | 0.0459   | 0.575 |
| MBD4      | 1.14 | 0.058058 | 0.616 |
| MZT2A     | 1.14 | 0.045901 | 0.575 |
| PDE7A     | 1.14 | 0.0459   | 0.575 |
| PLD6      | 1.14 | 0.0459   | 0.575 |
| RUNDC1    | 1.14 | 0.0459   | 0.575 |
| RUVBL2    | 1.14 | 0.152796 | 0.803 |
| TIMM17A   | 1.14 | 0.058058 | 0.616 |
| TRPM7     | 1.14 | 0.058058 | 0.616 |
| ANXA8L1   | 1.15 | 0.044094 | 0.562 |
| BRD8      | 1.15 | 0.055986 | 0.614 |
| CD74      | 1.15 | 0.044094 | 0.562 |
| CENPQ     | 1.15 | 0.044093 | 0.562 |
| COMMD3    | 1.15 | 0.044094 | 0.562 |
| COMMD5    | 1.15 | 0.044094 | 0.562 |
| FAM160A2  | 1.15 | 0.044093 | 0.562 |
| FEM1C     | 1.15 | 0.044094 | 0.562 |
| IRF2BPL   | 1.15 | 0.044094 | 0.562 |
| LIG3      | 1.15 | 0.044094 | 0.562 |
| LPGAT1    | 1.15 | 0.044094 | 0.562 |
| NDUFC2    | 1.15 | 0.044094 | 0.562 |
| PIK3R4    | 1.15 | 0.044094 | 0.562 |
| PLXND1    | 1.15 | 0.044094 | 0.562 |
| RBM47     | 1.15 | 0.044094 | 0.562 |
| SCN7A     | 1.15 | 0.044094 | 0.562 |
| SRRT      | 1.15 | 0.055986 | 0.614 |
| TTLL11    | 1.15 | 0.044094 | 0.562 |

|           |      |          |       |
|-----------|------|----------|-------|
| UGDH      | 1.15 | 0.044094 | 0.562 |
| VPS26A    | 1.15 | 0.044094 | 0.562 |
| AES       | 1.16 | 0.042388 | 0.558 |
| AP1B1     | 1.16 | 0.042388 | 0.558 |
| BTD       | 1.16 | 0.042387 | 0.558 |
| CASP12    | 1.16 | 0.042387 | 0.558 |
| CCDC102B  | 1.16 | 0.042387 | 0.558 |
| CKAP5     | 1.16 | 0.087488 | 0.708 |
| CYP19A1   | 1.16 | 0.042387 | 0.558 |
| DAZAP2    | 1.16 | 0.054001 | 0.61  |
| DTX3      | 1.16 | 0.054    | 0.61  |
| ENTPD5    | 1.16 | 0.042388 | 0.558 |
| GLTP      | 1.16 | 0.042388 | 0.558 |
| GPR126    | 1.16 | 0.042387 | 0.558 |
| HIST2H3C  | 1.16 | 0.042387 | 0.558 |
| LINC00452 | 1.16 | 0.042387 | 0.558 |
| NFXL1     | 1.16 | 0.042388 | 0.558 |
| NOB1      | 1.16 | 0.042387 | 0.558 |
| NRXN2     | 1.16 | 0.042388 | 0.558 |
| PUS1      | 1.16 | 0.054001 | 0.61  |
| RABIF     | 1.16 | 0.042388 | 0.558 |
| RELN      | 1.16 | 0.054    | 0.61  |
| RRAS2     | 1.16 | 0.042387 | 0.558 |
| SGPP2     | 1.16 | 0.042387 | 0.558 |
| SLC35E2   | 1.16 | 0.042387 | 0.558 |
| TADA2A    | 1.16 | 0.042387 | 0.558 |
| TATDN3    | 1.16 | 0.042387 | 0.558 |
| BCHE      | 1.17 | 0.040705 | 0.553 |
| C8orf46   | 1.17 | 0.040705 | 0.553 |
| CDK13     | 1.17 | 0.040705 | 0.553 |
| GSAP      | 1.17 | 0.040705 | 0.553 |
| HIST2H3A  | 1.17 | 0.040705 | 0.553 |
| HSF1      | 1.17 | 0.040704 | 0.553 |
| KCMF1     | 1.17 | 0.040705 | 0.553 |
| KRTAP1-5  | 1.17 | 0.052053 | 0.599 |
| MEAF6     | 1.17 | 0.052052 | 0.599 |
| MRPS12    | 1.17 | 0.040704 | 0.553 |
| OXR1      | 1.17 | 0.040705 | 0.553 |
| PRKDC     | 1.17 | 0.040705 | 0.553 |
| RREB1     | 1.17 | 0.052052 | 0.599 |
| SART1     | 1.17 | 0.1098   | 0.736 |
| SH3BGR    | 1.17 | 0.052052 | 0.599 |
| SNAPIN    | 1.17 | 0.040704 | 0.553 |
| SPATA18   | 1.17 | 0.052052 | 0.599 |
| VSTM4     | 1.17 | 0.040704 | 0.553 |
| WASF2     | 1.17 | 0.052052 | 0.599 |
| ZNF302    | 1.17 | 0.040705 | 0.553 |

|            |      |          |       |
|------------|------|----------|-------|
| ZSWIM8     | 1.17 | 0.040705 | 0.553 |
| AP1S3      | 1.18 | 0.050154 | 0.594 |
| B4GALT7    | 1.18 | 0.039093 | 0.547 |
| C19orf60   | 1.18 | 0.050153 | 0.594 |
| C9orf170   | 1.18 | 0.039092 | 0.547 |
| CYCS       | 1.18 | 0.039093 | 0.547 |
| DDX28      | 1.18 | 0.039093 | 0.547 |
| EIF3K      | 1.18 | 0.039093 | 0.547 |
| FBXO28     | 1.18 | 0.050153 | 0.594 |
| SLC35E2B   | 1.18 | 0.050153 | 0.594 |
| STARD3     | 1.18 | 0.050153 | 0.594 |
| UBR4       | 1.18 | 0.050154 | 0.594 |
| ZNF20      | 1.18 | 0.039092 | 0.547 |
| ANKRD33B   | 1.19 | 0.048316 | 0.587 |
| BTBD19     | 1.19 | 0.048317 | 0.587 |
| CCDC120    | 1.19 | 0.048317 | 0.587 |
| DDC        | 1.19 | 0.037561 | 0.533 |
| GTF2H1     | 1.19 | 0.037561 | 0.533 |
| HNRNPAB    | 1.19 | 0.03756  | 0.533 |
| ITCH       | 1.19 | 0.048316 | 0.587 |
| LOC1001276 | 1.19 | 0.048317 | 0.587 |
| LOC200726  | 1.19 | 0.048316 | 0.587 |
| PDE12      | 1.19 | 0.048316 | 0.587 |
| PLA2G12B   | 1.19 | 0.037561 | 0.533 |
| PNISR      | 1.19 | 0.037561 | 0.533 |
| RFPL4AL1   | 1.19 | 0.037561 | 0.533 |
| SPIN2B     | 1.19 | 0.048316 | 0.587 |
| SUMO2      | 1.19 | 0.062037 | 0.631 |
| TIMM44     | 1.19 | 0.037561 | 0.533 |
| UGT1A3     | 1.19 | 0.03756  | 0.533 |
| USP1       | 1.19 | 0.037561 | 0.533 |
| ZC3H6      | 1.19 | 0.037561 | 0.533 |
| ZNF235     | 1.19 | 0.03756  | 0.533 |
| ZNF276     | 1.19 | 0.037561 | 0.533 |
| ZNF574     | 1.19 | 0.062037 | 0.631 |
| ZNF646     | 1.19 | 0.048316 | 0.587 |
| ACP5       | 1.2  | 0.036059 | 0.524 |
| CWH43      | 1.2  | 0.036059 | 0.524 |
| EDEM1      | 1.2  | 0.036059 | 0.524 |
| FKBPL      | 1.2  | 0.036059 | 0.524 |
| FOXN3      | 1.2  | 0.036059 | 0.524 |
| FPR1       | 1.2  | 0.036059 | 0.524 |
| PFKFB4     | 1.2  | 0.046543 | 0.582 |
| PRPF4      | 1.2  | 0.077551 | 0.688 |
| PTCD2      | 1.2  | 0.036059 | 0.524 |
| RBMY1F     | 1.2  | 0.036059 | 0.524 |
| RHOQ       | 1.2  | 0.036059 | 0.524 |

|           |      |          |       |
|-----------|------|----------|-------|
| SERP2     | 1.2  | 0.036059 | 0.524 |
| SERPINA12 | 1.2  | 0.036059 | 0.524 |
| SMARCB1   | 1.2  | 0.036059 | 0.524 |
| TMED3     | 1.2  | 0.036059 | 0.524 |
| TNC       | 1.2  | 0.036059 | 0.524 |
| CNTRL     | 1.21 | 0.044812 | 0.57  |
| ENDOG     | 1.21 | 0.034612 | 0.517 |
| FAM193A   | 1.21 | 0.034612 | 0.517 |
| FBXO45    | 1.21 | 0.034612 | 0.517 |
| FOCAD     | 1.21 | 0.034612 | 0.517 |
| FXR1      | 1.21 | 0.034612 | 0.517 |
| GADL1     | 1.21 | 0.034613 | 0.517 |
| HAPLN2    | 1.21 | 0.034613 | 0.517 |
| KCNMA1    | 1.21 | 0.034612 | 0.517 |
| MED12     | 1.21 | 0.057973 | 0.616 |
| RBM12     | 1.21 | 0.034612 | 0.517 |
| SEPSECS   | 1.21 | 0.044812 | 0.57  |
| TMEM150C  | 1.21 | 0.034612 | 0.517 |
| TMEM39B   | 1.21 | 0.034613 | 0.517 |
| TUBB1     | 1.21 | 0.034613 | 0.517 |
| UEVLD     | 1.21 | 0.034613 | 0.517 |
| ZDHHC6    | 1.21 | 0.034612 | 0.517 |
| ACTR3     | 1.22 | 0.033205 | 0.51  |
| ALG1L     | 1.22 | 0.043173 | 0.562 |
| CACNA2D1  | 1.22 | 0.043174 | 0.562 |
| CCDC121   | 1.22 | 0.033205 | 0.51  |
| CCDC90B   | 1.22 | 0.033205 | 0.51  |
| CD99L2    | 1.22 | 0.033205 | 0.51  |
| CLDN7     | 1.22 | 0.033205 | 0.51  |
| DLG2      | 1.22 | 0.043173 | 0.562 |
| JAZF1     | 1.22 | 0.033205 | 0.51  |
| KCNE4     | 1.22 | 0.033205 | 0.51  |
| MEF2A     | 1.22 | 0.043174 | 0.562 |
| METTL17   | 1.22 | 0.043174 | 0.562 |
| MYC       | 1.22 | 0.127124 | 0.76  |
| NEIL1     | 1.22 | 0.043173 | 0.562 |
| OR6B3     | 1.22 | 0.033205 | 0.51  |
| PABPC1L2A | 1.22 | 0.033205 | 0.51  |
| PRKAG2    | 1.22 | 0.033205 | 0.51  |
| PTPRQ     | 1.22 | 0.033205 | 0.51  |
| RASGRP1   | 1.22 | 0.033205 | 0.51  |
| STAT4     | 1.22 | 0.033205 | 0.51  |
| TCEA3     | 1.22 | 0.033205 | 0.51  |
| TMSB15B   | 1.22 | 0.127124 | 0.76  |
| USP16     | 1.22 | 0.033205 | 0.51  |
| ARF4      | 1.23 | 0.031875 | 0.505 |
| ARF6      | 1.23 | 0.031874 | 0.505 |

|           |      |          |       |
|-----------|------|----------|-------|
| AVP       | 1.23 | 0.031875 | 0.505 |
| CBLN3     | 1.23 | 0.031875 | 0.505 |
| COMMD10   | 1.23 | 0.031875 | 0.505 |
| ENC1      | 1.23 | 0.031875 | 0.505 |
| GPR148    | 1.23 | 0.031875 | 0.505 |
| KCNG4     | 1.23 | 0.04156  | 0.558 |
| MFAP4     | 1.23 | 0.031875 | 0.505 |
| NOSTRIN   | 1.23 | 0.031875 | 0.505 |
| PABPC1L2B | 1.23 | 0.031875 | 0.505 |
| RABEP1    | 1.23 | 0.031875 | 0.505 |
| TMEM38A   | 1.23 | 0.031874 | 0.505 |
| ACTN4     | 1.24 | 0.030593 | 0.498 |
| ACTR3C    | 1.24 | 0.030593 | 0.498 |
| ADAM15    | 1.24 | 0.040047 | 0.553 |
| ADAM9     | 1.24 | 0.030592 | 0.498 |
| B3GNT8    | 1.24 | 0.030593 | 0.498 |
| CACNA1D   | 1.24 | 0.030593 | 0.498 |
| COPG1     | 1.24 | 0.052291 | 0.601 |
| DEFB112   | 1.24 | 0.040047 | 0.553 |
| DNAJC25   | 1.24 | 0.030593 | 0.498 |
| G6PC2     | 1.24 | 0.030593 | 0.498 |
| IQGAP2    | 1.24 | 0.030592 | 0.498 |
| KLHL8     | 1.24 | 0.030593 | 0.498 |
| LRRC73    | 1.24 | 0.040047 | 0.553 |
| PRR23A    | 1.24 | 0.040047 | 0.553 |
| RTN3      | 1.24 | 0.030593 | 0.498 |
| SIK3      | 1.24 | 0.040047 | 0.553 |
| SMYD3     | 1.24 | 0.030593 | 0.498 |
| AHCYL1    | 1.25 | 0.038524 | 0.543 |
| DCST2     | 1.25 | 0.029324 | 0.489 |
| DNAJC13   | 1.25 | 0.029324 | 0.489 |
| EPB41L4B  | 1.25 | 0.029324 | 0.489 |
| GTPBP10   | 1.25 | 0.029324 | 0.489 |
| HAUS3     | 1.25 | 0.050549 | 0.598 |
| NFATC2    | 1.25 | 0.029324 | 0.489 |
| OR12D3    | 1.25 | 0.038524 | 0.543 |
| RBM4B     | 1.25 | 0.038524 | 0.543 |
| RINL      | 1.25 | 0.029324 | 0.489 |
| RIPK4     | 1.25 | 0.029324 | 0.489 |
| RNASEH1   | 1.25 | 0.029324 | 0.489 |
| SLC38A8   | 1.25 | 0.029324 | 0.489 |
| STK39     | 1.25 | 0.029324 | 0.489 |
| TPGS1     | 1.25 | 0.029324 | 0.489 |
| ADAM33    | 1.26 | 0.02814  | 0.484 |
| CAT       | 1.26 | 0.02814  | 0.484 |
| CD83      | 1.26 | 0.02814  | 0.484 |
| CDC26     | 1.26 | 0.048792 | 0.593 |

|          |      |          |       |
|----------|------|----------|-------|
| CTSL     | 1.26 | 0.028141 | 0.484 |
| FAM114A2 | 1.26 | 0.02814  | 0.484 |
| GAL3ST4  | 1.26 | 0.037076 | 0.533 |
| GCNT7    | 1.26 | 0.037076 | 0.533 |
| HELQ     | 1.26 | 0.028141 | 0.484 |
| LGI3     | 1.26 | 0.02814  | 0.484 |
| MKKS     | 1.26 | 0.02814  | 0.484 |
| MUM1     | 1.26 | 0.037076 | 0.533 |
| OMA1     | 1.26 | 0.028141 | 0.484 |
| PCED1B   | 1.26 | 0.02814  | 0.484 |
| PRPF38A  | 1.26 | 0.02814  | 0.484 |
| QSER1    | 1.26 | 0.02814  | 0.484 |
| S100PBP  | 1.26 | 0.02814  | 0.484 |
| TAF11    | 1.26 | 0.02814  | 0.484 |
| TIMM10B  | 1.26 | 0.02814  | 0.484 |
| TMEM243  | 1.26 | 0.028141 | 0.484 |
| UTS2B    | 1.26 | 0.02814  | 0.484 |
| YY1      | 1.26 | 0.037076 | 0.533 |
| ARMC6    | 1.27 | 0.027023 | 0.484 |
| ATP8A2   | 1.27 | 0.027023 | 0.484 |
| EFNA5    | 1.27 | 0.035675 | 0.524 |
| MCTP1    | 1.27 | 0.027022 | 0.484 |
| PCDHB3   | 1.27 | 0.027023 | 0.484 |
| RSPRY1   | 1.27 | 0.035675 | 0.524 |
| SARNP    | 1.27 | 0.027023 | 0.484 |
| VPS13B   | 1.27 | 0.027023 | 0.484 |
| ARHGEF10 | 1.28 | 0.034313 | 0.517 |
| ASAH1    | 1.28 | 0.025912 | 0.473 |
| BOC      | 1.28 | 0.025912 | 0.473 |
| C6orf203 | 1.28 | 0.025912 | 0.473 |
| CD320    | 1.28 | 0.025913 | 0.473 |
| DNAI1    | 1.28 | 0.025913 | 0.473 |
| MRPL12   | 1.28 | 0.025912 | 0.473 |
| MTCH2    | 1.28 | 0.034313 | 0.517 |
| NMT1     | 1.28 | 0.025913 | 0.473 |
| NSUN2    | 1.28 | 0.025912 | 0.473 |
| OS9      | 1.28 | 0.025912 | 0.473 |
| POLR2F   | 1.28 | 0.060636 | 0.625 |
| RIMS4    | 1.28 | 0.025913 | 0.473 |
| TIGD2    | 1.28 | 0.025912 | 0.473 |
| TIMMDC1  | 1.28 | 0.025913 | 0.473 |
| YTHDC2   | 1.28 | 0.034313 | 0.517 |
| ZC3H18   | 1.28 | 0.034314 | 0.517 |
| C2orf44  | 1.29 | 0.02482  | 0.468 |
| C8orf59  | 1.29 | 0.079326 | 0.69  |
| CUL1     | 1.29 | 0.02482  | 0.468 |
| DNAJA2   | 1.29 | 0.03302  | 0.51  |

|          |      |          |       |
|----------|------|----------|-------|
| LRRC40   | 1.29 | 0.02482  | 0.468 |
| MED23    | 1.29 | 0.02482  | 0.468 |
| OR5P2    | 1.29 | 0.02482  | 0.468 |
| STK11    | 1.29 | 0.033021 | 0.51  |
| TAZ      | 1.29 | 0.043931 | 0.562 |
| ZNF544   | 1.29 | 0.02482  | 0.468 |
| BRAF     | 1.3  | 0.023786 | 0.458 |
| EHMT1    | 1.3  | 0.023787 | 0.458 |
| ENDOD1   | 1.3  | 0.023787 | 0.458 |
| EXOSC3   | 1.3  | 0.031743 | 0.505 |
| H2AFZ    | 1.3  | 0.023787 | 0.458 |
| NRCAM    | 1.3  | 0.031743 | 0.505 |
| RNF17    | 1.3  | 0.023786 | 0.458 |
| SNRPB2   | 1.3  | 0.023787 | 0.458 |
| SNX31    | 1.3  | 0.023787 | 0.458 |
| TRAF7    | 1.3  | 0.023787 | 0.458 |
| UQCRH    | 1.3  | 0.031743 | 0.505 |
| UROC1    | 1.3  | 0.023787 | 0.458 |
| VPS18    | 1.3  | 0.023787 | 0.458 |
| CDK20    | 1.31 | 0.022793 | 0.448 |
| ETV3     | 1.31 | 0.022793 | 0.448 |
| FAM92A1  | 1.31 | 0.022793 | 0.448 |
| GARS     | 1.31 | 0.074998 | 0.68  |
| HEATR5B  | 1.31 | 0.022792 | 0.448 |
| HSD17B4  | 1.31 | 0.022793 | 0.448 |
| MRPL21   | 1.31 | 0.022792 | 0.448 |
| PAQR9    | 1.31 | 0.030513 | 0.498 |
| PHF17    | 1.31 | 0.022793 | 0.448 |
| POLR2H   | 1.31 | 0.022792 | 0.448 |
| RAB5C    | 1.31 | 0.022793 | 0.448 |
| RPL35A   | 1.31 | 0.102639 | 0.727 |
| SCG2     | 1.31 | 0.022793 | 0.448 |
| SCNN1B   | 1.31 | 0.022793 | 0.448 |
| SMG7     | 1.31 | 0.030514 | 0.498 |
| TCEAL6   | 1.31 | 0.022793 | 0.448 |
| TRNAU1AP | 1.31 | 0.022792 | 0.448 |
| UBR5     | 1.31 | 0.022793 | 0.448 |
| UGT1A10  | 1.31 | 0.022792 | 0.448 |
| ANXA8L2  | 1.32 | 0.02181  | 0.448 |
| ATP11C   | 1.32 | 0.029324 | 0.489 |
| CDK15    | 1.32 | 0.02181  | 0.448 |
| CXCR4    | 1.32 | 0.021809 | 0.448 |
| DNAH1    | 1.32 | 0.029323 | 0.489 |
| GPR34    | 1.32 | 0.029324 | 0.489 |
| HEPACAM2 | 1.32 | 0.029323 | 0.489 |
| HMOX2    | 1.32 | 0.02181  | 0.448 |
| KCNS1    | 1.32 | 0.02181  | 0.448 |

|          |      |          |       |
|----------|------|----------|-------|
| KIAA0196 | 1.32 | 0.021809 | 0.448 |
| KLHL25   | 1.32 | 0.021809 | 0.448 |
| KLHL5    | 1.32 | 0.02181  | 0.448 |
| PHF2     | 1.32 | 0.039513 | 0.551 |
| RAB25    | 1.32 | 0.02181  | 0.448 |
| RPL26L1  | 1.32 | 0.02181  | 0.448 |
| SSBP1    | 1.32 | 0.029323 | 0.489 |
| ZDHHC16  | 1.32 | 0.029323 | 0.489 |
| ZMYM4    | 1.32 | 0.02181  | 0.448 |
| AKAP5    | 1.33 | 0.020881 | 0.445 |
| KDM6B    | 1.33 | 0.028173 | 0.484 |
| MTF1     | 1.33 | 0.028173 | 0.484 |
| MYADML2  | 1.33 | 0.020882 | 0.445 |
| NDUFA12  | 1.33 | 0.020882 | 0.445 |
| NONO     | 1.33 | 0.028174 | 0.484 |
| OR2B11   | 1.33 | 0.028173 | 0.484 |
| PELI1    | 1.33 | 0.020881 | 0.445 |
| RSPH4A   | 1.33 | 0.03813  | 0.54  |
| TROVE2   | 1.33 | 0.020881 | 0.445 |
| TXNDC11  | 1.33 | 0.028173 | 0.484 |
| ATP7B    | 1.34 | 0.020006 | 0.432 |
| C11orf58 | 1.34 | 0.020006 | 0.432 |
| CCNJ     | 1.34 | 0.020006 | 0.432 |
| DTL      | 1.34 | 0.027088 | 0.484 |
| EIF3A    | 1.34 | 0.020007 | 0.432 |
| FAM13C   | 1.34 | 0.020006 | 0.432 |
| GPALPP1  | 1.34 | 0.020006 | 0.432 |
| GRAMD1A  | 1.34 | 0.020006 | 0.432 |
| MIR1199  | 1.34 | 0.020007 | 0.432 |
| MRPS5    | 1.34 | 0.020006 | 0.432 |
| PIK3R1   | 1.34 | 0.020007 | 0.432 |
| PPP1R15B | 1.34 | 0.020007 | 0.432 |
| PURG     | 1.34 | 0.020006 | 0.432 |
| SLC39A11 | 1.34 | 0.020006 | 0.432 |
| TAGLN    | 1.34 | 0.027087 | 0.484 |
| THY1     | 1.34 | 0.020007 | 0.432 |
| TRMT10A  | 1.34 | 0.020006 | 0.432 |
| ZNF608   | 1.34 | 0.020006 | 0.432 |
| GLI2     | 1.35 | 0.019159 | 0.429 |
| ISM1     | 1.35 | 0.019158 | 0.429 |
| NME6     | 1.35 | 0.019158 | 0.429 |
| NPSR1    | 1.35 | 0.019159 | 0.429 |
| PLCD3    | 1.35 | 0.026025 | 0.473 |
| PTPLB    | 1.35 | 0.019159 | 0.429 |
| SRPX2    | 1.35 | 0.026025 | 0.473 |
| ST7      | 1.35 | 0.019159 | 0.429 |
| TESK1    | 1.35 | 0.019158 | 0.429 |

|          |      |          |       |
|----------|------|----------|-------|
| UGT1A9   | 1.35 | 0.019159 | 0.429 |
| WDR43    | 1.35 | 0.035487 | 0.524 |
| CHAD     | 1.36 | 0.018346 | 0.423 |
| EIF3G    | 1.36 | 0.025021 | 0.468 |
| MAML1    | 1.36 | 0.018346 | 0.423 |
| MPZL1    | 1.36 | 0.018346 | 0.423 |
| NDUFA13  | 1.36 | 0.025021 | 0.468 |
| NRIP2    | 1.36 | 0.025021 | 0.468 |
| PCDHGA3  | 1.36 | 0.018346 | 0.423 |
| PEBP4    | 1.36 | 0.025021 | 0.468 |
| PLD3     | 1.36 | 0.018347 | 0.423 |
| UBE2Q2L  | 1.36 | 0.090966 | 0.708 |
| DMTF1    | 1.37 | 0.024026 | 0.46  |
| DPRX     | 1.37 | 0.017523 | 0.413 |
| DTD2     | 1.37 | 0.017522 | 0.413 |
| INTS6    | 1.37 | 0.032999 | 0.51  |
| NT5M     | 1.37 | 0.017522 | 0.413 |
| PCOLCE   | 1.37 | 0.024026 | 0.46  |
| PDCL     | 1.37 | 0.017523 | 0.413 |
| PES1     | 1.37 | 0.06326  | 0.636 |
| PET112   | 1.37 | 0.017523 | 0.413 |
| PPA1     | 1.37 | 0.033    | 0.51  |
| PUM1     | 1.37 | 0.017523 | 0.413 |
| RAB5B    | 1.37 | 0.017522 | 0.413 |
| STK35    | 1.37 | 0.017523 | 0.413 |
| VPS26B   | 1.37 | 0.017523 | 0.413 |
| C19orf43 | 1.38 | 0.02308  | 0.453 |
| ID3      | 1.38 | 0.016748 | 0.404 |
| PKD2L2   | 1.38 | 0.016748 | 0.404 |
| PNPLA2   | 1.38 | 0.016748 | 0.404 |
| RALGPS1  | 1.38 | 0.016748 | 0.404 |
| SIAE     | 1.38 | 0.016748 | 0.404 |
| AATK     | 1.39 | 0.016017 | 0.391 |
| ACACB    | 1.39 | 0.016018 | 0.391 |
| KAT2A    | 1.39 | 0.016017 | 0.391 |
| LGALSL   | 1.39 | 0.022154 | 0.448 |
| NNT      | 1.39 | 0.022154 | 0.448 |
| PDCD11   | 1.39 | 0.030681 | 0.498 |
| PRDM8    | 1.39 | 0.016018 | 0.391 |
| RANBP9   | 1.39 | 0.016017 | 0.391 |
| SLC3A2   | 1.39 | 0.016017 | 0.391 |
| STK3     | 1.39 | 0.022154 | 0.448 |
| TMEM88B  | 1.39 | 0.022154 | 0.448 |
| ZMYND11  | 1.39 | 0.016017 | 0.391 |
| ARHGEF35 | 1.4  | 0.029576 | 0.492 |
| ATP2C2   | 1.4  | 0.015338 | 0.383 |
| BHLHA15  | 1.4  | 0.015338 | 0.383 |

|          |      |          |       |
|----------|------|----------|-------|
| EGR4     | 1.4  | 0.015338 | 0.383 |
| EPB41L3  | 1.4  | 0.021284 | 0.448 |
| ERG      | 1.4  | 0.015338 | 0.383 |
| FOXRED1  | 1.4  | 0.021284 | 0.448 |
| G0S2     | 1.4  | 0.015338 | 0.383 |
| IER2     | 1.4  | 0.021284 | 0.448 |
| KCNV2    | 1.4  | 0.021285 | 0.448 |
| LRRC8A   | 1.4  | 0.015338 | 0.383 |
| POLR2L   | 1.4  | 0.041129 | 0.558 |
| RAB21    | 1.4  | 0.015338 | 0.383 |
| RBM41    | 1.4  | 0.015338 | 0.383 |
| SSSCA1   | 1.4  | 0.015338 | 0.383 |
| VAX1     | 1.4  | 0.015338 | 0.383 |
| C22orf31 | 1.41 | 0.020462 | 0.44  |
| MAP3K3   | 1.41 | 0.014635 | 0.378 |
| REXO4    | 1.41 | 0.014634 | 0.378 |
| TMEM261  | 1.41 | 0.014635 | 0.378 |
| ATF4     | 1.42 | 0.013997 | 0.367 |
| SLC46A2  | 1.42 | 0.013997 | 0.367 |
| TEX101   | 1.42 | 0.013997 | 0.367 |
| TRHDE    | 1.42 | 0.013997 | 0.367 |
| TTC37    | 1.42 | 0.013997 | 0.367 |
| TYW3     | 1.42 | 0.013997 | 0.367 |
| AQP10    | 1.43 | 0.018826 | 0.429 |
| ATXN3L   | 1.43 | 0.01336  | 0.358 |
| B3GALT6  | 1.43 | 0.018826 | 0.429 |
| CPT1B    | 1.43 | 0.01336  | 0.358 |
| FAM136A  | 1.43 | 0.018827 | 0.429 |
| FLOT2    | 1.43 | 0.01336  | 0.358 |
| NPLOC4   | 1.43 | 0.026455 | 0.48  |
| NXPE3    | 1.43 | 0.013359 | 0.358 |
| POLR2D   | 1.43 | 0.018827 | 0.429 |
| PTS      | 1.43 | 0.01336  | 0.358 |
| RPS25    | 1.43 | 0.01336  | 0.358 |
| CROT     | 1.44 | 0.012757 | 0.349 |
| CRTAP    | 1.44 | 0.012756 | 0.349 |
| EXOSC9   | 1.44 | 0.012757 | 0.349 |
| GJA10    | 1.44 | 0.018071 | 0.421 |
| GNA14    | 1.44 | 0.012756 | 0.349 |
| ING3     | 1.44 | 0.012756 | 0.349 |
| NIIPB8   | 1.44 | 0.036066 | 0.524 |
| RPS29    | 1.44 | 0.025472 | 0.473 |
| UGT1A4   | 1.44 | 0.012757 | 0.349 |
| ZBTB17   | 1.44 | 0.018071 | 0.421 |
| APBB1IP  | 1.45 | 0.012193 | 0.34  |
| DEK      | 1.45 | 0.017346 | 0.413 |
| KAT6A    | 1.45 | 0.012193 | 0.34  |

|           |      |          |       |
|-----------|------|----------|-------|
| LRR1      | 1.45 | 0.03487  | 0.52  |
| PAN3      | 1.45 | 0.012193 | 0.34  |
| PRKCE     | 1.45 | 0.012193 | 0.34  |
| PRRC1     | 1.45 | 0.024535 | 0.468 |
| VPS45     | 1.45 | 0.012192 | 0.34  |
| YBEY      | 1.45 | 0.012192 | 0.34  |
| ZNF117    | 1.45 | 0.012193 | 0.34  |
| CGGBP1    | 1.46 | 0.011644 | 0.334 |
| KRT79     | 1.46 | 0.011645 | 0.334 |
| P4HB      | 1.46 | 0.011645 | 0.334 |
| PHF13     | 1.46 | 0.011644 | 0.334 |
| RAB10     | 1.46 | 0.011644 | 0.334 |
| TBC1D9    | 1.46 | 0.011644 | 0.334 |
| UBE2J1    | 1.46 | 0.011645 | 0.334 |
| MBTD1     | 1.47 | 0.015955 | 0.391 |
| RAB13     | 1.47 | 0.011131 | 0.327 |
| WARS2     | 1.47 | 0.011131 | 0.327 |
| ZBTB37    | 1.47 | 0.011131 | 0.327 |
| ABHD5     | 1.48 | 0.015307 | 0.383 |
| EPC1      | 1.48 | 0.010629 | 0.319 |
| GMEB1     | 1.48 | 0.015307 | 0.383 |
| HIST1H4F  | 1.48 | 0.010628 | 0.319 |
| PPWD1     | 1.48 | 0.021896 | 0.448 |
| TSPAN18   | 1.48 | 0.010629 | 0.319 |
| XPNPEP3   | 1.48 | 0.010629 | 0.319 |
| CELF1     | 1.49 | 0.010147 | 0.309 |
| FAM160B2  | 1.49 | 0.014671 | 0.378 |
| FILIP1    | 1.49 | 0.010147 | 0.309 |
| FPGT      | 1.49 | 0.010148 | 0.309 |
| HAL       | 1.49 | 0.010148 | 0.309 |
| KDM2A     | 1.49 | 0.010148 | 0.309 |
| PPM1G     | 1.49 | 0.014671 | 0.378 |
| PRKACA    | 1.49 | 0.010148 | 0.309 |
| SLC35B2   | 1.49 | 0.010148 | 0.309 |
| SPATA31C1 | 1.49 | 0.014671 | 0.378 |
| ANKRD40   | 1.5  | 0.029454 | 0.49  |
| C8orf86   | 1.5  | 0.009688 | 0.304 |
| KDSR      | 1.5  | 0.009688 | 0.304 |
| XPOT      | 1.5  | 0.009688 | 0.304 |
| C1QBP     | 1.51 | 0.009227 | 0.294 |
| MAP1LC3B  | 1.51 | 0.009227 | 0.294 |
| PRKD2     | 1.51 | 0.013466 | 0.359 |
| PRMT10    | 1.51 | 0.009228 | 0.294 |
| ZEB2      | 1.51 | 0.009227 | 0.294 |
| AGPAT3    | 1.52 | 0.008789 | 0.284 |
| BRPF1     | 1.52 | 0.00879  | 0.284 |
| CHAC2     | 1.52 | 0.00879  | 0.284 |

|          |      |          |       |
|----------|------|----------|-------|
| CLDN15   | 1.52 | 0.012904 | 0.351 |
| EXOC7    | 1.52 | 0.00879  | 0.284 |
| FAM160A1 | 1.52 | 0.00879  | 0.284 |
| KIAA0947 | 1.52 | 0.012904 | 0.351 |
| PDILT    | 1.52 | 0.00879  | 0.284 |
| SMAP2    | 1.52 | 0.008789 | 0.284 |
| CCDC147  | 1.53 | 0.008387 | 0.279 |
| COPB1    | 1.53 | 0.039377 | 0.55  |
| LPCAT3   | 1.53 | 0.008387 | 0.279 |
| MED13    | 1.53 | 0.012367 | 0.344 |
| PLIN5    | 1.53 | 0.008387 | 0.279 |
| S1PR5    | 1.53 | 0.008387 | 0.279 |
| SNRK     | 1.53 | 0.008387 | 0.279 |
| TET2     | 1.53 | 0.008387 | 0.279 |
| ABHD11   | 1.54 | 0.008003 | 0.271 |
| ACOX1    | 1.54 | 0.008003 | 0.271 |
| BEX5     | 1.54 | 0.011855 | 0.339 |
| HAVCR2   | 1.54 | 0.008003 | 0.271 |
| MID1     | 1.54 | 0.008002 | 0.271 |
| NPIPA7   | 1.54 | 0.008003 | 0.271 |
| NPIPA8   | 1.54 | 0.008003 | 0.271 |
| OR2A14   | 1.54 | 0.008003 | 0.271 |
| PRKAG1   | 1.54 | 0.008003 | 0.271 |
| SMC2     | 1.54 | 0.025628 | 0.473 |
| STARD3NL | 1.54 | 0.008003 | 0.271 |
| BTNL8    | 1.55 | 0.007622 | 0.267 |
| C2orf49  | 1.55 | 0.007623 | 0.267 |
| CCDC22   | 1.55 | 0.007623 | 0.267 |
| KEL      | 1.55 | 0.007623 | 0.267 |
| OR51G1   | 1.55 | 0.007622 | 0.267 |
| SYVN1    | 1.55 | 0.024761 | 0.468 |
| WRAP73   | 1.55 | 0.007623 | 0.267 |
| ADCK4    | 1.56 | 0.010859 | 0.321 |
| ATXN7L3  | 1.56 | 0.01086  | 0.321 |
| DCAF15   | 1.56 | 0.01086  | 0.321 |
| DDX46    | 1.56 | 0.08338  | 0.7   |
| METTL5   | 1.56 | 0.007265 | 0.265 |
| RAF1     | 1.56 | 0.007266 | 0.265 |
| TFPT     | 1.56 | 0.01086  | 0.321 |
| THRA     | 1.56 | 0.007265 | 0.265 |
| TMEM185A | 1.56 | 0.007265 | 0.265 |
| C1R      | 1.57 | 0.006924 | 0.258 |
| NT5DC3   | 1.57 | 0.006924 | 0.258 |
| RAB44    | 1.57 | 0.015449 | 0.385 |
| CCDC57   | 1.58 | 0.009948 | 0.309 |
| DLGAP4   | 1.58 | 0.006617 | 0.25  |
| GOLGA6L3 | 1.58 | 0.006618 | 0.25  |

|           |      |          |       |
|-----------|------|----------|-------|
| KLF6      | 1.58 | 0.006618 | 0.25  |
| MLST8     | 1.58 | 0.009948 | 0.309 |
| PPP4R2    | 1.58 | 0.009948 | 0.309 |
| SLPI      | 1.58 | 0.006618 | 0.25  |
| TAF13     | 1.58 | 0.006618 | 0.25  |
| EIF4A3    | 1.59 | 0.021508 | 0.448 |
| MTIF2     | 1.59 | 0.00631  | 0.246 |
| PDIA6     | 1.59 | 0.006311 | 0.246 |
| ZMYND8    | 1.59 | 0.009507 | 0.302 |
| ASXL2     | 1.6  | 0.00601  | 0.237 |
| DNAJB3    | 1.6  | 0.00601  | 0.237 |
| FTSJ2     | 1.6  | 0.009091 | 0.293 |
| TMEM104   | 1.6  | 0.013733 | 0.366 |
| CTDSPL2   | 1.61 | 0.005727 | 0.227 |
| PELP1     | 1.61 | 0.020012 | 0.432 |
| RAB9A     | 1.61 | 0.005727 | 0.227 |
| RPS17     | 1.61 | 0.005727 | 0.227 |
| ZNF181    | 1.61 | 0.005727 | 0.227 |
| CDC73     | 1.62 | 0.005455 | 0.22  |
| HSPA2     | 1.62 | 0.005455 | 0.22  |
| MAP6D1    | 1.62 | 0.005455 | 0.22  |
| ZNF334    | 1.62 | 0.005455 | 0.22  |
| DAZAP1    | 1.63 | 0.005189 | 0.213 |
| HS3ST4    | 1.63 | 0.012169 | 0.34  |
| HYAL4     | 1.63 | 0.005188 | 0.213 |
| DDIT3     | 1.64 | 0.007625 | 0.267 |
| HMGB2     | 1.64 | 0.004938 | 0.204 |
| JAGN1     | 1.64 | 0.004938 | 0.204 |
| MGAT5     | 1.64 | 0.004939 | 0.204 |
| NOTCH2    | 1.64 | 0.007625 | 0.267 |
| OR52N2    | 1.64 | 0.004938 | 0.204 |
| PIKFYVE   | 1.64 | 0.004939 | 0.204 |
| PRPF19    | 1.64 | 0.017992 | 0.421 |
| TCN1      | 1.64 | 0.004939 | 0.204 |
| TMEM139   | 1.64 | 0.007624 | 0.267 |
| UBE3C     | 1.64 | 0.004938 | 0.204 |
| ZCCHC14   | 1.64 | 0.004938 | 0.204 |
| ZNF652    | 1.64 | 0.007625 | 0.267 |
| AGPAT5    | 1.65 | 0.007277 | 0.265 |
| CASP2     | 1.65 | 0.004699 | 0.203 |
| HHLA2     | 1.65 | 0.0047   | 0.203 |
| KRTAP10-6 | 1.65 | 0.011237 | 0.329 |
| PAN2      | 1.65 | 0.0047   | 0.203 |
| PCIF1     | 1.65 | 0.004699 | 0.203 |
| RABL6     | 1.65 | 0.004699 | 0.203 |
| ACOT7     | 1.66 | 0.004477 | 0.2   |
| BTF3      | 1.66 | 0.004476 | 0.2   |

|           |      |          |       |
|-----------|------|----------|-------|
| DLGAP2    | 1.66 | 0.004476 | 0.2   |
| MBOAT7    | 1.66 | 0.004477 | 0.2   |
| AGBL3     | 1.67 | 0.004249 | 0.194 |
| ICT1      | 1.67 | 0.004248 | 0.194 |
| RHOT1     | 1.67 | 0.004248 | 0.194 |
| SERP1     | 1.67 | 0.004248 | 0.194 |
| USP22     | 1.67 | 0.004248 | 0.194 |
| LRRC1     | 1.68 | 0.004046 | 0.19  |
| MPV17L2   | 1.68 | 0.004046 | 0.19  |
| PAPSS1    | 1.68 | 0.006366 | 0.246 |
| VPS29     | 1.68 | 0.006366 | 0.246 |
| AFF4      | 1.69 | 0.00385  | 0.184 |
| MEF2C     | 1.69 | 0.006083 | 0.239 |
| TFCP2     | 1.69 | 0.00385  | 0.184 |
| CLPB      | 1.7  | 0.00367  | 0.18  |
| CMTR1     | 1.7  | 0.00367  | 0.18  |
| NCSTN     | 1.7  | 0.00367  | 0.18  |
| PSENN     | 1.7  | 0.00367  | 0.18  |
| AP1M1     | 1.71 | 0.00349  | 0.175 |
| PSMC3     | 1.71 | 0.022327 | 0.448 |
| SF3B3     | 1.71 | 0.022327 | 0.448 |
| SREK1     | 1.71 | 0.00349  | 0.175 |
| UQCC2     | 1.71 | 0.008775 | 0.284 |
| DNTTIP2   | 1.72 | 0.003323 | 0.169 |
| GTPBP8    | 1.72 | 0.003323 | 0.169 |
| HIF3A     | 1.72 | 0.003324 | 0.169 |
| PGAM2     | 1.72 | 0.003323 | 0.169 |
| SMC1B     | 1.72 | 0.003324 | 0.169 |
| GNS       | 1.73 | 0.003155 | 0.167 |
| ASPM      | 1.74 | 0.004828 | 0.204 |
| CTTNBP2NL | 1.74 | 0.002996 | 0.16  |
| EBF1      | 1.74 | 0.004827 | 0.204 |
| SUV420H1  | 1.74 | 0.002996 | 0.16  |
| ART4      | 1.75 | 0.002849 | 0.154 |
| ASXL1     | 1.75 | 0.002849 | 0.154 |
| GALE      | 1.75 | 0.002849 | 0.154 |
| POLR2G    | 1.75 | 0.004602 | 0.203 |
| SLC9B2    | 1.75 | 0.002848 | 0.154 |
| TLE4      | 1.75 | 0.004602 | 0.203 |
| EIF3L     | 1.76 | 0.007105 | 0.264 |
| MRPS7     | 1.76 | 0.004396 | 0.2   |
| IKZF3     | 1.77 | 0.002576 | 0.144 |
| REXO2     | 1.77 | 0.002576 | 0.144 |
| SS18L2    | 1.77 | 0.006805 | 0.256 |
| USP19     | 1.77 | 0.004204 | 0.194 |
| ZCCHC17   | 1.77 | 0.002576 | 0.144 |
| ABHD3     | 1.78 | 0.00401  | 0.19  |

|          |      |          |       |
|----------|------|----------|-------|
| CYLD     | 1.78 | 0.002439 | 0.138 |
| POLG2    | 1.78 | 0.00244  | 0.138 |
| RPS17L   | 1.78 | 0.006517 | 0.25  |
| TRRAP    | 1.78 | 0.010726 | 0.321 |
| ZNF592   | 1.78 | 0.00401  | 0.19  |
| COQ6     | 1.79 | 0.003827 | 0.184 |
| IDI1     | 1.79 | 0.002311 | 0.135 |
| INO80E   | 1.79 | 0.003826 | 0.184 |
| PRKAA1   | 1.79 | 0.002311 | 0.135 |
| RFX5     | 1.79 | 0.003827 | 0.184 |
| ZNF628   | 1.79 | 0.002311 | 0.135 |
| BPHL     | 1.8  | 0.002193 | 0.132 |
| POLR2I   | 1.8  | 0.002193 | 0.132 |
| SDR16C5  | 1.8  | 0.002193 | 0.132 |
| TRIM28   | 1.8  | 0.002193 | 0.132 |
| ABCB5    | 1.82 | 0.001972 | 0.124 |
| ANKRD17  | 1.82 | 0.001971 | 0.124 |
| EPC2     | 1.82 | 0.003317 | 0.169 |
| FOXK1    | 1.82 | 0.001971 | 0.124 |
| PCK2     | 1.82 | 0.001972 | 0.124 |
| POP5     | 1.82 | 0.003317 | 0.169 |
| NAA15    | 1.83 | 0.003163 | 0.167 |
| NDRG2    | 1.83 | 0.001866 | 0.121 |
| OTX1     | 1.83 | 0.001866 | 0.121 |
| SLC10A4  | 1.84 | 0.001758 | 0.116 |
| GPR87    | 1.85 | 0.001671 | 0.111 |
| TTC9     | 1.85 | 0.001671 | 0.111 |
| SP1      | 1.86 | 0.001583 | 0.108 |
| METTL1   | 1.87 | 0.002599 | 0.144 |
| TMSB15A  | 1.87 | 0.007599 | 0.267 |
| ZNF644   | 1.87 | 0.001499 | 0.104 |
| UROS     | 1.88 | 0.001415 | 0.1   |
| PTPMT1   | 1.89 | 0.002344 | 0.135 |
| RLBP1    | 1.89 | 0.002345 | 0.135 |
| UBALD2   | 1.89 | 0.002344 | 0.135 |
| TAS2R19  | 1.9  | 0.001276 | 0.091 |
| CDV3     | 1.91 | 0.001209 | 0.087 |
| EMC3     | 1.91 | 0.001209 | 0.087 |
| FTSJ1    | 1.91 | 0.00121  | 0.087 |
| PGAP2    | 1.91 | 0.001209 | 0.087 |
| QRICH1   | 1.91 | 0.002132 | 0.132 |
| STRADA   | 1.91 | 0.002132 | 0.132 |
| TP53TG3D | 1.91 | 0.002133 | 0.132 |
| C2orf68  | 1.95 | 0.00098  | 0.074 |
| DOK1     | 1.95 | 0.00098  | 0.074 |
| ING5     | 1.95 | 0.00098  | 0.074 |
| CCDC53   | 1.96 | 0.00166  | 0.111 |

|          |      |          |       |
|----------|------|----------|-------|
| MARCH6   | 1.96 | 0.000929 | 0.072 |
| PSMD3    | 1.96 | 0.017759 | 0.417 |
| ALDH18A1 | 1.97 | 0.001576 | 0.108 |
| LRP1B    | 1.97 | 0.000881 | 0.069 |
| NAGLU    | 1.97 | 0.000881 | 0.069 |
| NRG2     | 1.97 | 0.000882 | 0.069 |
| PACS2    | 1.98 | 0.000833 | 0.066 |
| ACTL6A   | 1.99 | 0.002656 | 0.146 |
| CAPRIN1  | 1.99 | 0.000788 | 0.064 |
| GATA3    | 1.99 | 0.000788 | 0.064 |
| PQBP1    | 1.99 | 0.000788 | 0.064 |
| R3HCC1L  | 1.99 | 0.000788 | 0.064 |
| RPRD2    | 1.99 | 0.000788 | 0.064 |
| GID8     | 2    | 0.000747 | 0.063 |
| MTHFD2   | 2    | 0.000747 | 0.063 |
| HEATR2   | 2.02 | 0.001222 | 0.087 |
| MAT2B    | 2.02 | 0.000665 | 0.057 |
| PDS5A    | 2.02 | 0.000665 | 0.057 |
| B3GALTL  | 2.03 | 0.002216 | 0.133 |
| HERC1    | 2.03 | 0.001163 | 0.087 |
| KIAA1033 | 2.03 | 0.000629 | 0.055 |
| MID1IP1  | 2.04 | 0.000597 | 0.053 |
| PITRM1   | 2.04 | 0.000597 | 0.053 |
| HELLS    | 2.05 | 0.000564 | 0.052 |
| PARN     | 2.05 | 0.000564 | 0.052 |
| XPNPEP1  | 2.06 | 0.000532 | 0.05  |
| RETN     | 2.08 | 0.000473 | 0.045 |
| MAP2K5   | 2.09 | 0.000446 | 0.044 |
| NCBP1    | 2.09 | 0.001685 | 0.112 |
| UBE2G2   | 2.09 | 0.000446 | 0.044 |
| CNBP     | 2.1  | 0.000422 | 0.042 |
| SPAG7    | 2.11 | 0.000397 | 0.04  |
| C10orf12 | 2.12 | 0.000373 | 0.038 |
| MGEA5    | 2.13 | 0.000351 | 0.036 |
| AMD1     | 2.14 | 0.000334 | 0.035 |
| CKS2     | 2.15 | 0.000316 | 0.033 |
| EBAG9    | 2.15 | 0.000316 | 0.033 |
| RNF146   | 2.15 | 0.000316 | 0.033 |
| TXNIP    | 2.15 | 0.000316 | 0.033 |
| UBE2J2   | 2.15 | 0.000316 | 0.033 |
| BEND3    | 2.16 | 0.000297 | 0.033 |
| SMEK1    | 2.16 | 0.000297 | 0.033 |
| UNK      | 2.16 | 0.000609 | 0.054 |
| AGPAT2   | 2.17 | 0.000576 | 0.052 |
| OXSM     | 2.17 | 0.000279 | 0.032 |
| PGRMC2   | 2.17 | 0.000576 | 0.052 |
| STT3A    | 2.17 | 0.001176 | 0.087 |

|         |      |          |       |
|---------|------|----------|-------|
| FBXO11  | 2.19 | 0.000251 | 0.03  |
| MED13L  | 2.19 | 0.000252 | 0.03  |
| L1TD1   | 2.2  | 0.000237 | 0.029 |
| SLC30A6 | 2.2  | 0.000237 | 0.029 |
| AUP1    | 2.21 | 0.000461 | 0.045 |
| PCBP2   | 2.22 | 0.000214 | 0.027 |
| FLI1    | 2.23 | 0.000201 | 0.025 |
| NFRKB   | 2.24 | 0.000191 | 0.024 |
| RFC1    | 2.25 | 0.00339  | 0.171 |
| ACSL4   | 2.27 | 0.000157 | 0.021 |
| EMC4    | 2.27 | 0.000157 | 0.021 |
| NUP93   | 2.27 | 0.001488 | 0.103 |
| CCT4    | 2.28 | 0.001427 | 0.1   |
| AK6     | 2.29 | 0.000304 | 0.033 |
| SEPHS1  | 2.29 | 0.000139 | 0.019 |
| TAF1    | 2.29 | 0.000304 | 0.033 |
| AGPAT1  | 2.32 | 0.000256 | 0.03  |
| LIPA    | 2.33 | 0.00011  | 0.016 |
| PEX7    | 2.38 | 0.000084 | 0.012 |
| AGPS    | 2.41 | 0.000159 | 0.021 |
| C9orf41 | 2.42 | 0.00015  | 0.02  |
| PDCD5   | 2.46 | 0.000048 | 0.007 |
| PEX10   | 2.46 | 0.000118 | 0.016 |
| VWA9    | 2.46 | 0.000118 | 0.016 |
| INTS12  | 2.47 | 0.000044 | 0.007 |
| KMT2B   | 2.47 | 0.000045 | 0.007 |
| SLC7A1  | 2.51 | 0.000516 | 0.049 |
| PKNOX1  | 2.52 | 0.000088 | 0.013 |
| GCH1    | 2.55 | 0.000031 | 0.005 |
| ZNF668  | 2.57 | 0.000028 | 0.004 |
| ASXL3   | 2.58 | 0.000026 | 0.004 |
| KLF16   | 2.58 | 0.000063 | 0.009 |
| EMC8    | 2.59 | 0.000025 | 0.004 |
| FUBP1   | 2.59 | 0.000024 | 0.004 |
| HNRNPA0 | 2.59 | 0.000024 | 0.004 |
| SMG5    | 2.59 | 0.002414 | 0.138 |
| UCHL5   | 2.59 | 0.000025 | 0.004 |
| TTC14   | 2.61 | 0.000022 | 0.004 |
| PHF20   | 2.62 | 0.00002  | 0.003 |
| PEX19   | 2.63 | 0.000019 | 0.003 |
| HLCS    | 2.68 | 0.000037 | 0.006 |
| ANKRD50 | 2.74 | 0.000009 | 0.001 |
| ACAA1   | 2.76 | 0.000008 | 0.001 |
| CLK3    | 2.76 | 0.000008 | 0.001 |
| PEX14   | 2.76 | 0.000008 | 0.001 |
| PEX5    | 2.8  | 0.000006 | 0.001 |
| RMND5A  | 2.88 | 0.000004 | 0     |

|          |      |          |       |
|----------|------|----------|-------|
| GID4     | 2.9  | 0.000004 | 0     |
| RPL8     | 2.9  | 0.000813 | 0.065 |
| SLC30A5  | 2.92 | 0.000003 | 0     |
| NSD1     | 2.93 | 0.000009 | 0.001 |
| BRD2     | 2.94 | 0.000008 | 0.001 |
| PTPN1    | 2.95 | 0.000008 | 0.001 |
| PEX26    | 2.96 | 0.000007 | 0.001 |
| PANK4    | 2.97 | 0.000002 | 0     |
| PEX13    | 2.99 | 0.000002 | 0     |
| RRM1     | 3.01 | 0.001942 | 0.124 |
| PEX2     | 3.02 | 0.000002 | 0     |
| TFAP4    | 3.03 | 0.000002 | 0     |
| INSIG1   | 3.05 | 0.000004 | 0     |
| CREBBP   | 3.08 | 0.000001 | 0     |
| INO80C   | 3.09 | 0.000001 | 0     |
| PEX6     | 3.16 | 0.000001 | 0     |
| RER1     | 3.17 | 0.000001 | 0     |
| RPRD1B   | 3.21 | 0.000001 | 0     |
| BPTF     | 3.22 | 0.000002 | 0     |
| EIF4A1   | 3.3  | 0.000001 | 0     |
| RAB7A    | 3.3  | 0.000001 | 0     |
| PEX16    | 3.31 | 0.000001 | 0     |
| UBE2H    | 3.34 | 0.000001 | 0     |
| SREBF1   | 3.35 | 0.000001 | 0     |
| MAEA     | 3.51 | 0.000001 | 0     |
| PEX12    | 3.56 | 0.000001 | 0     |
| PEX1     | 3.58 | 0.000001 | 0     |
| PEX3     | 3.6  | 0.000001 | 0     |
| ACTR5    | 3.67 | 0.000001 | 0     |
| HSD17B12 | 3.73 | 0.000001 | 0     |
| MKLN1    | 3.74 | 0.000001 | 0     |
| C7orf26  | 3.82 | 0.000001 | 0     |
| PIH1D1   | 3.97 | 0.000001 | 0     |
| ASUN     | 4.14 | 0.000001 | 0     |
| INTS10   | 4.17 | 0.000001 | 0     |
| ACSL3    | 4.22 | 0.000001 | 0     |
| ARMC8    | 4.23 | 0.000001 | 0     |
| ACACA    | 4.26 | 0.000001 | 0     |
| FAF2     | 4.3  | 0.000001 | 0     |
| HSP90B1  | 4.34 | 0.000001 | 0     |
| HMGCL    | 4.47 | 0.000001 | 0     |
| FDFT1    | 4.73 | 0.000001 | 0     |
| LDLR     | 6.08 | 0.000001 | 0     |
| ABCD3    | 6.35 | 0.000001 | 0     |
| LDLRAP1  | 7.19 | 0.000001 | 0     |
